# Supplementary material for: Picolinamide-assisted ortho-C–H functionalization of pyrenylglycine derivatives using aryl iodides
Source: Royal Society of Chemistry journal article supplement (doi:10.1039/d3ob01731a), 2024-01-01
Supplement: d3ob01731a1.pdf [file d3ob01731a1.pdf]

## Electronic Supplementary Information (ESI)

### Picolinamide-assisted ortho-C-H functionalization of pyrenylglycine derivatives using aryl iodides

Arup Dalal, Subhankar Bodak and Srinivasarao Arulananda Babu\*

*Department of Chemical Sciences, Indian Institute of Science Education and Research (IISER) Mohali, Knowledge City, Sector 81, SAS Nagar, Mohali, Manauli P.O., Punjab, India, 140306. E-mail: sababu@iisermohali.ac.in.*

#### Contents

|                                                                                                                        |                 |
|------------------------------------------------------------------------------------------------------------------------|-----------------|
| X-ray structure and brief crystal data of compounds <b>6r</b>                                                          | = pages 2-3     |
| Copies of NMR spectra (proton, carbon and fluorine NMR) of compounds                                                   | = pages 4-388   |
| Copies of absorption and preliminary emission spectral data, and integrated fluorescence intensity vs absorbance plots | = pages 389-410 |
| Experimental Procedures                                                                                                | = pages 411-412 |

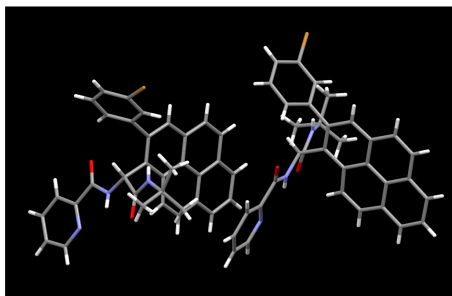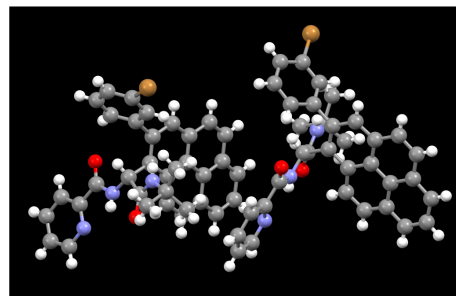

The unit cell contains two molecules

X-ray structure of compound **6r**

CCDC 2294407

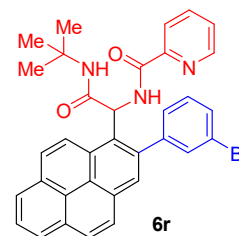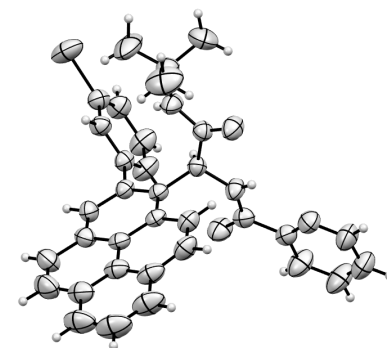

Ellipsoid probability = 50 %

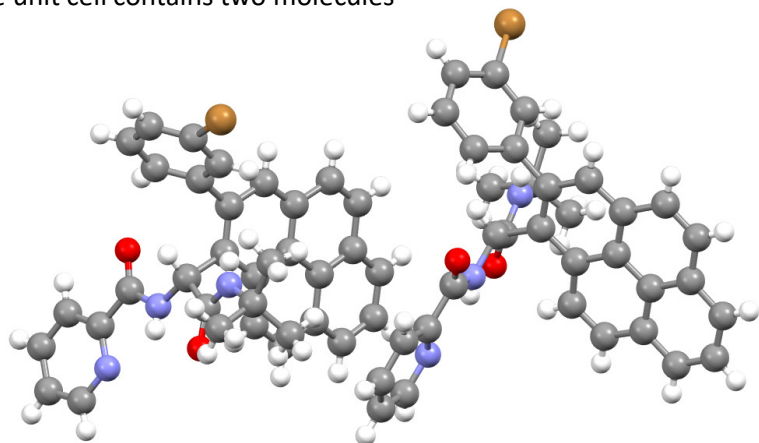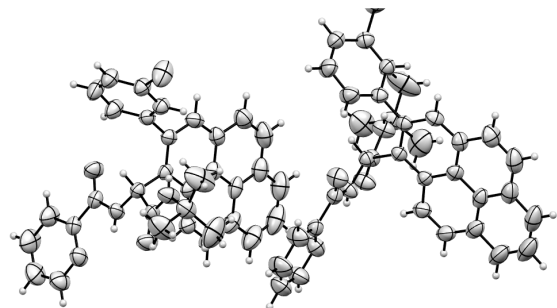

Ellipsoid probability = 50 %

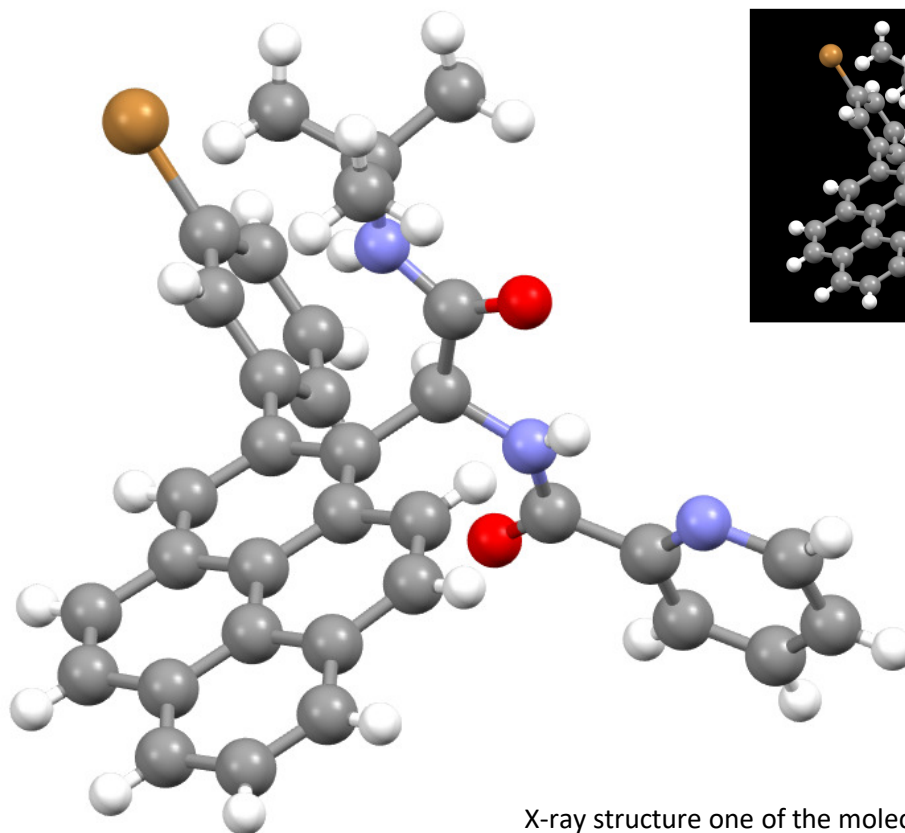

X-ray structure one of the molecule  
The unit cell contains two molecules<sub>2</sub>

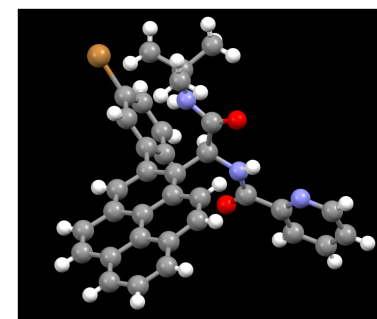

## Brief crystal data of compound **6r**

CCDC 2294407

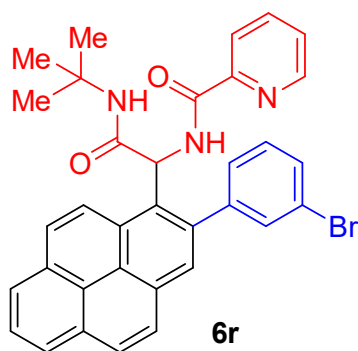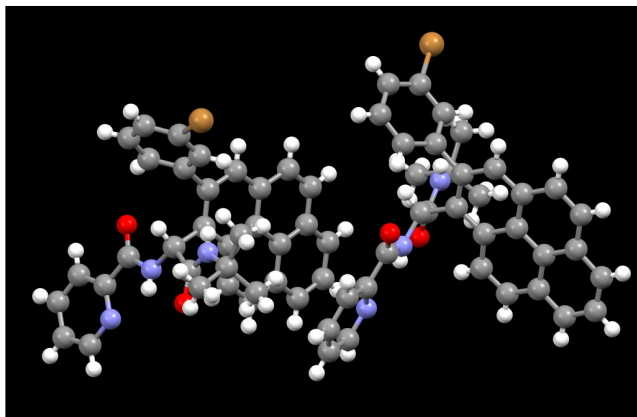

## checkCIF/PLATON report

Structure factors have been supplied for datablock(s) exp\_603

THIS REPORT IS FOR GUIDANCE ONLY. IF USED AS PART OF A REVIEW PROCEDURE FOR PUBLICATION, IT SHOULD NOT REPLACE THE EXPERTISE OF AN EXPERIENCED CRYSTALLOGRAPHIC REFEREE.

No syntax errors found. CIF dictionary Interpreting this report

## Datablock: exp\_603

Bond precision: C-C = 0.0056 Å Wavelength=0.71073  
Cell: a=9.6137 (19) b=18.354 (3) c=18.491 (3)  
alpha=61.325 (17) beta=89.722 (15) gamma=89.850 (15)  
Temperature: 293 K

|                        | Calculated       | Reported         |
|------------------------|------------------|------------------|
| Volume                 | 2862.5 (10)      | 2862.5 (10)      |
| Space group            | P -1             | P -1             |
| Hall group             | -P 1             | -P 1             |
| Moiety formula         | C34 H28 Br N3 O2 | C34 H28 Br N3 O2 |
| Sum formula            | C34 H28 Br N3 O2 | C34 H28 Br N3 O2 |
| Mr                     | 590.49           | 590.50           |
| Dx, g cm <sup>-3</sup> | 1.370            | 1.370            |
| Z                      | 4                | 4                |
| Mu (mm <sup>-1</sup> ) | 1.472            | 1.472            |
| F000                   | 1216.0           | 1216.0           |
| F000'                  | 1215.28          |                  |
| h, k, lmax             | 14, 27, 28       | 14, 26, 27       |
| Nref                   | 21108            | 17050            |
| Tmin, Tmax             | 0.484, 0.555     | 0.579, 1.000     |
| Tmin'                  | 0.474            |                  |

Correction method= # Reported T Limits: Tmin=0.579 Tmax=1.000  
AbsCorr = MULTI-SCAN

Data completeness= 0.808 Theta(max)= 32.723

R(reflections)= 0.0597 ( 8340)

wR2(reflections)=  
0.2088 ( 17050)

S = 1.000

Npar= 743

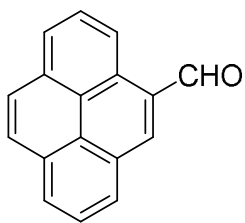

**3d**

7.2800  
7.9805  
8.0011  
8.0243  
8.0474  
8.0561  
8.0759  
8.0954  
8.0954  
8.1982  
8.2086  
8.2162  
8.2511  
8.2701  
8.4046  
9.5312  
9.5510  
10.4294

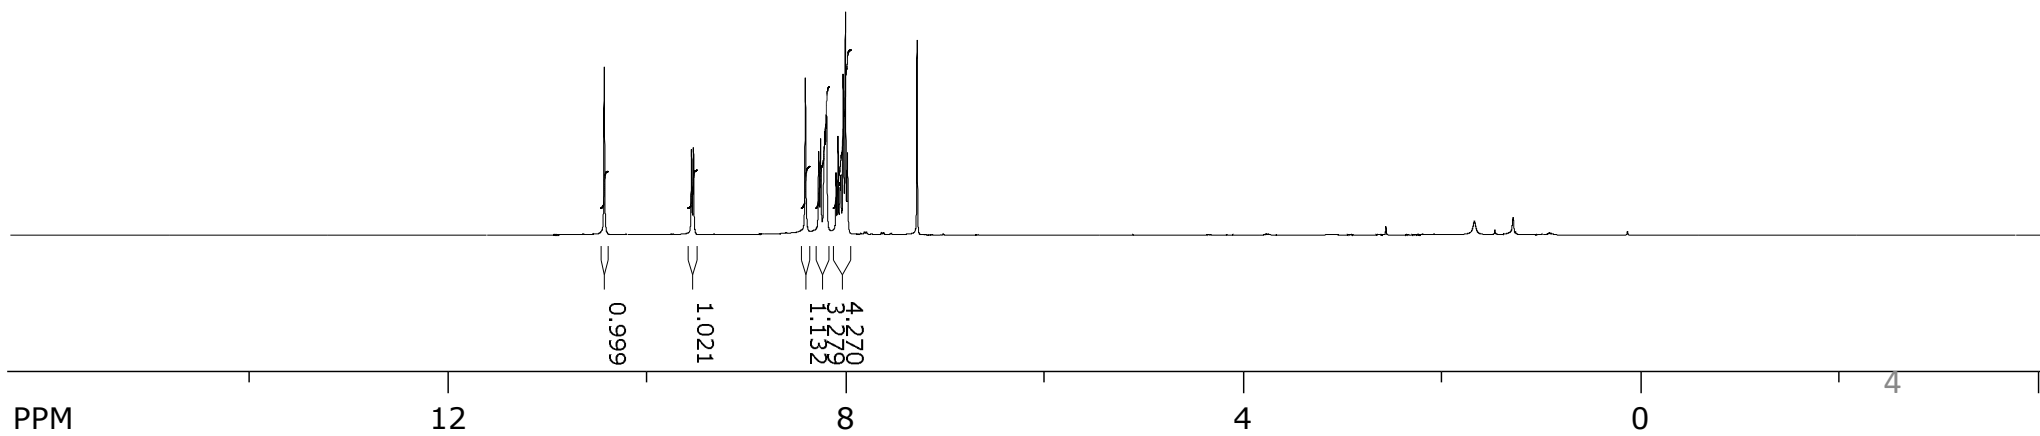

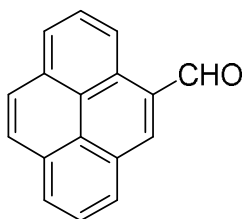

**3d**

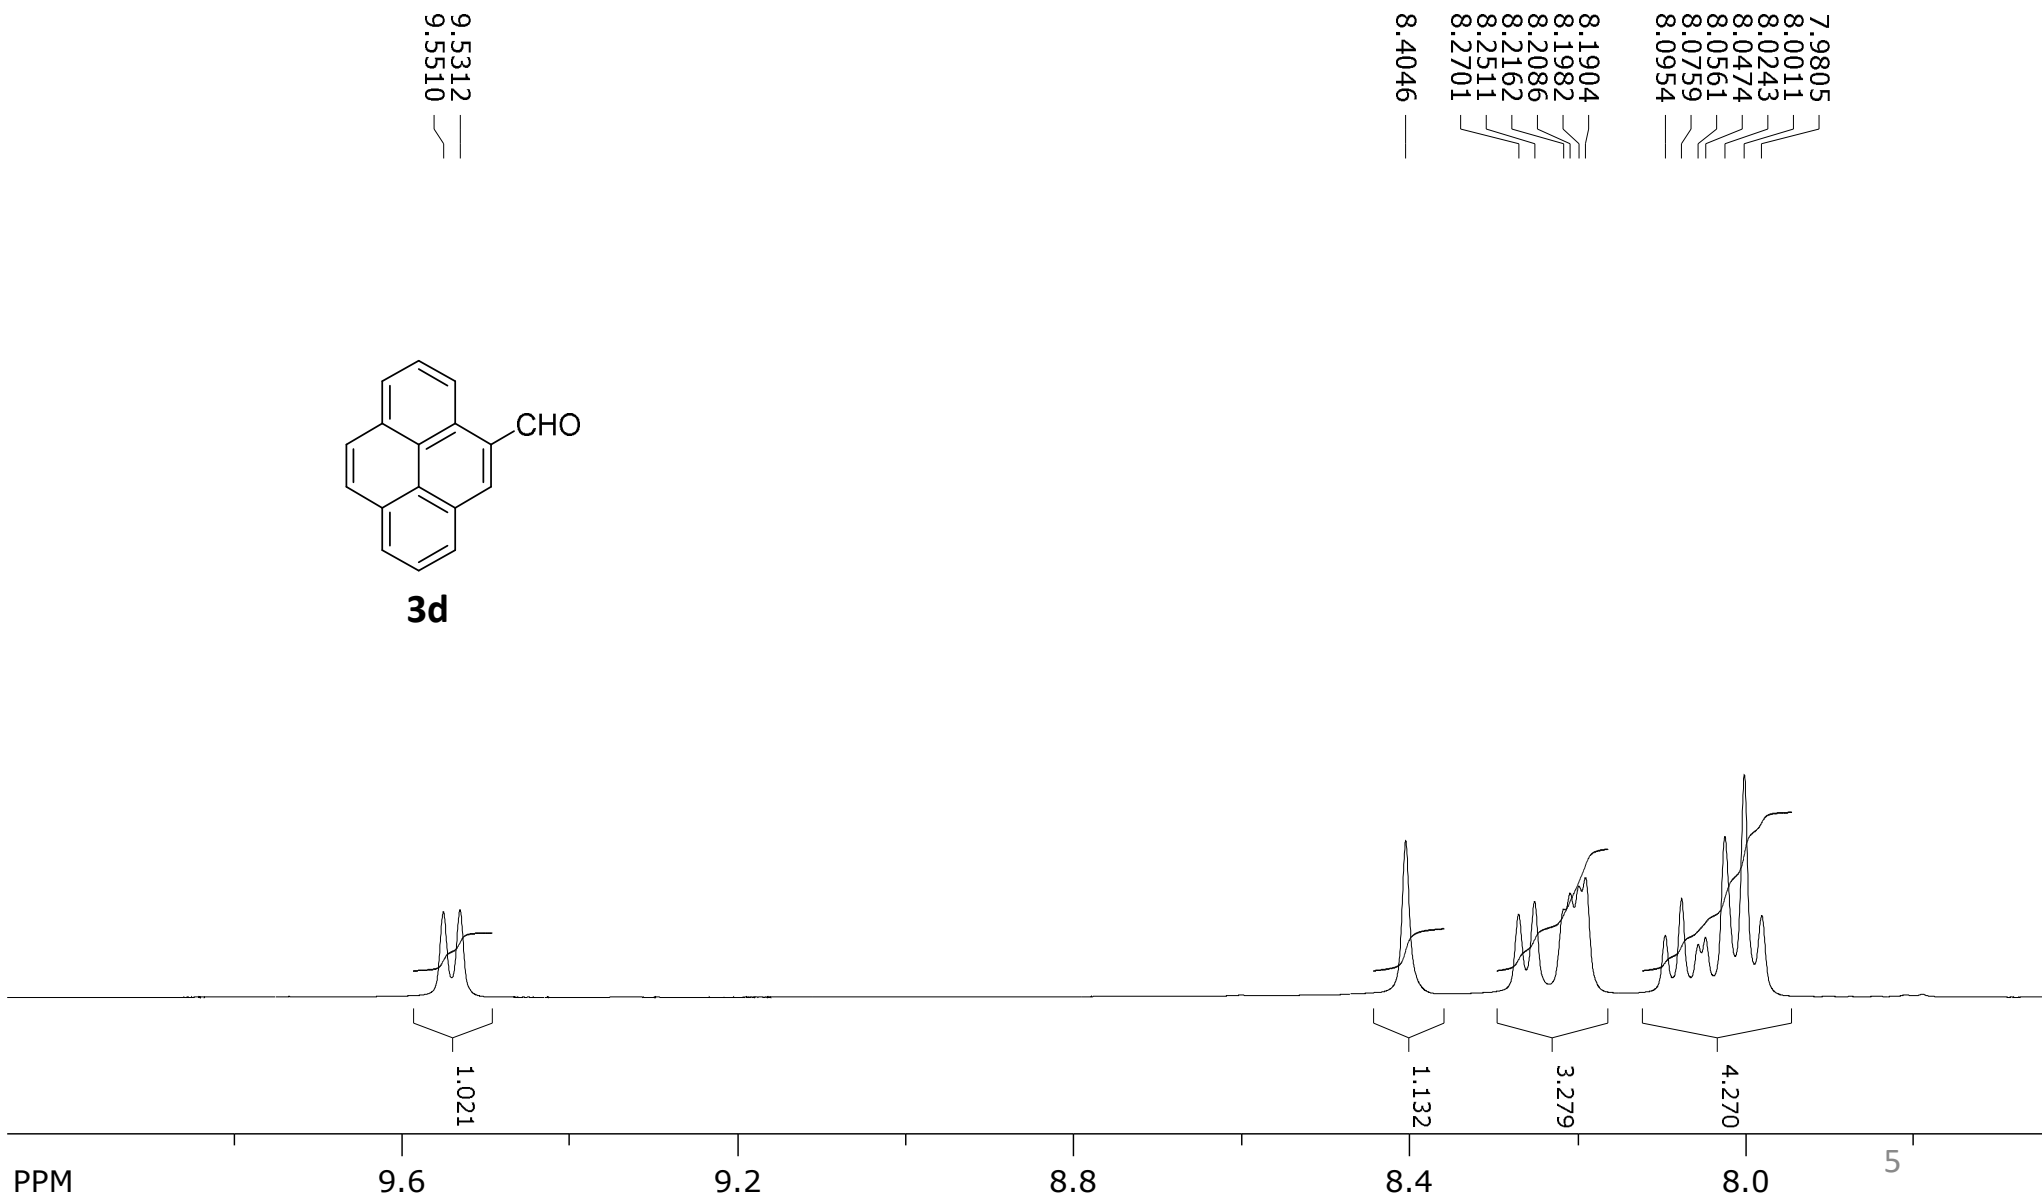

SpinWorks 4: AD-2267-A

193.7902

123.6007  
125.0524  
125.9471  
126.2812  
126.3211  
126.6399  
126.9289  
127.1154  
127.2597  
128.2624  
129.5616  
129.1845  
130.9886  
131.0479  
131.1455  
141.6551

76.7590  
77.0766  
77.3941

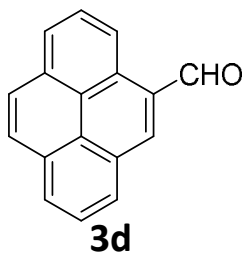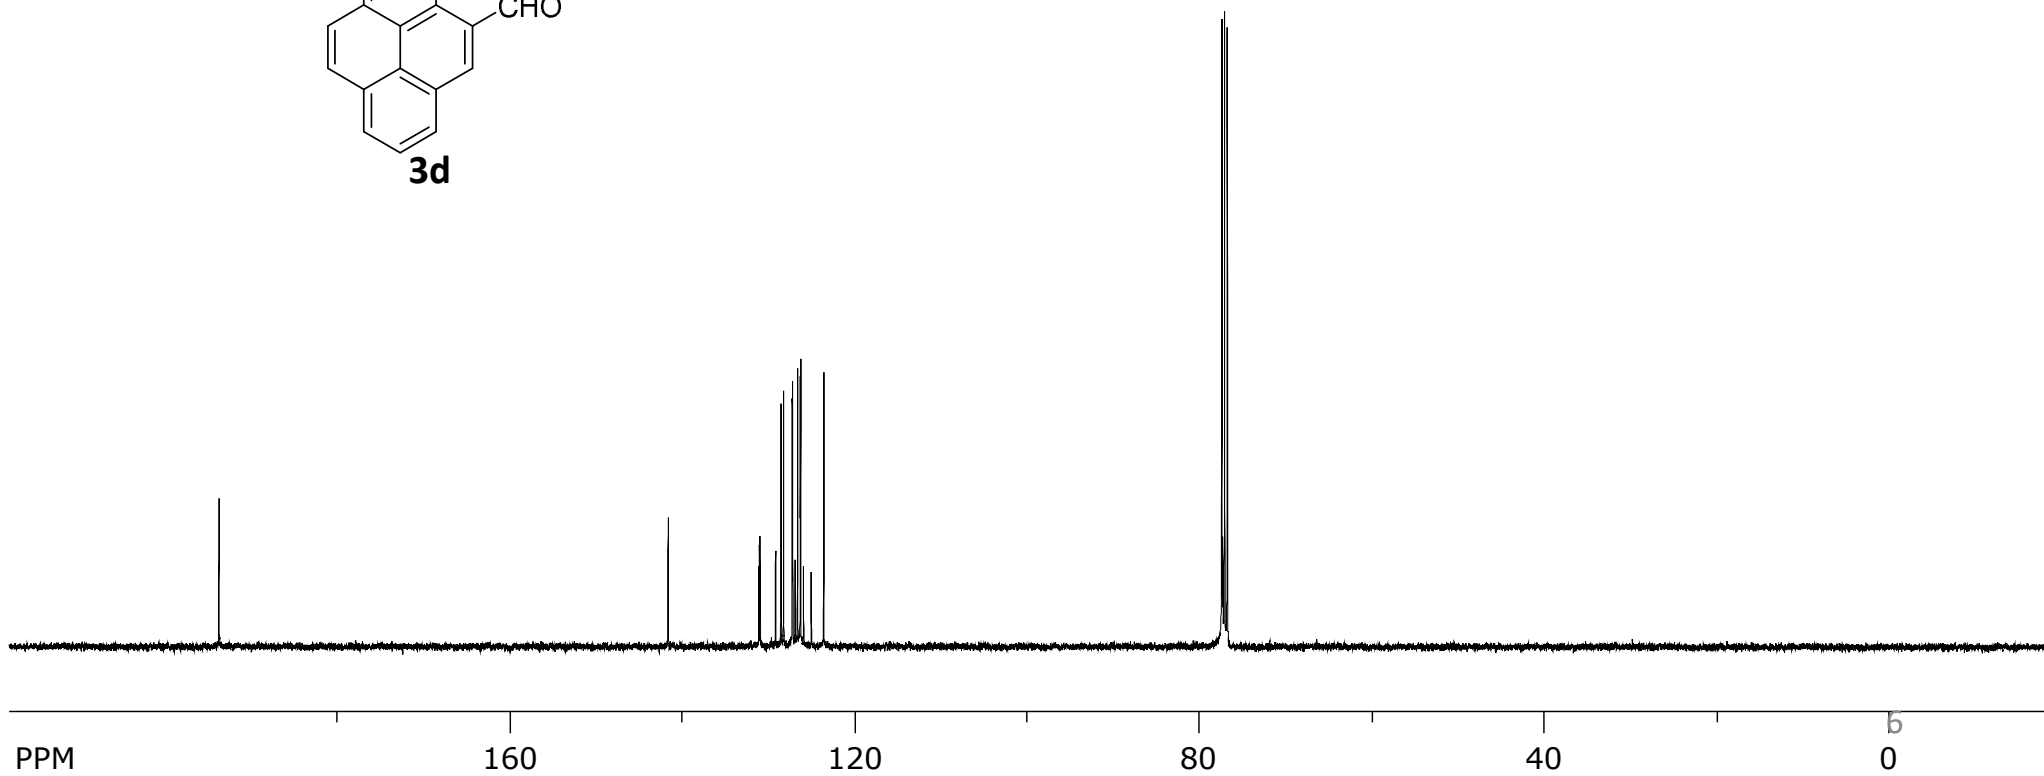

SpinWorks 4: AD-2267-A

193.7902 —

141.6551 —

123.6007  
125.0524  
125.9471  
126.2812  
126.3211  
126.6399  
126.9280  
127.2027  
127.2597  
128.2624  
128.5616  
129.1845  
130.9886  
131.0479  
131.1455

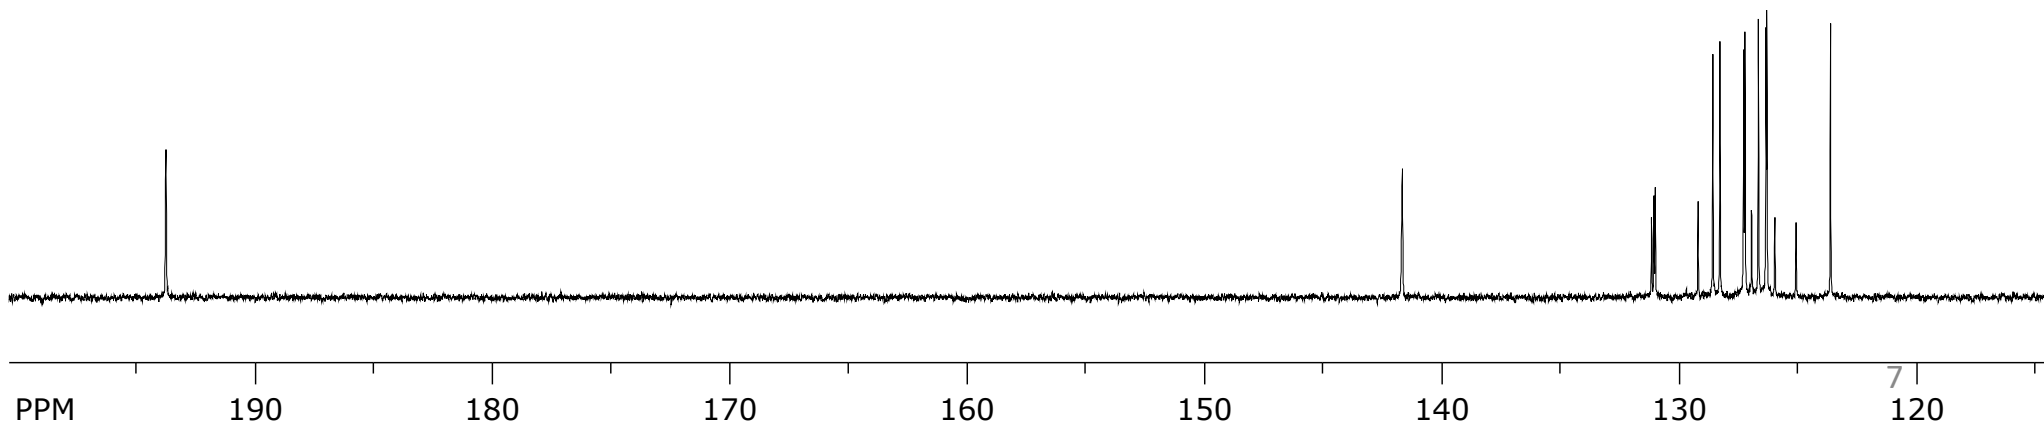

SpinWorks 4: AD-1821  
PROTON CDCl3 /opt/topspin3.5pl2/nmrdata nmrsu 19

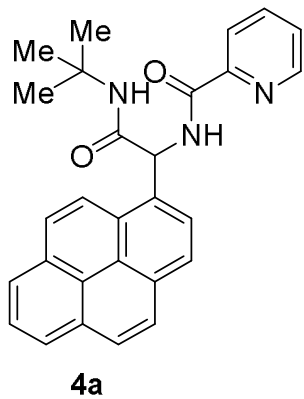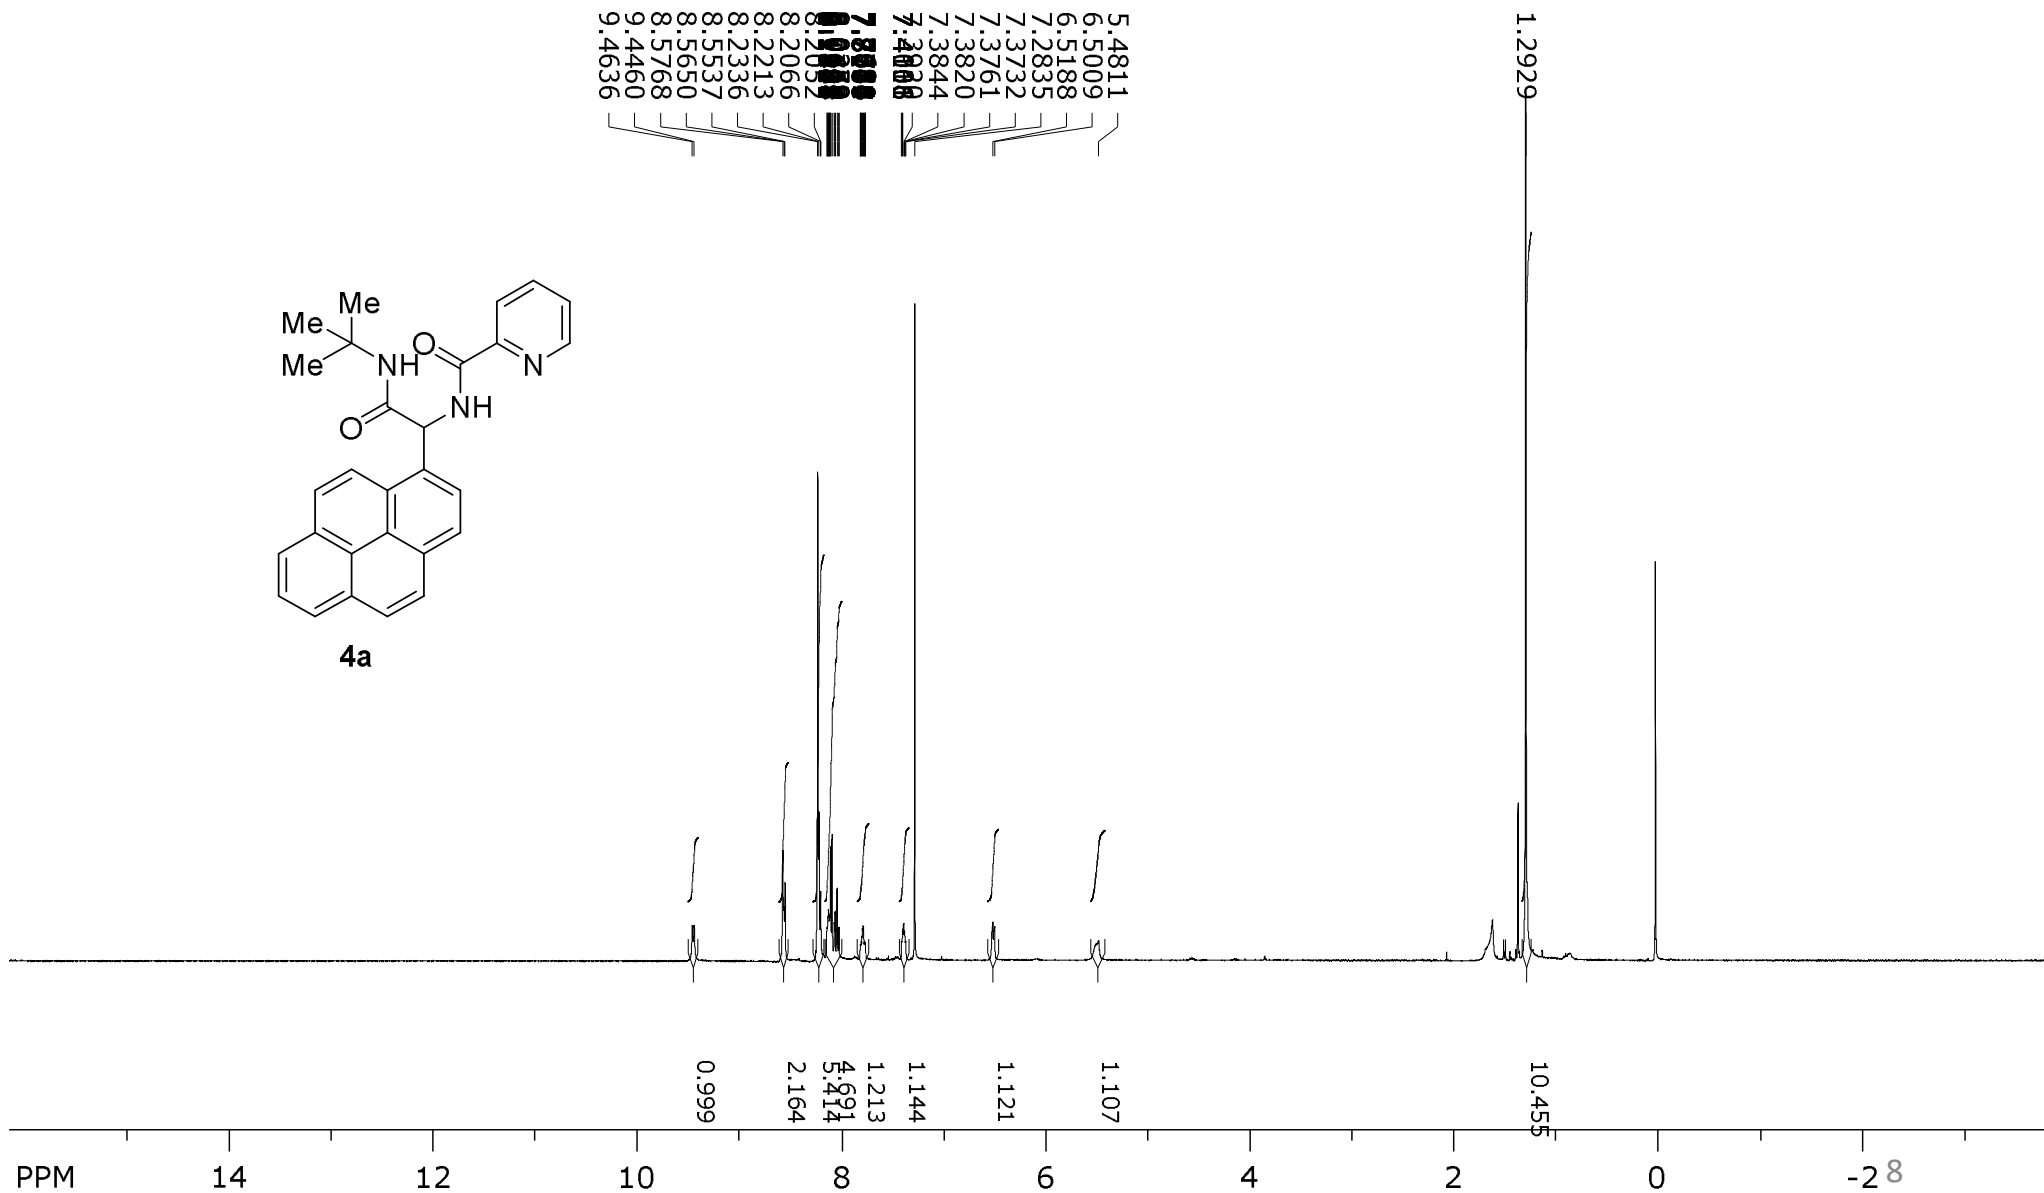



SpinWorks 4: AD-1821  
PROTON CDCl3 /opt/topspin3.5pl2/nmrdata nmrsu 19

9.4460  
9.4636

8.5537  
8.5650  
8.5768

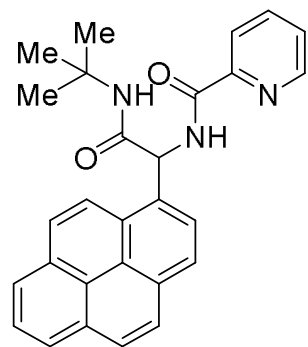

**4a**

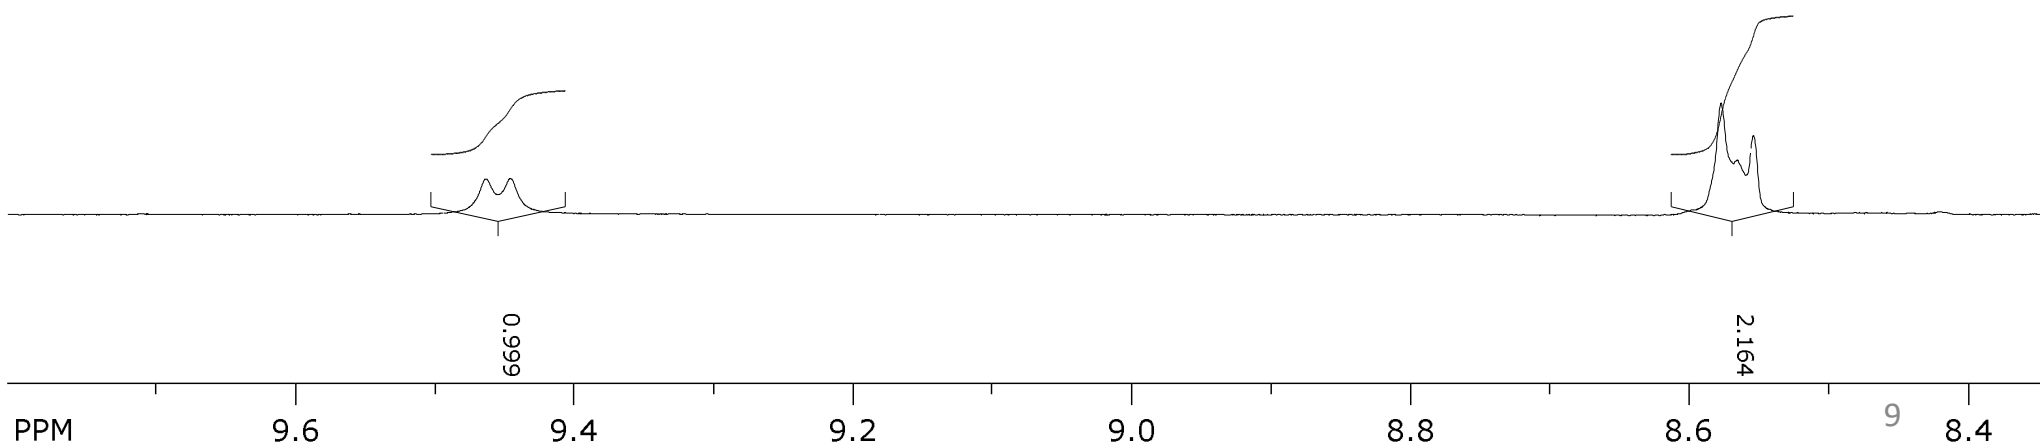

SpinWorks 4: AD-1821  
PROTON CDCl3 /opt/topspin3.5pl2/nmrdata nmrsu 19

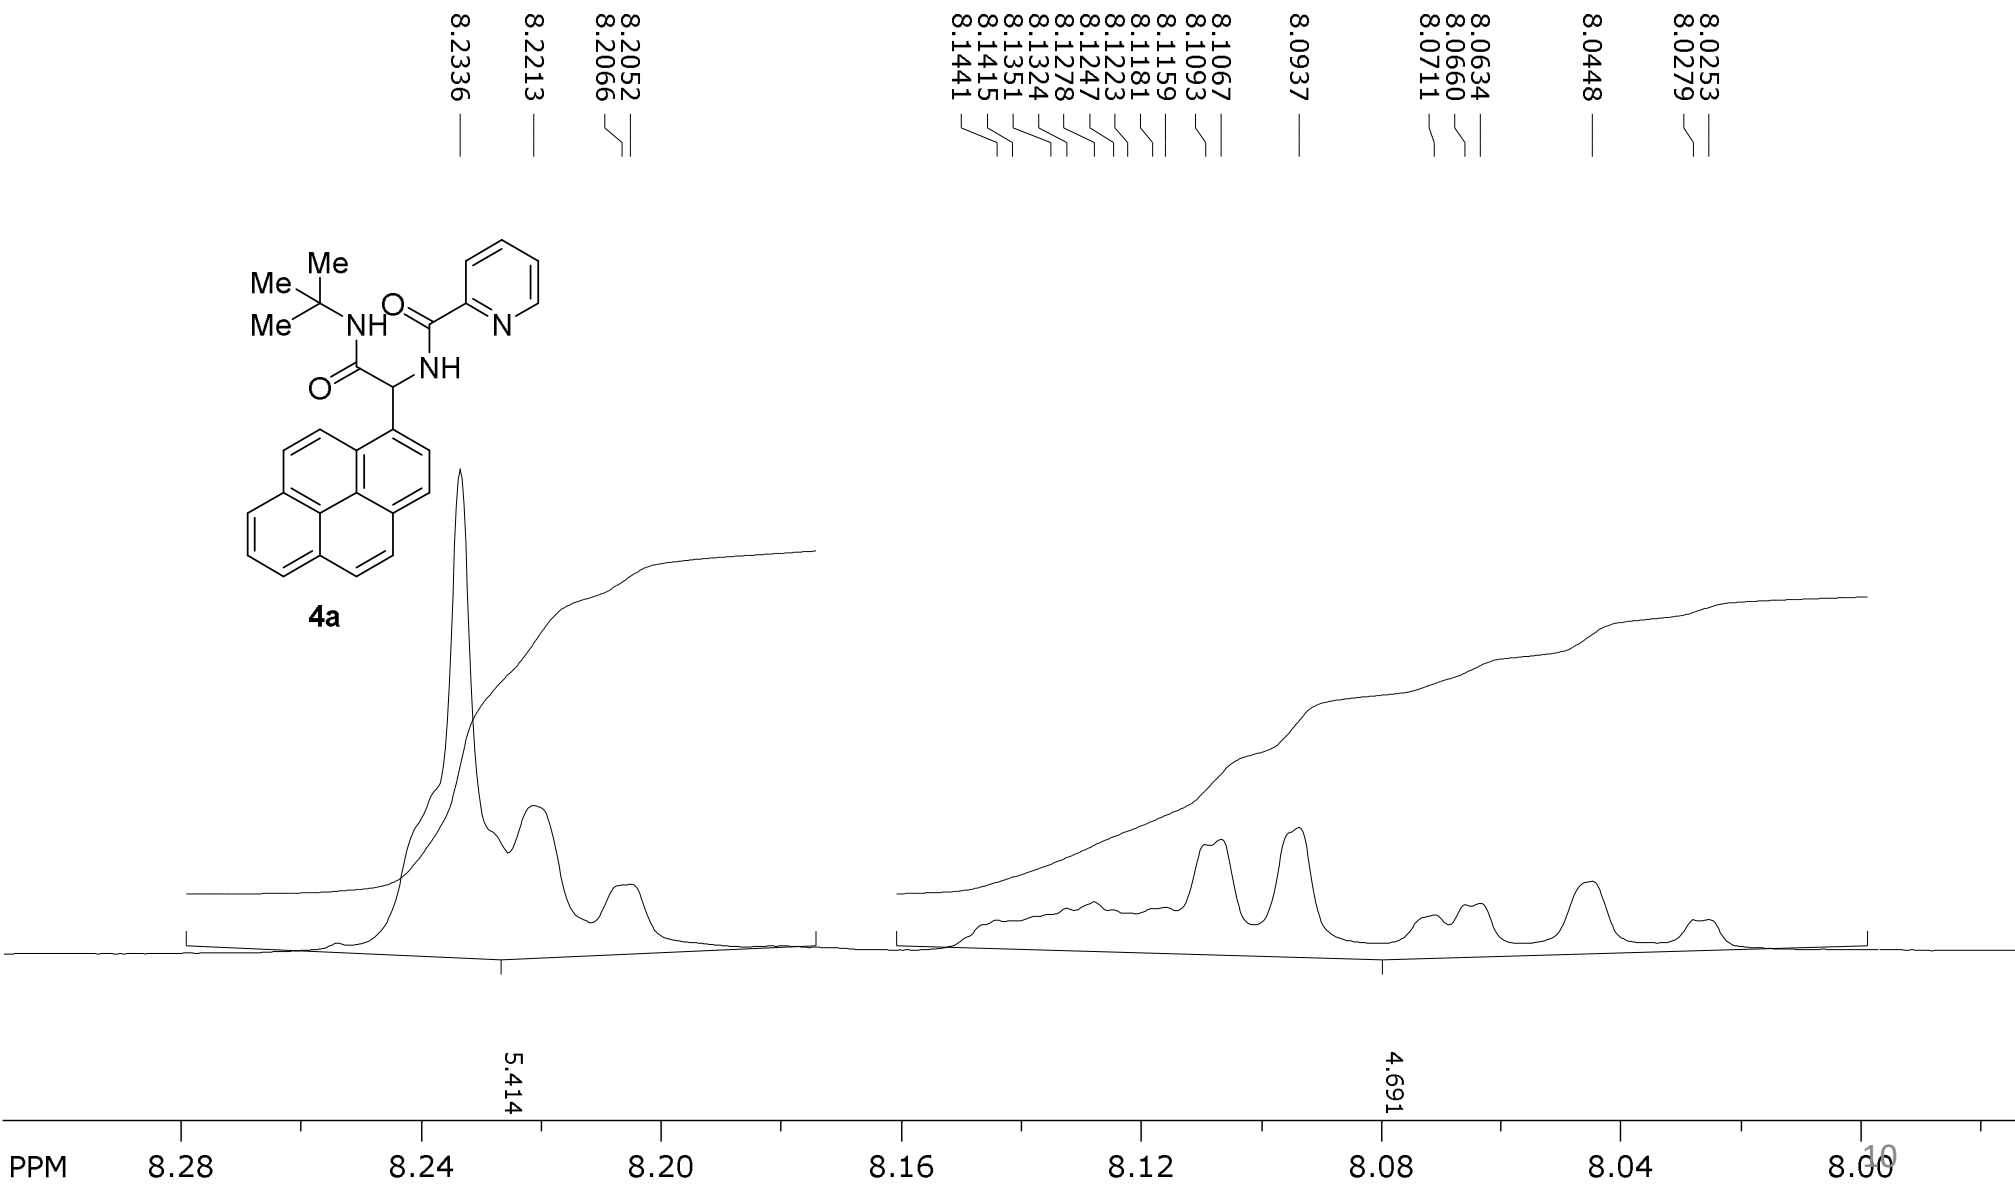

SpinWorks 4: AD-1821  
PROTON CDCl3 /opt/topspin3.5pl2/nmrdata nmrsu 19

7.7691 —  
7.7720 —  
7.7730 —  
7.7754 —  
7.7774 —  
7.7846 —  
7.7884 —  
7.7917 —  
7.7966 —  
7.8012 —  
7.8074 —  
7.8105 —  
7.8137 —  
7.8160 —

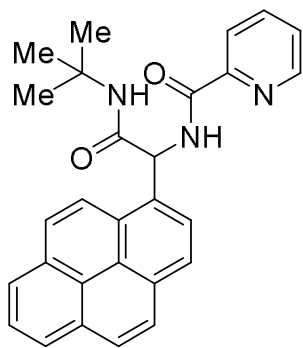

**4a**

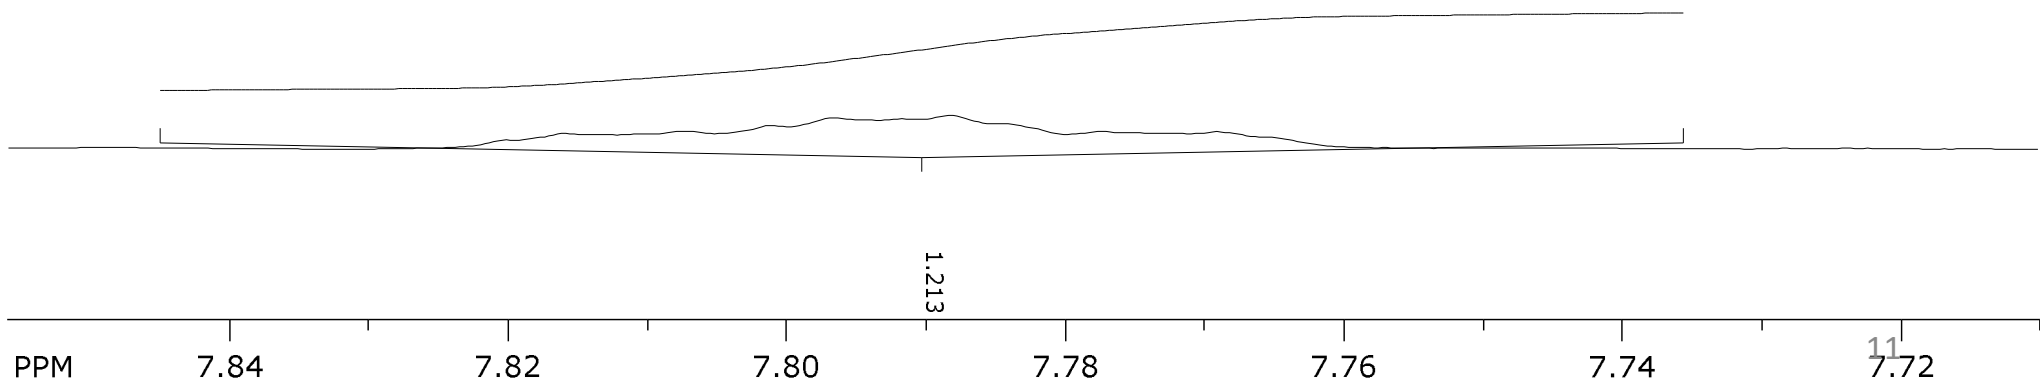

SpinWorks 4: AD-1821  
PROTON CDCl3 /opt/topspin3.5pl2/nmrdata nmrsu 19

7.2835  
7.3732  
7.3761  
7.3820  
7.3844  
7.3920  
7.4006  
7.4031  
7.4101  
7.4118

6.5009  
6.5188

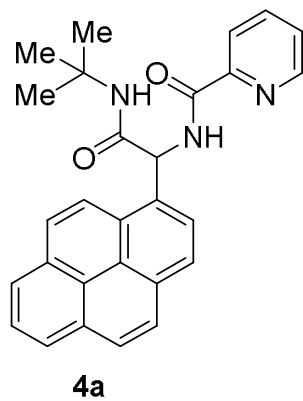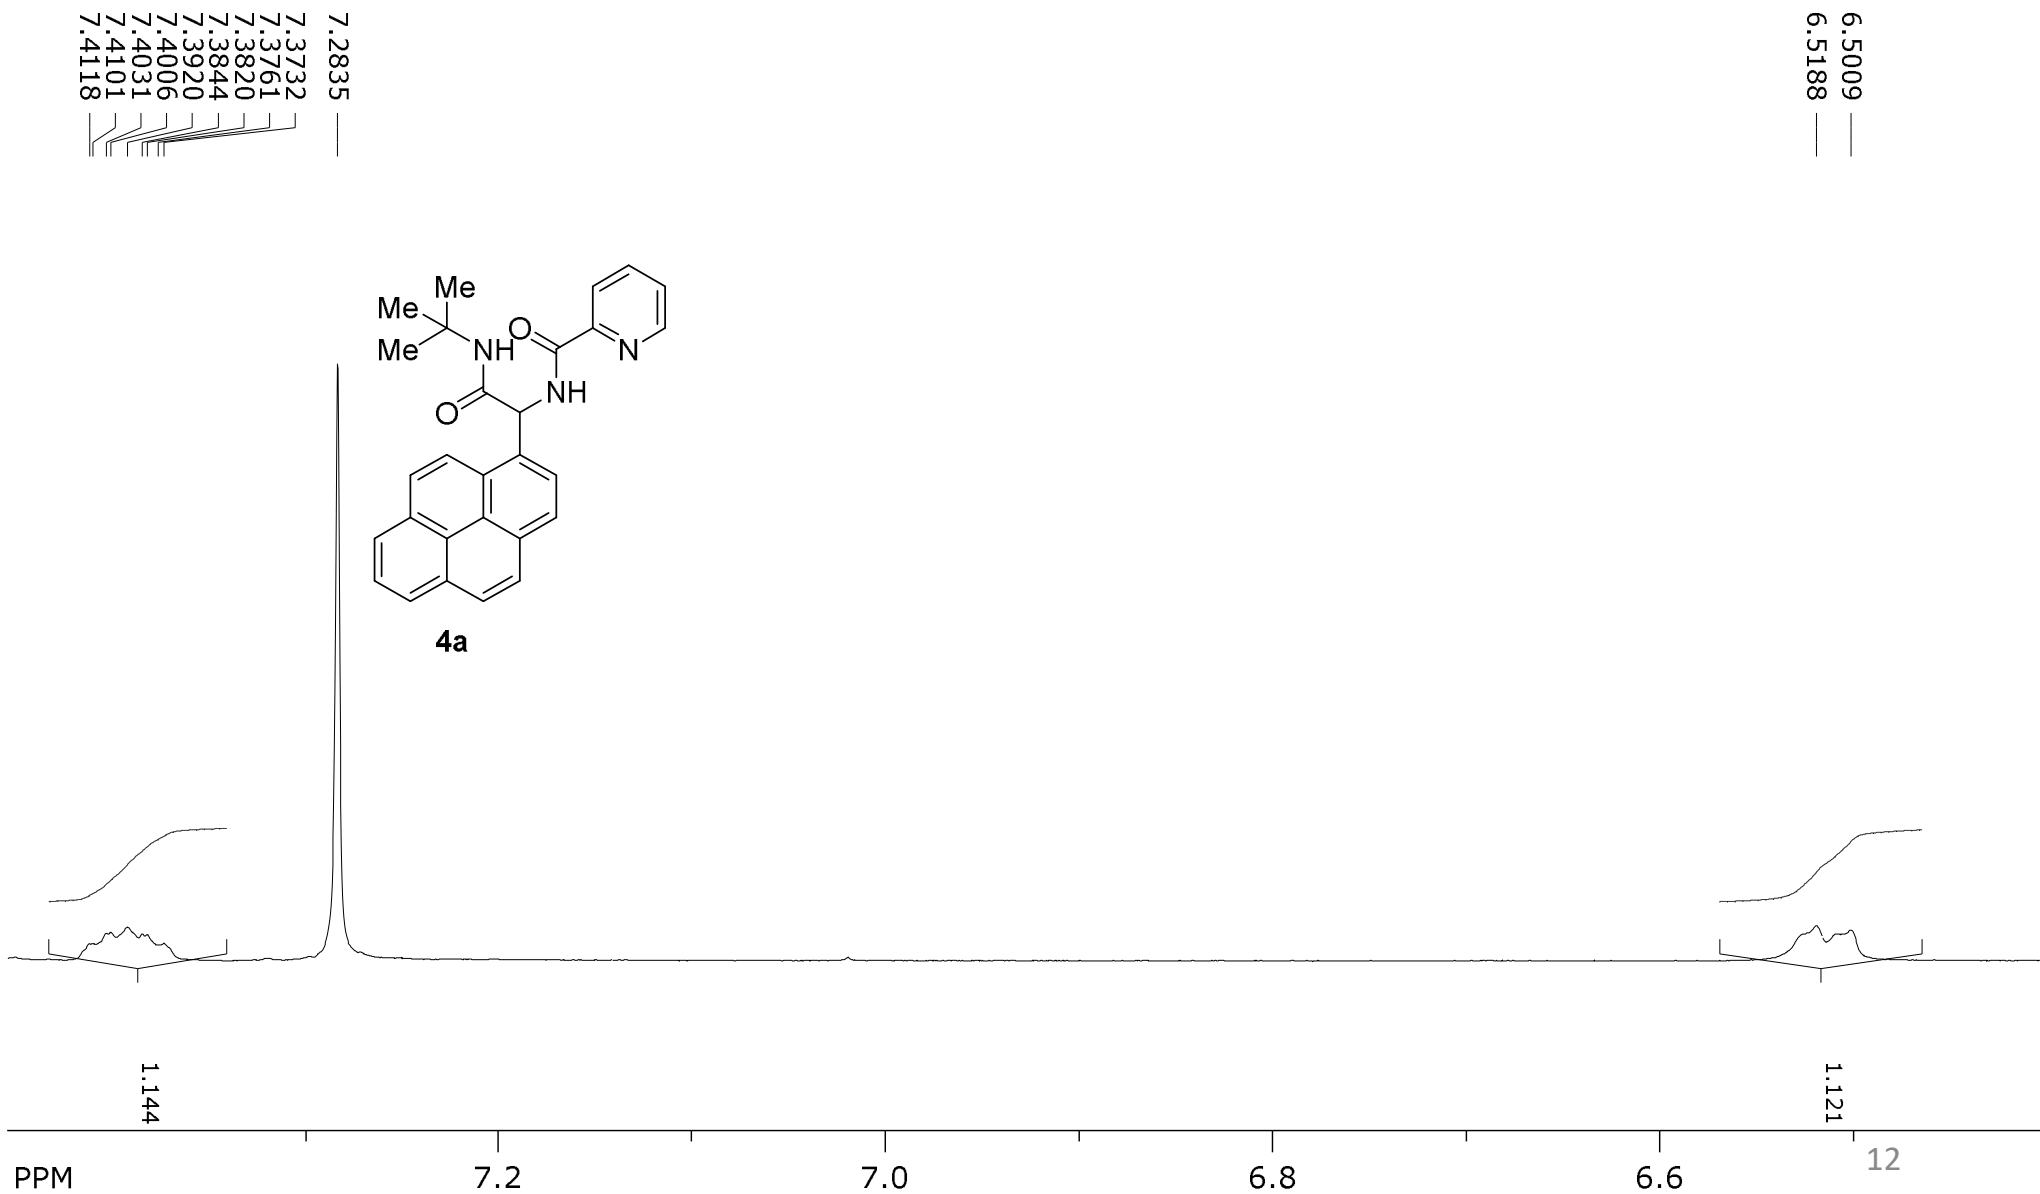

SpinWorks 4: AD-1821  
PROTON CDCl3 /opt/topspin3.5pl2/nmrdata nmrsu 19

5.4811

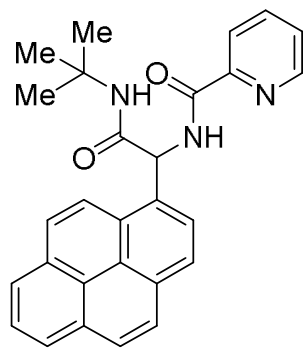

4a

1.2929

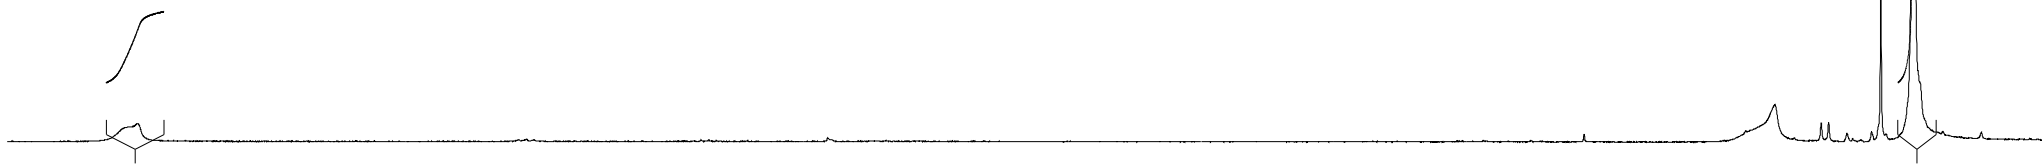

1.107

10.455

PPM 5.2 4.8 4.4 4.0 3.6 3.2 2.8 2.4 2.0 1.6 13 1.2



SpinWorks 4: AD 1872  
PROTON CDCl3 /opt/topspin3.5pl2/nmrdata nmrsu 34

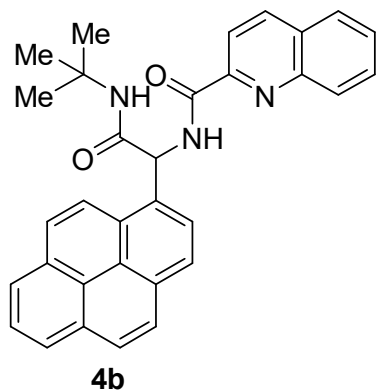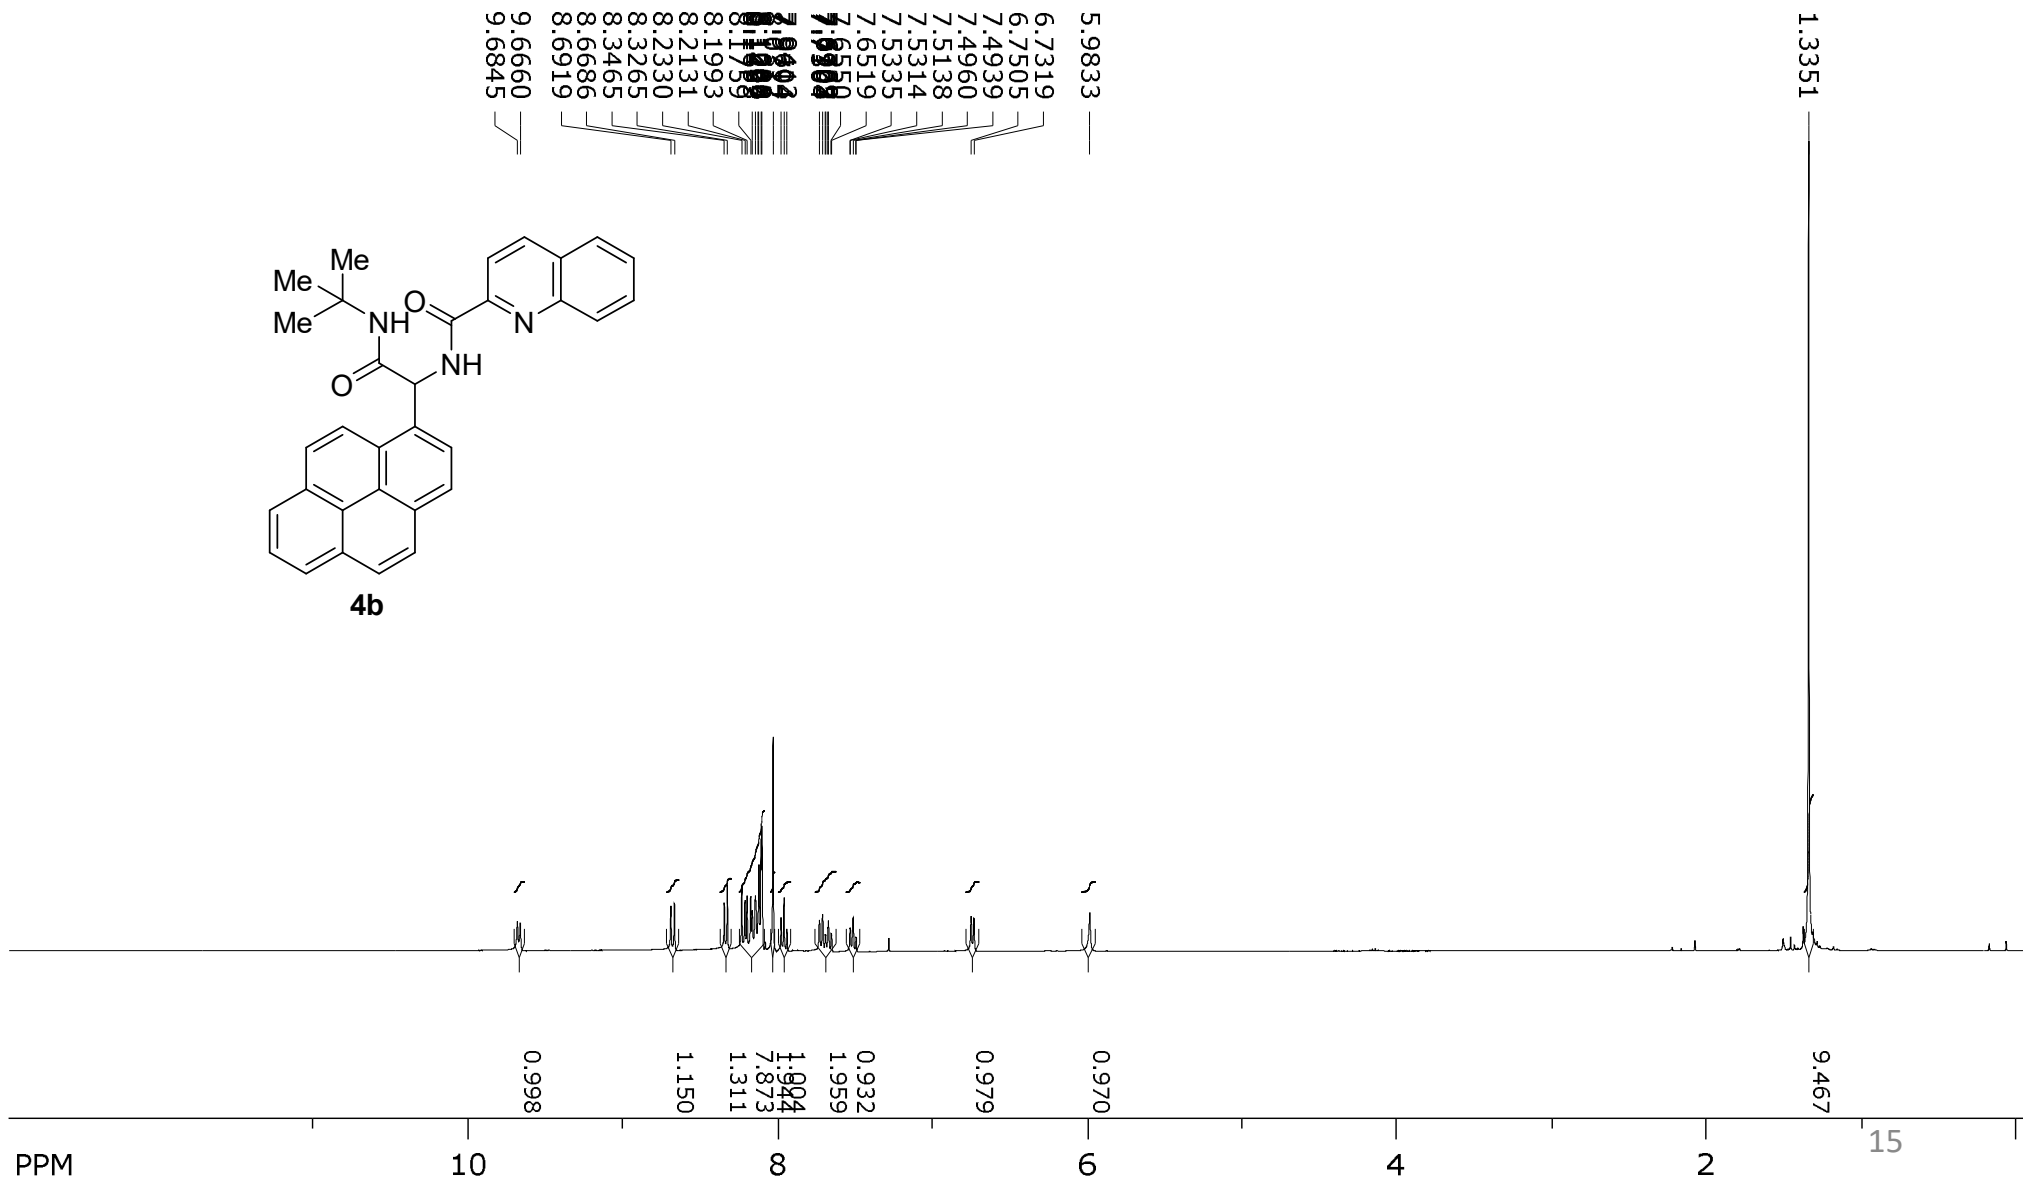

SpinWorks 4: AD 1872  
PROTON CDCl3 /opt/topspin3.5pl2/nmrdata nmrsu 34

9.6660  
9.6845

8.6686  
8.6919

8.1032  
8.1088  
8.1226  
8.1299  
8.1457  
8.1653  
8.1759  
8.1993  
8.2131  
8.2330  
8.3265  
8.3465  
8.0312  
7.9413  
7.9604  
7.9794

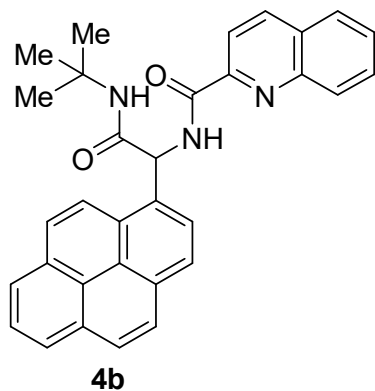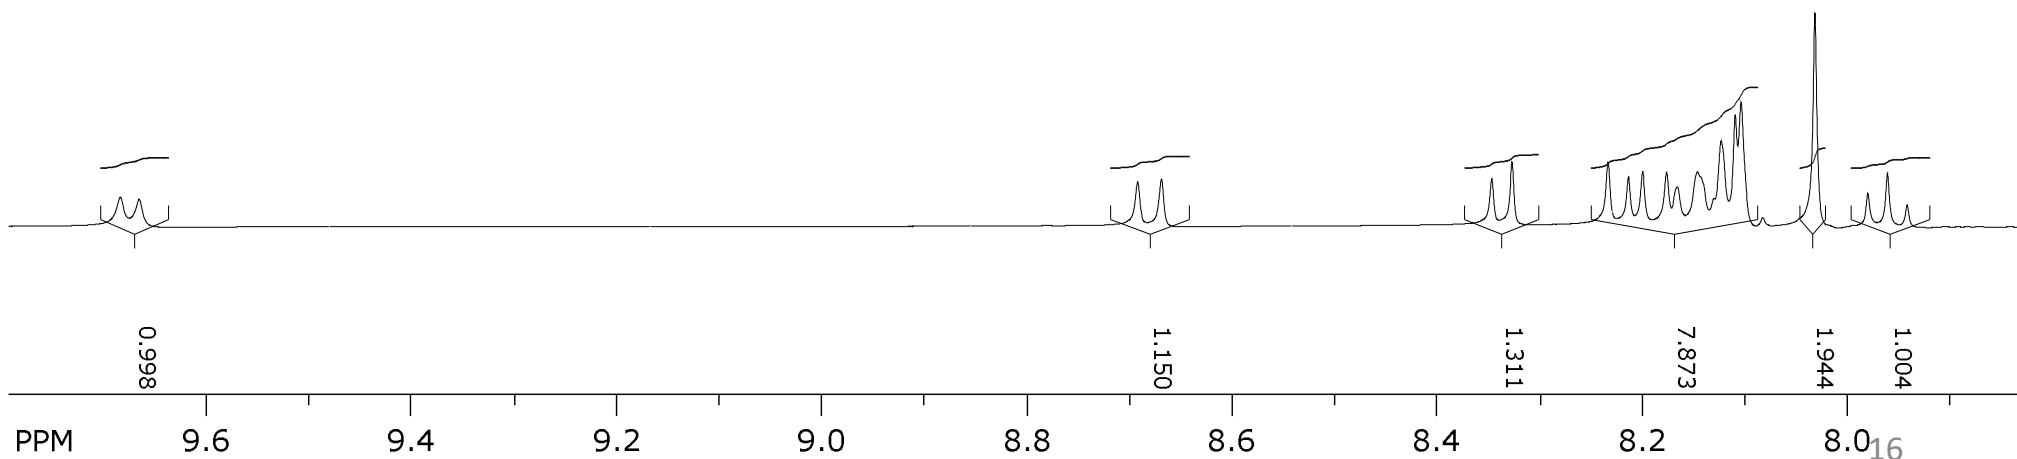



SpinWorks 4: AD 1872  
PROTON CDCl3 /opt/topspin3.5pl2/nmrdata nmrsu 34

7.49339  
7.49360  
7.51338  
7.53144  
7.53335  
7.65119  
7.65550  
7.67229  
7.67662  
7.69077  
7.69335  
7.71033  
7.73044

6.7319  
6.7505

5.9833

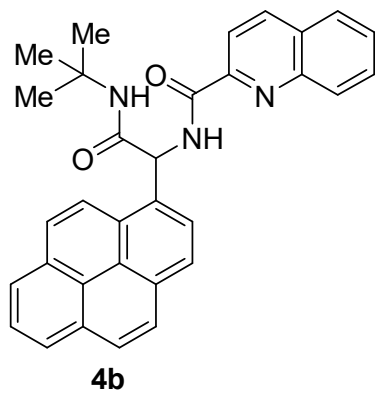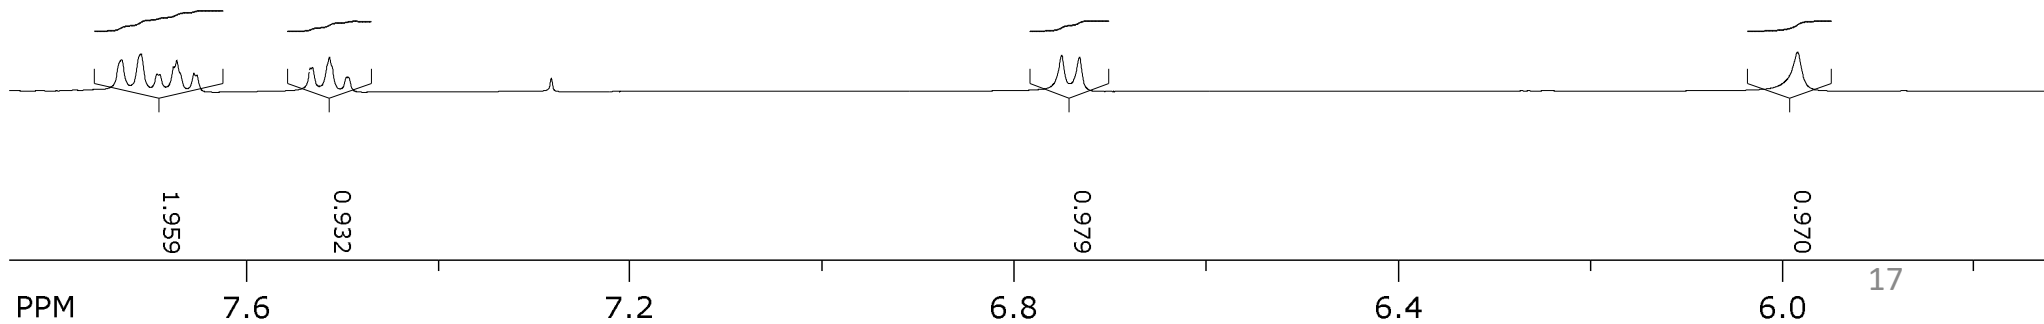

SpinWorks 4: AD 1872  
C13CPD256 CDCl3 /opt/topspin3.5pl2/nmrdata nmrsu 34



169.601 —  
164.153 —  
149.061 —  
146.400 —  
137.052 —  
131.584 —  
131.393 —  
131.045 —  
130.517 —  
129.901 —  
129.811 —  
129.099 —  
128.999 —  
128.900 —  
126.031 —  
125.481 —  
125.343 —  
125.156 —  
124.562 —  
122.557 —  
118.510 —  
76.742 —  
77.060 —  
77.378 —  
55.277 —  
51.877 —  
28.532 —

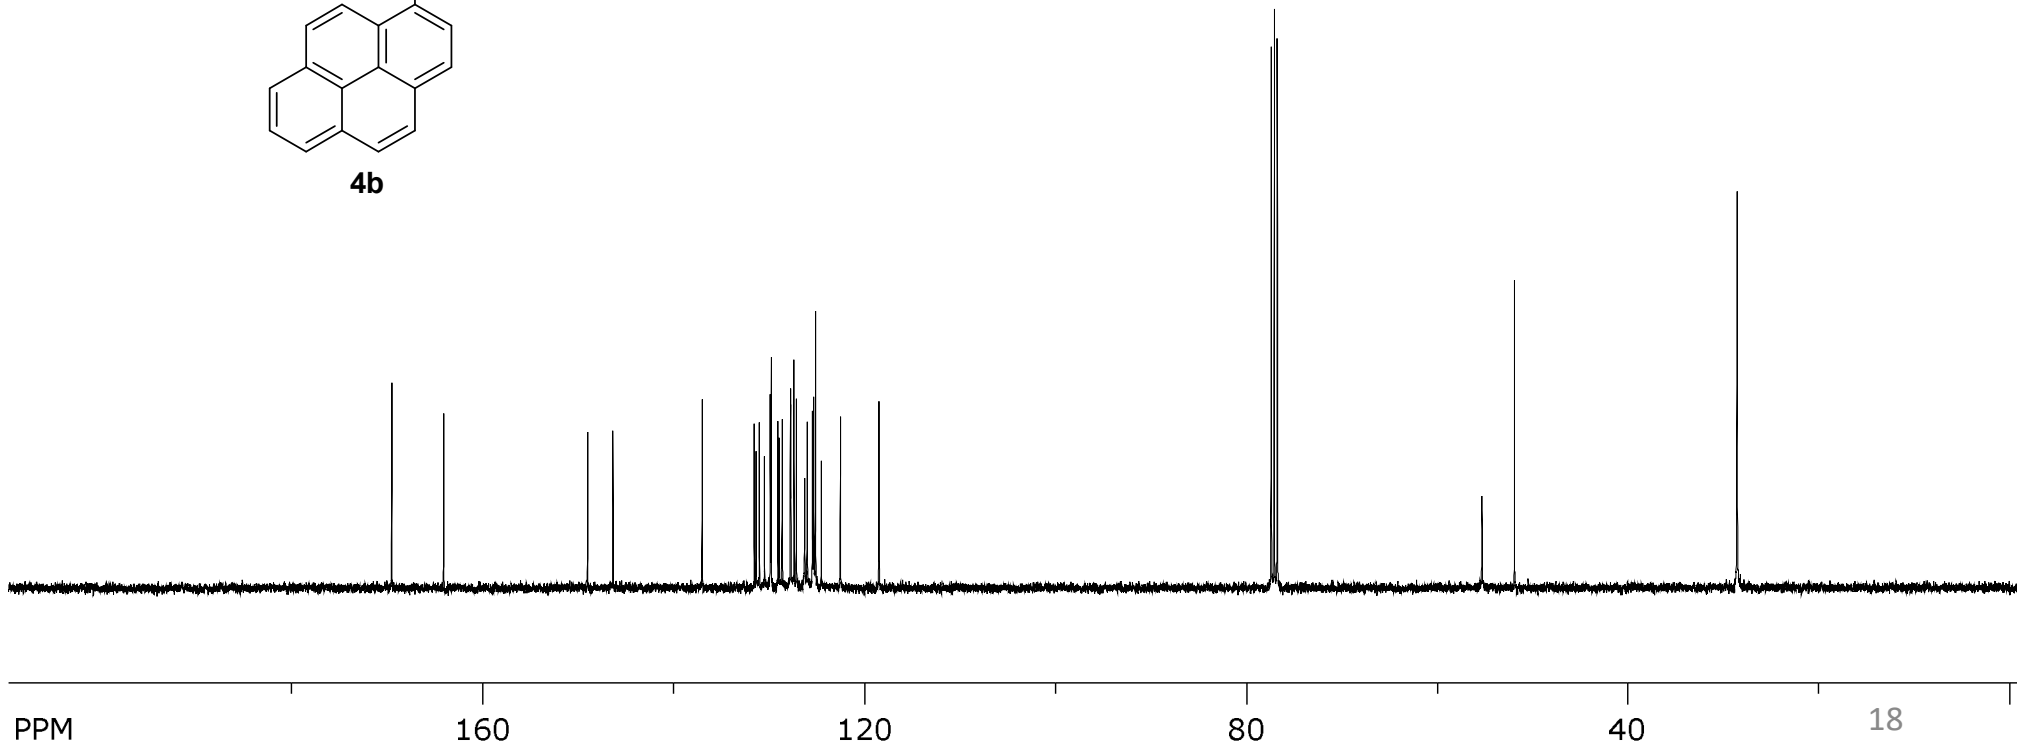

PPM

160

120

80

40

18

SpinWorks 4: AD 1872  
C13CPD256 CDCl3 /opt/topspin3.5pl2/nmrdata nmrsu 34

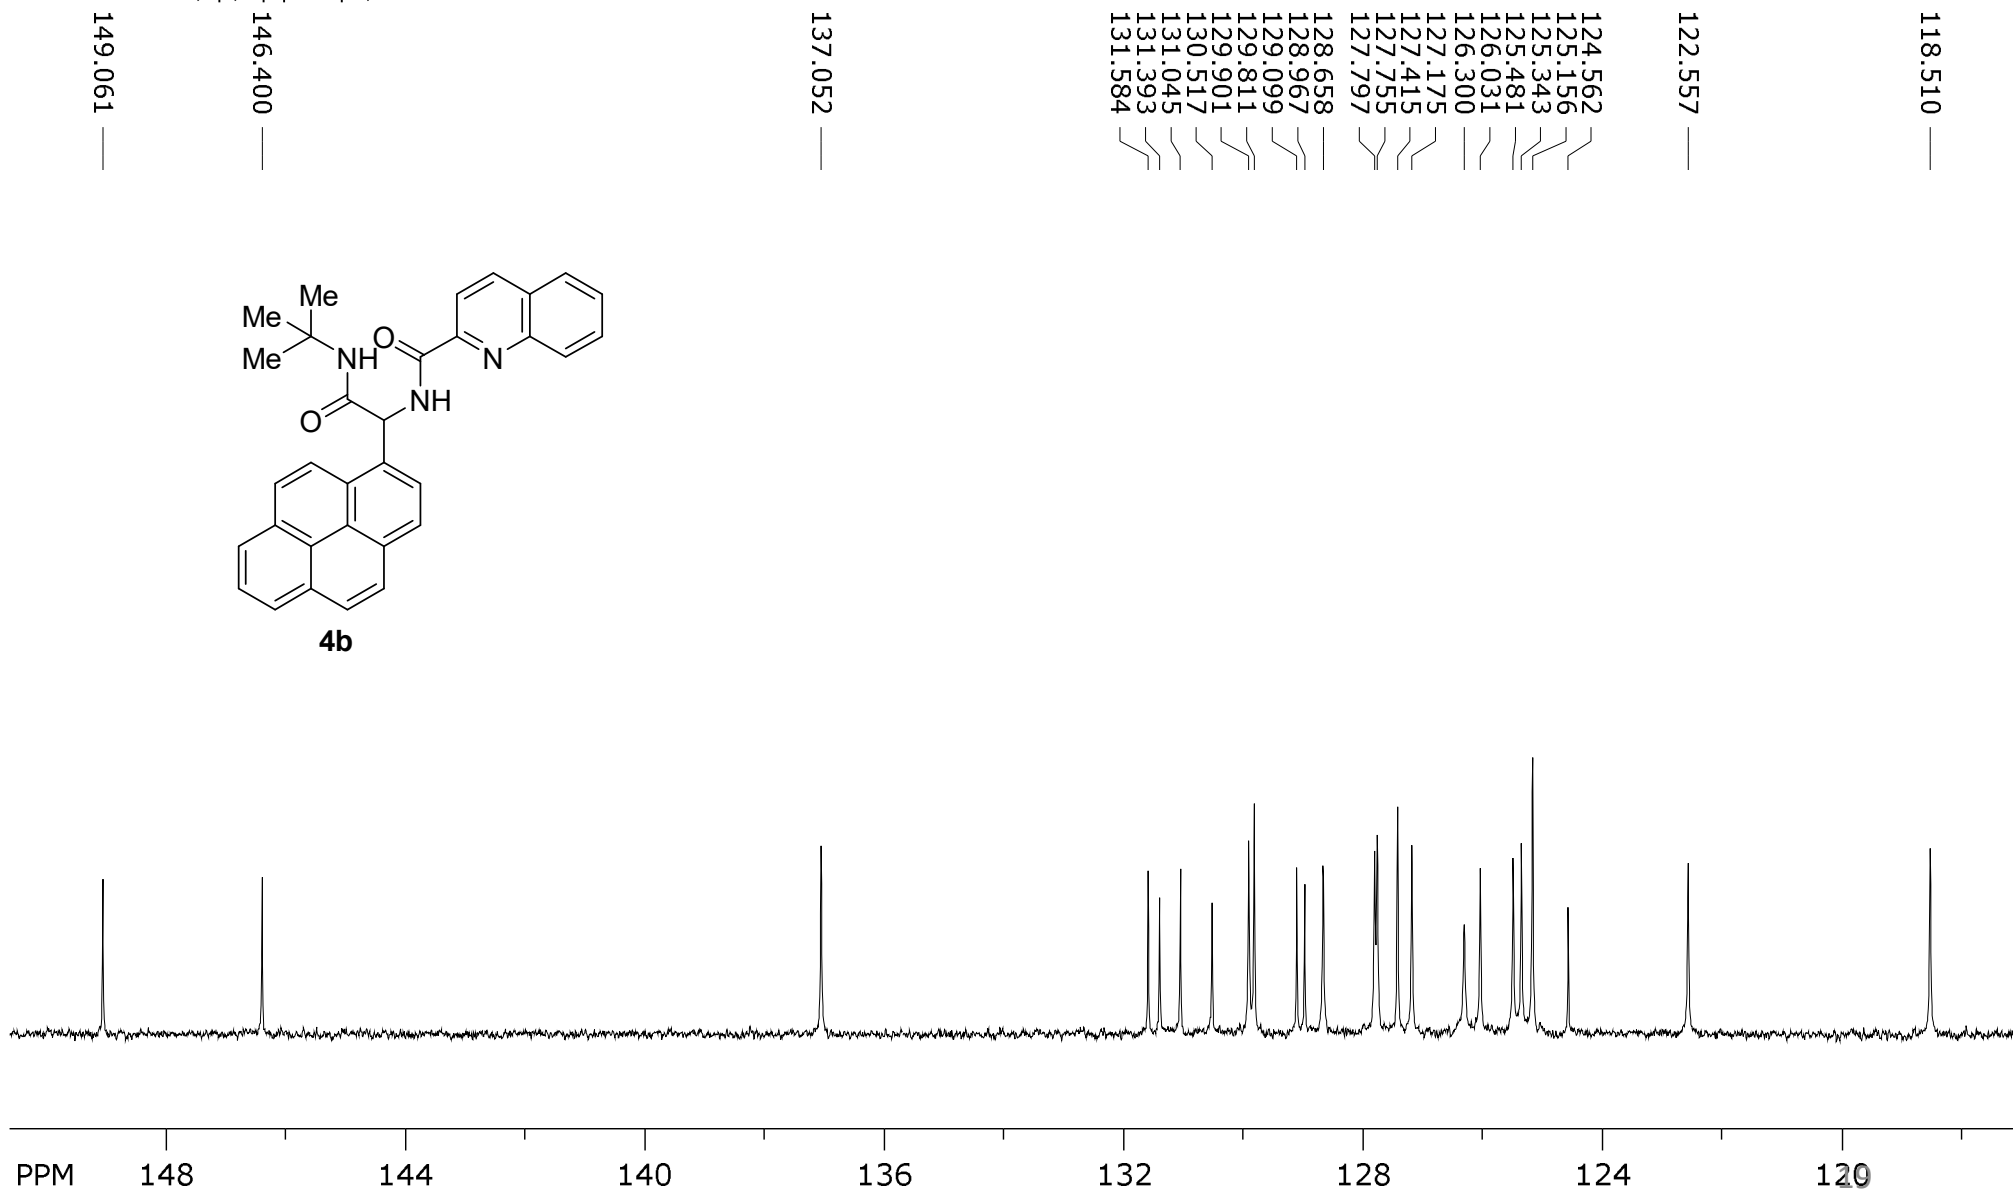

SpinWorks 4: AD 1875RE  
PROTON CDCl3 /opt/topspin3.5pl2/nmrdata nmrsu 4

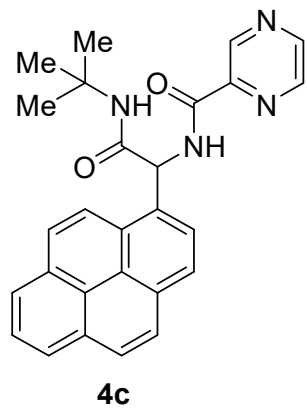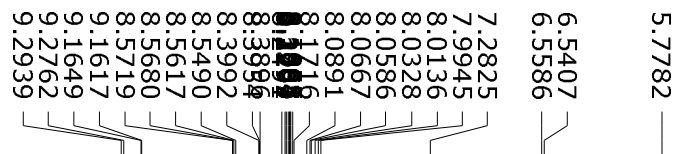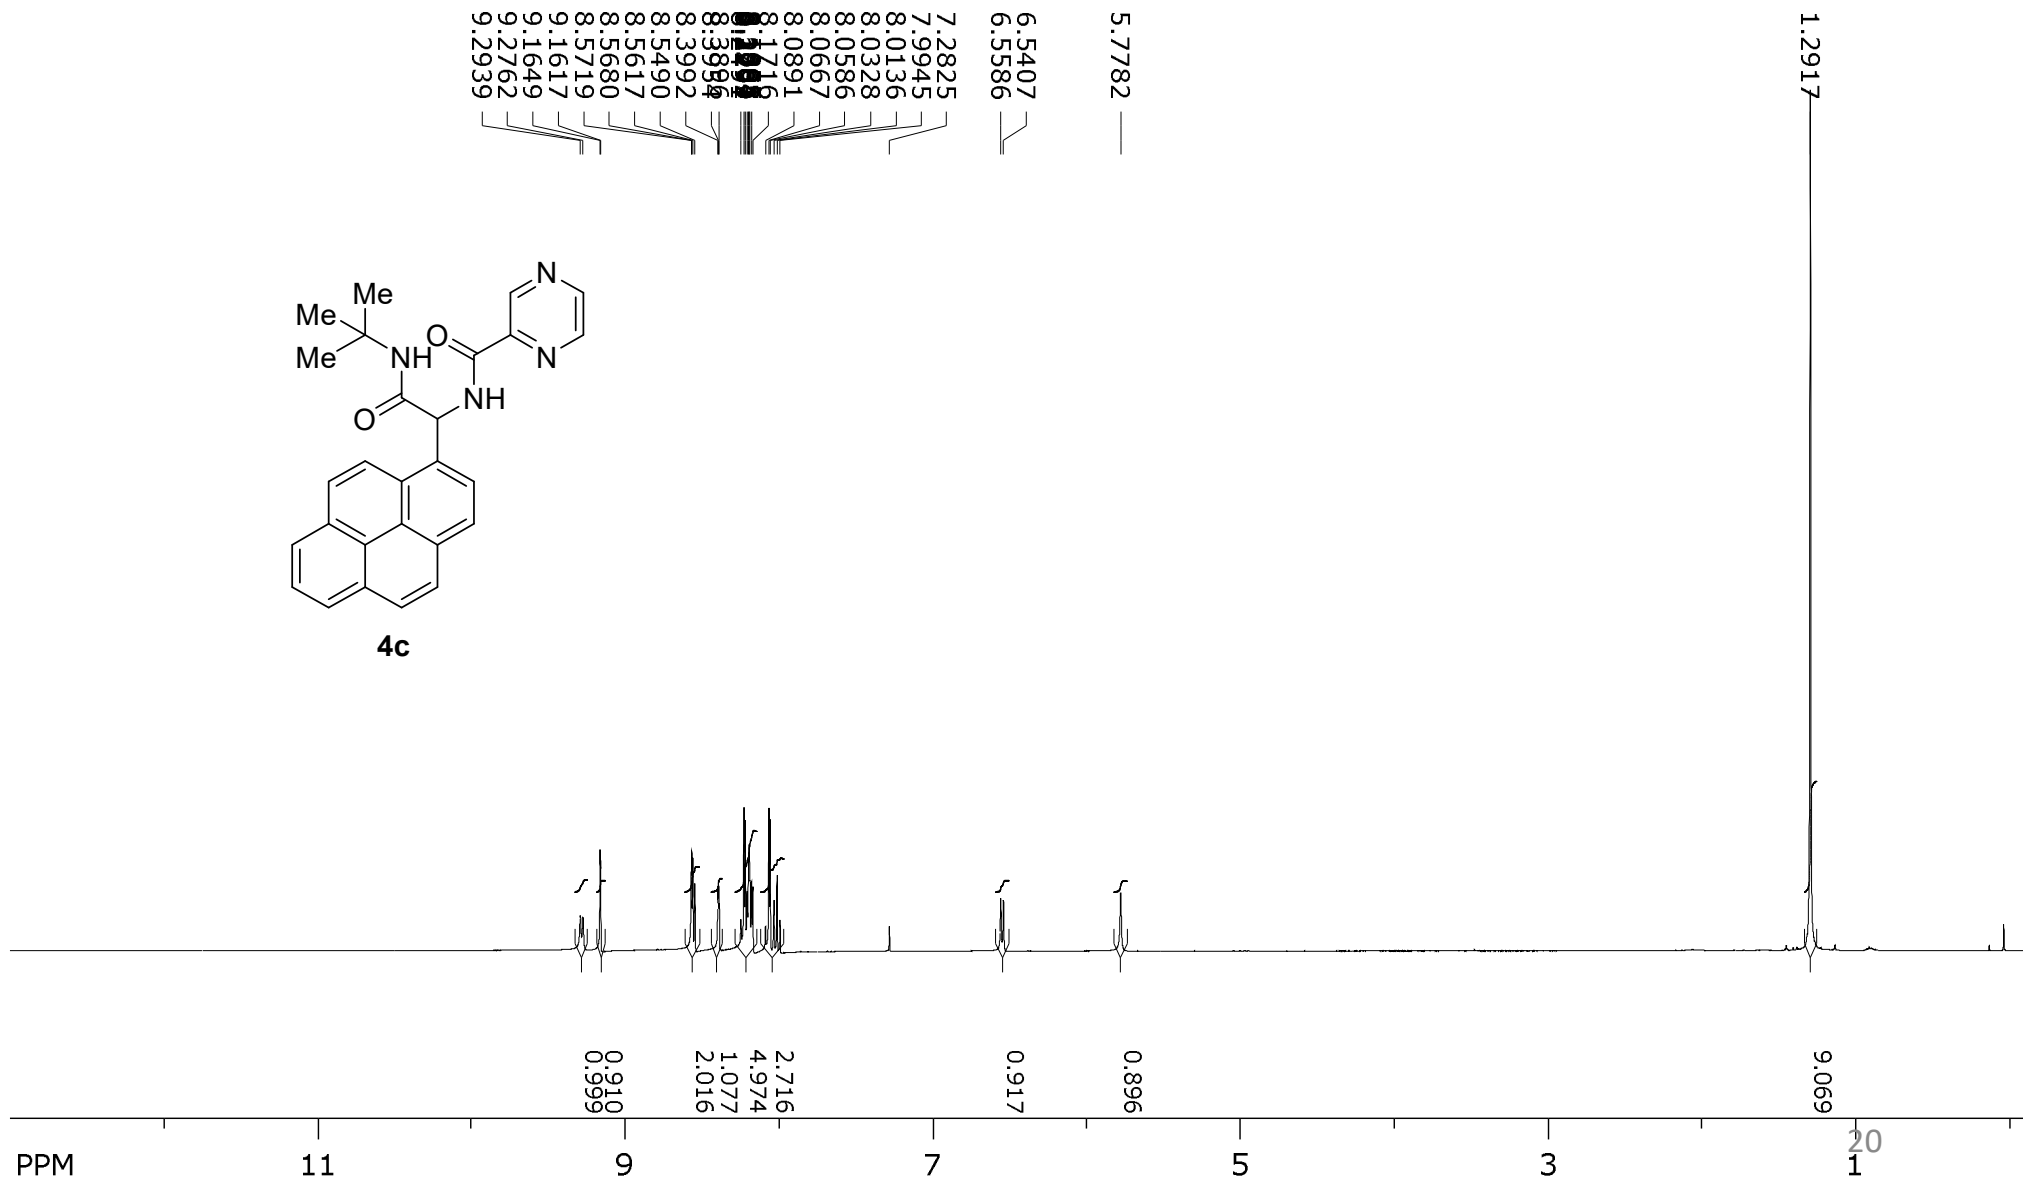

SpinWorks 4: AD 1875RE  
PROTON CDCl3 /opt/topspin3.5pl2/nmrdata nmrsu 4

9.2762  
9.2939

9.1617  
9.1649

8.5490  
8.5617  
8.5680  
8.5719

8.3896  
8.3954  
8.3992

7.9945  
8.0136  
8.0328  
8.0586  
8.0667  
8.0891  
8.1716  
8.1805  
8.1898  
8.1951  
8.1997  
8.2084  
8.2205  
8.2292  
8.2491

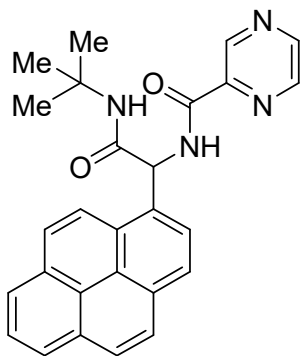

4c

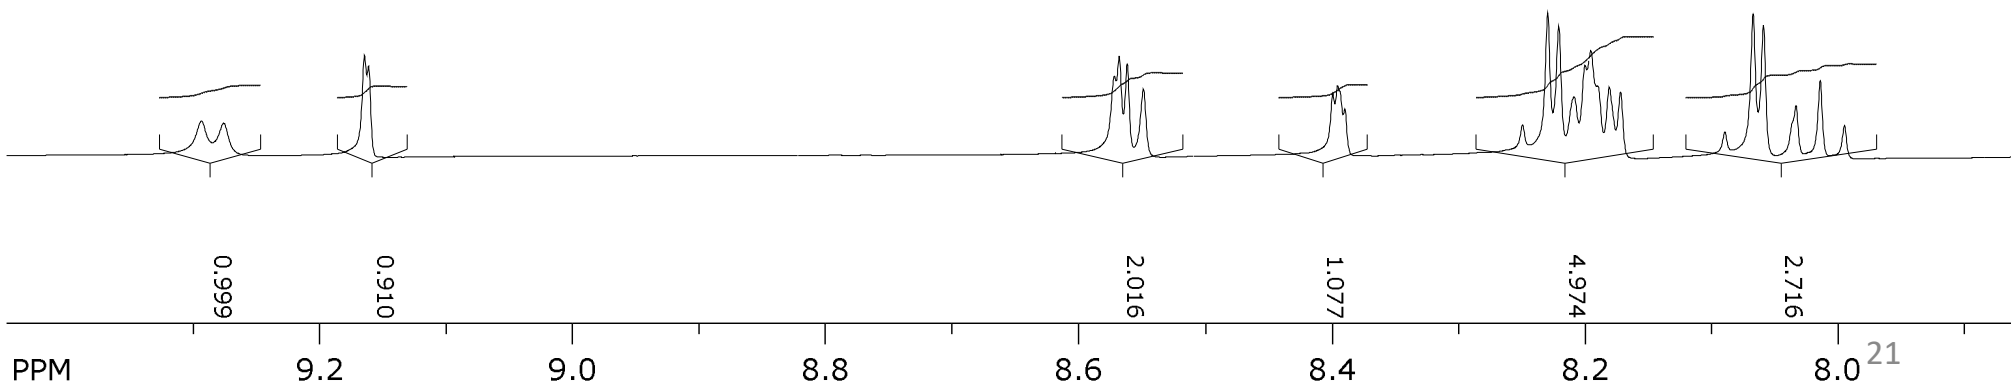

SpinWorks 4: AD 1875RE  
C13CPD CDCl3 /opt/topspin3.5pl2/nmrdata nmrsu 4

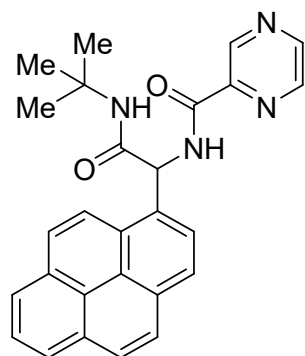

4c

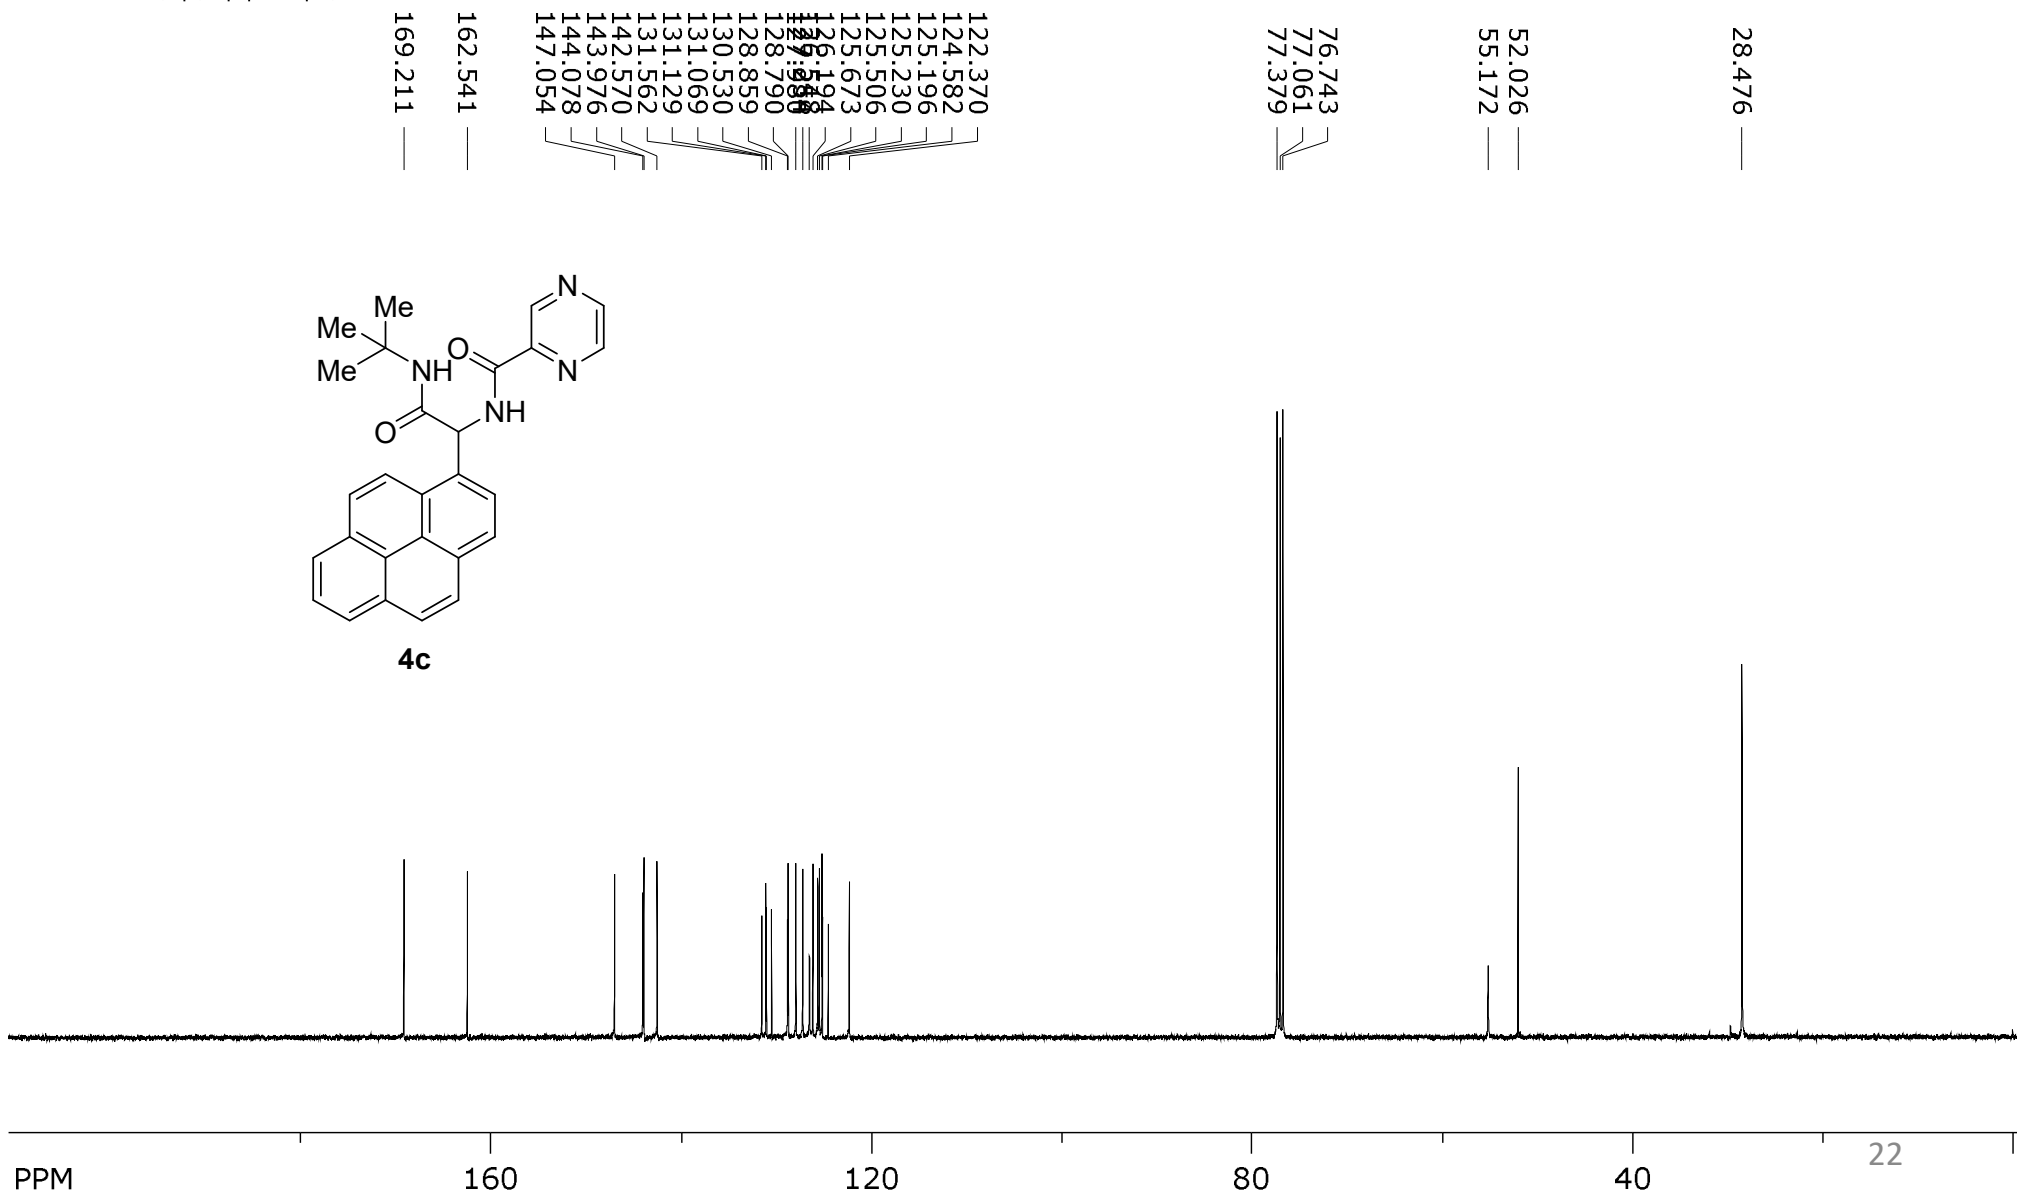

SpinWorks 4: AD 1875RE  
C13CPD CDCl3 /opt/topspin3.5pl2/nmrdata nmrsu 4

147.054 —  
143.976 —  
144.078 —  
142.570 —  
122.370 —  
124.582 —  
125.196 —  
125.230 —  
125.506 —  
125.673 —  
126.194 —  
126.548 —  
127.254 —  
127.980 —  
128.790 —  
128.859 —  
130.530 —  
131.069 —  
131.129 —  
131.562 —

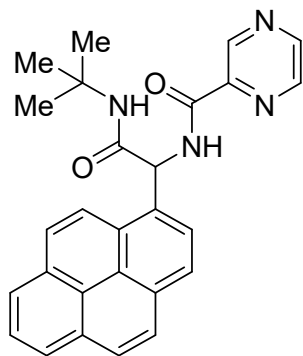

**4c**

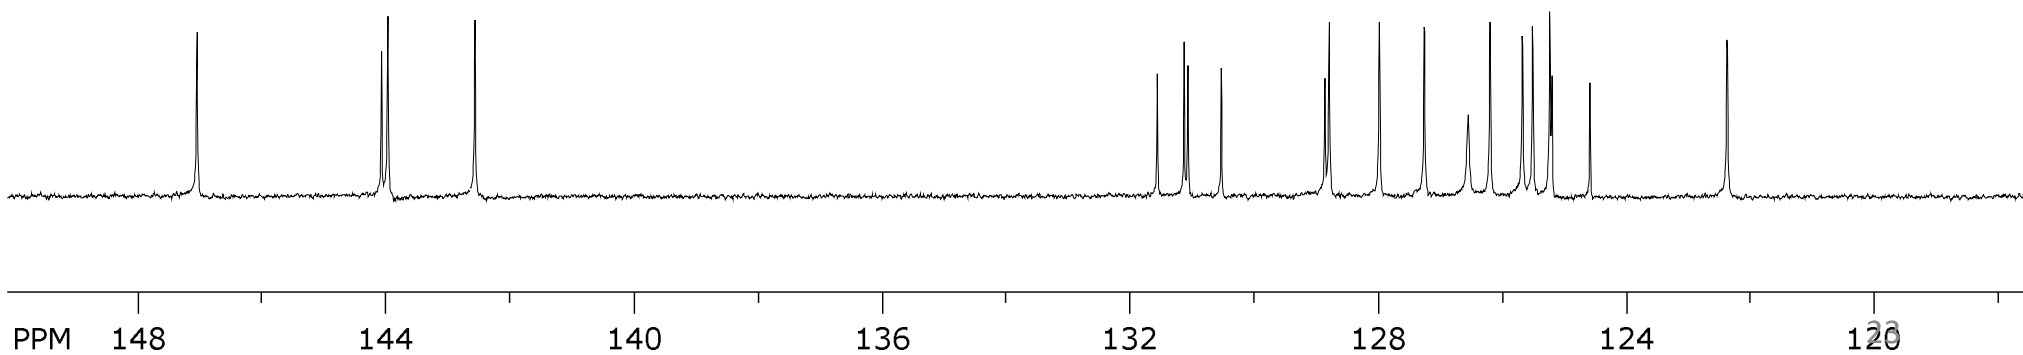

SpinWorks 4: AD-1873 RE  
PROTON CDCl3 /opt/topspin3.5pl2/nmrdata nmrsu 47

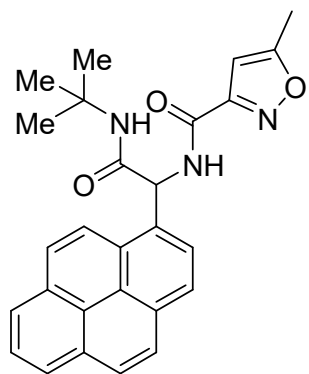

4d

7.2838  
8.0365  
8.0558  
8.0708  
8.0745  
8.0929  
8.1153  
8.1376  
8.1418  
8.2086  
8.2297  
8.2494  
8.3318  
8.3480  
8.4691  
8.4923

6.3425  
6.4108  
6.4274

5.3794

2.4260

1.2589

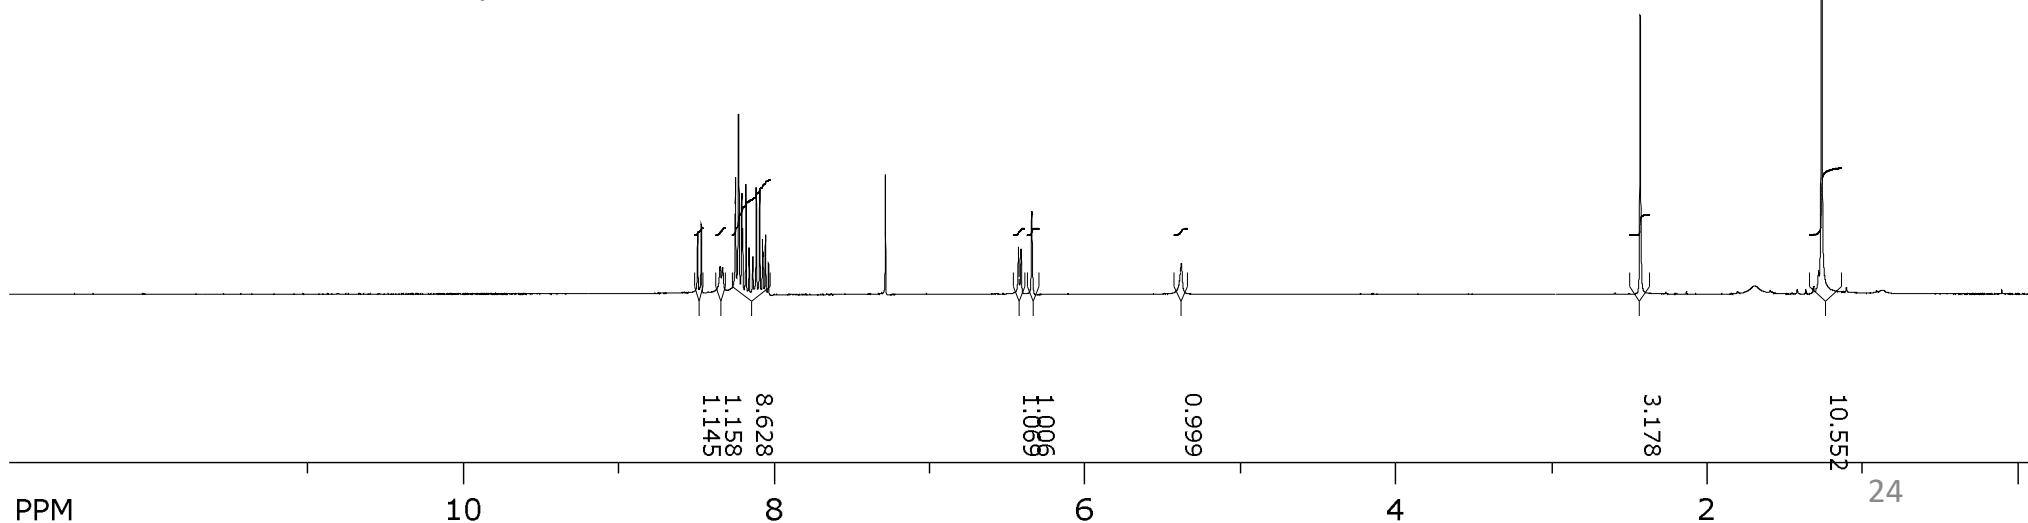



SpinWorks 4: AD-1873 RE  
PROTON CDCl3 /opt/topspin3.5pl2/nmrdata nmrsu 47

8.0365  
8.0558  
8.0708  
8.0745  
8.0929  
8.1153  
8.1376  
8.1612  
8.1811  
8.2028  
8.2086  
8.2297  
8.2494  
8.3318  
8.3480  
8.4691  
8.4923

7.2838

6.3425  
6.4108  
6.4274

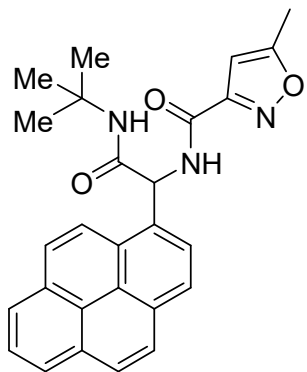

4d

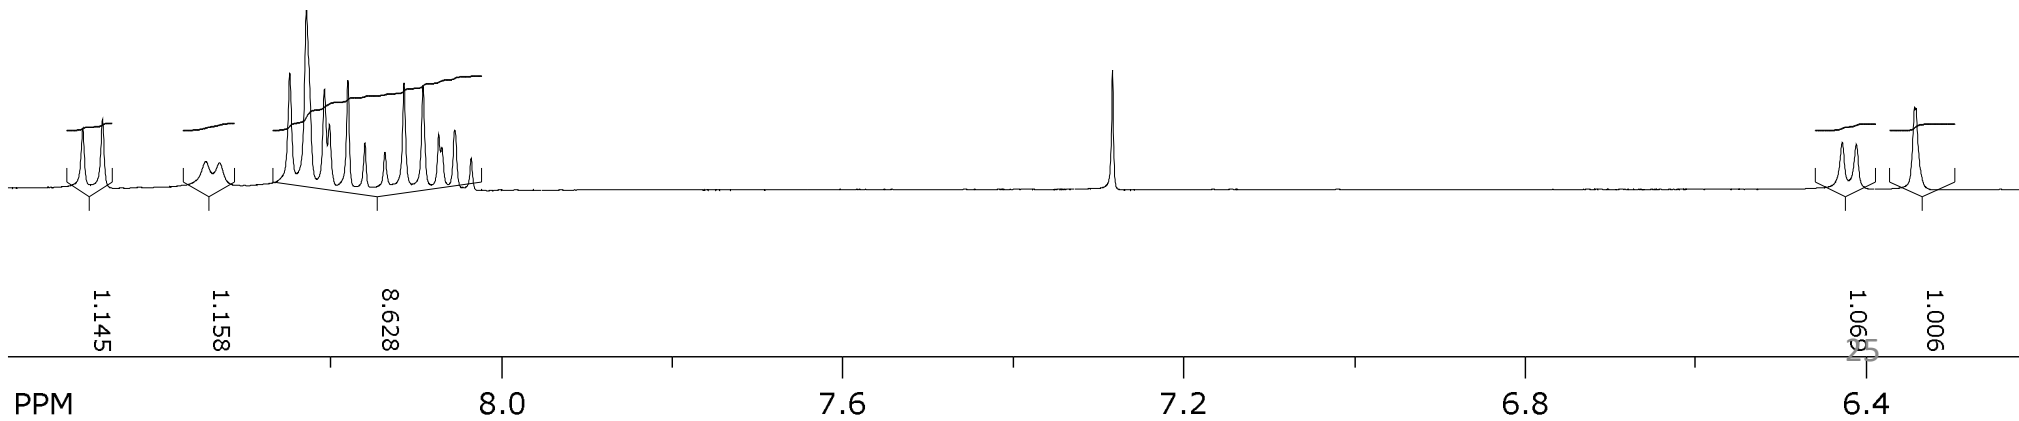

SpinWorks 4: AD-1873 RE  
C13CPD256 CDCl3 /opt/topspin3.5pl2/nmrdata nmrsu 47

168.826  
171.049  
158.321  
158.842

122.288  
124.713  
125.280  
125.306  
125.585  
125.762  
126.266  
129.595  
128.074  
128.841  
128.898  
130.633  
130.800  
131.223  
131.673

101.313

76.724  
77.042  
77.359

52.055  
55.379

28.492

12.320

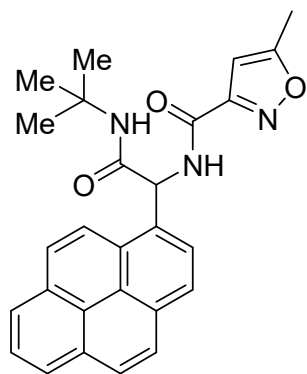

4d

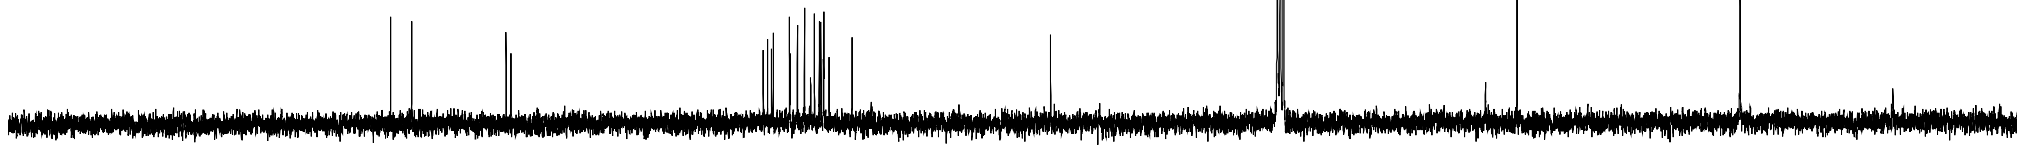

PPM

160

120

80

40

SpinWorks 4: AD-1873 RE  
C13CPD256 CDCl3 /opt/topspin3.5pl2/nmrdata nmrsu 47

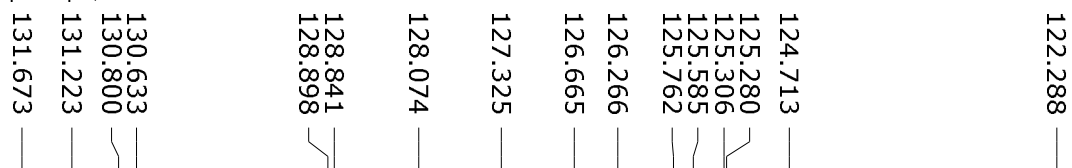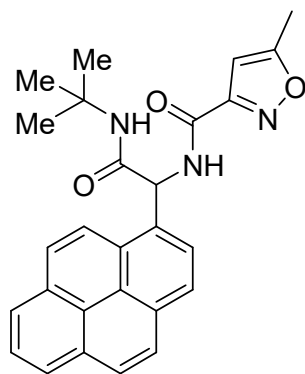

4d

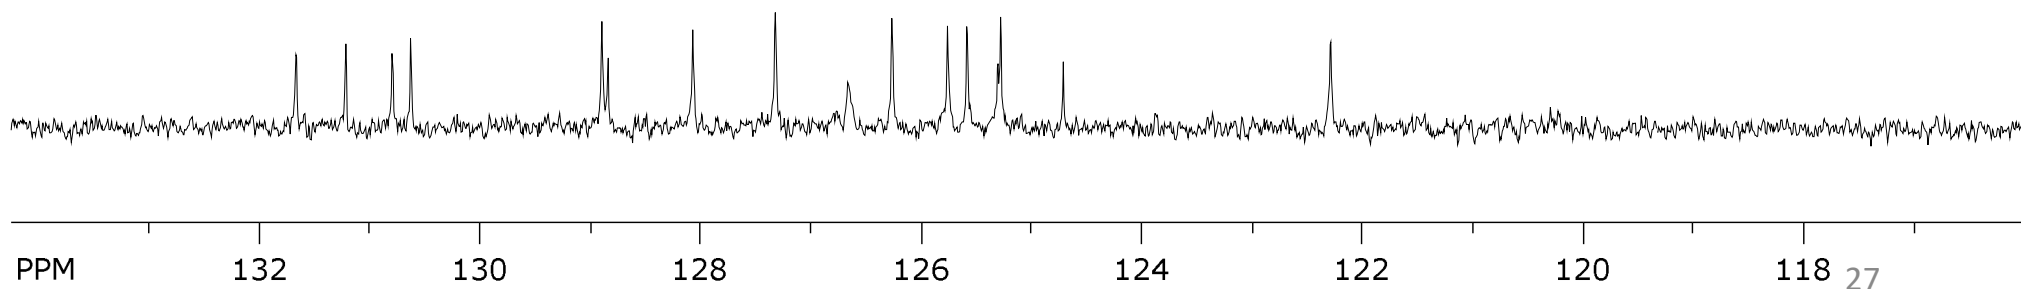



SpinWorks 4: AD 2267 RE  
PROTON CDCl3 /opt/topspin3.5pl2/nmrdata nmrsu 51

9.4369  
9.4546

8.5938  
8.6134

8.5162  
8.5270

8.3931

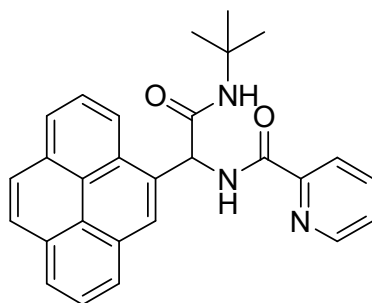

**4e**

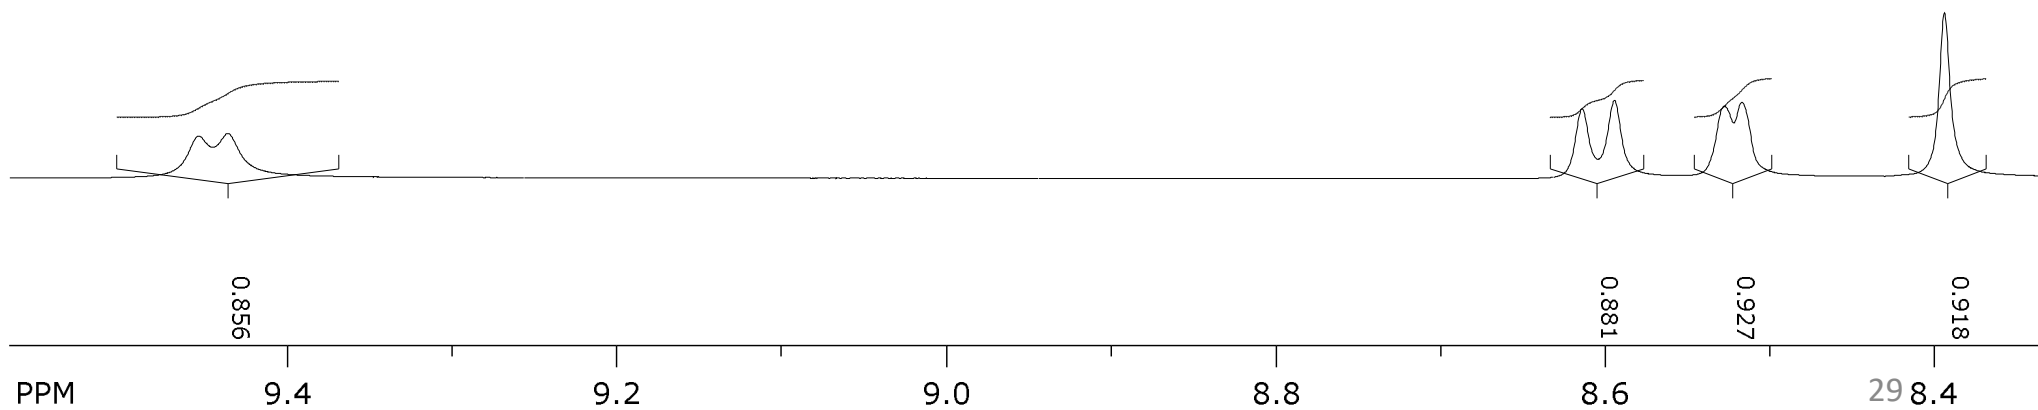

SpinWorks 4: AD 2267 RE  
PROTON CDCl3 /opt/topspin3.5pl2/nmrdata nmrsu 51

8.1889  
8.2011  
8.2065  
8.2216  
8.2430

8.0934  
8.0536  
8.0654  
8.0110  
8.0302

7.6842  
7.7032  
7.7186  
7.7221

7.2829  
7.3098  
7.3276  
7.3382

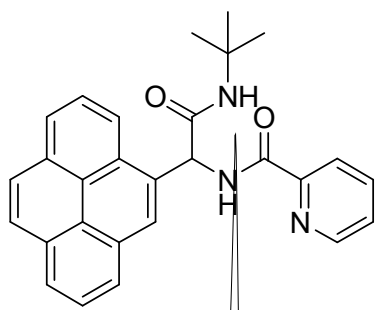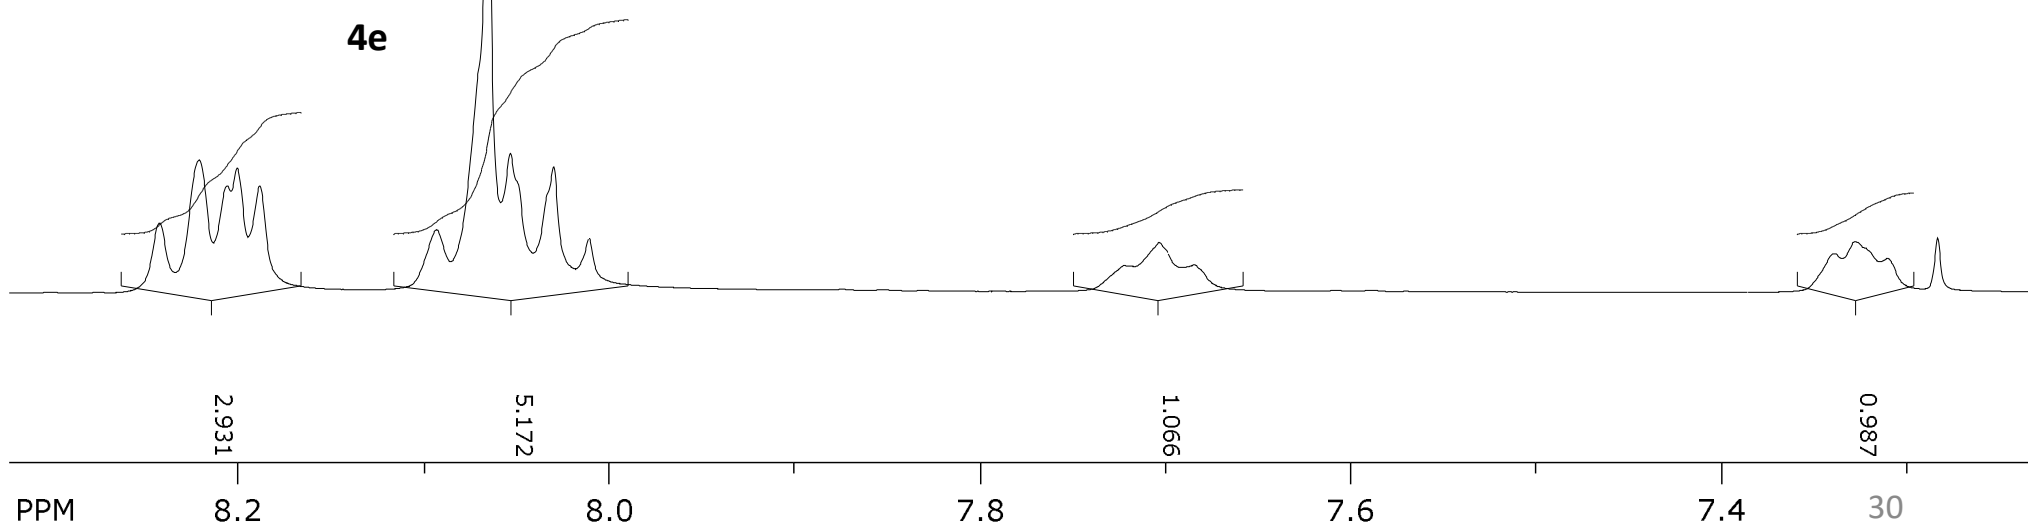

SpinWorks 4: AD 2267 RE  
PROTON CDCl3 /opt/topspin3.5pl2/nmrdata nmrsu 51

6.4428  
6.4609

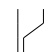

5.9122

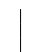

**4e**

1.3034

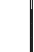

8.758

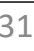

PPM

6.0

5.0

4.0

3.0

2.0

31

1.0

1.000

1.003

8.758

SpinWorks 4: AD 2267 RE  
C13CPD256 CDCl3 /opt/topspin3.5pl2/nmrdata nmrsu 51

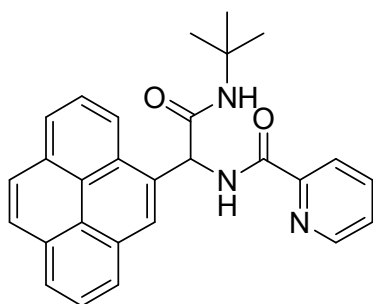

4e

121.306  
122.084  
124.422  
125.427  
125.606  
125.707  
125.764  
125.788  
125.799  
128.868  
129.231  
130.256  
130.884  
131.627  
133.159  
137.029  
148.240  
149.351  
164.183  
169.320

76.742  
77.060  
77.378

51.889  
56.277

28.486

PPM 160 120 80 40 0 32



SpinWorks 4: AD 2267 RE  
C13CPD256 CDCl3 /opt/topspin3.5pl2/nmrdata nmrsu 51

169.320 —  
164.183 —  
148.240 —  
149.351 —  
137.029 —  
121.306 —  
122.084 —  
124.422 —  
125.427 —  
125.606 —  
125.707 —  
125.764 —  
126.146 —  
126.183 —  
126.245 —  
127.208 —  
127.659 —  
128.868 —  
129.231 —  
130.256 —  
130.884 —  
131.627 —  
133.159 —

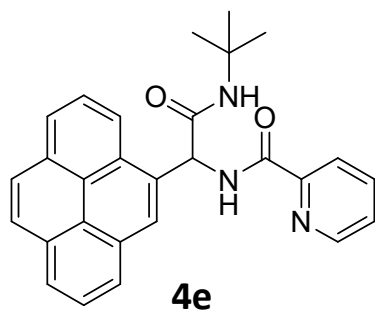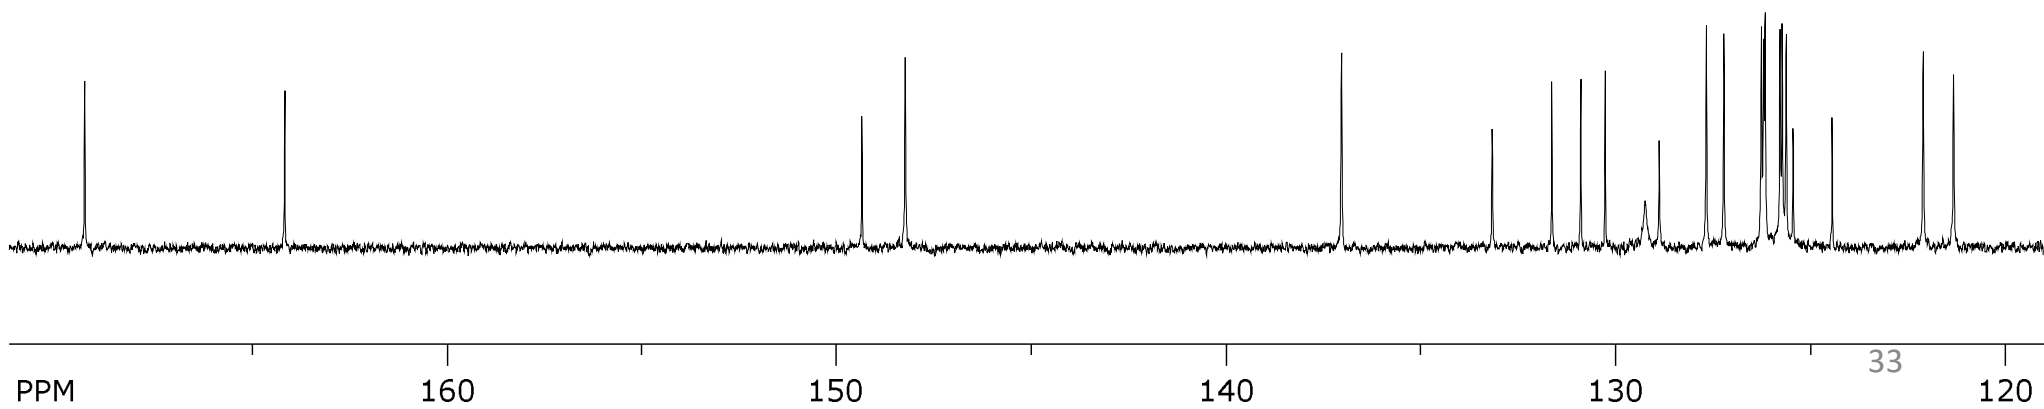

SpinWorks 4: AD 2267 RE  
C13CPD256 CDCl3 /opt/topspin3.5pl2/nmrdata nmrsu 51

56.277

51.889

28.486

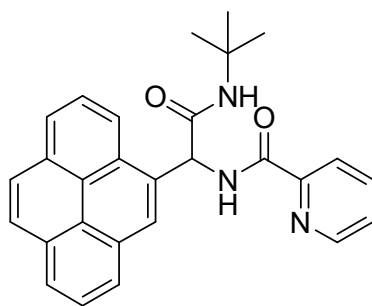

**4e**

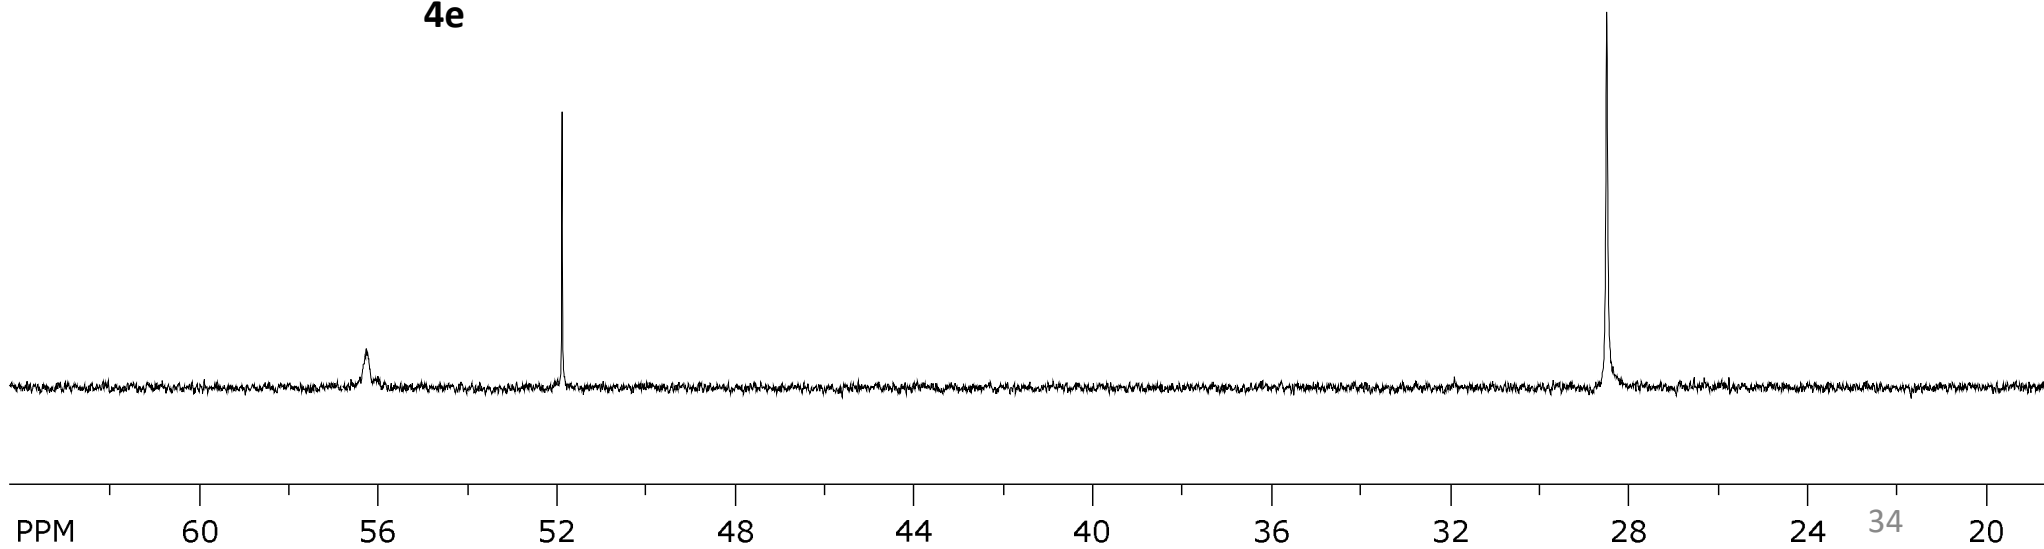

SpinWorks 4: SUB 62  
PROTON CDCl3 /opt/topspin3.5pl2/nmrdata nmrsu 55

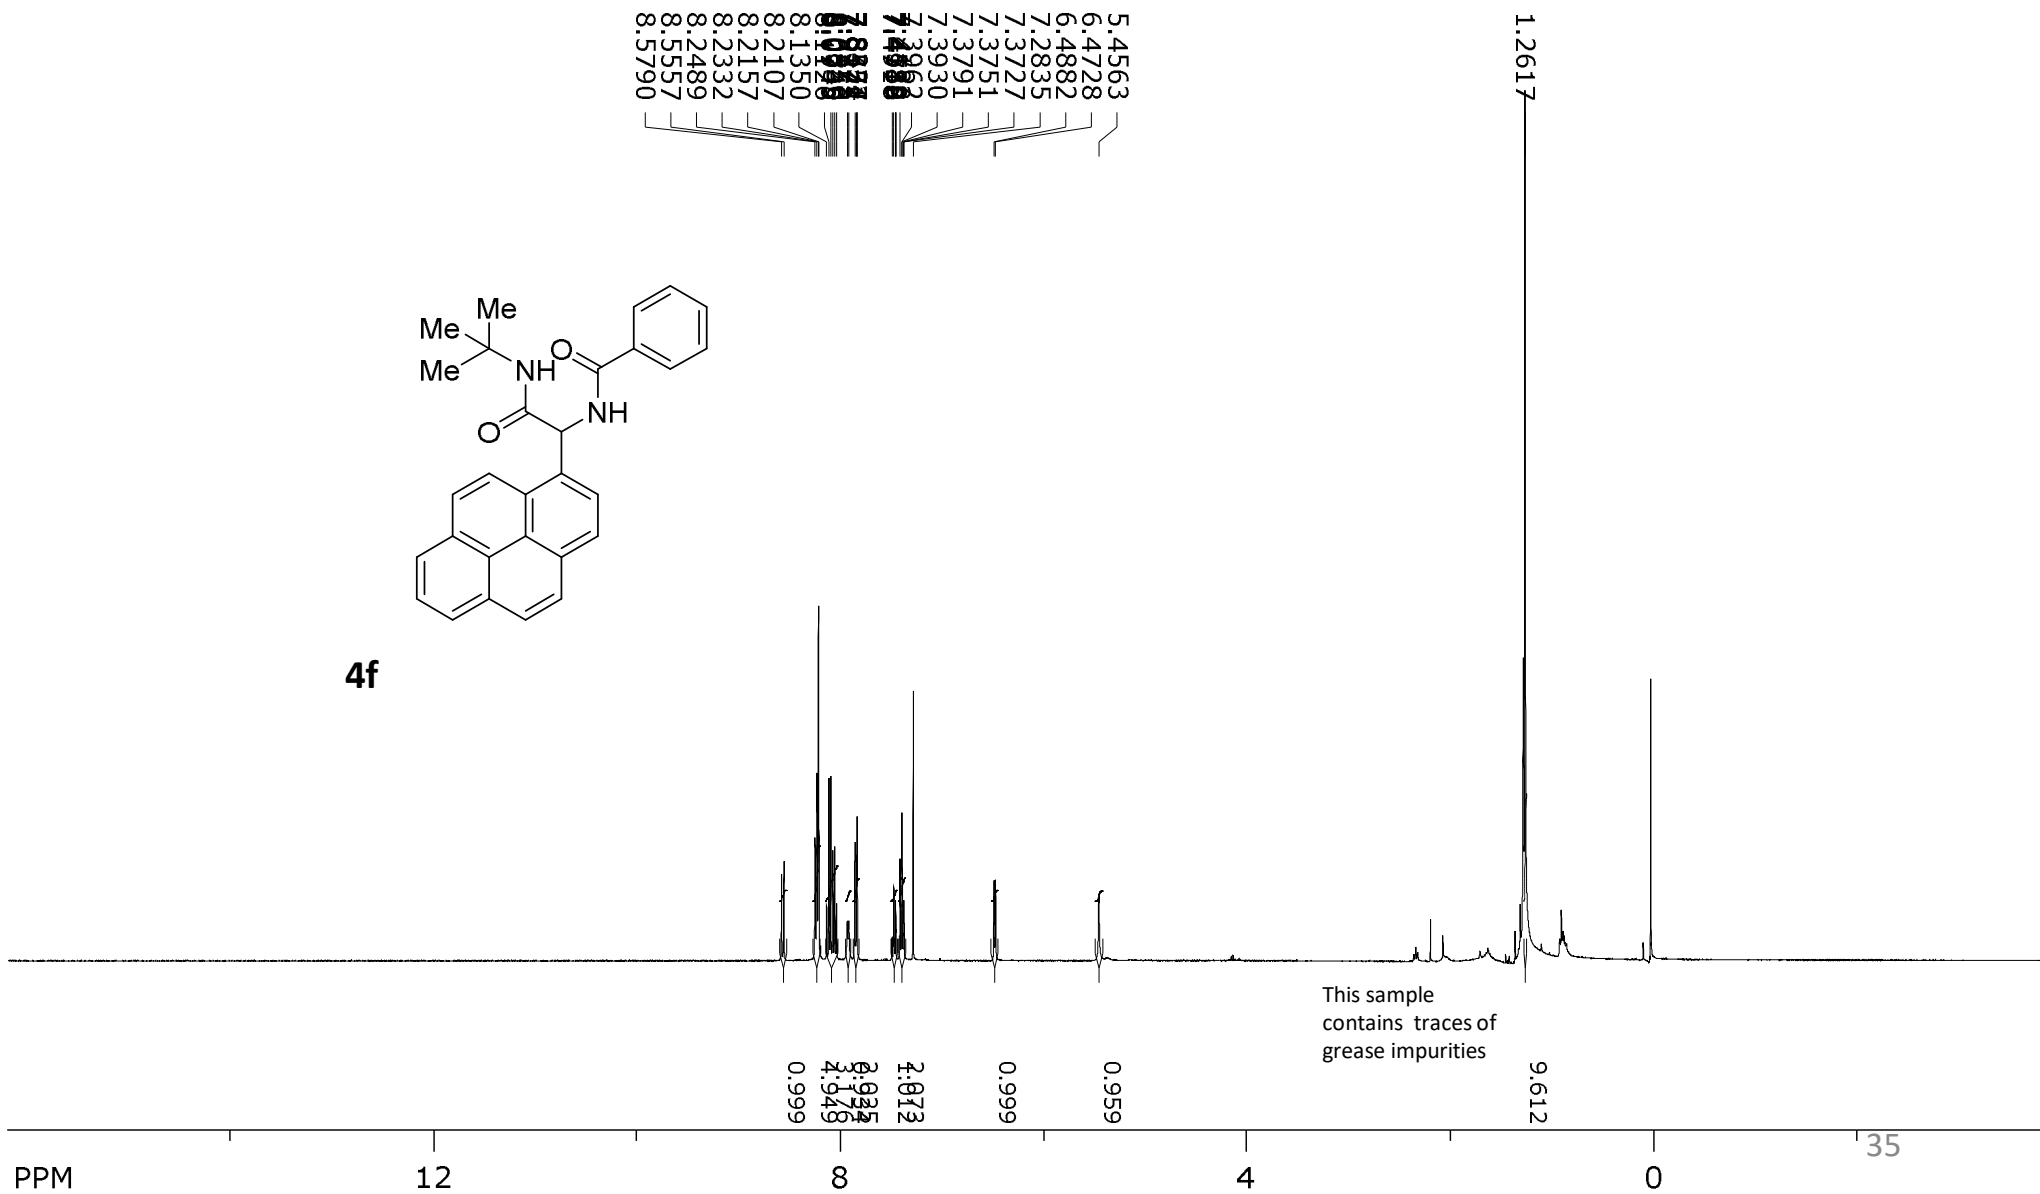

SpinWorks 4: SUB 62  
PROTON CDCl3 /opt/topspin3.5pl2/nmrdata nmrsu 55

8.5790 —  
8.5557 —

8.2489 —  
8.2157 —  
8.2107 —

8.1350 —  
8.1126 —  
8.0945 —  
8.0735 —  
8.0549 —  
8.0356 —

7.9325 —  
7.9173 —

7.8337 —  
7.8374 —  
7.8422 —  
7.8551 —

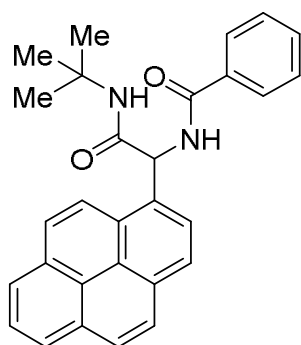

4f

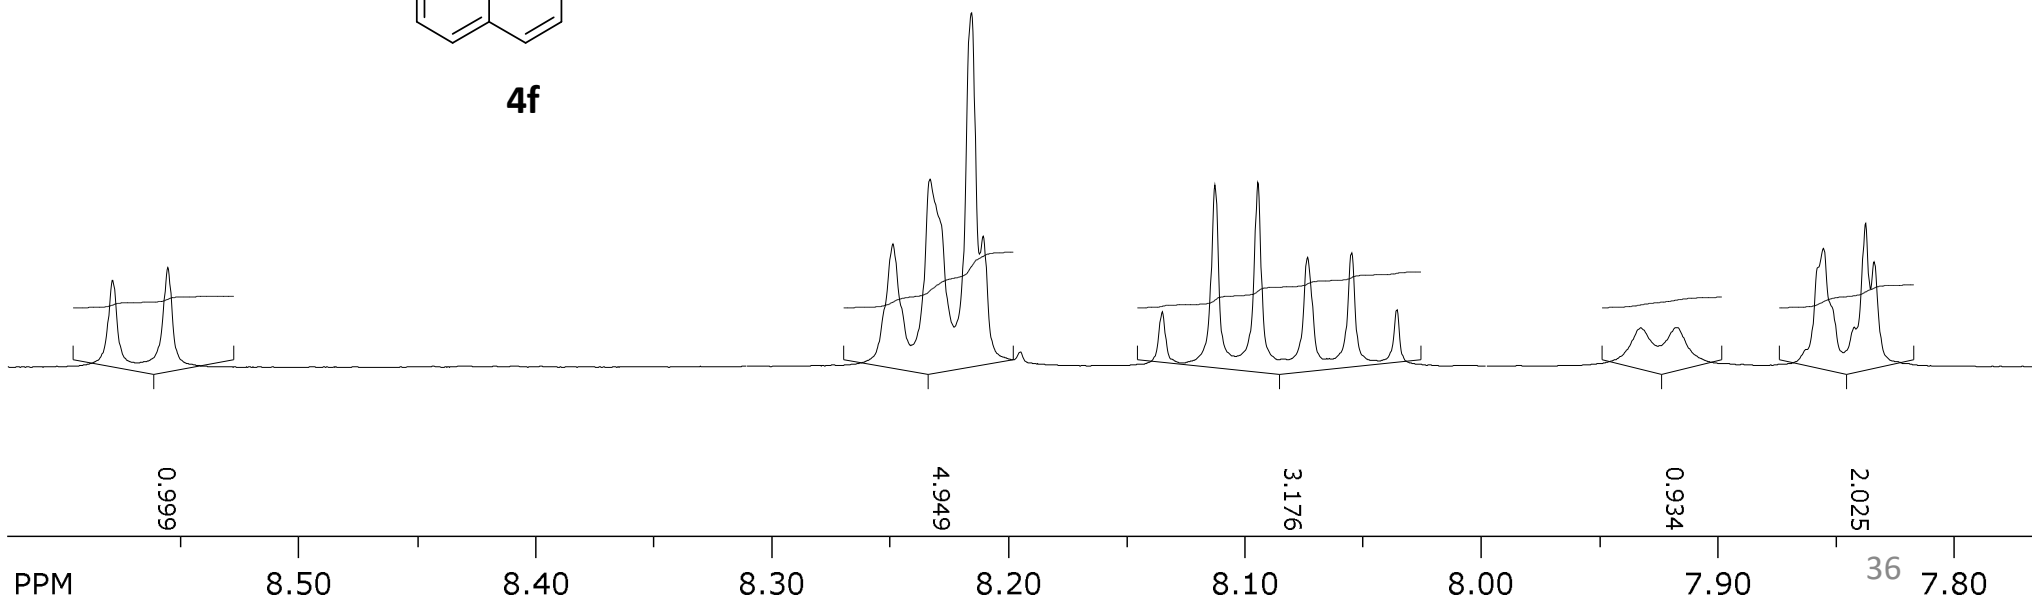

SpinWorks 4: SUB 62  
PROTON CDCl3 /opt/topspin3.5pl2/nmrdata nmrsu 55

7.4518 —  
7.4550 —  
7.4582 —  
7.4735 —  
7.4918 —  
  
7.4123 —  
7.3930 —  
7.3962 —  
7.3727 —  
7.3751 —  
7.3791 —  
  
7.2835 —

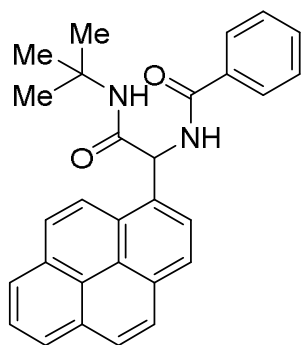

**4f**

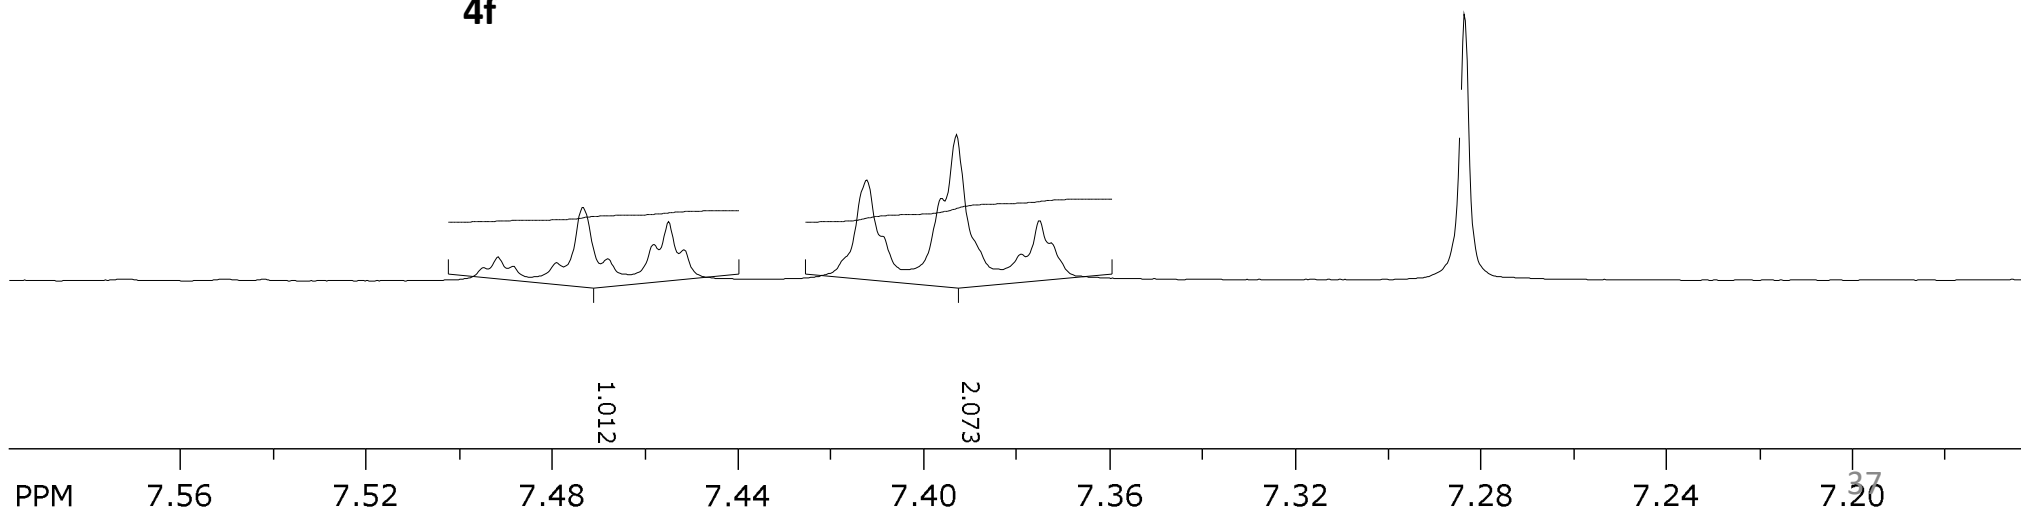

SpinWorks 4: SUB 62  
PROTON CDCl3 /opt/topspin3.5pl2/nmrdata nmrsu 55

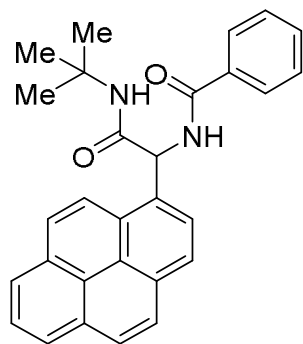

**4f**

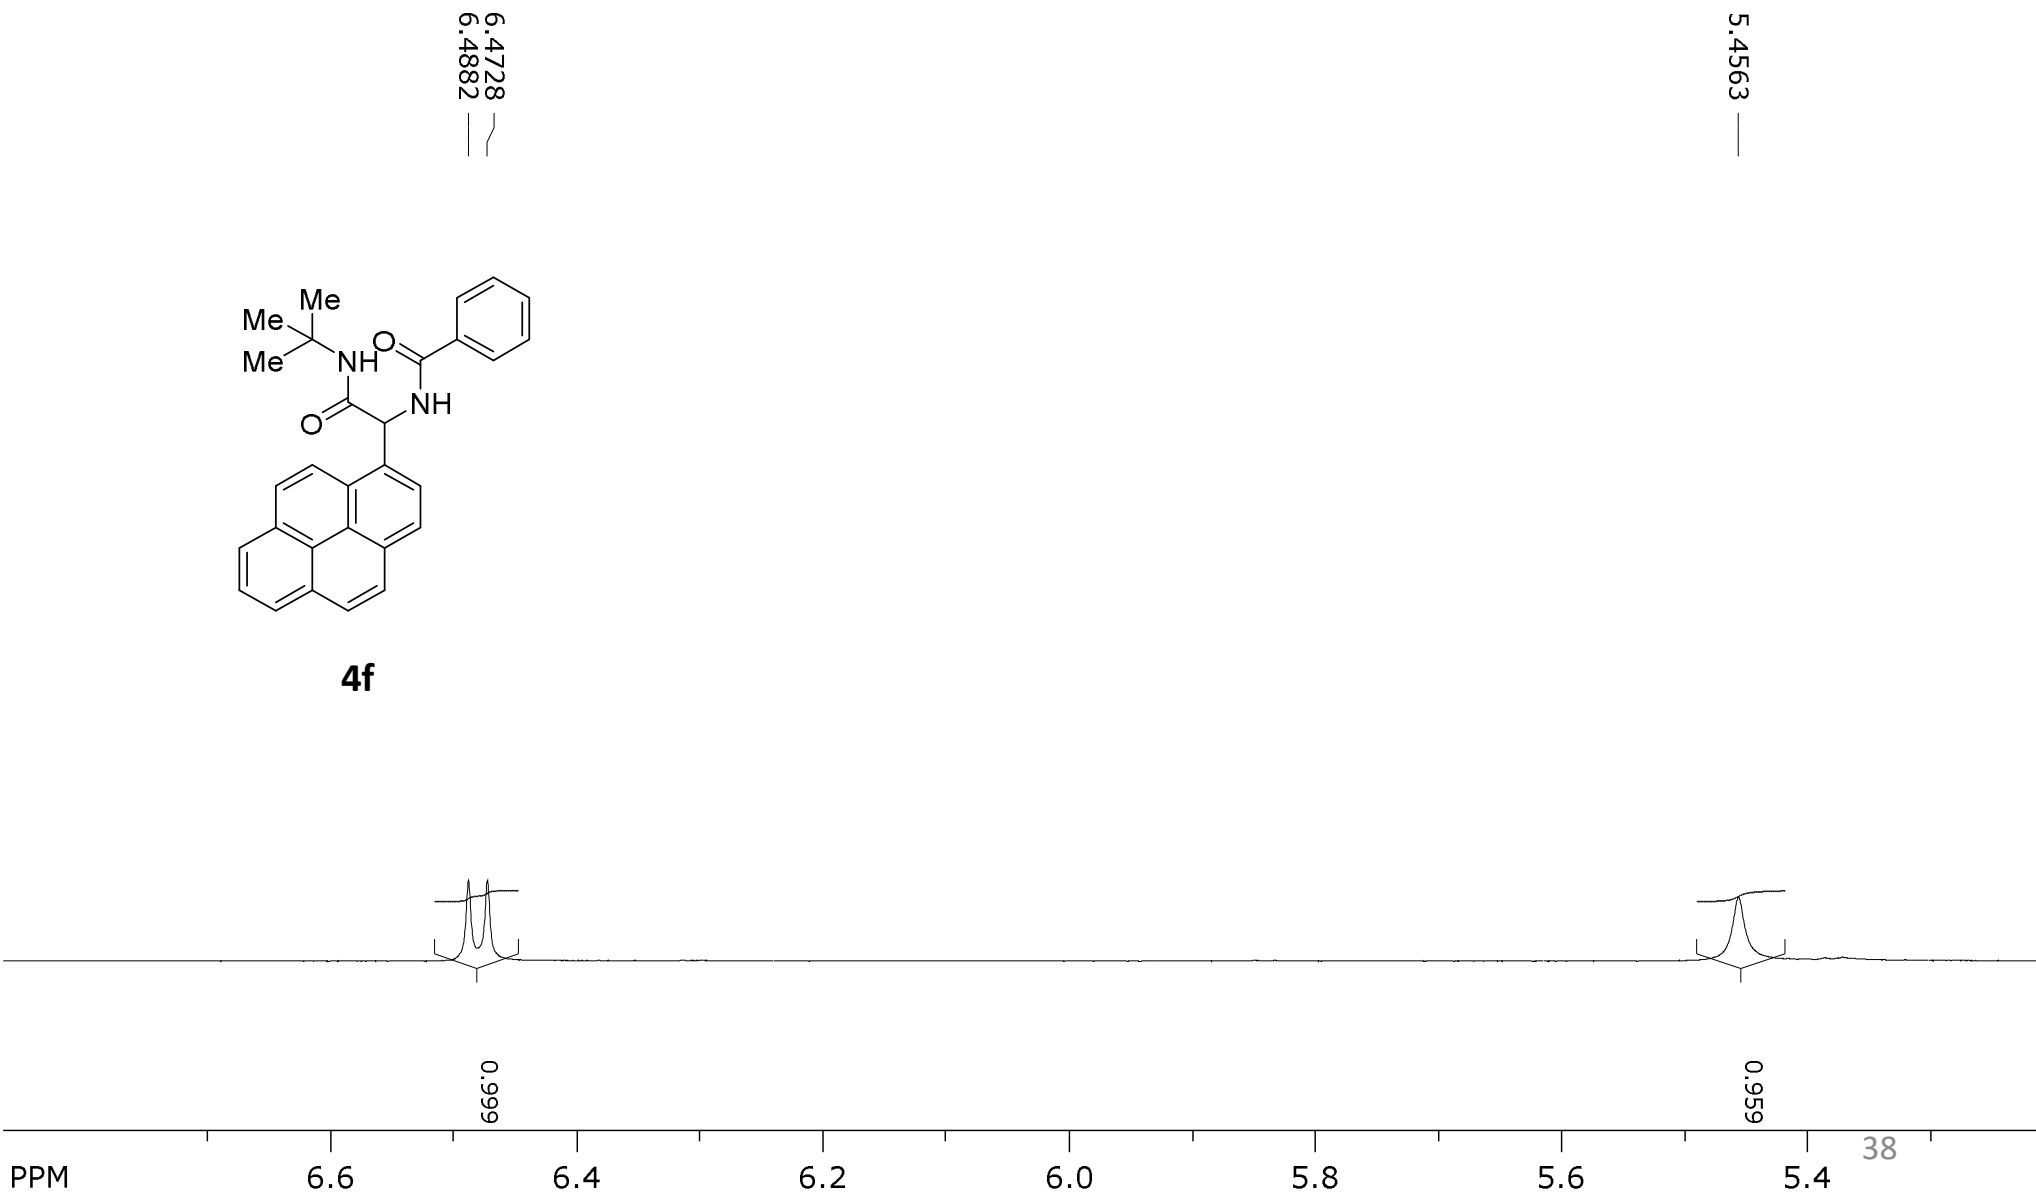

SpinWorks 4: SUB 62  
PROTON CDCl3 /opt/topspin3.5pl2/nmrdata nmrsu 55



**4f**

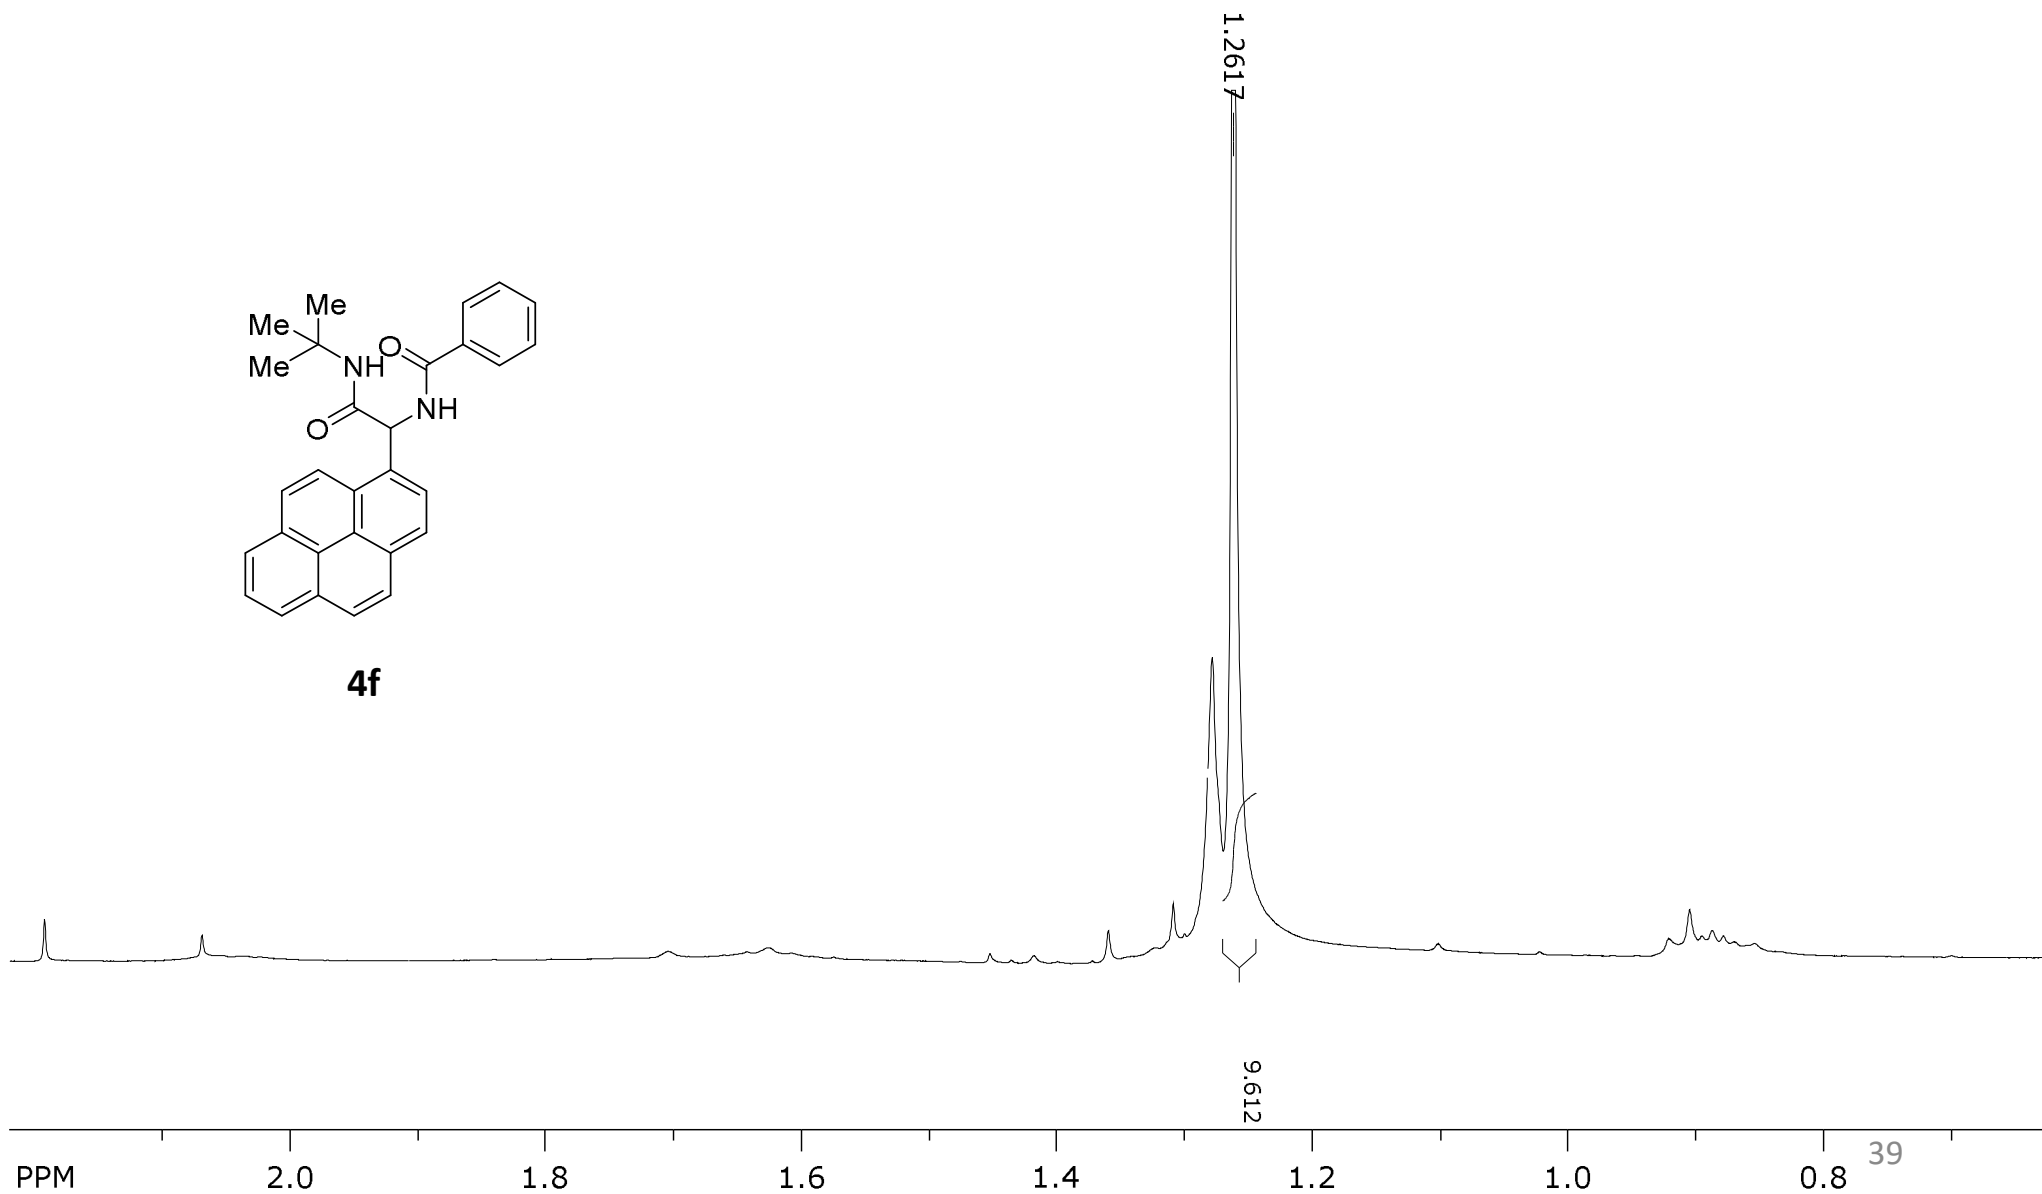

SpinWorks 4: SUB 62  
C13CPD CDCl3 /opt/topspin3.5pl2/nmrdata nmrsu 55

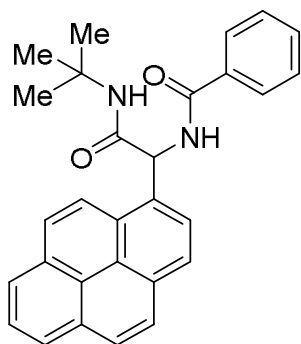

4f

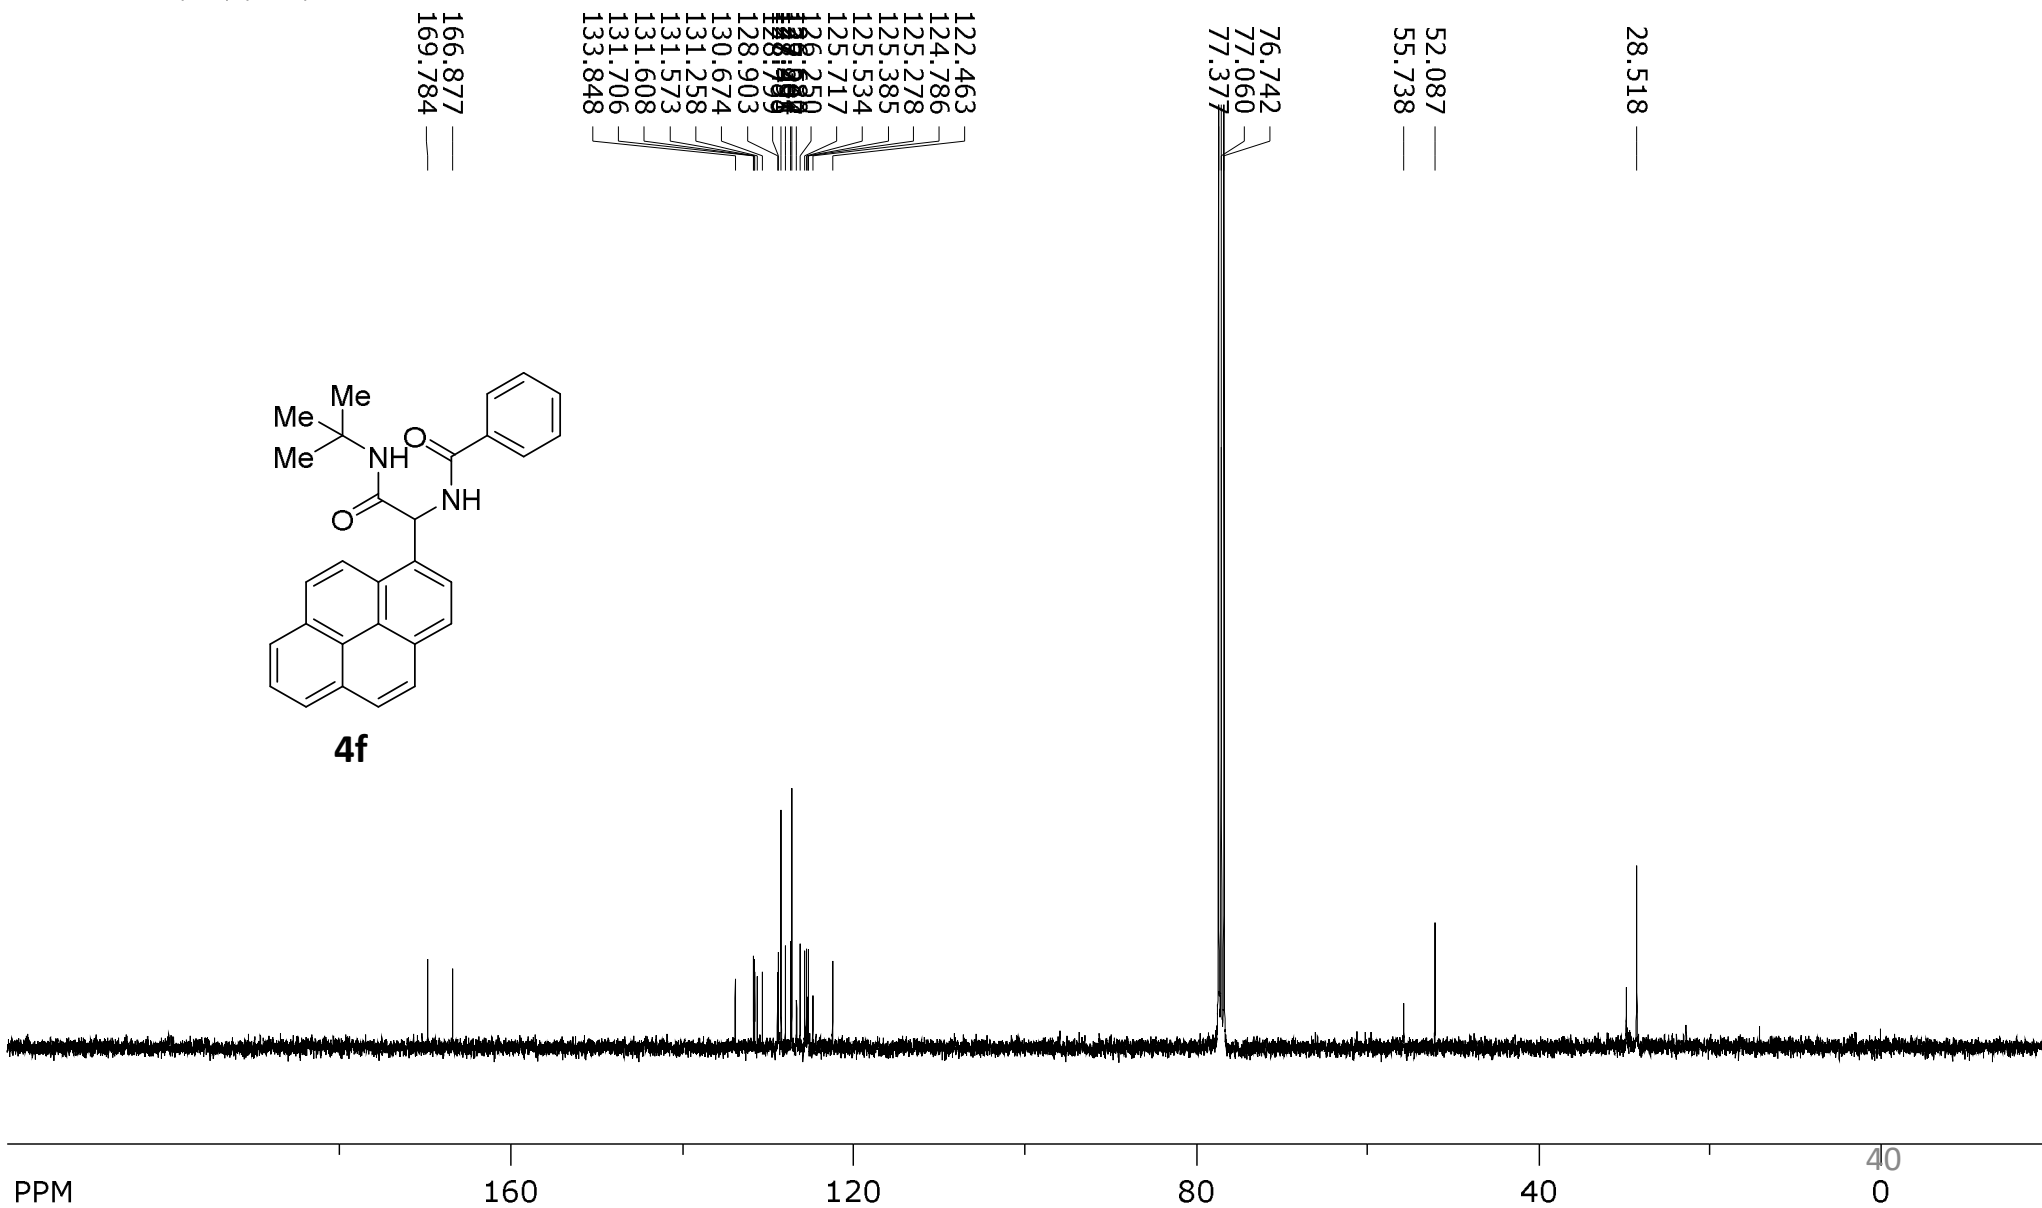



SpinWorks 4: SUB 62  
C13CPD CDCl3 /opt/topspin3.5pl2/nmrdata nmrsu 55

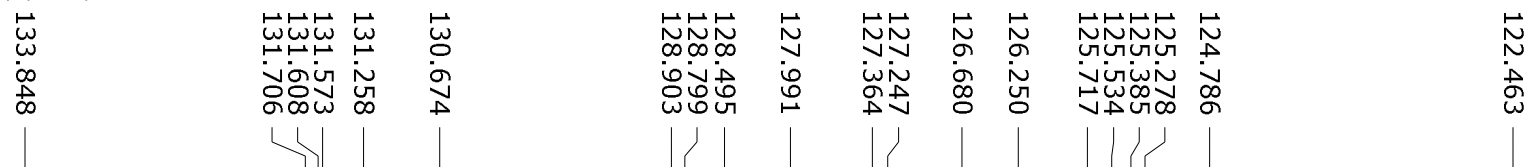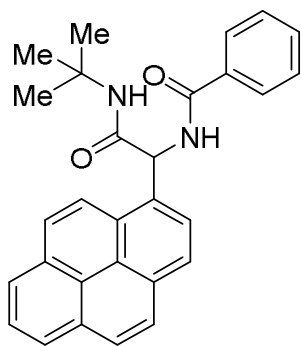

**4f**

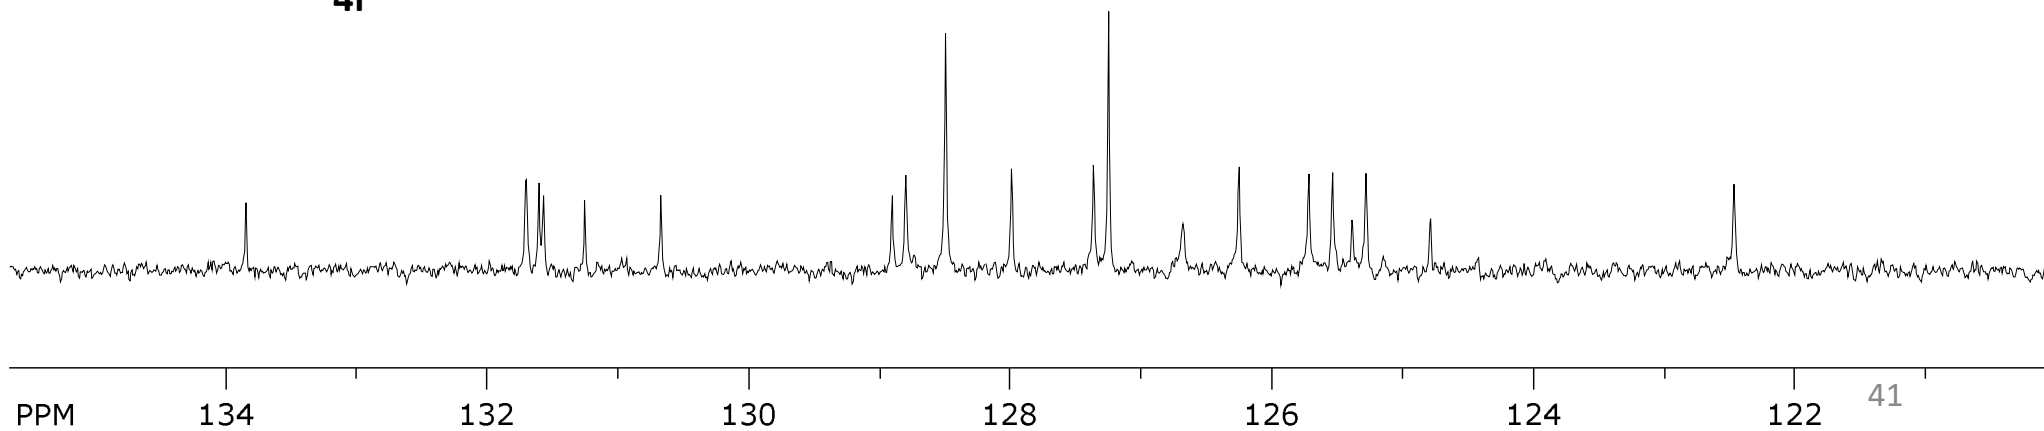

SpinWorks 4: SUB 62  
C13CPD CDCl3 /opt/topspin3.5pl2/nmrdata nmrsu 55

55.738 —

52.087 —

28.518 —

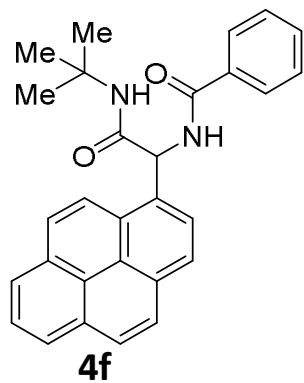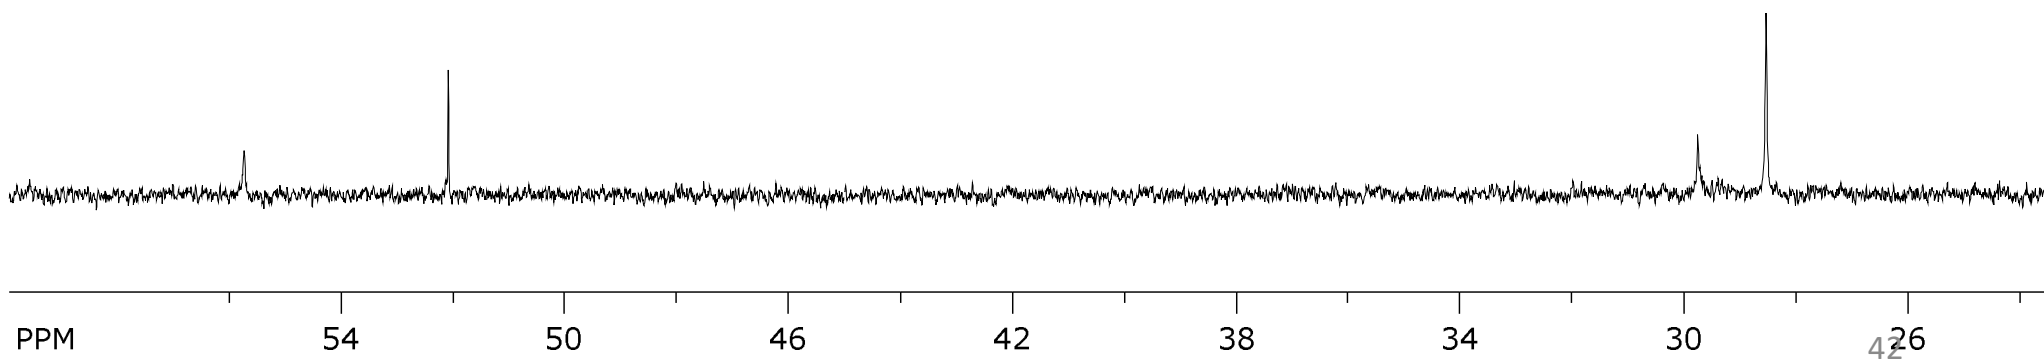

SpinWorks 4: AD-2252  
PROTON CDCl3 /opt/topspin3.5pl2/nmrdata nmrsu 2

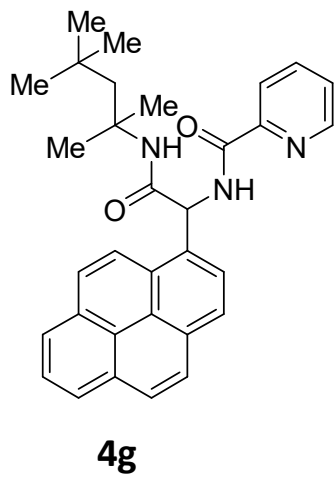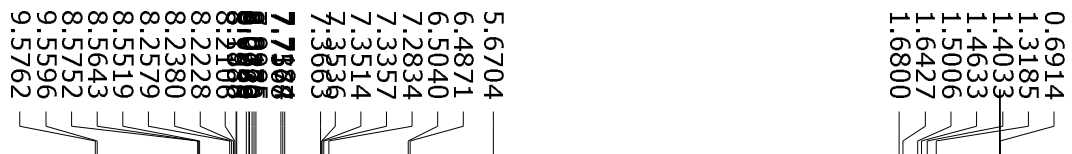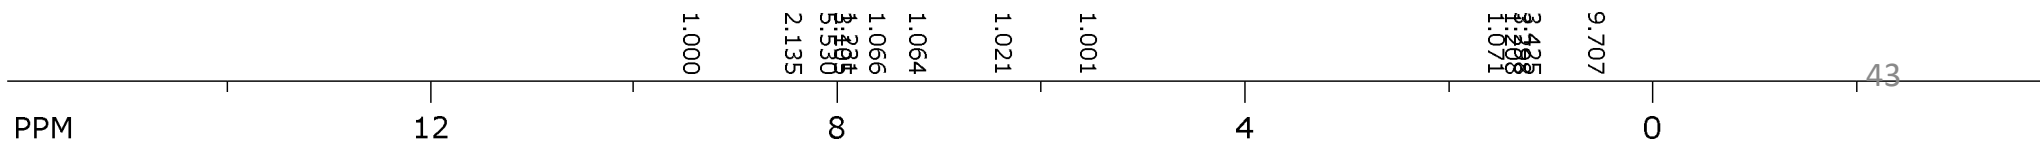

SpinWorks 4: AD-2252  
PROTON CDCl3 /opt/topspin3.5pl2/nmrdata nmrsu 2

9.5596  
9.5762

8.5519  
8.5643  
8.5752

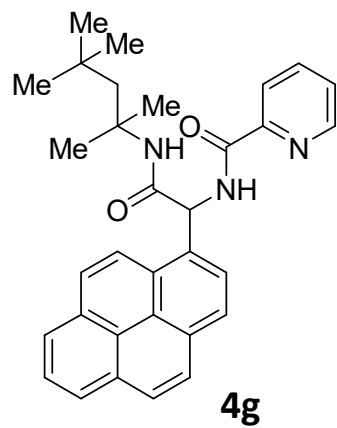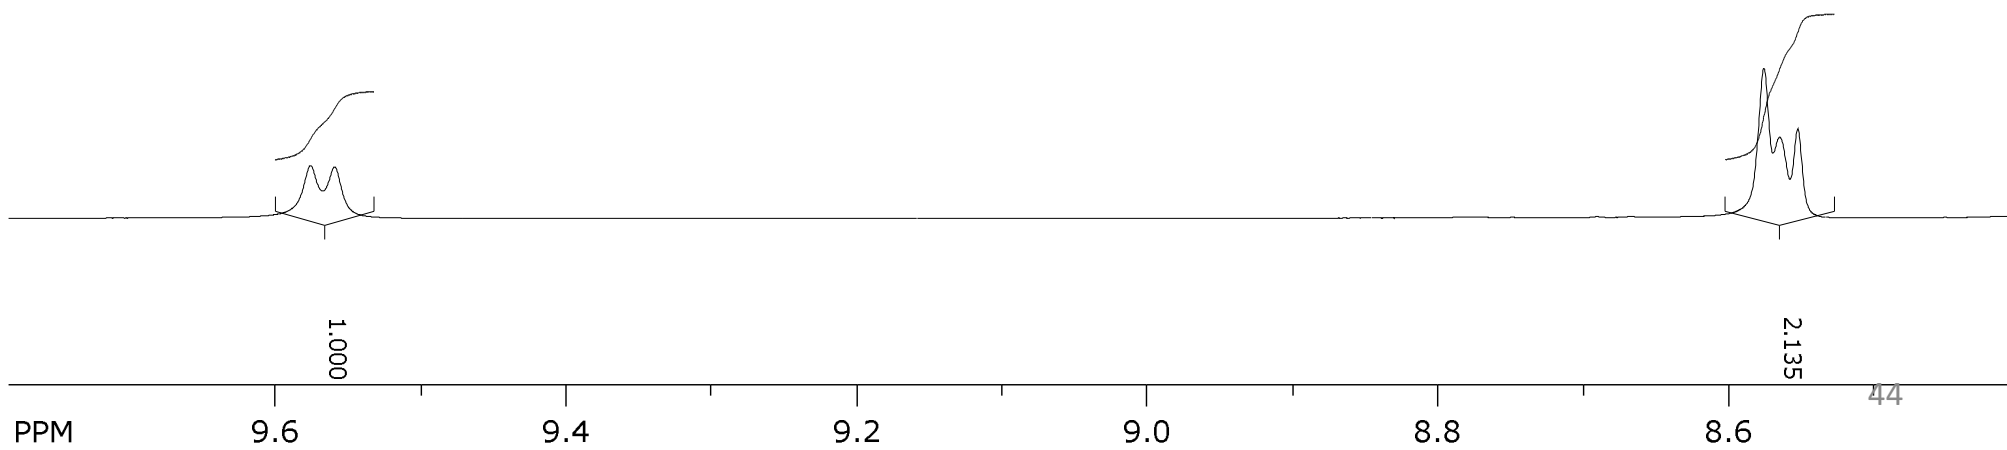

SpinWorks 4: AD-2252  
PROTON CDCl3 /opt/topspin3.5pl2/nmrdata nmrsu 2

|        |        |        |        |        |        |
|--------|--------|--------|--------|--------|--------|
| 8.1880 | 8.0963 | 7.9985 | 7.7184 | 7.3357 | 7.2834 |
| 8.1938 | 8.0636 | 8.0175 | 7.7377 | 7.3514 |        |
| 8.2106 | 8.0726 | 8.0370 | 7.7568 | 7.3536 |        |
| 8.2228 |        |        |        | 7.3663 |        |
| 8.2380 |        |        |        |        |        |
| 8.2579 |        |        |        |        |        |

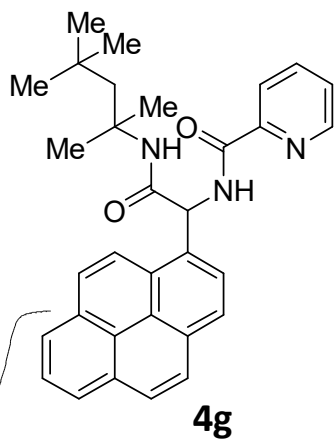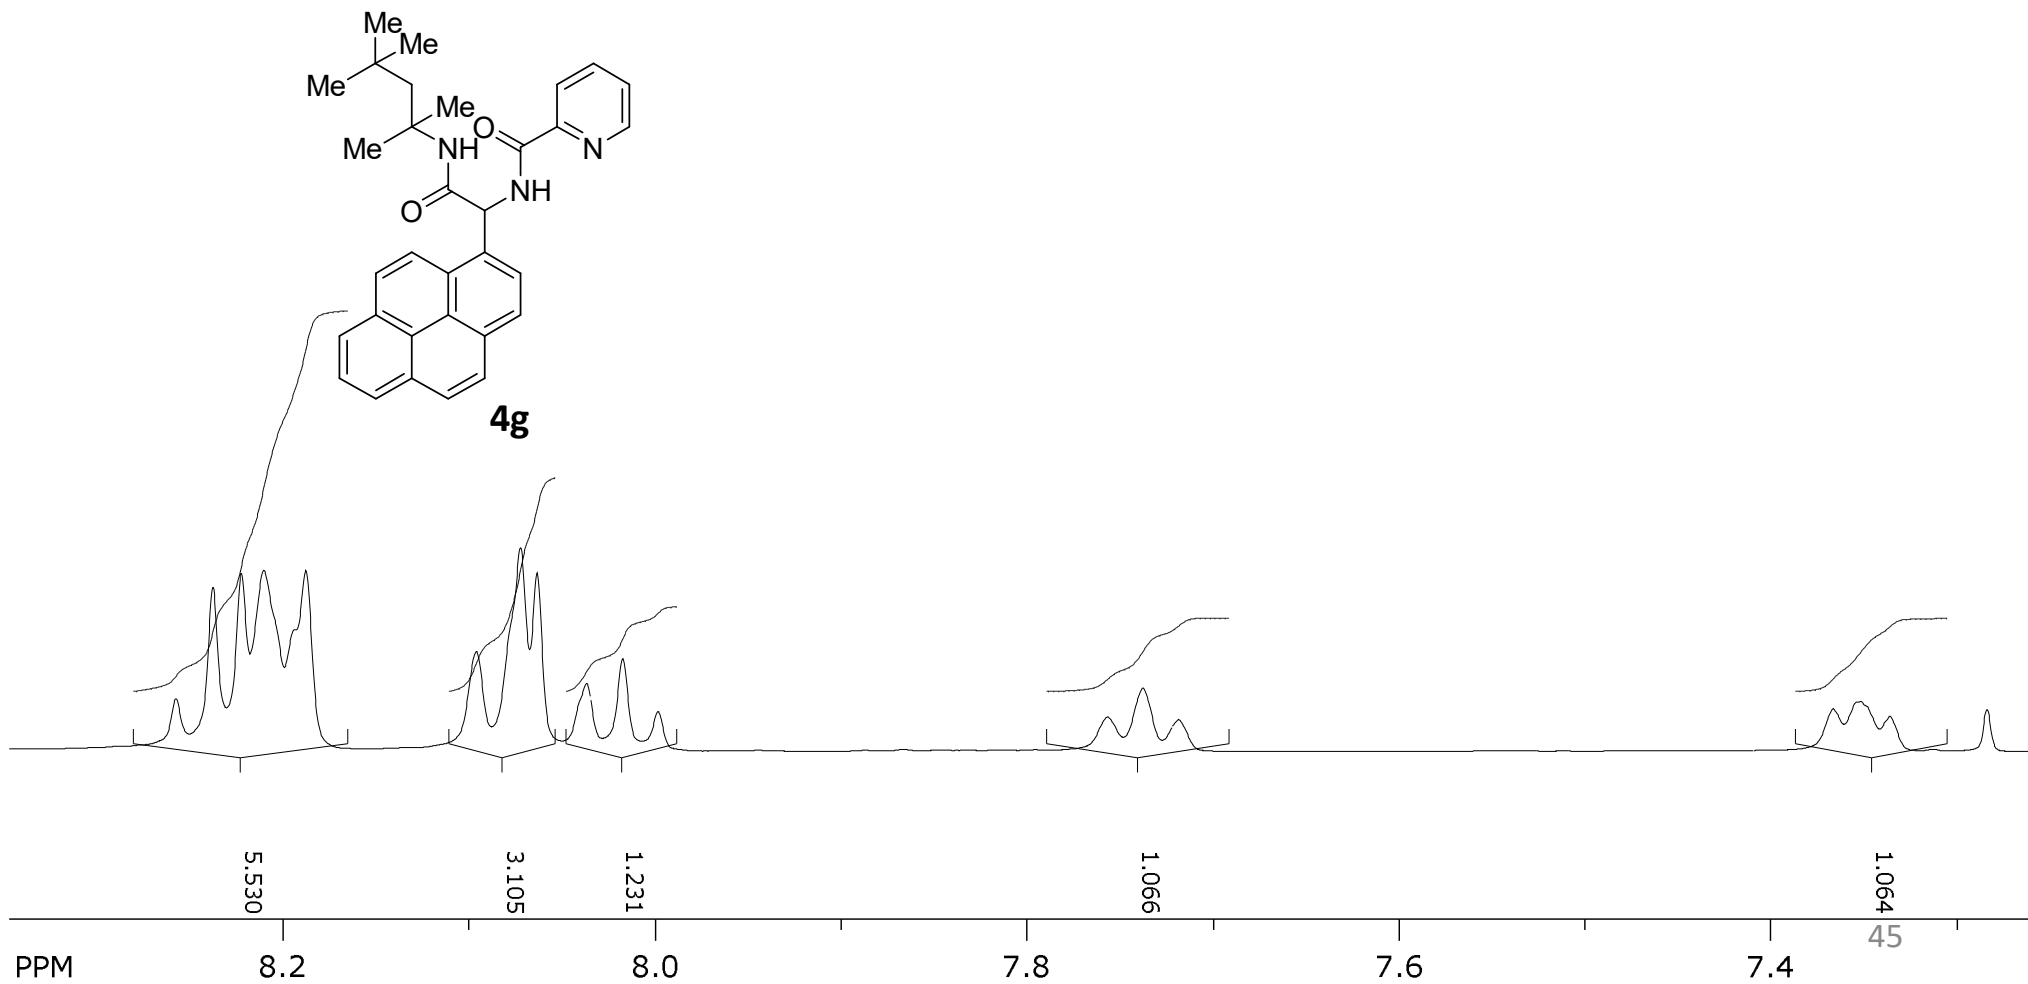

SpinWorks 4: AD-2252  
PROTON CDCl3 /opt/topspin3.5pl2/nmrdata nmrsu 2

6.4871  
6.5040

5.6704

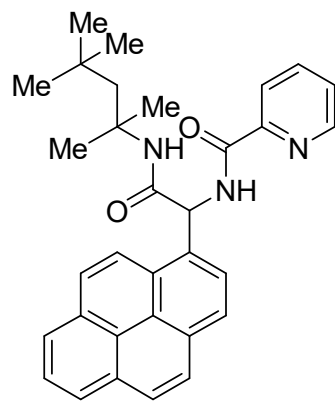

**4g**

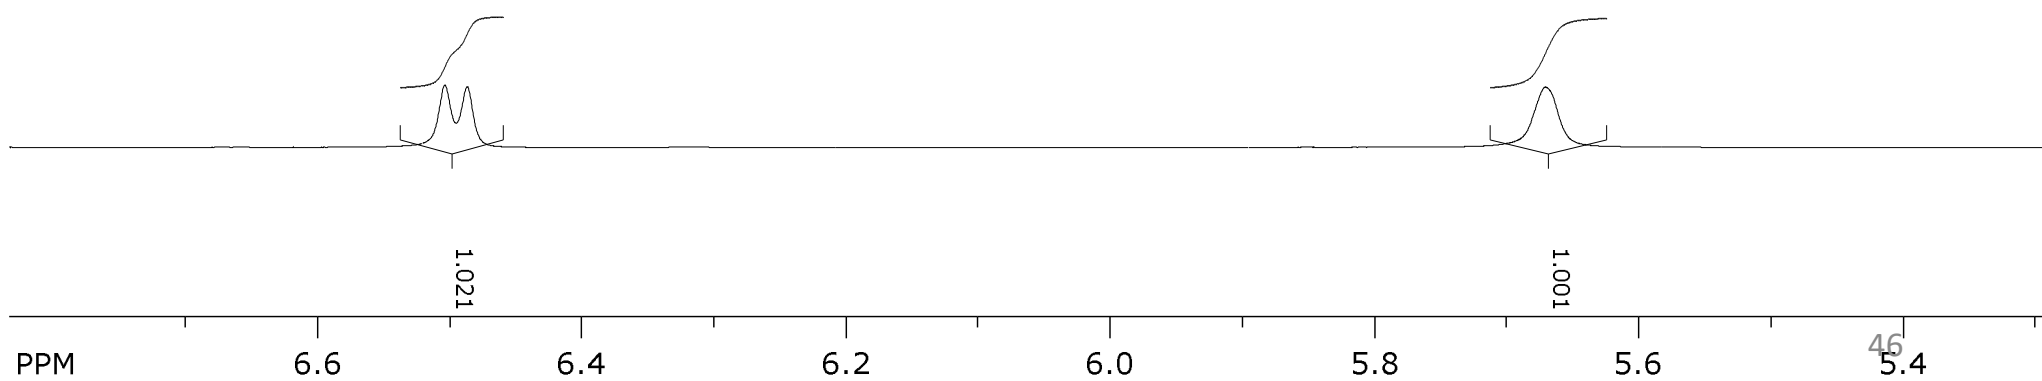

SpinWorks 4: AD-2252  
PROTON CDCl3 /opt/topspin3.5pl2/nmrdata nmrsu 2

1.6800  
1.6427  
1.5006  
1.4633  
1.4033  
1.3185

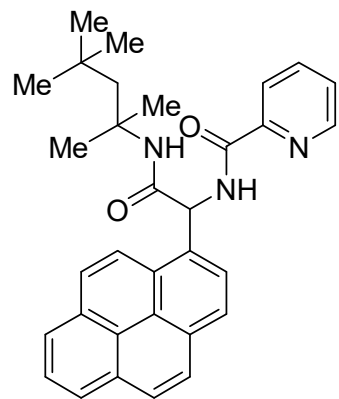

4g

0.6914

1.071

1.208

3.298

3.425

9.707

PPM

1.6

1.4

1.2

1.0

0.8

0.6

47

SpinWorks 4: AD-2252  
C13CPD256 CDCl3 /opt/topspin3.5pl2/nmrdata nmrsu 2

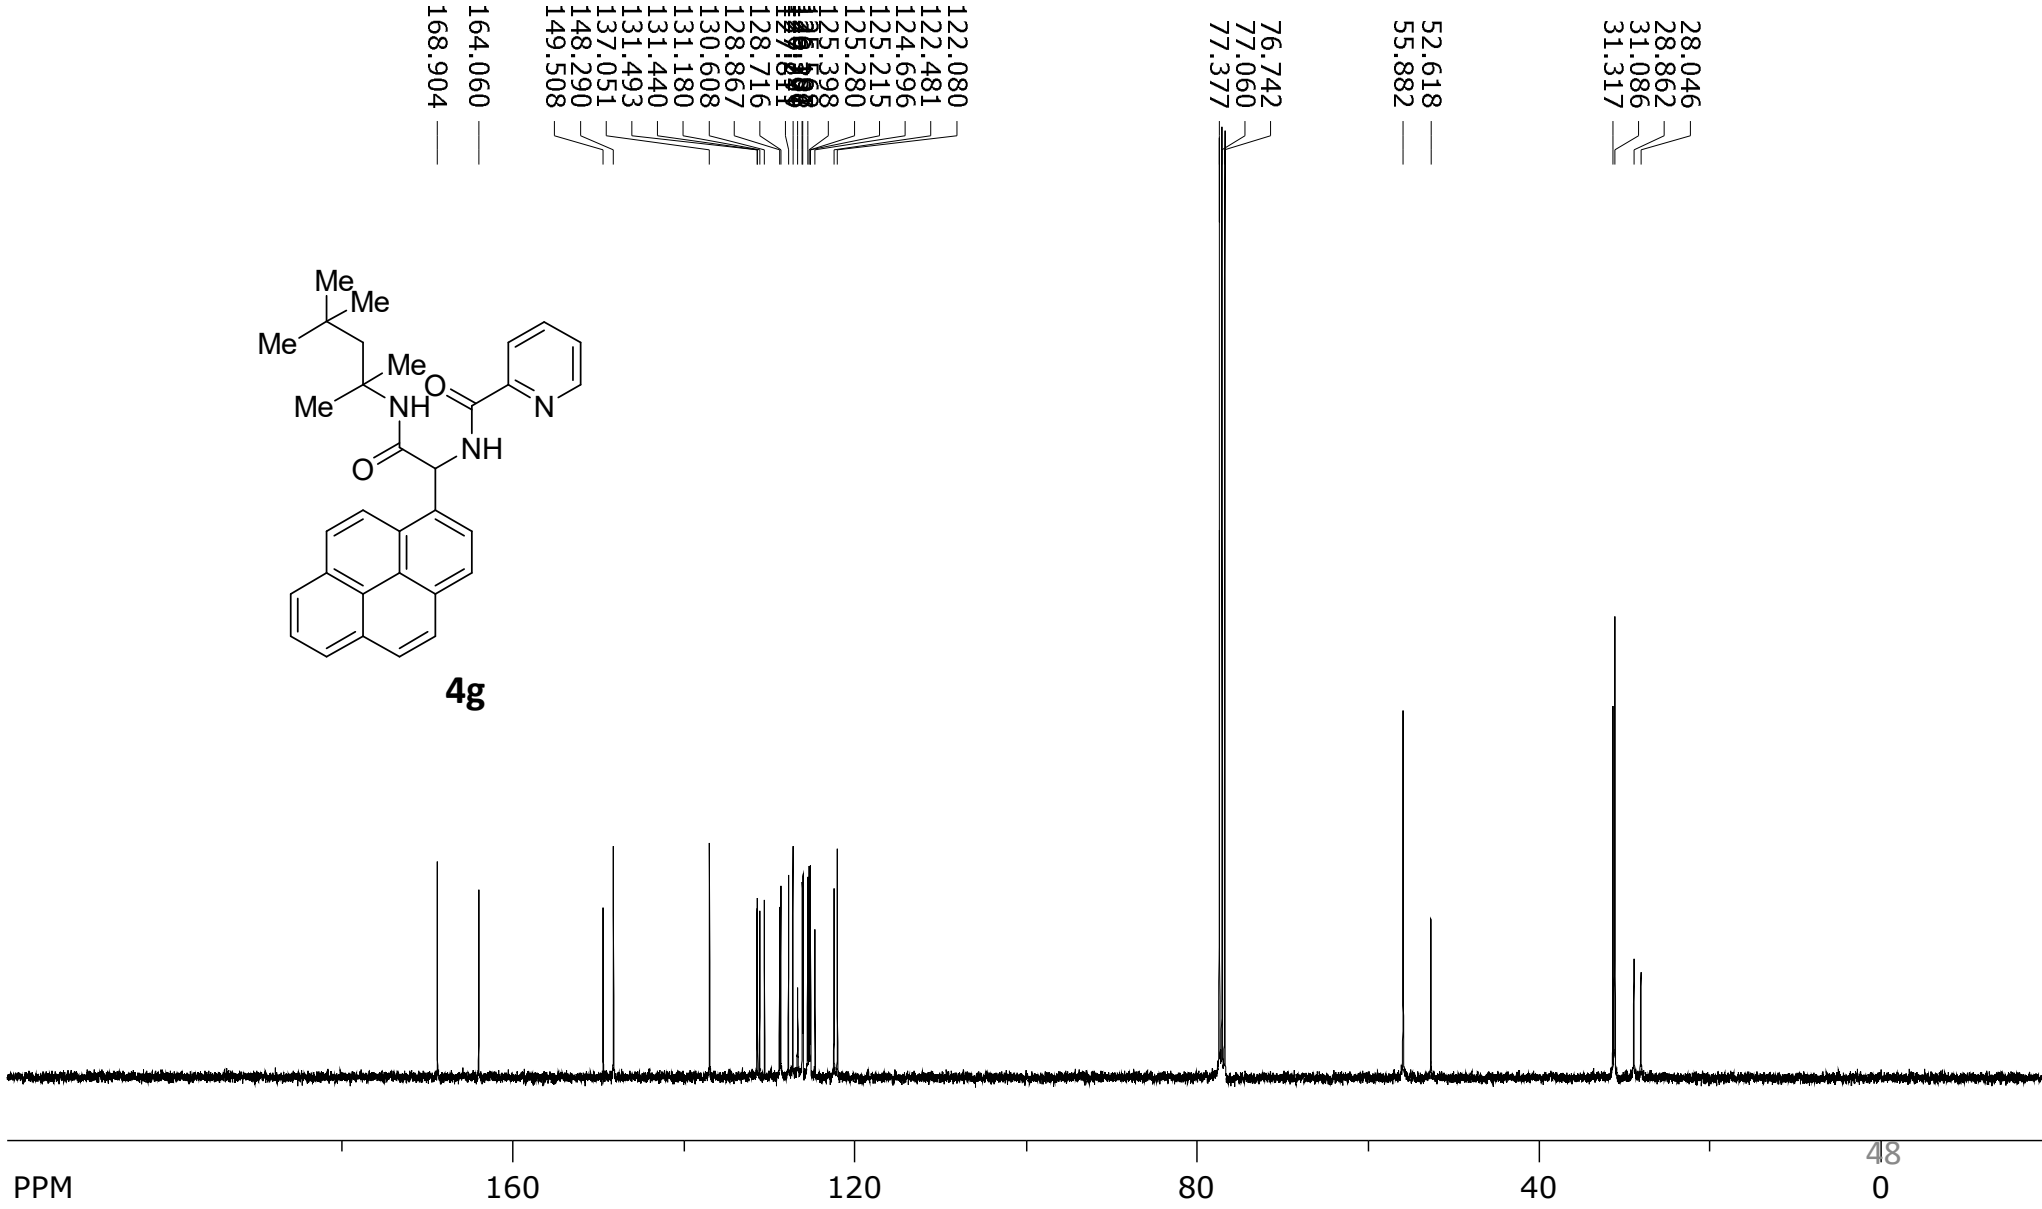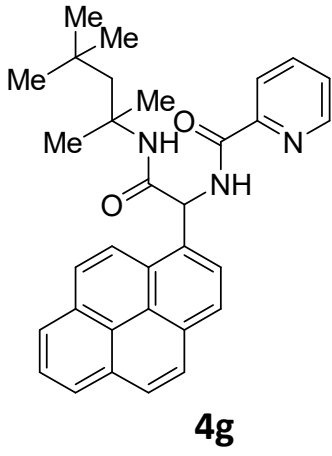



SpinWorks 4: AD-2252  
C13CPD256 CDCl3 /opt/topspin3.5pl2/nmrdata nmrsu 2

149.508 —  
148.290 —  
137.051 —  
131.493 —  
131.440 —  
131.180 —  
130.608 —  
128.867 —  
128.716 —  
127.811 —  
127.299 —  
126.726 —  
126.181 —  
126.107 —  
125.568 —  
125.398 —  
125.280 —  
125.215 —  
124.696 —  
122.481 —  
122.080 —

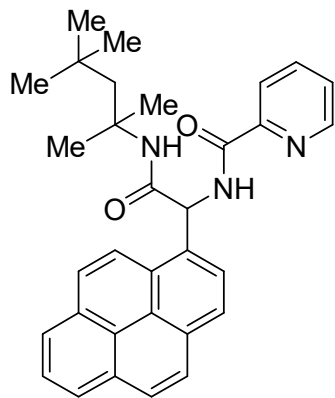

**4g**

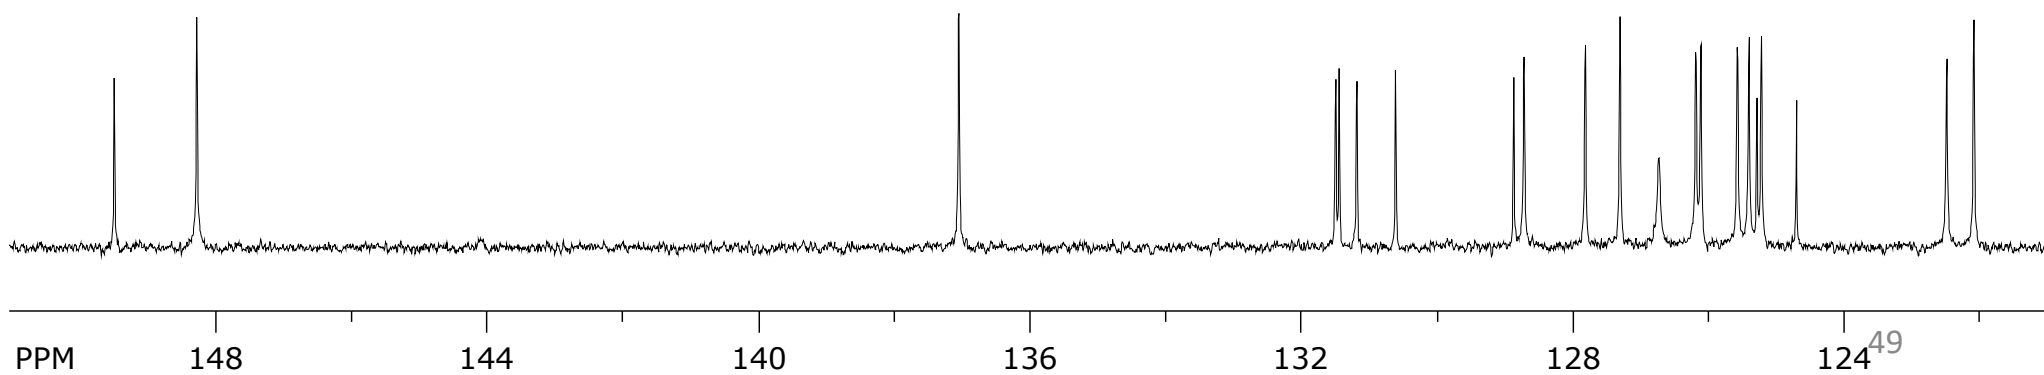



SpinWorks 4: AD-2253  
PROTON CDCl3 /opt/topspin3.5pl2/nmrdata nmrsu 3

9.4159  
9.4339

8.5647  
8.5877

8.4453

8.2470  
8.2669

8.1852  
8.1642  
8.1420  
8.1285

8.1044  
8.0304  
8.0540  
7.9976  
7.9792  
7.9632

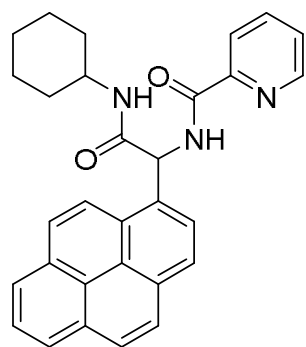

**4h**

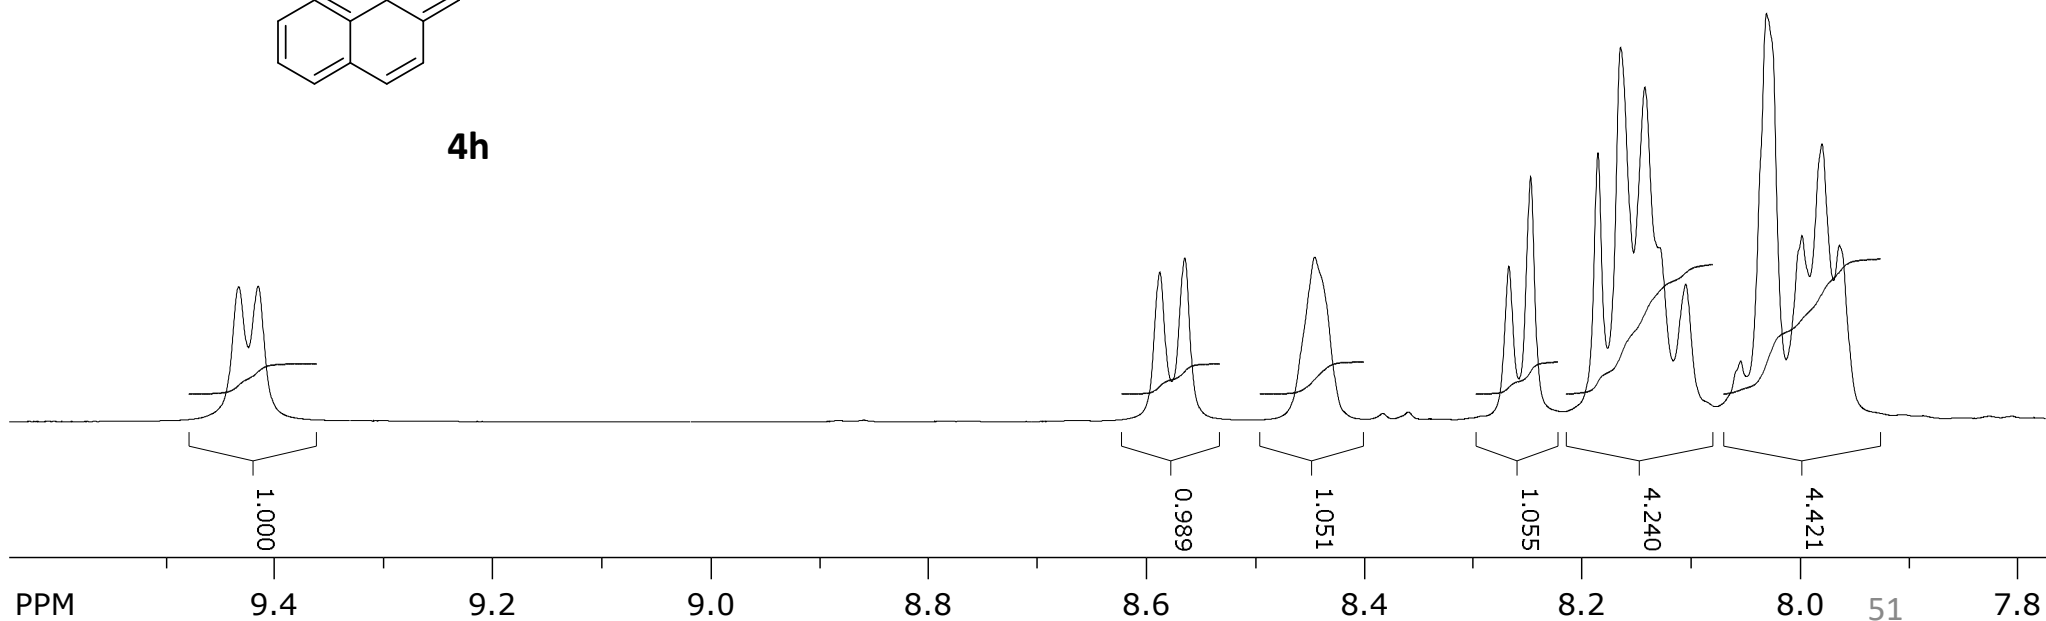

SpinWorks 4: AD-2253  
PROTON CDCl3 /opt/topspin3.5pl2/nmrdata nmrsu 3

7.6131  
7.6237

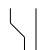

7.2350  
7.2417  
7.2503  
7.2829

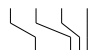

6.7066  
6.7236  
6.7408

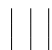

6.2137  
6.2440

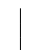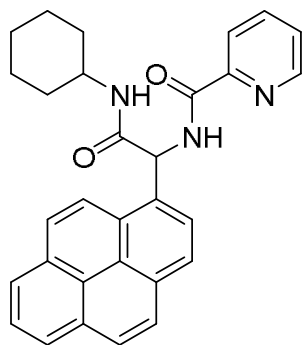

**4h**

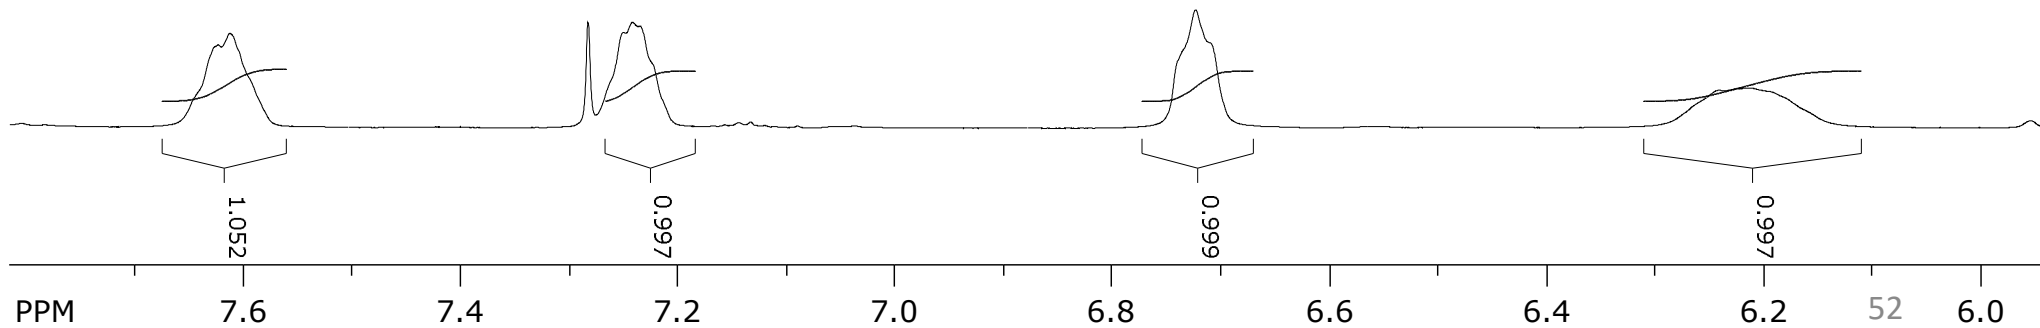

SpinWorks 4: AD-2253  
PROTON CDCl3 /opt/topspin3.5pl2/nmrdata nmrsu 3

3.8923 —  
3.8731 —  
3.8656 —  
3.8558 —  
3.8459 —  
3.8384 —  
3.8192 —



**4h**

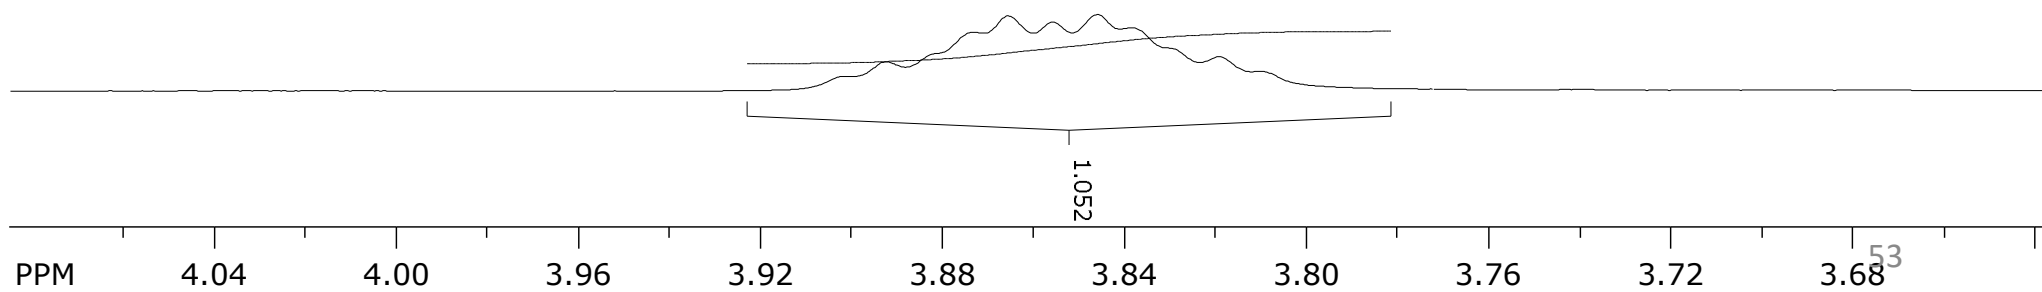

SpinWorks 4: AD-2253  
PROTON CDCl3 /opt/topspin3.5pl2/nmrdata nmrsu 3

1.8856  
1.9120

1.7055  
1.7226  
1.7334

1.5454  
1.5775  
1.5782

1.4554  
1.4685

1.1717  
1.1785  
1.1792  
1.2046  
1.2271  
1.2386  
1.2498  
1.2690  
1.2804  
1.2980

0.7767  
0.7843  
0.8070  
0.8128  
0.8362  
0.8417  
0.8641  
0.8724  
0.8923  
0.9215  
0.9529  
0.9767  
0.9853  
1.0078  
1.0134  
1.0376  
1.0416  
1.0645  
1.0718

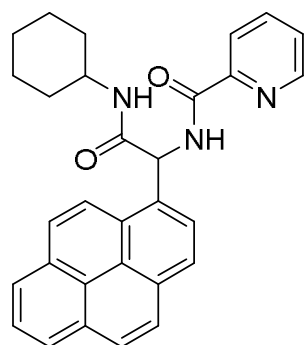

**4h**

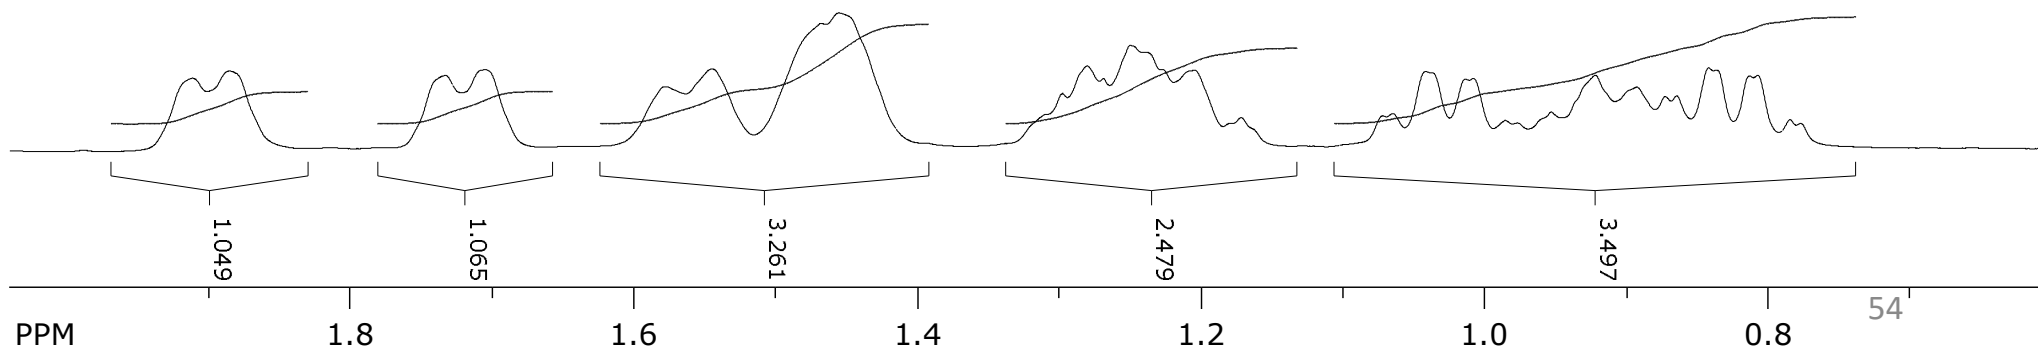

SpinWorks 4: AD-2253  
C13CPD256 CDCl3 /opt/topspin3.5pl2/nmrdata nmrsu 3

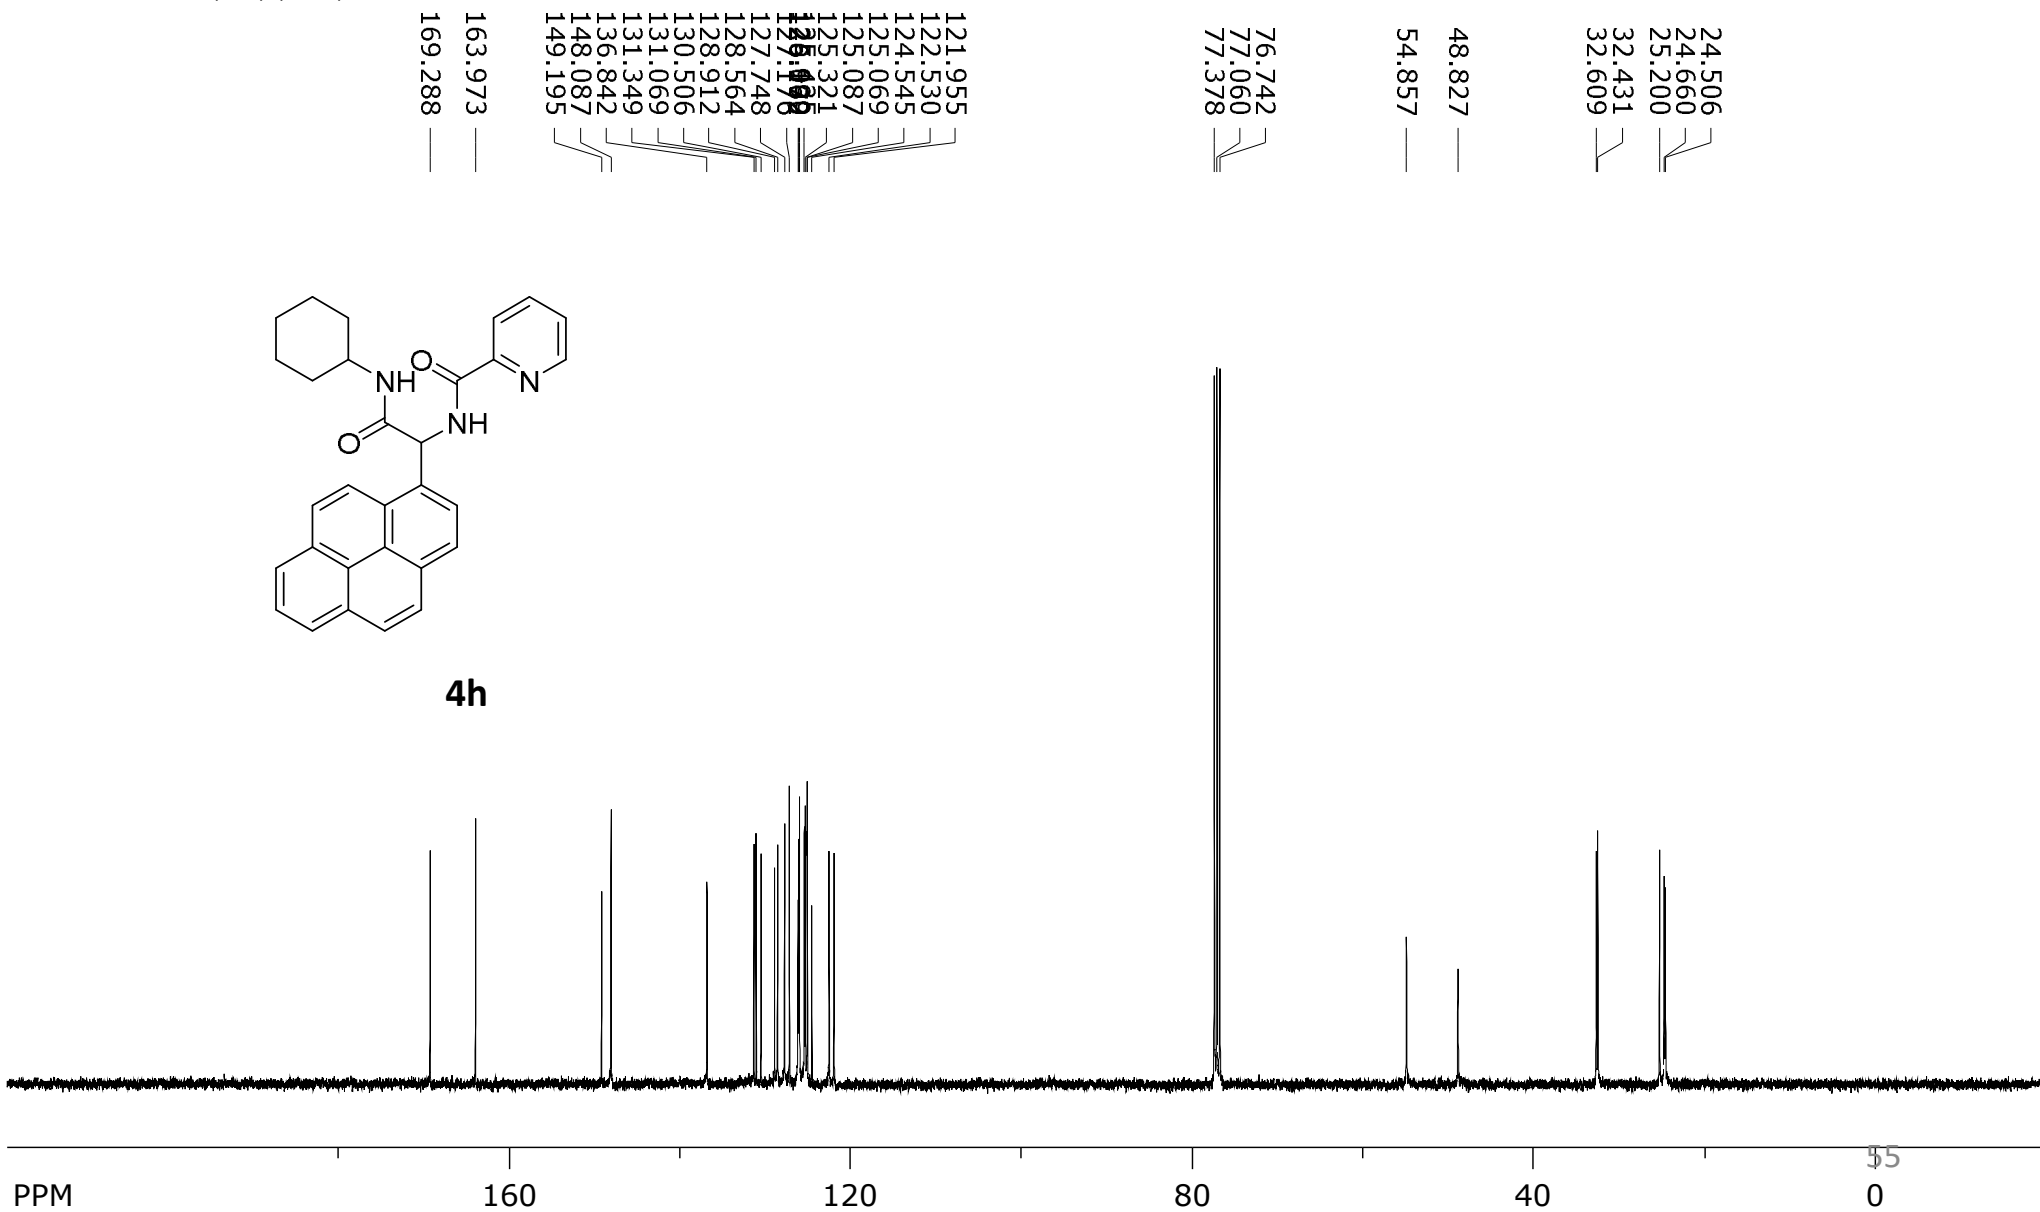

SpinWorks 4: AD-2253  
C13CPD256 CDCl3 /opt/topspin3.5pl2/nmrdata nmrsu 3

149.195 —  
148.087 —  
136.842 —  
131.349 —  
131.069 —  
130.506 —  
128.912 —  
128.564 —  
127.748 —  
127.176 —  
126.172 —  
126.060 —  
125.999 —  
125.435 —  
125.321 —  
125.087 —  
125.069 —  
124.545 —  
122.530 —  
121.955 —

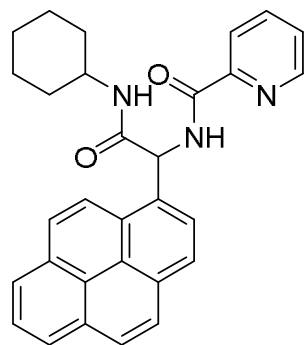

4h

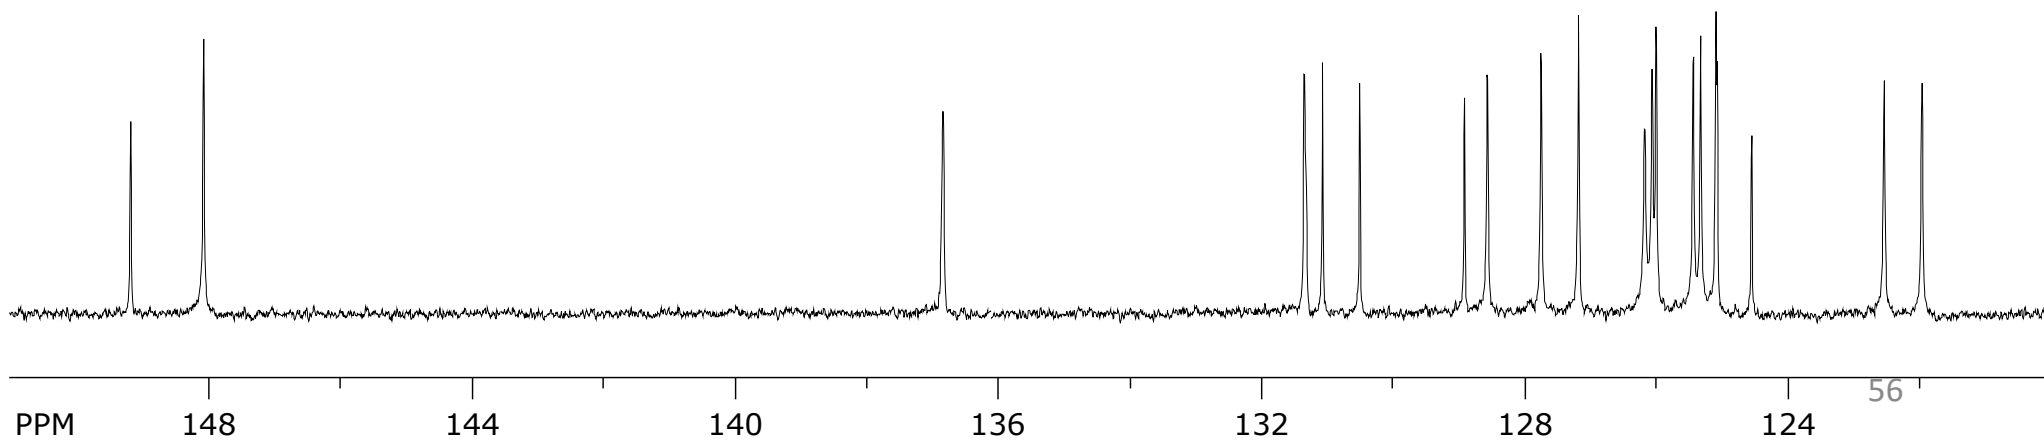



SpinWorks 4: AD-2253  
C13CPD256 CDCl3 /opt/topspin3.5pl2/nmrdata nmrsu 3

54.857

48.827

32.431  
32.609

24.506  
24.660  
25.200



**4h**

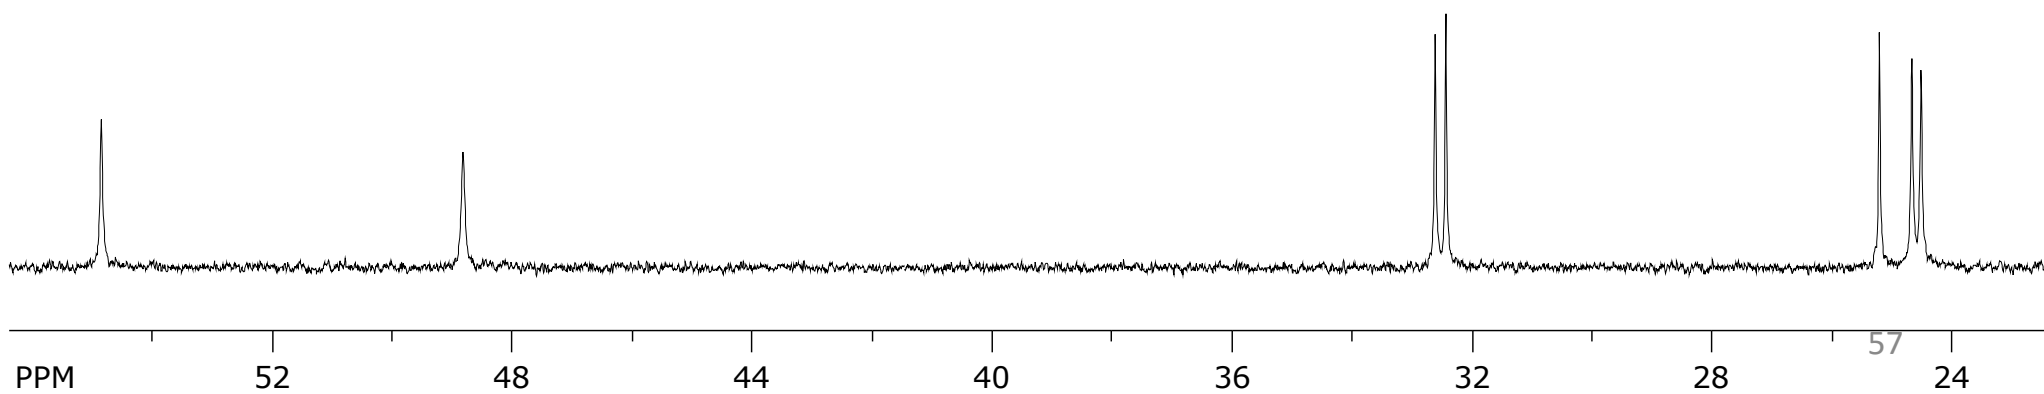

SpinWorks 4: AD 1789  
PROTON CDCl3 /opt/topspin3.5pl2/nmrdata nmrsu 35

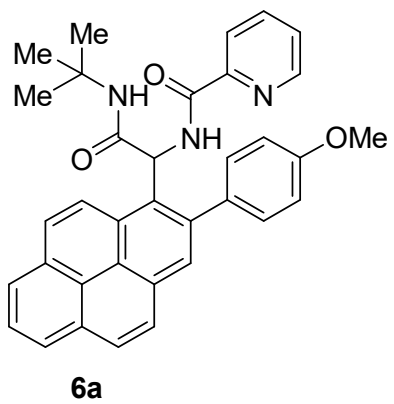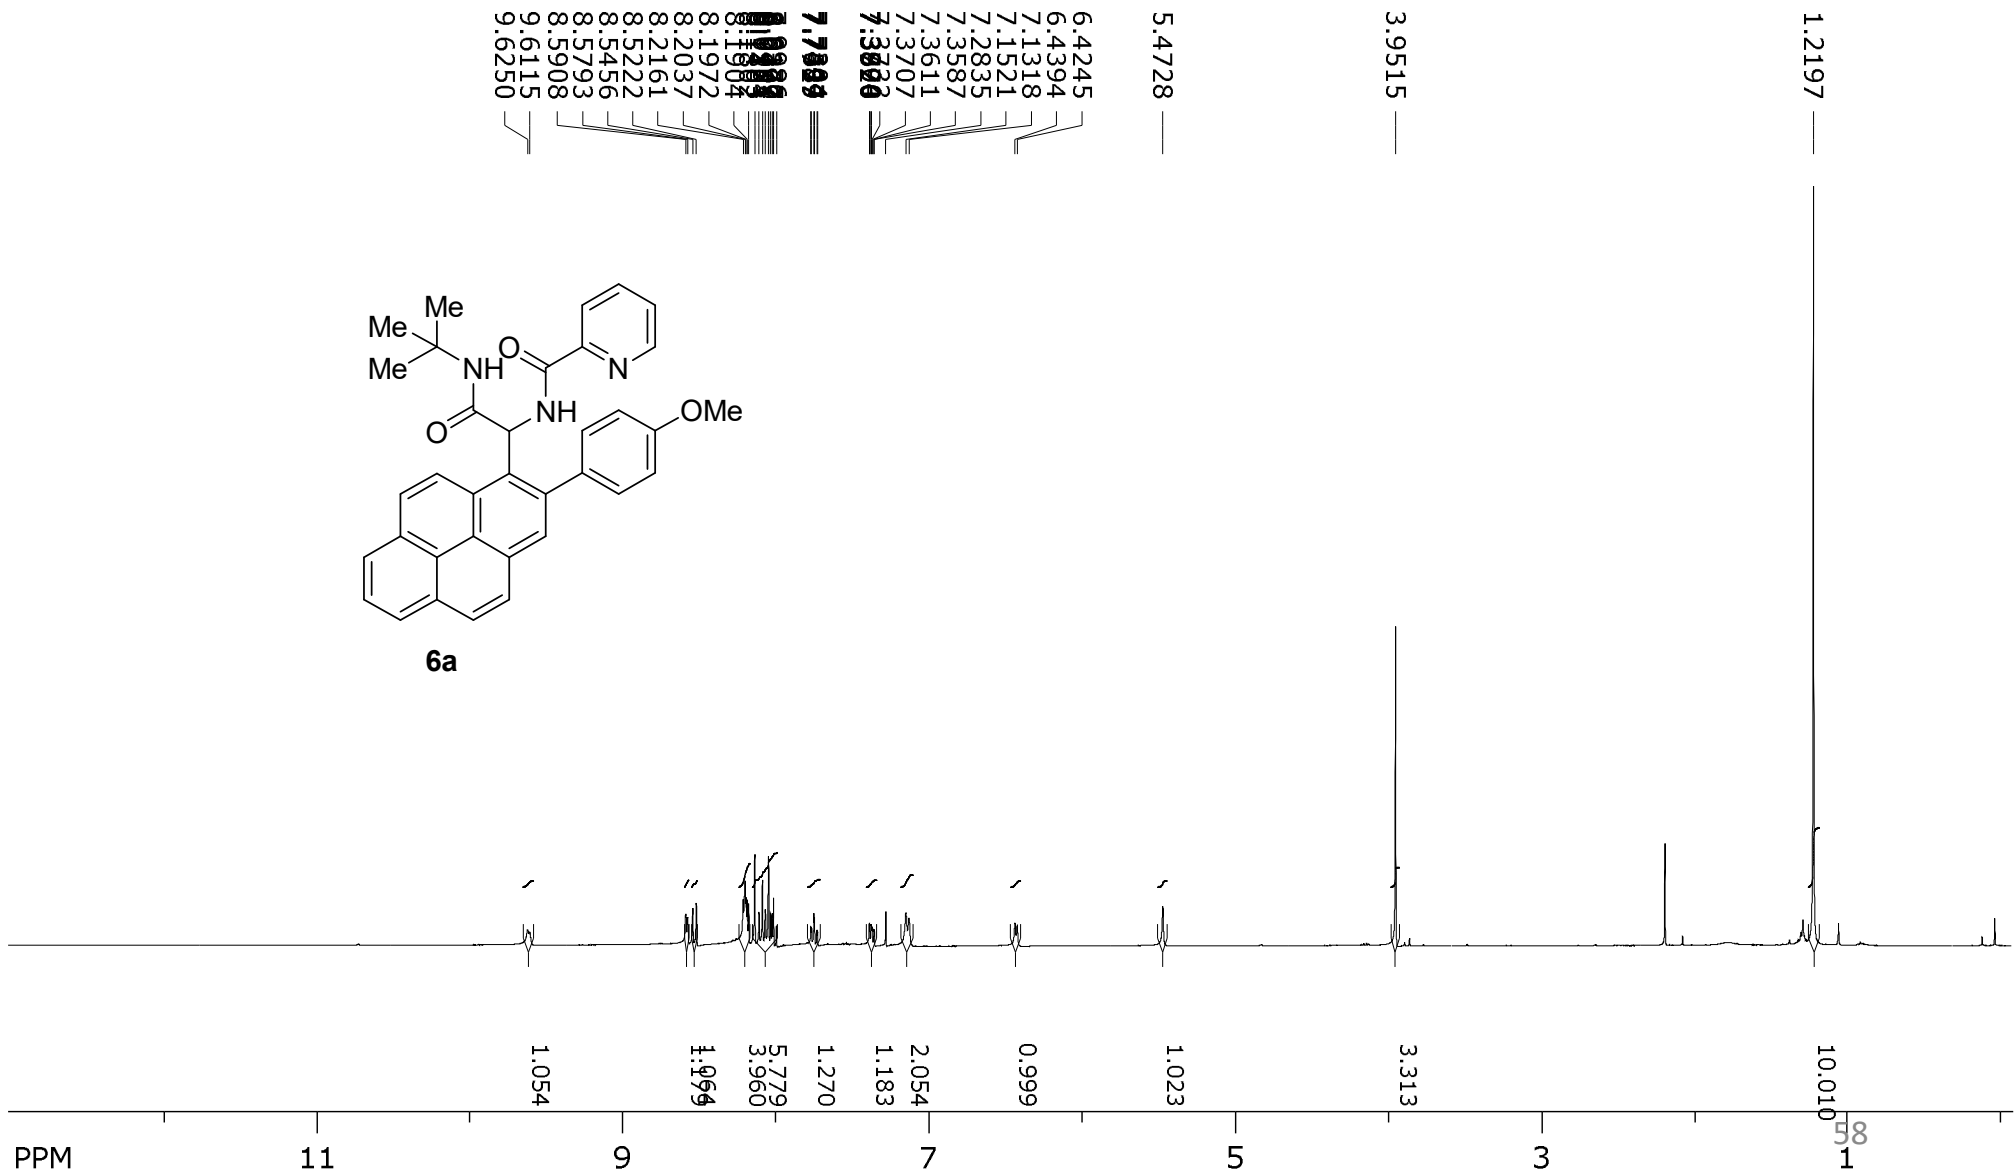

SpinWorks 4: AD 1789  
PROTON CDCl3 /opt/topspin3.5pl2/nmrdata nmrsu 35

8.5222  
8.5456  
8.5793  
8.5908

7.9986  
8.0177  
8.0272  
8.0367  
8.0499  
8.0711  
8.0901  
8.1124  
8.1403  
8.1802  
8.1904  
8.1972  
8.2037  
8.2161

7.7304  
7.7344  
7.7497  
7.7537  
7.7689  
7.7729

7.2835  
7.3587  
7.3611  
7.3707  
7.3733  
7.3774  
7.3800  
7.3896  
7.3920

7.1318  
7.1521

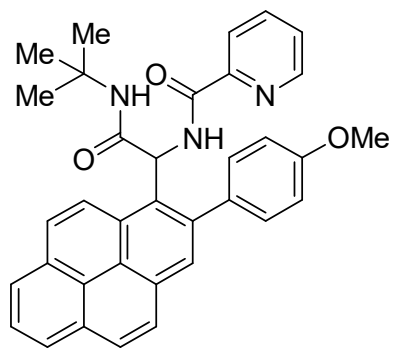

6a

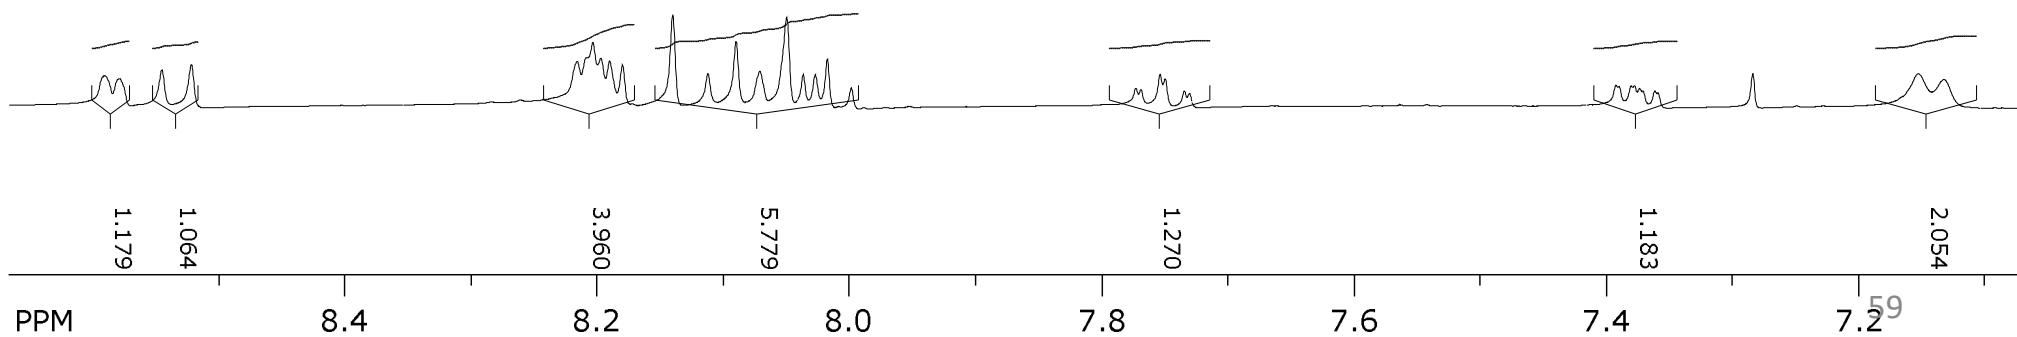



SpinWorks 4: AD 1789  
C13CPD CDCl3 /opt/topspin3.5pl2/nmrdata nmrsu 35

149.698 —

148.312 —

141.009 —

137.075 —

133.964 —

131.121 —

131.031 —

130.456 —

129.501 —

129.144 —

128.696 —

128.272 —

127.436 —

127.225 —

126.143 —

125.619 —

125.513 —

124.995 —

124.691 —

123.857 —

122.051 —

114.041 —

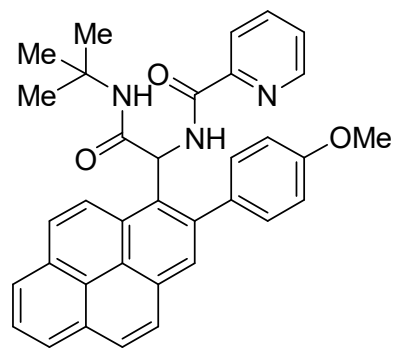

6a

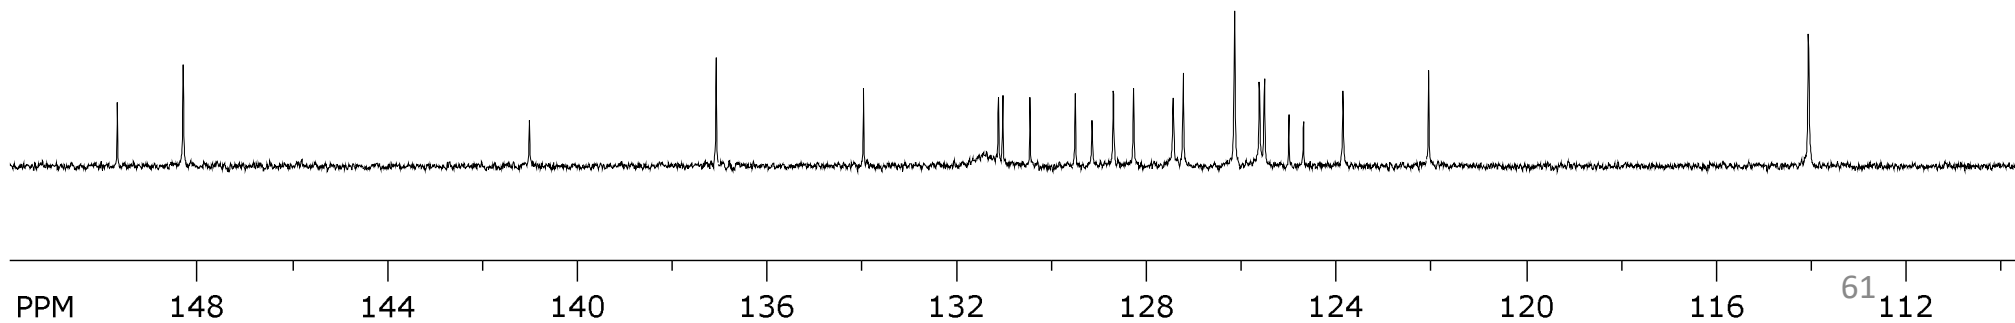

SpinWorks 4: AD 1851 RE  
PROTON CDCl3 /opt/topspin3.5pl2/nmrdata nmrsu 13

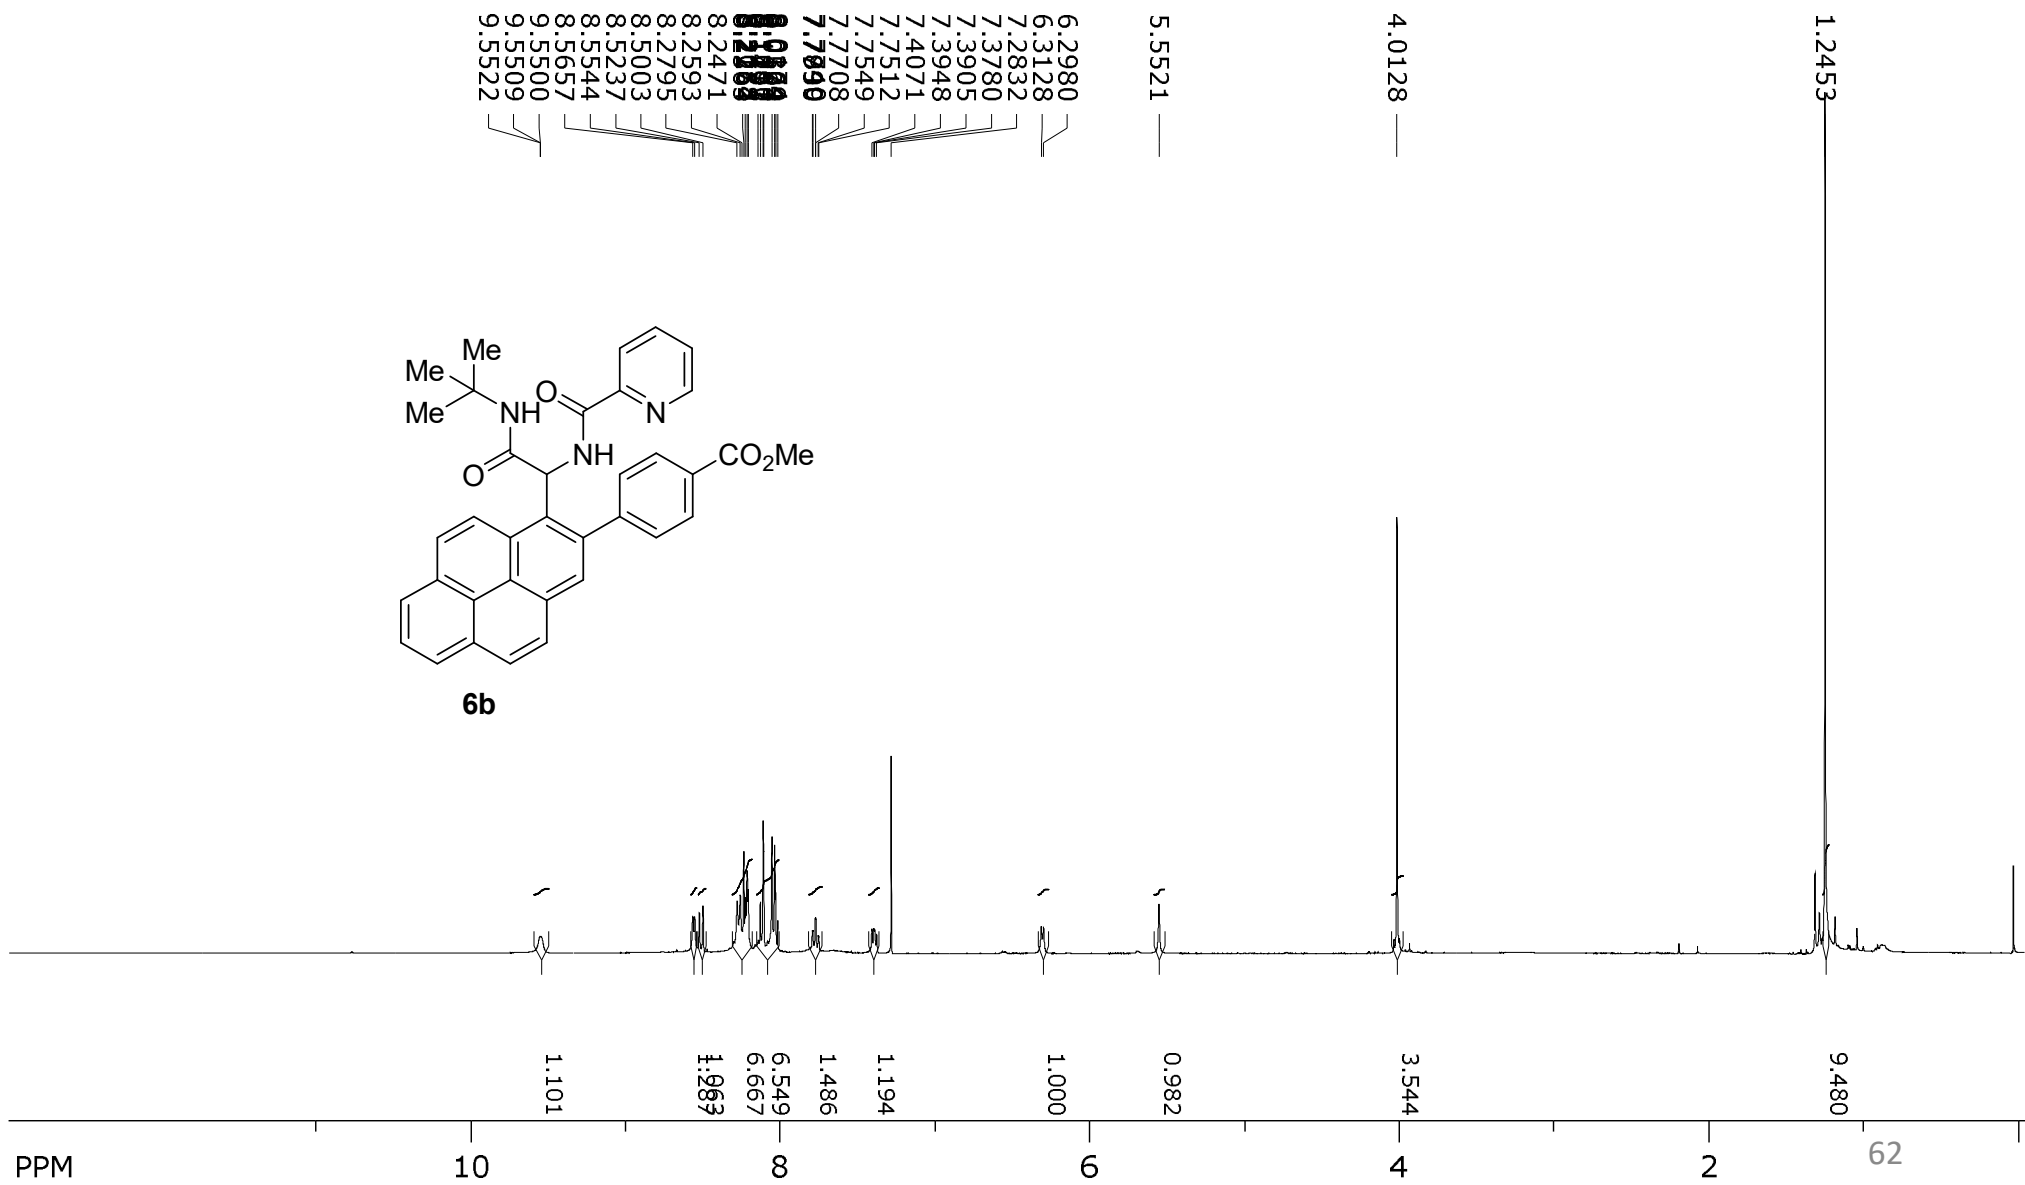

SpinWorks 4: AD 1851 RE  
PROTON CDCl3 /opt/topspin3.5pl2/nmrdata nmrsu 13

8.5003  
8.5237  
8.5544  
8.5657

8.2078  
8.2152  
8.2264  
8.2363  
8.2471  
8.2593  
8.2795

8.1080  
8.1111  
8.1297  
8.1433

8.0174  
8.0309  
8.0364  
8.0533

7.7512  
7.7549  
7.7708  
7.7740  
7.7899  
7.7930

7.3780  
7.3905  
7.3948  
7.4071

7.2832

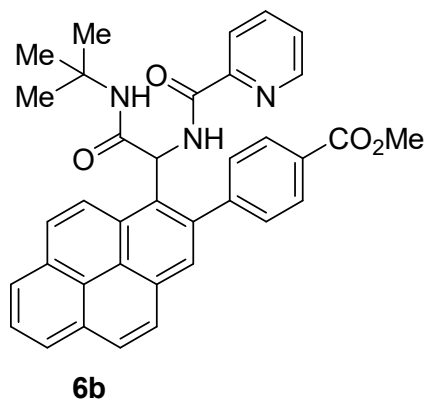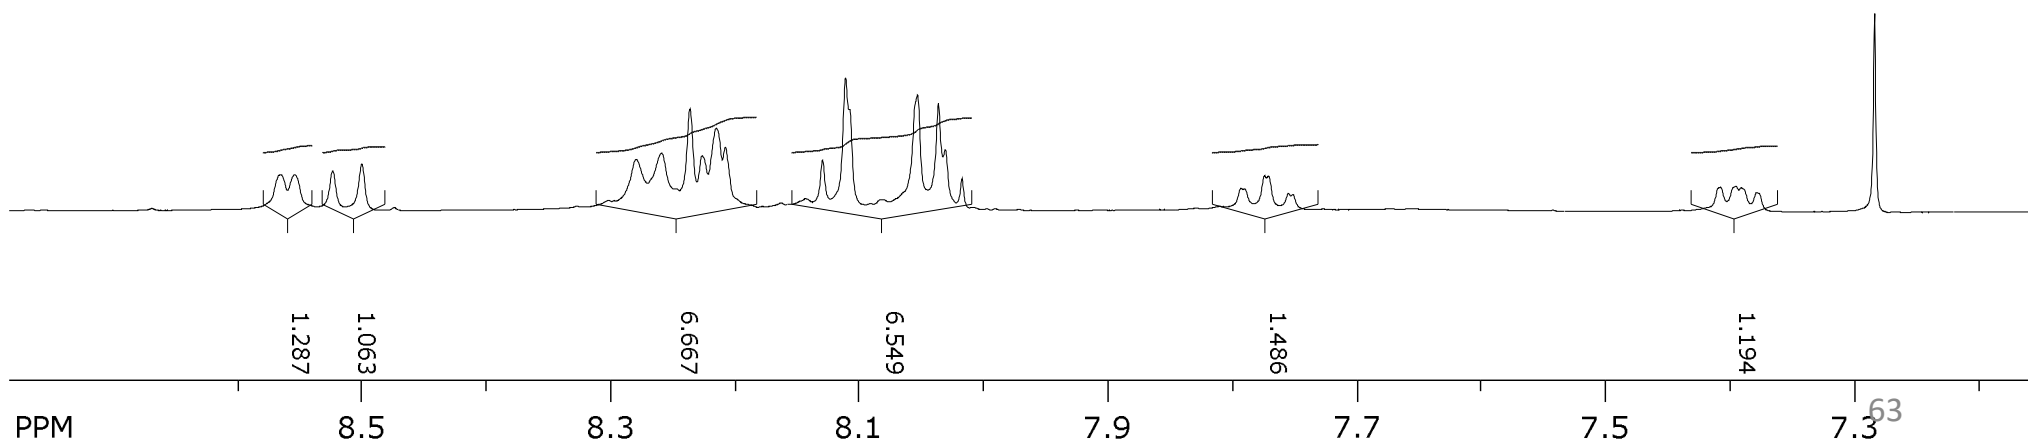

SpinWorks 4: AD-1851  
C13CPD256 CDCl3 /opt/topspin3.5pl2/nmrdata nmrsu 16

163.536  
166.989  
169.305  
149.224  
147.980  
146.580  
140.334  
137.479  
131.143  
131.108  
130.490  
129.794  
129.775  
129.000  
128.980  
128.960  
125.854  
125.733  
125.228  
124.588  
123.632  
122.316

76.742  
77.059  
77.377

51.907  
52.260  
55.174

28.489

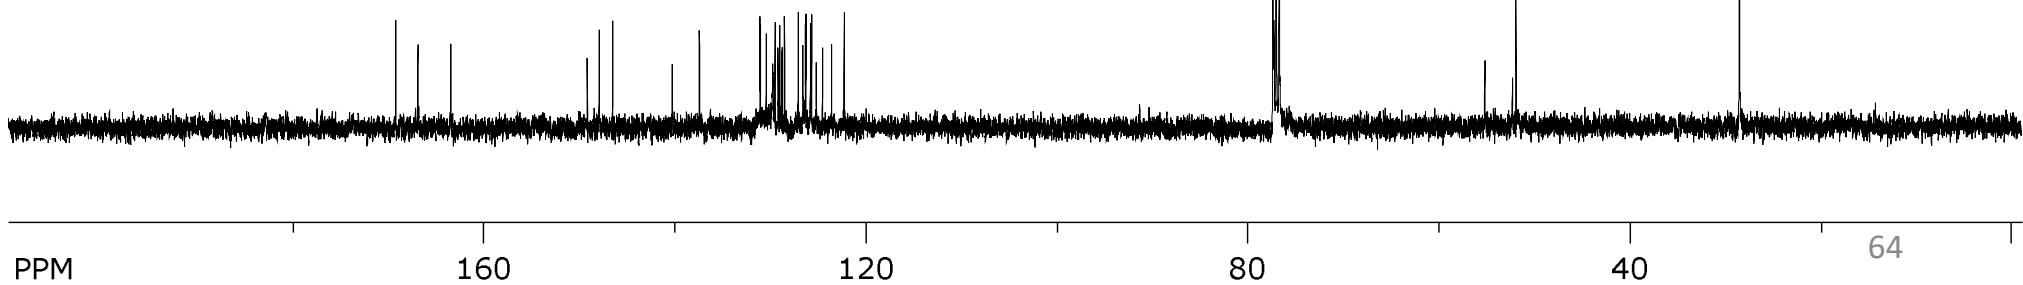



SpinWorks 4: AD-1851  
C13CPD256 CDCl3 /opt/topspin3.5pl2/nmrdata nmrsu 16

140.334 —

137.479 —

131.108 —  
131.143 —

129.794 —  
129.775 —  
129.560 —  
129.236 —  
129.060 —  
128.828 —  
128.563 —

127.127 —

126.646 —

126.373 —

126.320 —

125.854 —

125.733 —

125.228 —

124.588 —

123.632 —

122.316 —

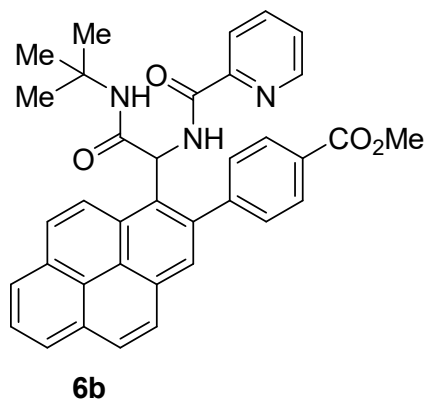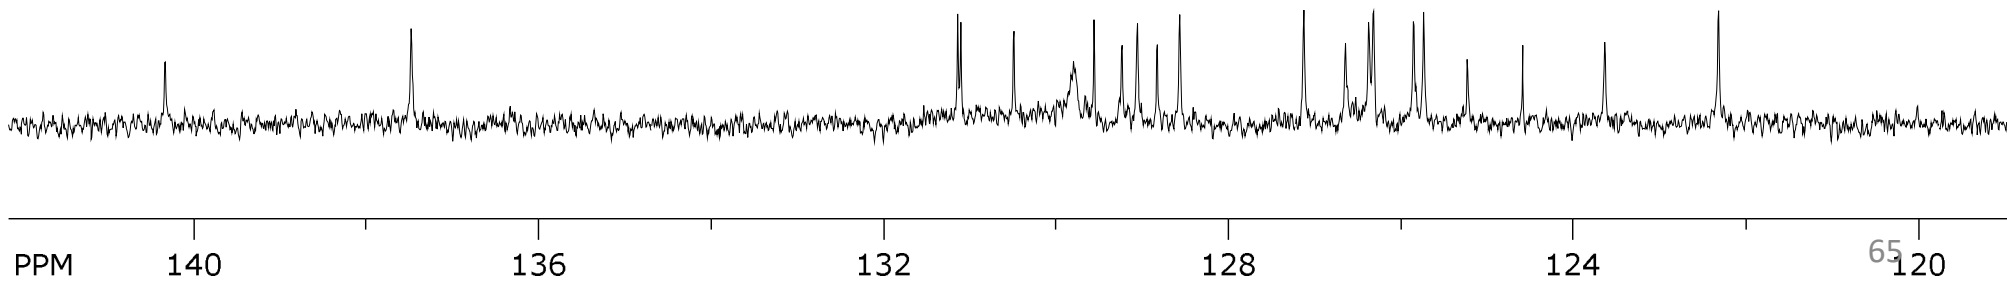

SpinWorks 4: AD 1813  
PROTON CDCl3 /opt/topspin3.5pl2/nmrdata nmrsu 23

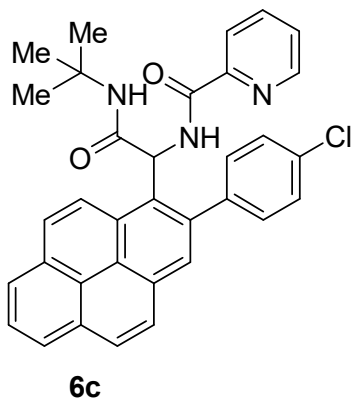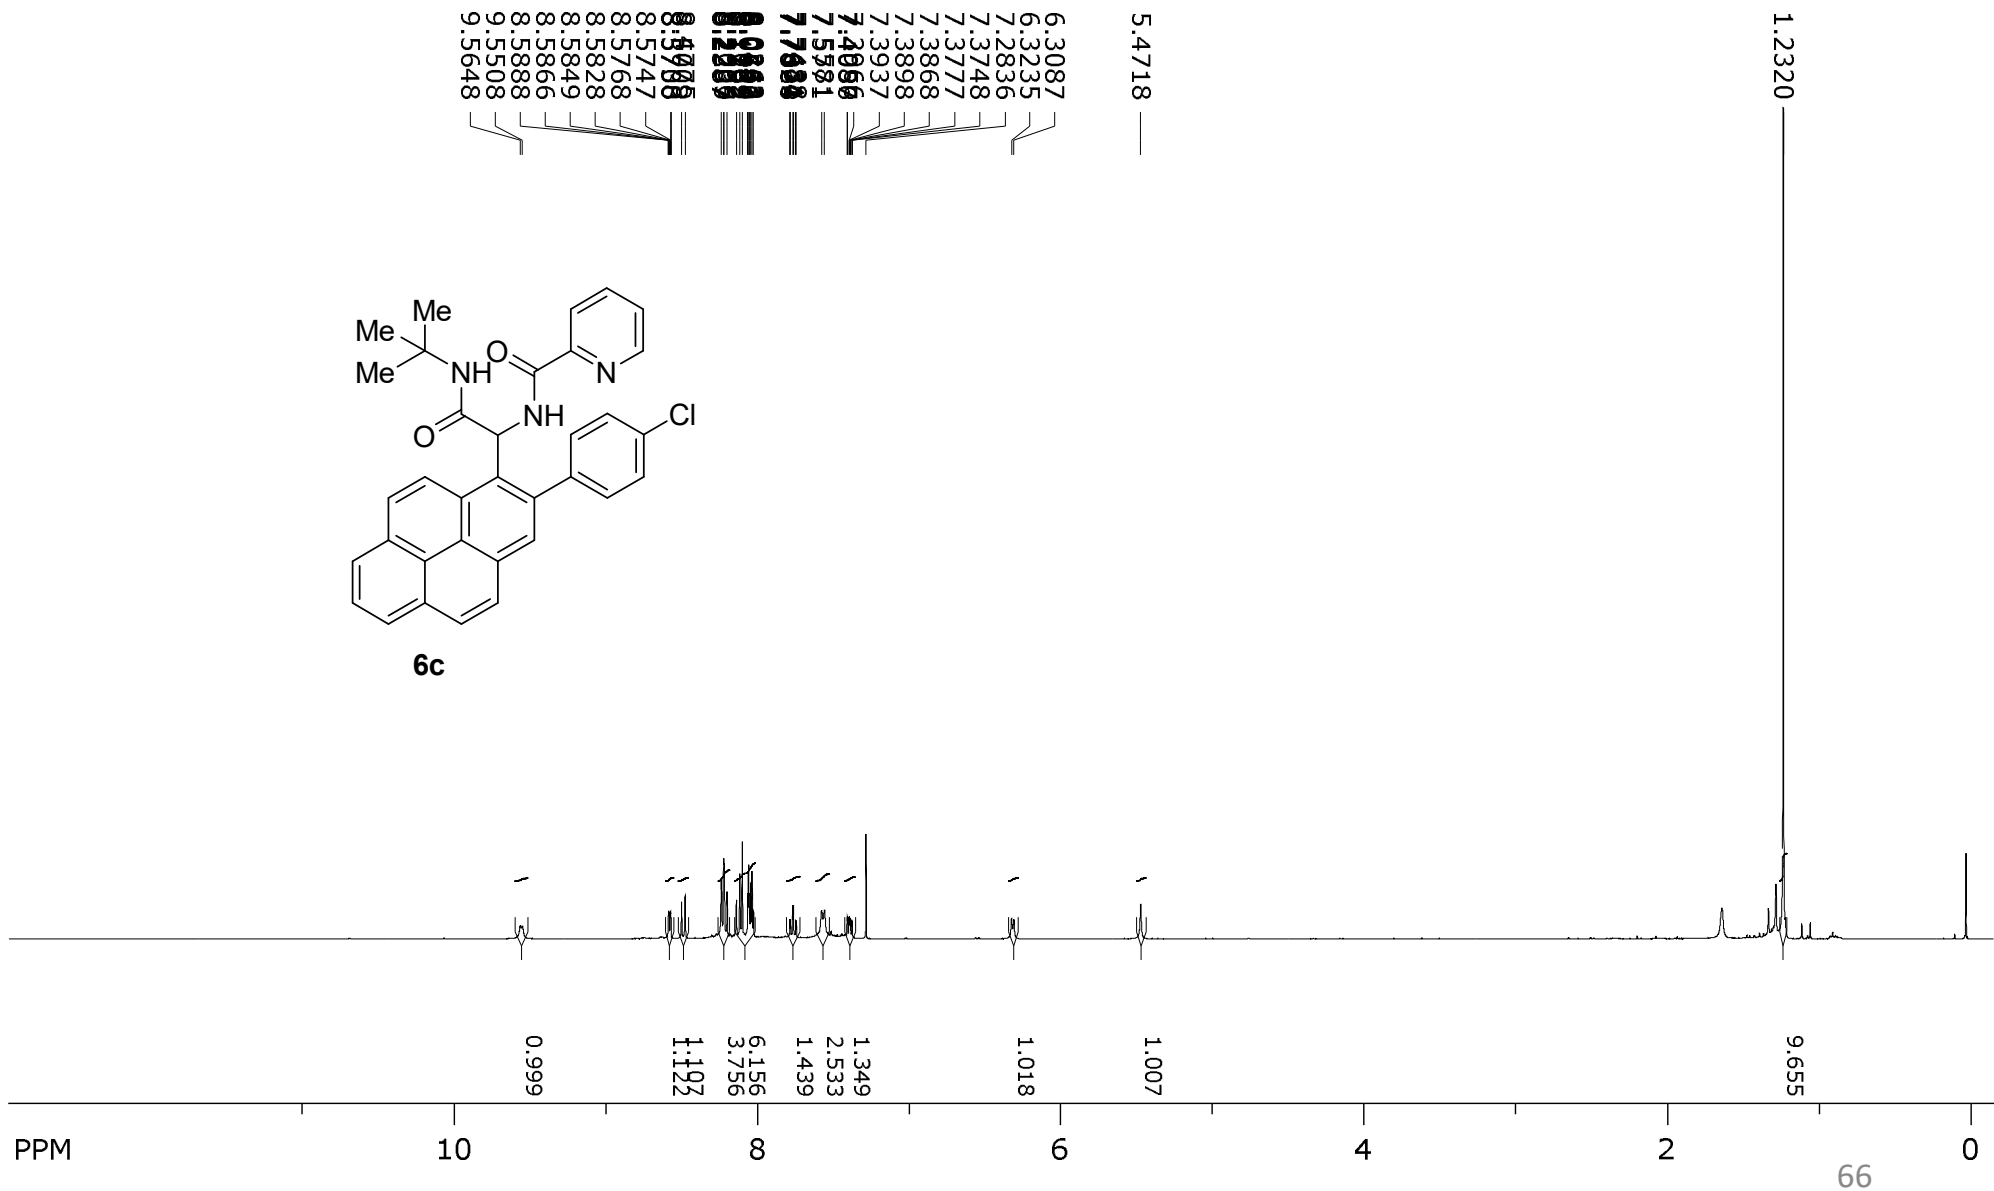

SpinWorks 4: AD 1813  
PROTON CDCl3 /opt/topspin3.5pl2/nmrdata nmrsu 23

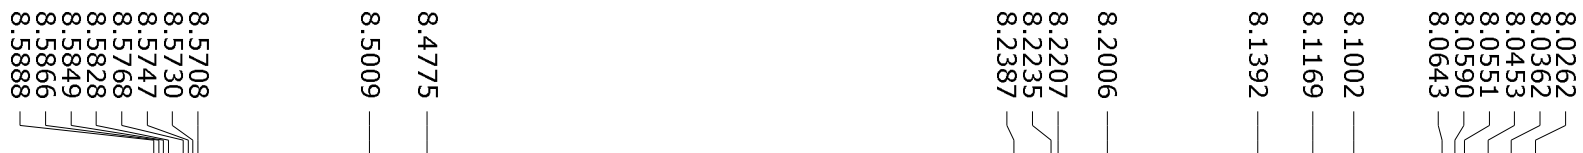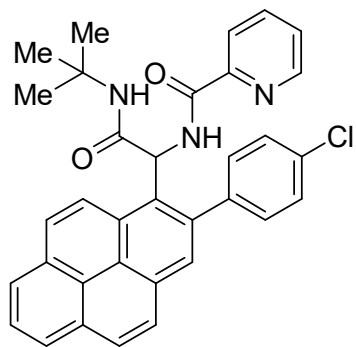

6c

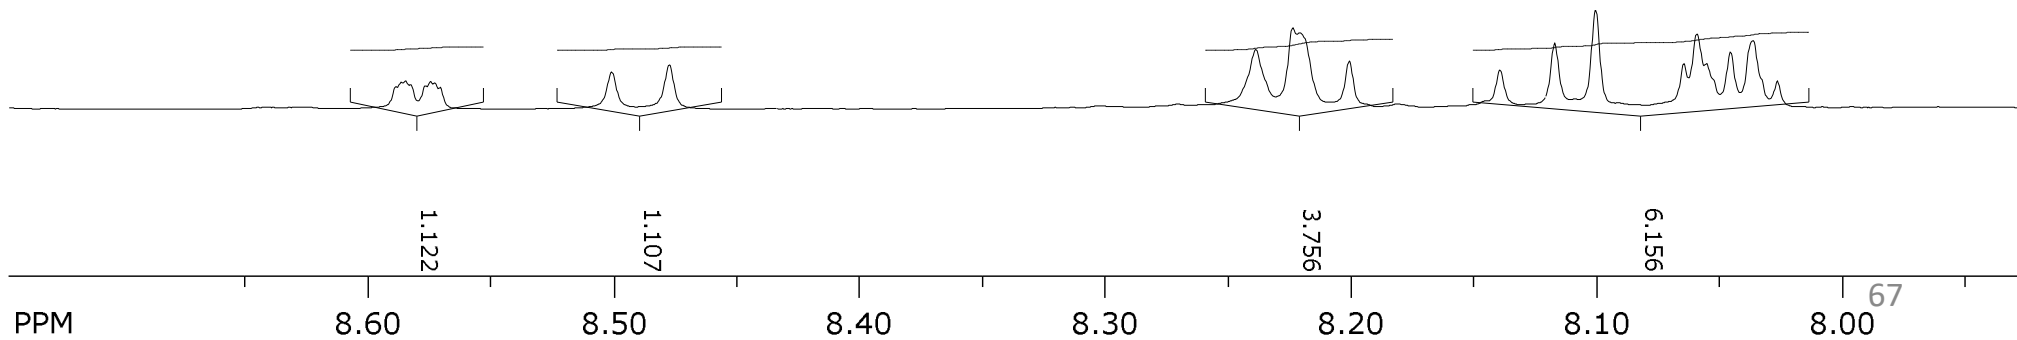

SpinWorks 4: AD 1813  
PROTON CDCl3 /opt/topspin3.5pl2/nmrdata nmrsu 23

7.7438  
7.7481  
7.7631  
7.7674  
7.7823  
7.7866

7.5581  
7.5771

7.3748  
7.3777  
7.3868  
7.3898  
7.3937  
7.3966  
7.4057  
7.4086

7.2836

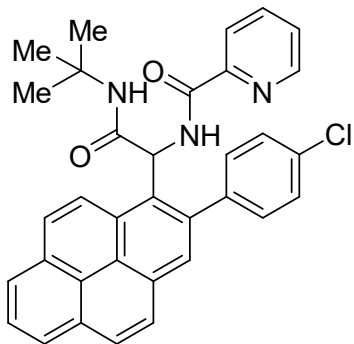

6c

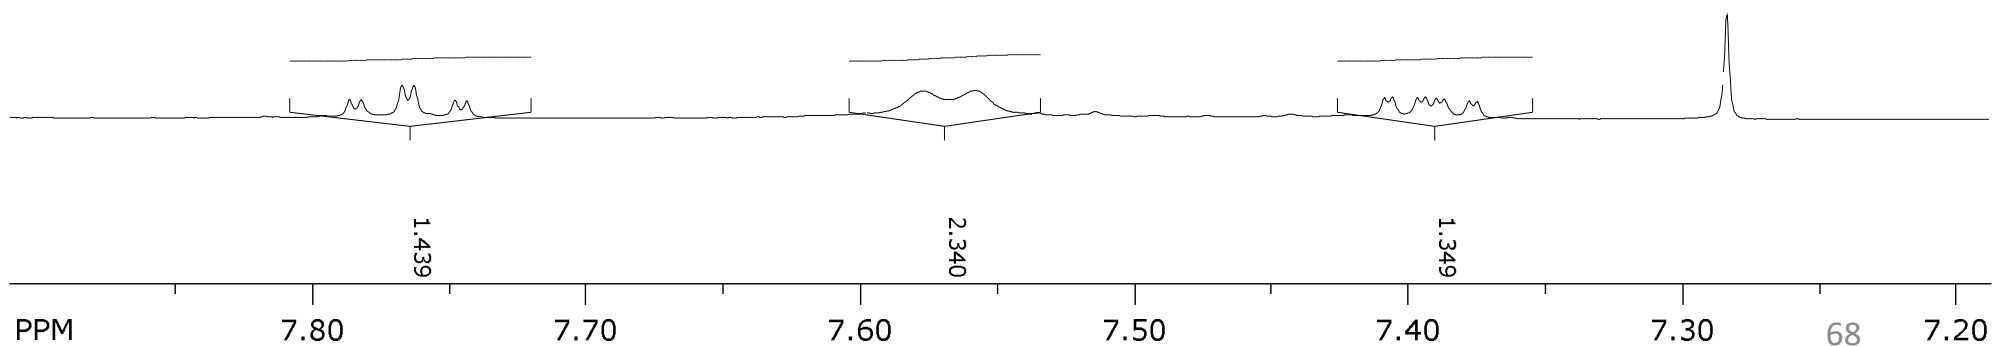

SpinWorks 4: AD 1813

C13CPD CDCl3 /opt/topspin3.5pl2/nmrdata nmrsu 23

122.063  
123.606  
124.623  
125.178  
125.694  
126.821  
128.239  
128.988  
129.088  
129.207  
130.477  
131.109  
131.143  
134.055  
137.132  
140.065  
140.185  
148.339  
149.520  
163.827  
169.406

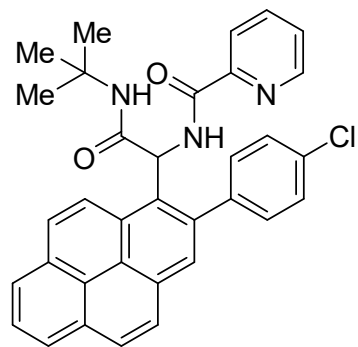

6c

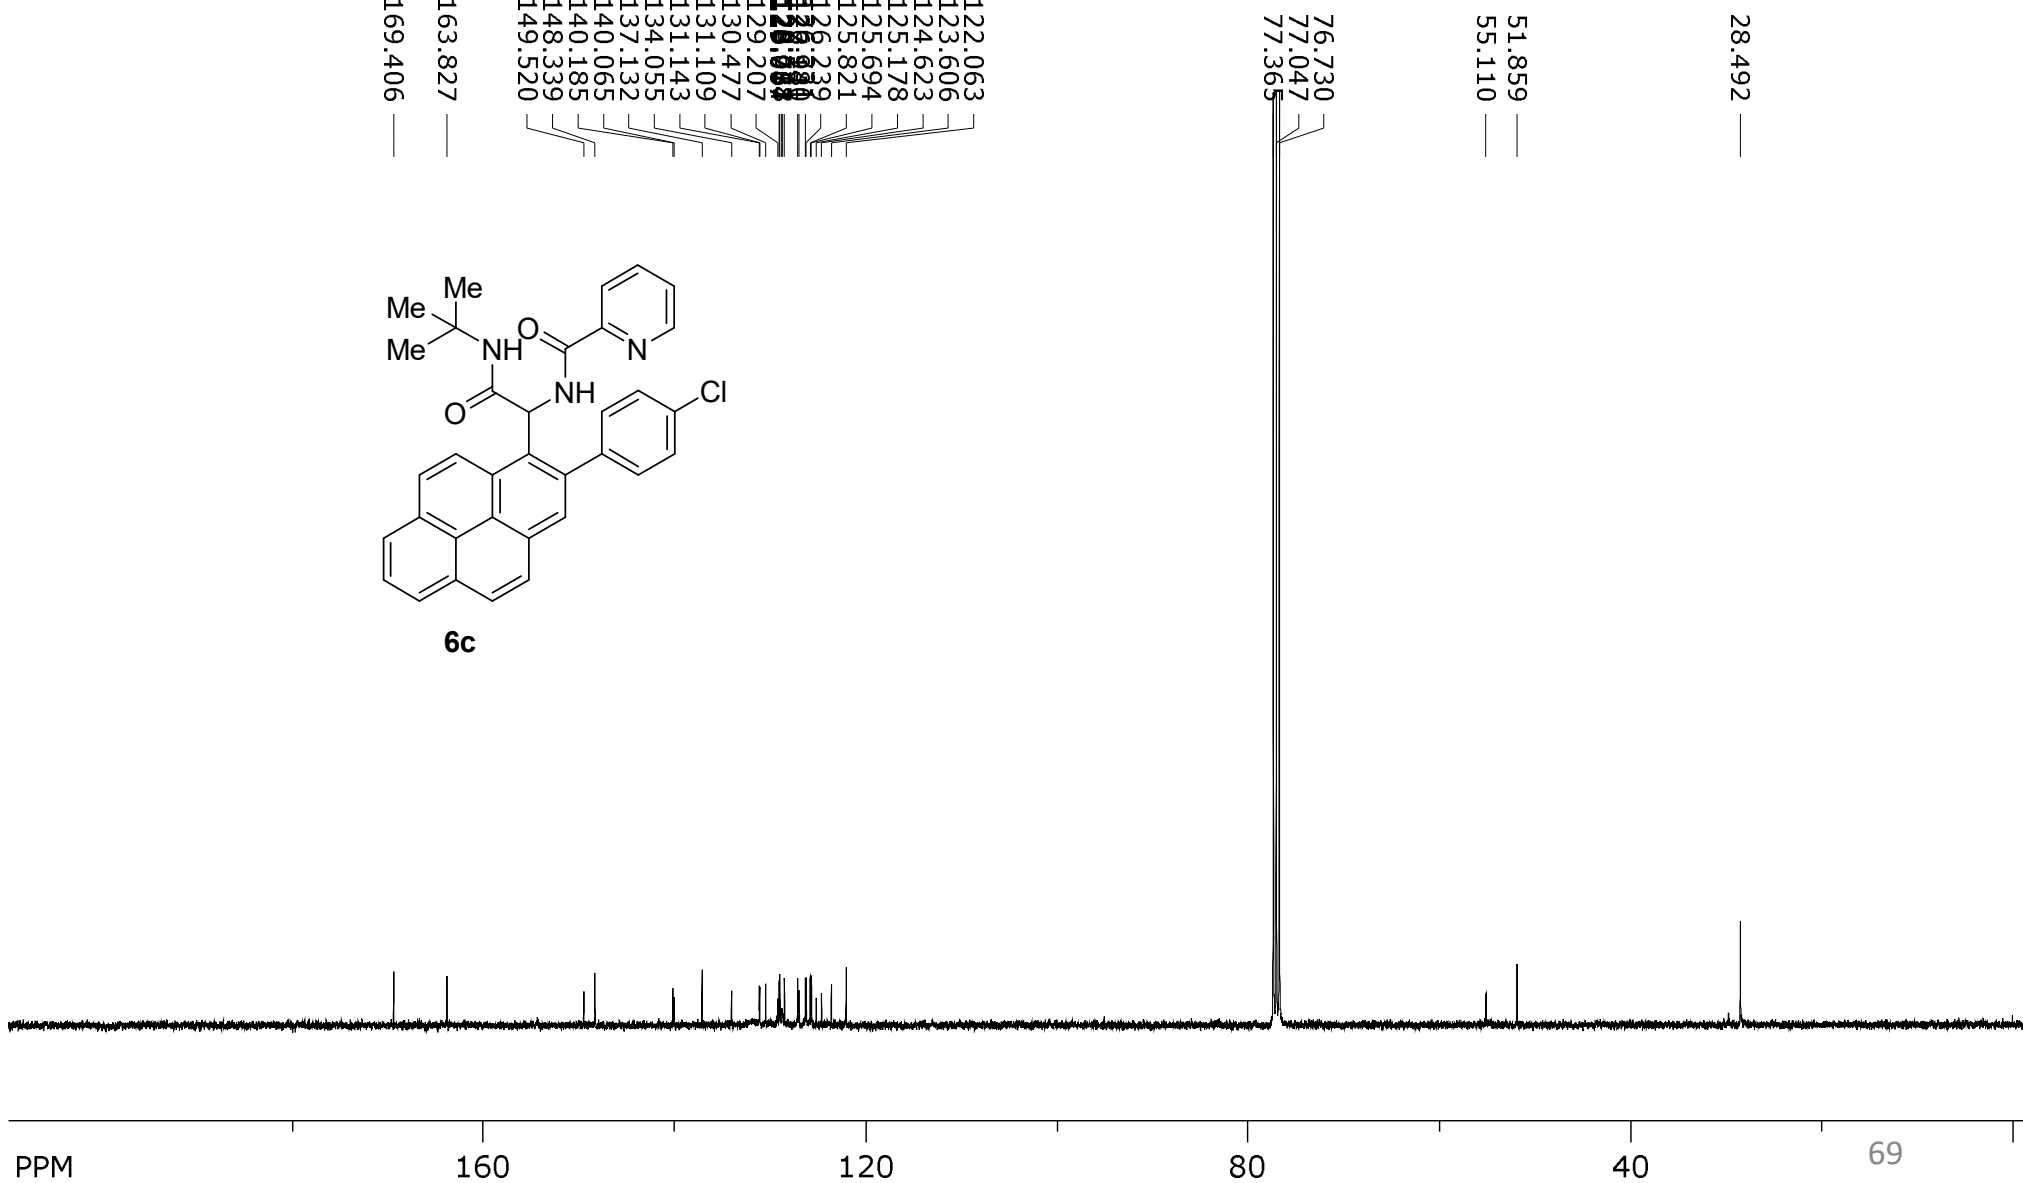

SpinWorks 4: AD 1813  
C13CPD CDCl3 /opt/topspin3.5pl2/nmrdata nmrsu 23

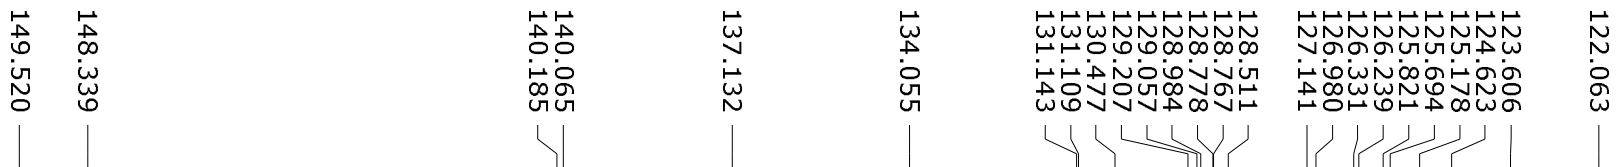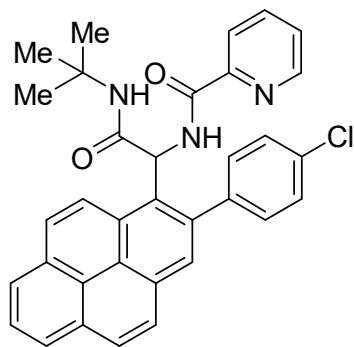

6c

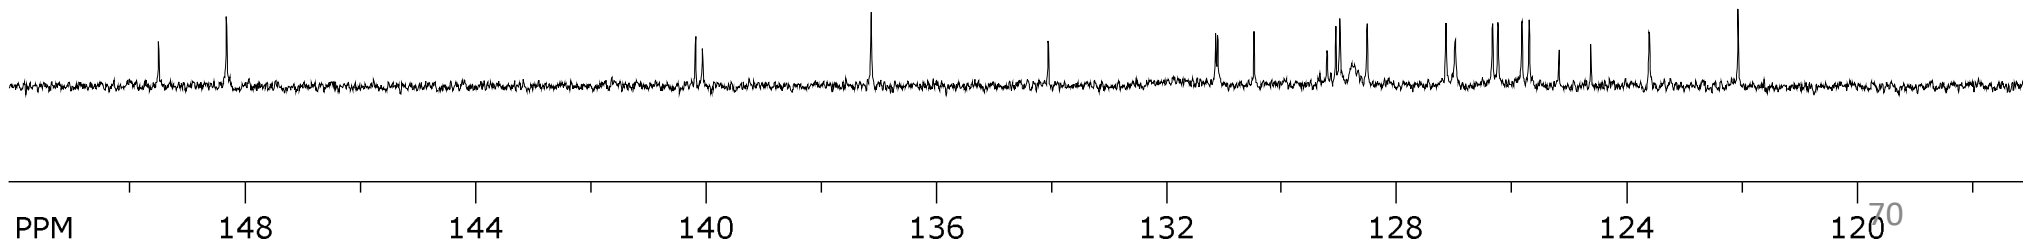



SpinWorks 4: AD-2084  
PROTON CDCl3 /opt/topspin3.5pl2/nmrdata nmrsu 34

9.5604  
9.5745

8.5721  
8.5742  
8.5759  
8.5780  
8.5841  
8.5861  
8.5877  
8.5898

8.4820  
8.5054

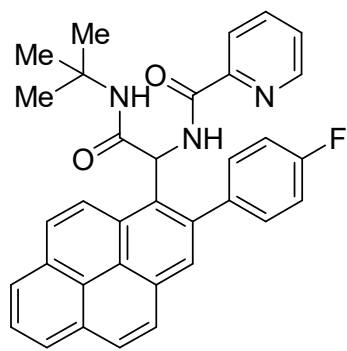

6d

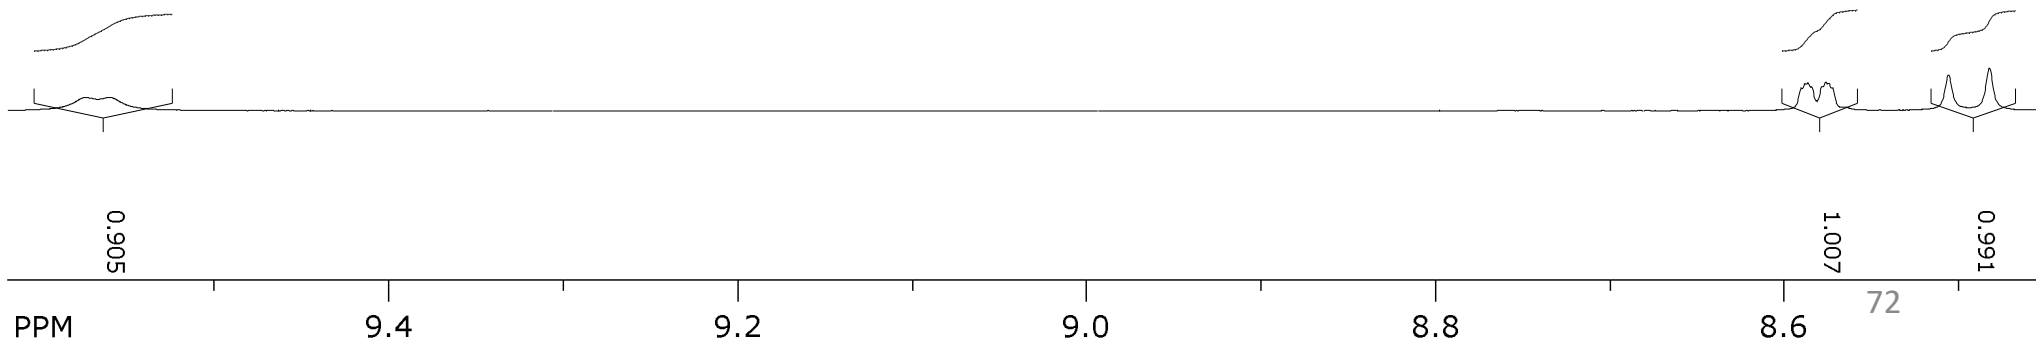



SpinWorks 4: AD-2084  
PROTON CDCl3 /opt/topspin3.5pl2/nmrdata nmrsu 34

8.2366  
8.2197  
8.1918  
8.1974

8.1381  
8.1164

8.0764  
8.0610  
8.0560  
8.0429  
8.0381  
8.0239

7.7436  
7.7478  
7.7629  
7.7671  
7.7821  
7.7863



6d

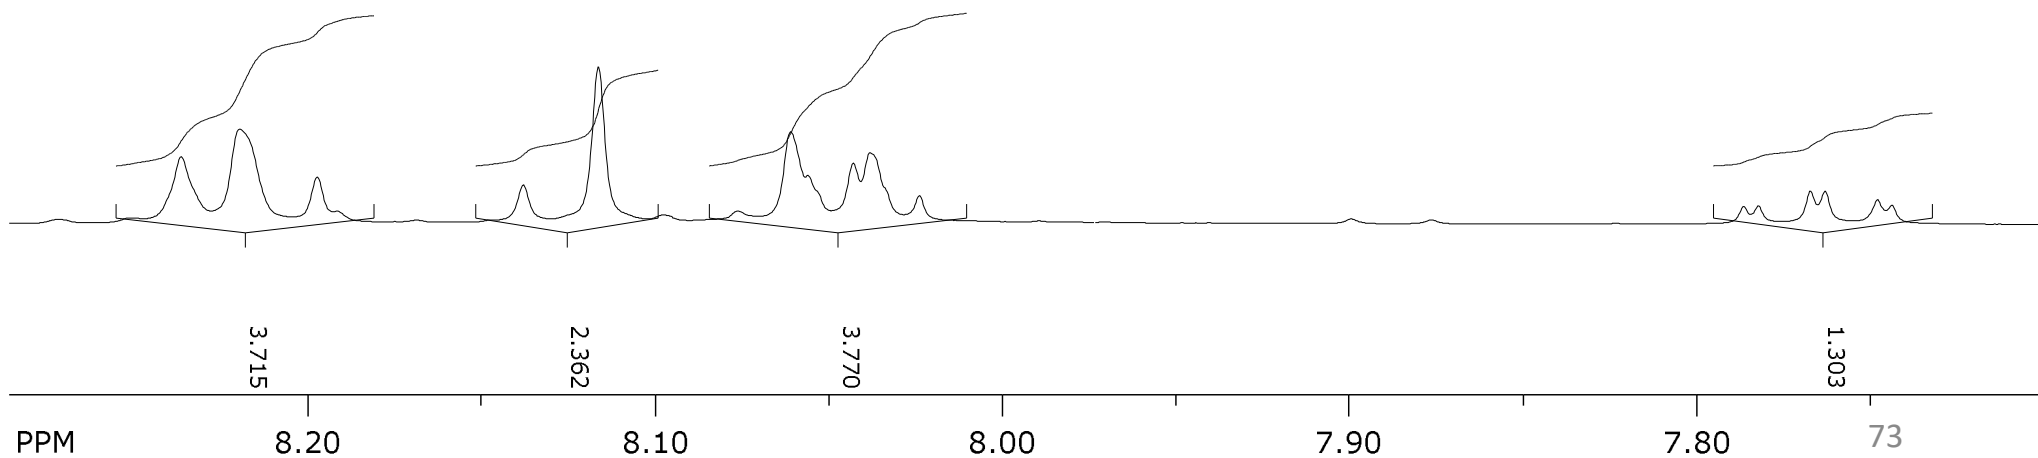

SpinWorks 4: AD-2084  
PROTON CDCl3 /opt/topspin3.5pl2/nmrdata nmrsu 34

7.3748  
7.3777  
7.3868  
7.3897  
7.3936  
7.3965  
7.4057  
7.4085

7.3009  
7.3036  
7.3054  
7.2836  
7.2665  
7.2719  
7.2585



6d

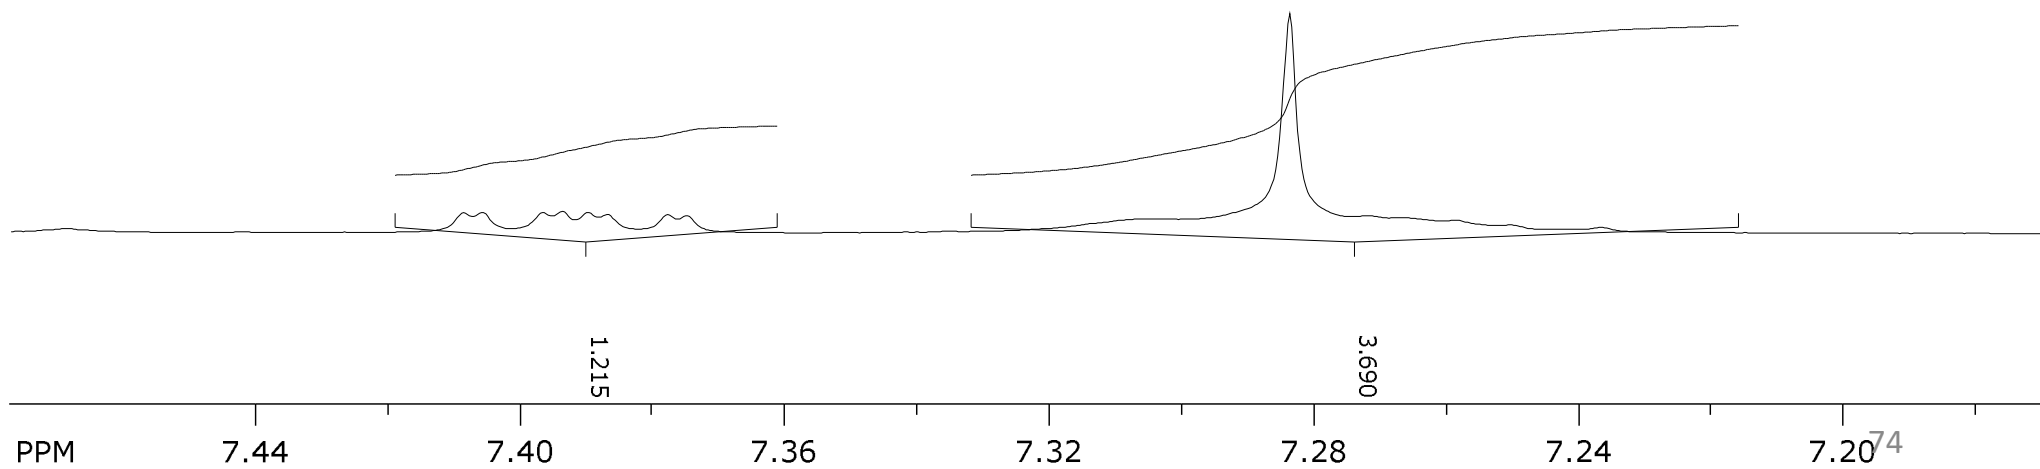

SpinWorks 4: AD-2084  
PROTON CDCl3 /opt/topspin3.5pl2/nmrdata nmrsu 34

6.3293  
6.3442

5.4681

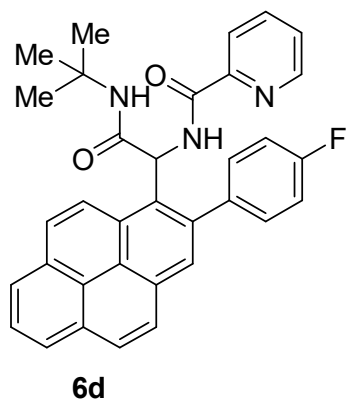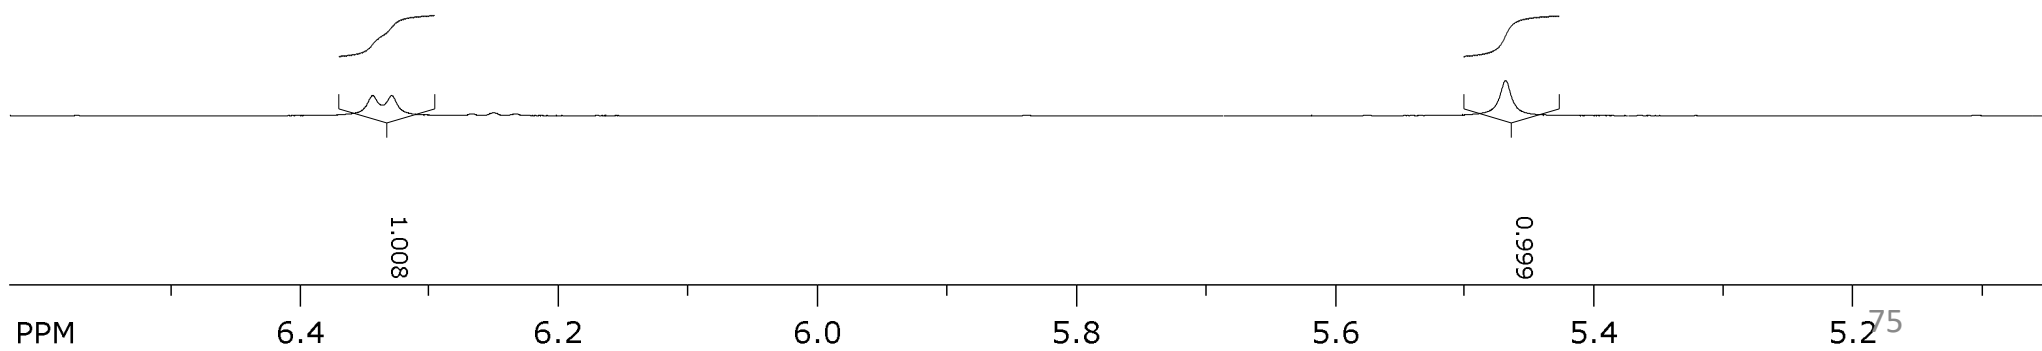



SpinWorks 4: AD-2084  
C13CPD256 CDCl3 /opt/topspin3.5pl2/nmrdata nmrsu 34

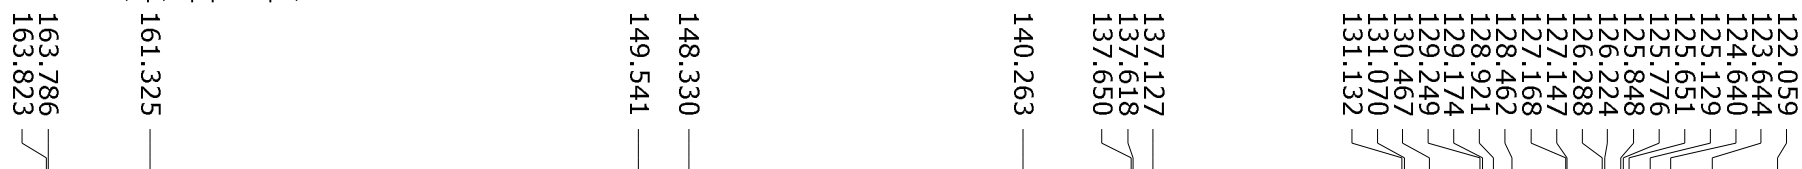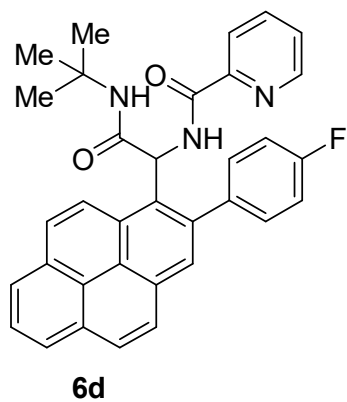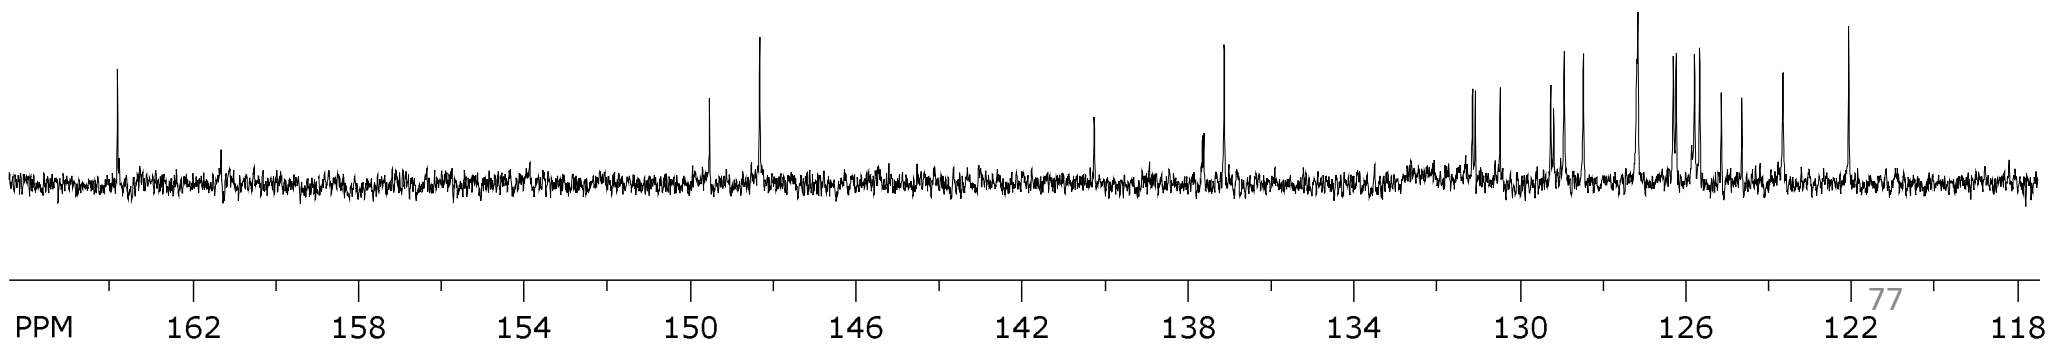

# $^{19}\text{F}$ NMR (~376 MHz, $\text{CDCl}_3$ )

SpinWorks 4: AD 2084

F19CPD CDCl3 /opt/topspin3.5pl2/nmrdata nmrsu 17

-114.369

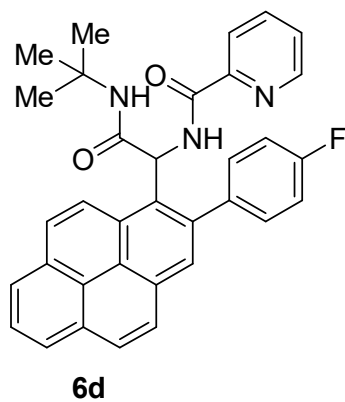

PPM

0

-40

-80

-120

-160

-200

78

SpinWorks 4: SUB-45  
PROTON CDCl3 /opt/topspin3.5pl2/nmrdata nmrsu 18

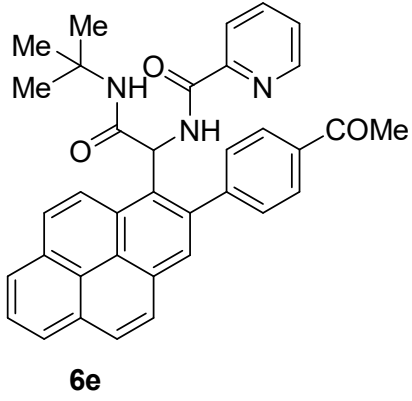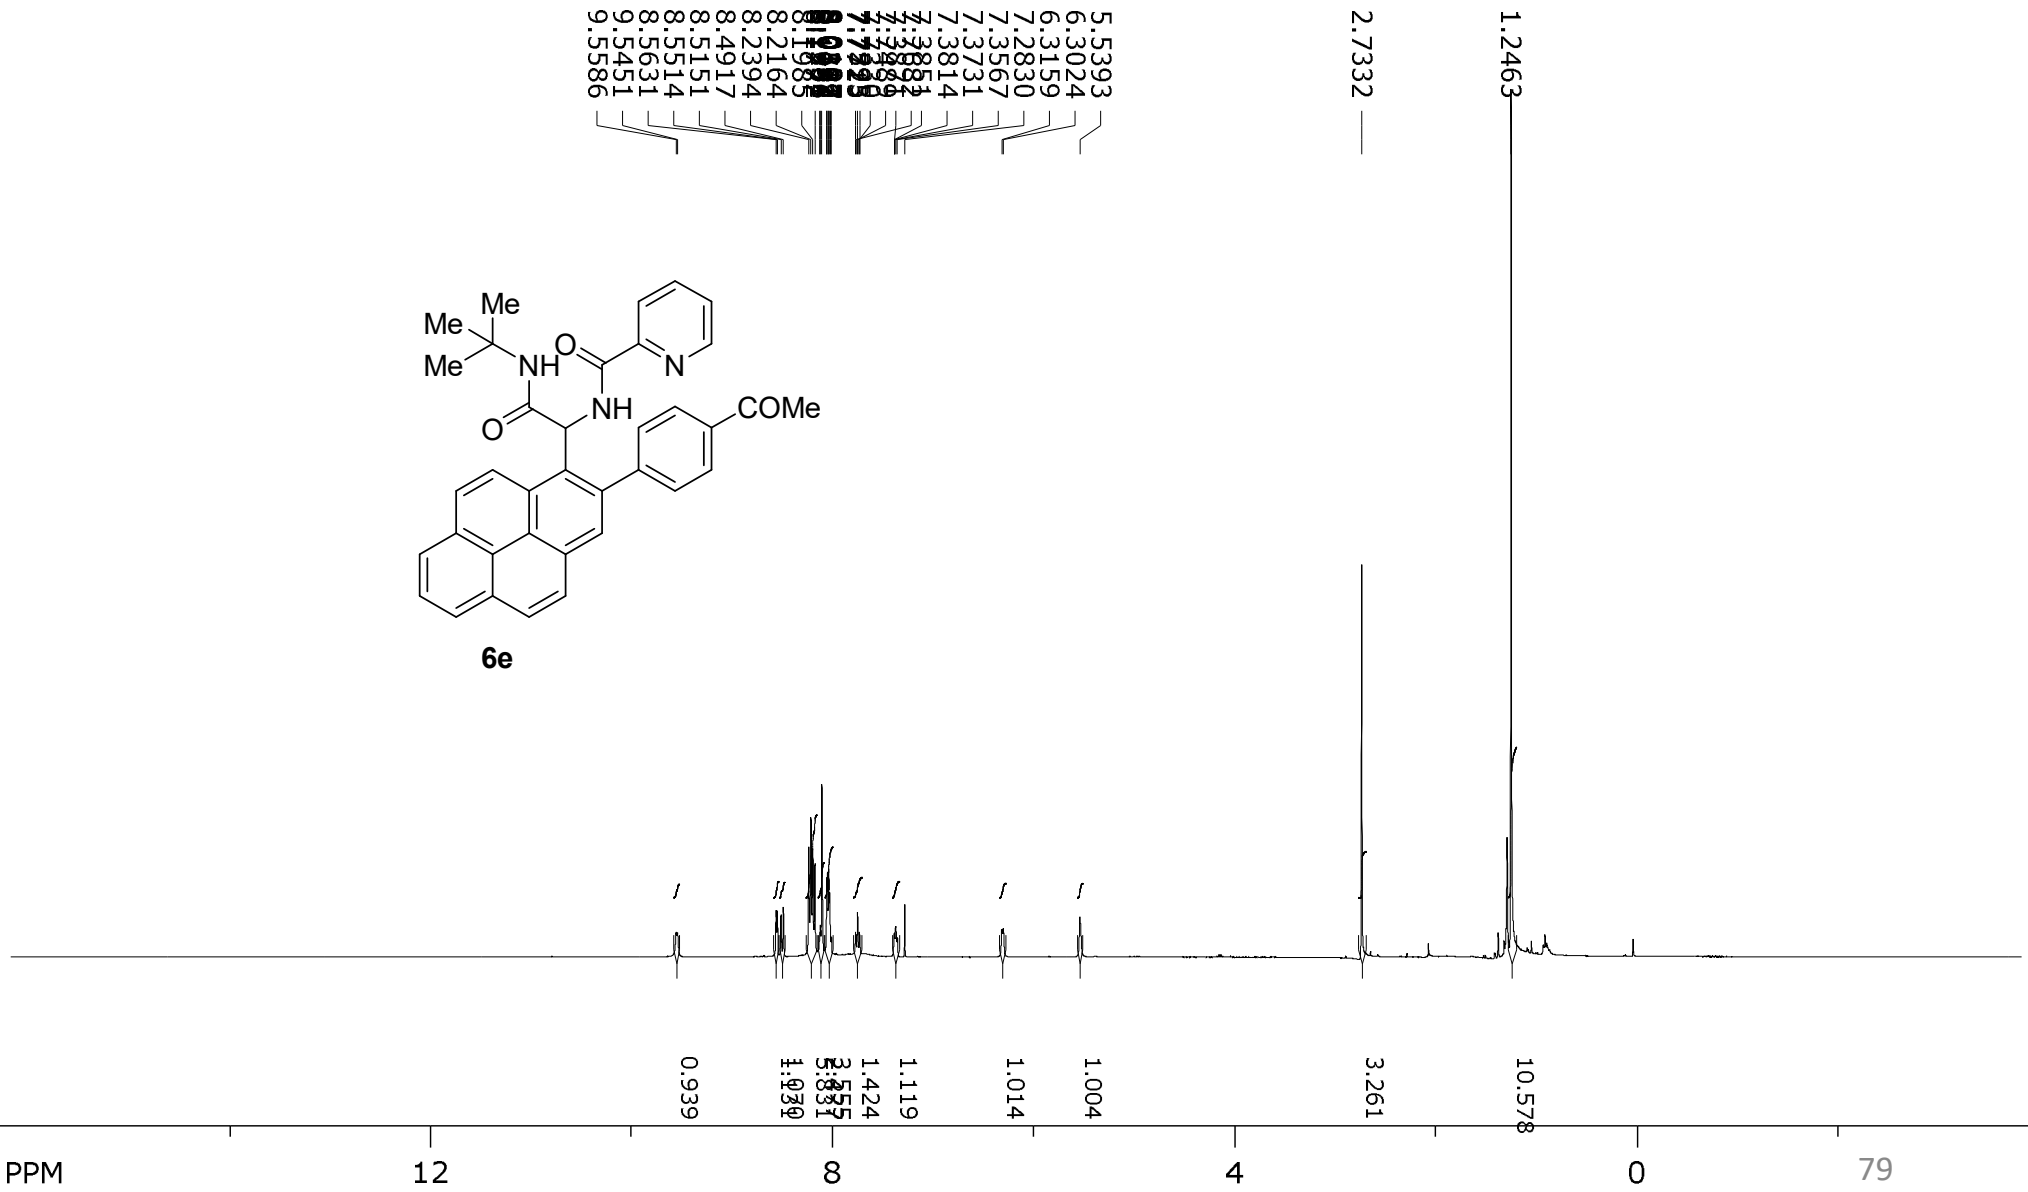

SpinWorks 4: SUB-45  
PROTON CDCl3 /opt/topspin3.5pl2/nmrdata nmrsu 18

9.5451  
9.5586

8.4917  
8.5151  
8.5514  
8.5631

8.0127  
8.0187  
8.0317  
8.0397  
8.0499  
8.0573  
8.1082  
8.1301  
8.1772  
8.2164  
8.2394

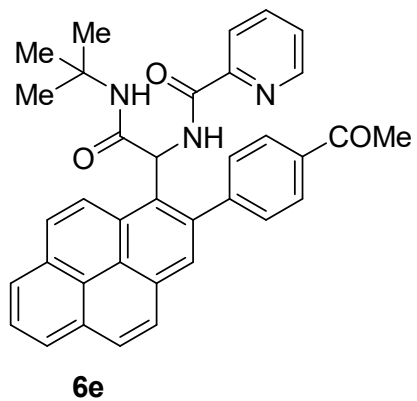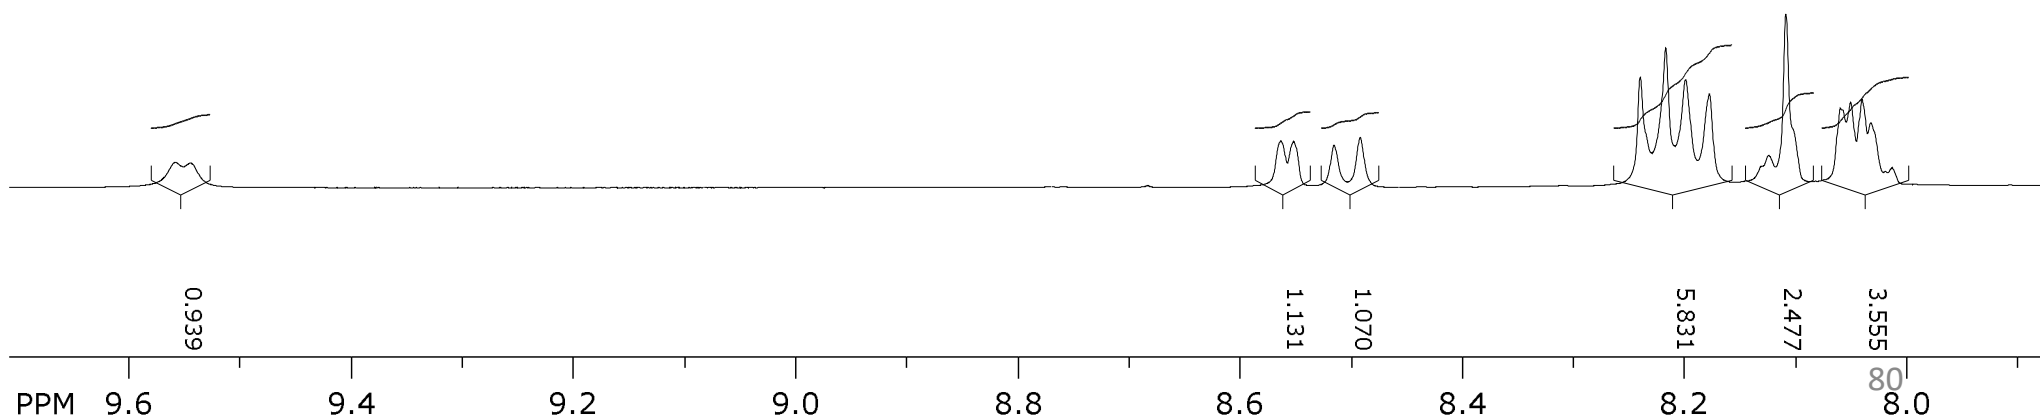



SpinWorks 4: SUB-45  
PROTON CDCl3 /opt/topspin3.5pl2/nmrdata nmrsu 18

7.7715 —  
7.7682 —

7.7523 —  
7.7489 —

7.7330 —  
7.7295 —

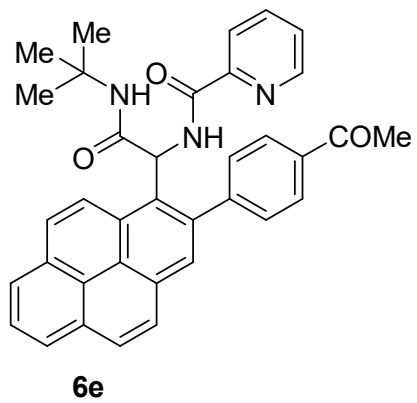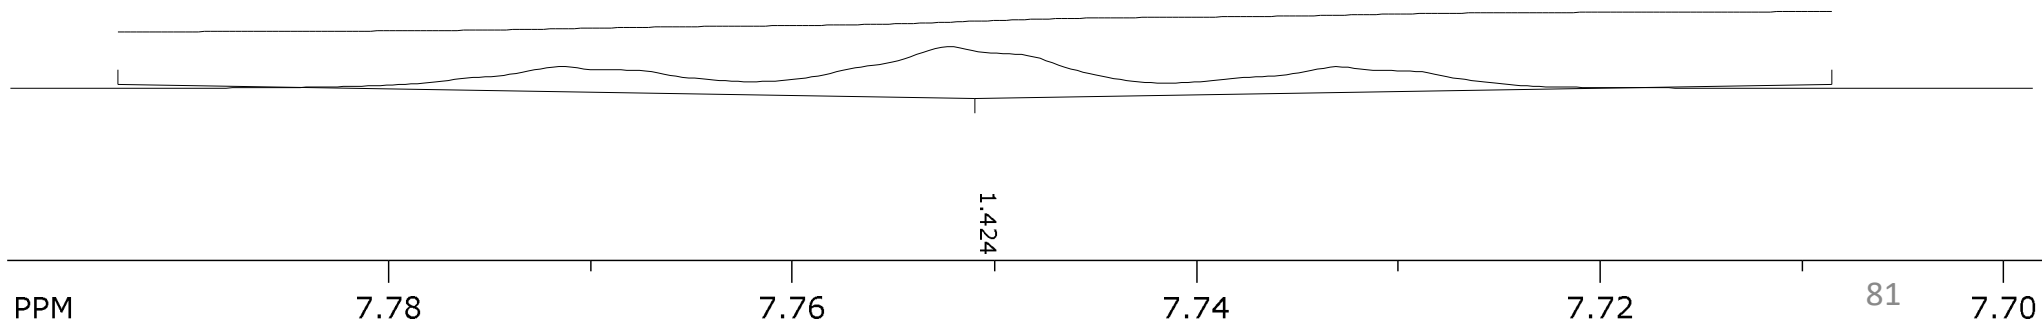

SpinWorks 4: SUB-45  
PROTON CDCl3 /opt/topspin3.5pl2/nmrdata nmrsu 18

7.2830  
7.3567  
7.3731  
7.3814  
7.3851  
7.3871

6.3024  
6.3159

5.5393

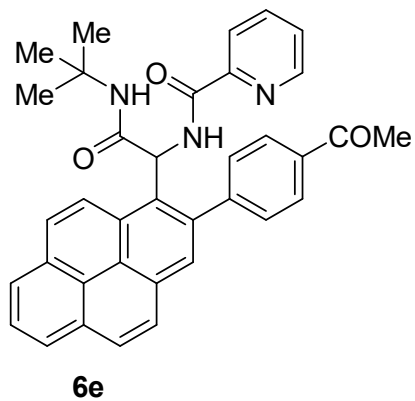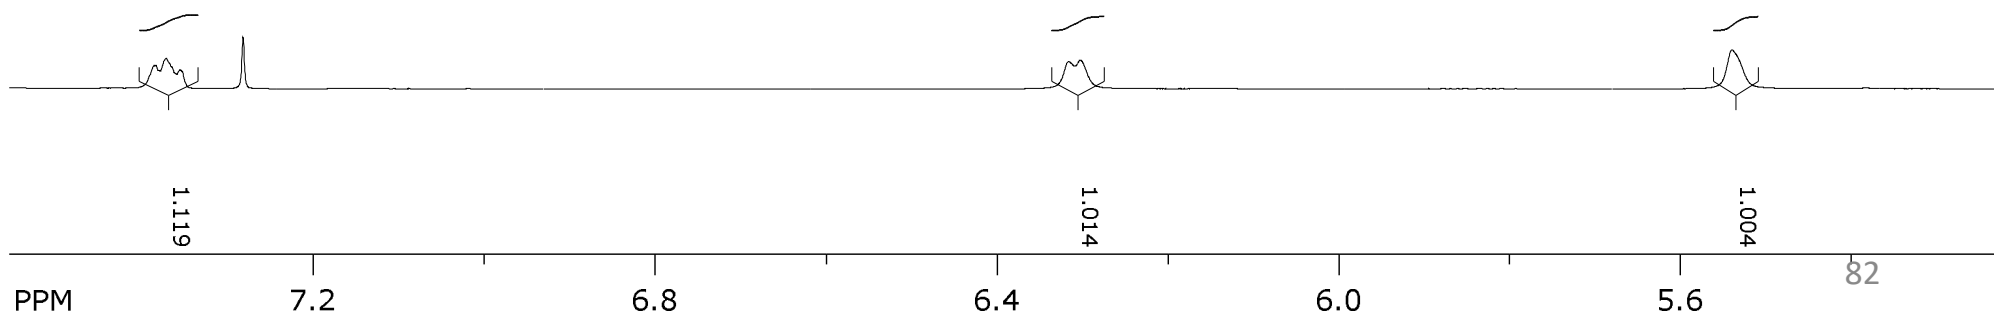

SpinWorks 4: SUB-45  
C13CPD256 CDCl3 /opt/topspin3.5pl2/nmrdata nmrsu 18

197.878  
169.346  
163.838  
149.436  
148.297  
146.734  
140.221  
137.113  
136.318  
131.108  
130.447  
129.225  
129.076  
128.969  
128.889  
126.243  
125.875  
125.727  
125.240  
124.555  
123.503  
122.051  
76.742  
77.060  
77.378  
55.154  
51.870  
28.471  
26.803

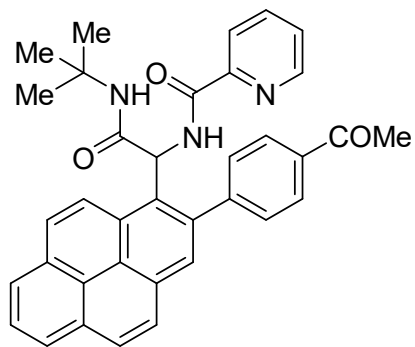

6e

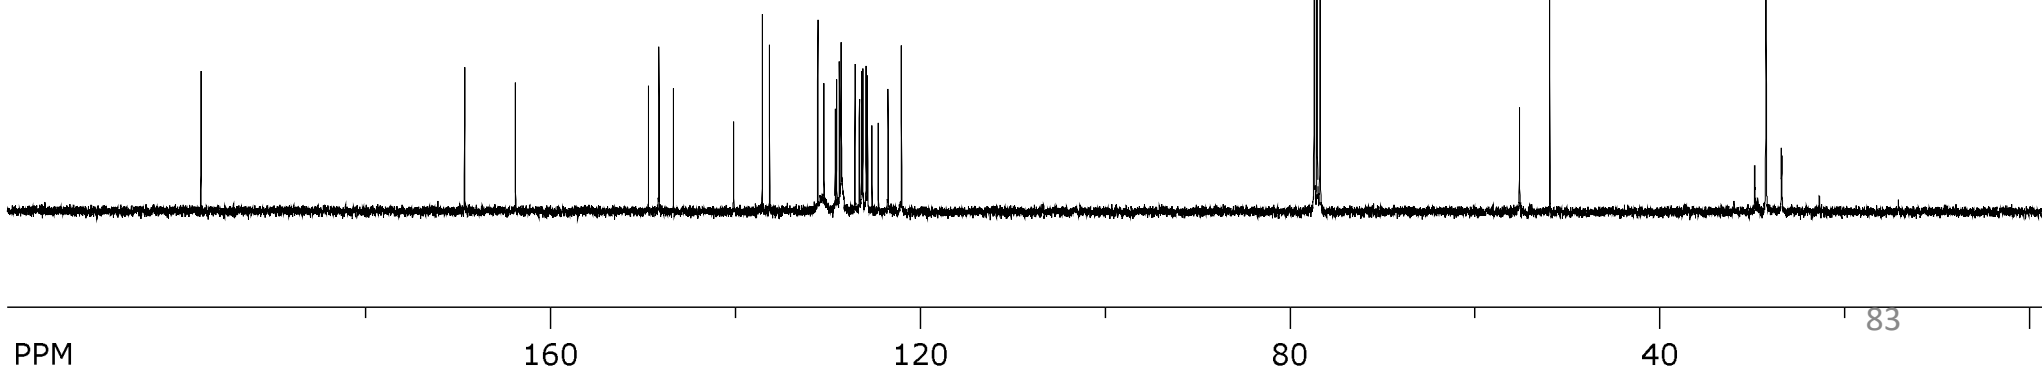

SpinWorks 4: SUB-45  
C13CPD256 CDCl3 /opt/topspin3.5pl2/nmrdata nmrsu 18

169.346

163.838

149.436

148.297

146.734

140.221

136.318  
137.113

122.051  
123.503  
124.555  
125.240  
125.727  
125.875  
126.243  
126.374  
126.604  
127.087  
128.569  
128.763  
129.076  
129.225  
130.447  
131.108



6e

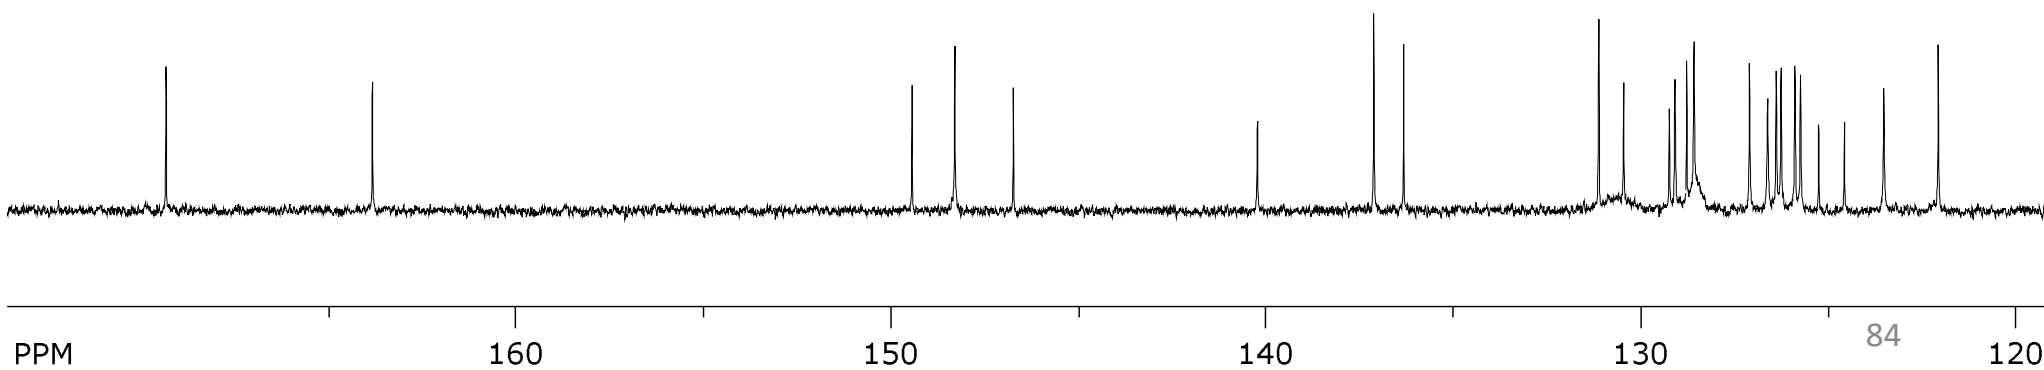

SpinWorks 4: AD-2082  
PROTON CDCl3 /opt/topspin3.5pl2/nmrdata nmrsu 58

5.6157  
6.2583  
6.2736  
7.2832  
7.3755  
7.3877  
7.3904  
7.3918  
7.4043  
7.4063  
7.7888  
7.7888  
7.7888  
7.7888  
7.7888  
8.1988  
8.2170  
8.4210  
8.4418  
8.4567  
8.4802  
8.5396  
8.5511  
9.4664  
9.4810

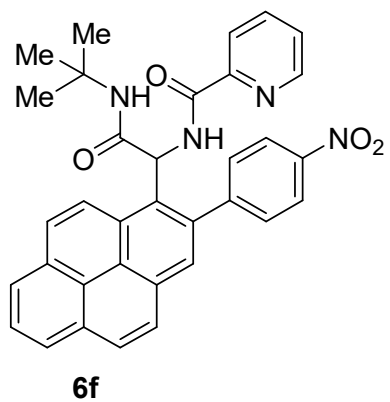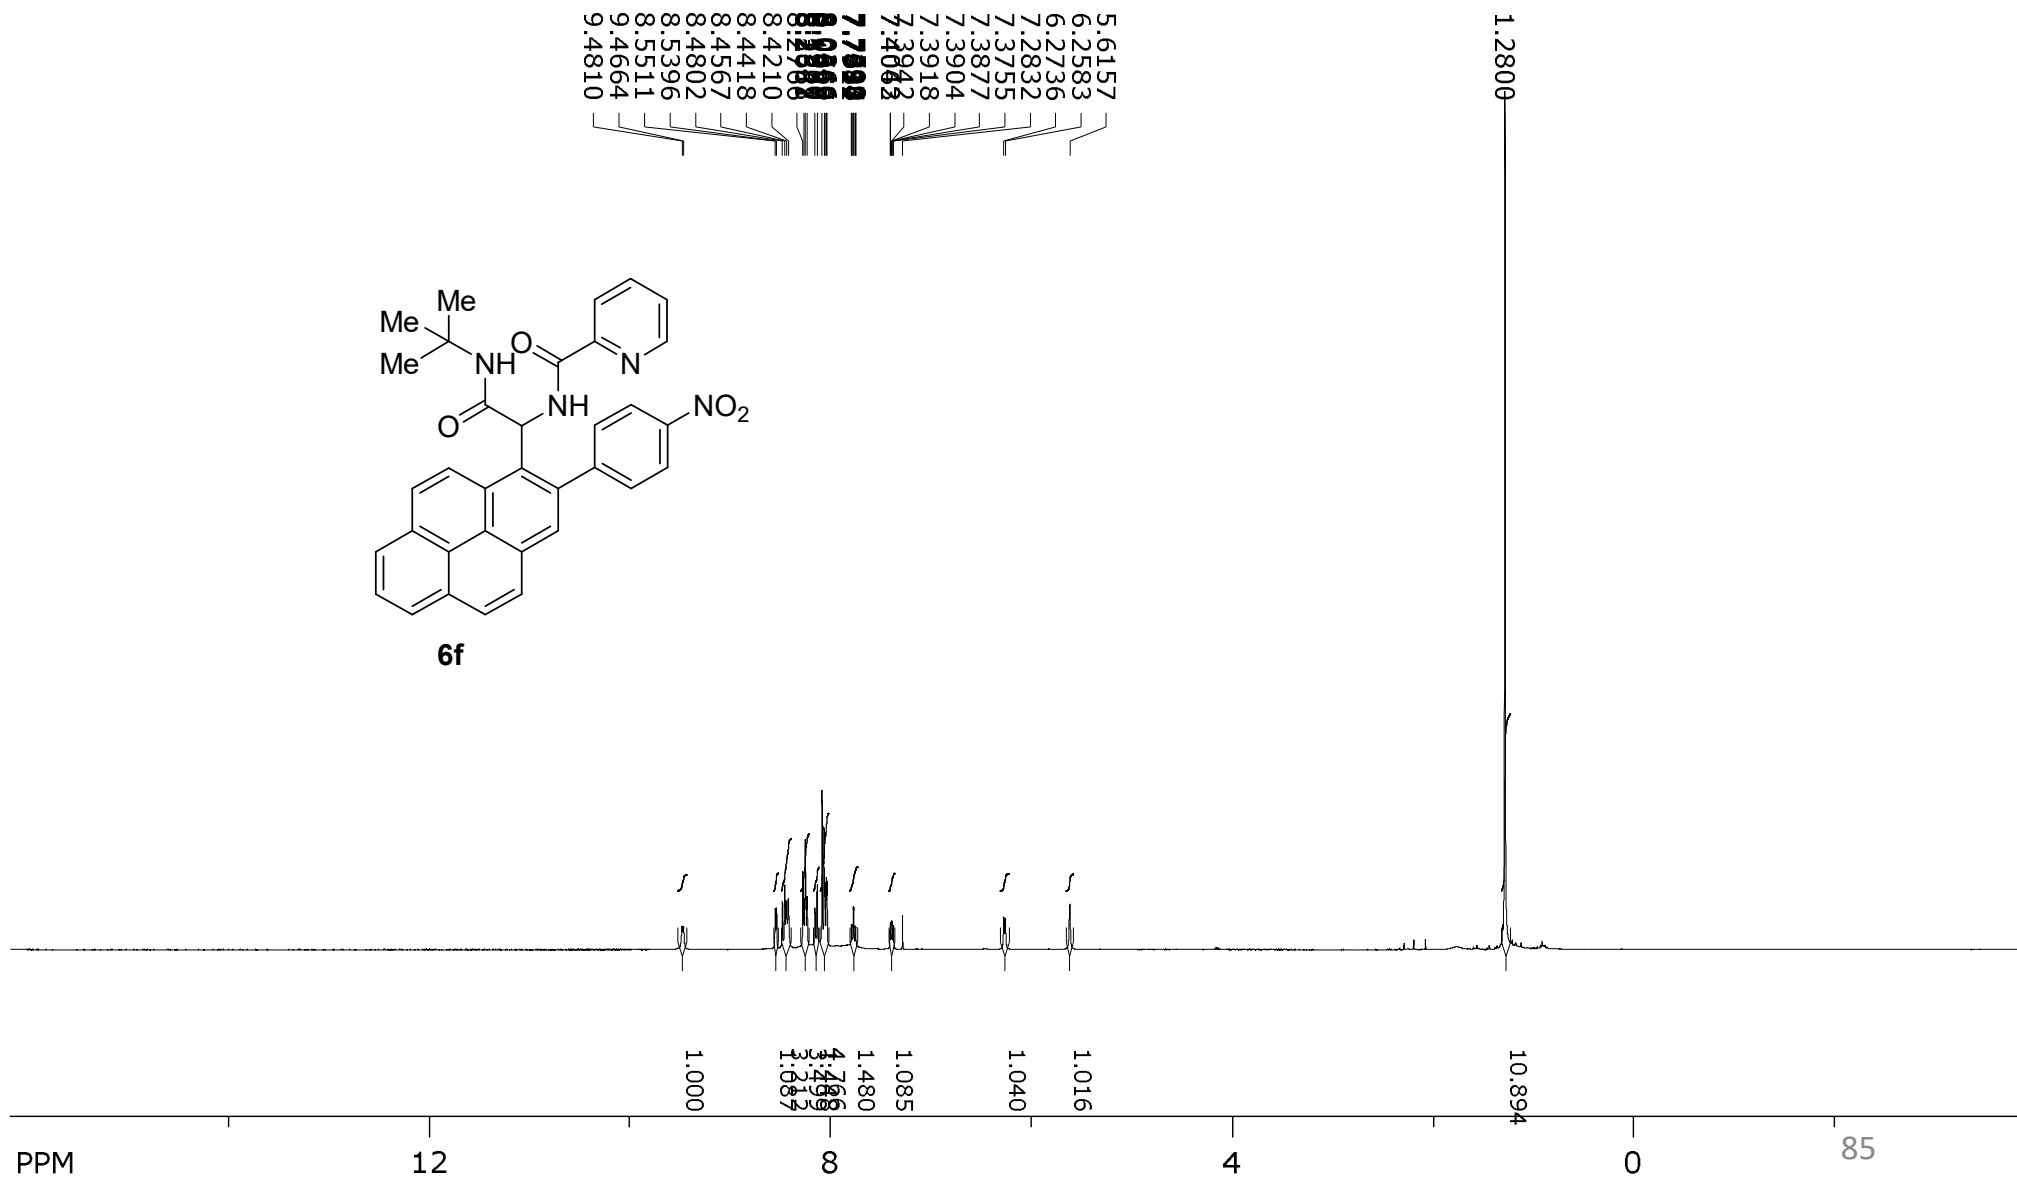

SpinWorks 4: AD-2082  
PROTON CDCl3 /opt/topspin3.5pl2/nmrdata nmrsu 58

9.4664  
9.4810

8.4210  
8.4418  
8.4567  
8.4802  
8.5396  
8.5511

8.2347  
8.2531  
8.2663  
8.1560  
8.1337  
8.0852  
8.0655  
8.0562  
8.0440  
8.0366

7.7499  
7.7537  
7.7698  
7.7730  
7.7884  
7.7922

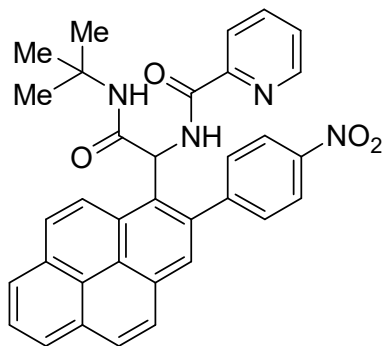

6f

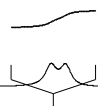

1.000

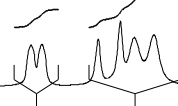

1.087

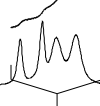

3.212

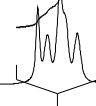

3.499

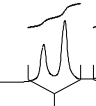

1.448

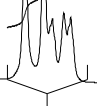

4.766

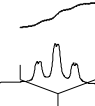

1.480

PPM

9.2

8.8

8.4

8.0

86

7.6

SpinWorks 4: AD-2082  
PROTON CDCl3 /opt/topspin3.5pl2/nmrdata nmrsu 58

7.2832  
7.3755  
7.3877  
7.3904  
7.3918  
7.3942  
7.4043  
7.4062

6.2583  
6.2736

5.6157

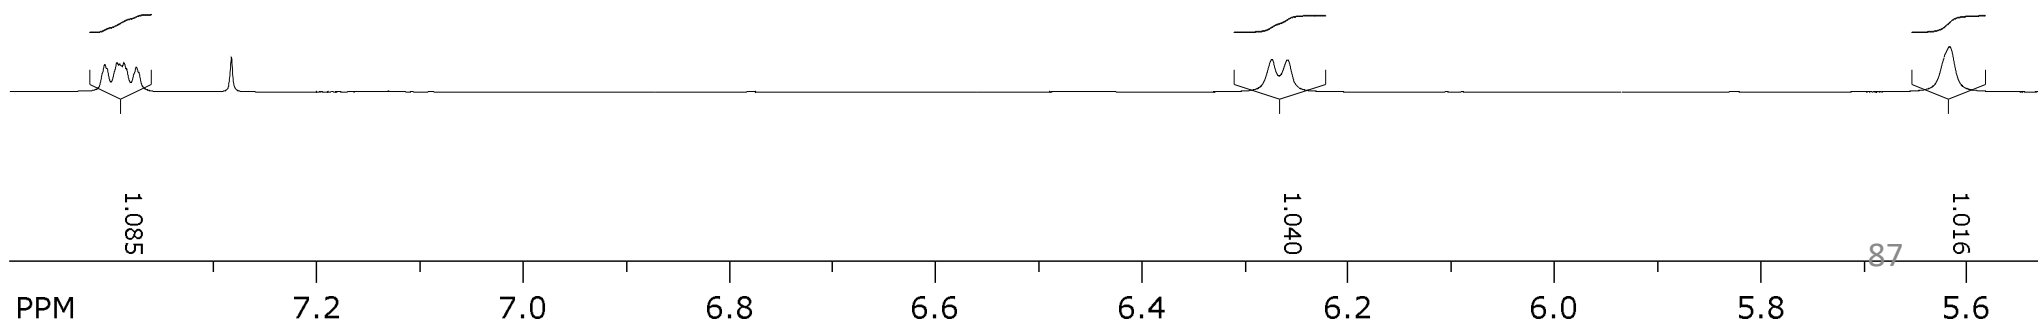

SpinWorks 4: AD-2082  
C13CPD256 CDCl3 /opt/topspin3.5pl2/nmrdata nmrsu 58

122.152  
123.217  
123.655  
123.674  
124.526  
125.428  
125.952  
128.830  
129.347  
129.453  
130.488  
131.173  
131.203  
137.260  
139.096  
147.493  
148.365  
148.667  
149.219  
163.999  
169.306

76.768  
77.086  
77.404

52.019  
55.060

28.518

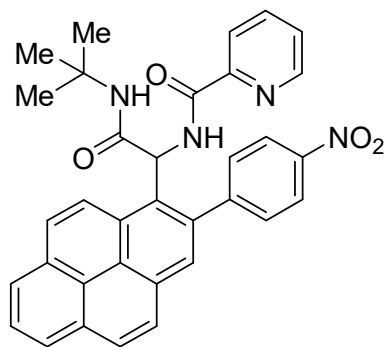

6f

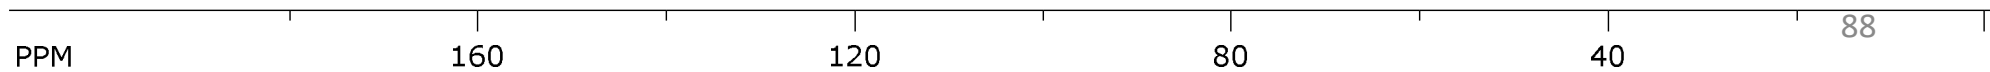



SpinWorks 4: AD-2082  
C13CPD256 CDCl3 /opt/topspin3.5p12/nmrdata nmrsu 58

147.493 —  
148.365 —  
148.667 —  
149.219 —

139.096 —

137.260 —

128.630 —  
128.850 —  
129.347 —  
129.453 —  
130.488 —  
131.173 —  
131.203 —

122.152 —  
123.217 —  
123.655 —  
123.674 —  
124.526 —  
125.428 —  
125.952 —  
126.141 —  
126.416 —  
126.447 —  
126.609 —  
127.034 —

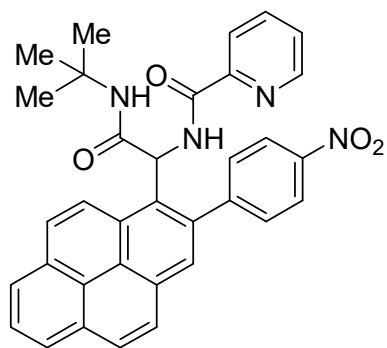

**6f**

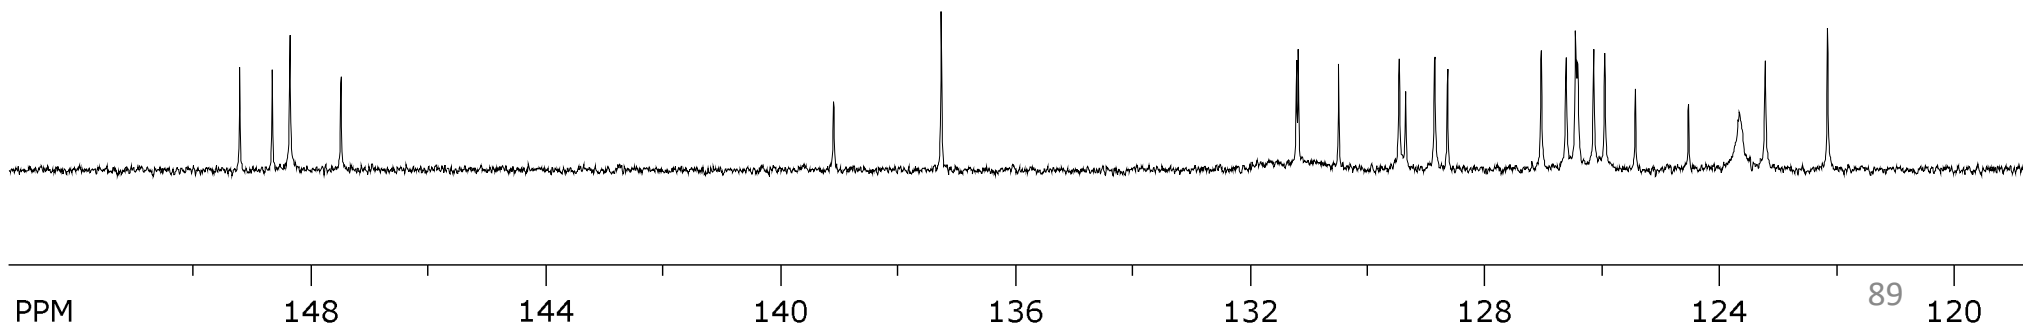

SpinWorks 4: AD 1946  
PROTON CDCl3 /opt/topspin3.5pl2/nmrdata nmrsu 13

10.1750  
9.5275  
9.5135  
8.5575  
8.5457  
8.5047  
8.4814  
8.2522  
8.2293  
8.2188  
8.1988  
8.1788  
7.7888  
7.7688  
7.3988  
7.3776  
7.3748  
7.3654  
7.3627  
7.2832  
6.3081  
6.2940  
5.5591

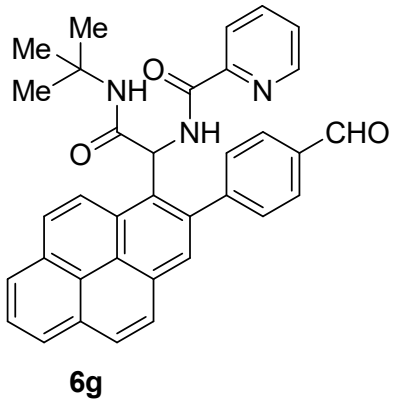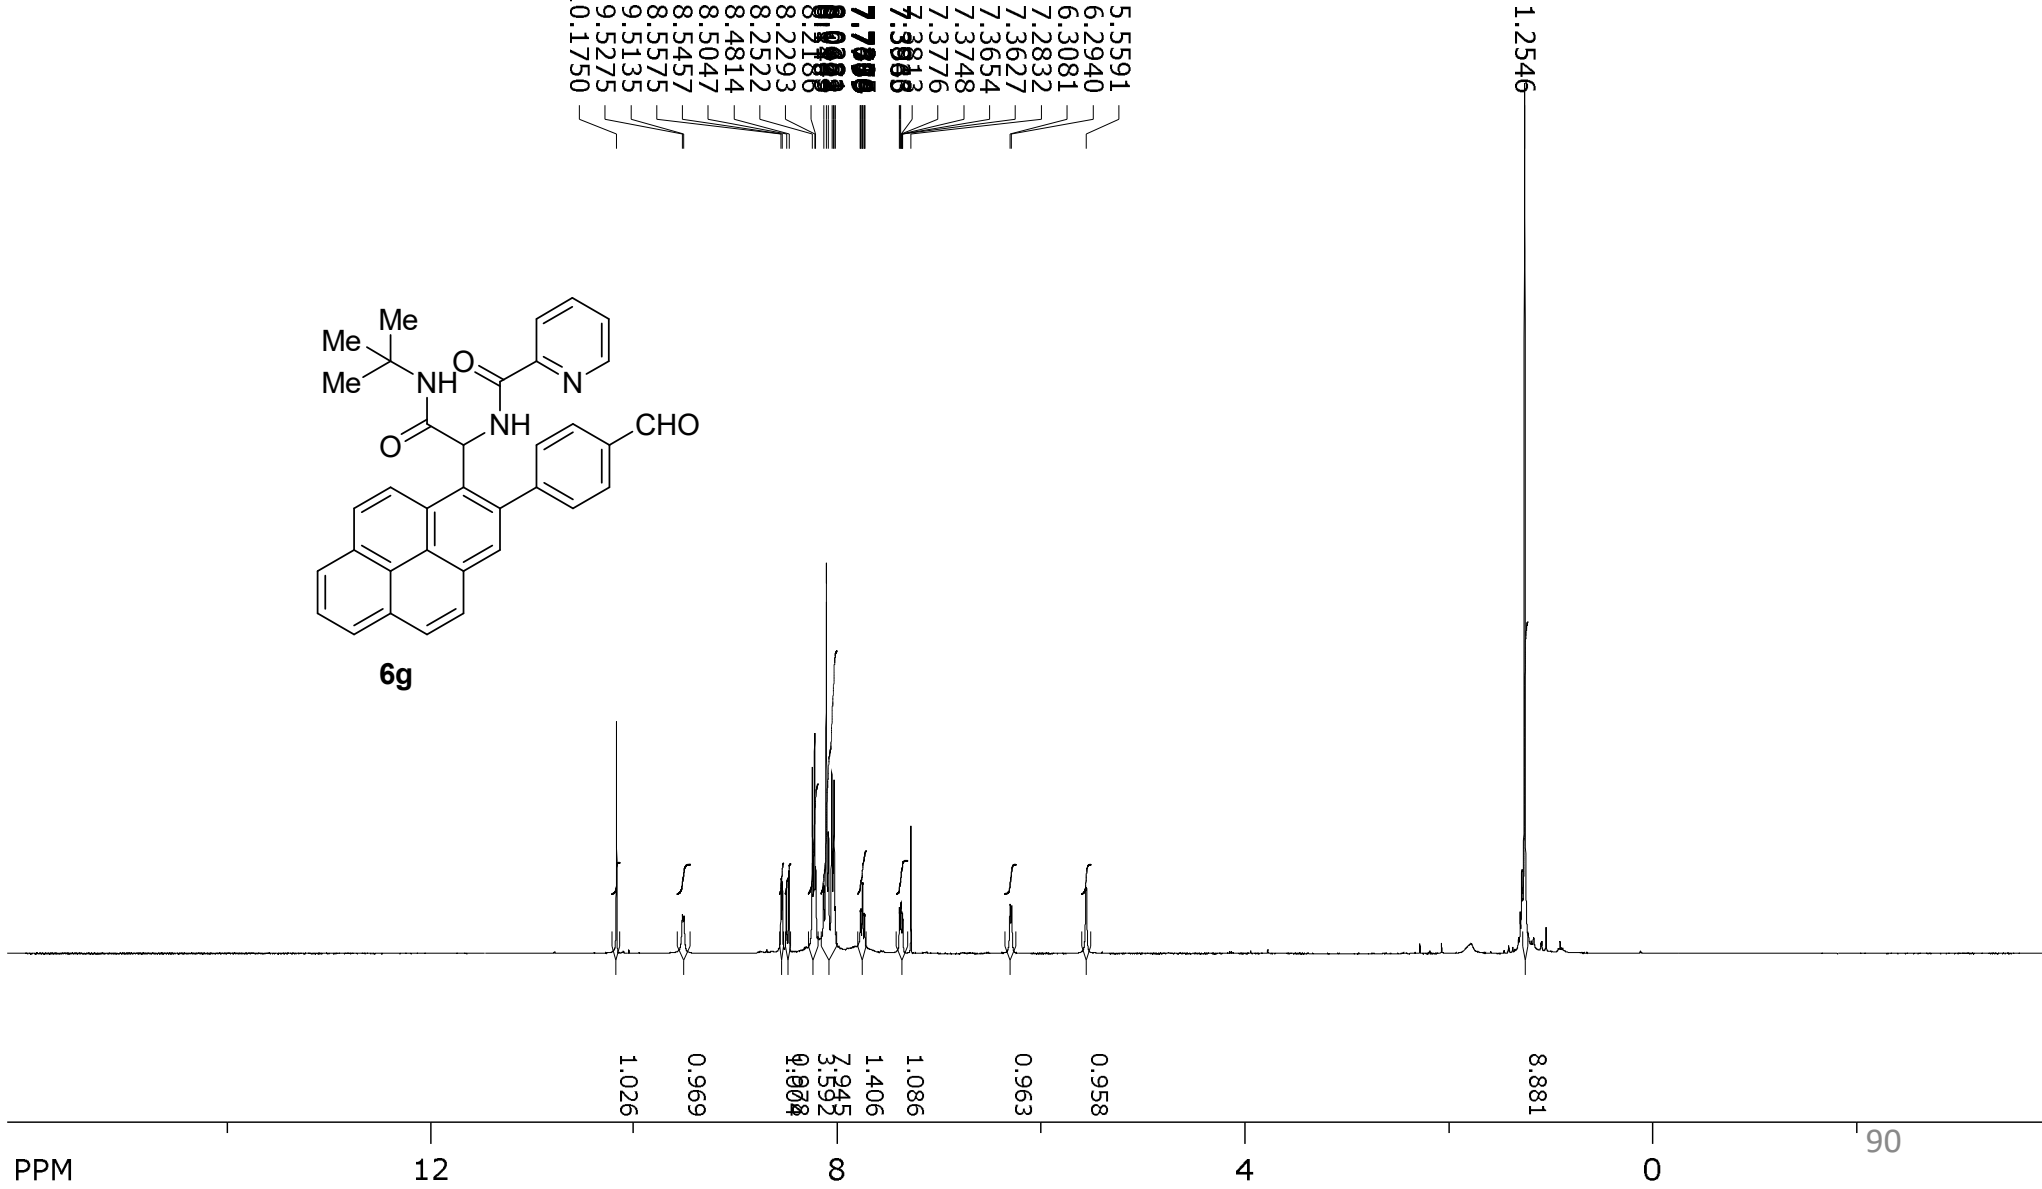

SpinWorks 4: AD 1946  
PROTON CDCl3 /opt/topspin3.5pl2/nmrdata nmrsu 13

10.1750

9.5135  
9.5275

8.4814  
8.5047  
8.5457  
8.5575

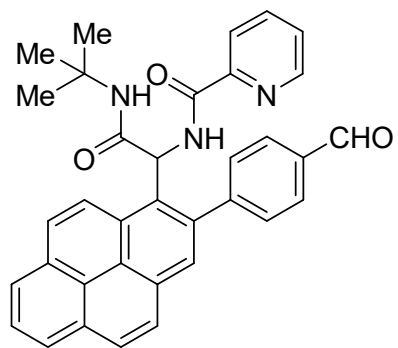

6g

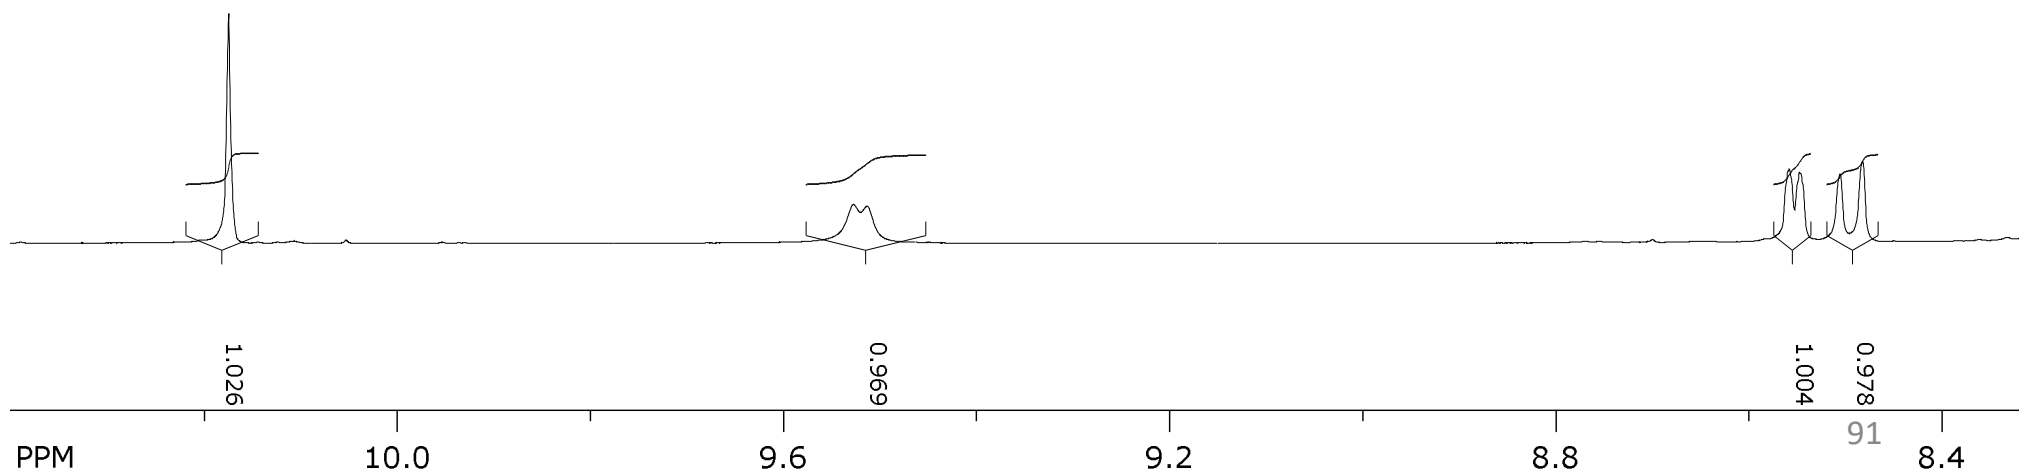

SpinWorks 4: AD 1946  
PROTON CDCl3 /opt/topspin3.5pl2/nmrdata nmrsu 13

8.2522 —  
8.2293 —  
8.2186 —  
8.1403 —  
8.1143 —  
8.0928 —  
8.0602 —  
8.0472 —  
8.0381 —  
8.0281 —

7.7374 —  
7.7395 —  
7.7414 —  
7.7568 —  
7.7588 —  
7.7606 —  
7.7759 —  
7.7779 —  
7.7799 —

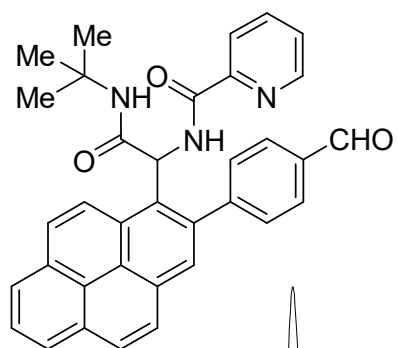

6g

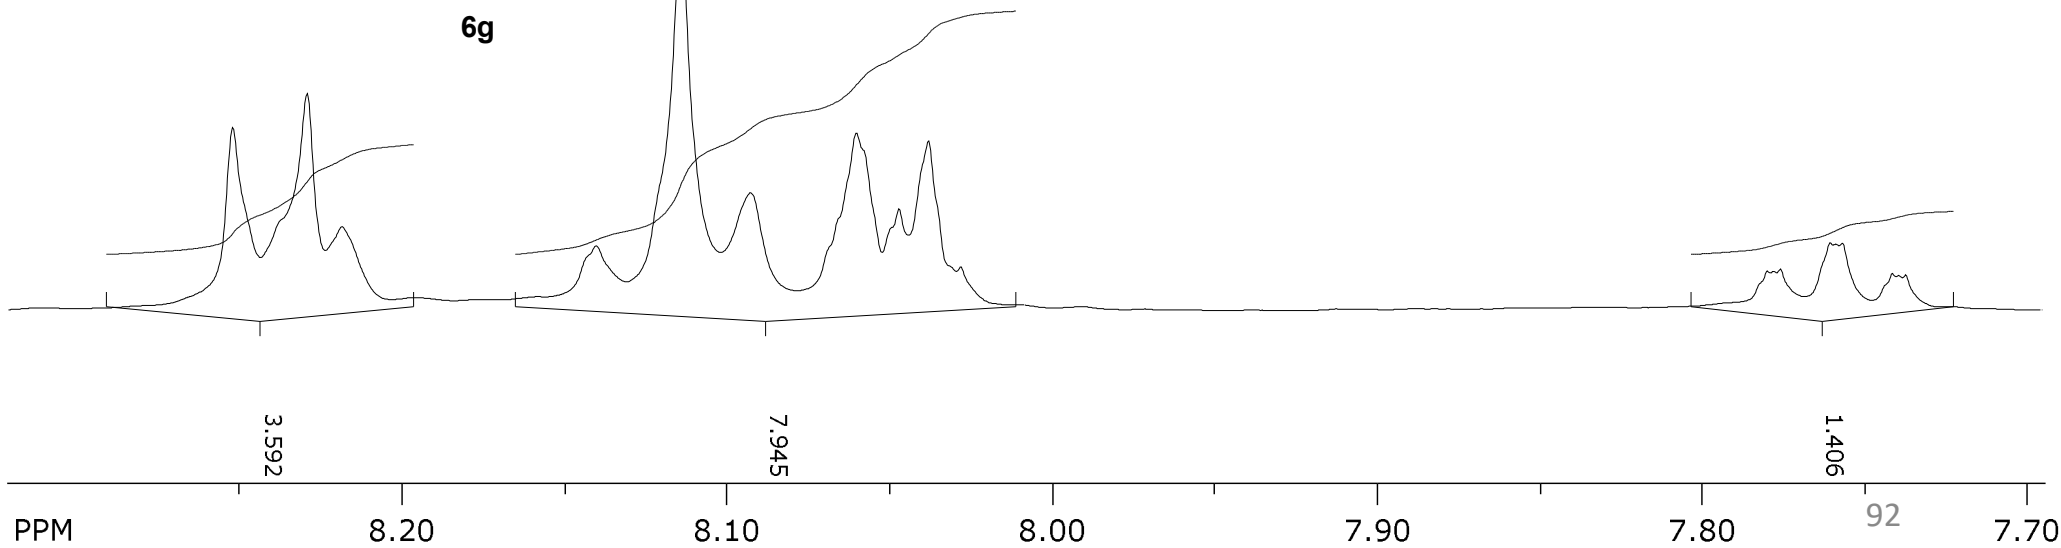

SpinWorks 4: AD 1946  
PROTON CDCl3 /opt/topspin3.5pl2/nmrdata nmrsu 13

7.2832  
7.3627  
7.3654  
7.3748  
7.3776  
7.3813  
7.3843  
7.3936  
7.3963

6.2940  
6.3081

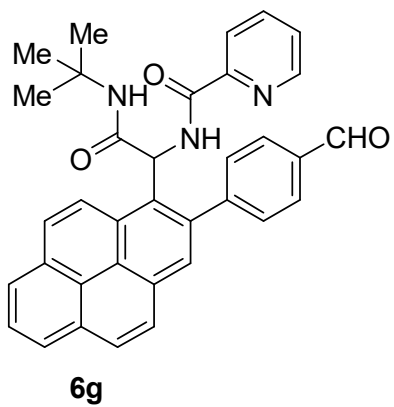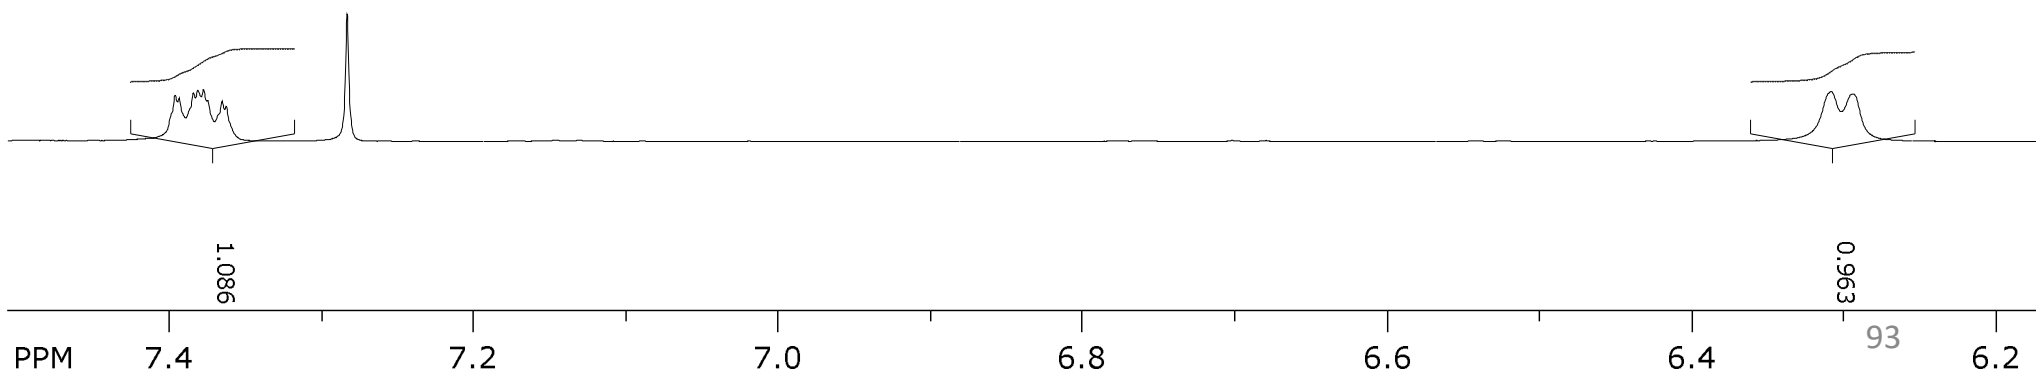

SpinWorks 4: AD 1946  
PROTON CDCl3 /opt/topspin3.5pl2/nmrdata nmrsu 13

5.5591

1.2546

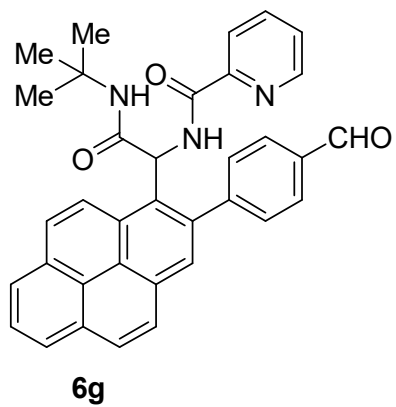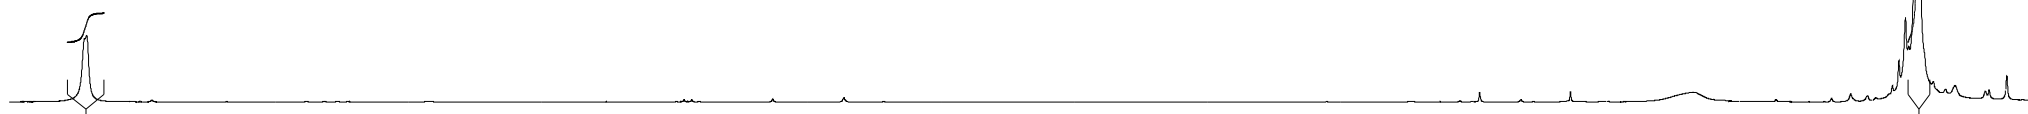

0.958

8.881

PPM

5.2

4.8

4.4

4.0

3.6

3.2

2.8

2.4

2.0

1.6

94

1.2

SpinWorks 4: AD-1946  
C13CPD256 CDCl3 /opt/topspin3.5pl2/nmrdata nmrsu 19

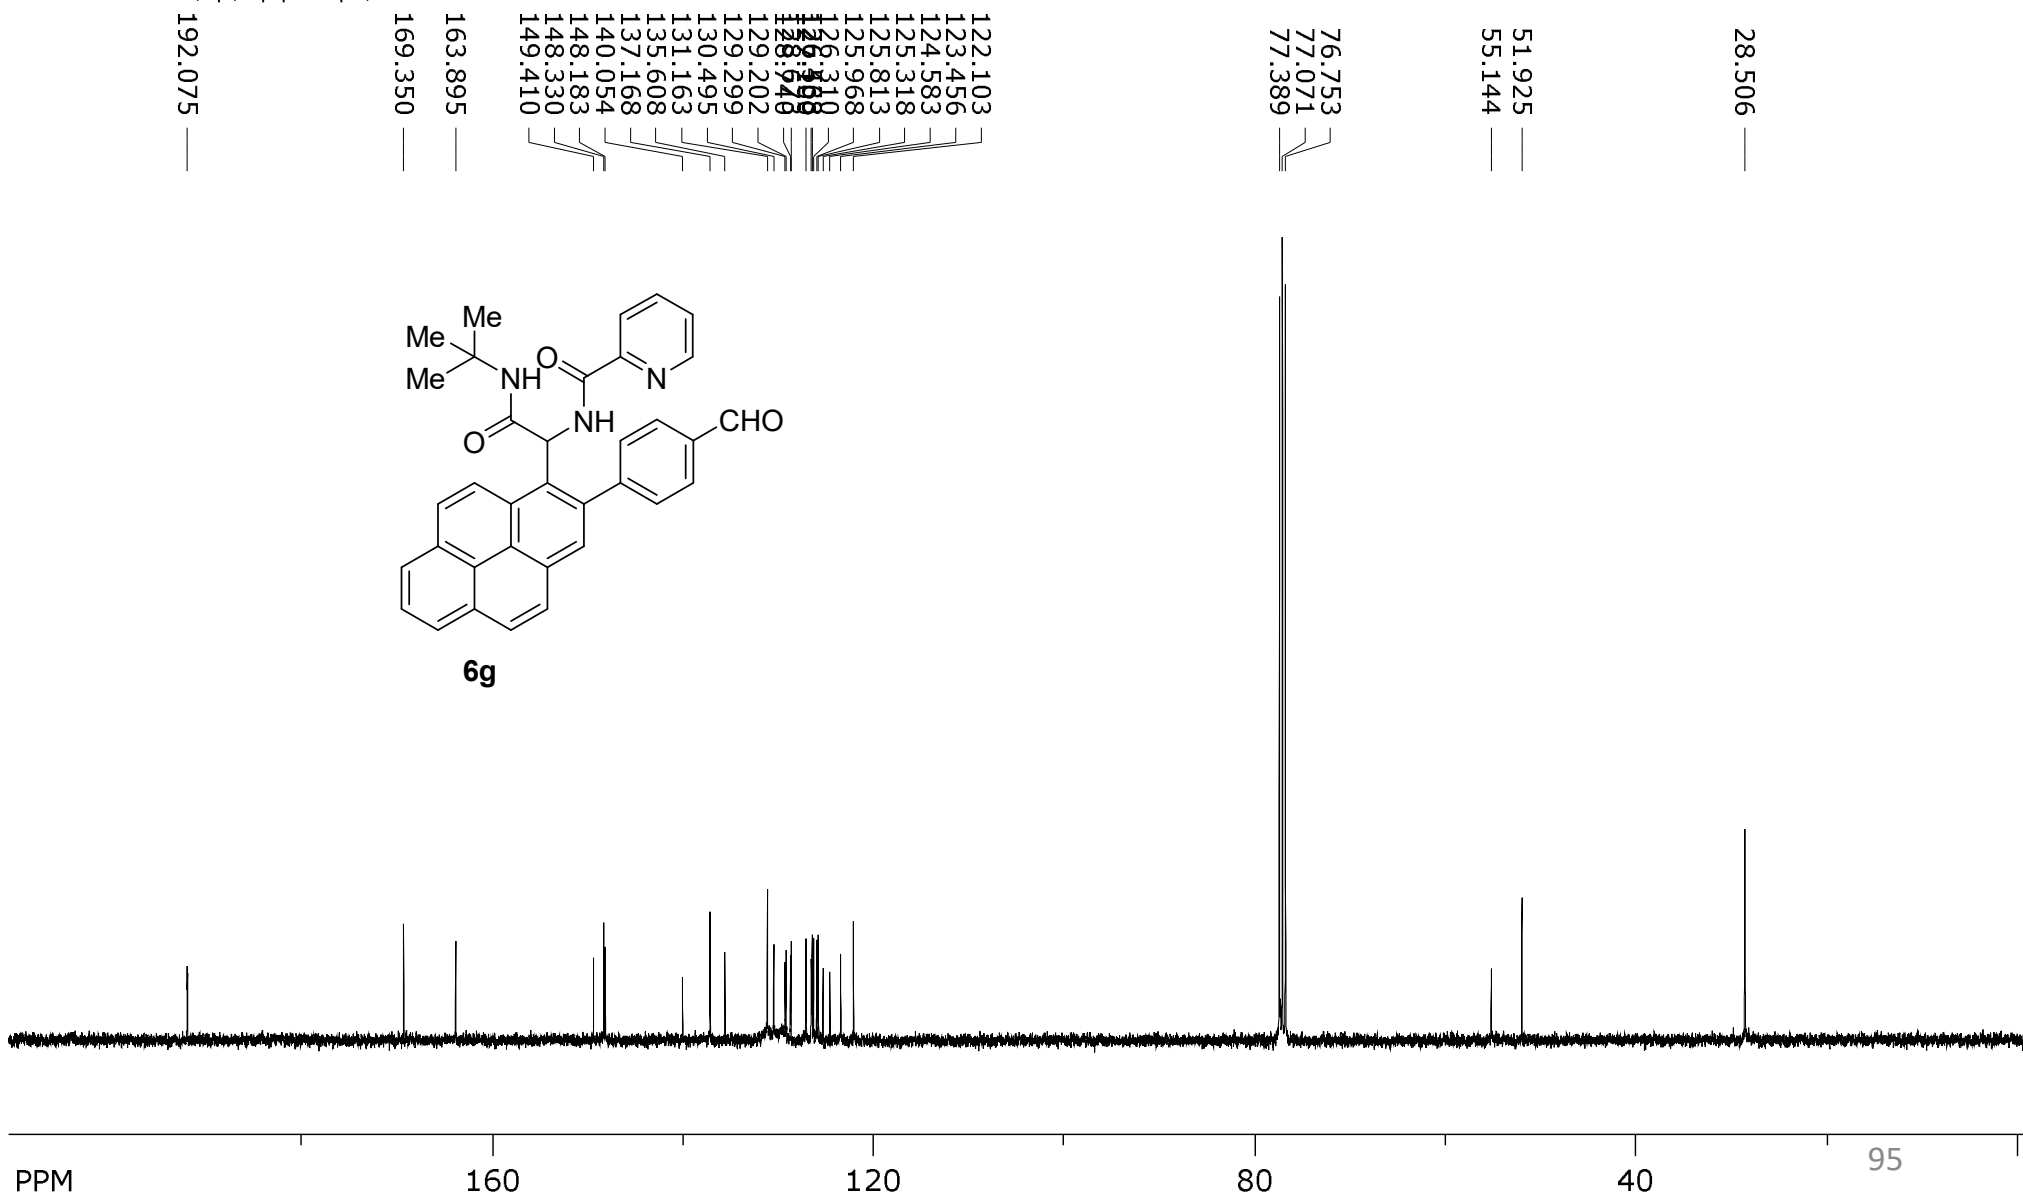

SpinWorks 4: AD-1946  
C13CPD256 CDCl3 /opt/topspin3.5pl2/nmrdata nmrsu 19

149.410 —  
148.183 —  
148.330 —  
140.054 —  
137.168 —  
135.608 —  
131.163 —  
130.495 —  
129.299 —  
128.673 —  
128.740 —  
129.202 —  
127.100 —  
126.538 —  
126.463 —  
126.310 —  
125.968 —  
125.813 —  
125.318 —  
124.583 —  
123.456 —  
122.103 —



6g

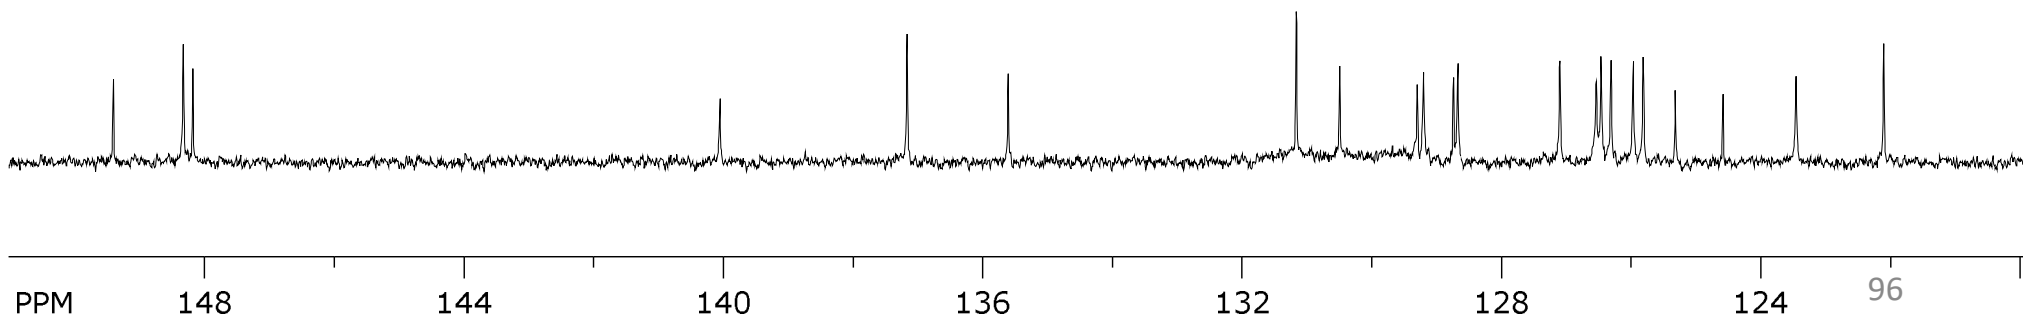



SpinWorks 4: AD 1852 RE  
PROTON CDCl3 /opt/topspin3.5pl2/nmrdata nmrsu 28

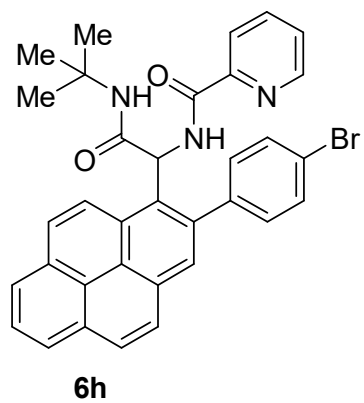

5.4892  
6.33228  
6.33375  
7.28229  
7.3662  
7.3788  
7.3847  
7.3970  
7.7199  
7.7391  
7.7394  
7.7397  
8.0000  
8.0000  
8.2046  
8.2142  
8.2267  
8.4901  
8.5135  
8.5739  
8.5856  
9.5582  
9.5717

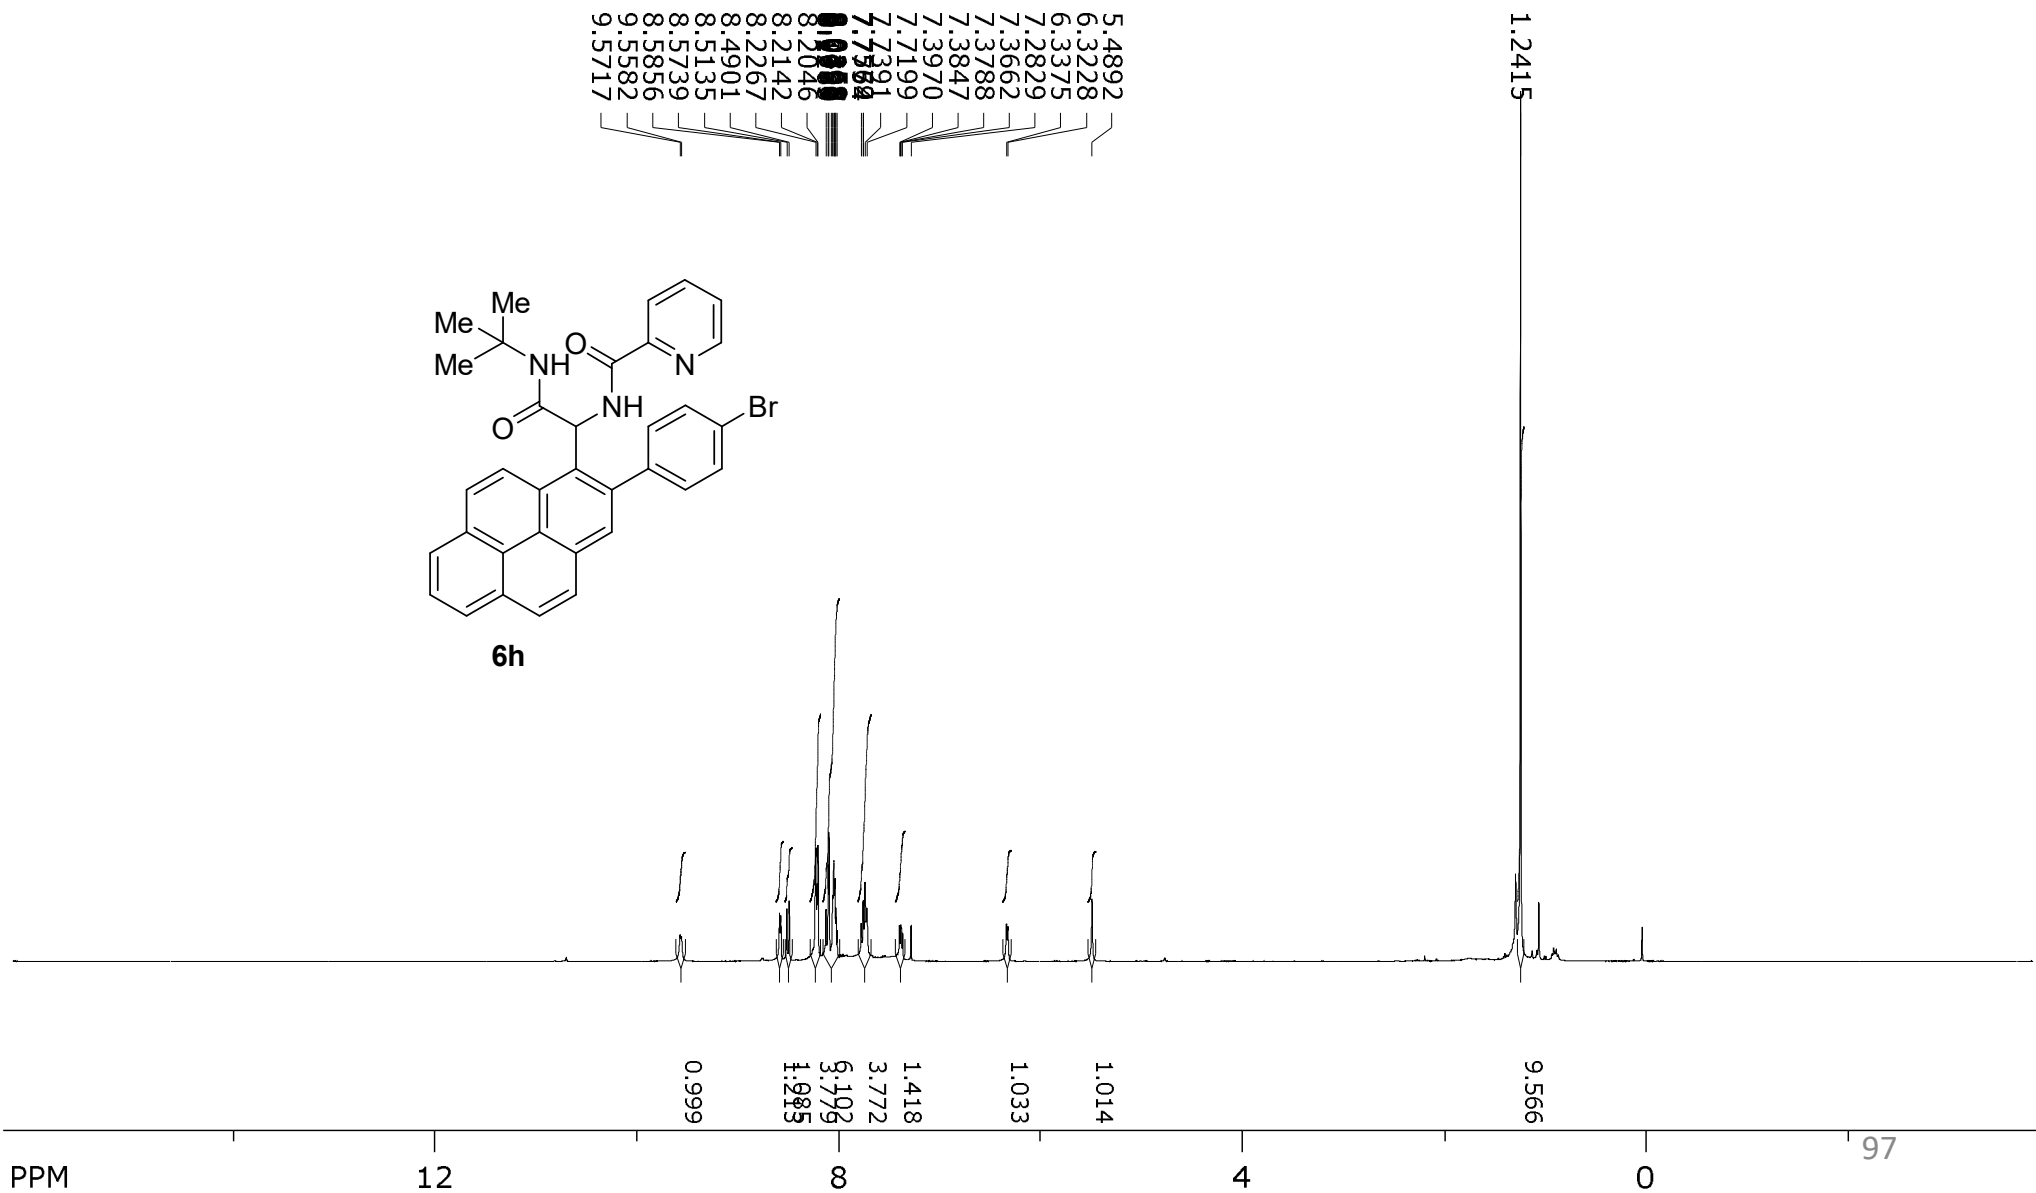

SpinWorks 4: AD 1852 RE  
PROTON CDCl3 /opt/topspin3.5pl2/nmrdata nmrsu 28

9.5582  
9.5717

8.5739  
8.5856  
8.4901  
8.5135

8.0159  
8.0268  
8.0355  
8.0407  
8.0491  
8.0598  
8.0756  
8.0958  
8.1039  
8.1263  
8.2046  
8.2142  
8.2267

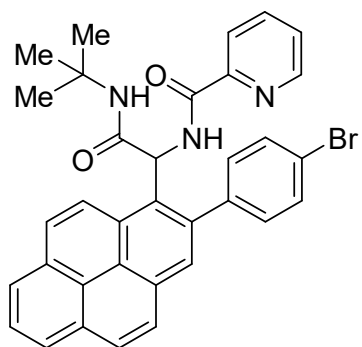

6h

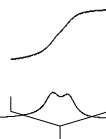

0.999

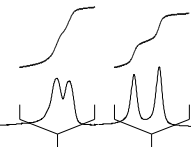

1.213

1.085

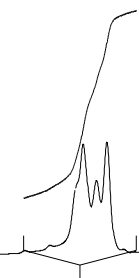

3.779

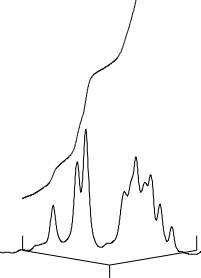

6.102

PPM

9.6

9.4

9.2

9.0

8.8

8.6

8.4

8.2

8.0

SpinWorks 4: AD 1852 RE  
PROTON CDCl3 /opt/topspin3.5pl2/nmrdata nmrsu 28

7.7199  
7.7391  
7.7562  
7.7579  
7.7754

7.2829  
7.3662  
7.3788  
7.3847  
7.3970

6.3228  
6.3375

5.4892

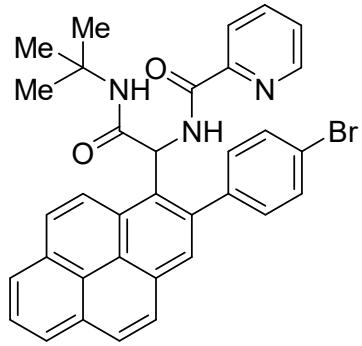

6h

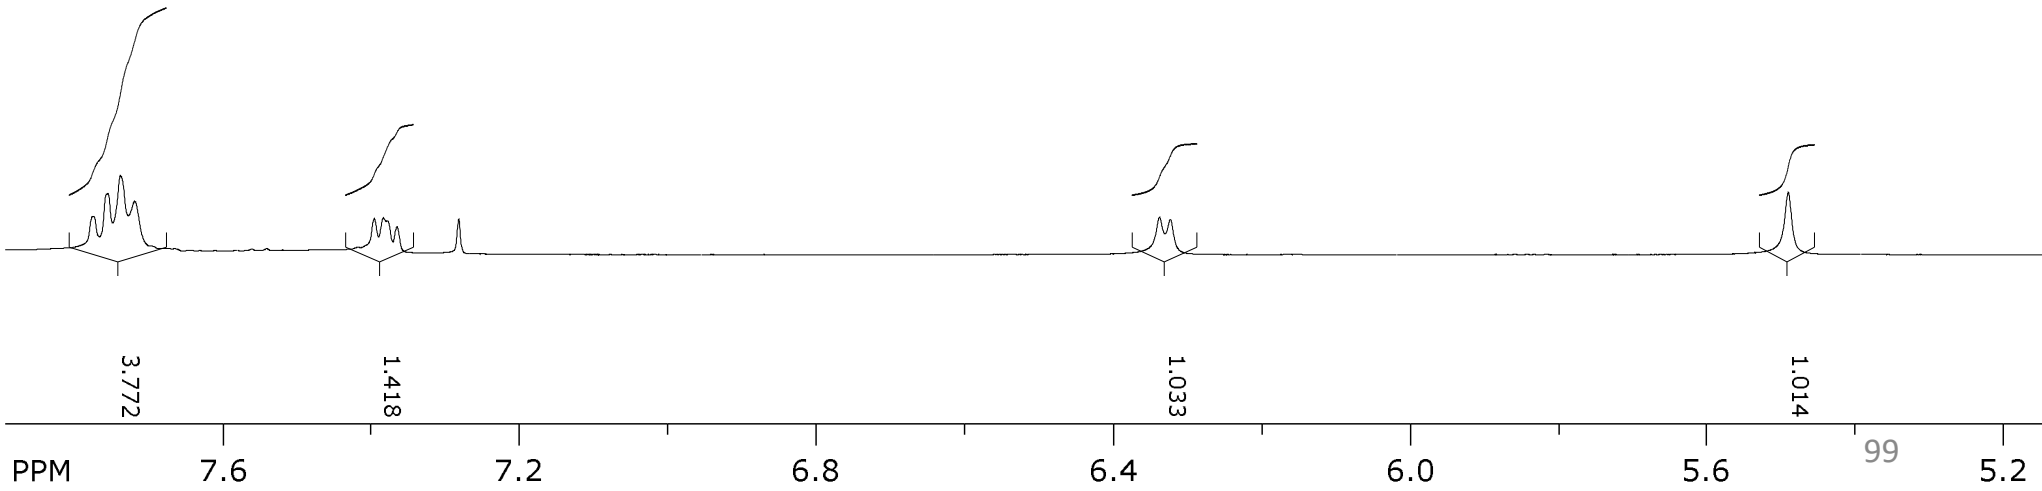

SpinWorks 4: AD-1852  
C13CPD256 CDCl3 /opt/topspin3.5pl2/nmrdata nmrsu 43

122.205  
122.293  
123.611  
124.596  
125.164  
125.707  
125.841  
126.088  
126.109  
126.110  
130.458  
131.109  
131.118  
131.661  
131.722  
137.349  
140.067  
140.688  
148.159  
149.337  
163.678  
169.383



6h

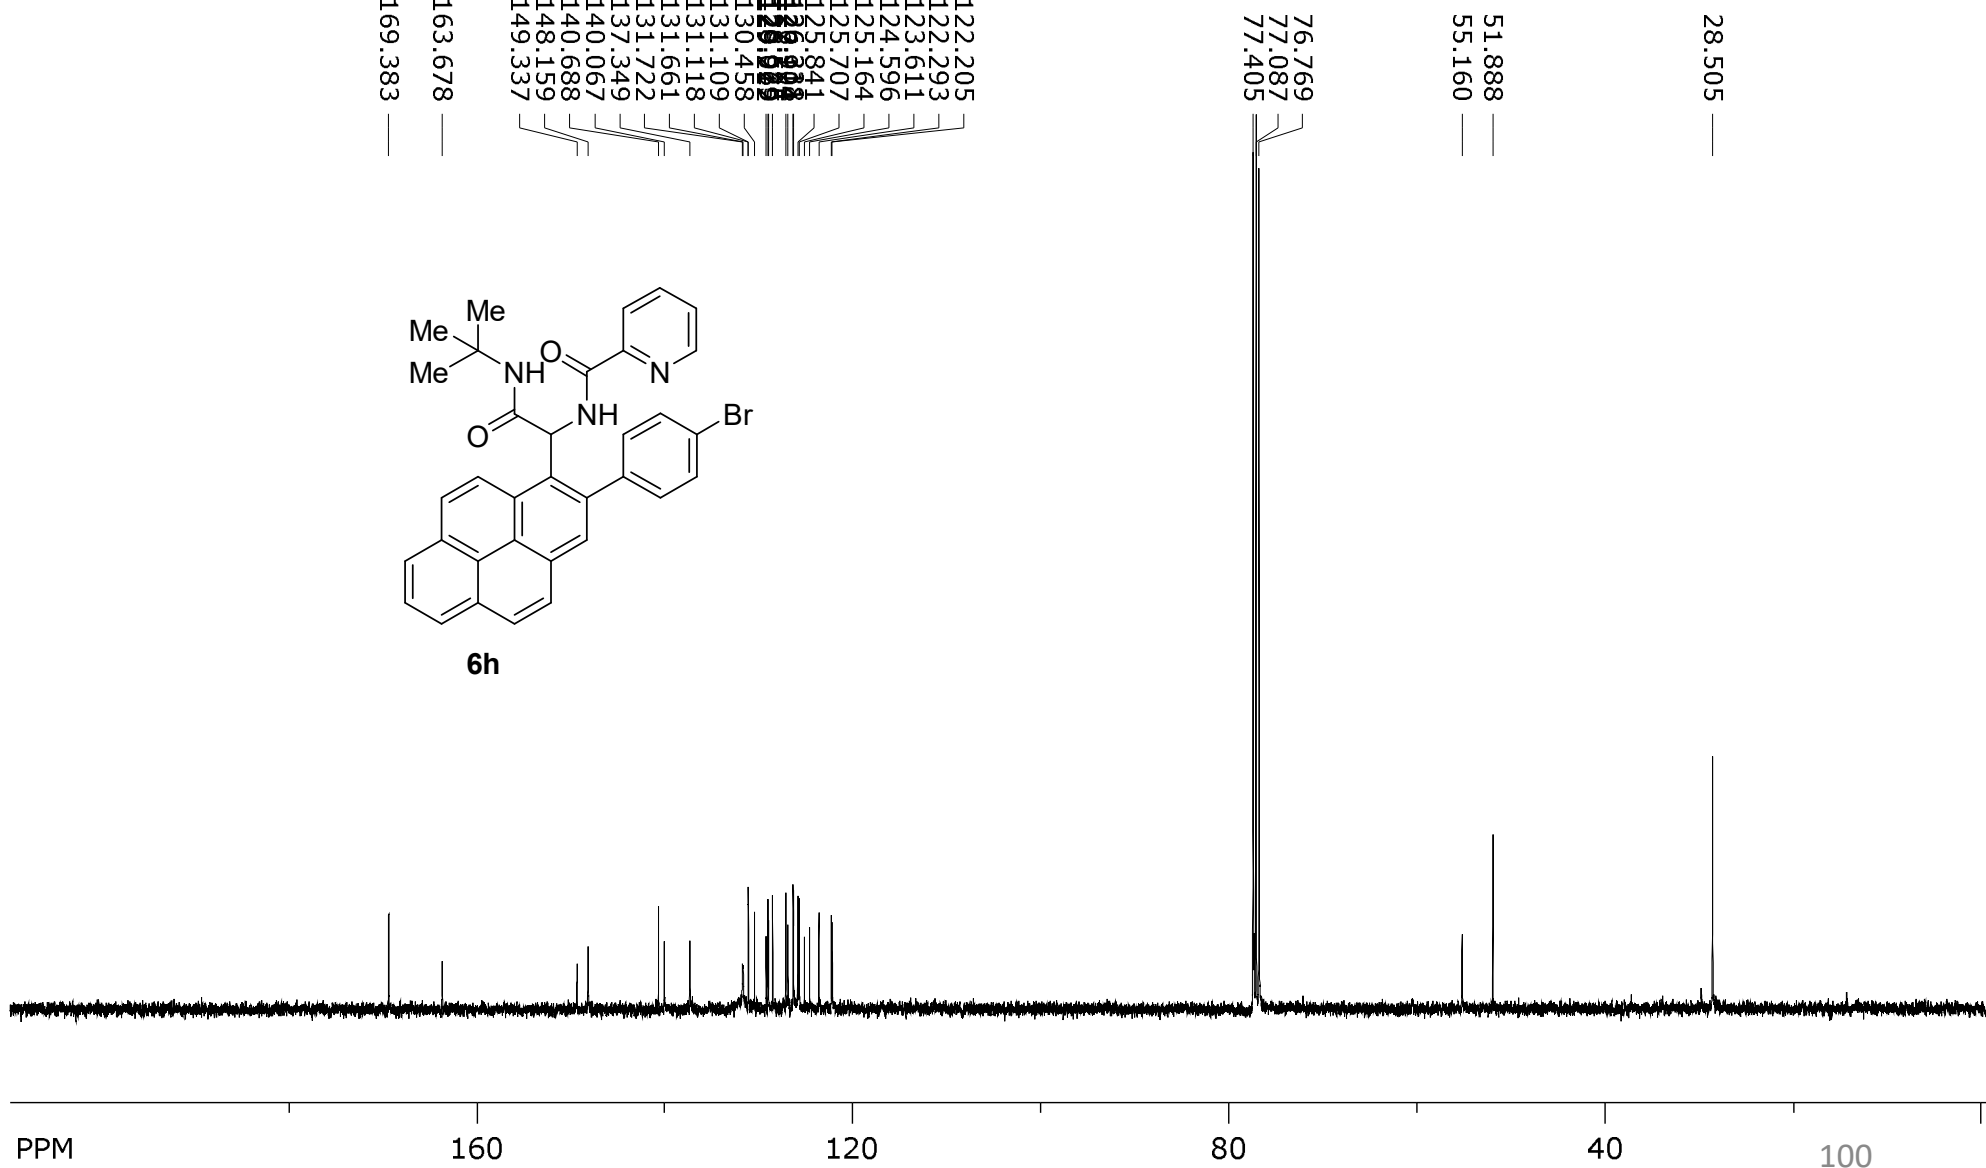

SpinWorks 4: AD-1852  
C13CPD256 CDCl3 /opt/topspin3.5pl2/nmrdata nmrsu 43

|         |         |         |         |         |         |         |         |         |         |         |         |         |         |         |         |         |         |         |         |         |         |         |         |         |   |
|---------|---------|---------|---------|---------|---------|---------|---------|---------|---------|---------|---------|---------|---------|---------|---------|---------|---------|---------|---------|---------|---------|---------|---------|---------|---|
| 149.337 | 148.159 | 140.667 | 140.688 | 137.349 | 131.722 | 131.661 | 131.118 | 131.109 | 130.458 | 129.212 | 129.029 | 128.965 | 128.525 | 127.124 | 126.904 | 126.338 | 126.311 | 125.841 | 125.707 | 125.164 | 124.596 | 123.611 | 122.293 | 122.205 |   |
| —       | —       | —       | —       | —       | —       | —       | —       | —       | —       | —       | —       | —       | —       | —       | —       | —       | —       | —       | —       | —       | —       | —       | —       | —       | — |



6h

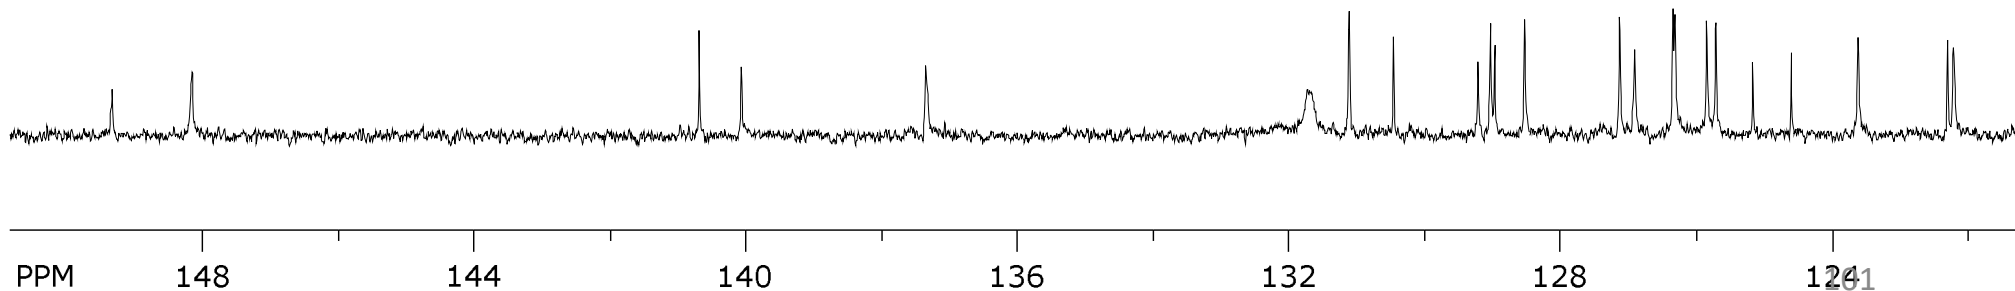



SpinWorks 4: AD 1899  
PROTON CDCl3 /opt/topspin3.5pl2/nmrdata nmrsu 7

8.5464  
8.5698  
8.5801  
8.5921

8.1947  
8.2050  
8.2168  
8.2234  
8.1581  
8.1210  
8.0987  
8.0718  
8.0578  
8.0431  
8.0359  
8.0240  
8.0050

7.7263  
7.7300  
7.7456  
7.7491  
7.7648  
7.7684

7.5324  
7.5505  
7.5692  
7.6017  
7.6176

7.2833  
7.3552  
7.3674  
7.3700  
7.3739  
7.3860

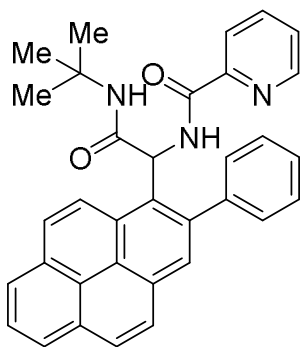

6i

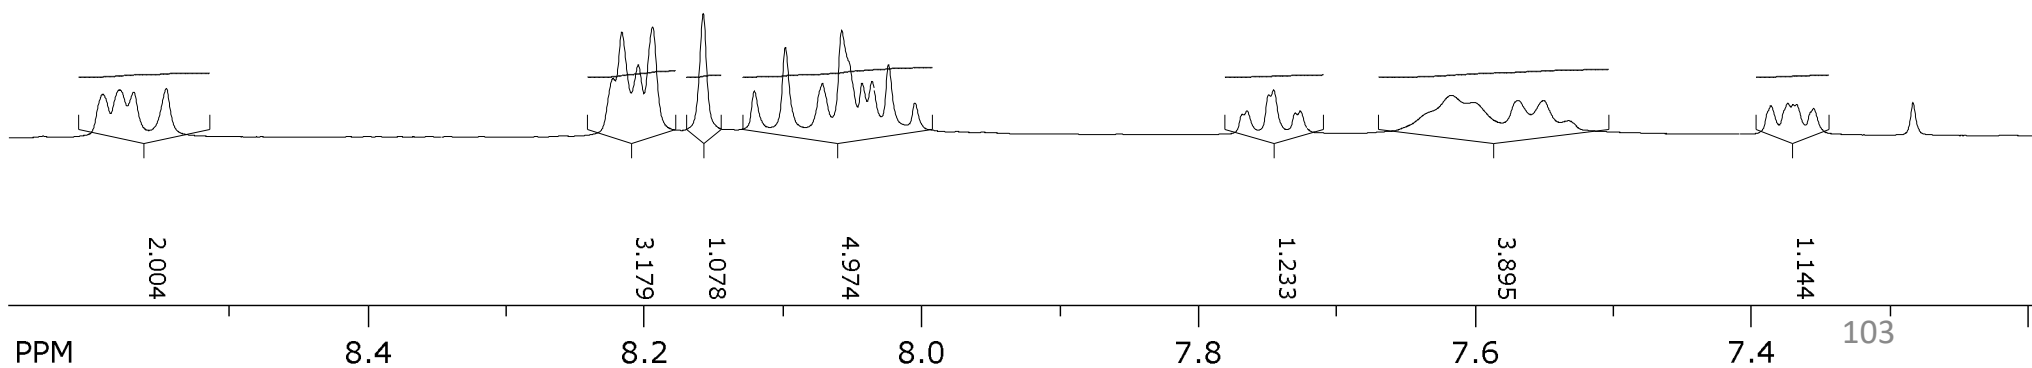

SpinWorks 4: AD 1899  
C13CPD256 CDCl3 /opt/topspin3.5pl2/nmrdata nmrsu 7

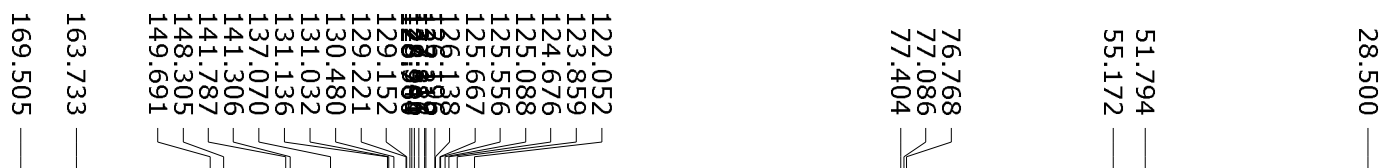

6i

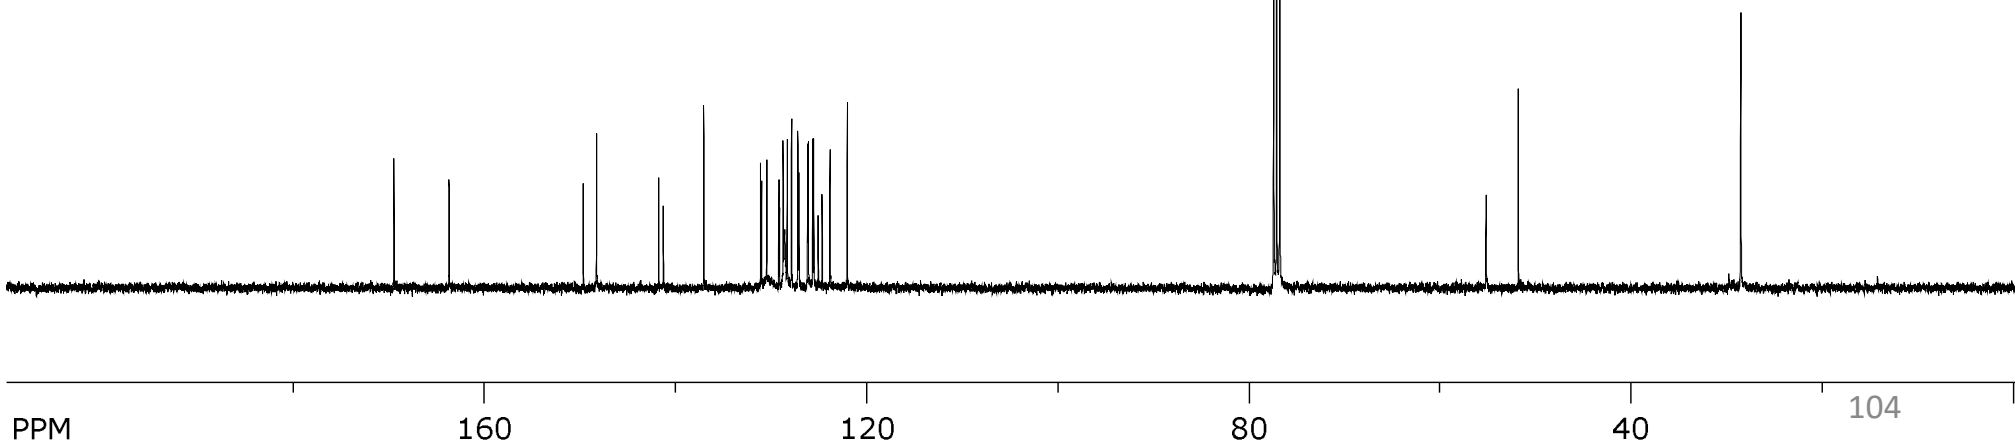





SpinWorks 4: AD-1814  
PROTON CDCl3 /opt/topspin3.5pl2/nmrdata nmrsu 14

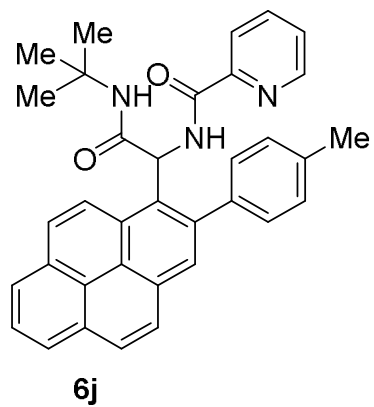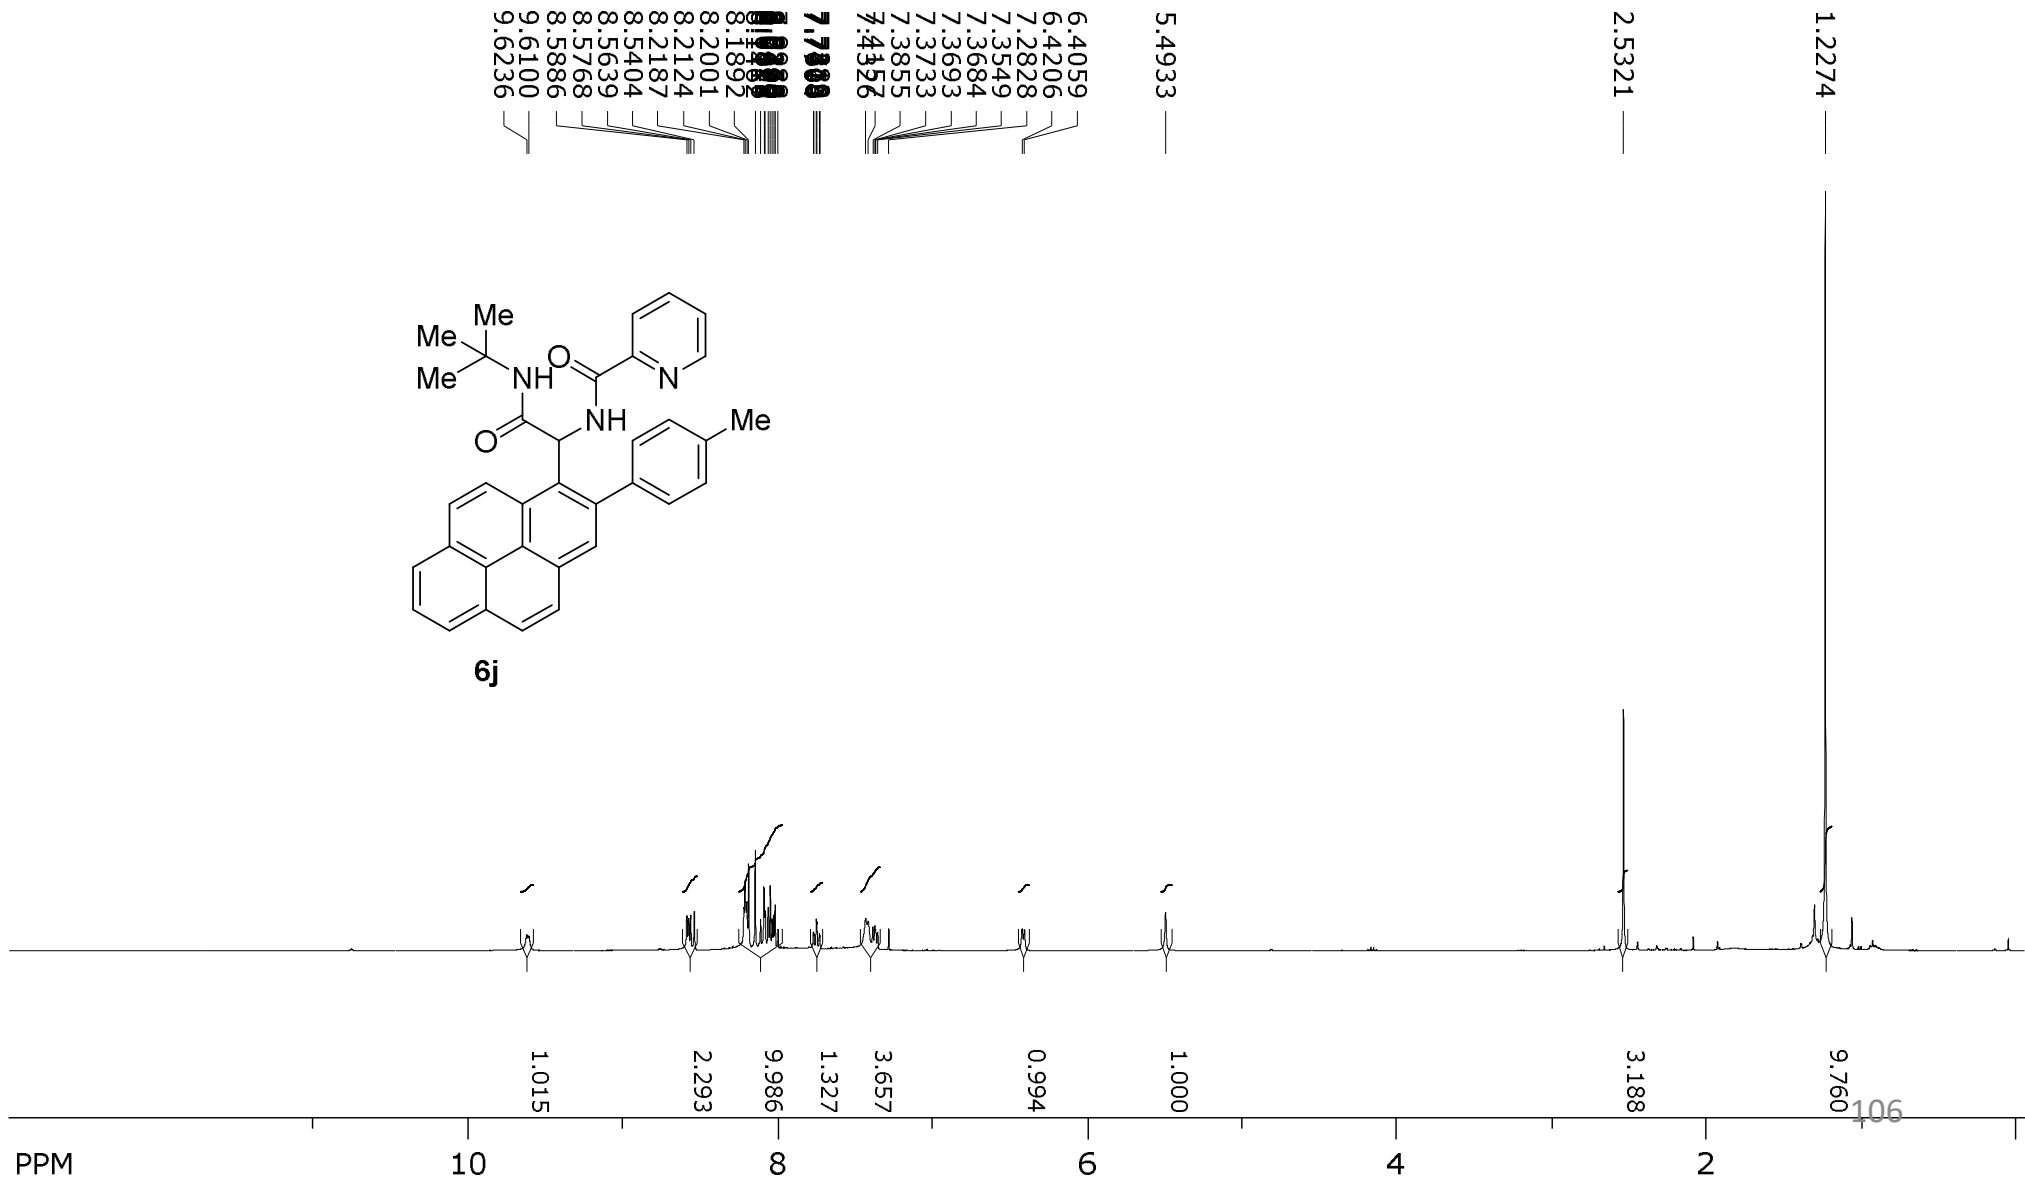

SpinWorks 4: AD-1814  
PROTON CDCl3 /opt/topspin3.5pl2/nmrdata nmrsu 14

8.5404  
8.5639  
8.5768  
8.5886

7.9988  
8.0178  
8.0268  
8.0368  
8.0492  
8.0622  
8.0819  
8.0892  
8.1116  
8.1462  
8.1892  
8.2001  
8.2124  
8.2187

7.7283  
7.7319  
7.7476  
7.7513  
7.7668  
7.7704

7.2828  
7.3549  
7.3684  
7.3693  
7.3733  
7.3855  
7.4157  
7.4326

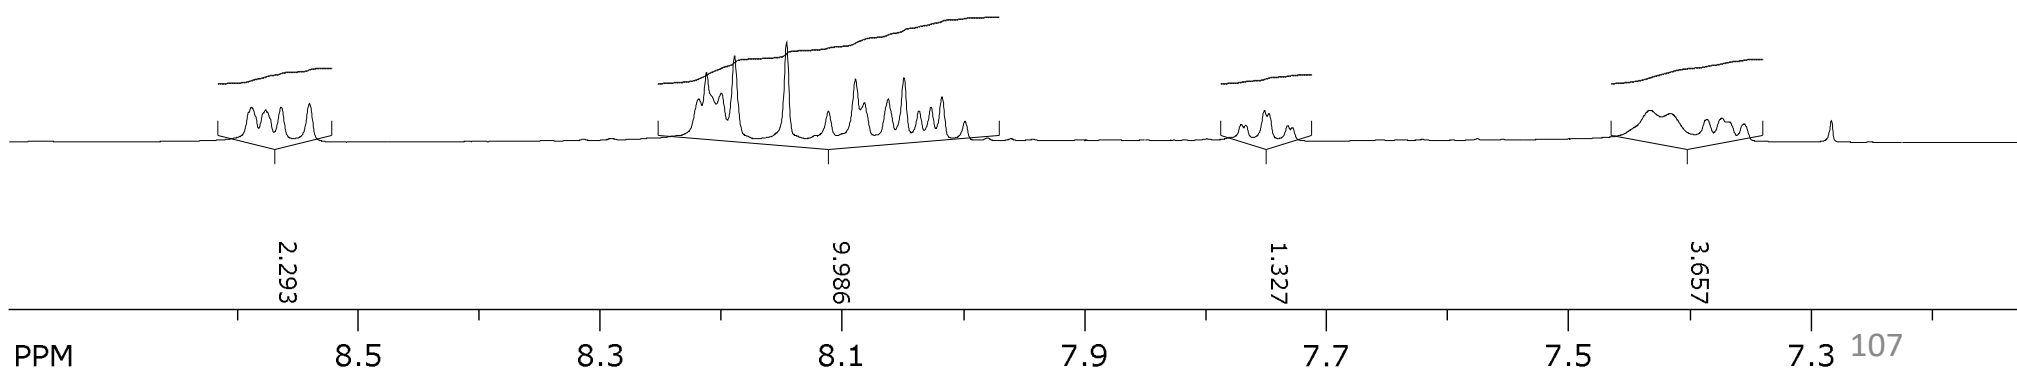

SpinWorks 4: AD 1814  
C13CPD CDCl3 /opt/topspin3.5pl2/nmrdata nmrsu 47

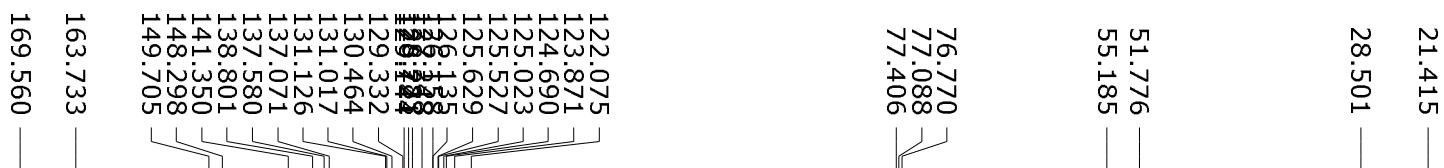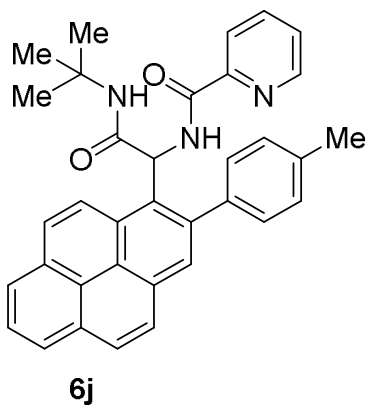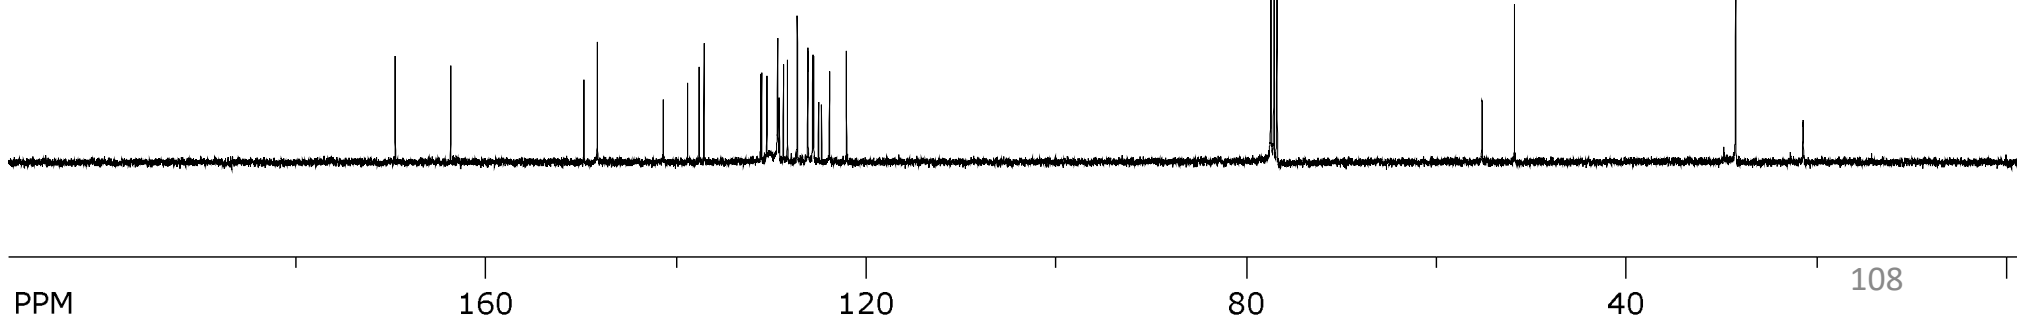

SpinWorks 4: AD 1814  
C13CPD CDCl3 /opt/topspin3.5pl2/nmrdata nmrsu 47

149.705 —  
148.298 —  
141.350 —  
138.801 —  
137.071 —  
137.580 —  
130.464 —  
131.017 —  
131.126 —  
129.332 —  
128.283 —  
128.721 —  
129.144 —  
127.248 —  
126.158 —  
126.135 —  
125.629 —  
125.527 —  
125.023 —  
124.690 —  
123.871 —  
122.075 —

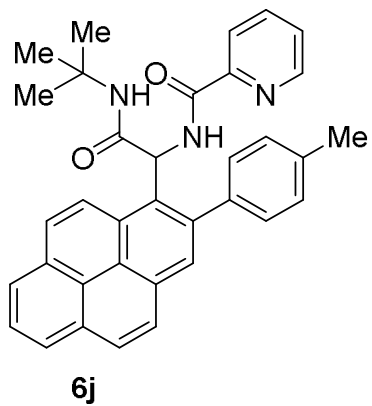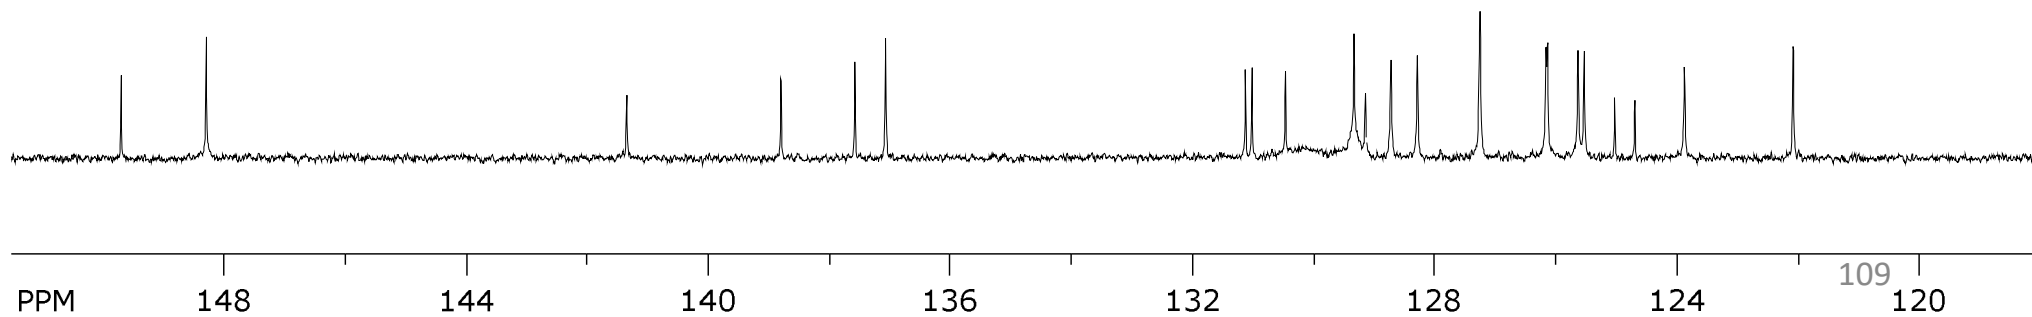

SpinWorks 4: AD-1957  
PROTON CDCl3 /opt/topspin3.5pl2/nmrdata nmrsu 6

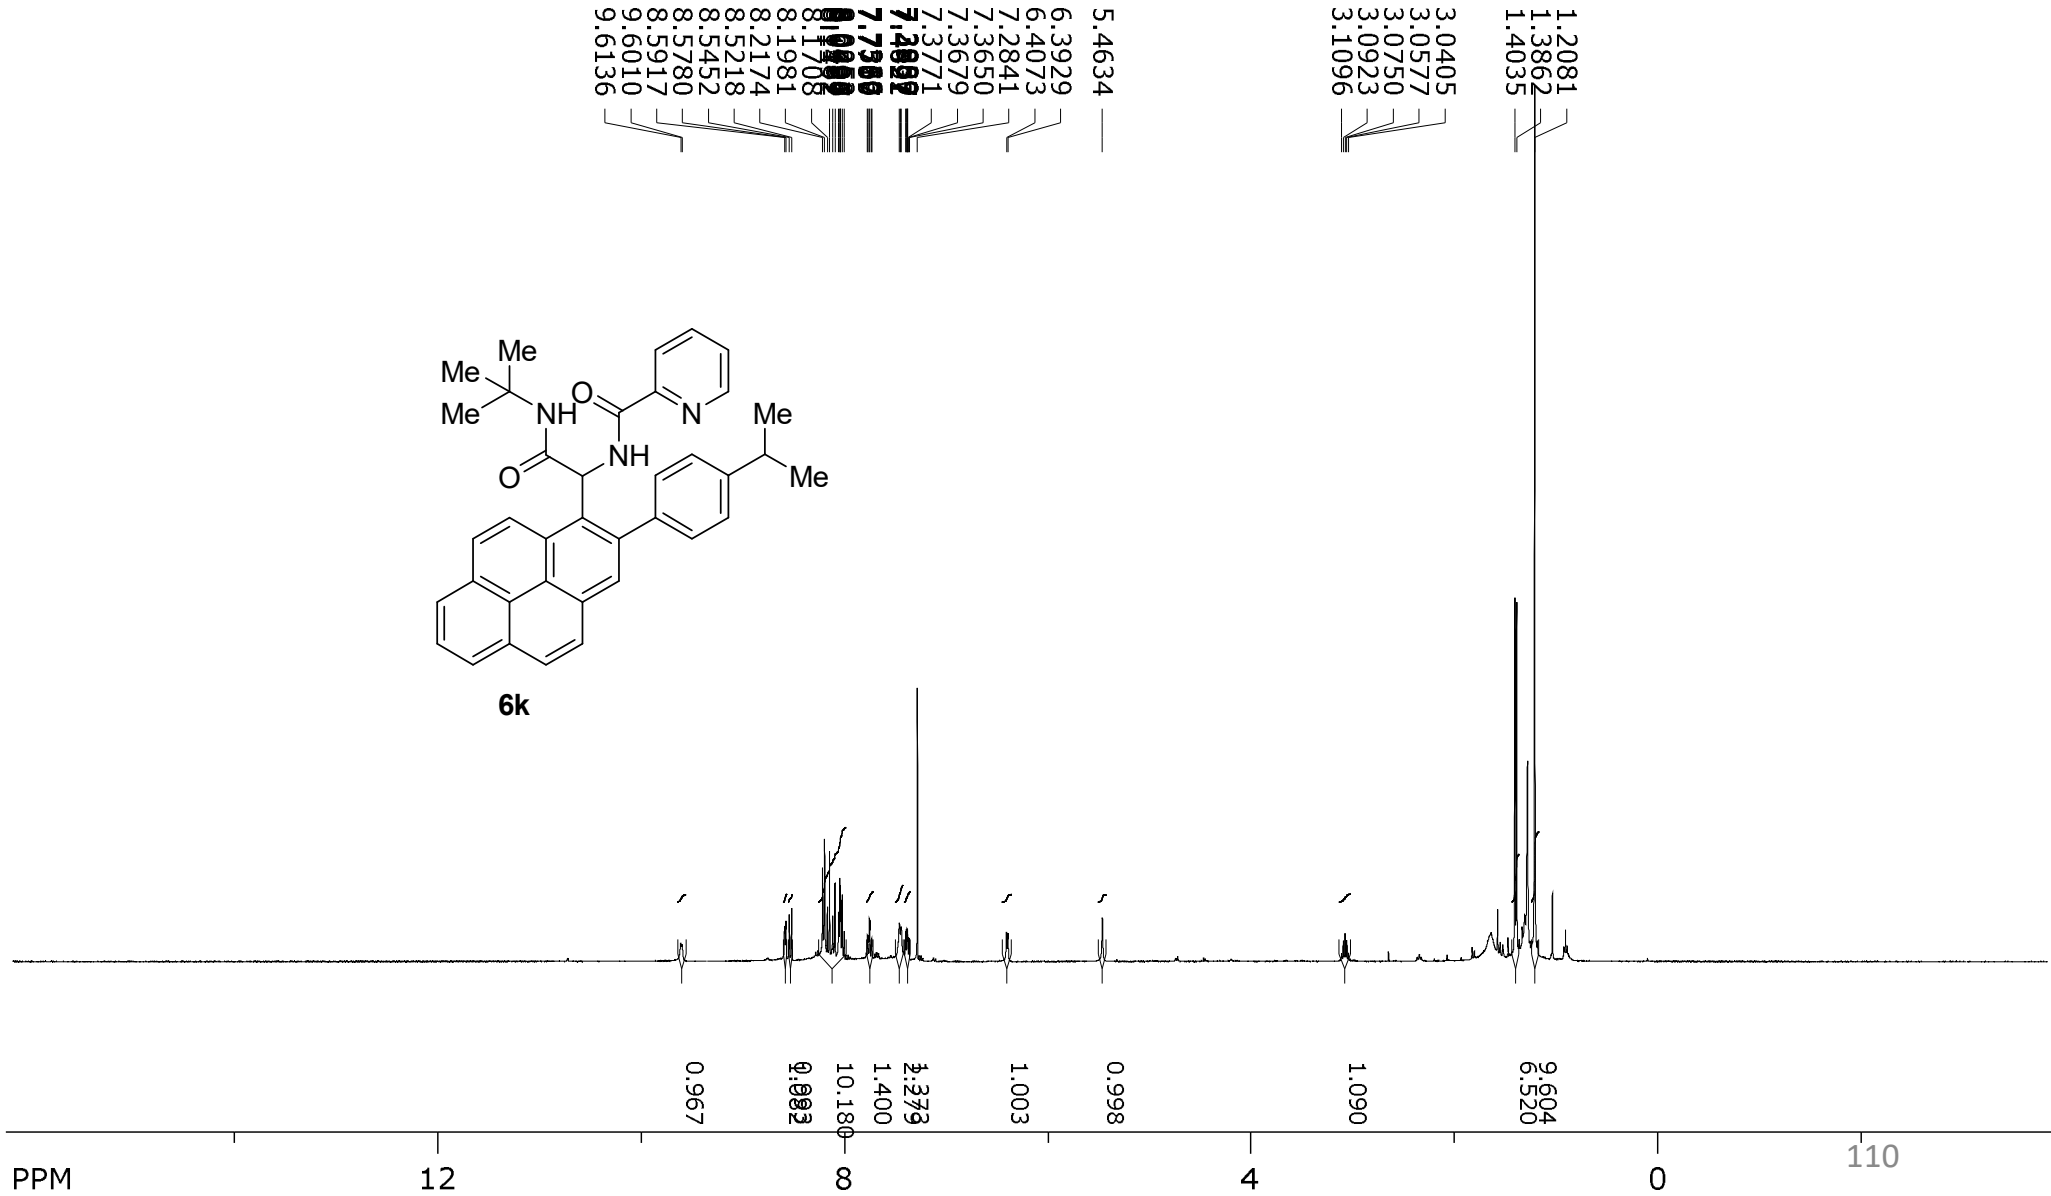

SpinWorks 4: AD-1957  
PROTON CDCl3 /opt/topspin3.5pl2/nmrdata nmrsu 6

8.5218  
8.5452  
8.5780  
8.5917

8.0053  
8.0250  
8.0406  
8.0431  
8.0497  
8.0598  
8.0959  
8.1182  
8.1492  
8.1708  
8.1981  
8.2174

7.7323  
7.7366  
7.7517  
7.7559  
7.7709  
7.7750

7.2841  
7.3650  
7.3679  
7.3771  
7.3800  
7.3839  
7.3867  
7.3959  
7.3987  
7.4437  
7.4522  
7.4621

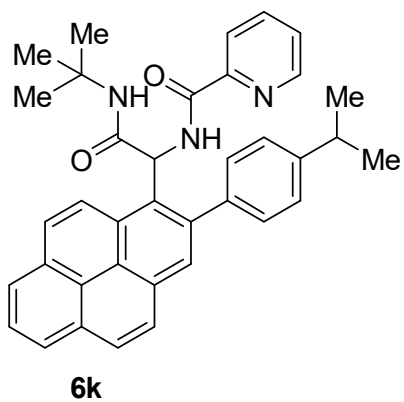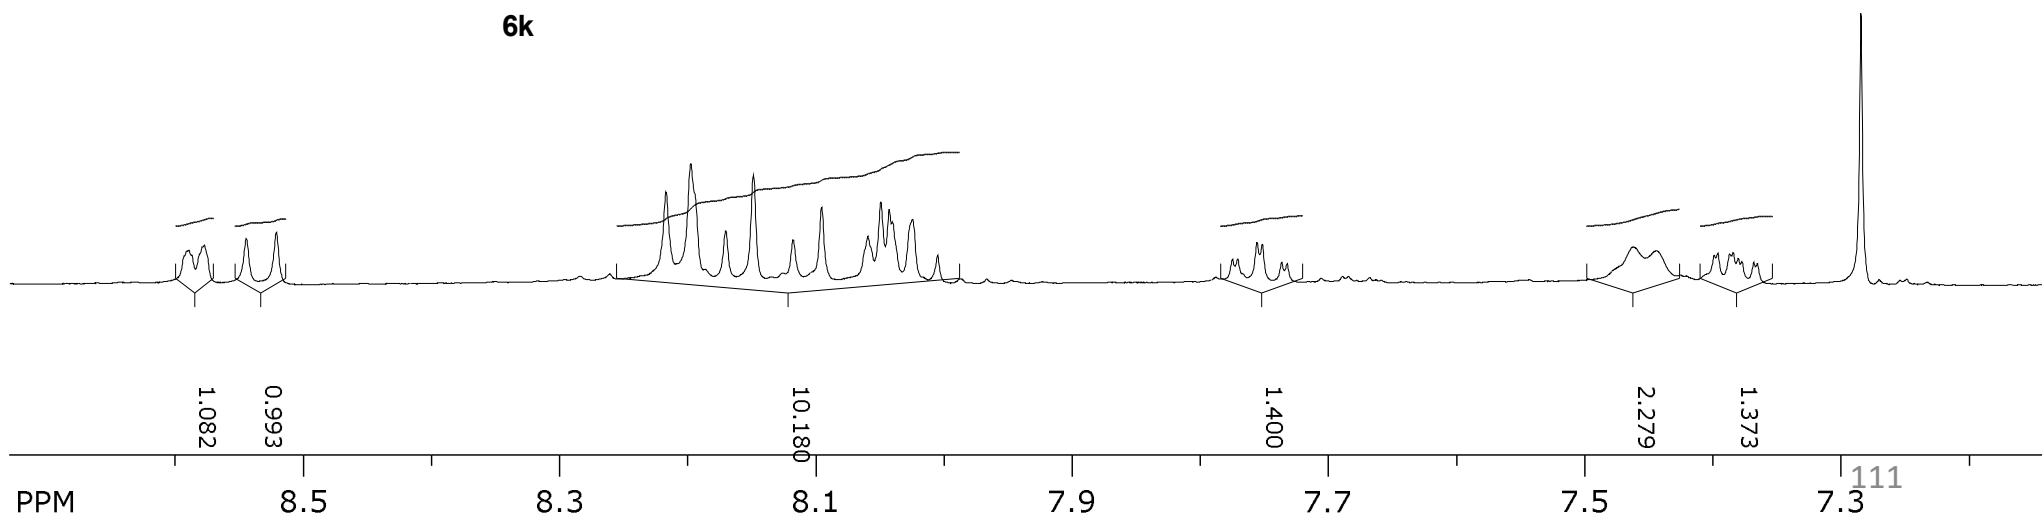

SpinWorks 4: AD-1957  
PROTON CDCl3 /opt/topspin3.5pl2/nmrdata nmrsu 6

6.3929  
6.4073

5.4634

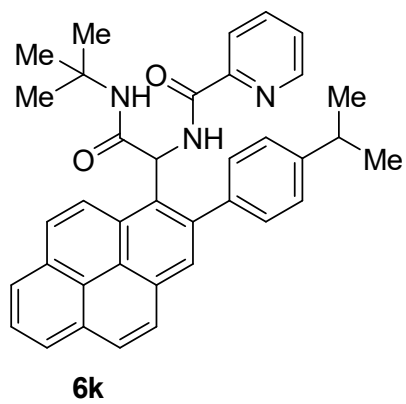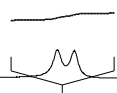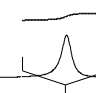

1.003

0.998

112

PPM 6.6 6.4 6.2 6.0 5.8 5.6 5.4 5.2



SpinWorks 4: AD-1957  
PROTON CDCl3 /opt/topspin3.5pl2/nmrdata nmrsu 6

3.0577  
3.0750  
3.0922

1.3861  
1.4034

1.2081

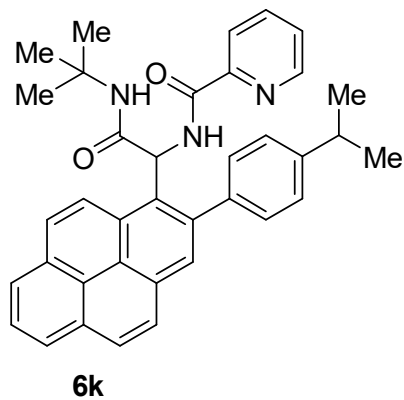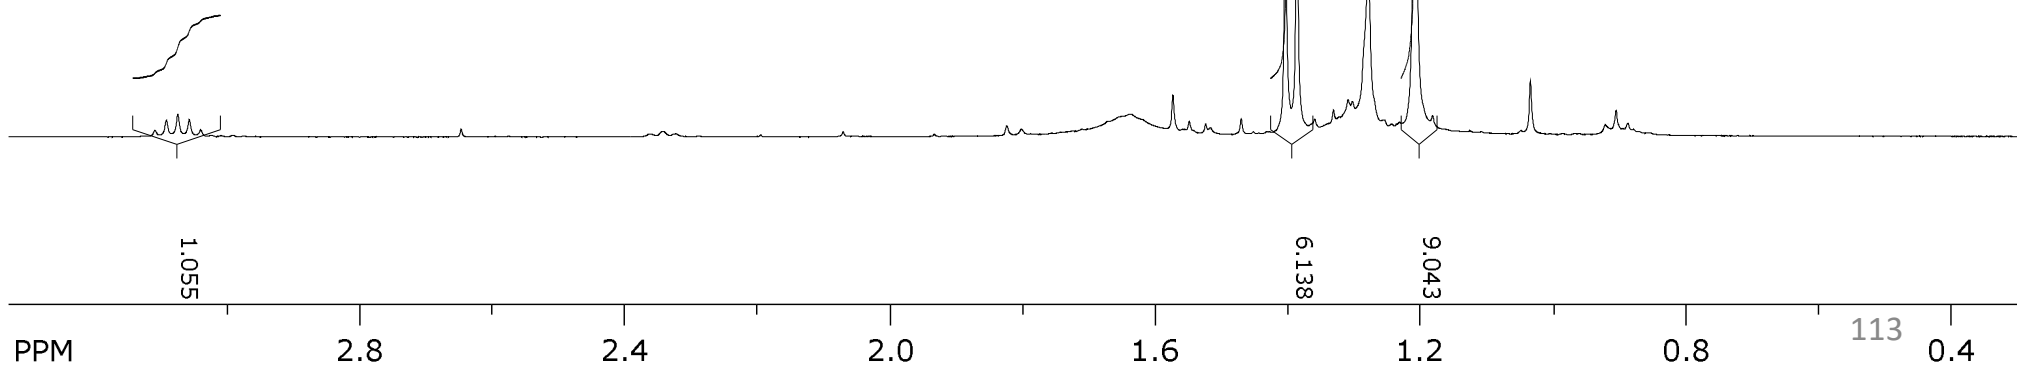

SpinWorks 4: AD 1957  
C13CPD CDCl3 /opt/topspin3.5pl2/nmrdata nmrsu 18

122.030  
123.932  
124.698  
125.007  
125.484  
125.574  
126.083  
126.193  
129.103  
129.311  
130.476  
131.001  
131.138  
137.037  
139.103  
141.364  
148.293  
148.381  
149.756  
163.696  
169.532

76.718  
77.035  
77.353  
51.755  
55.239  
33.941  
28.483  
24.011

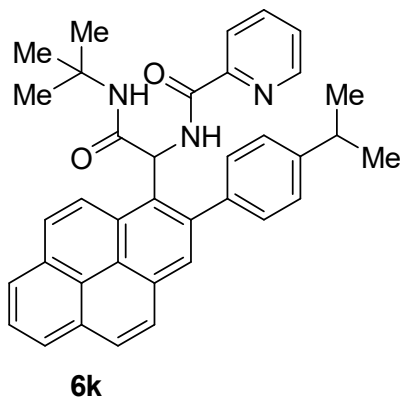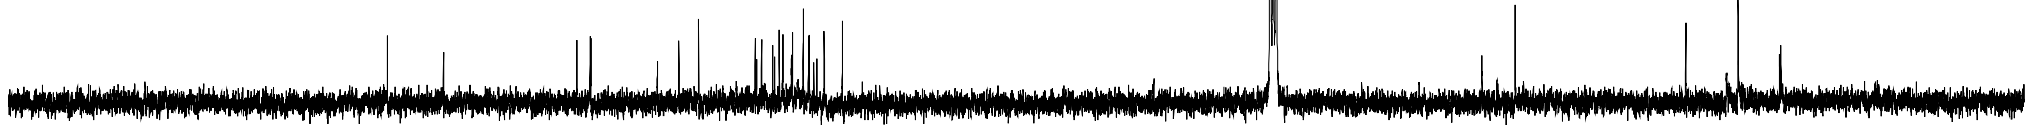

PPM

160

120

80

40

114

SpinWorks 4: AD 1957  
C13CPD CDCl3 /opt/topspin3.5pl2/nmrdata nmrsu 18

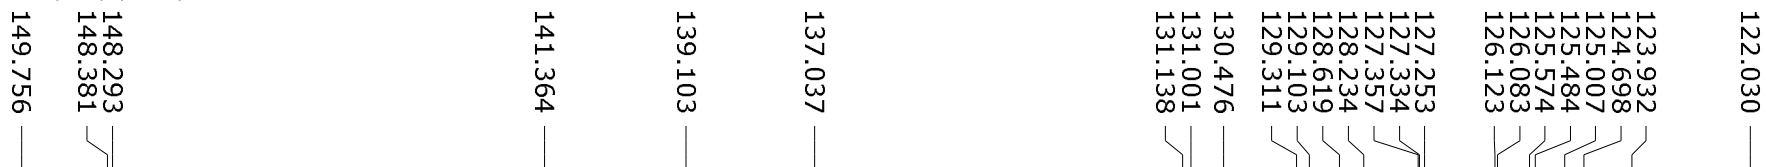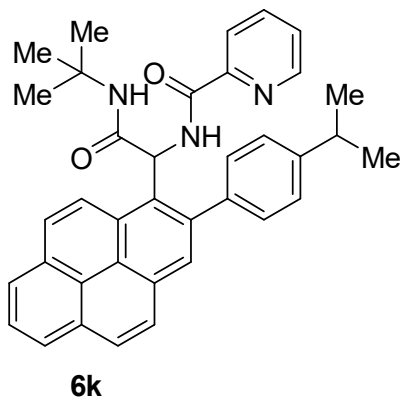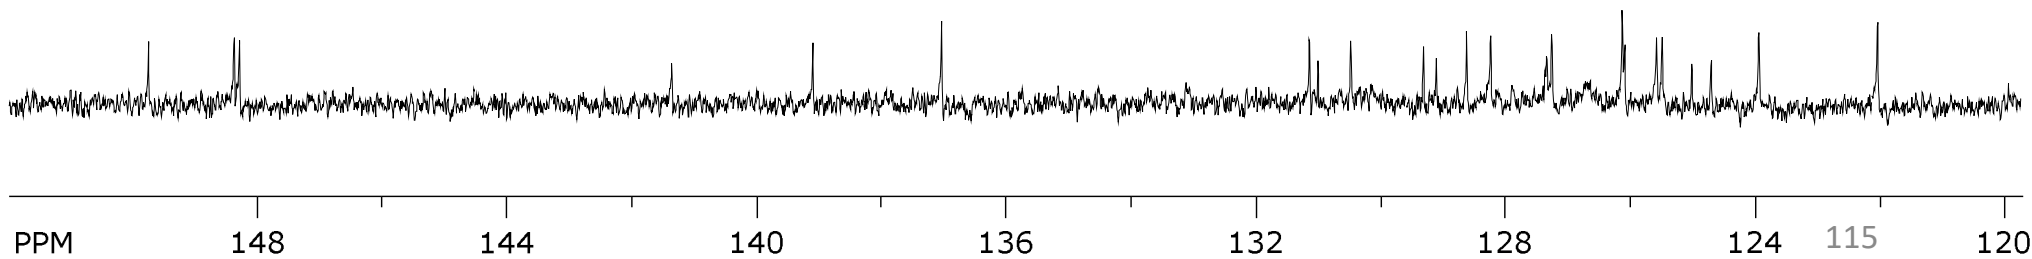

SpinWorks 4: AD 2101  
PROTON CDCl3 /opt/topspin3.5pl2/nmrdata nmrsu 24

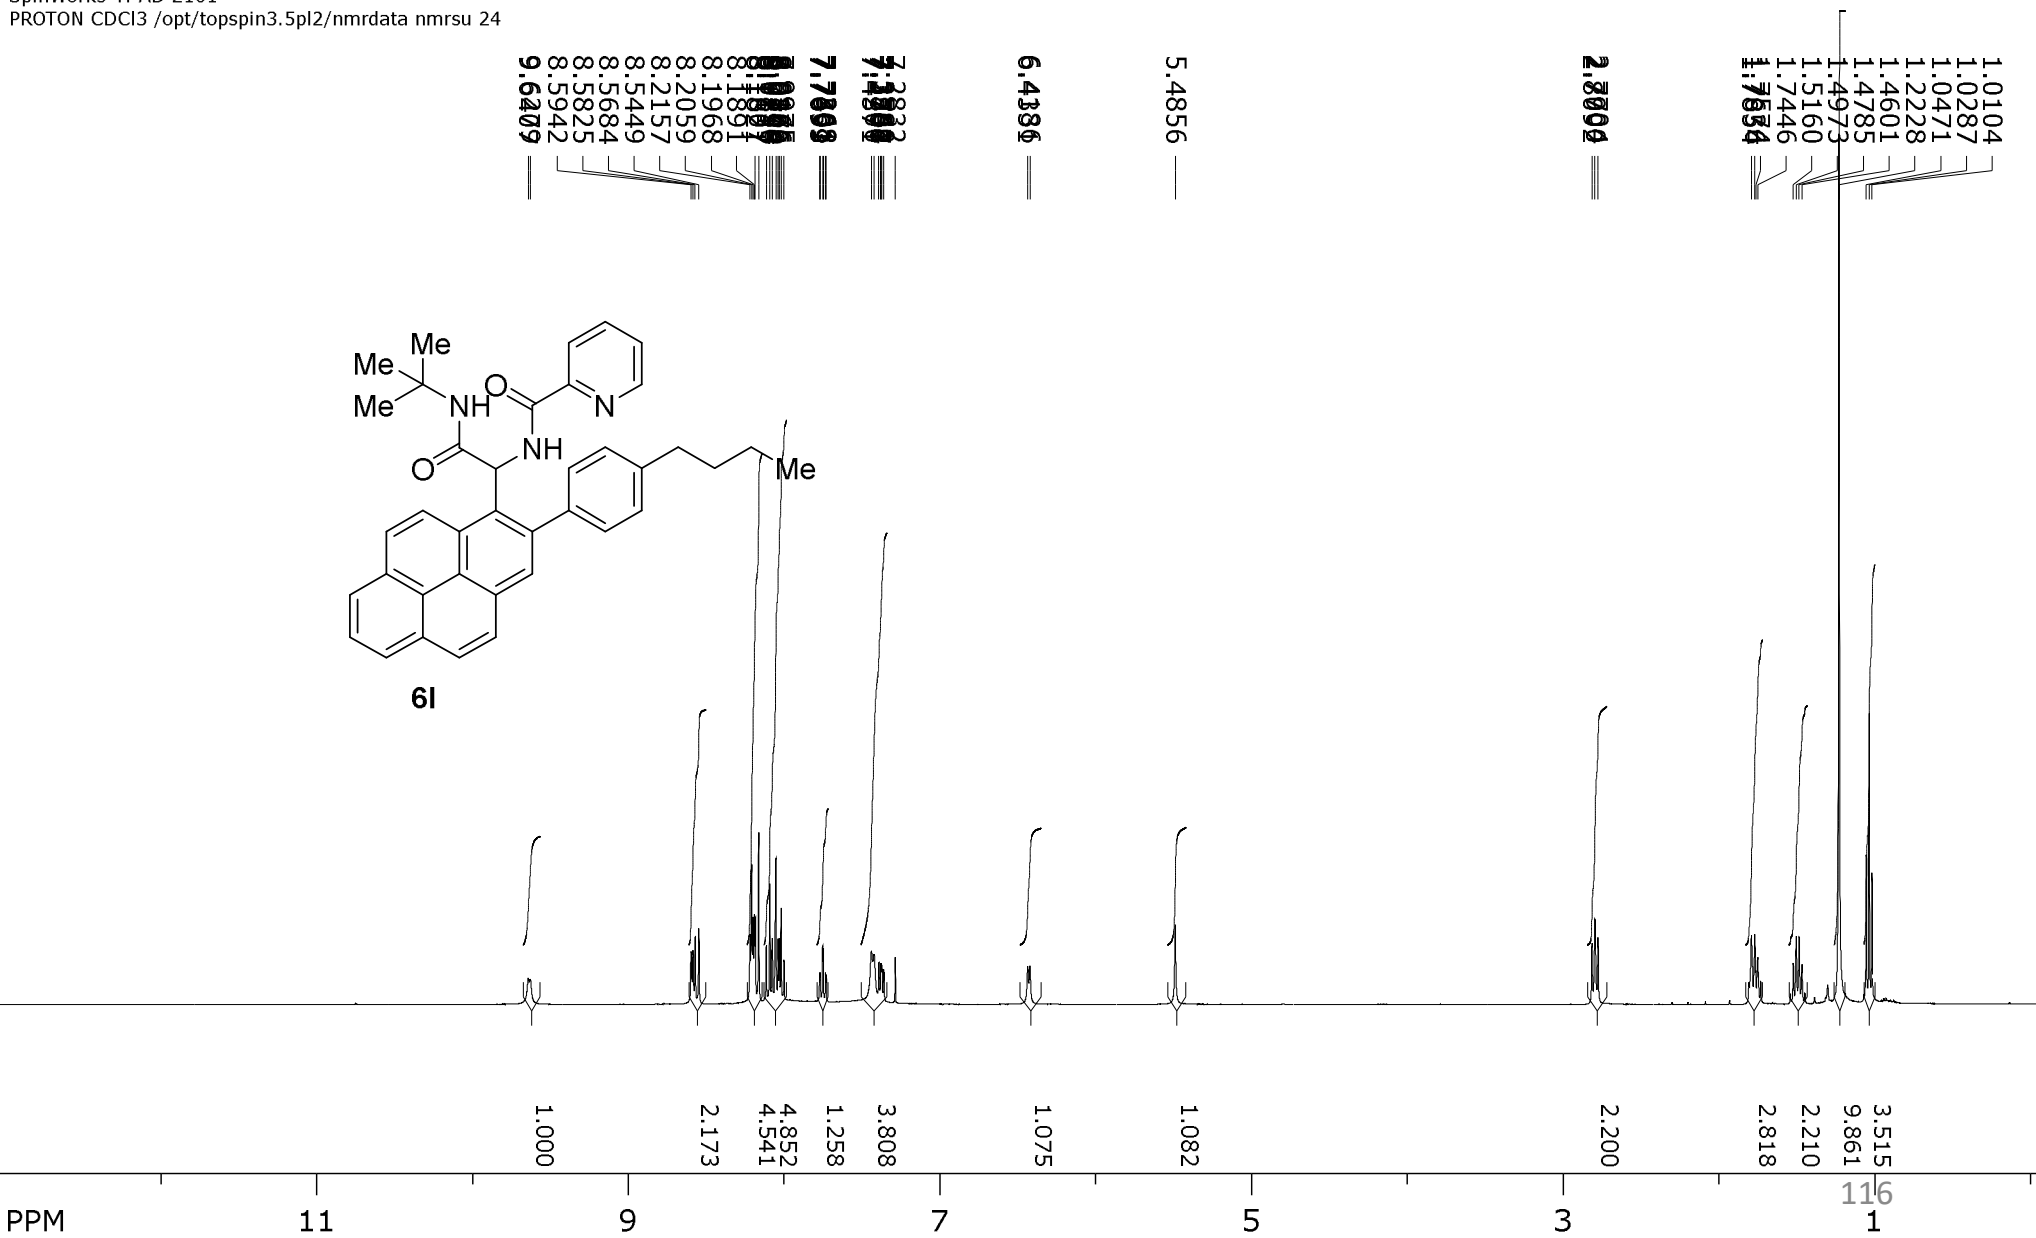

SpinWorks 4: AD 2101  
PROTON CDCl3 /opt/topspin3.5pl2/nmrdata nmrsu 24

9.6479  
==

8.5449  
8.5684  
8.5825  
8.5942

7.9975  
8.0166  
8.0276  
8.0356  
8.0504  
8.0734  
8.0896  
8.1119  
8.1607  
8.1821  
8.1891  
8.1968  
8.2059  
8.2157

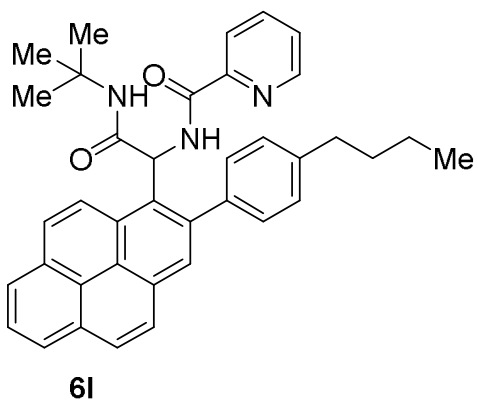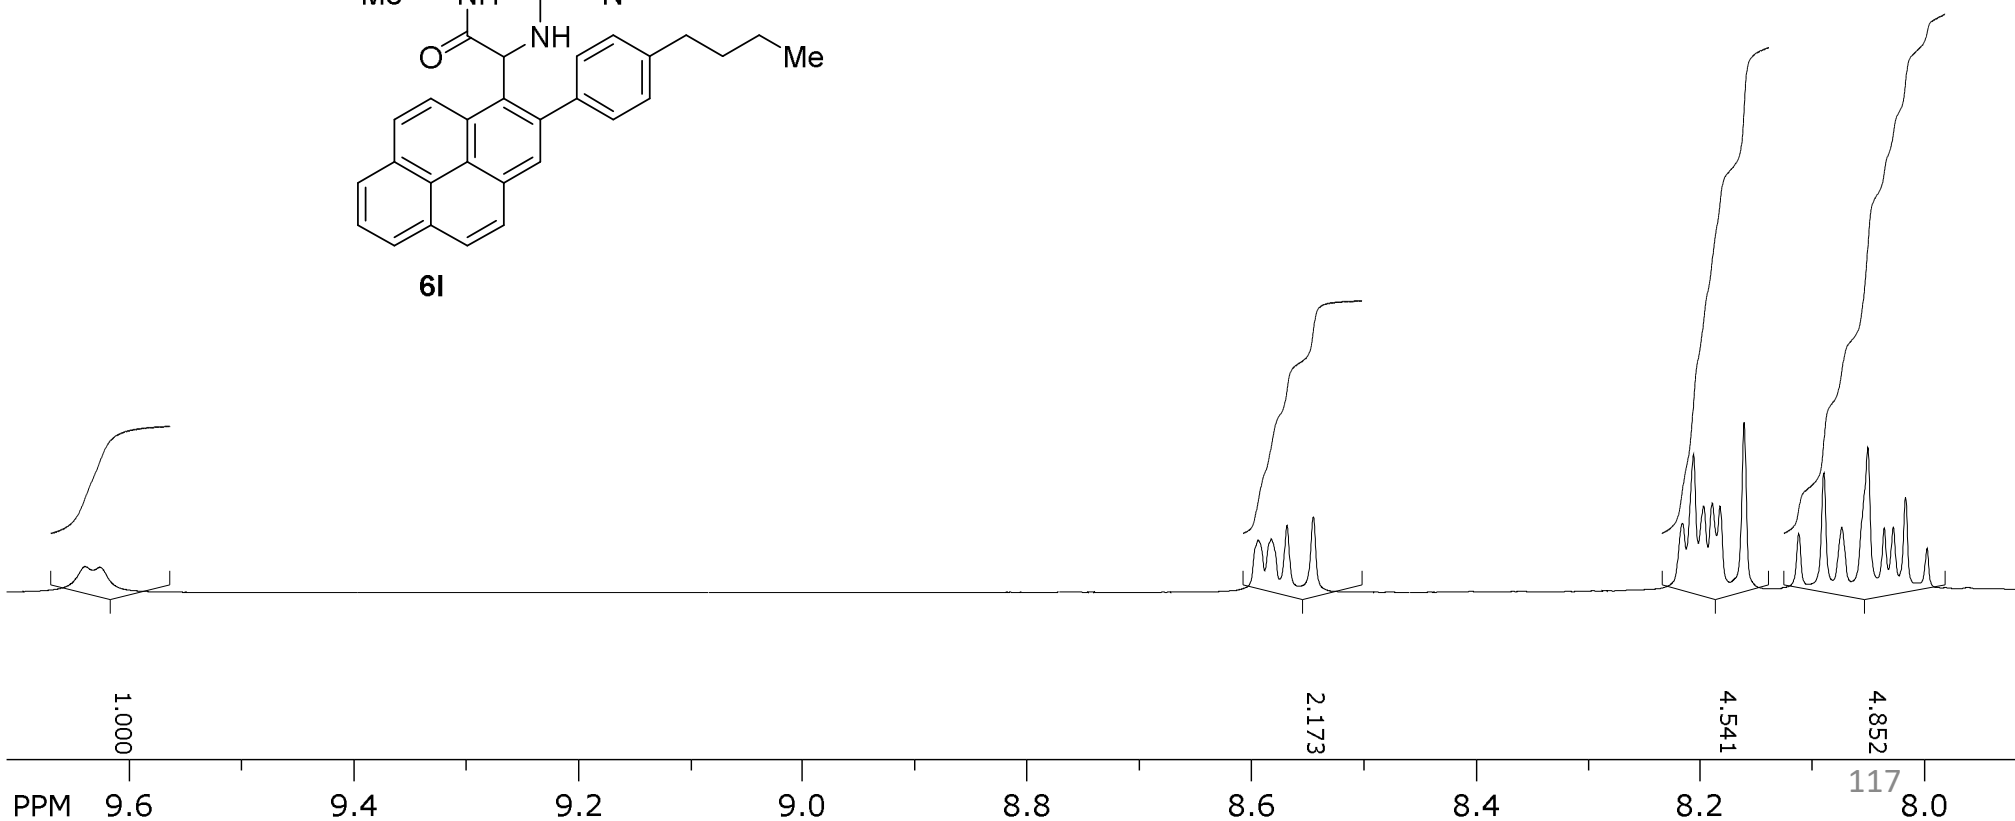

SpinWorks 4: AD 2101  
PROTON CDCl3 /opt/topspin3.5pl2/nmrdata nmrsu 24

7.7268  
7.7308  
7.7461  
7.7501  
7.7653  
7.7693

7.2832  
7.3580  
7.3701  
7.3744  
7.3767  
7.3888  
7.4200  
7.4371

6.4186  
6.4331

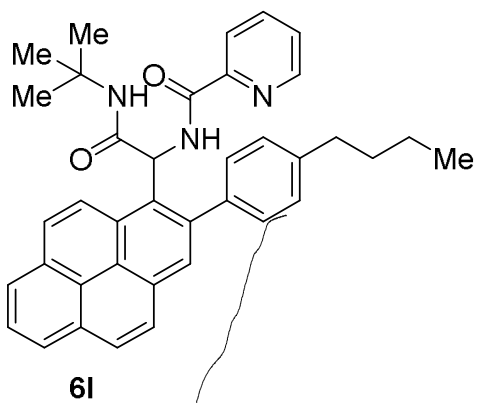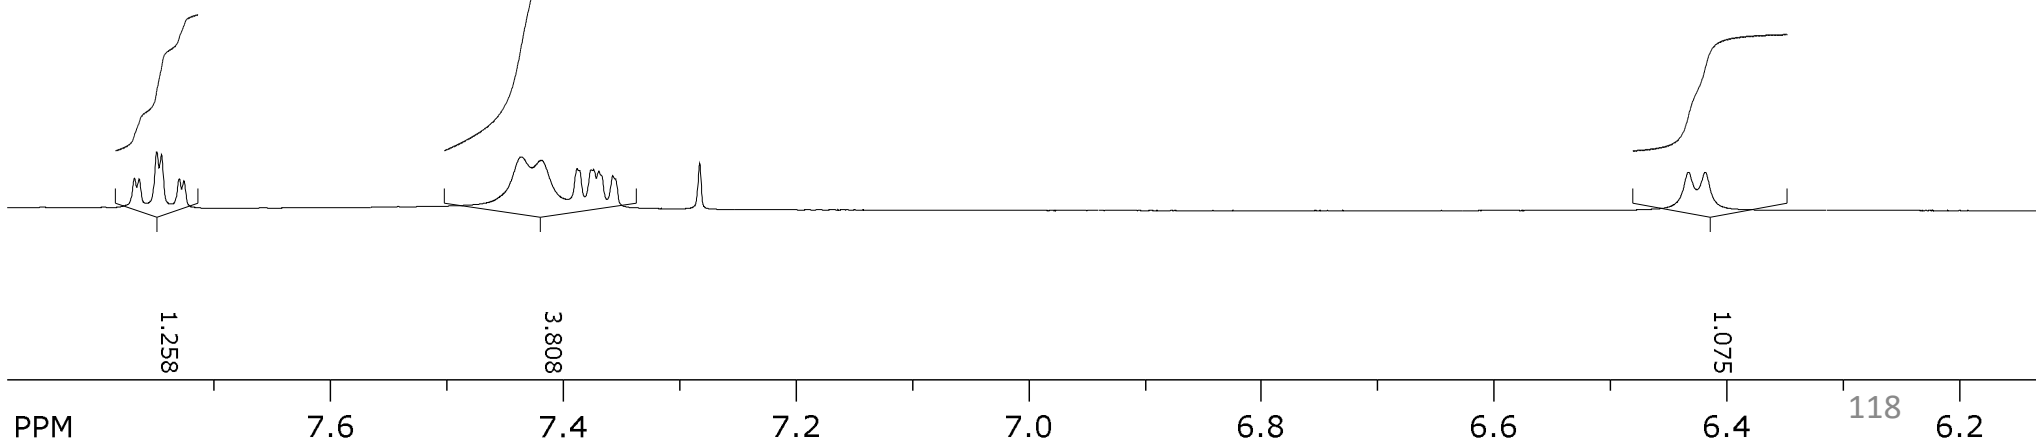

SpinWorks 4: AD 2101  
PROTON CDCl3 /opt/topspin3.5pl2/nmrdata nmrsu 24

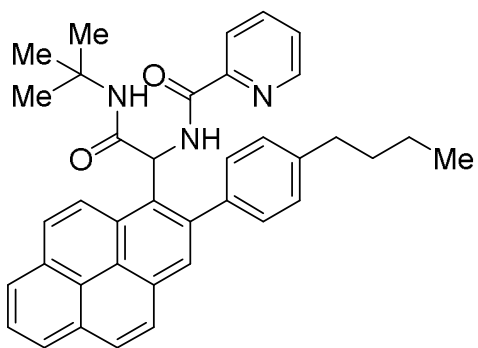

2.7704  
2.7900  
2.8092

1.7446  
1.7574  
1.7636  
1.7854

1.4601  
1.4785  
1.4973  
1.5160

1.22228

1.0104  
1.0287  
1.0471

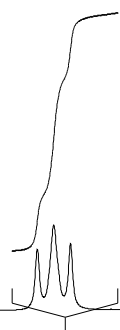

2.200

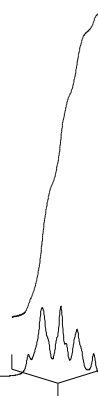

2.818

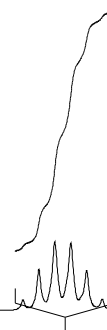

2.210

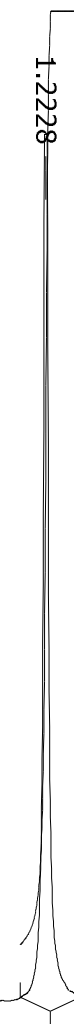

9.861

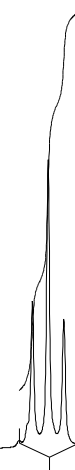

3.515

PPM

2.8

2.4

2.0

1.6

1.2

119

0.8





SpinWorks 4: AD-2101  
C13CPD256 CDCl3 /opt/topspin3.5pl2/nmrdata nmrsu 8

149.728 —  
148.300 —  
142.533 —  
141.356 —  
138.969 —  
137.058 —  
122.041 —  
123.921 —  
124.689 —  
125.011 —  
125.498 —  
125.600 —  
126.120 —  
126.135 —  
127.245 —  
127.288 —  
128.256 —  
128.658 —  
129.116 —  
129.343 —  
130.198 —  
130.462 —  
131.006 —  
131.122 —

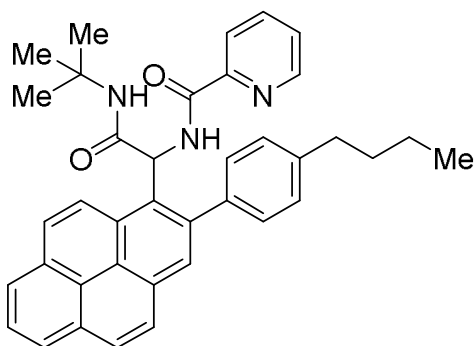

6I

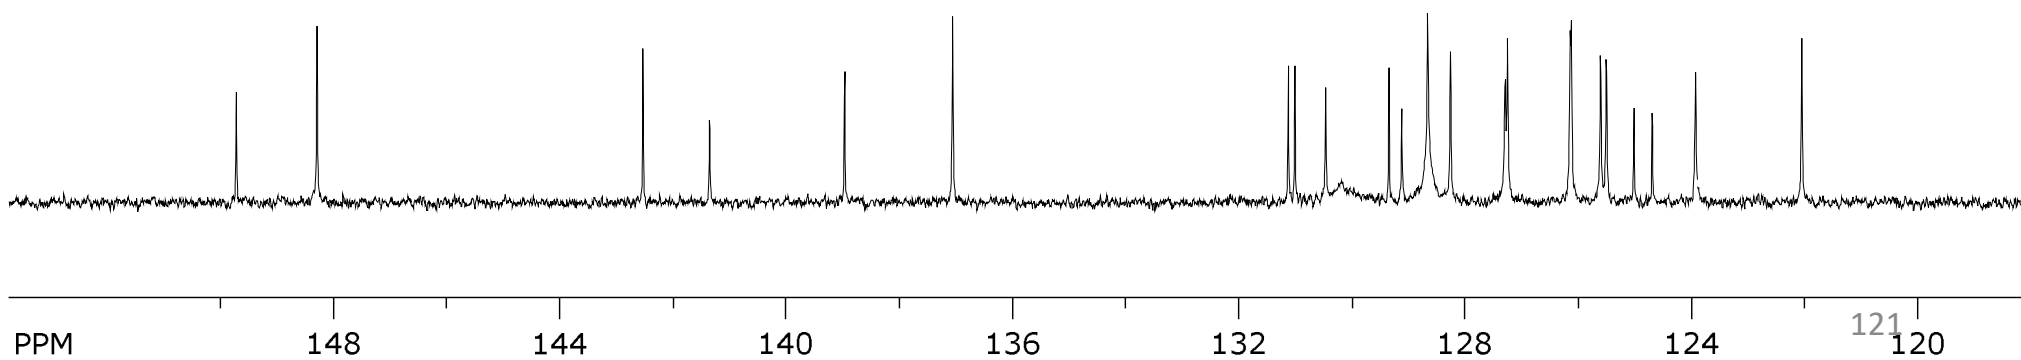

SpinWorks 4: SUB-61  
PROTON CDCl3 /opt/topspin3.5pl2/nmrdata nmrsu 24

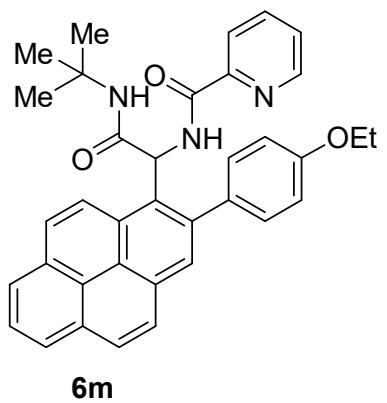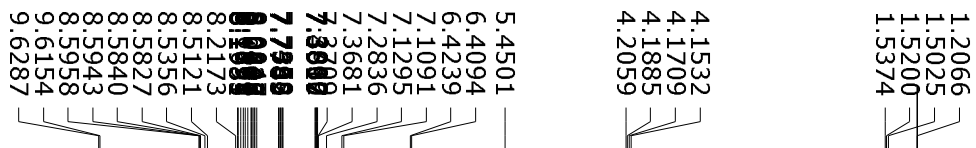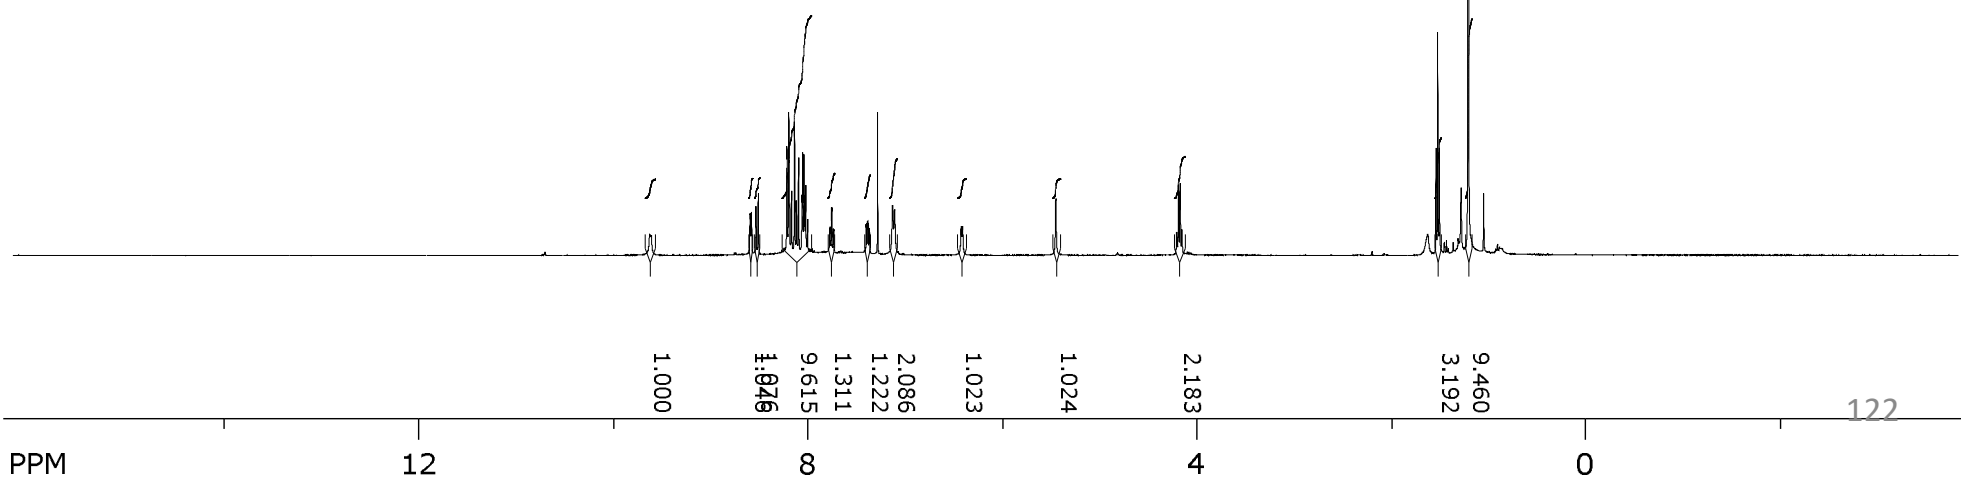

SpinWorks 4: SUB-61  
PROTON CDCl3 /opt/topspin3.5pl2/nmrdata nmrsu 24

9.6154  
9.6287

8.5121  
8.5356  
8.5827  
8.5840  
8.5943  
8.5958

8.0047  
8.0249  
8.0427  
8.0548  
8.0608  
8.0972  
8.1195  
8.1391  
8.1695  
8.1935  
8.1981  
8.2173

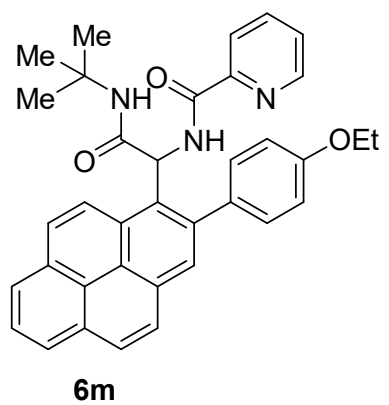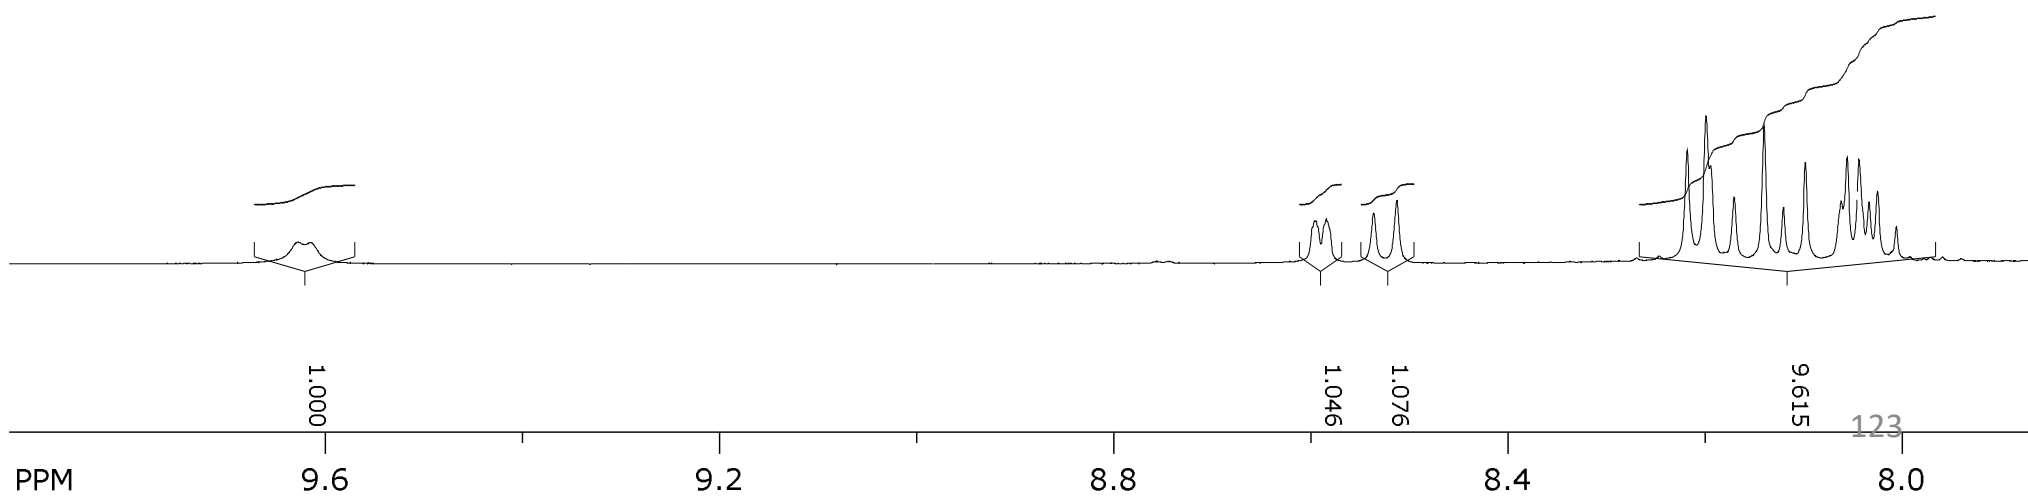

SpinWorks 4: SUB-61  
PROTON CDCl3 /opt/topspin3.5pl2/nmrdata nmrsu 24

7.7358  
7.7400  
7.7552  
7.7593  
7.7743  
7.7785

7.3681  
7.3709  
7.3802  
7.3830  
7.3869  
7.3897  
7.3990  
7.4017

7.2836

7.1091  
7.1295

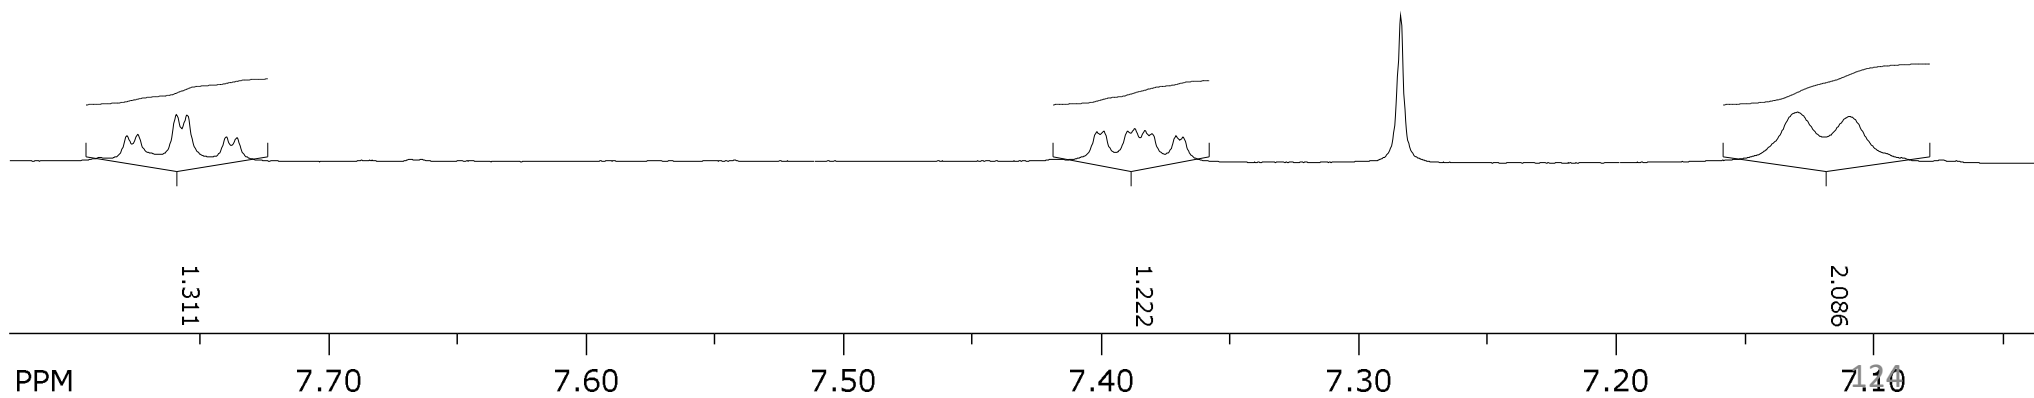

SpinWorks 4: SUB-61  
PROTON CDCl3 /opt/topspin3.5pl2/nmrdata nmrsu 24

6.4094  
6.4239

5.4501

4.1532  
4.1709  
4.1885  
4.2059

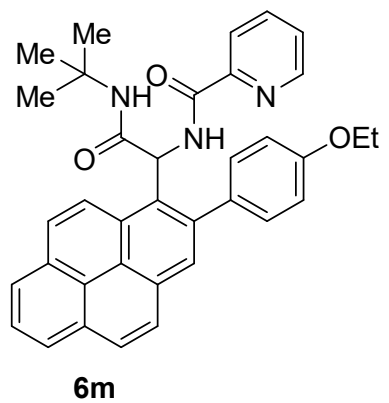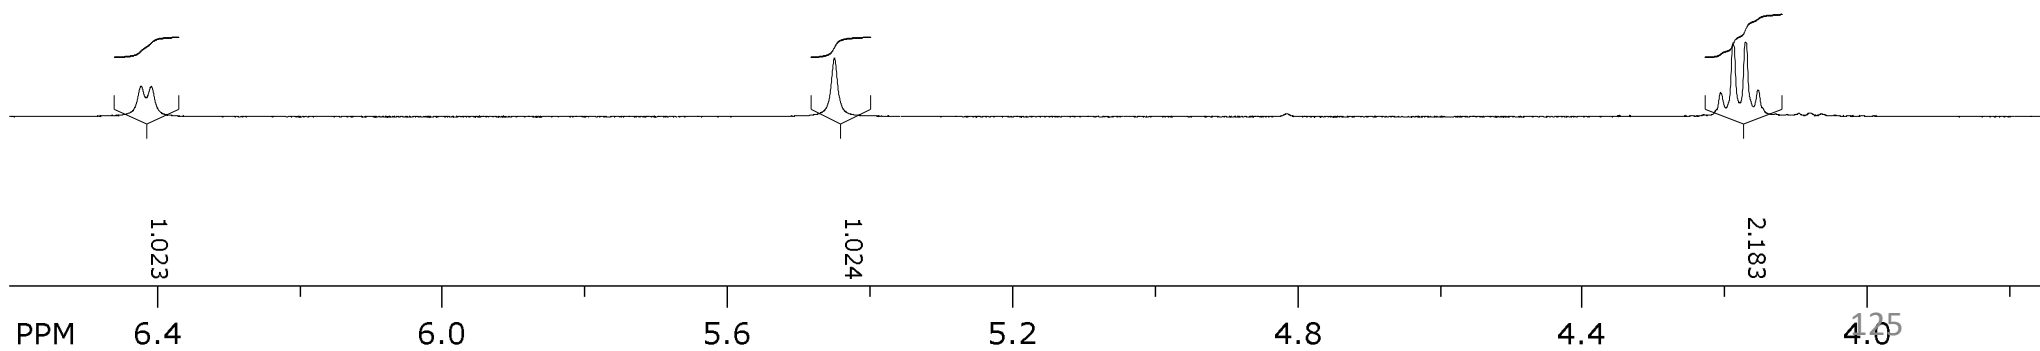

SpinWorks 4: SUB-61  
PROTON CDCl3 /opt/topspin3.5pl2/nmrdata nmrsu 24

1.5025  
1.5200  
1.5374

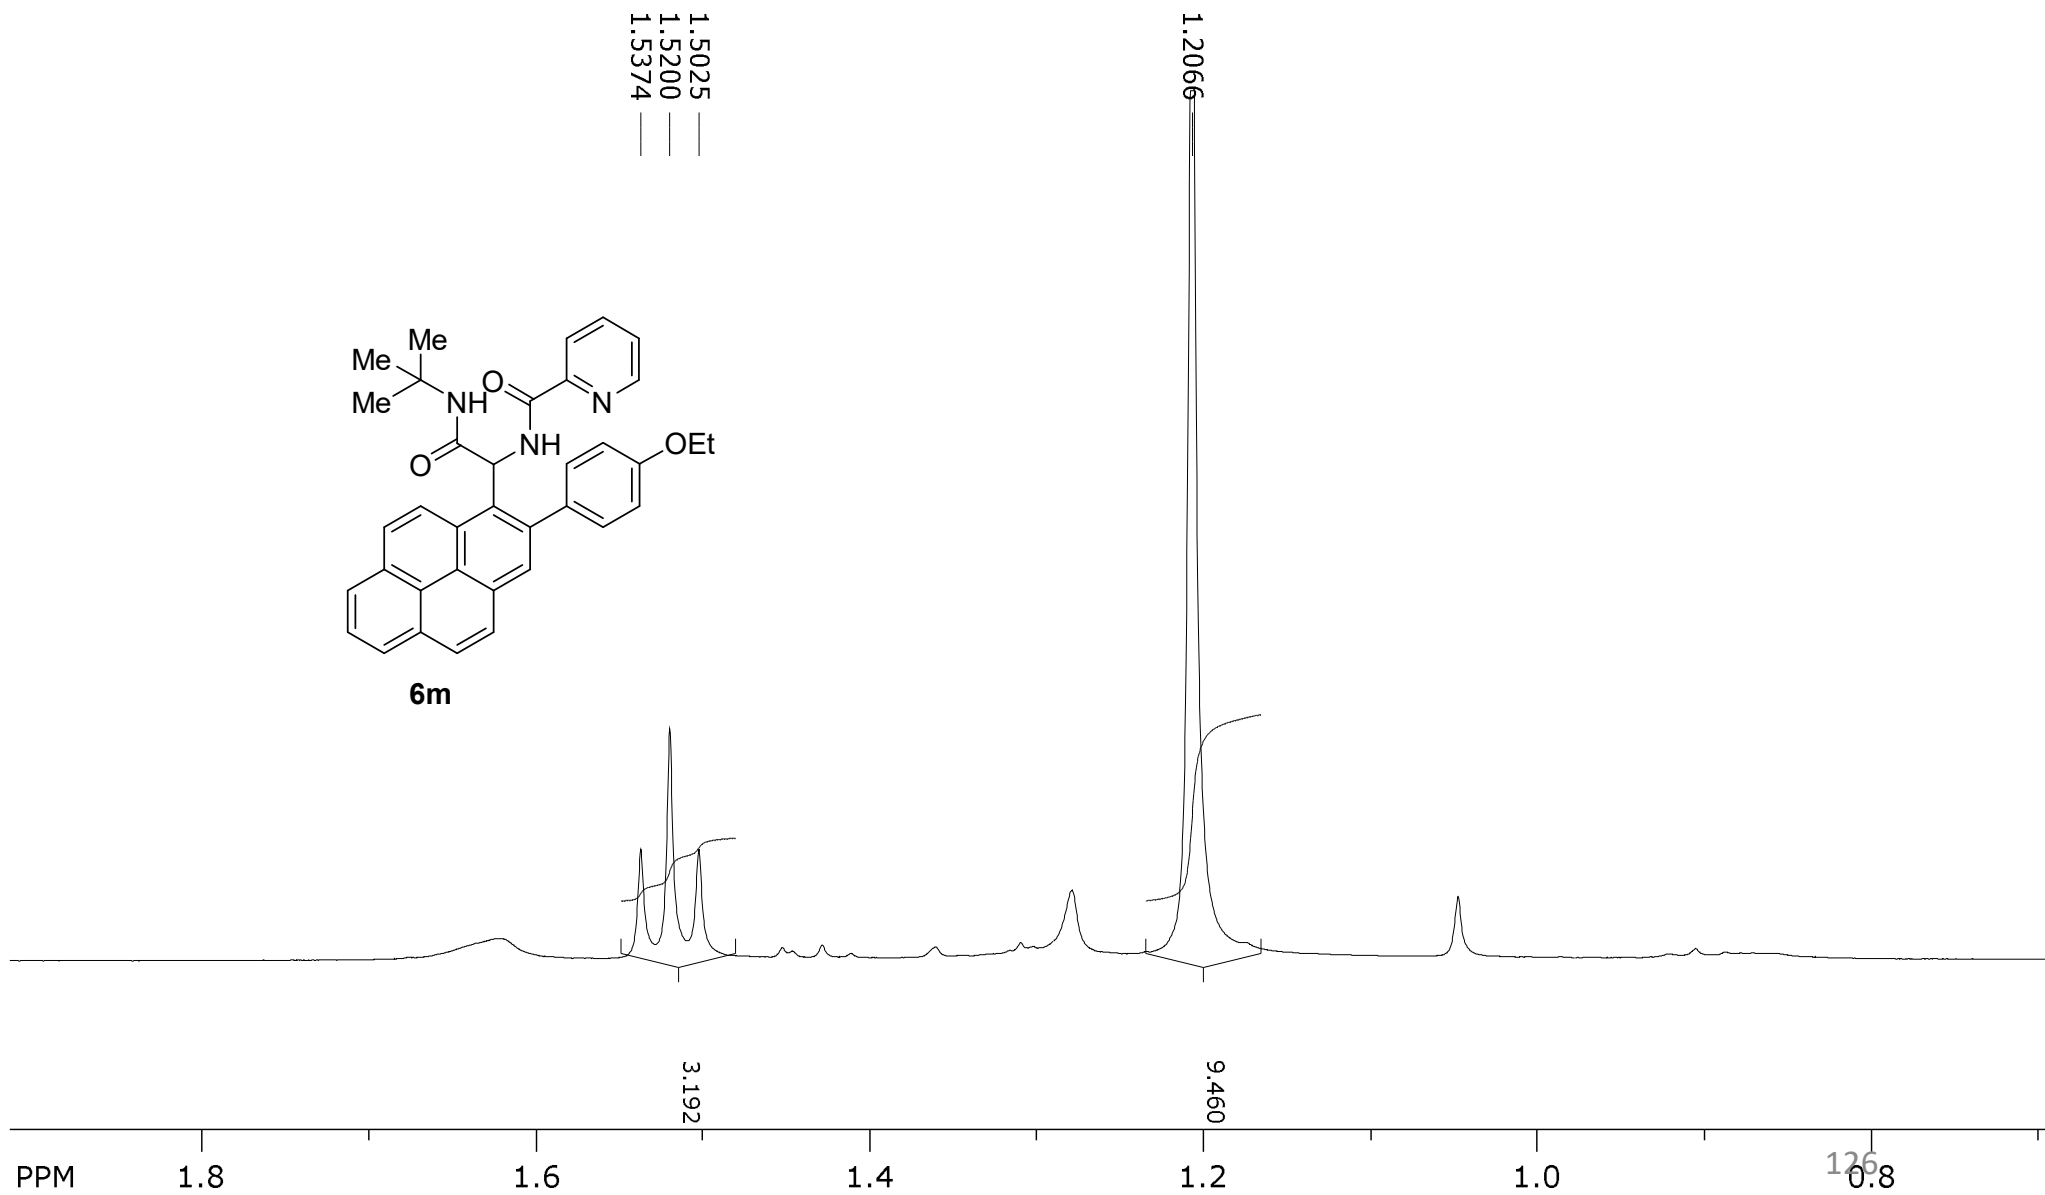

SpinWorks 4: SUB 61  
C13CPD256 CDCl3 /opt/topspin3.5pl2/nmrdata nmrsu 18

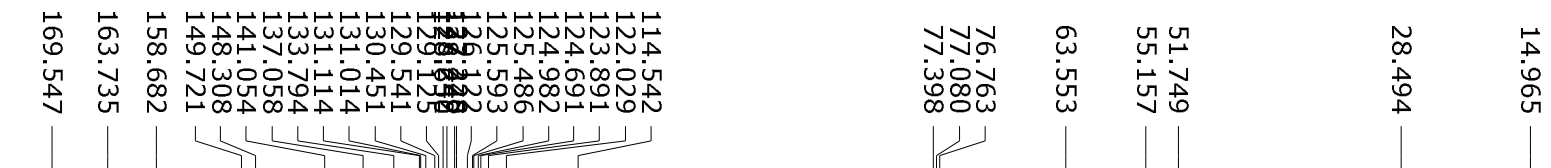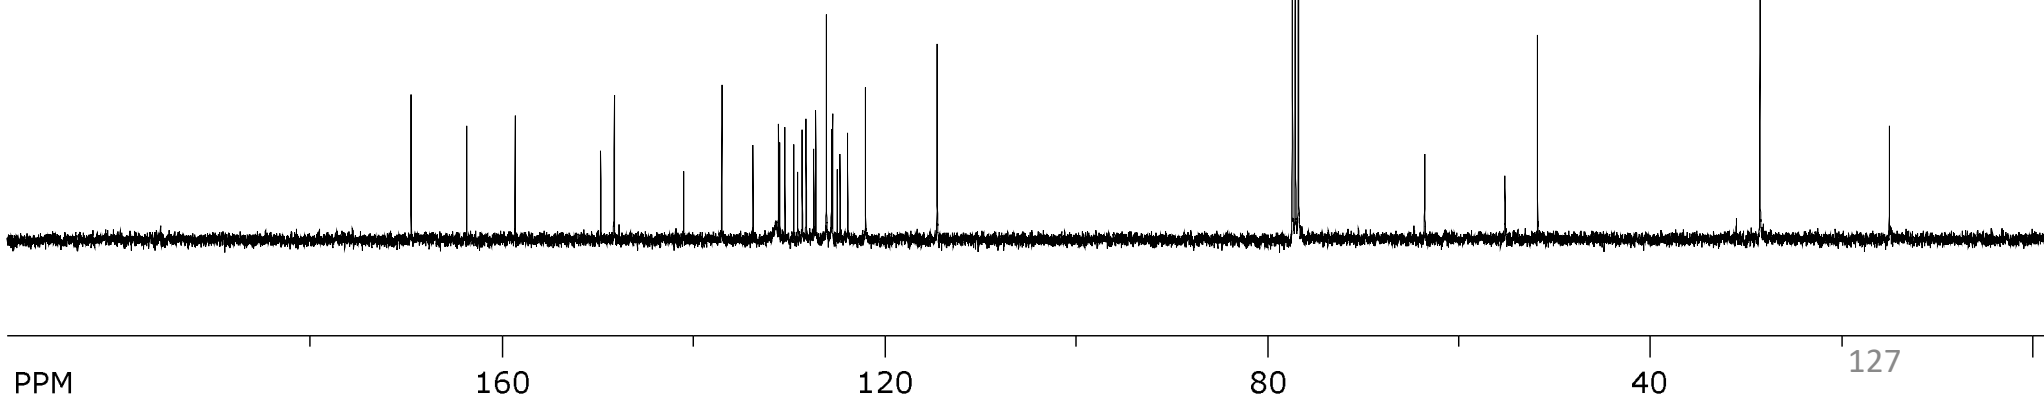

SpinWorks 4: SUB 61  
C13CPD256 CDCl3 /opt/topspin3.5pl2/nmrdata nmrsu 18

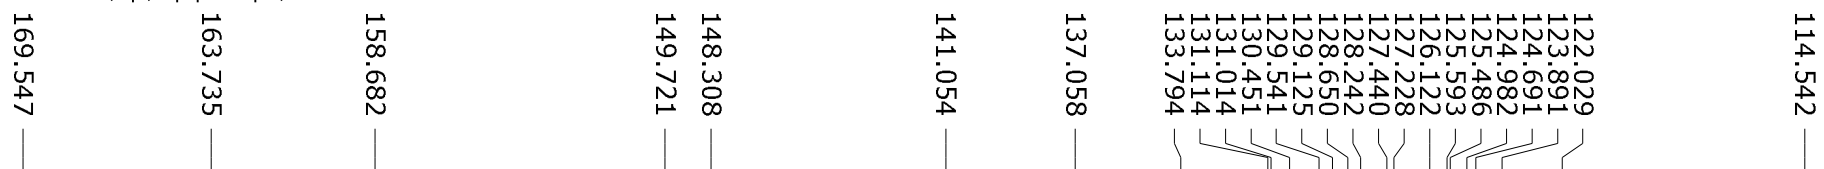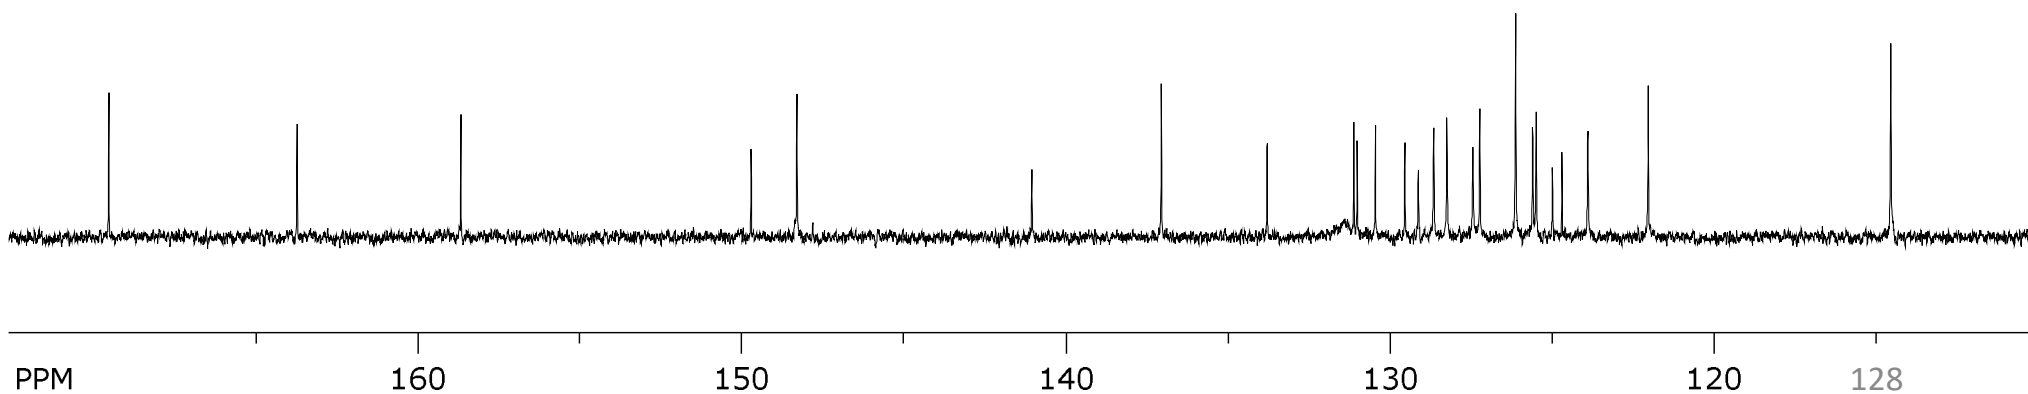



SpinWorks 4: AD 2086  
PROTON CDCl3 /opt/topspin3.5pl2/nmrdata nmrsu 21

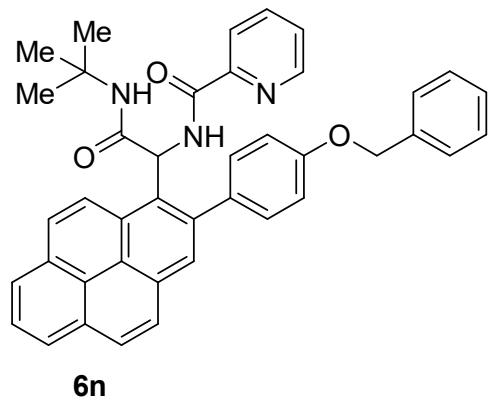

9.6388  
9.6251  
9.5911  
8.5794  
8.5546  
8.5312  
8.2195  
8.2143  
8.2067  
7.9919  
7.9868  
7.9817  
7.3623  
7.3598  
7.3598  
7.2833  
7.2323  
7.2126  
7.2126  
6.4519  
6.4374  
5.4721  
5.2176

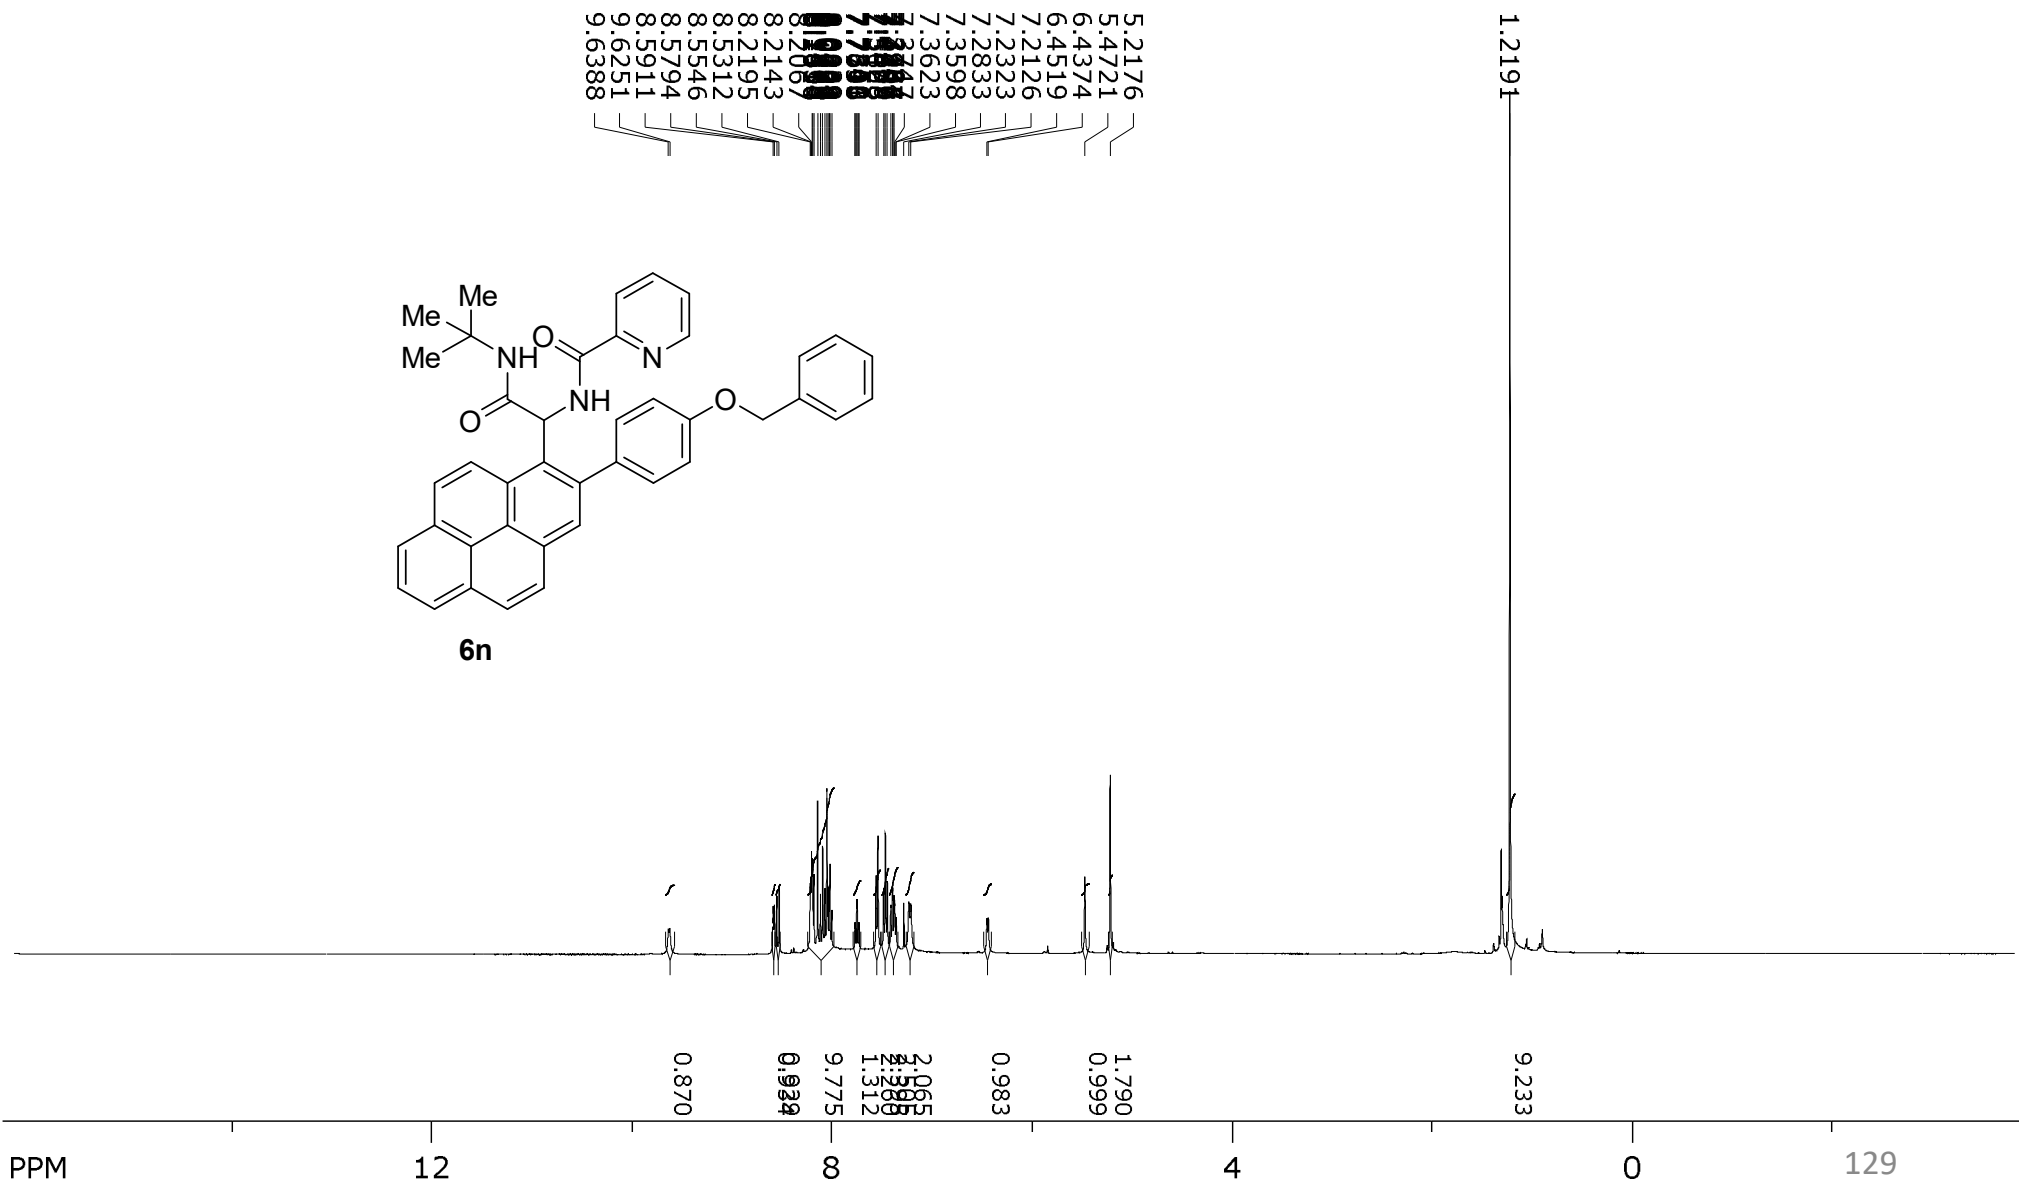

SpinWorks 4: AD 2086  
PROTON CDCl3 /opt/topspin3.5pl2/nmrdata nmrsu 21

8.5312 —  
8.5546 —  
8.5794 —  
8.5911 —

8.0039 —  
8.0229 —  
8.0304 —  
8.0420 —  
8.0531 —  
8.0736 —  
8.0950 —  
8.1175 —  
8.1460 —  
8.1834 —  
8.1956 —  
8.2010 —  
8.2067 —  
8.2143 —  
8.2195 —

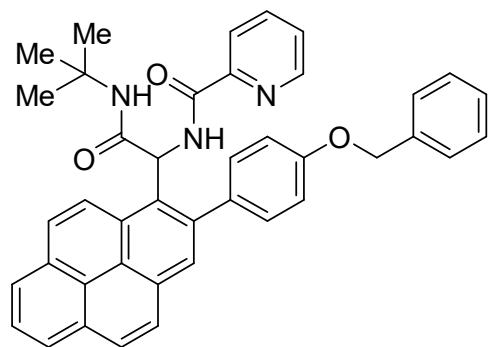

**6n**

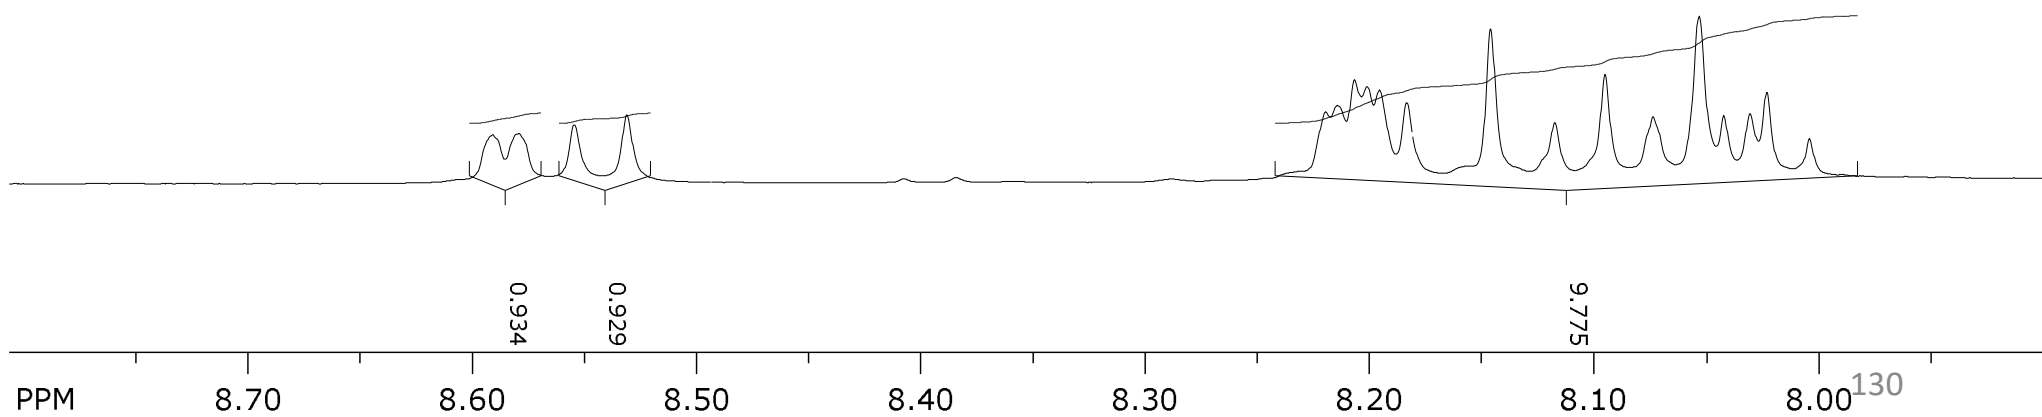

SpinWorks 4: AD 2086  
PROTON CDCl3 /opt/topspin3.5pl2/nmrdata nmrsu 21

7.7310  
7.7351  
7.7503  
7.7543  
7.7695  
7.7736

7.5423  
7.5606

7.4855  
7.4677  
7.4486

7.4145  
7.3957  
7.3907  
7.3784  
7.3747  
7.3623  
7.3598

7.2833

7.2323  
7.2126

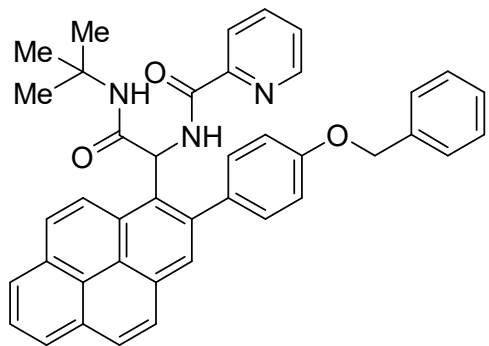

6n

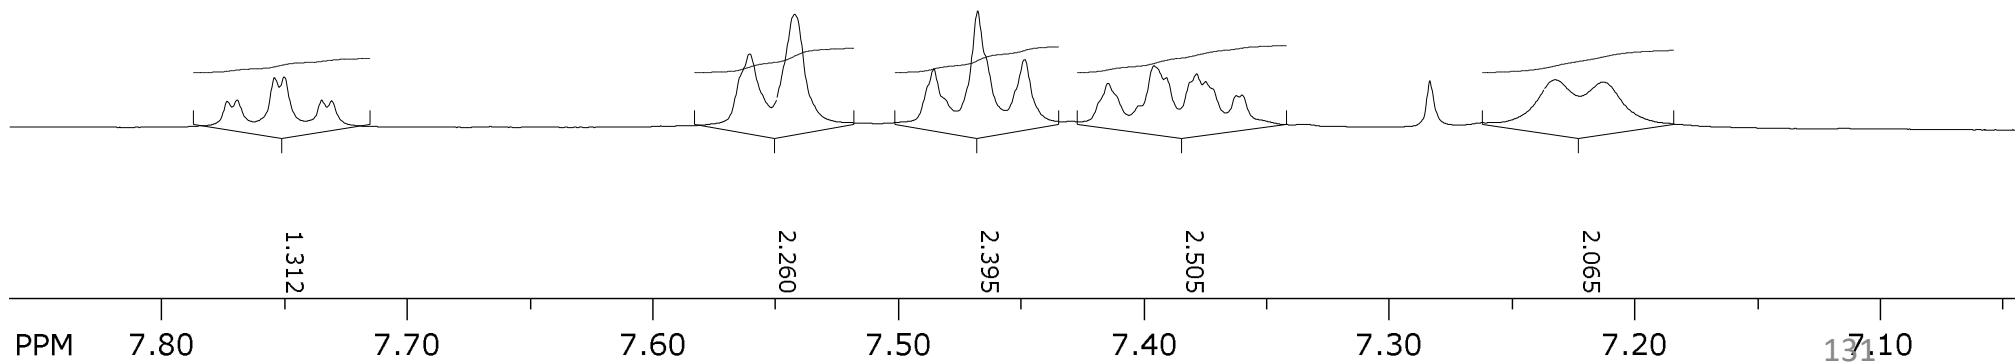

SpinWorks 4: AD 2086  
PROTON CDCl3 /opt/topspin3.5pl2/nmrdata nmrsu 21

6.4374  
6.4519

5.4721

5.2176

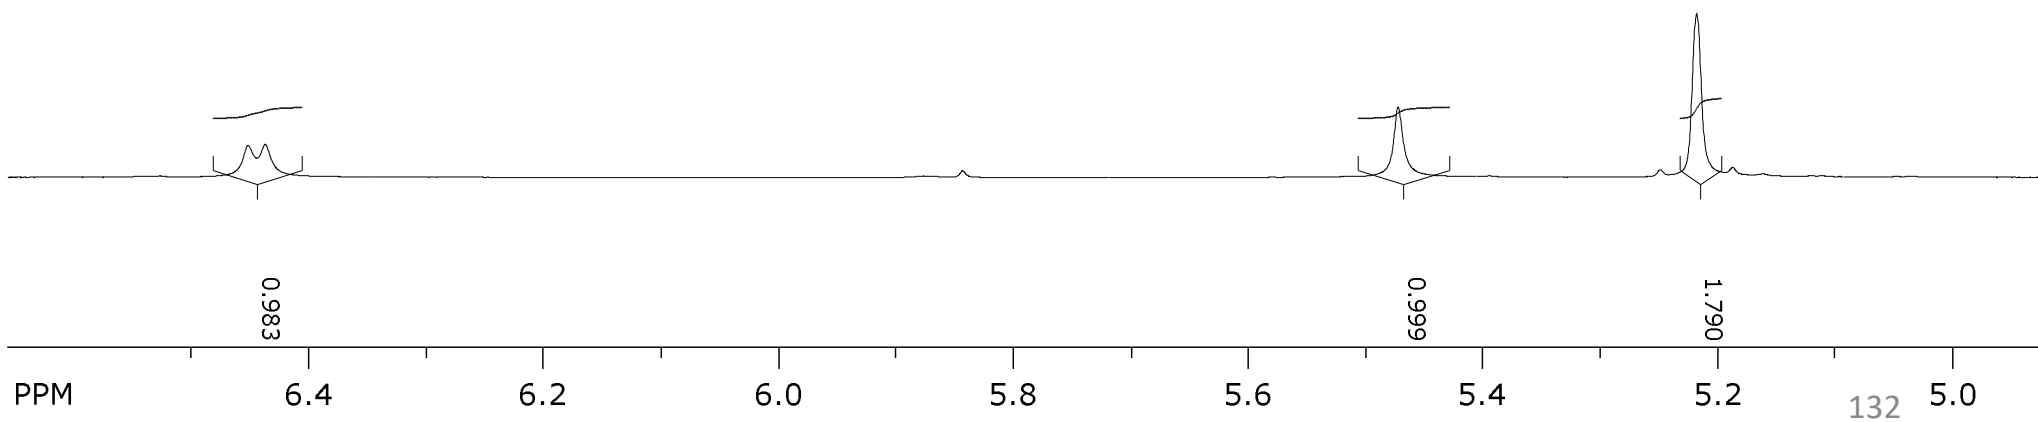

SpinWorks 4: AD-2086

C13CPD256 CDCl3 /opt/topspin3.5pl2/nmrdata nmrsu 14

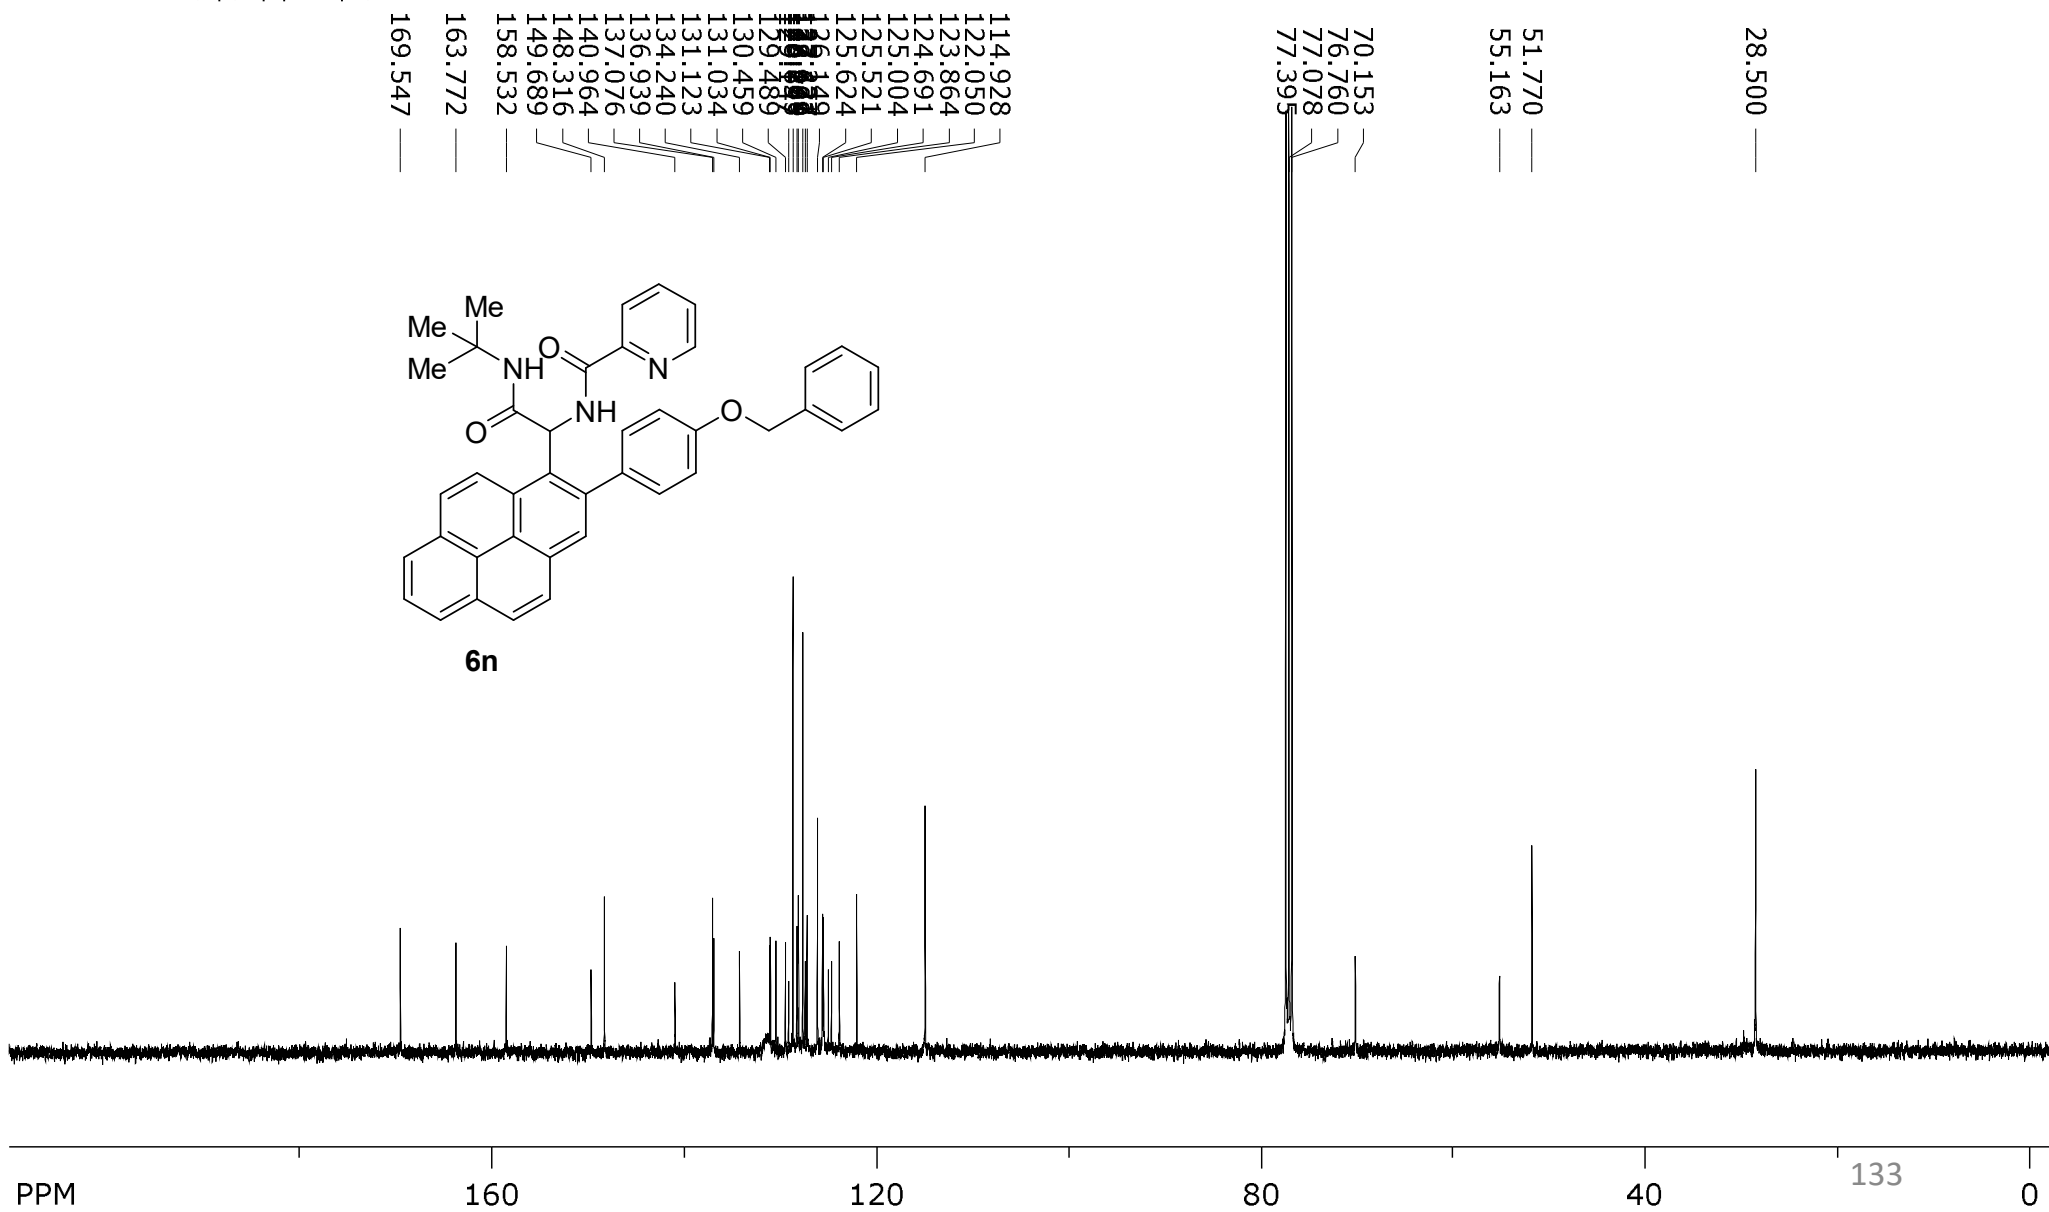

SpinWorks 4: AD-2086  
C13CPD256 CDCl3 /opt/topspin3.5pl2/nmrdata nmrsu 14

149.689 —  
148.316 —  
140.964 —  
137.076 —  
136.939 —  
134.240 —  
131.123 —  
131.034 —  
130.459 —  
129.489 —  
129.147 —  
128.695 —  
128.280 —  
128.109 —  
127.673 —  
127.421 —  
127.227 —  
126.149 —  
125.624 —  
125.521 —  
125.004 —  
124.691 —  
123.864 —  
122.050 —  
114.928 —

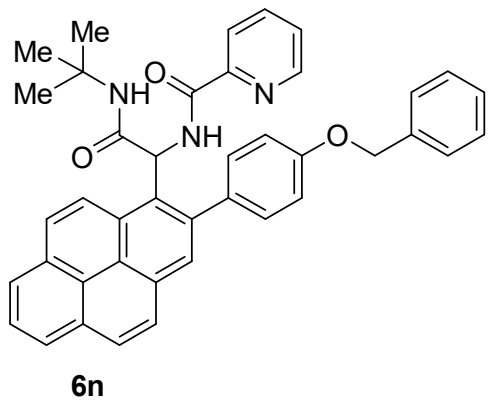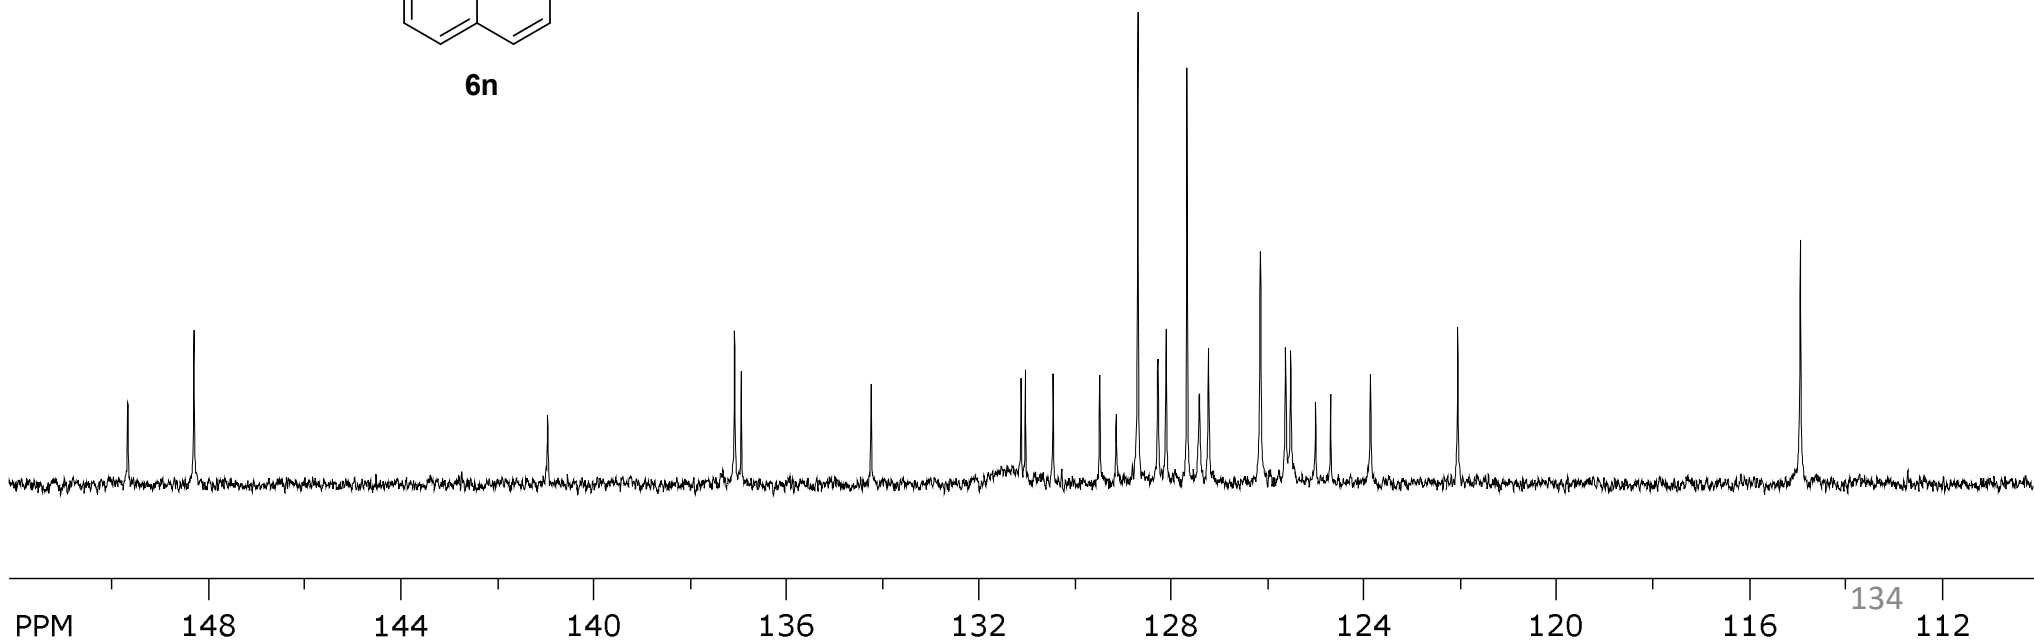

SpinWorks 4: SUB-60  
PROTON CDCl3 /opt/topspin3.5pl2/nmrdata nmrsu 22

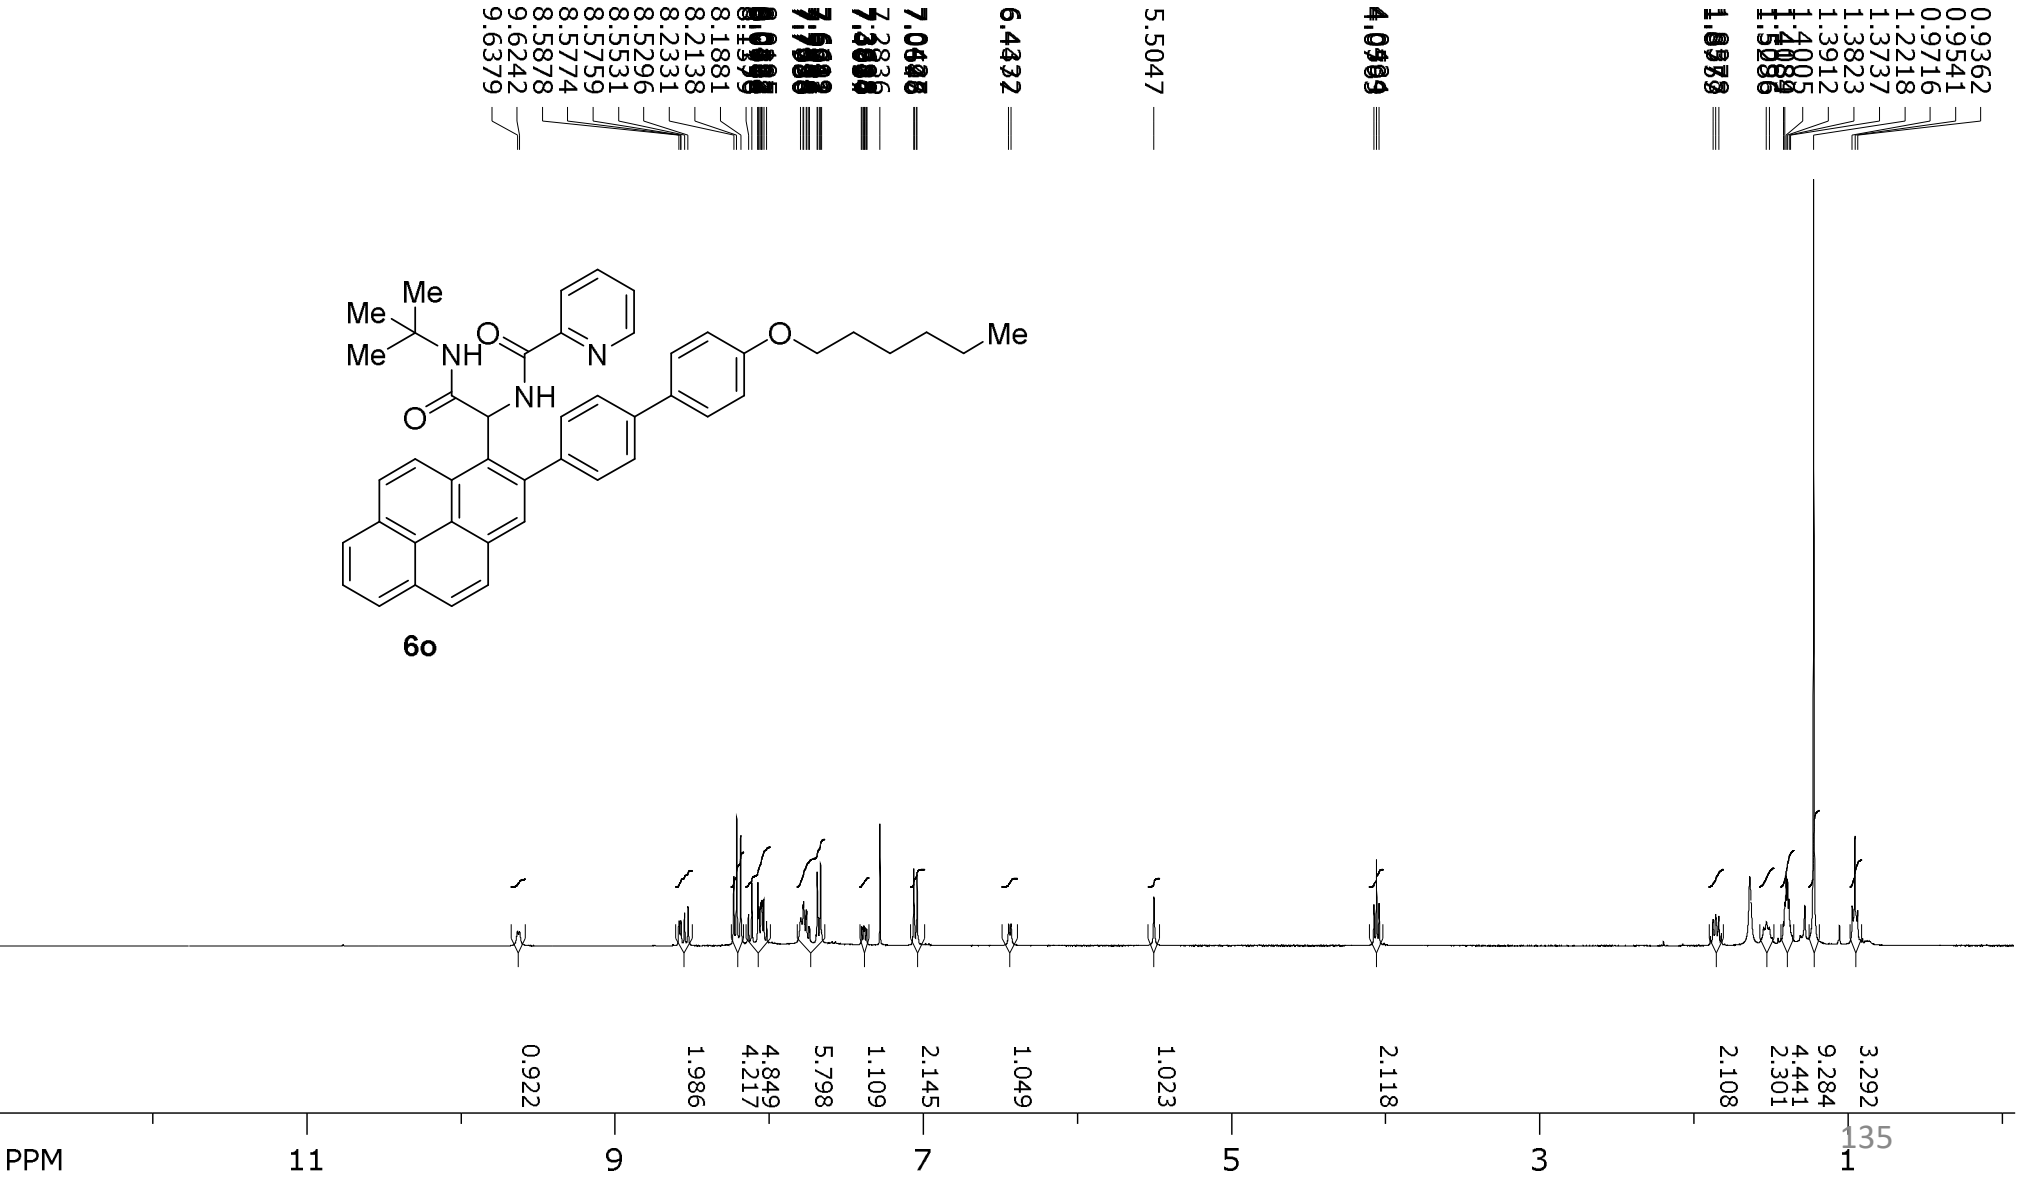

SpinWorks 4: SUB-60  
PROTON CDCl3 /opt/topspin3.5pl2/nmrdata nmrsu 22

8.5759  
8.5774  
8.5878  
8.5296  
8.5531

8.2331  
8.2138  
8.1881

8.1379  
8.1156  
8.0764  
8.0712  
8.0688  
8.0574  
8.0537  
8.0493  
8.0387  
8.0195

7.7980  
7.7828  
7.7788  
7.7638  
7.7595  
7.7444  
7.7402  
7.6911  
7.6862  
7.6742  
7.6619

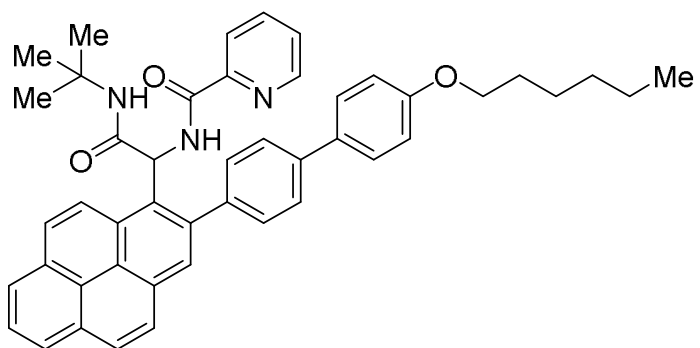

60

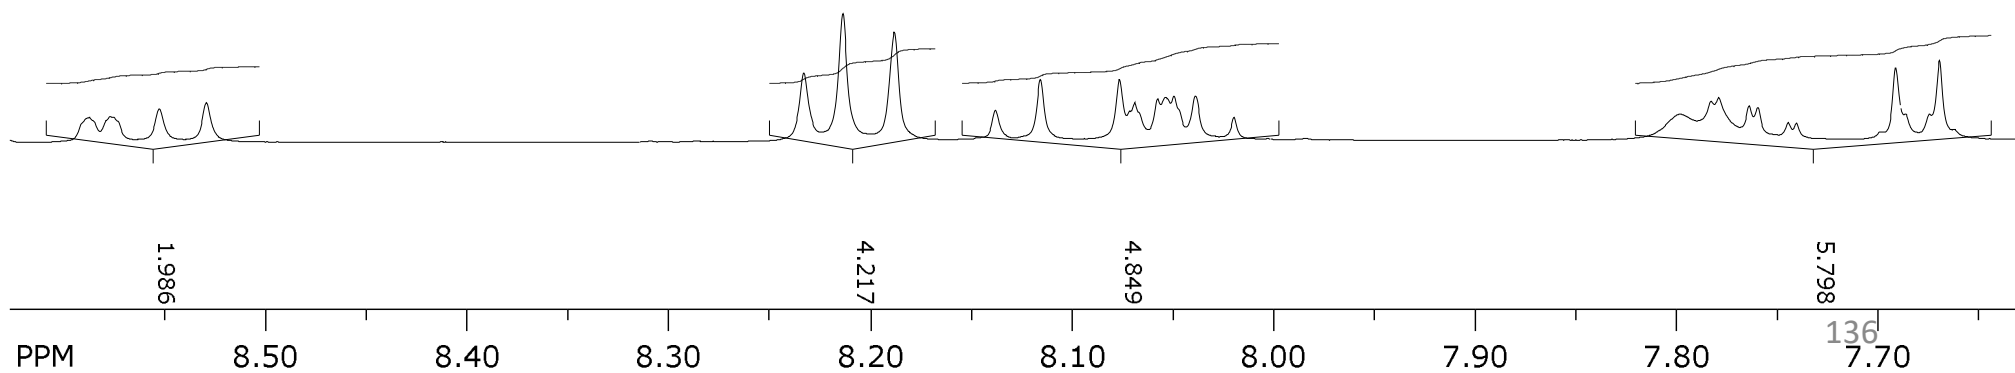



SpinWorks 4: SUB-60  
PROTON CDCl3 /opt/topspin3.5pl2/nmrdata nmrsu 22

7.3698  
7.3725  
7.3818  
7.3846  
7.3886  
7.3914  
7.4007  
7.4034  
7.2836

7.0427  
7.0475  
7.0598  
7.0646

6.4332  
6.4477

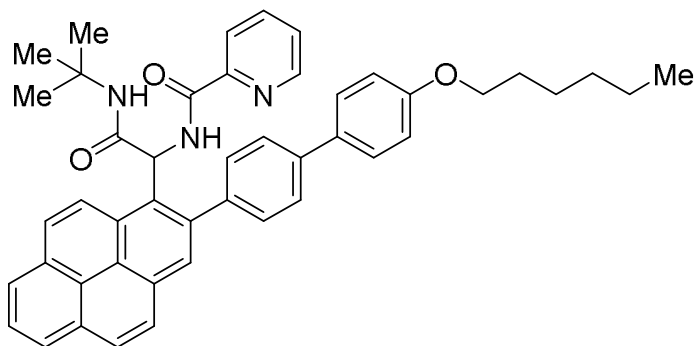

60

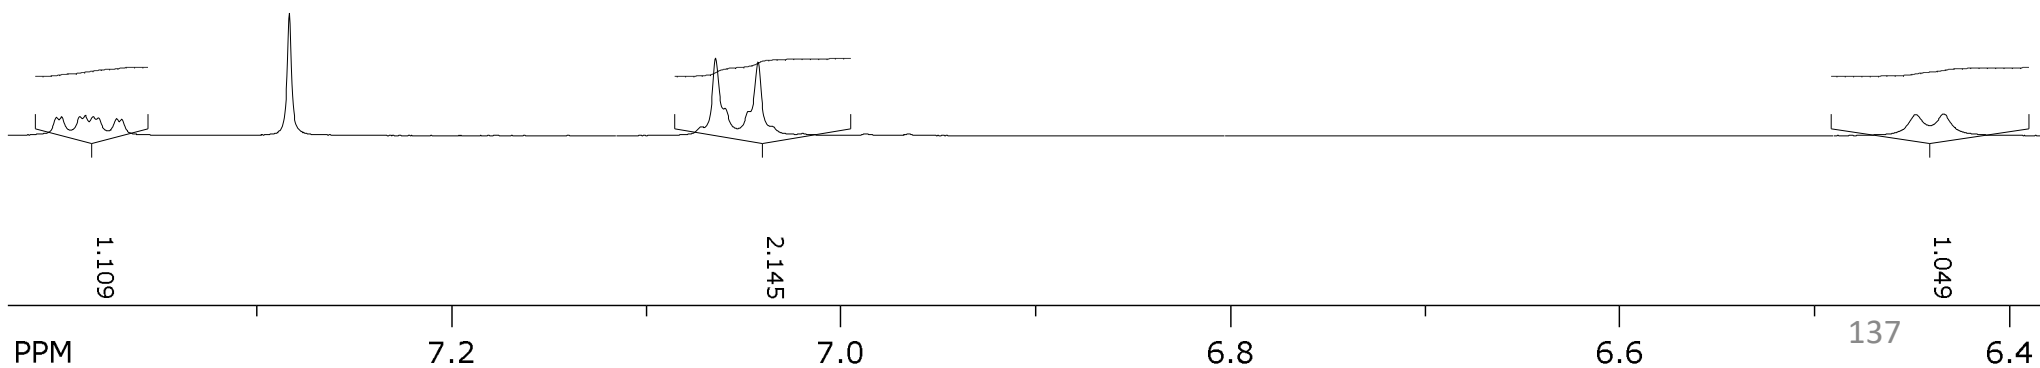

SpinWorks 4: SUB-60  
PROTON CDCl3 /opt/topspin3.5pl2/nmrdata nmrsu 22

4.0434  
4.0599  
4.0763

1.8378  
1.8577  
1.8753

1.2218  
1.3737  
1.3823  
1.3912  
1.4005  
1.4089  
1.4184  
1.5096  
1.5286

0.9362  
0.9541  
0.9716

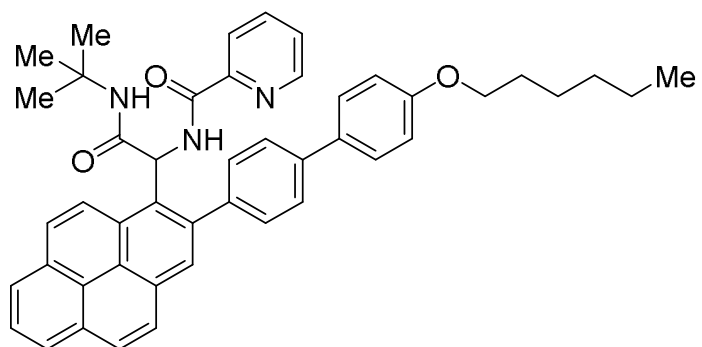

60

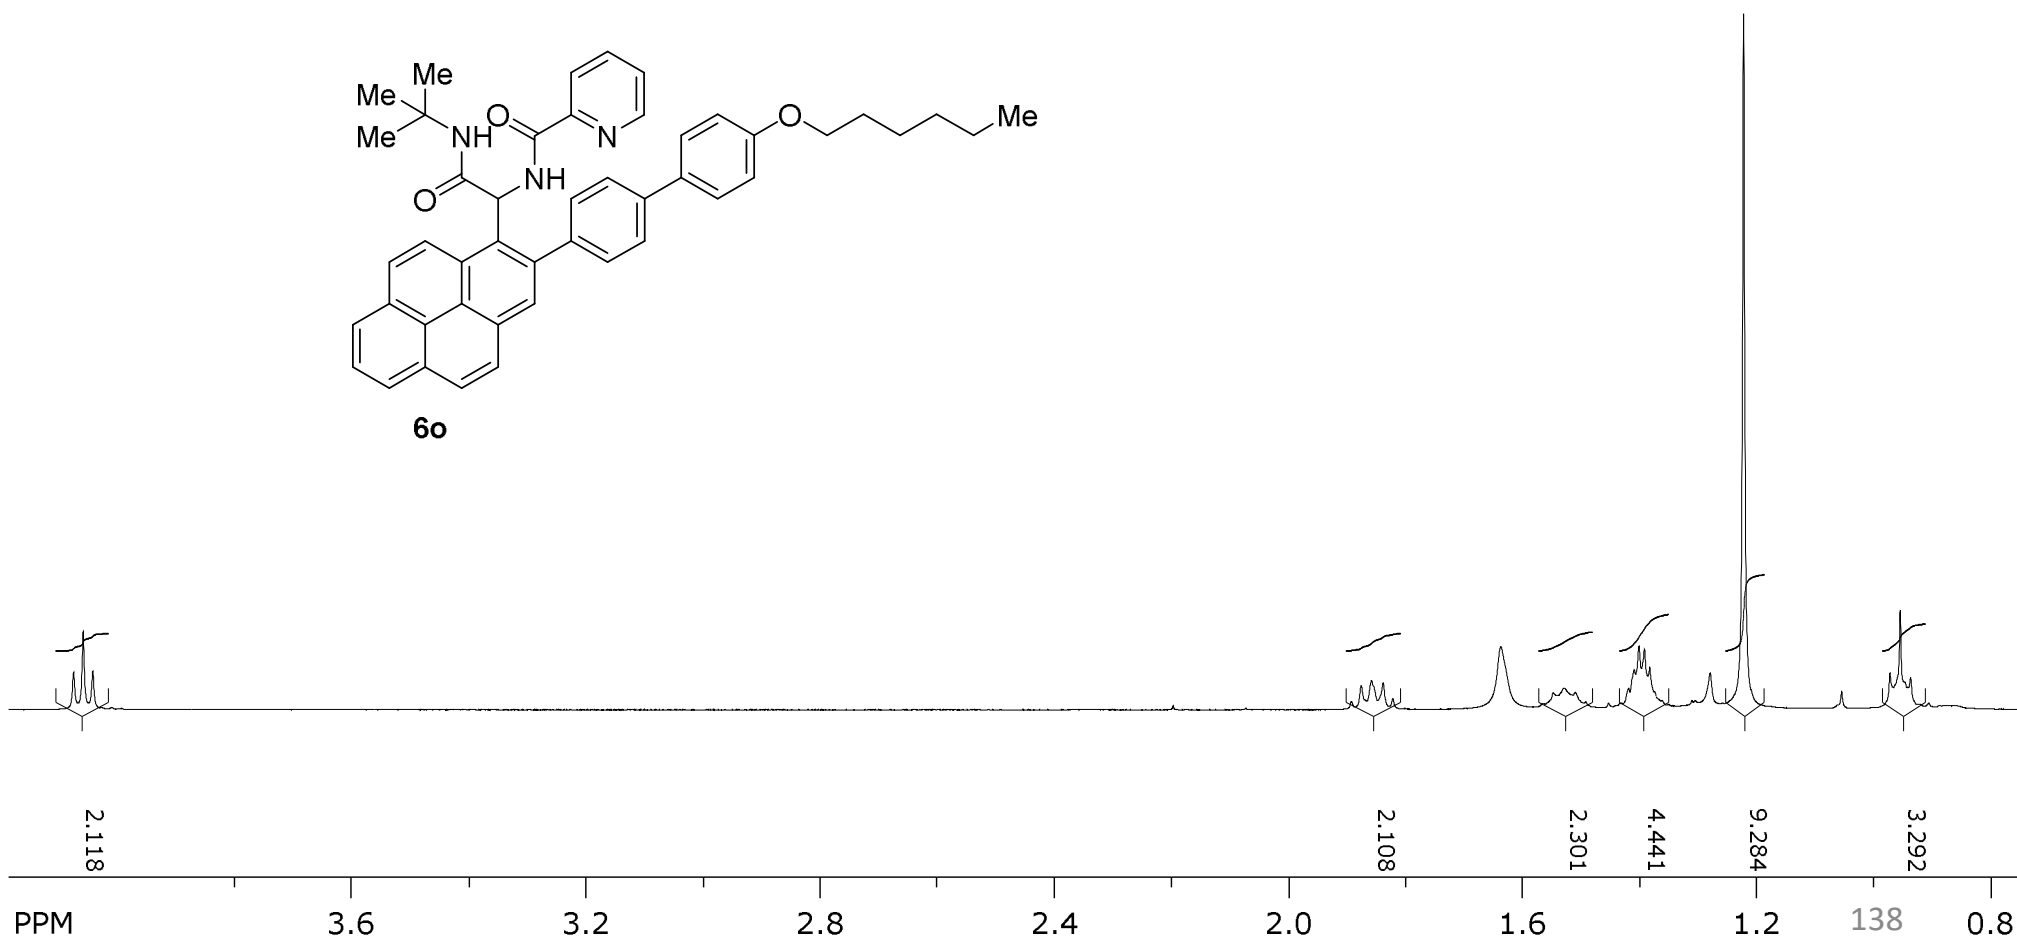

SpinWorks 4: SUB-60  
C13CPD256 CDCl3 /opt/topspin3.5pl2/nmrdata nmrsu 5

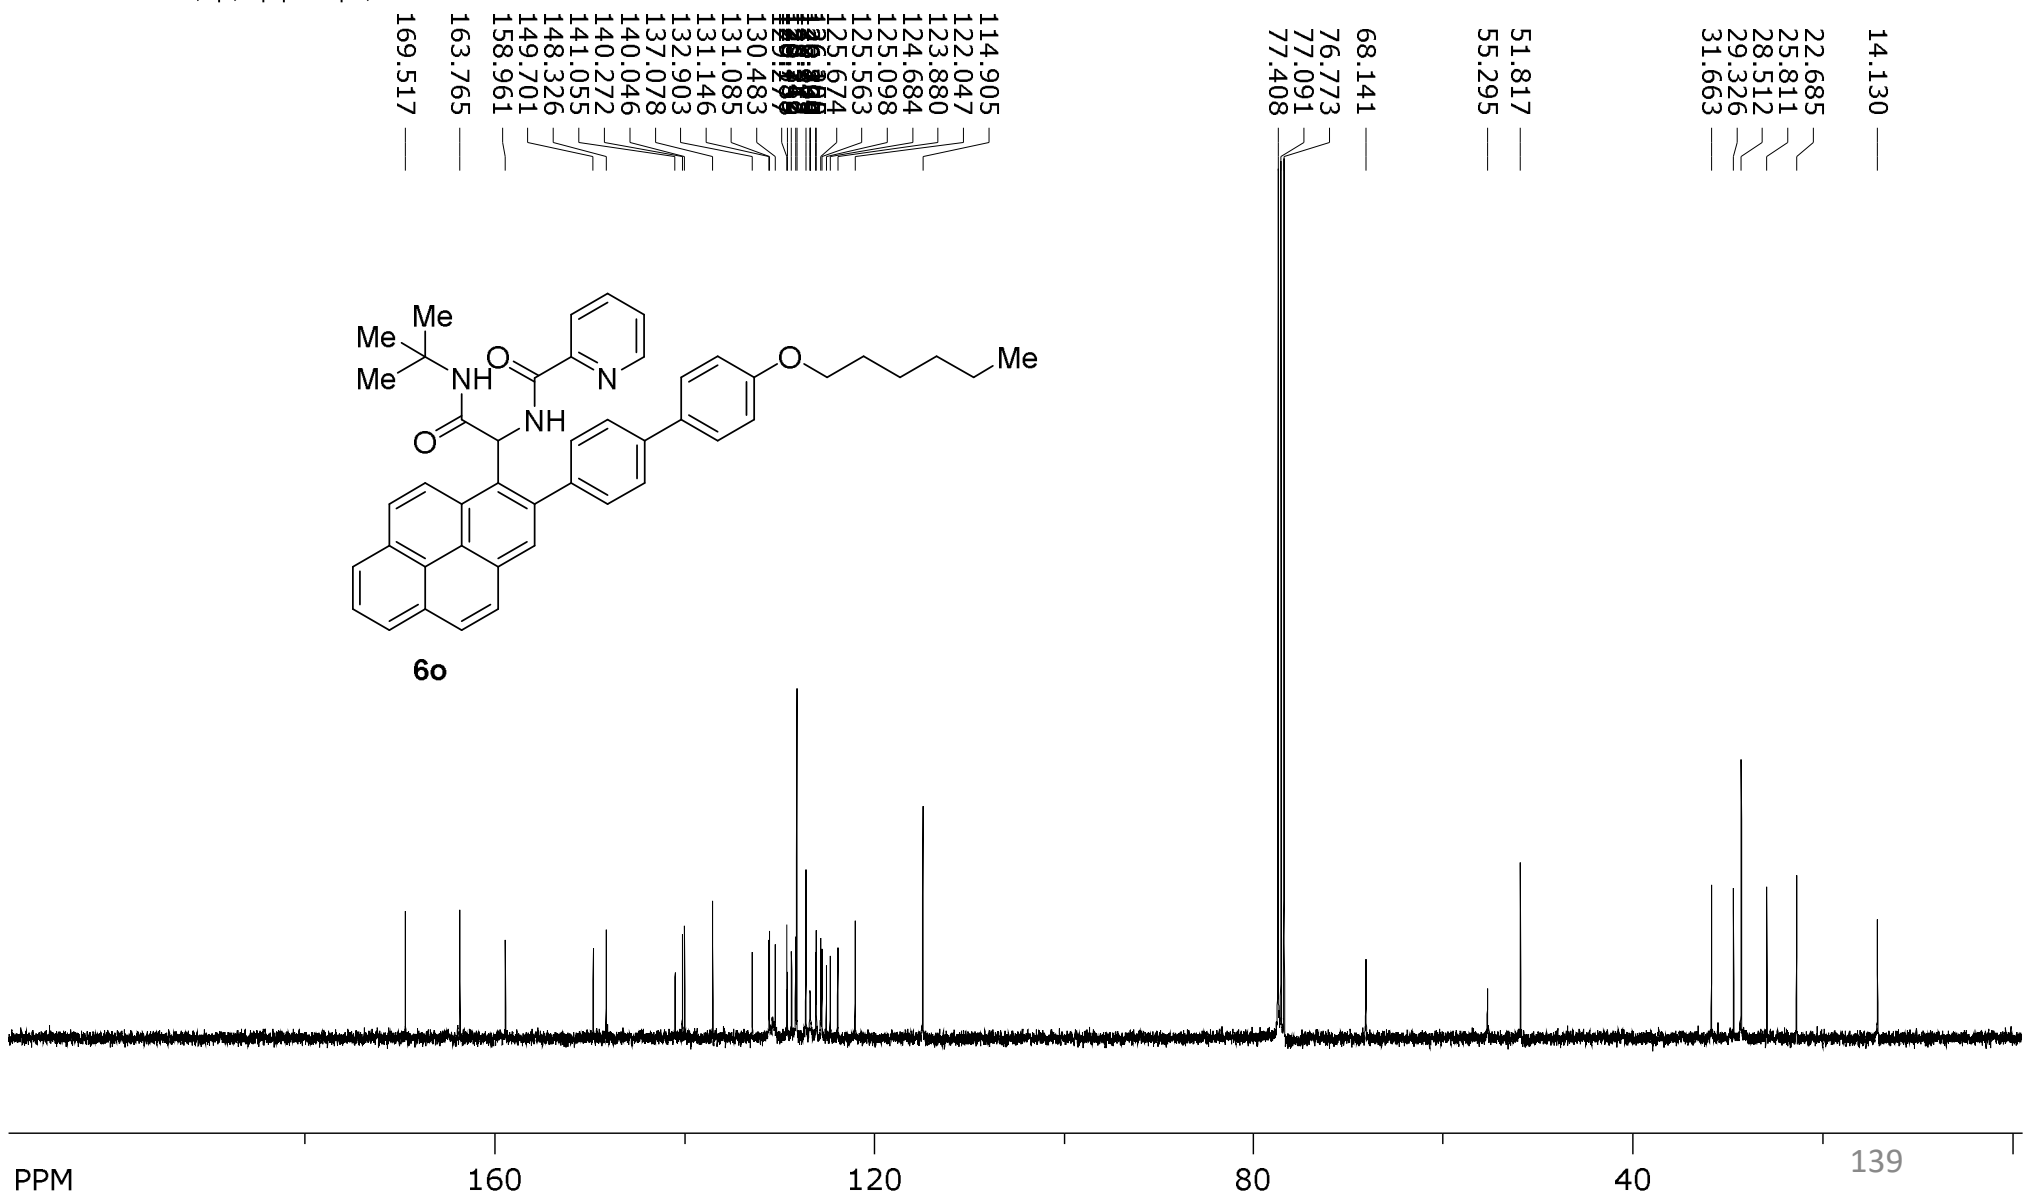

SpinWorks 4: SUB-60  
C13CPD256 CDCl3 /opt/topspin3.5pl2/nmrdata nmrsu 5

149.701

148.326

140.046  
140.272  
141.055

137.078

132.903

131.085

131.146

130.483

129.277

129.188

128.759

128.342

128.212

127.249

126.805

126.794

126.769

126.205

126.150

125.674

125.563

125.098

124.684

123.880

122.047

114.905



6o

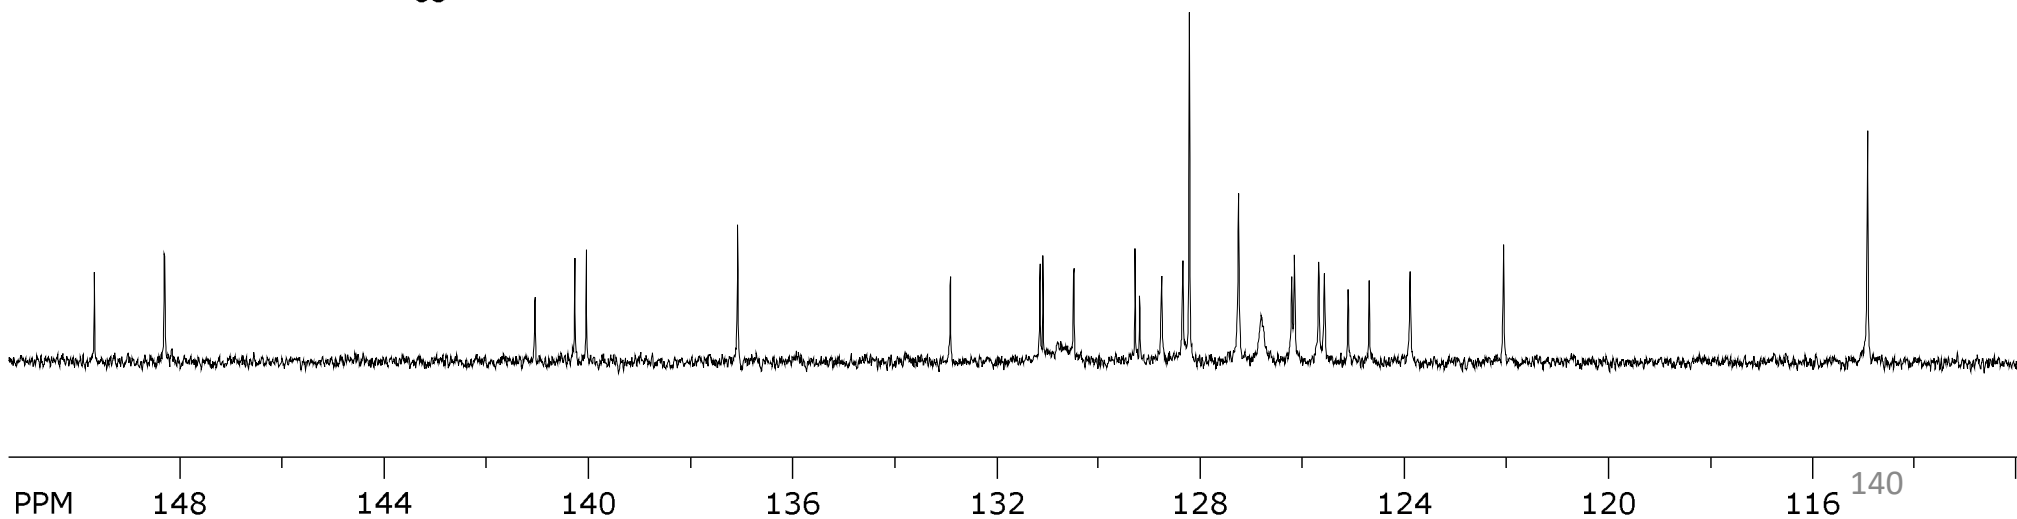

SpinWorks 4: SUB-47 RE  
PROTON CDCl3 /opt/topspin3.5pl2/nmrdata nmrsu 32

6.3997  
6.4138  
7.2836  
7.3456  
7.3647  
7.3740  
7.3768  
7.3808  
7.3988  
7.3988  
7.7988  
7.7988  
8.1933  
8.2007  
8.2084  
8.2171  
8.2273  
8.5532  
8.5767  
8.5875  
9.5674

5.5176

2.5017

1.2283

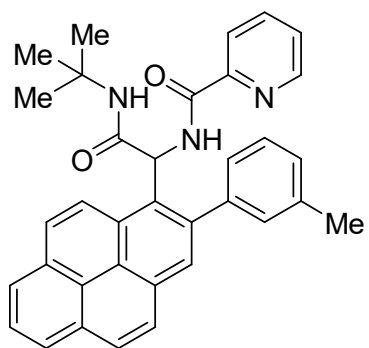

6p

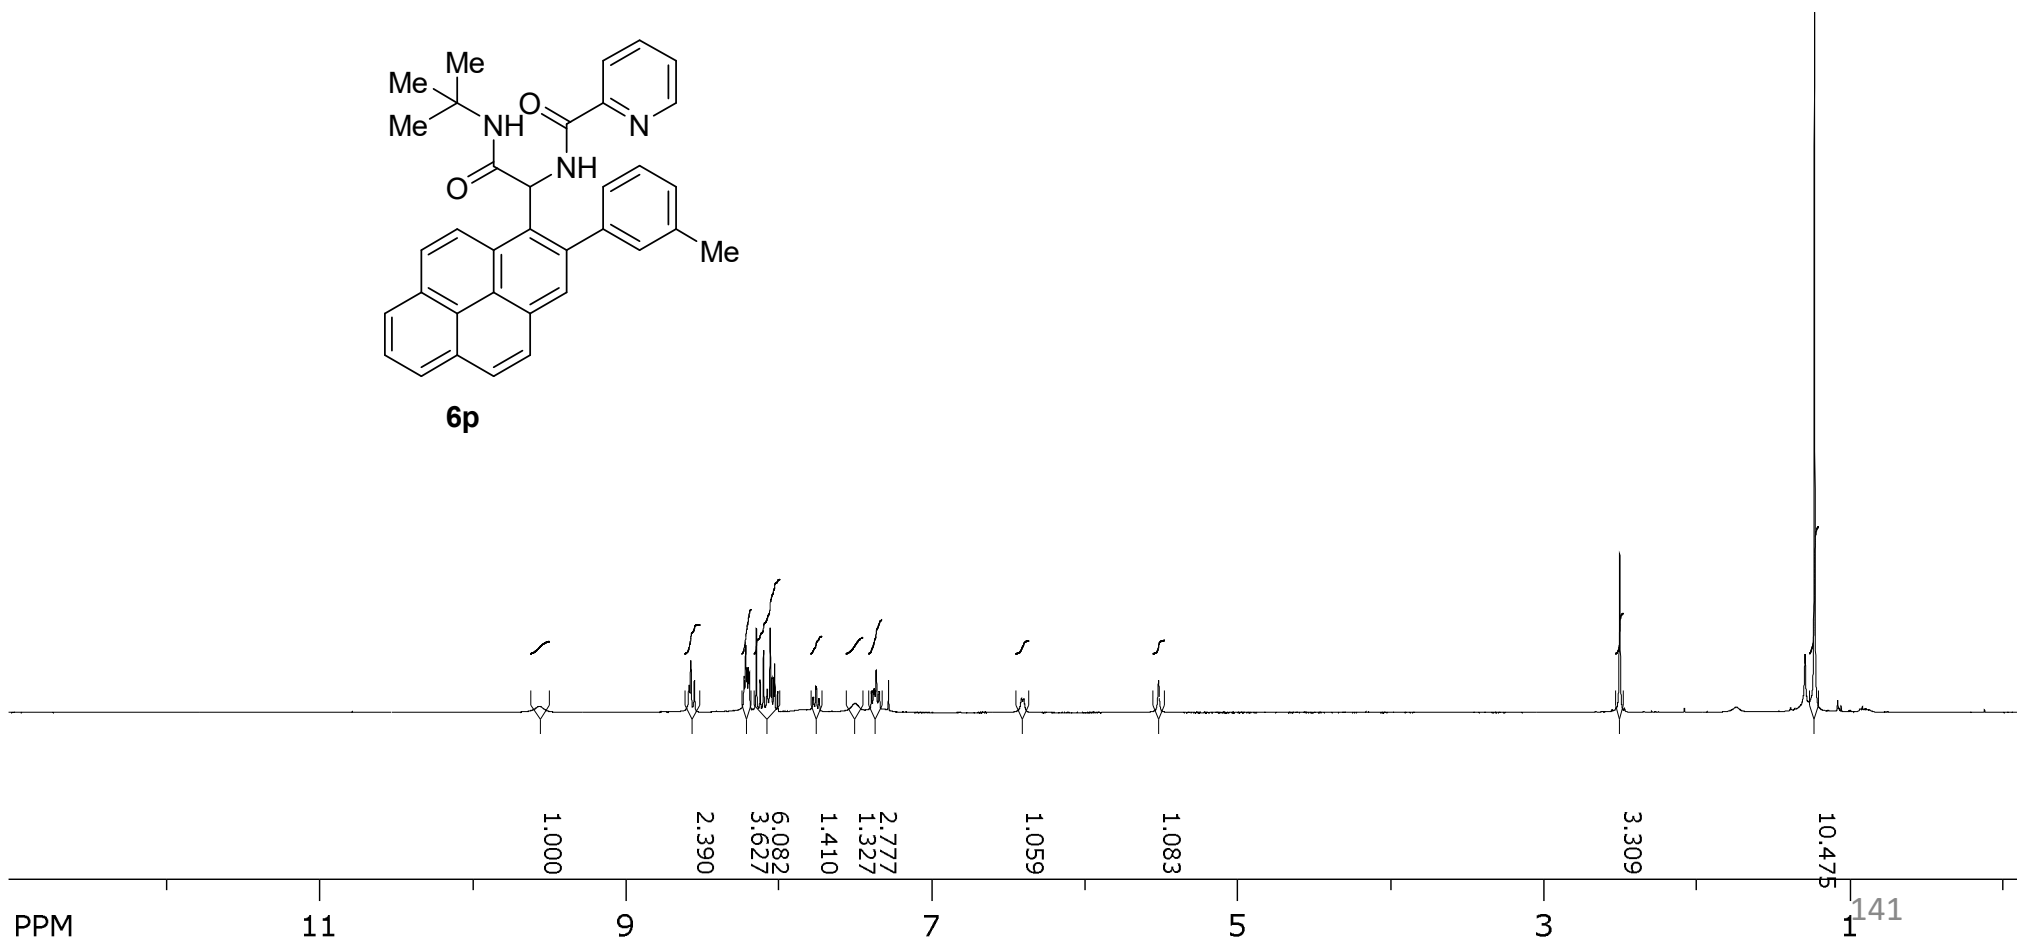

SpinWorks 4: SUB-47 RE  
PROTON CDCl3 /opt/topspin3.5pl2/nmrdata nmrsu 32

8.5532  
8.5767  
8.5875

8.1933  
8.2007  
8.2084  
8.2171  
8.2273

8.1477  
8.1233  
8.1010  
8.0771  
8.0574  
8.0470  
8.0350  
8.0279  
8.0088

7.7356  
7.7396  
7.7550  
7.7589  
7.7741  
7.7781

7.4809  
7.4993  
7.5034

7.2836  
7.3456  
7.3647  
7.3740  
7.3768  
7.3808  
7.3836  
7.3930  
7.3956

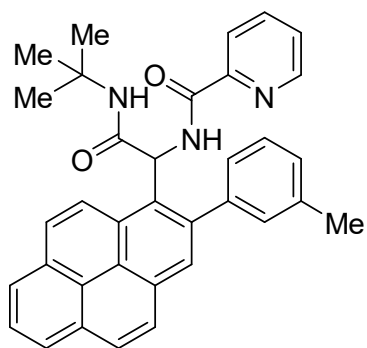

6p

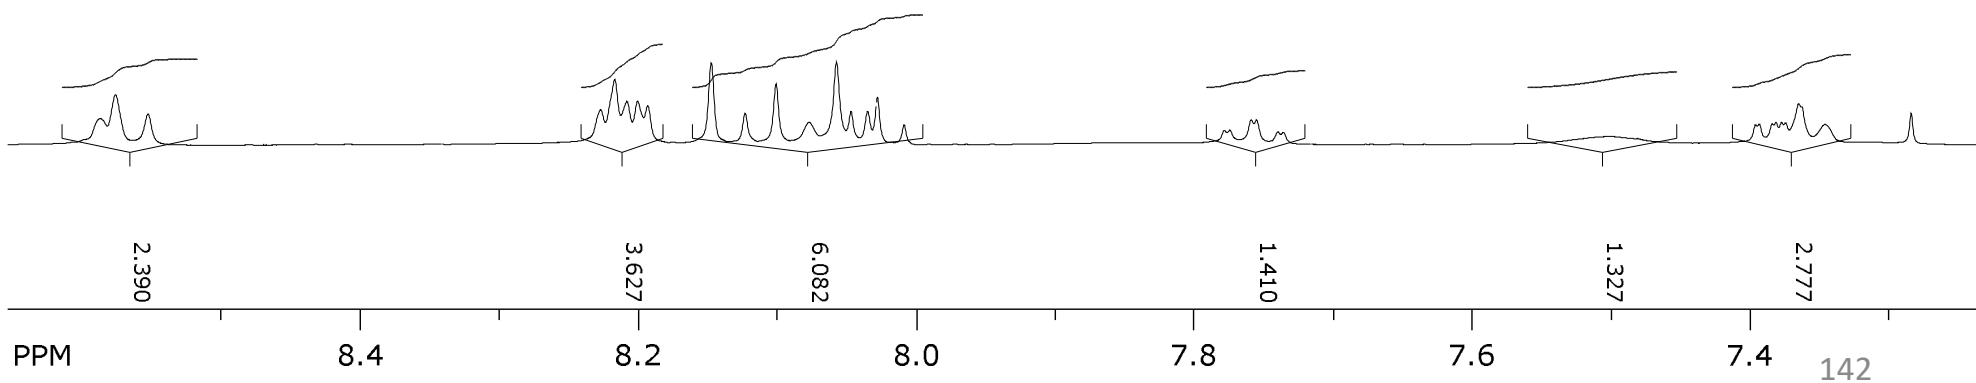



SpinWorks 4: SUB-47 RE  
C13CPD256 CDCl3 /opt/topspin3.5pl2/nmrdata nmrsu 32

149.732 —  
148.293 —  
141.394 —  
141.689 —  
137.068 —  
128.286 —  
128.600 —  
128.716 —  
129.128 —  
129.175 —  
129.233 —  
130.481 —  
130.978 —  
131.136 —  
127.092 —  
127.236 —  
126.160 —  
126.115 —  
125.623 —  
125.516 —  
125.007 —  
124.689 —  
123.888 —  
122.065 —

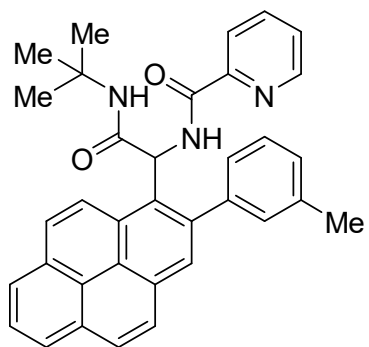

6p

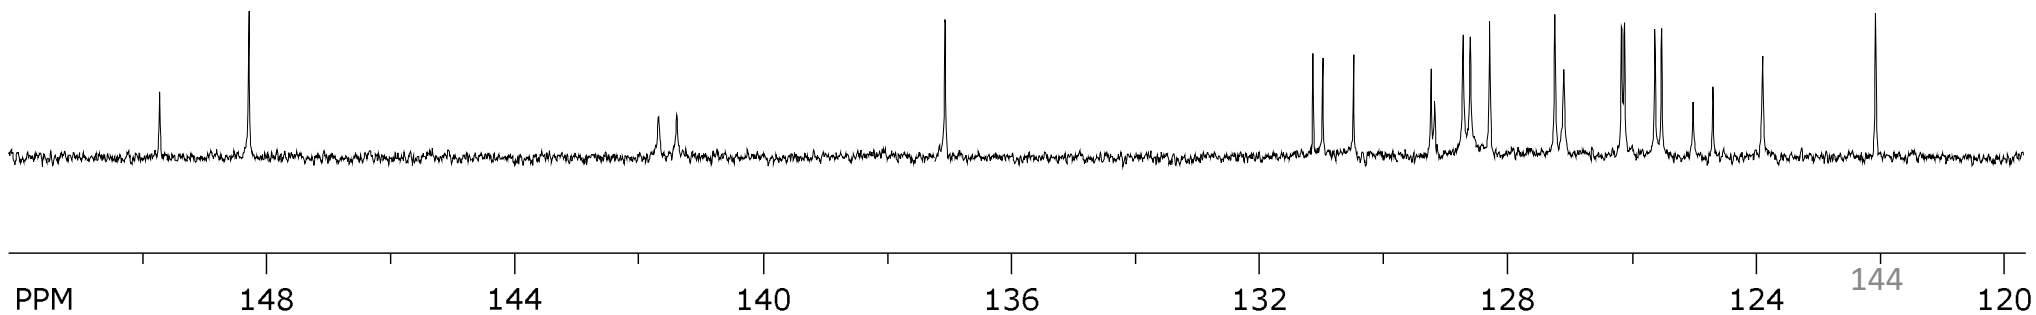



SpinWorks 4: SUB-48RE  
PROTON CDCl3 /opt/topspin3.5pl2/nmrdata nmrsu 18

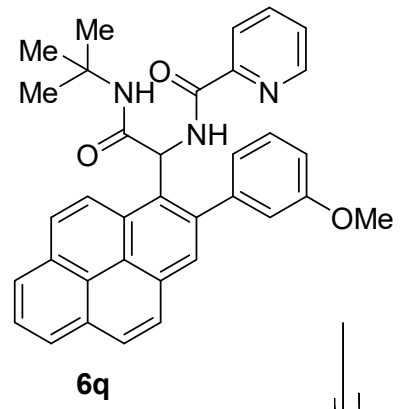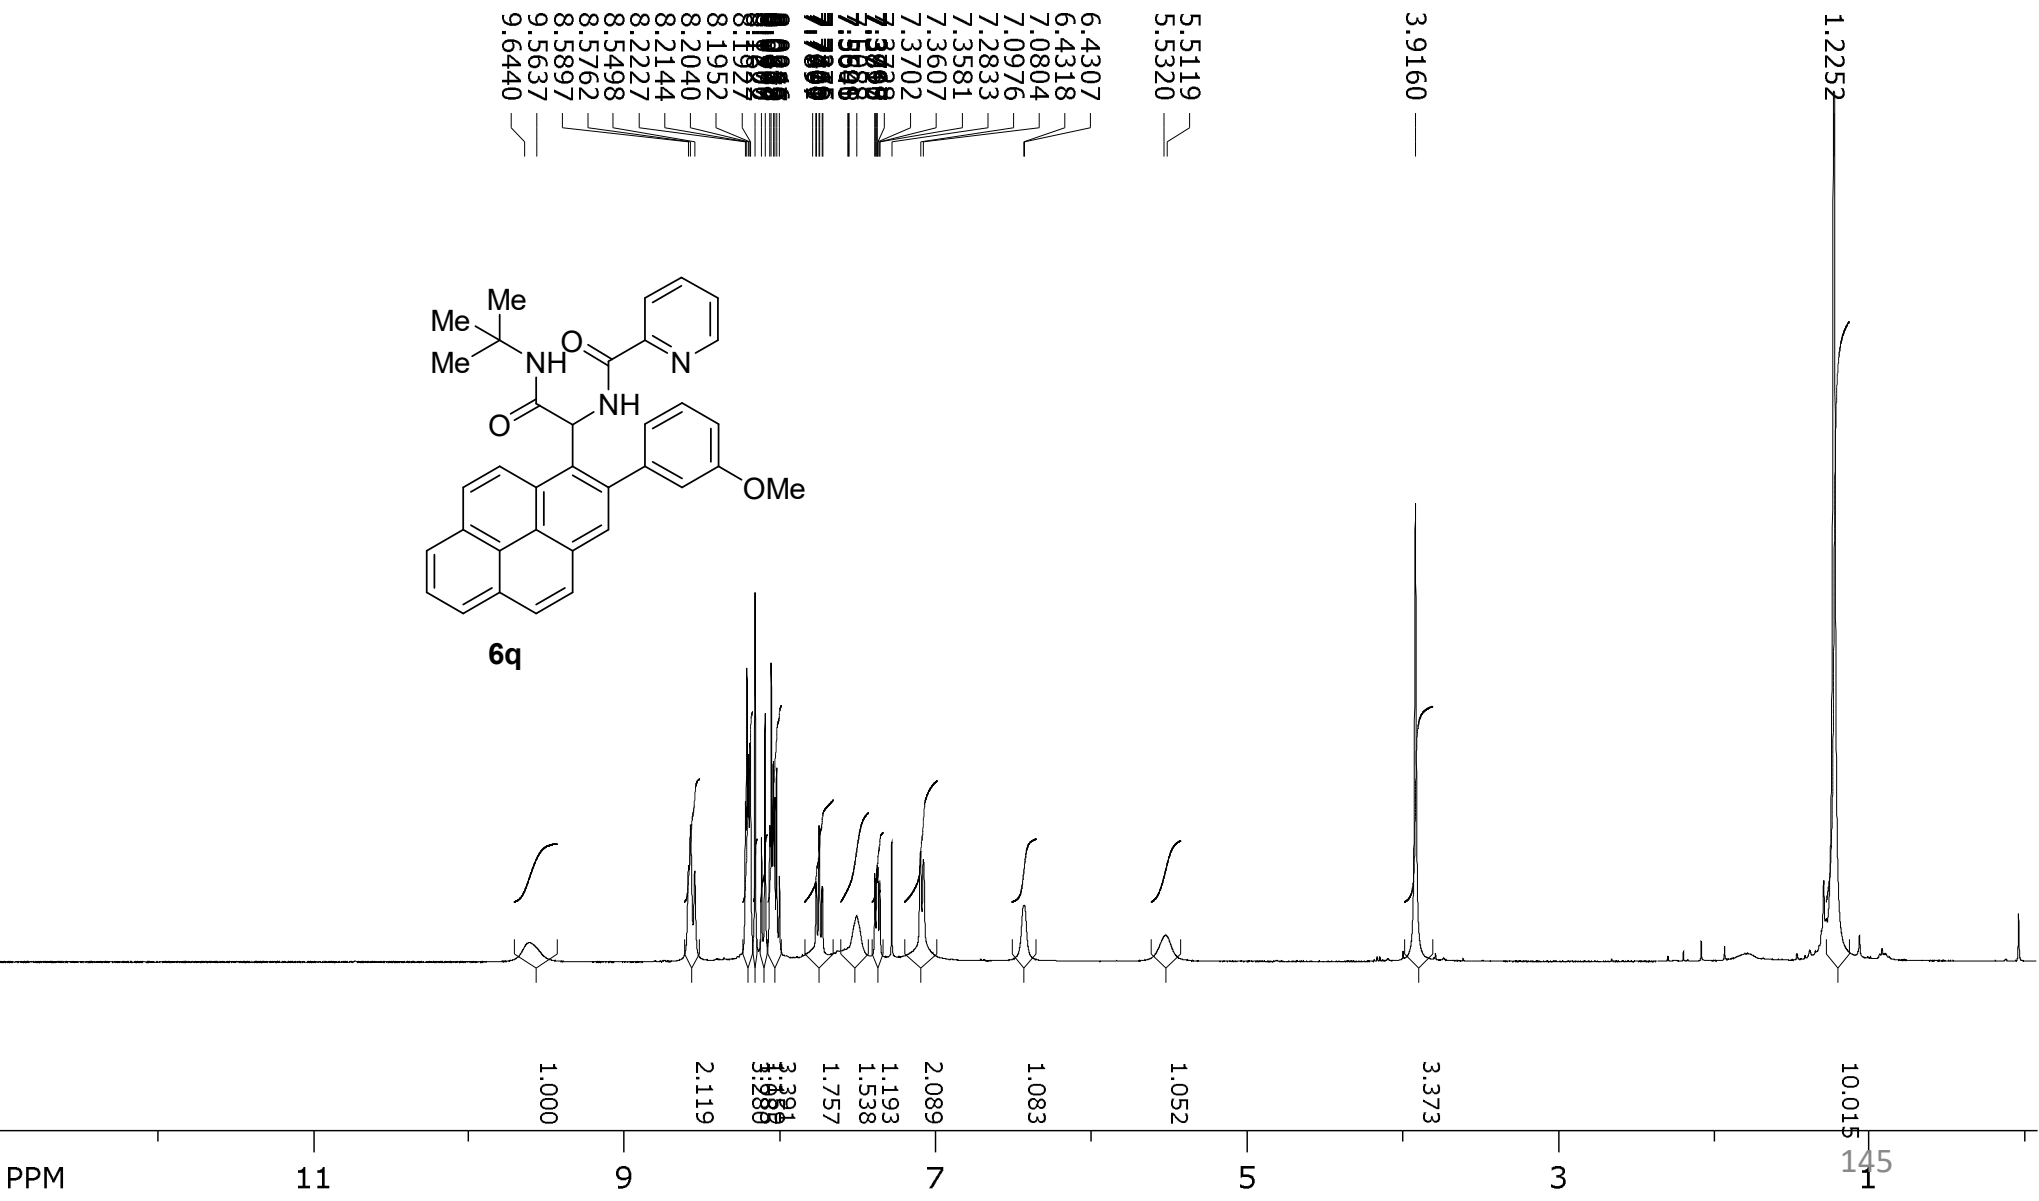

SpinWorks 4: SUB-48RE  
PROTON CDCl3 /opt/topspin3.5pl2/nmrdata nmrsu 18

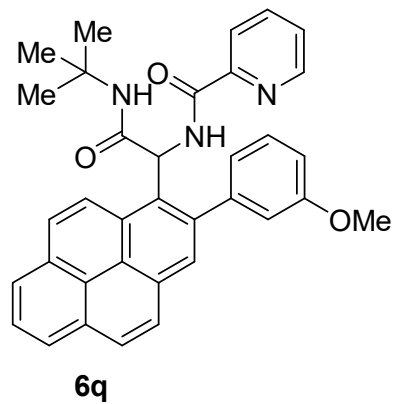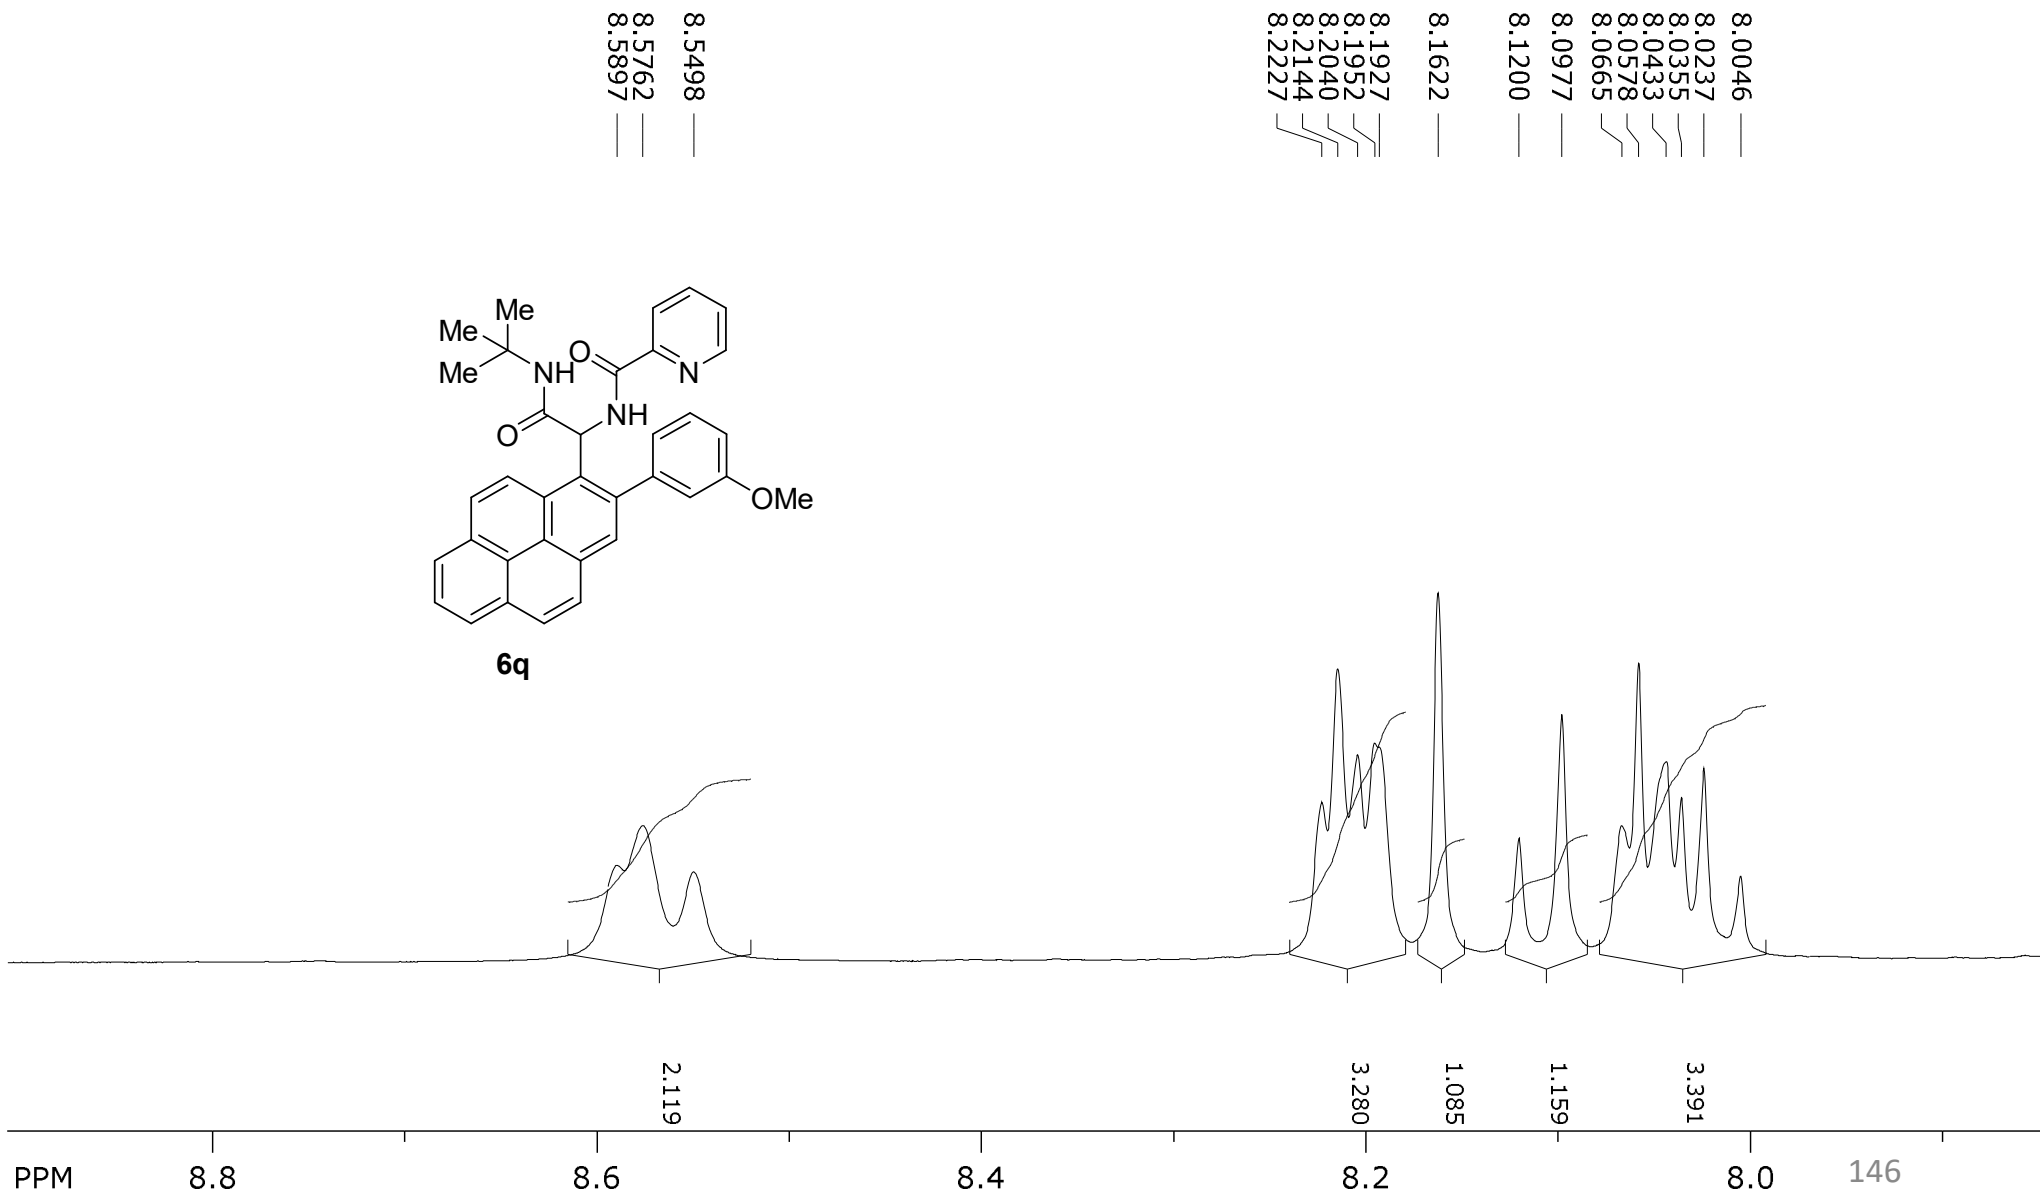

SpinWorks 4: SUB-48RE  
PROTON CDCl3 /opt/topspin3.5pl2/nmrdata nmrsu 18

7.7275  
7.7316  
7.7469  
7.7508  
7.7660  
7.7701  
7.7897

7.5591  
7.5605  
7.5646

7.5088

7.3581  
7.3607  
7.3702  
7.3728  
7.3767  
7.3795  
7.3890  
7.3915

7.2833

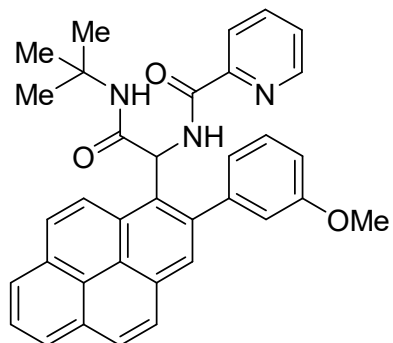

6q

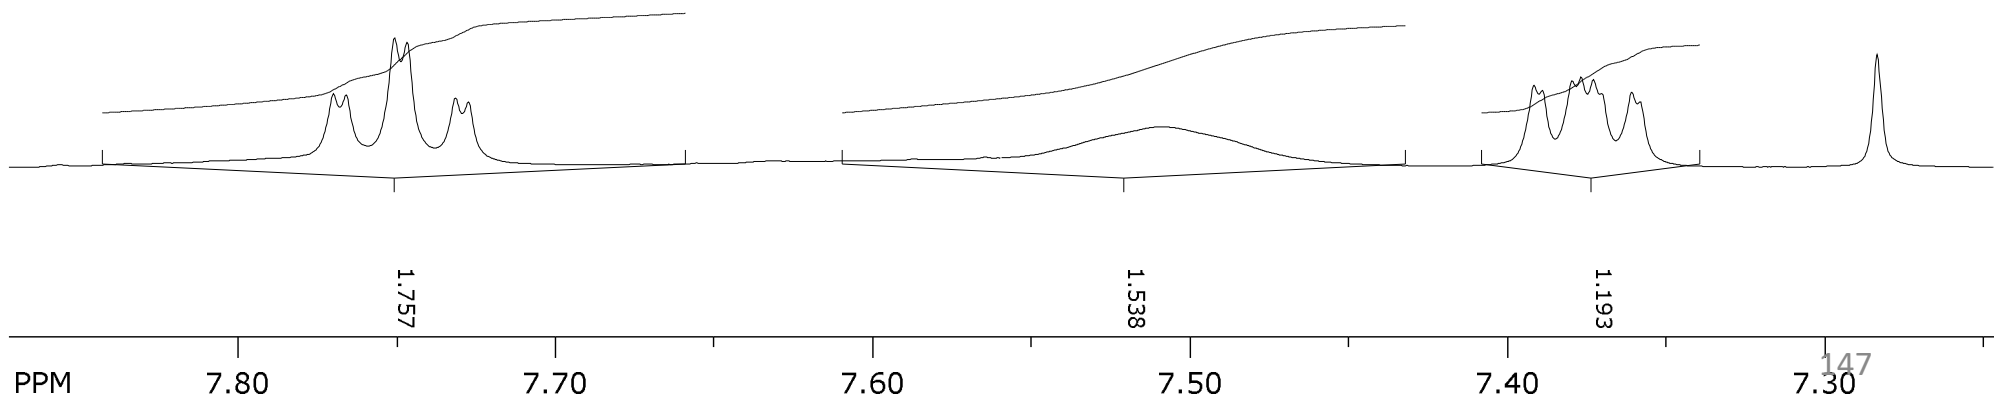

SpinWorks 4: SUB-48RE  
PROTON CDCl3 /opt/topspin3.5pl2/nmrdata nmrsu 18

7.0804  
7.0976

6.4307  
6.4318

5.5119  
5.5320

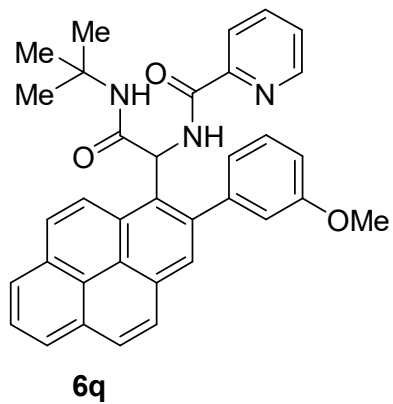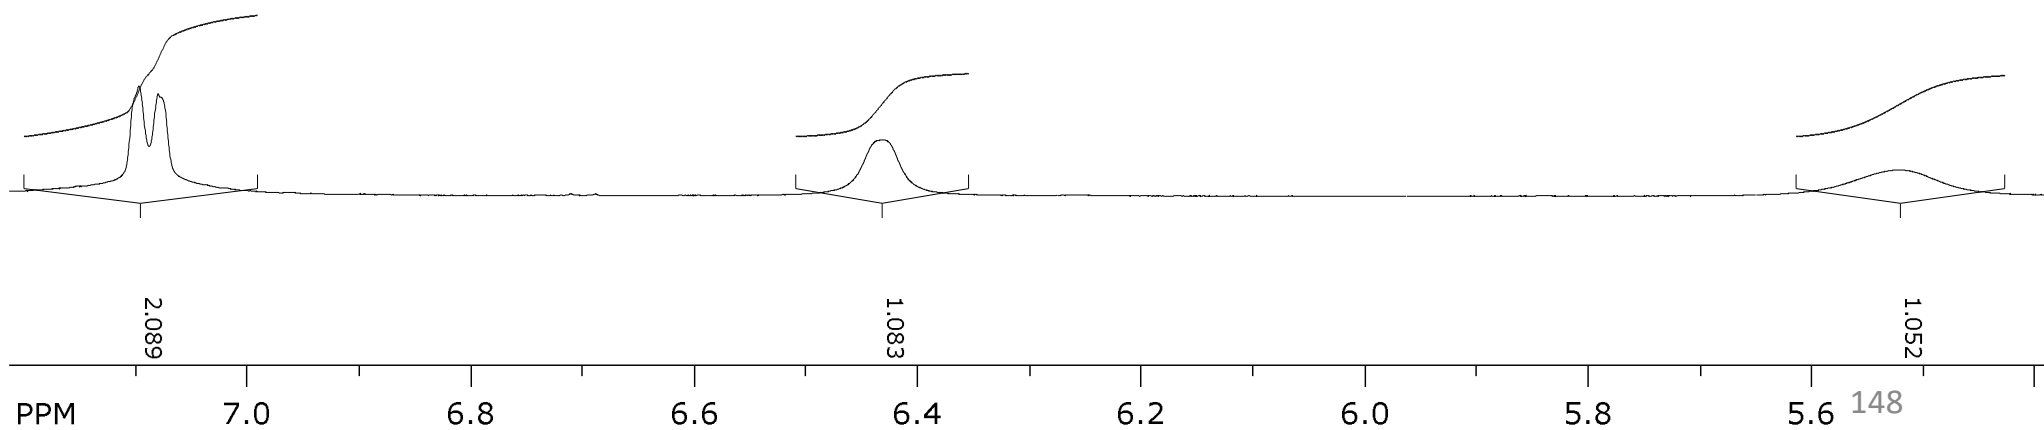

SpinWorks 4: SUB 48 R3  
C13CPD CDCl3 /opt/topspin3.5pl2/nmrdata nmrsu 7

115.801  
122.049  
123.881  
124.665  
125.087  
125.551  
125.596  
125.609  
125.622  
125.635  
125.648  
125.661  
125.674  
125.687  
125.700  
125.713  
125.726  
125.739  
125.752  
125.765  
125.778  
125.791  
125.804  
125.817  
125.830  
125.843  
125.856  
125.869  
125.882  
125.895  
125.908  
125.921  
125.934  
125.947  
125.960  
125.973  
125.986  
125.999  
126.012  
126.025  
126.038  
126.051  
126.064  
126.077  
126.090  
126.103  
126.116  
126.129  
126.142  
126.155  
126.168  
126.181  
126.194  
126.207  
126.220  
126.233  
126.246  
126.259  
126.272  
126.285  
126.298  
126.311  
126.324  
126.337  
126.350  
126.363  
126.376  
126.389  
126.402  
126.415  
126.428  
126.441  
126.454  
126.467  
126.480  
126.493  
126.506  
126.519  
126.532  
126.545  
126.558  
126.571  
126.584  
126.597  
126.610  
126.623  
126.636  
126.649  
126.662  
126.675  
126.688  
126.701  
126.714  
126.727  
126.740  
126.753  
126.766  
126.779  
126.792  
126.805  
126.818  
126.831  
126.844  
126.857  
126.870  
126.883  
126.896  
126.909  
126.922  
126.935  
126.948  
126.961  
126.974  
126.987  
126.999  
127.012  
127.025  
127.038  
127.051  
127.064  
127.077  
127.090  
127.103  
127.116  
127.129  
127.142  
127.155  
127.168  
127.181  
127.194  
127.207  
127.220  
127.233  
127.246  
127.259  
127.272  
127.285  
127.298  
127.311  
127.324  
127.337  
127.350  
127.363  
127.376  
127.389  
127.402  
127.415  
127.428  
127.441  
127.454  
127.467  
127.480  
127.493  
127.506  
127.519  
127.532  
127.545  
127.558  
127.571  
127.584  
127.597  
127.610  
127.623  
127.636  
127.649  
127.662  
127.675  
127.688  
127.701  
127.714  
127.727  
127.740  
127.753  
127.766  
127.779  
127.792  
127.805  
127.818  
127.831  
127.844  
127.857  
127.870  
127.883  
127.896  
127.909  
127.922  
127.935  
127.948  
127.961  
127.974  
127.987  
127.999  
128.012  
128.025  
128.038  
128.051  
128.064  
128.077  
128.090  
128.103  
128.116  
128.129  
128.142  
128.155  
128.168  
128.181  
128.194  
128.207  
128.220  
128.233  
128.246  
128.259  
128.272  
128.285  
128.298  
128.311  
128.324  
128.337  
128.350  
128.363  
128.376  
128.389  
128.402  
128.415  
128.428  
128.441  
128.454  
128.467  
128.480  
128.493  
128.506  
128.519  
128.532  
128.545  
128.558  
128.571  
128.584  
128.597  
128.610  
128.623  
128.636  
128.649  
128.662  
128.675  
128.688  
128.701  
128.714  
128.727  
128.740  
128.753  
128.766  
128.779  
128.792  
128.805  
128.818  
128.831  
128.844  
128.857  
128.870  
128.883  
128.896  
128.909  
128.922  
128.935  
128.948  
128.961  
128.974  
128.987  
128.999  
129.012  
129.025  
129.038  
129.051  
129.064  
129.077  
129.090  
129.103  
129.116  
129.129  
129.142  
129.155  
129.168  
129.181  
129.194  
129.207  
129.220  
129.233  
129.246  
129.259  
129.272  
129.285  
129.298  
129.311  
129.324  
129.337  
129.350  
129.363  
129.376  
129.389  
129.402  
129.415  
129.428  
129.441  
129.454  
129.467  
129.480  
129.493  
129.506  
129.519  
129.532  
129.545  
129.558  
129.571  
129.584  
129.597  
129.610  
129.623  
129.636  
129.649  
129.662  
129.675  
129.688  
129.701  
129.714  
129.727  
129.740  
129.753  
129.766  
129.779  
129.792  
129.805  
129.818  
129.831  
129.844  
129.857  
129.870  
129.883  
129.896  
129.909  
129.922  
129.935  
129.948  
129.961  
129.974  
129.987  
129.999  
130.012  
130.025  
130.038  
130.051  
130.064  
130.077  
130.090  
130.103  
130.116  
130.129  
130.142  
130.155  
130.168  
130.181  
130.194  
130.207  
130.220  
130.233  
130.246  
130.259  
130.272  
130.285  
130.298  
130.311  
130.324  
130.337  
130.350  
130.363  
130.376  
130.389  
130.402  
130.415  
130.428  
130.441  
130.454  
130.467  
130.480  
130.493  
130.506  
130.519  
130.532  
130.545  
130.558  
130.571  
130.584  
130.597  
130.610  
130.623  
130.636  
130.649  
130.662  
130.675  
130.688  
130.701  
130.714  
130.727  
130.740  
130.753  
130.766  
130.779  
130.792  
130.805  
130.818  
130.831  
130.844  
130.857  
130.870  
130.883  
130.896  
130.909  
130.922  
130.935  
130.948  
130.961  
130.974  
130.987  
130.999  
131.012  
131.025  
131.038  
131.051  
131.064  
131.077  
131.090  
131.103  
131.116  
131.129  
131.142  
131.155  
131.168  
131.181  
131.194  
131.207  
131.220  
131.233  
131.246  
131.259  
131.272  
131.285  
131.298  
131.311  
131.324  
131.337  
131.350  
131.363  
131.376  
131.389  
131.402  
131.415  
131.428  
131.441  
131.454  
131.467  
131.480  
131.493  
131.506  
131.519  
131.532  
131.545  
131.558  
131.571  
131.584  
131.597  
131.610  
131.623  
131.636  
131.649  
131.662  
131.675  
131.688  
131.701  
131.714  
131.727  
131.740  
131.753  
131.766  
131.779  
131.792  
131.805  
131.818  
131.831  
131.844  
131.857  
131.870  
131.883  
131.896  
131.909  
131.922  
131.935  
131.948  
131.961  
131.974  
131.987  
131.999  
132.012  
132.025  
132.038  
132.051  
132.064  
132.077  
132.090  
132.103  
132.116  
132.129  
132.142  
132.155  
132.168  
132.181  
132.194  
132.207  
132.220  
132.233  
132.246  
132.259  
132.272  
132.285  
132.298  
132.311  
132.324  
132.337  
132.350  
132.363  
132.376  
132.389  
132.402  
132.415  
132.428  
132.441  
132.454  
132.467  
132.480  
132.493  
132.506  
132.519  
132.532  
132.545  
132.558  
132.571  
132.584  
132.597  
132.610  
132.623  
132.636  
132.649  
132.662  
132.675  
132.688  
132.701  
132.714  
132.727  
132.740  
132.753  
132.766  
132.779  
132.792  
132.805  
132.818  
132.831  
132.844  
132.857  
132.870  
132.883  
132.896  
132.909  
132.922  
132.935  
132.948  
132.961  
132.974  
132.987  
132.999  
133.012  
133.025  
133.038  
133.051  
133.064  
133.077  
133.090  
133.103  
133.116  
133.129  
133.142  
133.155  
133.168  
133.181  
133.194  
133.207  
133.220  
133.233  
133.246  
133.259  
133.272  
133.285  
133.298  
133.311  
133.324  
133.337  
133.350  
133.363  
133.376  
133.389  
133.402  
133.415  
133.428  
133.441  
133.454  
133.467  
133.480  
133.493  
133.506  
133.519  
133.532  
133.545  
133.558  
133.571  
133.584  
133.597  
133.610  
133.623  
133.636  
133.649  
133.662  
133.675  
133.688  
133.701  
133.714  
133.727  
133.740  
133.753  
133.766  
133.779  
133.792  
133.805  
133.818  
133.831  
133.844  
133.857  
133.870  
133.883  
133.896  
133.909  
133.922  
133.935  
133.948  
133.961  
133.974  
133.987  
133.999  
134.012  
134.025  
134.038  
134.051  
134.064  
134.077  
134.090  
134.103  
134.116  
134.129  
134.142  
134.155  
134.168  
134.181  
134.194  
134.207  
134.220  
134.233  
134.246  
134.259  
134.272  
134.285  
134.298  
134.311  
134.324  
134.337  
134.350  
134.363  
134.376  
134.389  
134.402  
134.415  
134.428  
134.441  
134.454  
134.467  
134.480  
134.493  
134.506  
134.519  
134.532  
134.545  
134.558  
134.571  
134.584  
134.597  
134.610  
134.623  
134.636  
134.649  
134.662  
134.675  
134.688  
134.701  
134.714  
134.727  
134.740  
134.753  
134.766  
134.779  
134.792  
134.805  
134.818  
134.831  
134.844  
134.857  
134.870  
134.883  
134.896  
134.909  
134.922  
134.935  
134.948  
134.961  
134.974  
134.987  
134.999  
135.012  
135.025  
135.038  
135.051  
135.064  
135.077  
135.090  
135.103  
135.116  
135.129  
135.142  
135.155  
135.168  
135.181  
135.194  
135.207  
135.220  
135.233  
135.246  
135.259  
135.272  
135.285  
135.298  
135.311  
135.324  
135.337  
135.350  
135.363  
135.376  
135.389  
135.402  
135.415  
135.428  
135.441  
135.454  
135.467  
135.480  
135.493  
135.506  
135.519  
135.532  
135.545  
135.558  
135.571  
135.584  
135.597  
135.610  
135.623  
135.636  
135.649  
135.662  
135.675  
135.688  
135.701  
135.714  
135.727  
135.740  
135.753  
135.766  
135.779  
135.792  
135.805  
135.818  
135.831  
135.844  
135.857  
135.870  
135.883  
135.896  
135.909  
135.922  
135.935  
135.948  
135.961  
135.974  
135.987  
135.999  
136.012  
136.025  
136.038  
136.051  
136.064  
136.077  
136.090  
136.103  
136.116  
136.129  
136.142  
136.155  
136.168  
136.181  
136.194  
136.207  
136.220  
136.233  
136.246  
136.259  
136.272  
136.285  
136.298  
136.311  
136.324  
136.337  
136.350  
136.363  
136.376  
136.389  
136.402  
136.415  
136.428  
136.441  
136.454  
136.467  
136.480  
136.493  
136.506  
136.519  
136.532  
136.545  
136.558  
136.571  
136.584  
136.597  
136.610  
136.623  
136.636  
136.649  
136.662  
136.675  
136.688  
136.701  
136.714  
136.727  
136.740  
136.753  
136.766  
136.779  
136.792  
136.805  
136.818  
136.831  
136.844  
136.857  
136.870  
136.883  
136.896  
136.909  
136.922  
136.935  
136.948  
136.961  
136.974  
136.987  
136.999  
137.012  
137.025  
137.038  
137.051  
137.064  
137.077  
137.090  
137.103  
137.116  
137.129  
137.142  
137.155  
137.168  
137.181  
137.194  
137.207  
137.220  
137.233  
137.246  
137.259  
137.272  
137.285  
137.298  
137.311  
137.324  
137.337  
137.350  
137.363  
137.376  
137.389  
137.402  
137.415  
137.428  
137.441  
137.454  
137.467  
137.480  
137.493  
137.506  
137.519  
137.532  
137.545  
137.558  
137.571  
137.584  
137.597  
137.610  
137.623  
137.636  
137.649  
137.662  
137.675  
137.688  
137.701  
137.714  
137.727  
137.740  
137.753  
137.766  
137.779  
137.792  
137.805  
137.818  
137.831  
137.844  
137.857  
137.870  
137.883  
137.896  
137.909  
137.922  
137.935  
137.948  
137.961  
137.974  
137.987  
137.999  
138.012  
138.025  
138.038  
138.051  
138.064  
138.077  
138.090  
138.103  
138.116  
138.129  
138.142  
138.155  
138.168  
138.181  
138.194  
138.207  
138.220  
138.233  
138.246  
138.259  
138.272  
138.285  
138.298  
138.311  
138.324  
138.337  
138.350  
138.363  
138.376  
138.389  
138.402  
138.415  
138.428  
138.441  
138.454  
138.467  
138.480  
138.493  
138.506  
138.519  
138.532  
138.545  
138.558  
138.571  
138.584  
138.597  
138.610  
138.623  
138.636  
138.649  
138.662  
138.675  
138.688  
138.701  
138.714  
138.727  
138.740  
138.753  
138.766  
138.779  
138.792  
138.805  
138.818  
138.831  
138.844  
138.857  
138.870  
138.883  
138.896  
138.909  
138.922  
138.935  
138.948  
138.961  
138.974  
138.987  
138.999  
139.012  
139.025  
139.038  
139.051  
139.064  
139.077  
139.090  
139.103  
139.116  
139.129  
139.142  
139.155  
139.168  
139.181  
139.194  
139.207  
139.220  
139.233  
139.246  
139.259  
139.272  
139.285  
139.298  
139.311  
139.324  
139.337  
139.350  
139.363  
139.376  
139.389  
139.402  
139.415  
139.428  
139.441  
139.454  
139.467  
139.480  
139.493  
139.506  
139.519  
139.532  
139.545  
139.558  
139.571  
139.584  
139.597  
139.610  
139.623  
139.636  
139.649  
139.662  
139.675  
139.688  
139.701  
139.714  
139.727  
139.740  
139.753  
139.766  
139.779  
139.792  
139.805  
139.818  
139.831  
139.844  
139.857  
139.870  
139.883  
139.896  
139.909  
139.922  
139.935  
139.948  
139.961  
139.974  
139.987  
139.999  
140.012  
140.025  
140.038  
140.051  
140.064  
140.077  
140.090  
140.103  
140.116  
140.129  
140.142  
140.155  
140.168  
140.181  
140.194  
140.207  
140.220  
140.233  
140.246  
140.259  
140.272  
140.285  
140.298  
140.311  
140.324  
140.337  
140.350  
140.363  
140.376  
140.389  
140.402  
140.415  
140.428  
140.441  
140.454  
140.467  
140.480  
140.493  
140.506  
140.519  
140.532  
140.545  
140.558  
140.571  
140.584  
140.597  
140.610  
140.623  
140.636  
140.649  
140.662  
140.675  
140.688  
140.701  
140.714  
140.727  
140.740  
140.753  
140.766  
140.779  
140.792  
140.805  
140.818  
140.831  
140.844  
140.857  
140.870  
140.883  
140.896  
140.909  
140.922  
140.935  
140.948  
140.961  
140.974  
140.987  
140.999  
141.012  
141.025  
141.038  
141.051  
141.064  
141.077  
141.090  
141.103  
141.116  
141.129  
141.142  
141.155  
141.168  
141.181  
141.194  
141.207  
141.220  
141.233  
141.246  
141.259  
141.272  
141.285  
141.298  
141.311  
141.324  
141.337  
141.350  
141.363  
141.376  
141.389  
141.402  
141.415  
141.428  
141.441  
141.454  
141.467  
141.480  
141.493  
141.506  
141.519  
141.532  
141.545  
141.558  
141.571  
141.584  
141.597  
141.610  
141.623  
141.636  
141.649  
141.662  
141.675  
141.688  
141.701  
141.714  
141.727  
141.740  
141.753  
141.766  
141.779  
141.792  
141.805  
141.818  
141.831  
141.844  
141.857  
141.870  
141.883  
141.896  
141.909  
141.922  
141.935  
141.948  
141.961  
141.974  
141.987  
141.999  
142.012  
142.025  
142.038  
142.051  
142.064  
142.077  
142.090  
142.103  
142.116  
142.129  
142.142  
142.155  
142.168  
142.181  
142.194  
142.207  
142.220  
142.233  
142.246  
142.259  
142.272  
142.285  
142.298  
142.311  
142.324  
142.337  
142.350  
142.363  
142.376  
142.389  
142.402  
142.415  
142.428  
142.441  
142.454  
142.467  
142.480  
142.493  
142.506  
142.519  
142.532  
142.545  
142.558  
142.571  
142.584  
142.597  
142.610  
142.623  
142.636  
142.649  
142.662  
142.675  
142.688  
142.701  
142.714  
142.727  
142.740  
142.753  
142.766  
142.779  
142.792  
142.805  
142.818  
142.831  
142.844  
142.857  
142.870  
142.883  
142.896  
142.909  
142.922  
142.935  
142.948  
142.961  
142.974  
142.987  
142.999  
143.012  
143.025  
143.038  
143.051  
143.064  
143.077  
143.090  
143.103  
143.116  
143.129  
143.142  
143.155  
143.168  
143.181  
143.194  
143.207  
143.220  
143.23

SpinWorks 4: SUB 48 R3  
C13CPD CDCl3 /opt/topspin3.5pl2/nmrdata nmrsu 7

149.726 —  
148.313 —  
143.131 —  
141.060 —  
137.070 —  
122.049 —  
123.881 —  
124.665 —  
125.087 —  
125.551 —  
125.596 —  
125.655 —  
126.131 —  
126.199 —  
126.928 —  
127.225 —  
128.329 —  
128.747 —  
128.801 —  
129.153 —  
129.210 —  
129.726 —  
130.485 —  
130.998 —  
131.142 —  
115.801 —

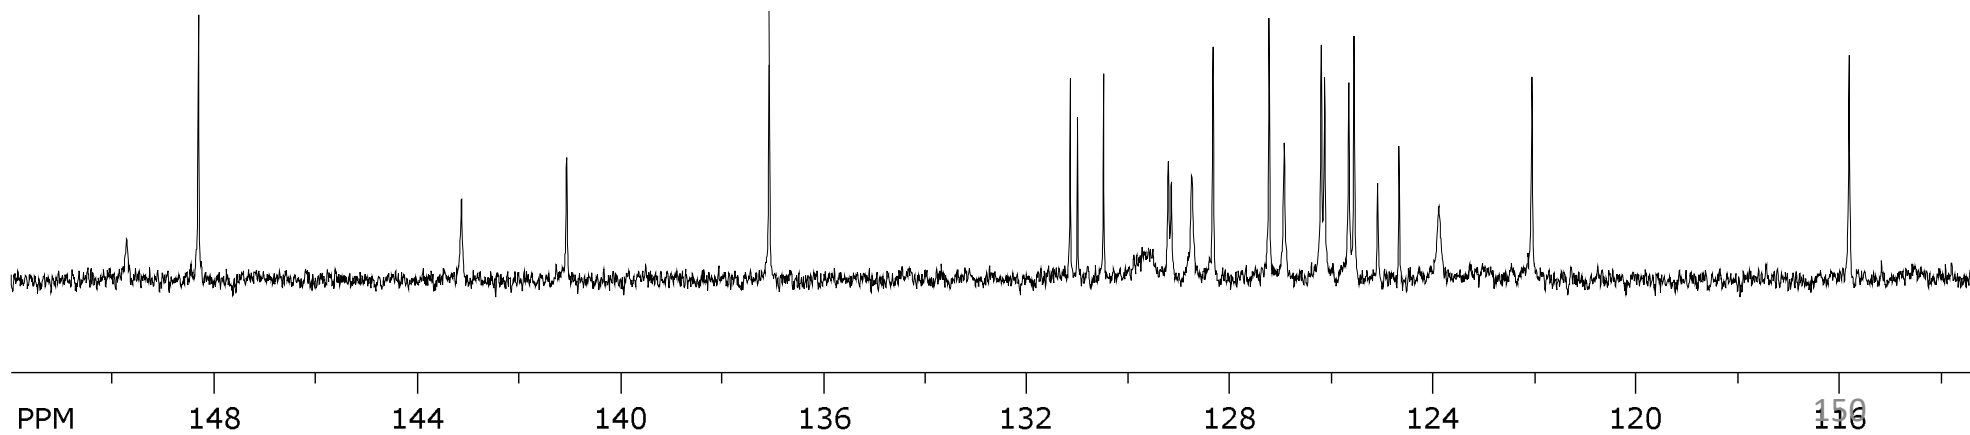

SpinWorks 4: AD 2136 RE  
PROTON CDCl3 /opt/topspin3.5pl2/nmrdata nmrsu 7

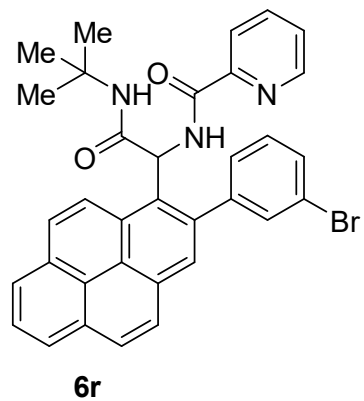

5.4678  
6.3086  
6.3114  
6.3137  
6.3157  
6.3179  
6.3190  
7.2838  
7.3725  
7.3753  
7.9815  
7.9845  
7.9875  
8.2294  
8.2415  
8.5075  
8.5310  
8.5859  
8.5870  
8.5887  
9.4376  
9.5501

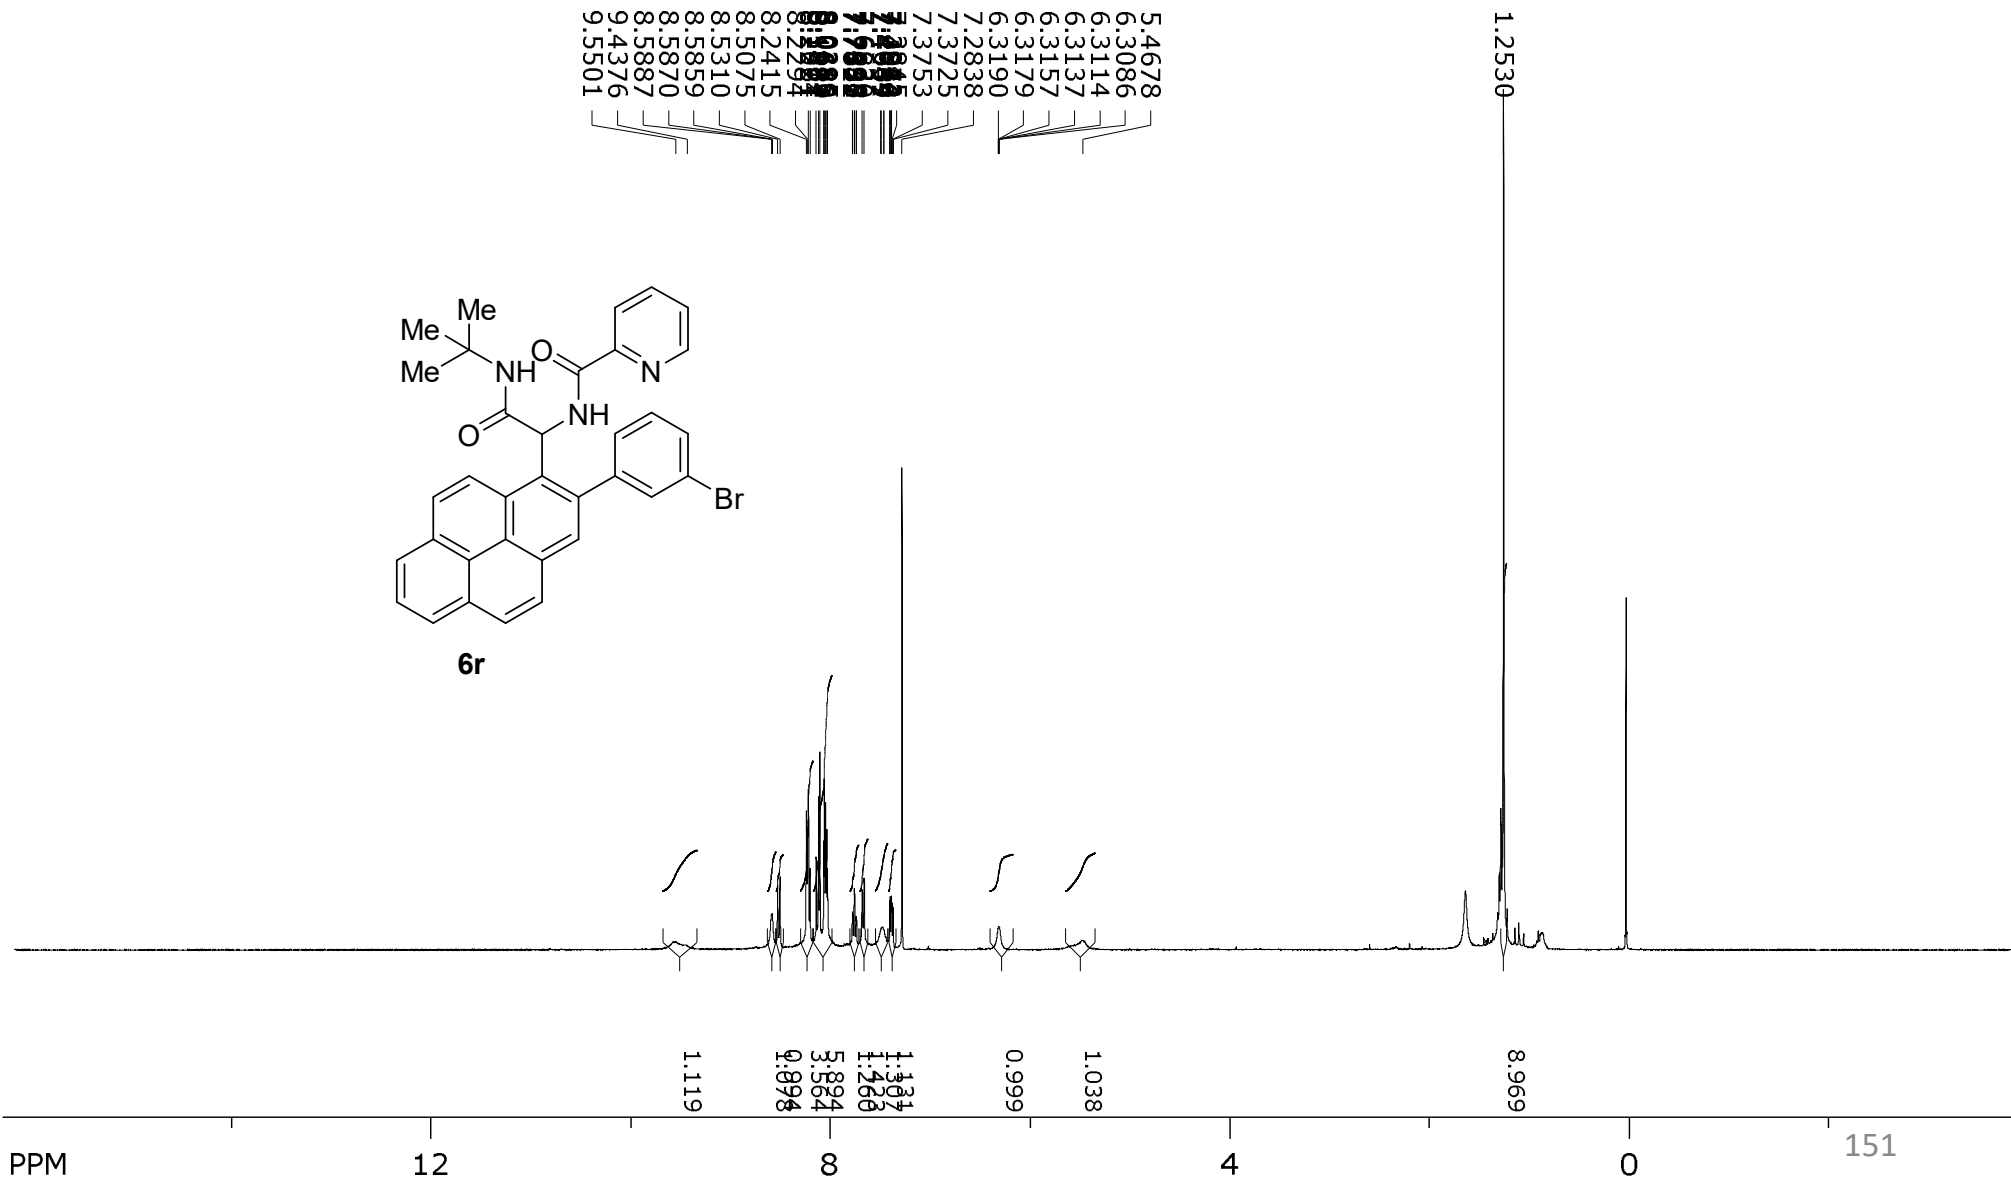

SpinWorks 4: AD 2136 RE  
PROTON CDCl3 /opt/topspin3.5pl2/nmrdata nmrsu 7

9.5501

9.4376

8.5859  
8.5870  
8.5887  
8.5075  
8.5310

8.0295  
8.0389  
8.0486  
8.0612  
8.0676  
8.1081  
8.1214  
8.1437  
8.2064  
8.2221  
8.2294  
8.2415

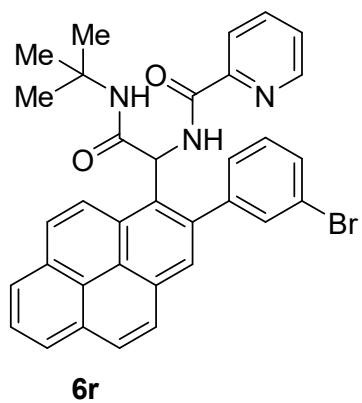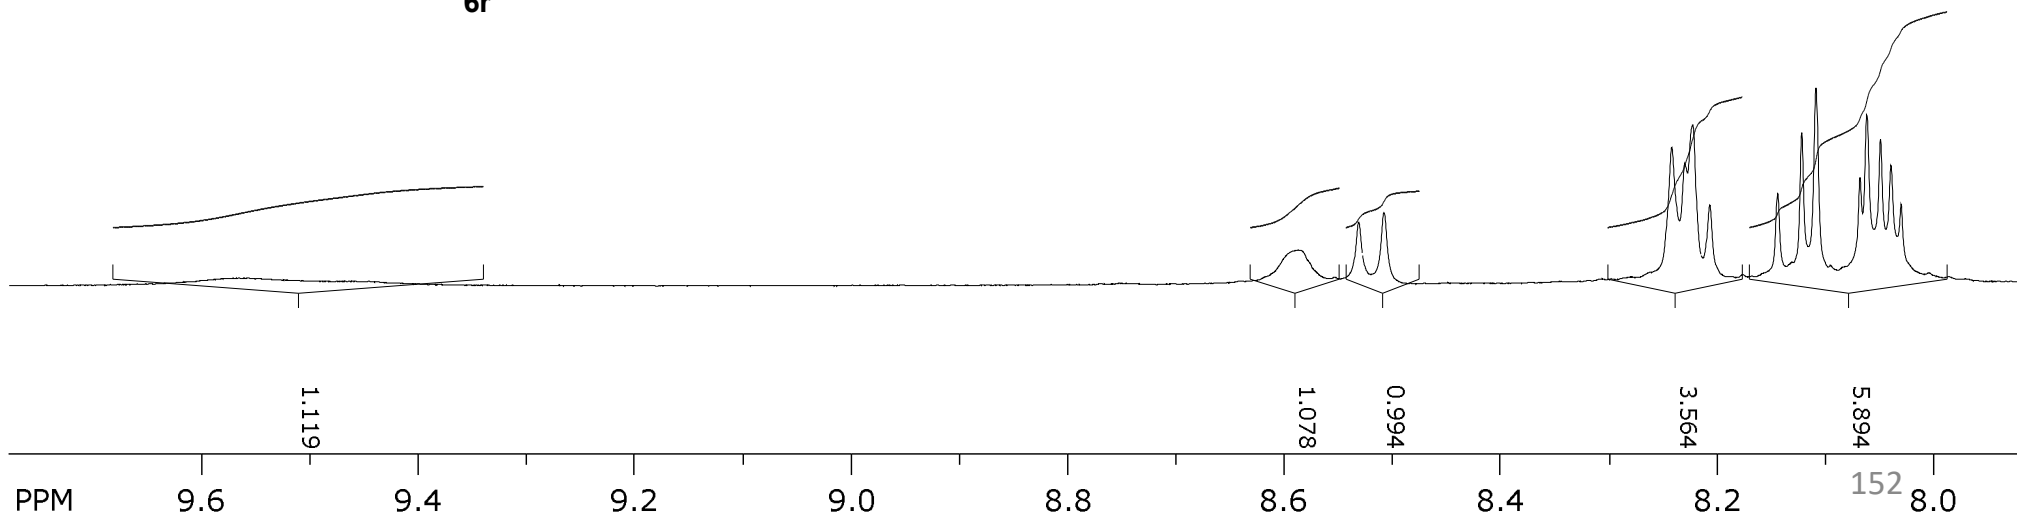



SpinWorks 4: AD 2136 RE  
PROTON CDCl3 /opt/topspin3.5pl2/nmrdata nmrsu 7

7.7398  
7.7437  
7.7592  
7.7630  
7.7783  
7.7822  
7.6636  
7.6820  
7.4949  
7.4957  
7.4664  
7.4669  
7.3725  
7.3753  
7.3845  
7.3874  
7.3914  
7.3942  
7.4034  
7.4062

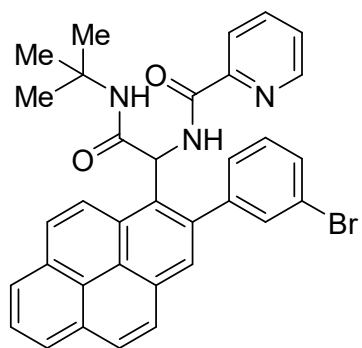

6r

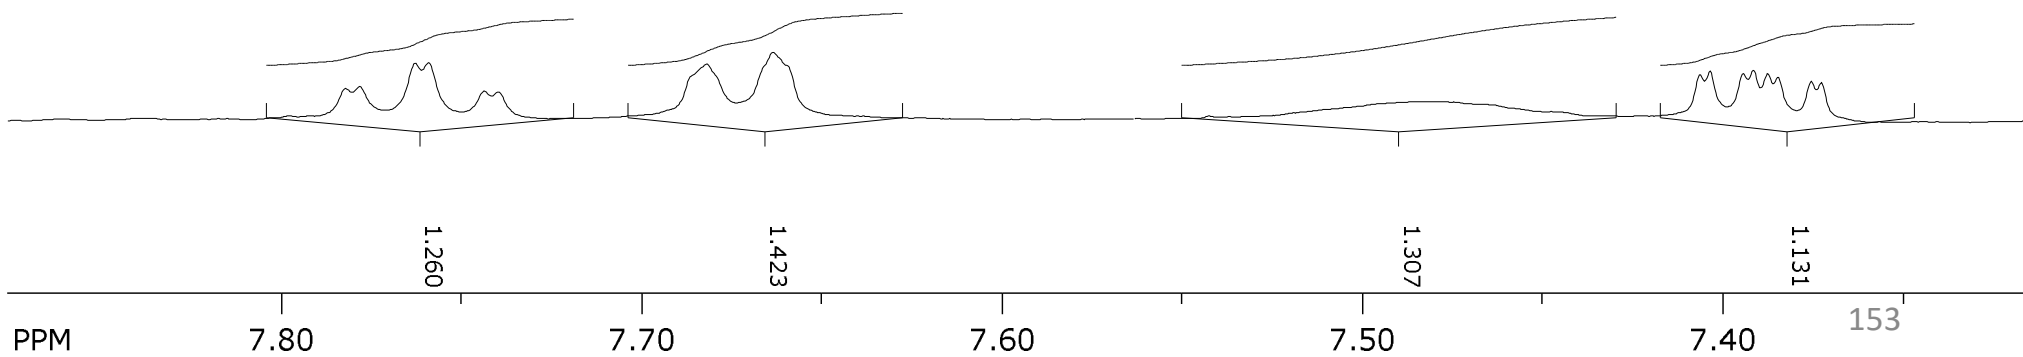

SpinWorks 4: AD 2136 RE  
PROTON CDCl3 /opt/topspin3.5pl2/nmrdata nmrsu 7

6.3086  
6.3114  
6.3137  
6.3157  
6.3179  
6.3190

5.4678

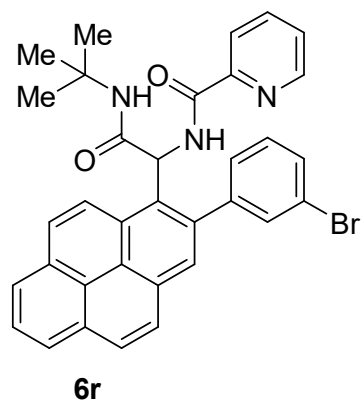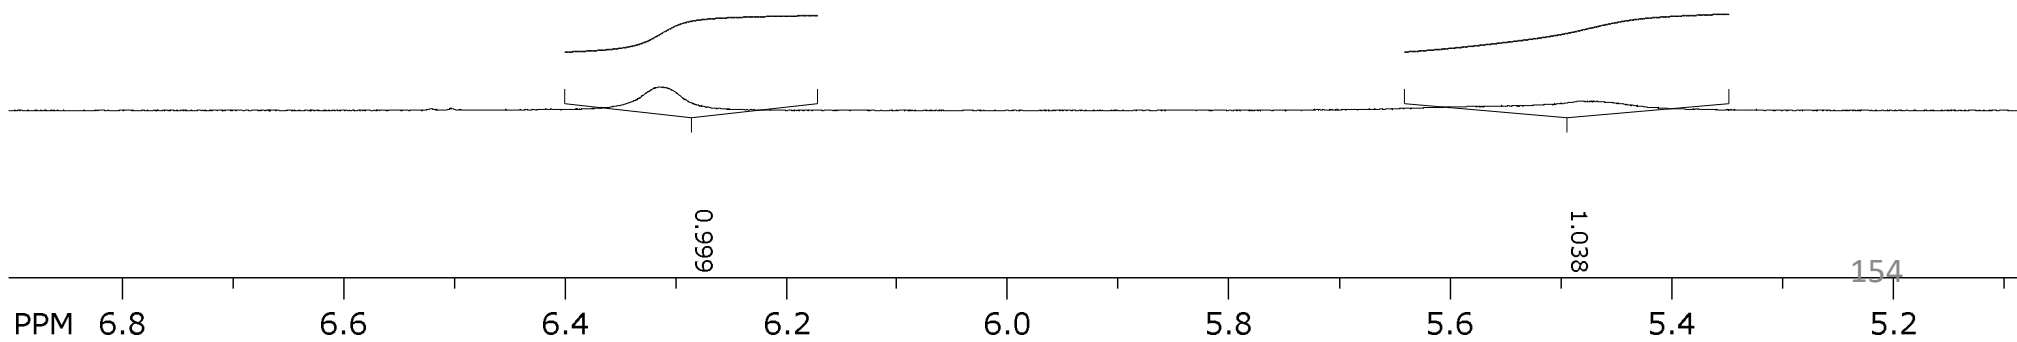

SpinWorks 4: AD-2136-RE  
C13CPD256 CDCl3 /opt/topspin3.5pl2/nmrdata nmrsu 40

169.292  
163.800  
149.563  
148.355  
143.858  
143.848  
139.686  
137.085  
131.168  
131.074  
130.932  
130.509  
129.988  
129.988  
129.988  
129.988  
125.649  
125.208  
124.600  
123.669  
122.078  
122.060

77.367  
77.049  
76.731

55.101  
51.865

28.539

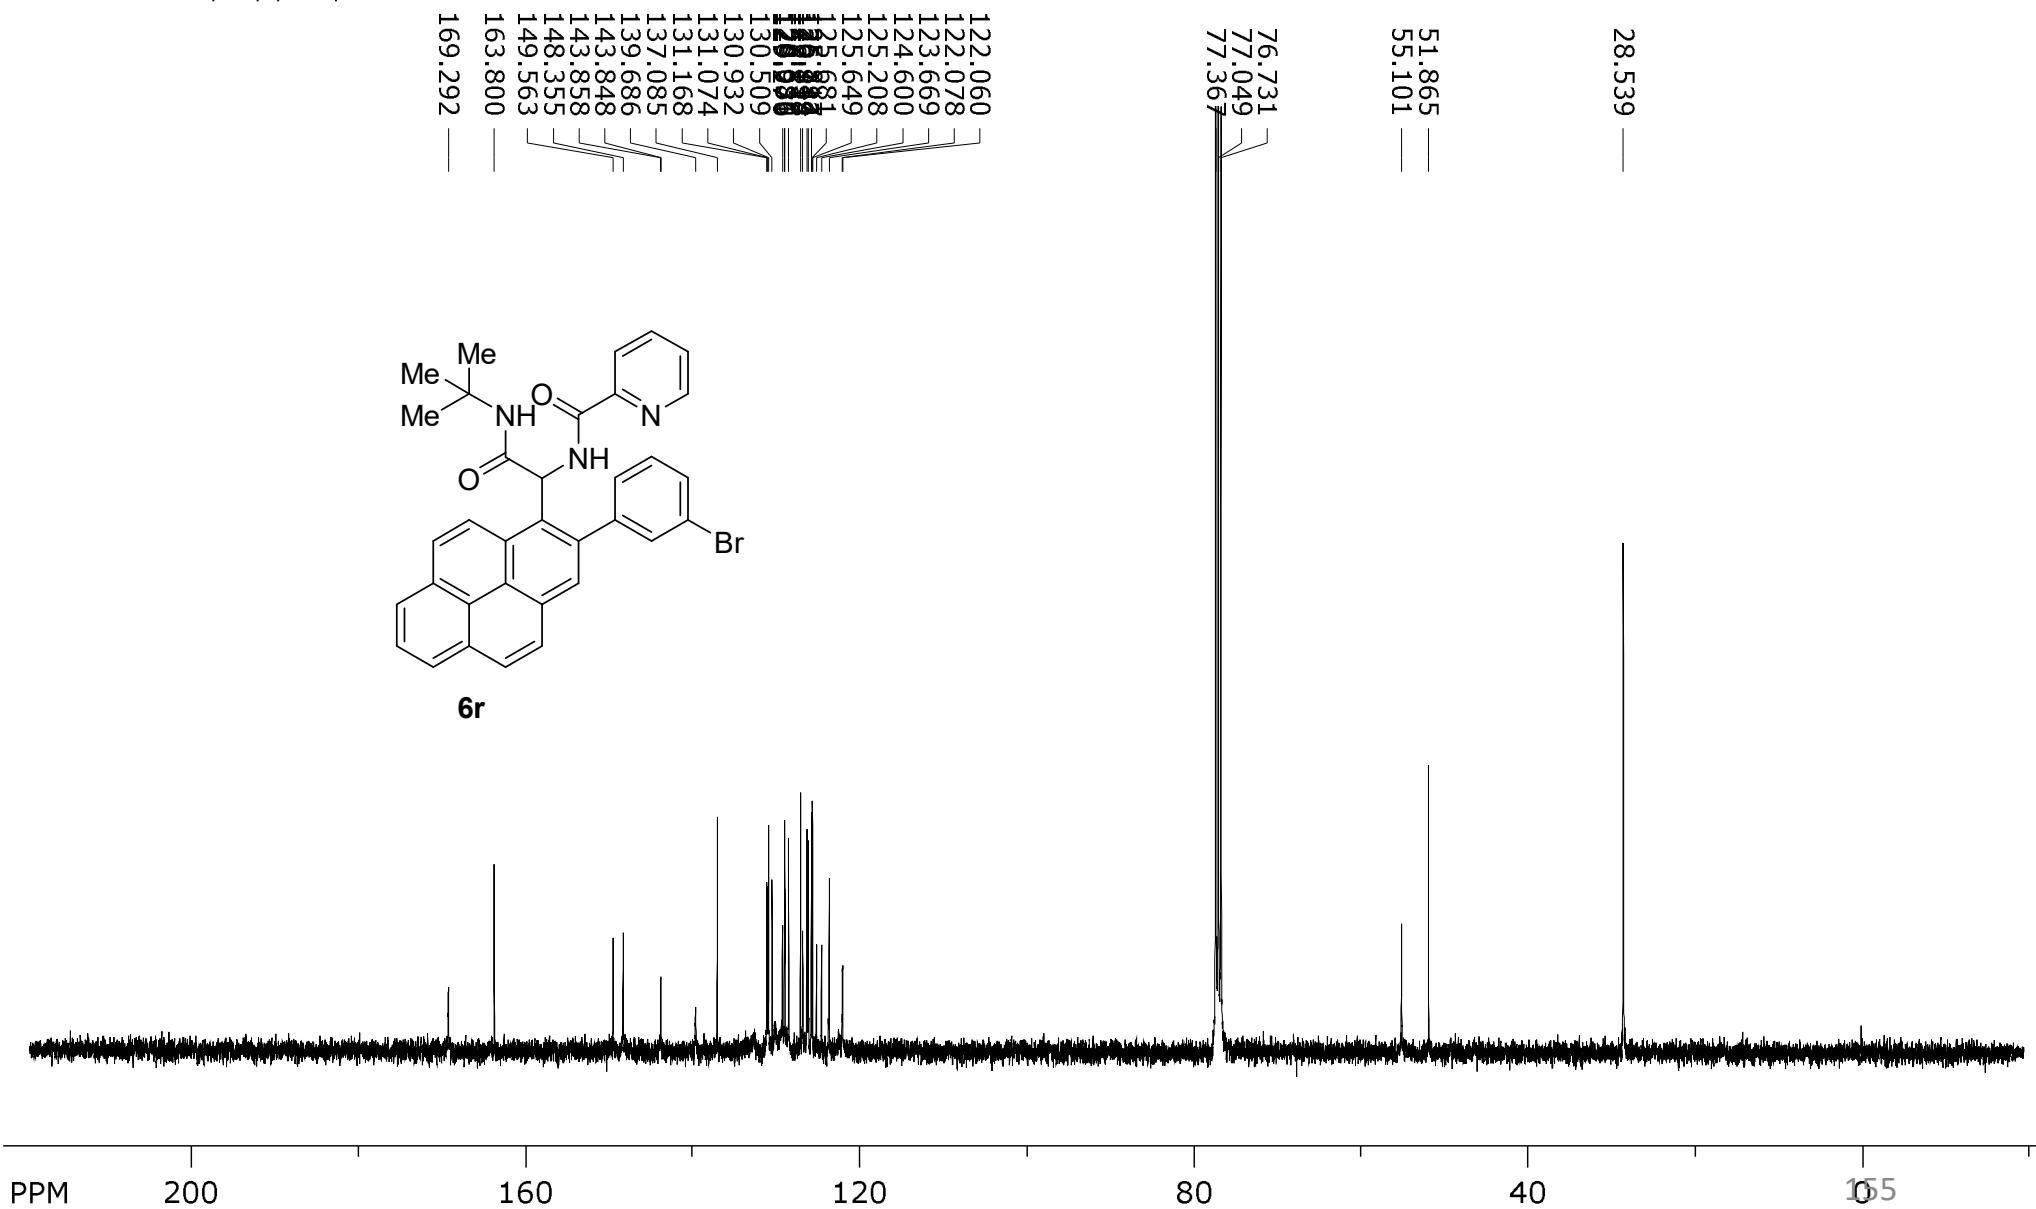

SpinWorks 4: AD-2136-RE  
C13CPD256 CDCl3 /opt/topspin3.5pl2/nmrdata nmrsu 40

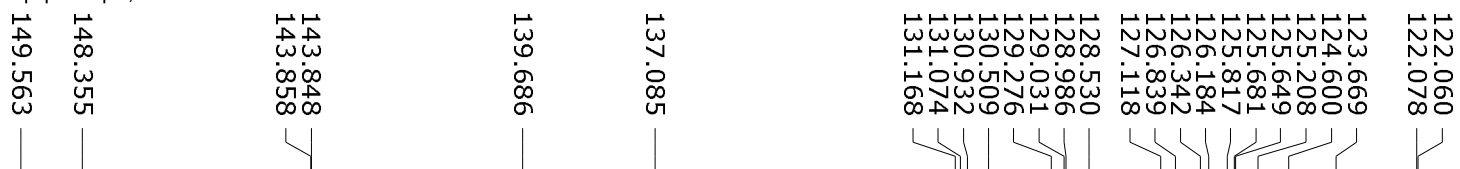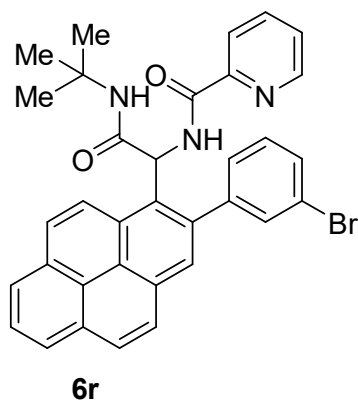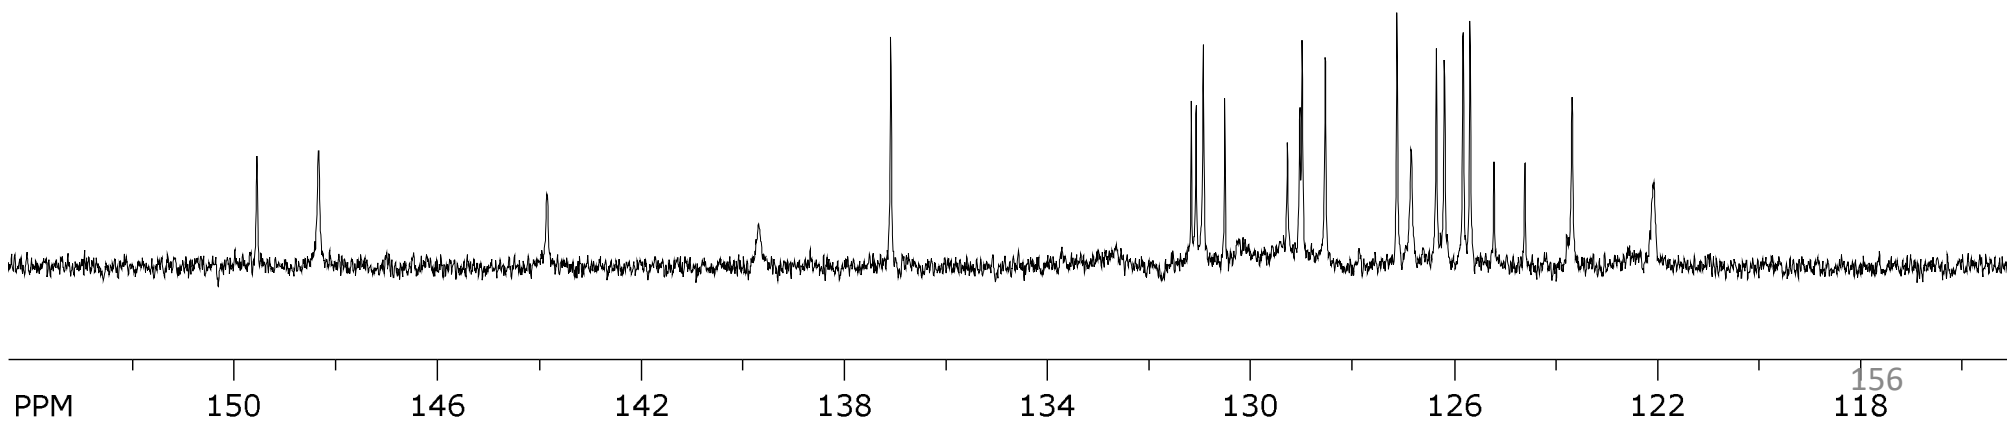

SpinWorks 4: AD-1934 RE  
PROTON CDCl3 /opt/topspin3.5pl2/nmrdata nmrsu 40

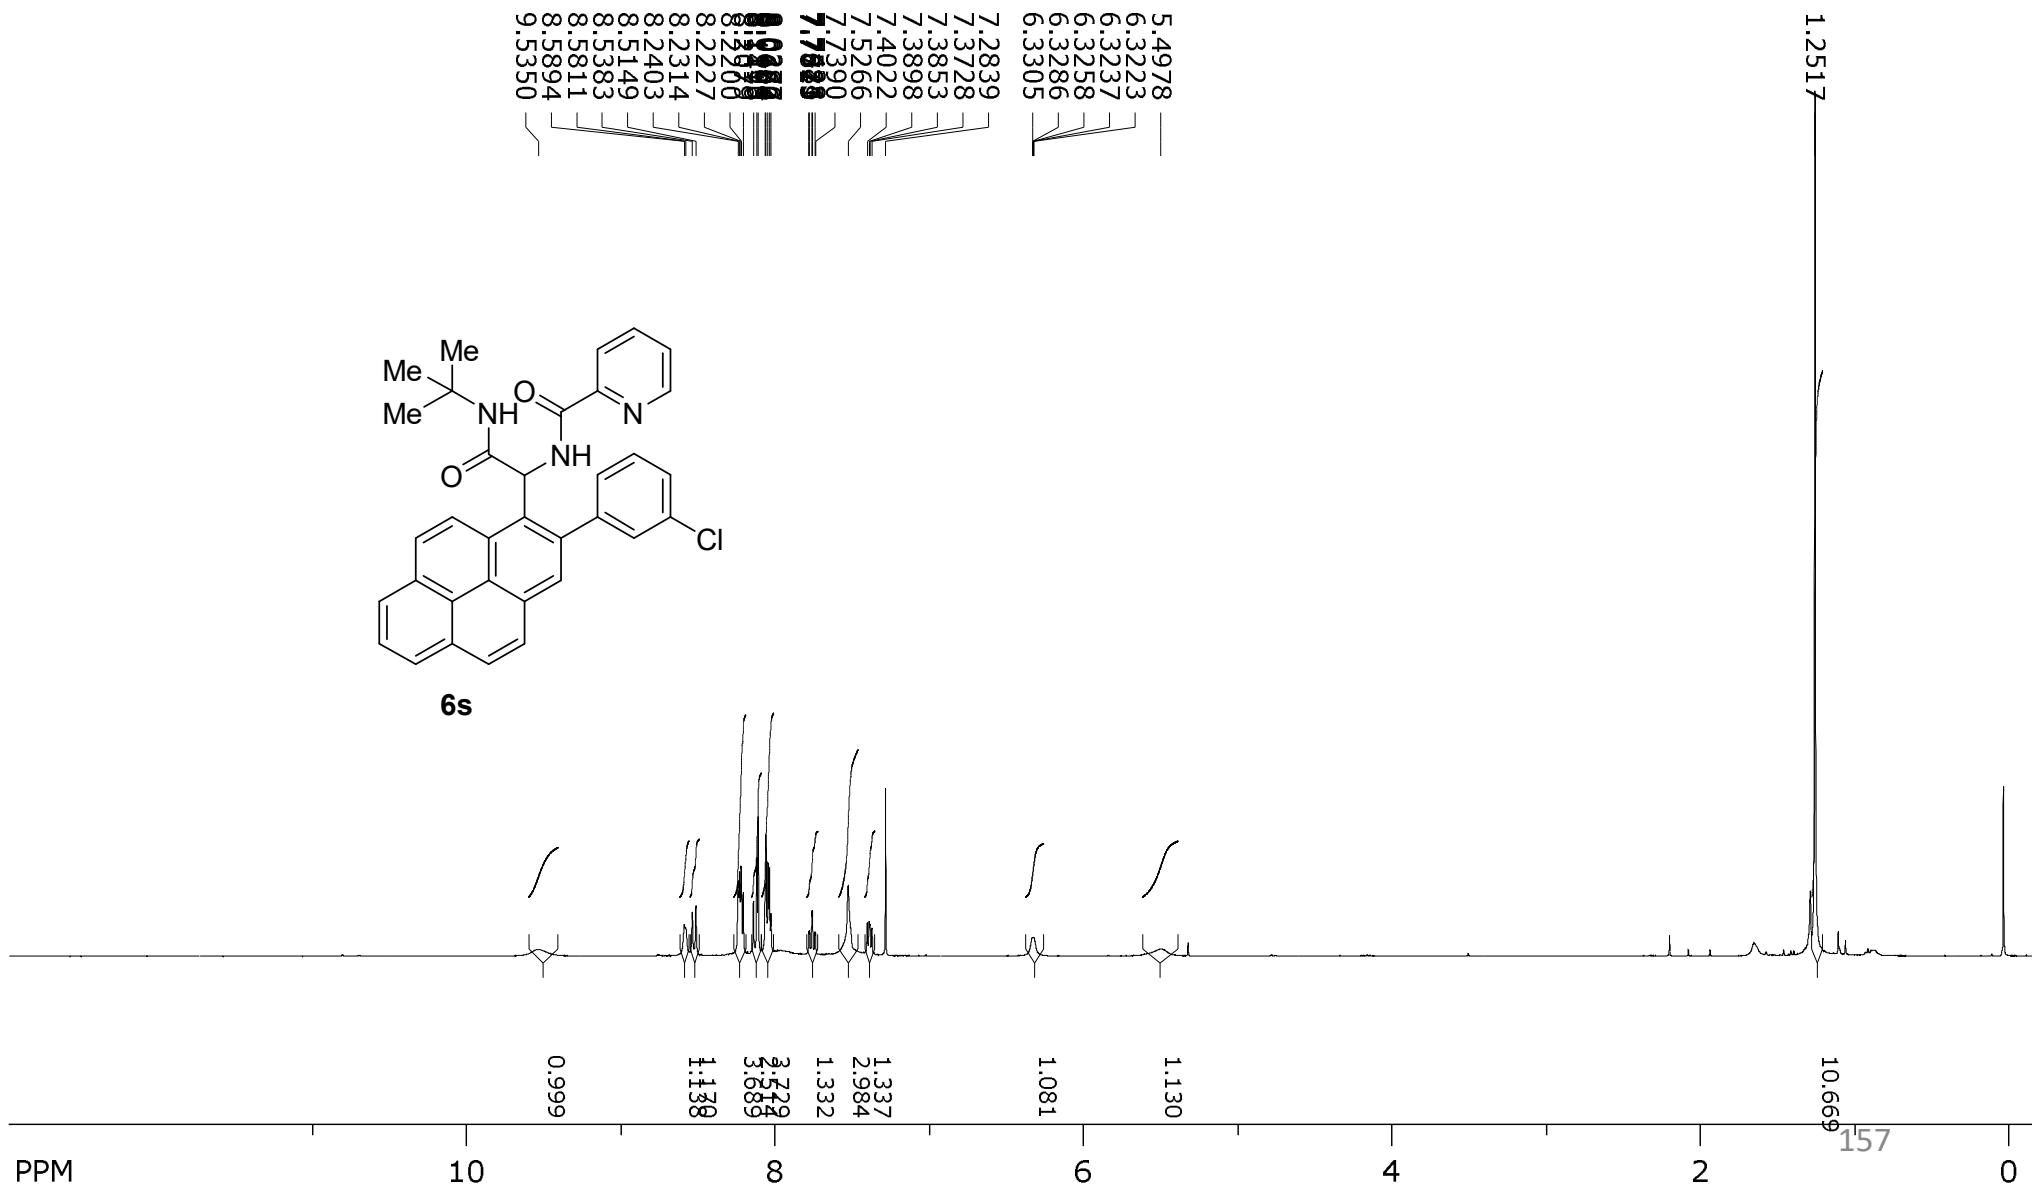

SpinWorks 4: AD-1934 RE  
PROTON CDCl3 /opt/topspin3.5pl2/nmrdata nmrsu 40

8.5149  
8.5383  
8.5811  
8.5894

8.0277  
8.0380  
8.0466  
8.0602  
8.0654  
8.1109  
8.1193  
8.1416  
8.2079  
8.2200  
8.2227  
8.2314  
8.2403

7.7390  
7.7428  
7.7583  
7.7621  
7.7775  
7.7813

7.5266

7.3728  
7.3853  
7.3898  
7.4022

7.2839

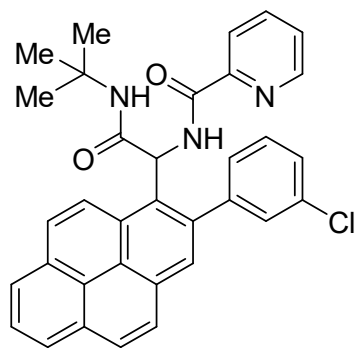

6s

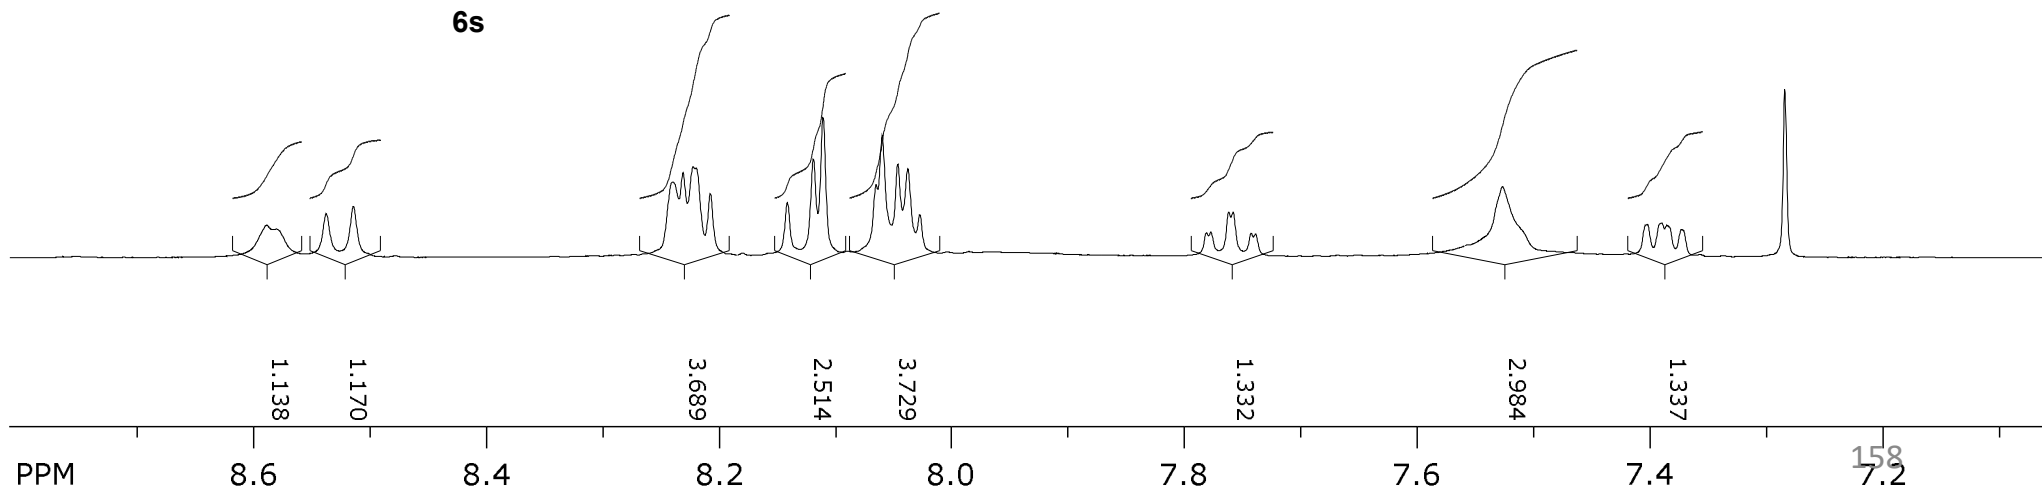

SpinWorks 4: AD-1934 RE  
PROTON CDCl3 /opt/topspin3.5pl2/nmrdata nmrsu 40

6.32223  
6.32237  
6.32558  
6.32885  
6.33005

5.49778



6s

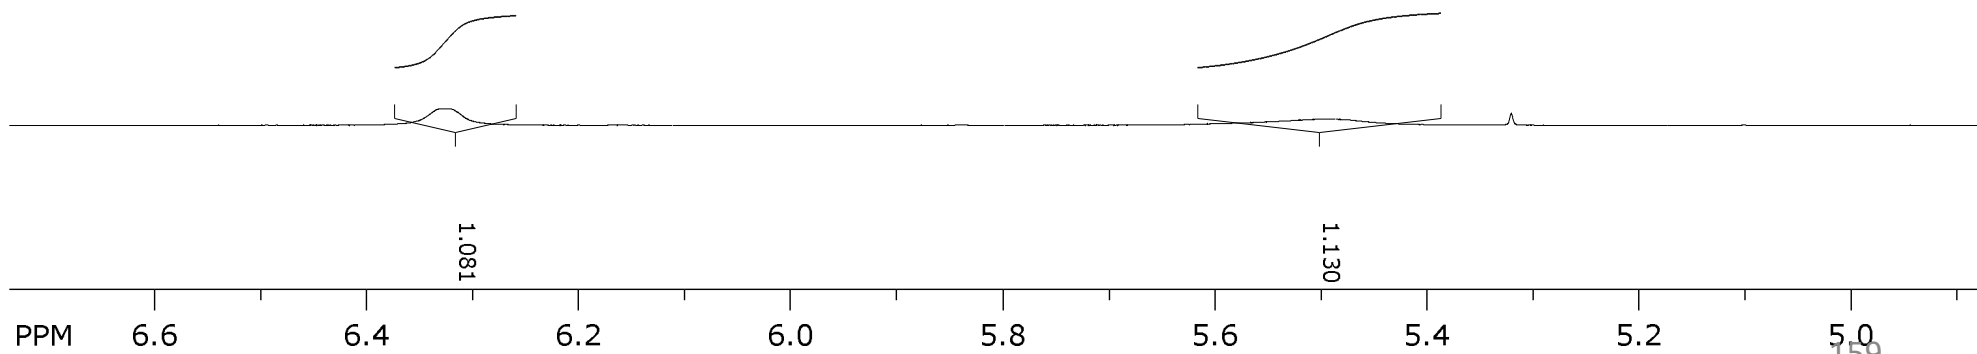

SpinWorks 4: AD-1934  
C13CPD256 CDCl3 /opt/topspin3.5pl2/nmrdata nmrsu 33

122.089  
123.653  
124.586  
125.193  
125.649  
125.690  
125.835  
129.954  
129.970  
130.488  
131.079  
131.150  
137.123  
139.770  
143.548  
148.350  
149.516  
169.337  
163.826

76.770  
77.087  
77.406

51.877  
55.084

28.528



6s

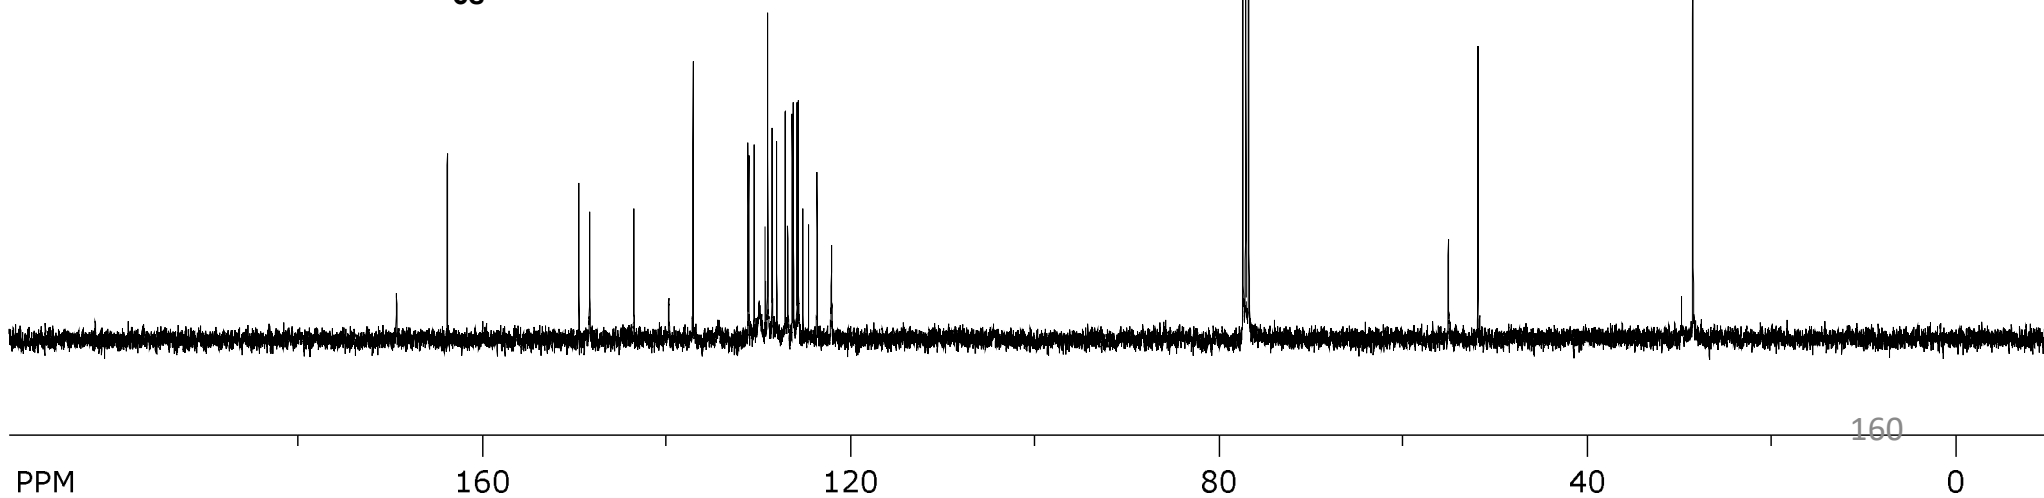



SpinWorks 4: AD-1934  
C13CPD256 CDCl3 /opt/topspin3.5pl2/nmrdata nmrsu 33

149.516 —  
148.350 —  
143.548 —  
139.770 —  
137.123 —  
128.044 —  
128.507 —  
128.539 —  
129.011 —  
129.281 —  
129.954 —  
129.970 —  
130.488 —  
131.079 —  
131.150 —  
127.115 —  
126.843 —  
126.352 —  
126.229 —  
125.835 —  
125.690 —  
125.649 —  
125.193 —  
124.586 —  
123.653 —  
122.089 —

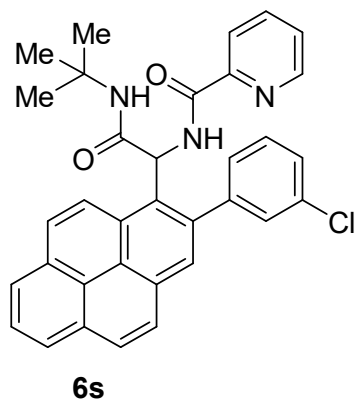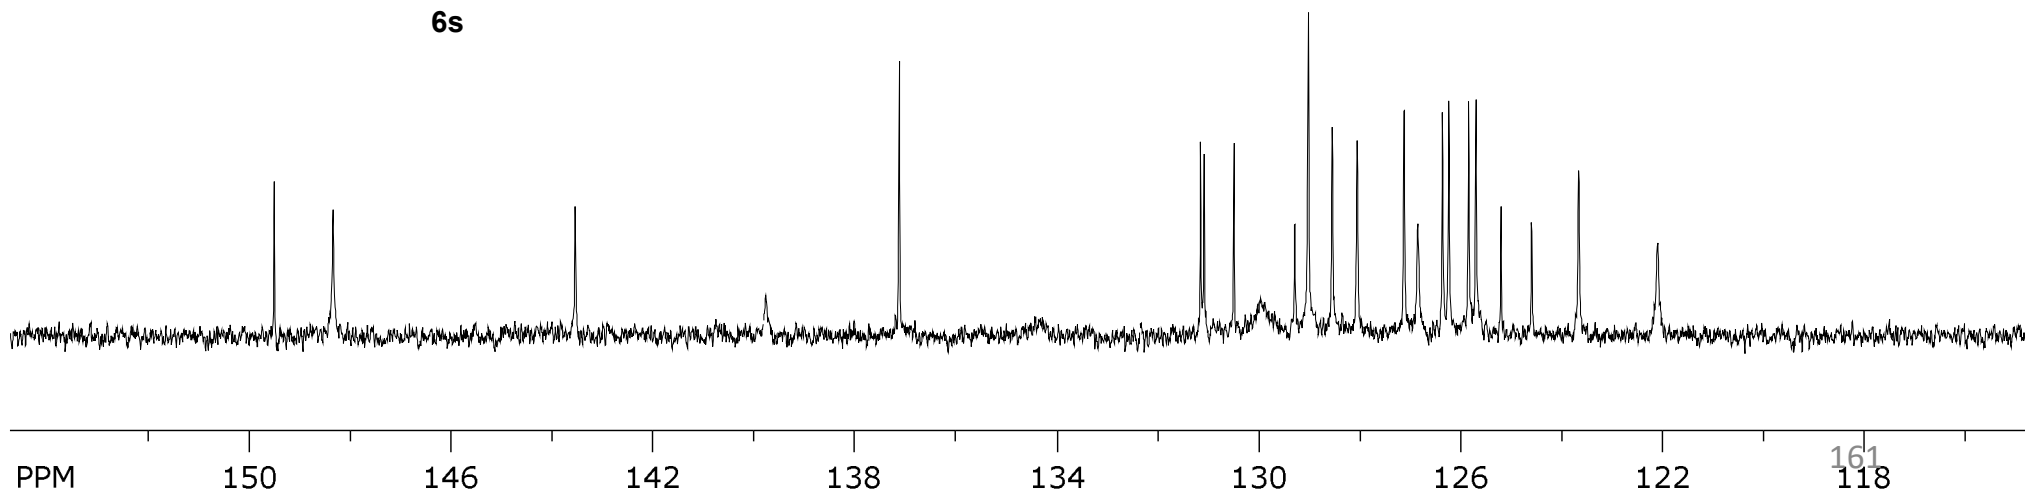

SpinWorks 4: SUB-49(R2)  
PROTON CDCl3 /opt/topspin3.5pl2/nmrdata nmrsu 36

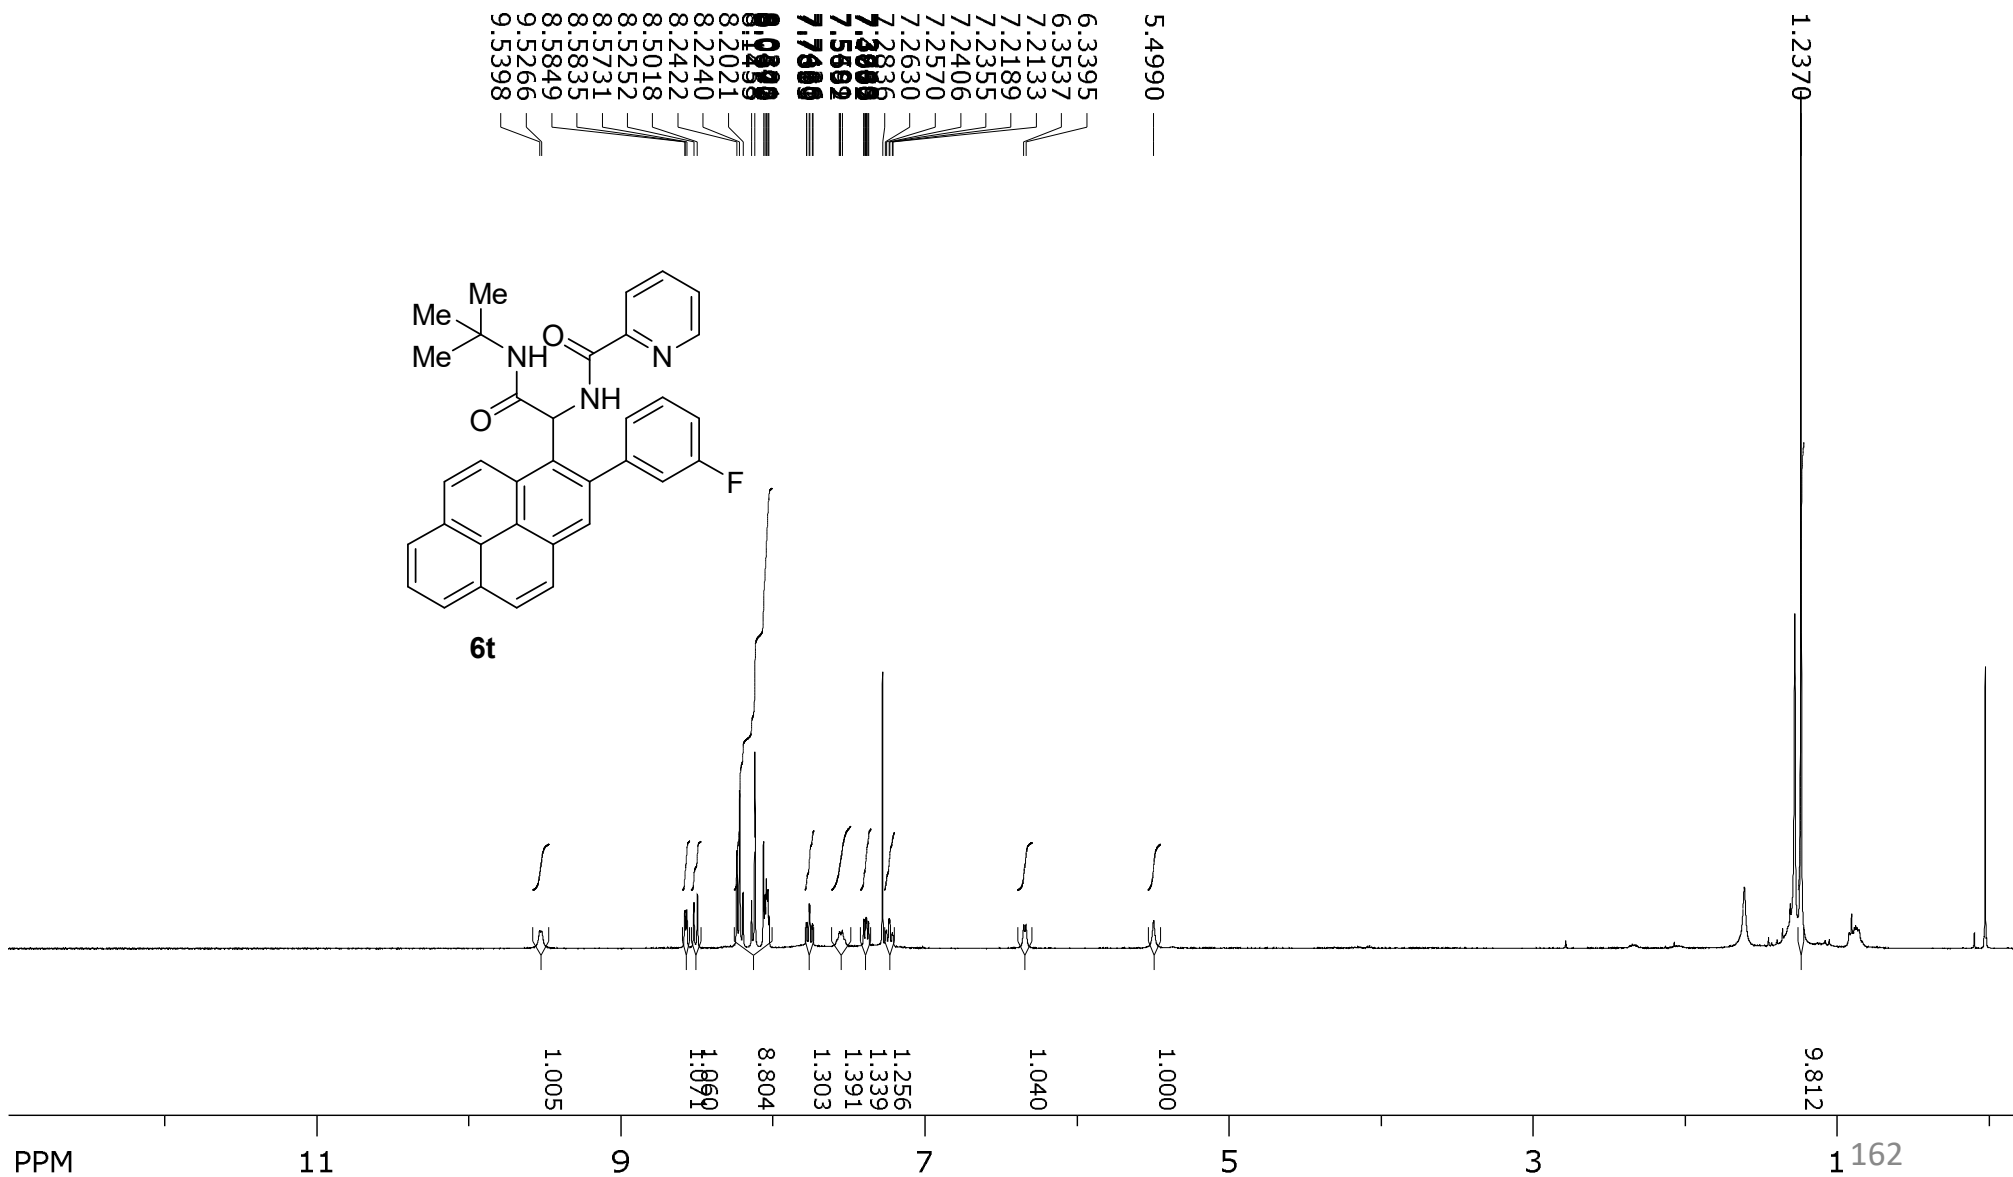

SpinWorks 4: SUB-49(R2)  
PROTON CDCl3 /opt/topspin3.5pl2/nmrdata nmrsu 36

8.5731  
8.5849

8.5252  
8.5018

8.2422  
8.2240  
8.2021

8.1455  
8.1238

8.0670  
8.0573  
8.0492  
8.0440  
8.0378  
8.0301

7.7853  
7.7811  
7.7660  
7.7620  
7.7468  
7.7426

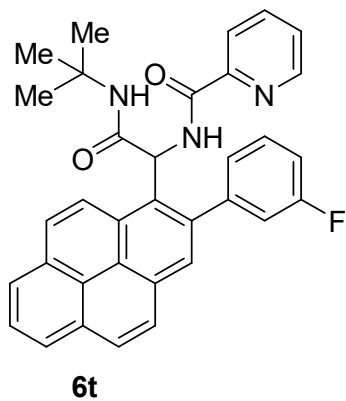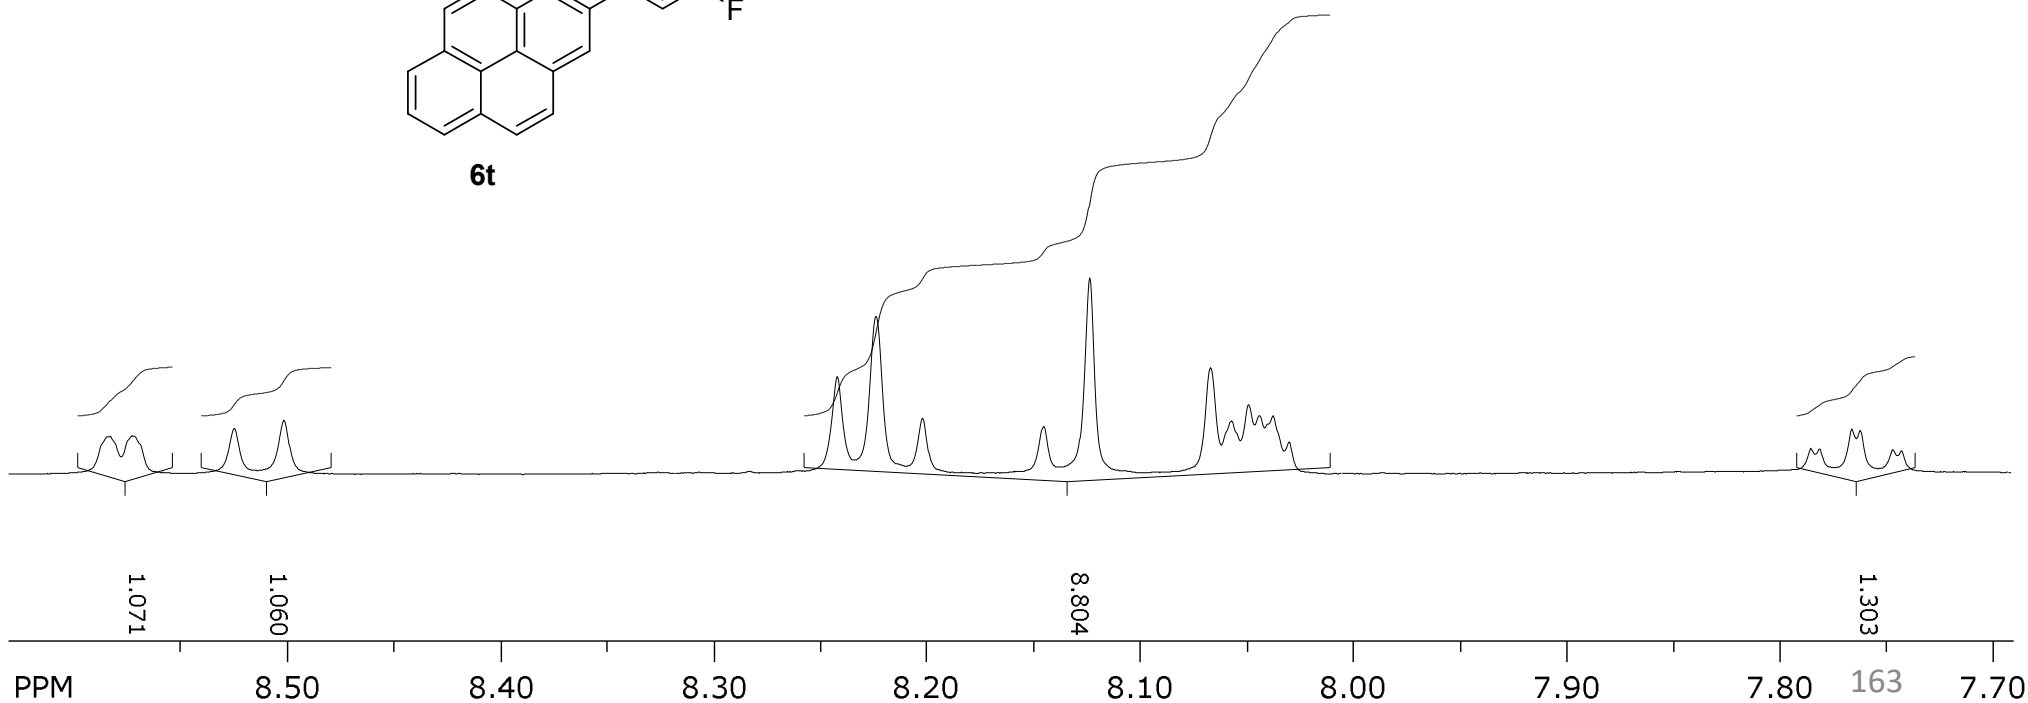

SpinWorks 4: SUB-49(R2)  
PROTON CDCl3 /opt/topspin3.5pl2/nmrdata nmrsu 36

7.5491  
7.5589  
7.5662  
7.5692

7.3743  
7.3768  
7.3863  
7.3889  
7.3930  
7.3956  
7.4052  
7.4077

7.2133  
7.2189  
7.2355  
7.2406  
7.2570  
7.2630  
7.2836

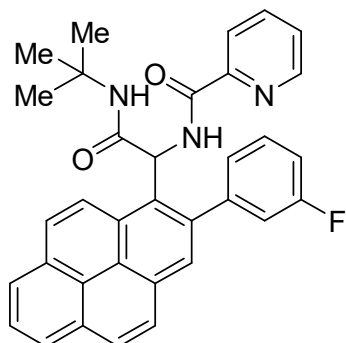

6t

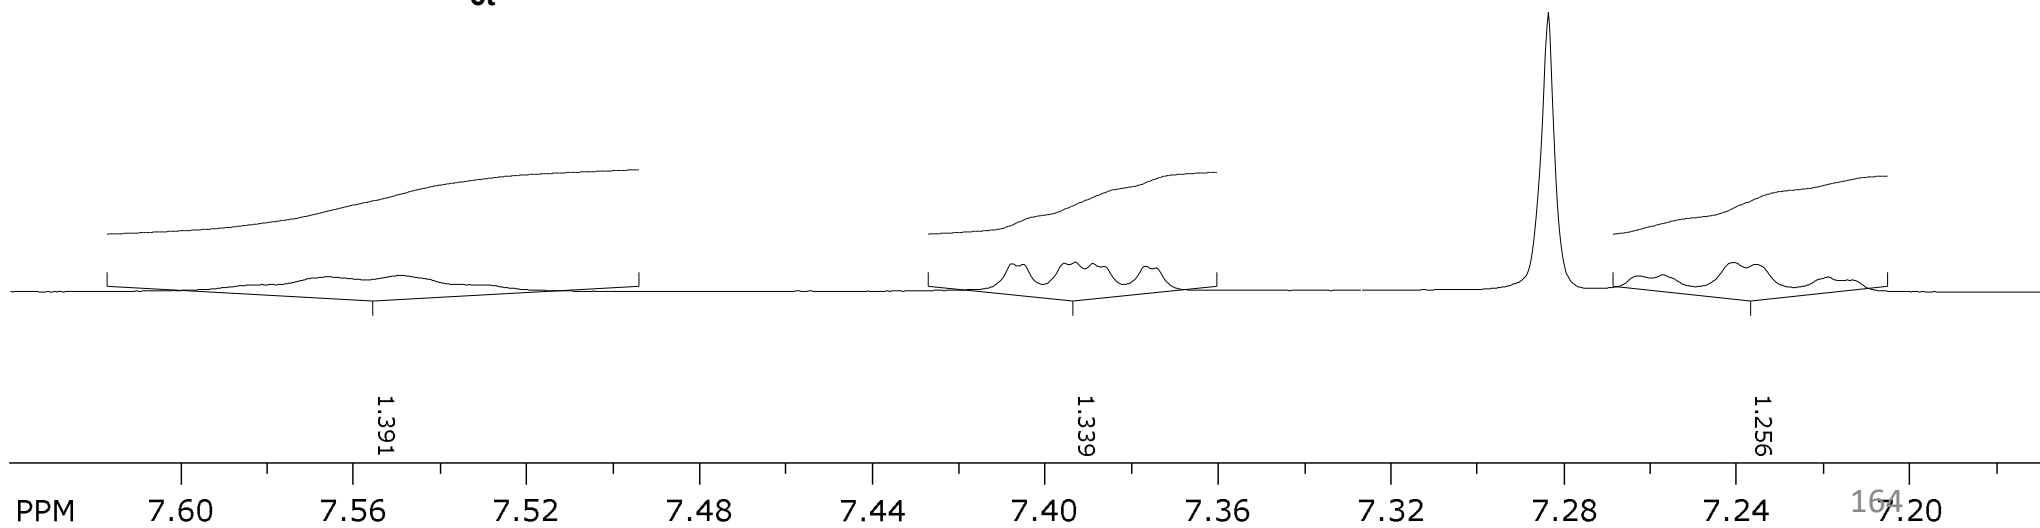

SpinWorks 4: SUB-49  
C13CPD256 CDCl3 /opt/topspin3.5pl2/nmrdata nmrsu 11

114.758  
114.964  
122.094  
123.675  
124.610  
125.186  
125.674  
125.806  
126.859  
127.027  
127.027  
130.497  
131.078  
131.157  
137.115  
139.938  
139.948  
139.975  
143.846  
143.924  
148.313  
149.548  
161.386  
163.800  
163.847  
169.391

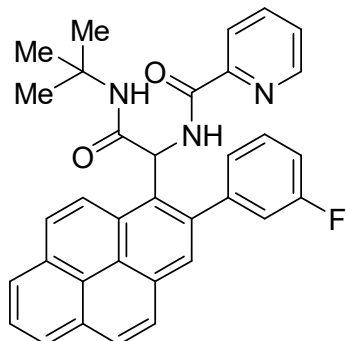

6t

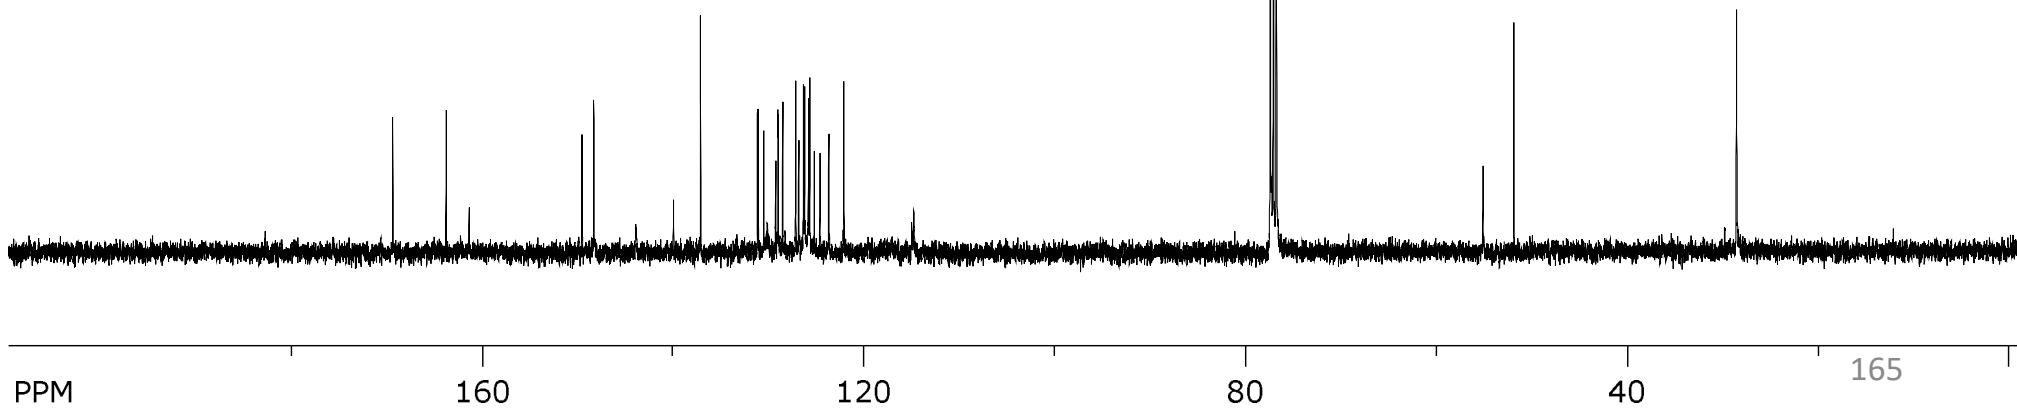

SpinWorks 4: SUB-49  
C13CPD256 CDCl3 /opt/topspin3.5pl2/nmrdata nmrsu 11

169.391 —  
163.800 —  
163.847 —  
161.386 —  
149.548 —  
148.313 —  
143.846 —  
143.924 —  
139.938 —  
139.948 —  
139.975 —  
137.115 —  
131.157 —  
131.078 —  
130.497 —  
130.120 —  
129.242 —  
128.997 —  
128.971 —  
128.507 —  
127.139 —  
126.816 —  
126.331 —  
126.211 —  
125.806 —  
125.674 —  
125.186 —  
124.610 —  
123.675 —  
122.094 —  
114.758 —  
114.964 —



6t

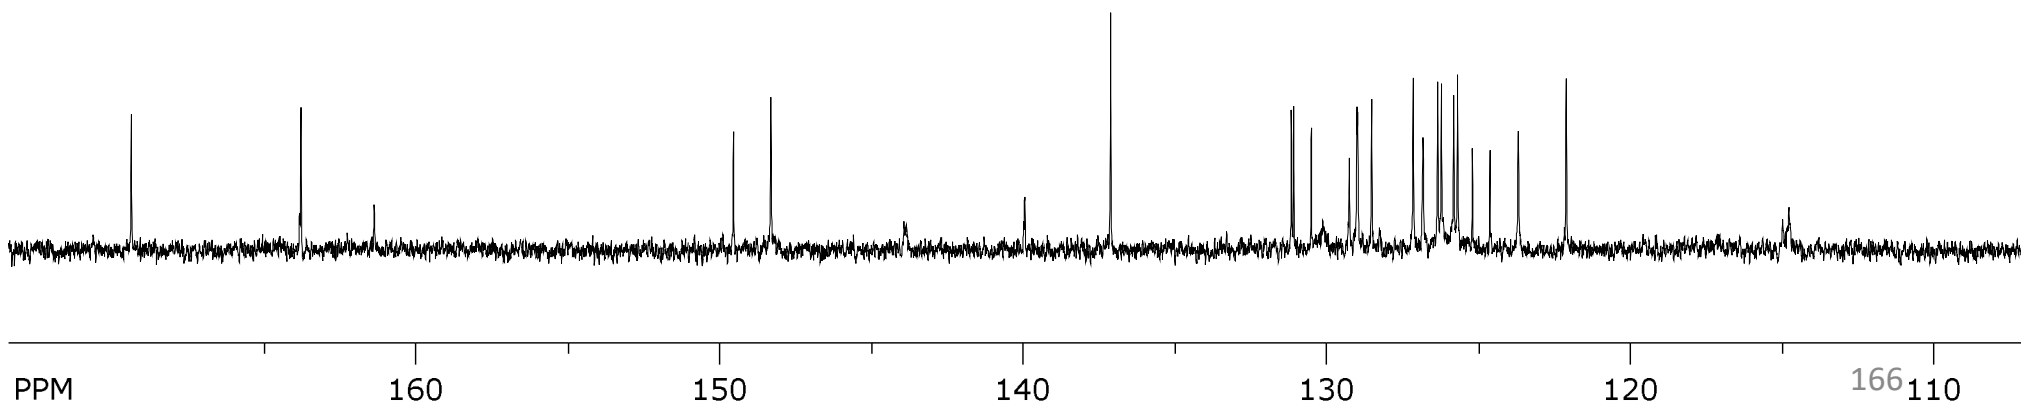

SpinWorks 4: SUB 49  
F19CPD CDCl3 /opt/topspin3.5pl2/nmrdata nmrsu 23

$^{19}\text{F}$  NMR (~376 MHz,  $\text{CDCl}_3$ )

-113.074  
-111.643

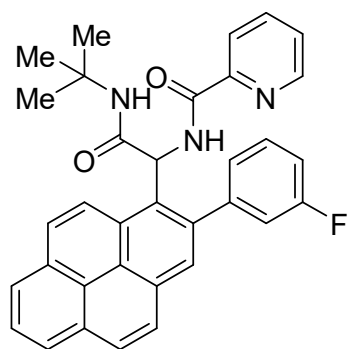

6t

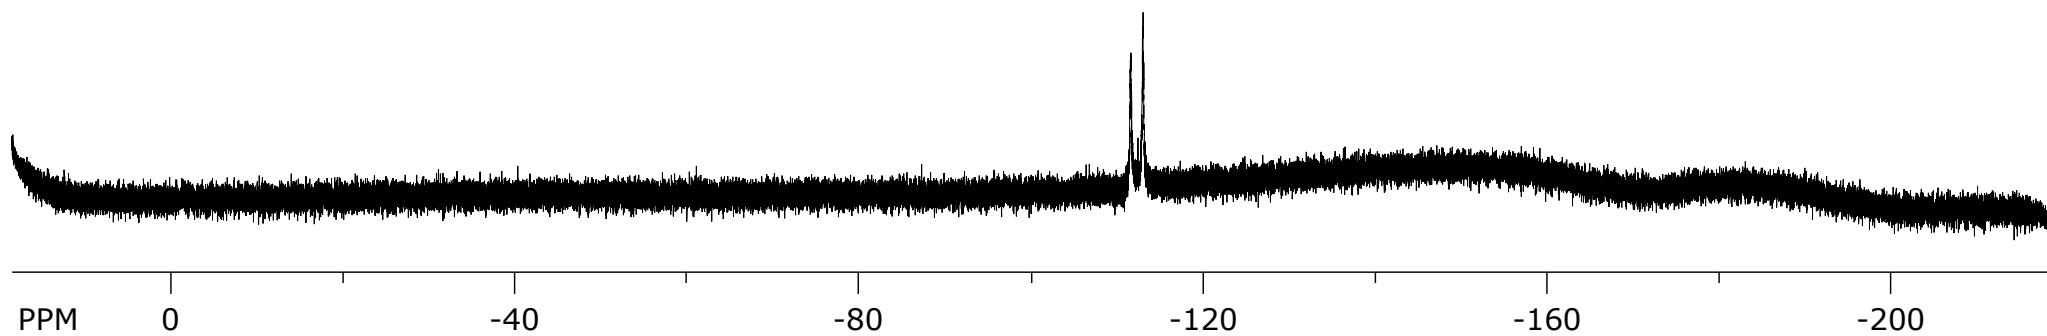

SpinWorks 4: AD-2114RE  
 PROTON CDCl3 /opt/topspin3.5pl2/nmrdata nmrsu 56

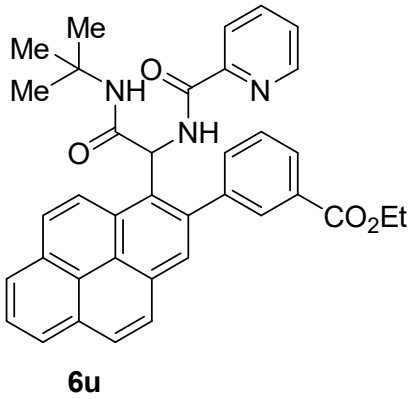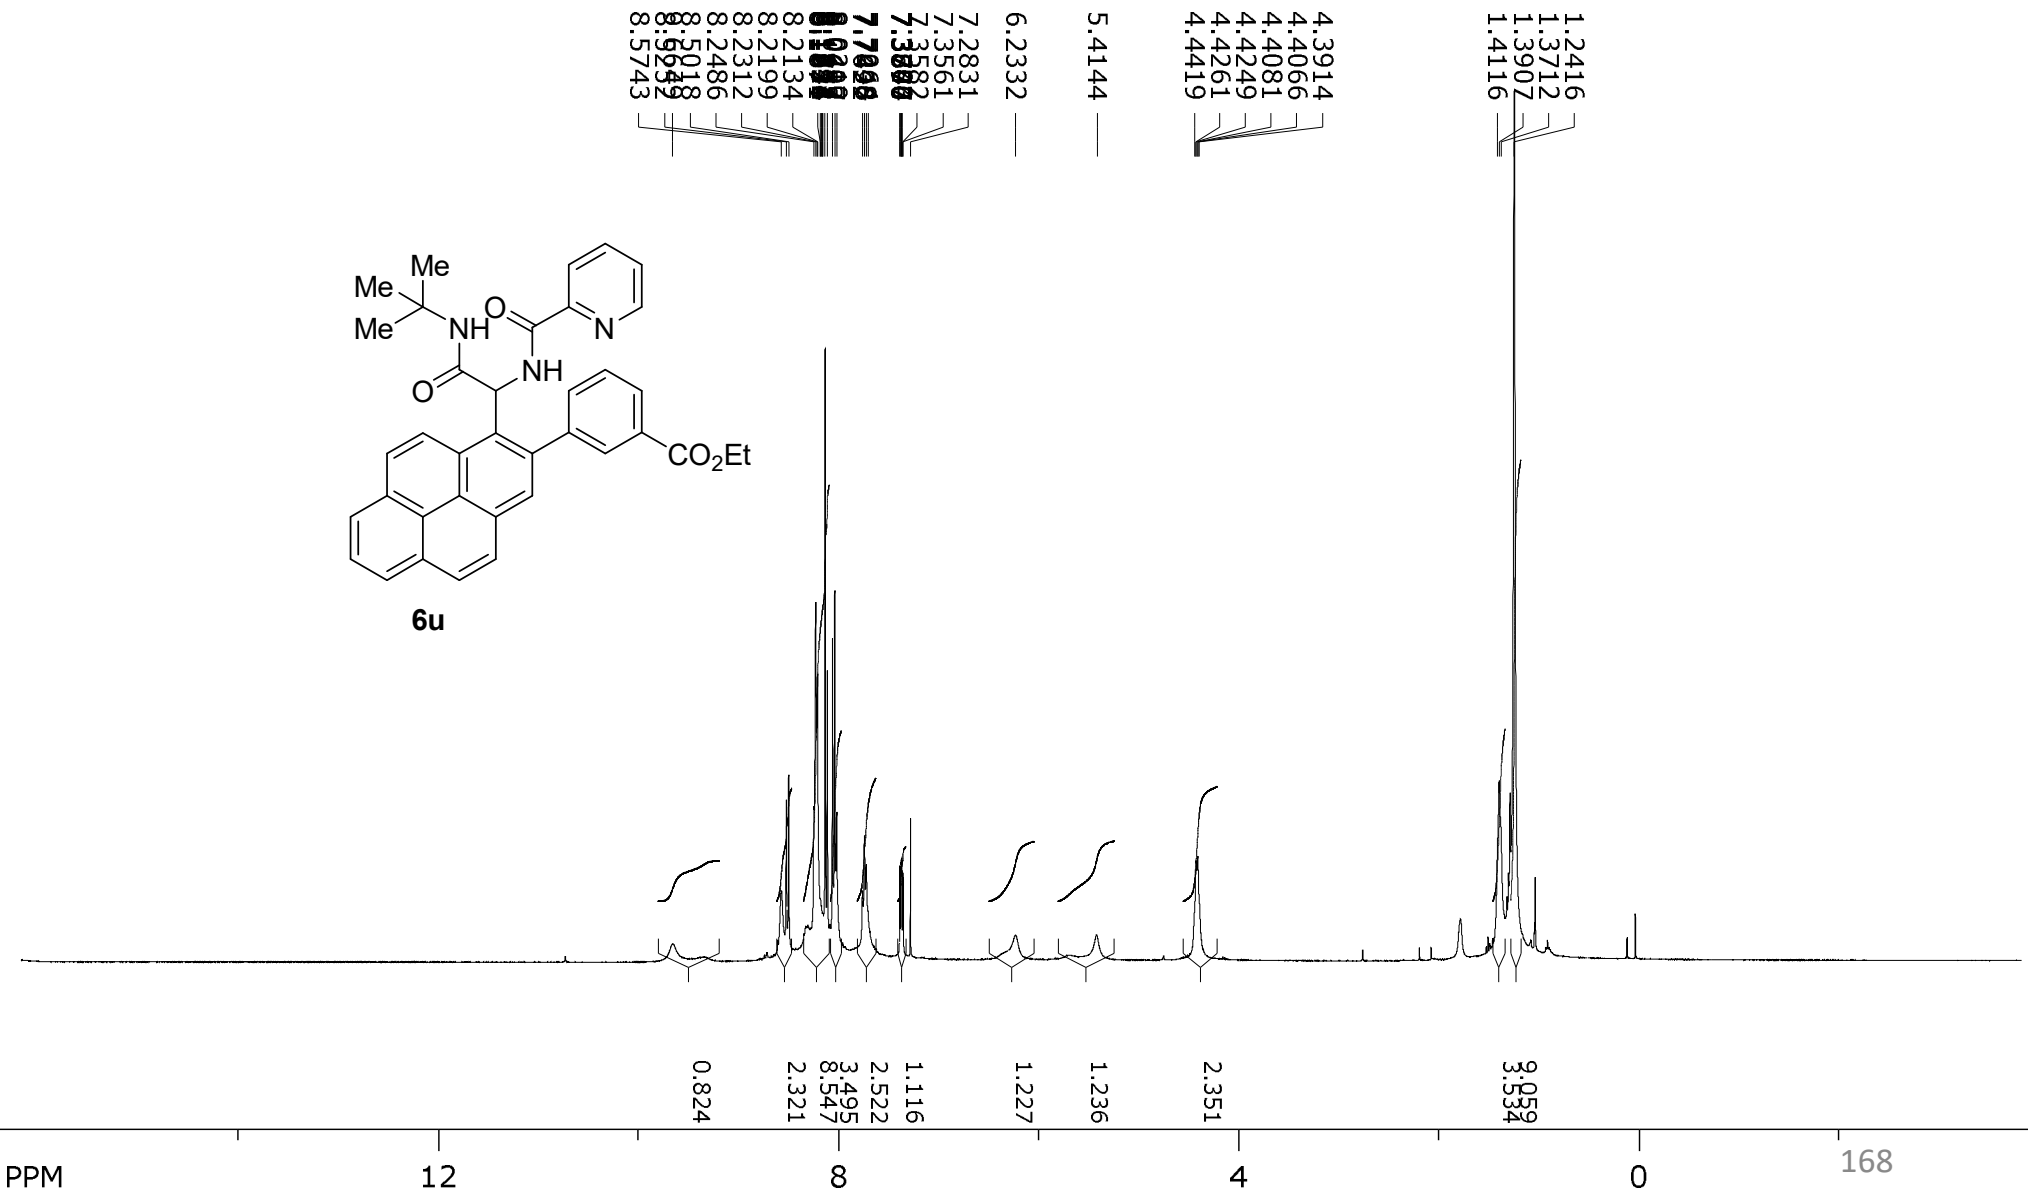



SpinWorks 4: AD-2114RE  
PROTON CDCl3 /opt/topspin3.5pl2/nmrdata nmrsu 56

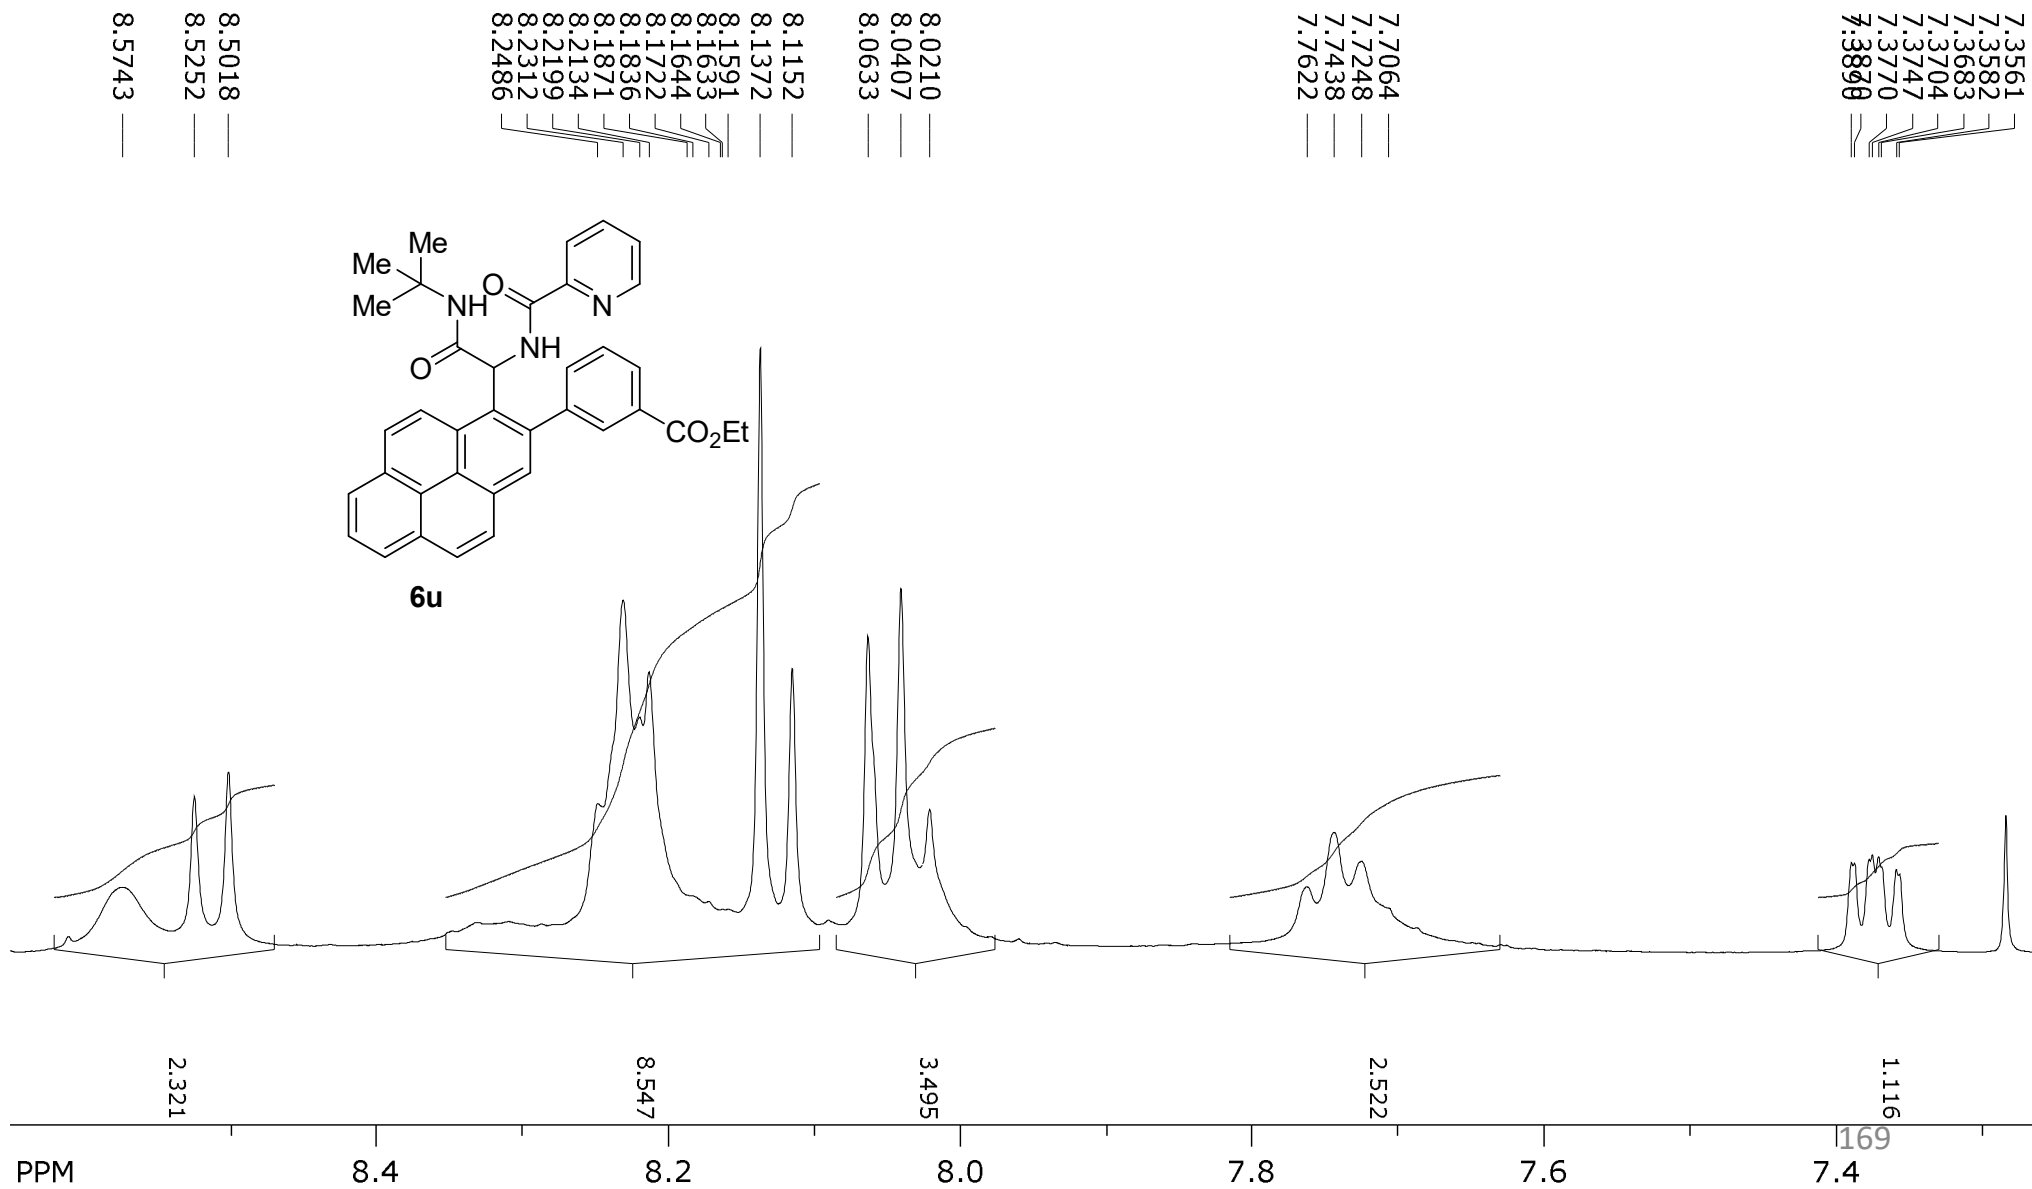

SpinWorks 4: AD-2114RE  
PROTON CDCl3 /opt/topspin3.5pl2/nmrdata nmrsu 56

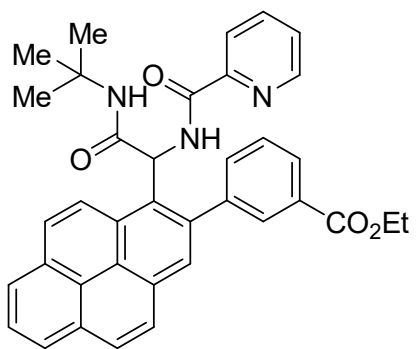

6.2332

5.4144

4.3914  
4.4066  
4.4261  
4.4419

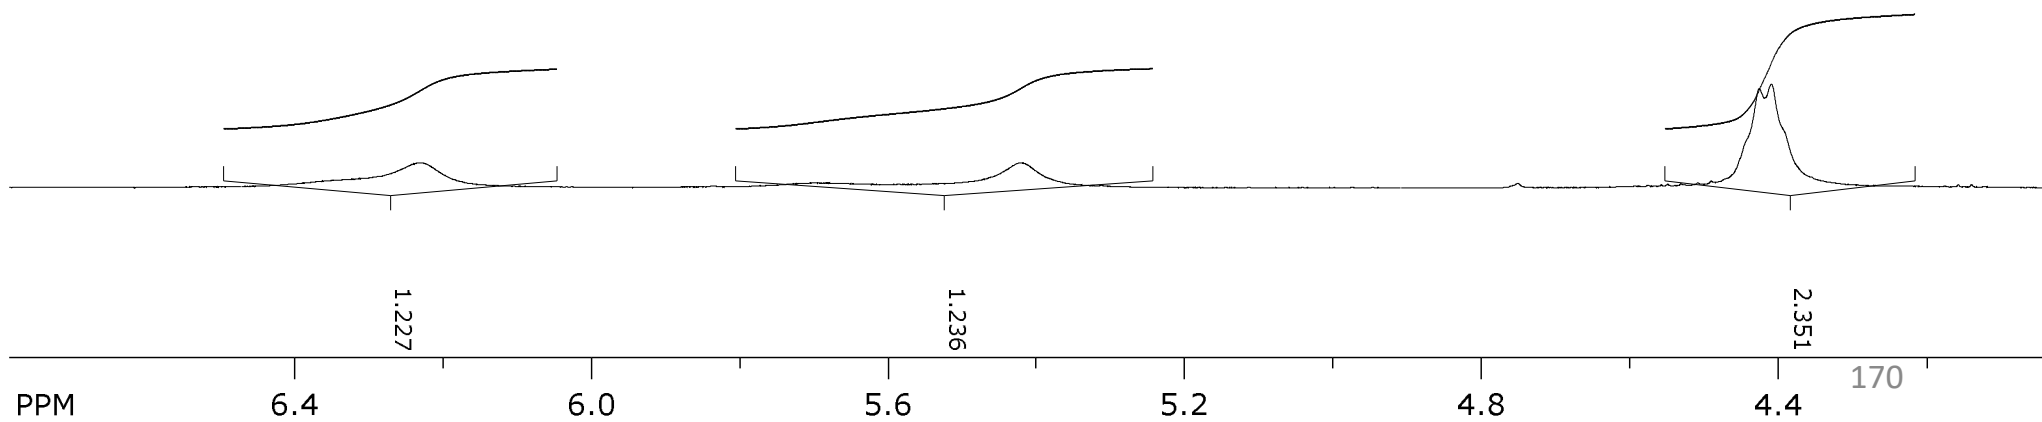

SpinWorks 4: AD-2114RE  
PROTON CDCl3 /opt/topspin3.5pl2/nmrdata nmrsu 56

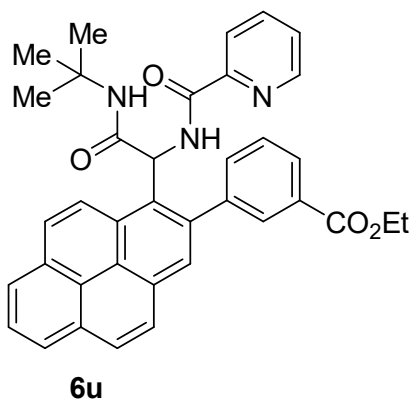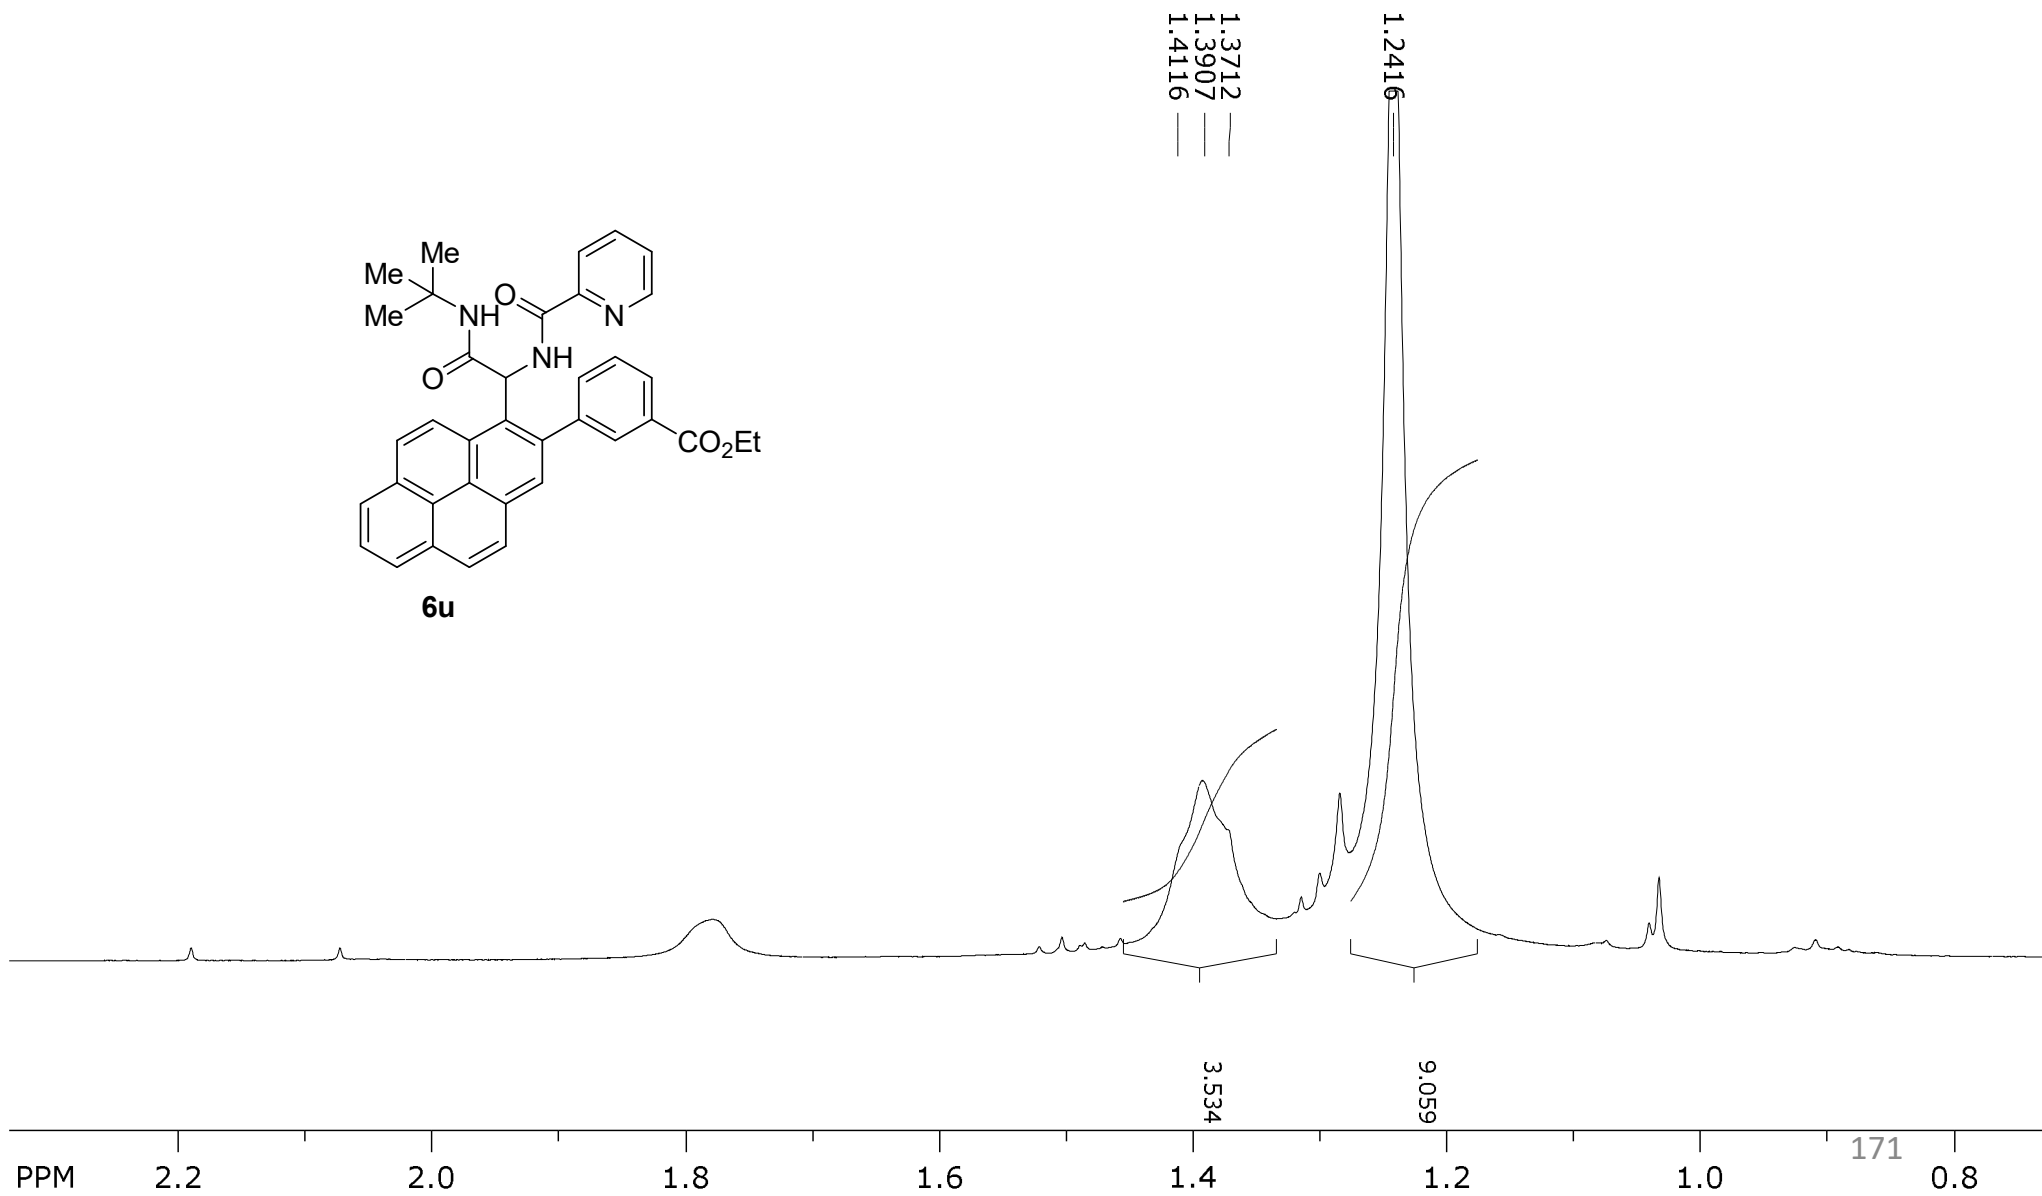

SpinWorks 4: AD-2114R-I  
C13CPD256 CDCl3 /opt/topspin3.5pl2/nmrdata nmrsu 48

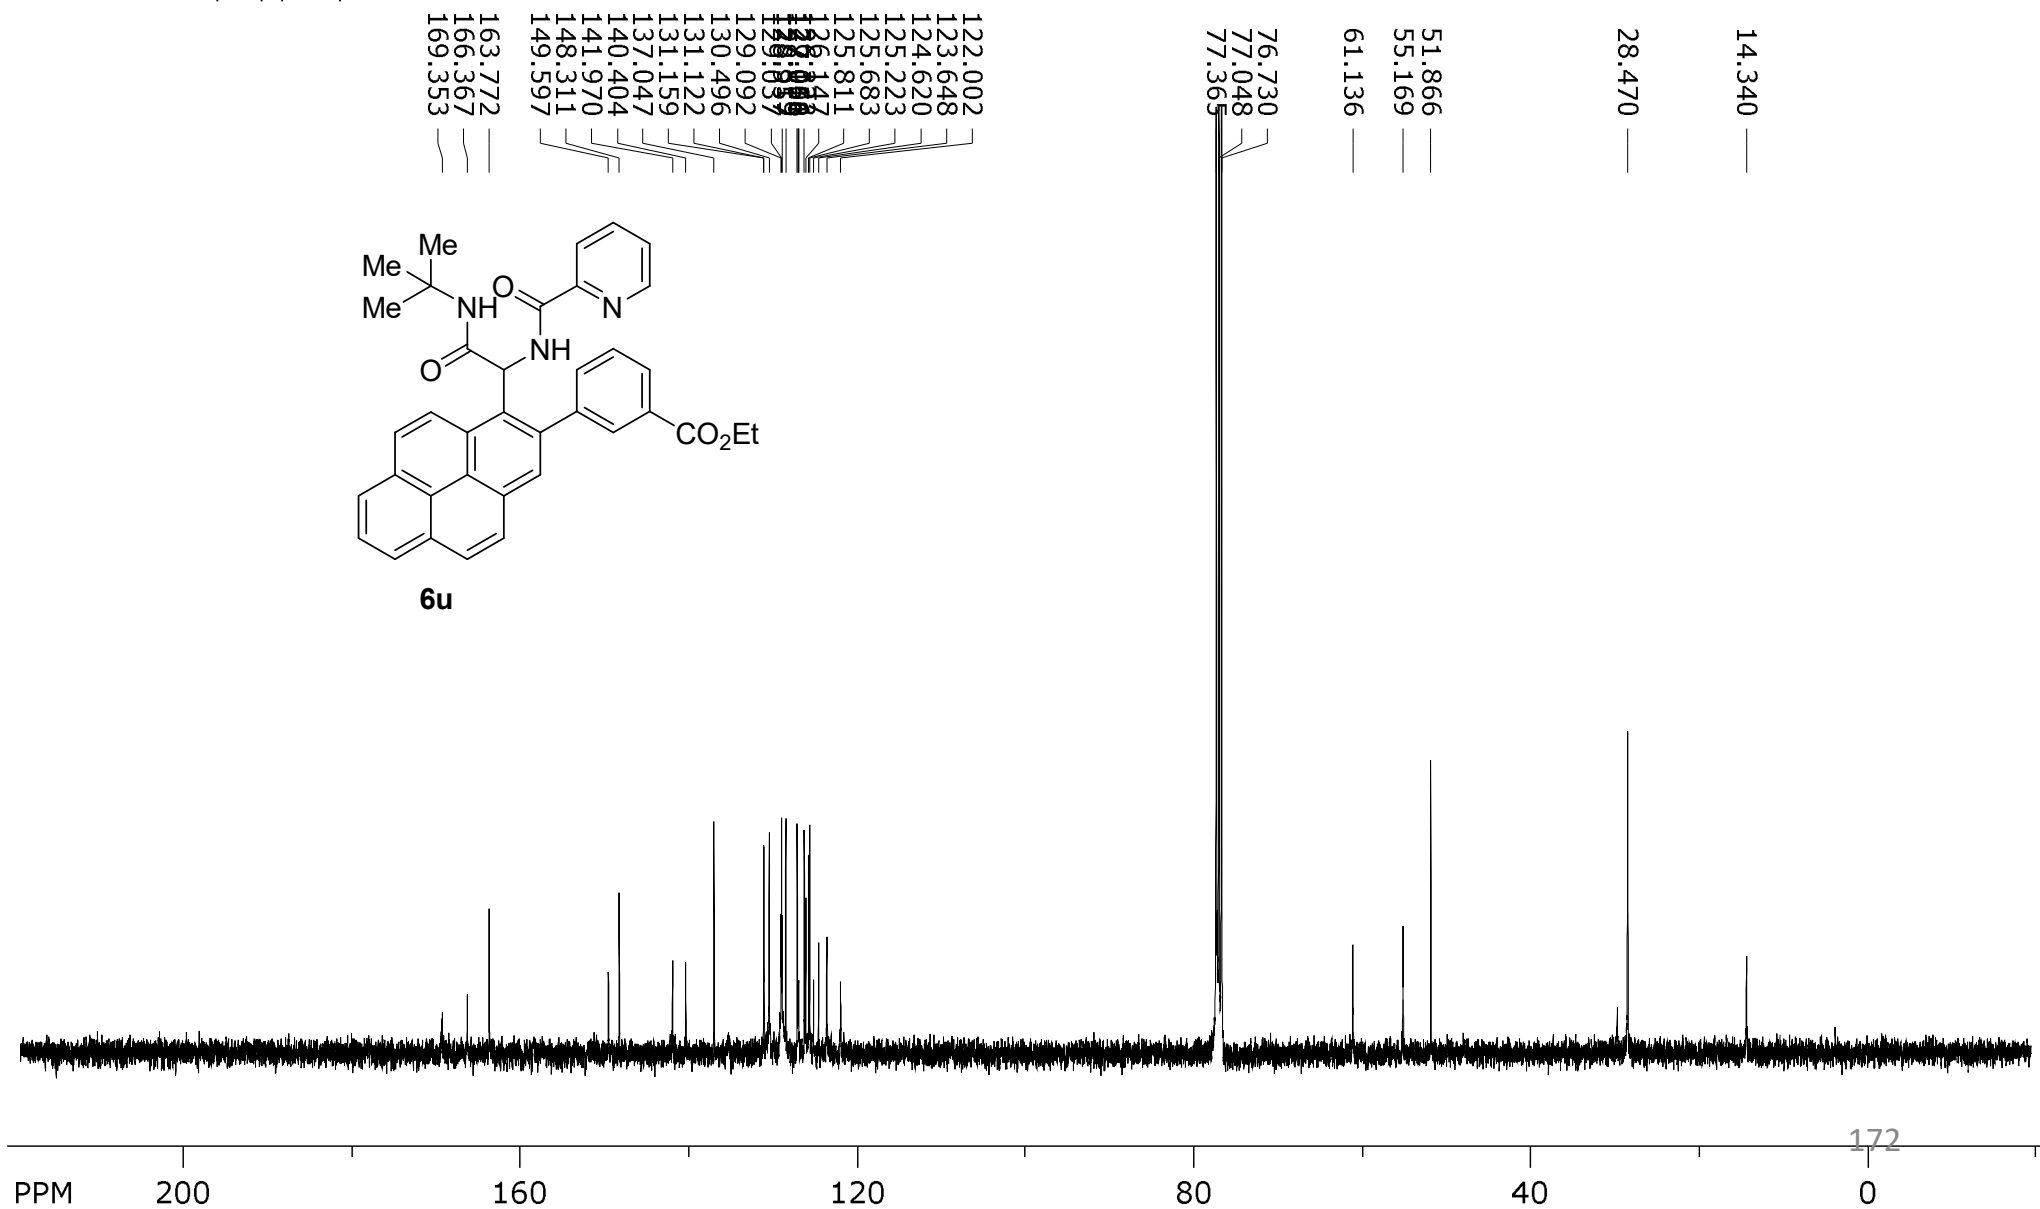

SpinWorks 4: AD-2114R-I  
C13CPD256 CDCl3 /opt/topspin3.5pl2/nmrdata nmrsu 48

149.597 —  
148.311 —  
141.970 —  
140.404 —  
137.047 —  
131.159 —  
131.122 —  
130.496 —  
129.092 —  
129.037 —  
128.957 —  
128.519 —  
127.156 —  
127.058 —  
127.016 —  
127.001 —  
126.323 —  
126.147 —  
125.811 —  
125.683 —  
125.223 —  
124.620 —  
123.648 —  
122.002 —

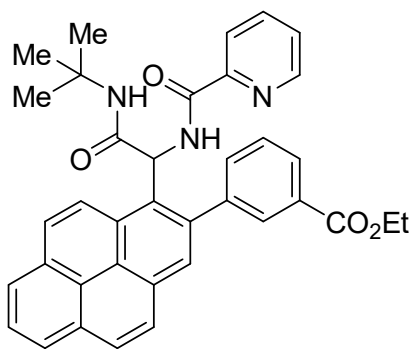

6u

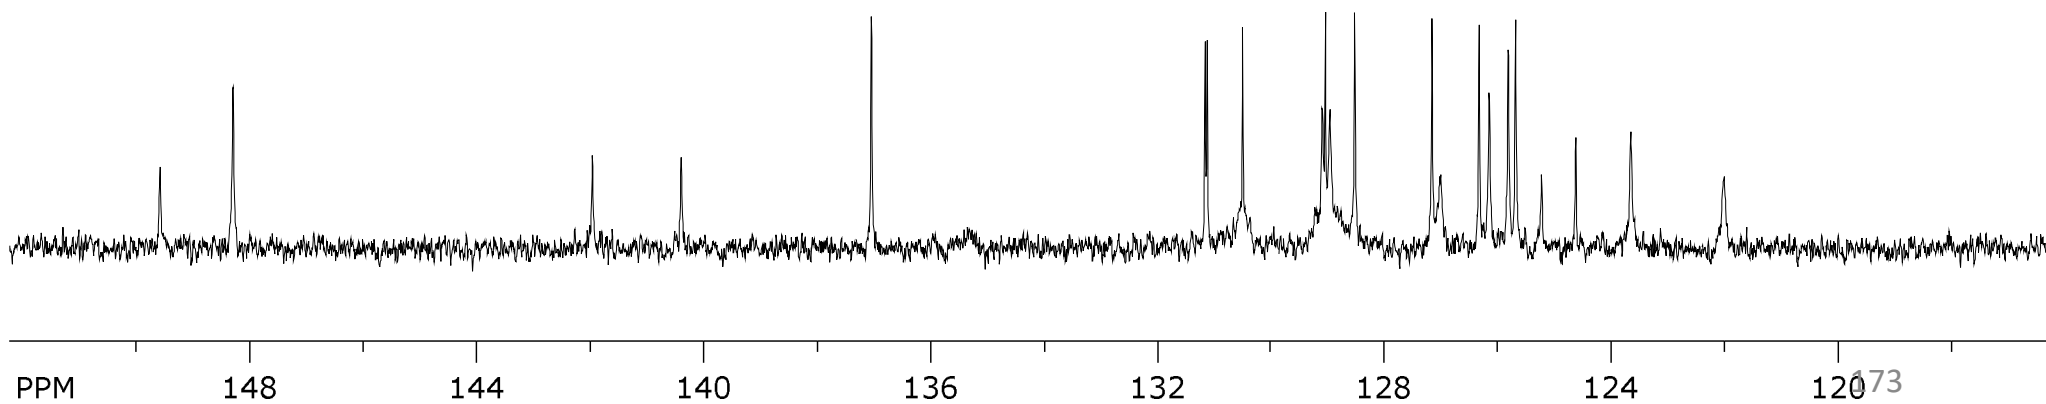

SpinWorks 4: AD 2071  
PROTON CDCl3 /opt/topspin3.5pl2/nmrdata nmrsu 16

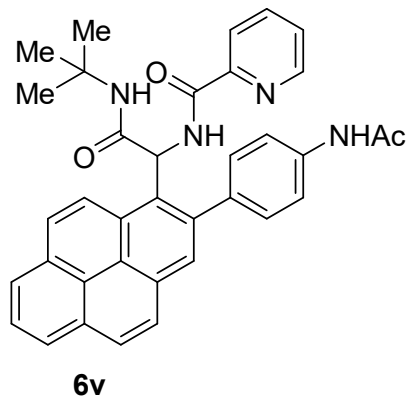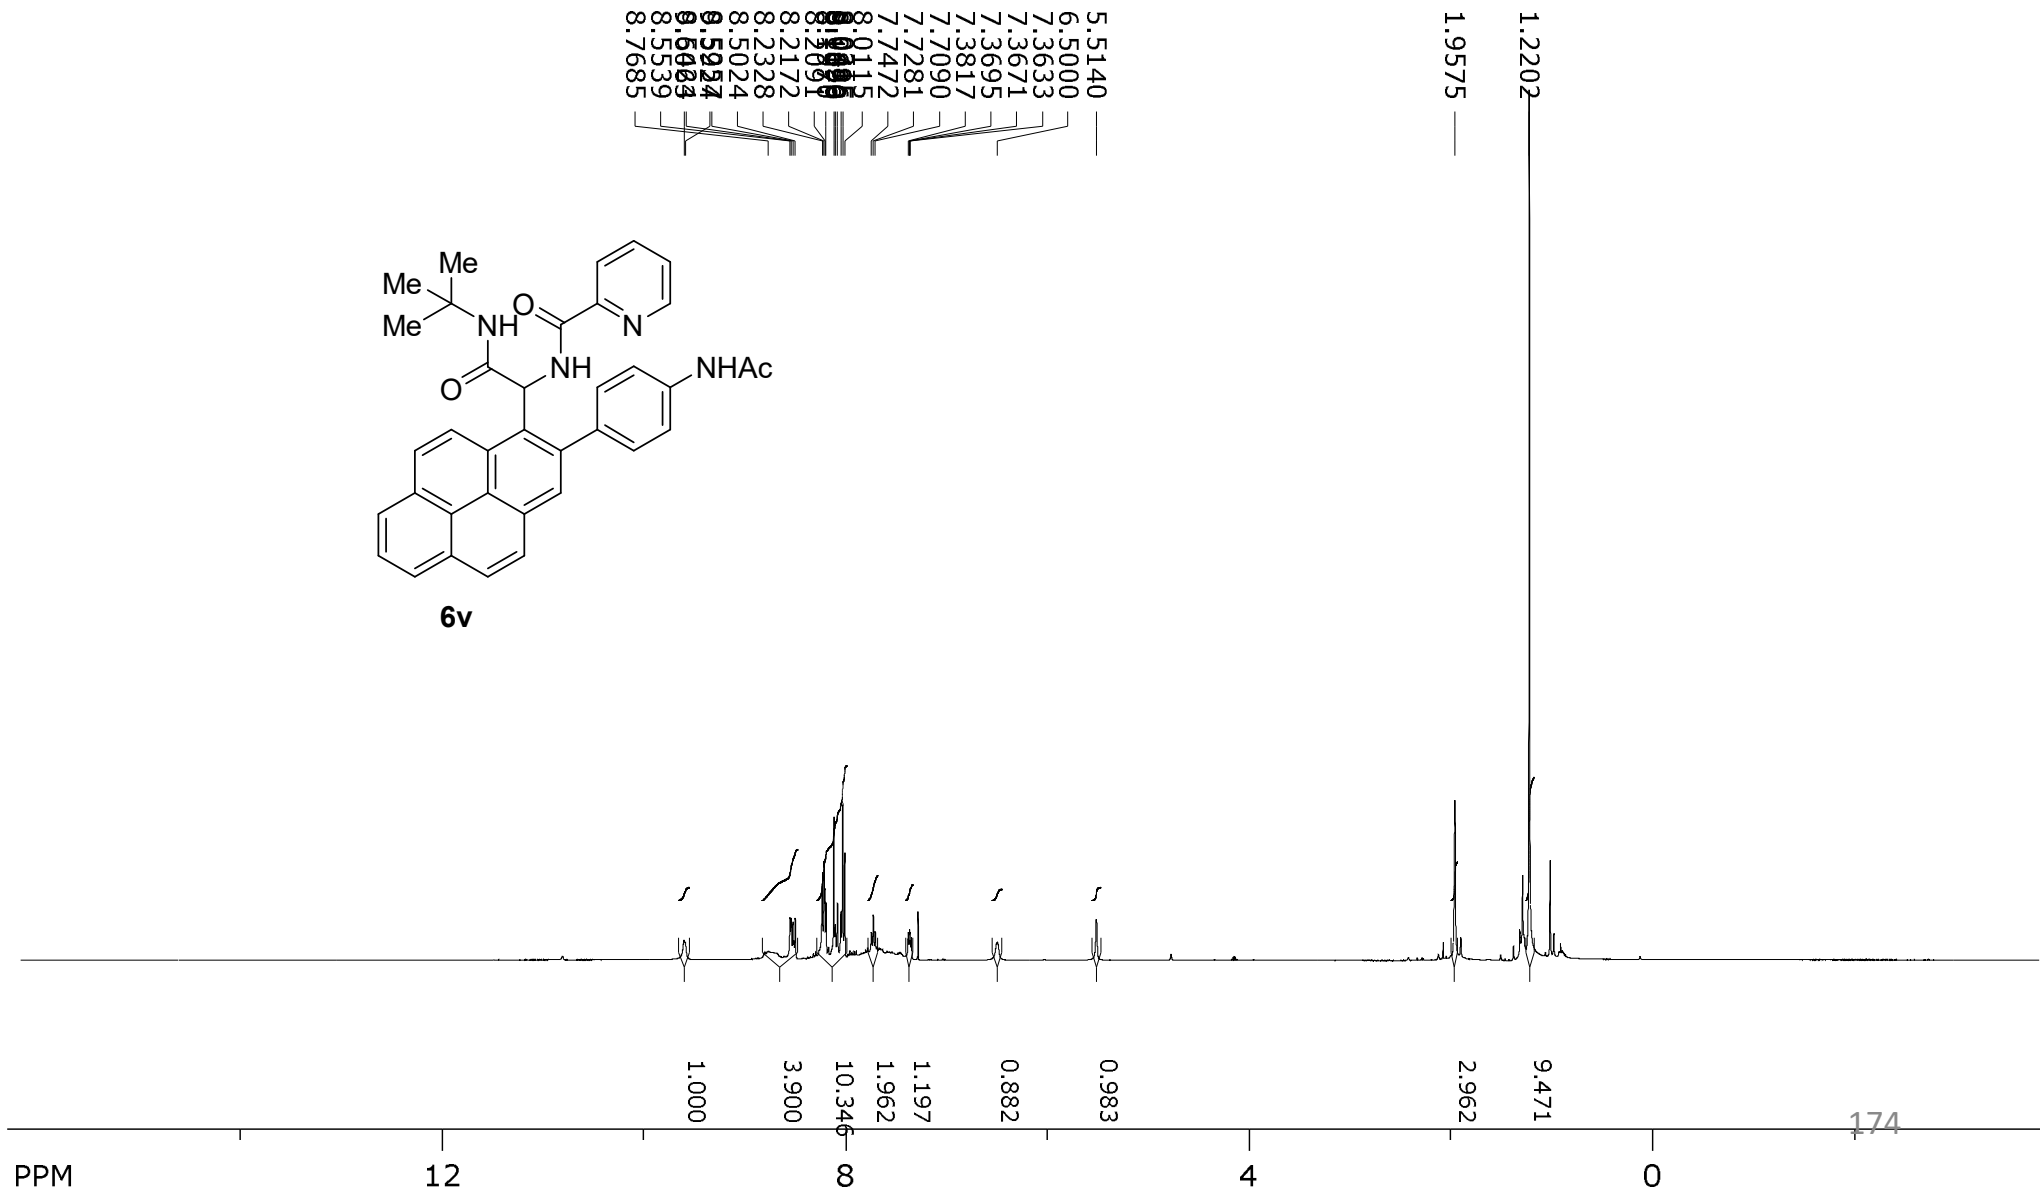

SpinWorks 4: AD 2071  
PROTON CDCl3 /opt/topspin3.5pl2/nmrdata nmrsu 16

9.5924  
9.6063

8.7685

8.5024  
8.5257  
8.5424  
8.5539

8.1970  
8.2091  
8.2172  
8.2328

8.0115  
8.0315  
8.0495  
8.0826  
8.1050  
8.1196

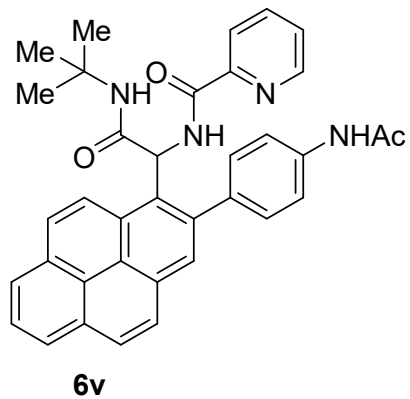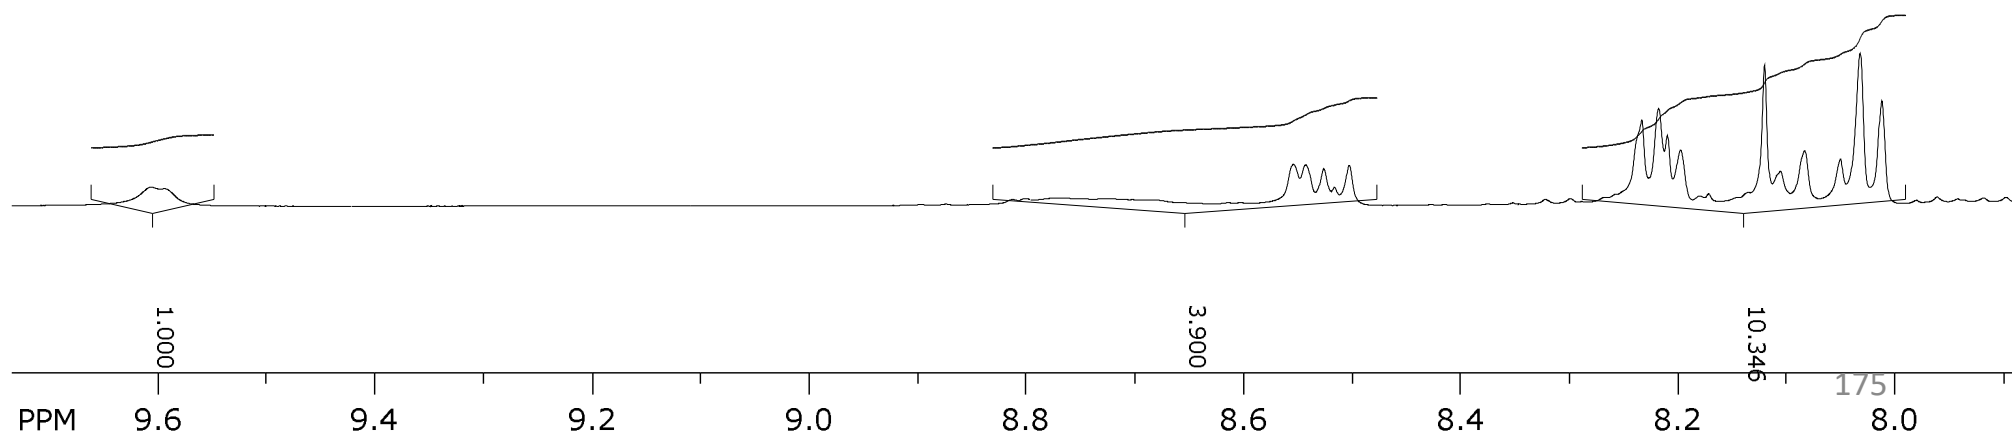

SpinWorks 4: AD 2071  
PROTON CDCl3 /opt/topspin3.5pl2/nmrdata nmrsu 16

7.7090  
7.7281  
7.7472

7.3633  
7.3671  
7.3695  
7.3817

6.5000

5.5140

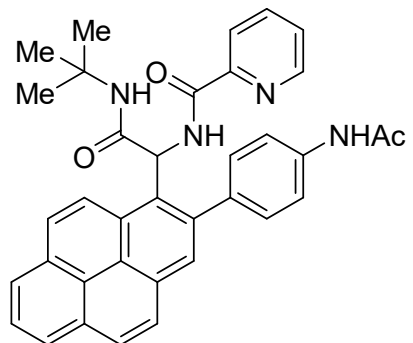

6v

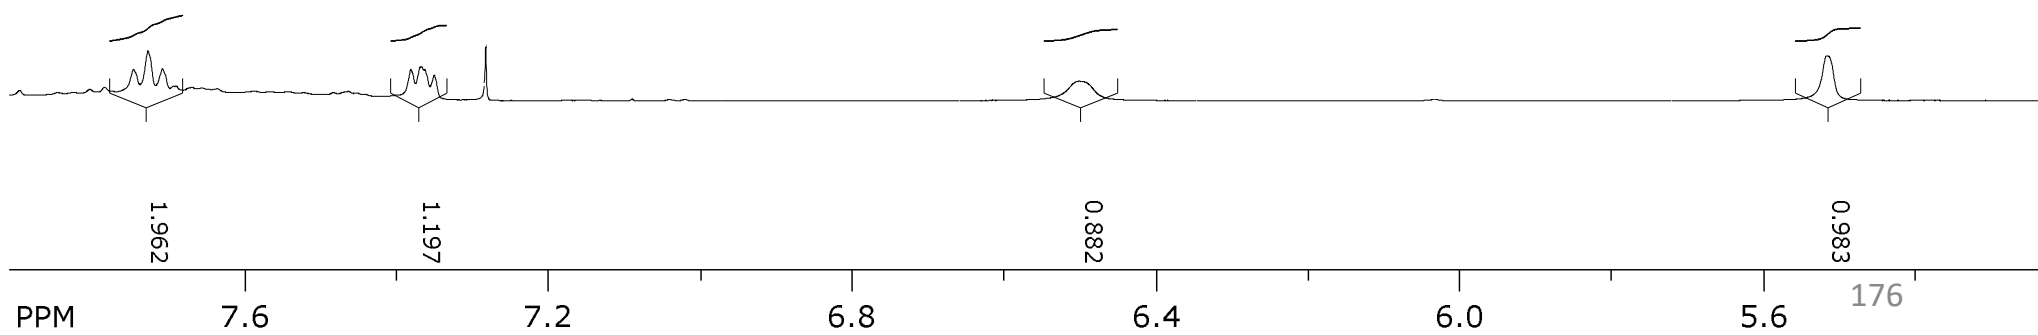



SpinWorks 4: AD 2071

C13CPD CDCl3 /opt/topspin3.5pl2/nmrdata nmrsu 16

119.672  
121.975  
123.517  
124.622  
124.969  
125.666  
125.847  
125.889  
125.908  
125.927  
130.412  
131.121  
131.169  
136.687  
137.255  
138.477  
138.498  
141.139  
148.429  
149.315  
164.032  
169.283  
169.637

76.780  
77.098  
77.416

51.929  
55.207

24.290  
28.481

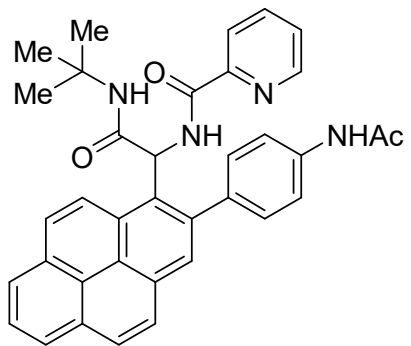

6v

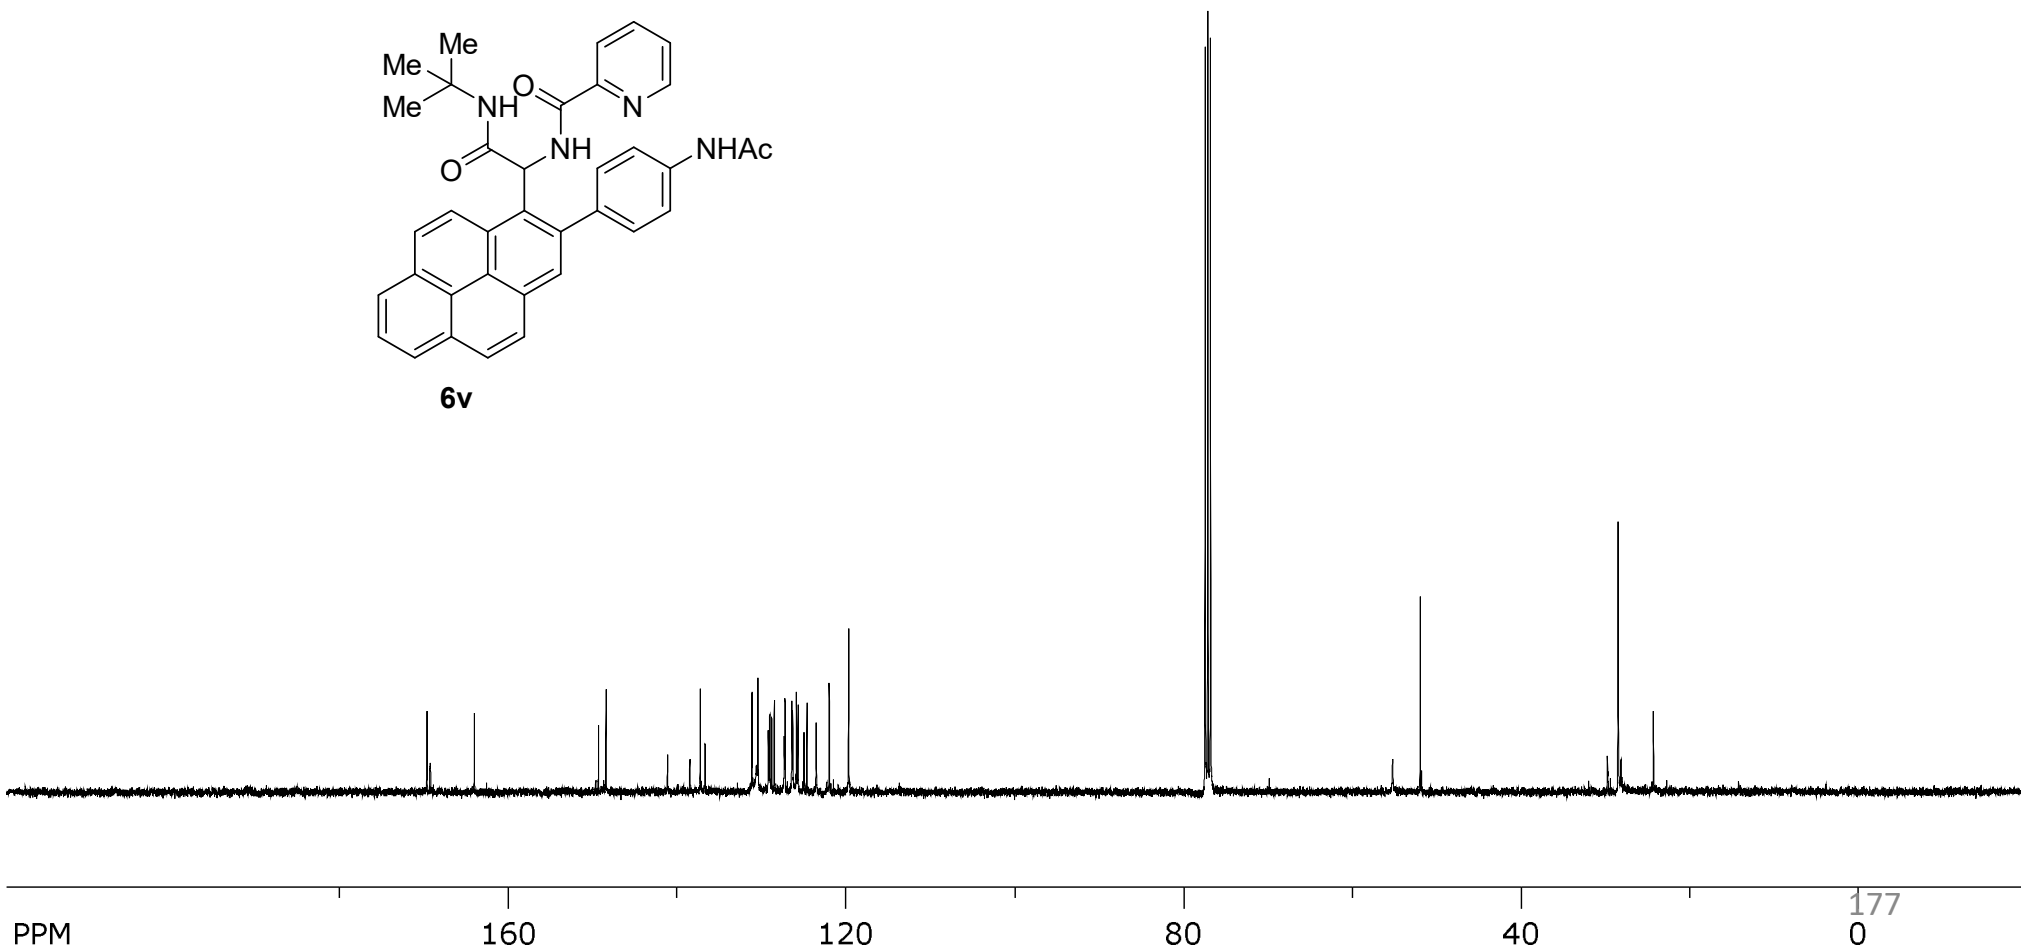

SpinWorks 4: AD 2071  
C13CPD CDCl3 /opt/topspin3.5pl2/nmrdata nmrsu 16

149.315 —  
148.429 —  
141.139 —  
138.477 —  
138.498 —  
137.255 —  
136.687 —  
131.121 —  
131.169 —  
130.412 —  
129.186 —  
129.022 —  
128.797 —  
128.487 —  
127.307 —  
127.209 —  
126.389 —  
126.303 —  
125.847 —  
125.666 —  
124.969 —  
124.622 —  
123.517 —  
121.975 —  
119.672 —

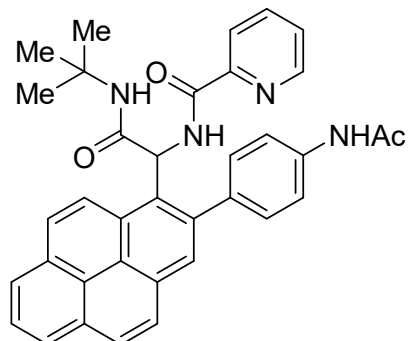

6v

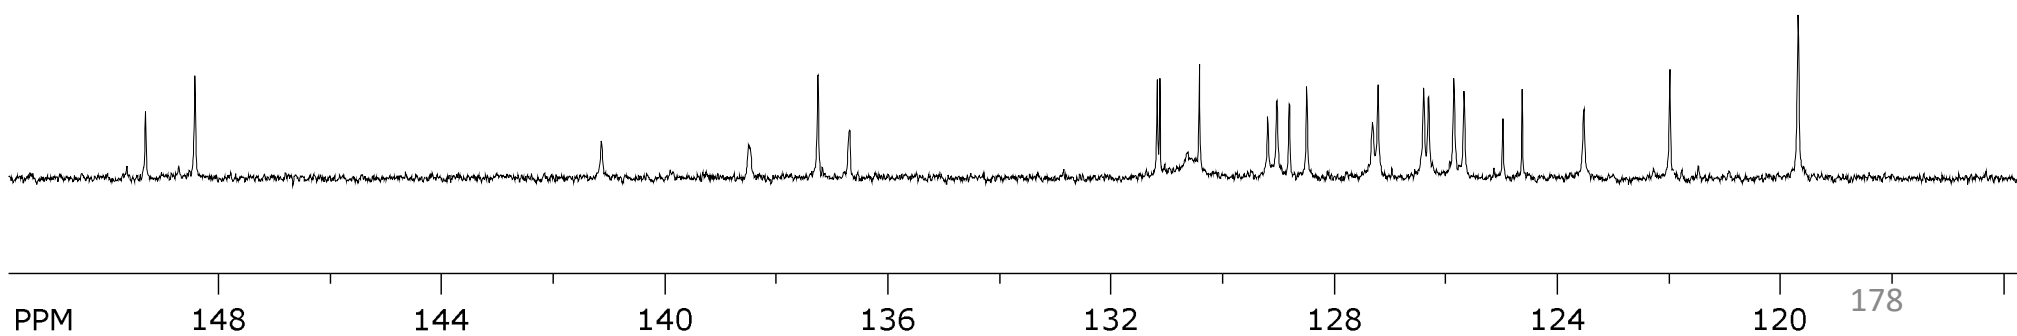

SpinWorks 4: AD-1858  
PROTON CDCl3 /opt/topspin3.5pl2/nmrdata nmrsu 12

9.6677  
9.6797  
8.5974  
8.5875  
8.5734  
8.2382  
8.2106  
8.1318  
8.1095  
8.0969  
7.8589  
7.8589  
7.8589  
7.8589  
7.8589  
7.3771  
7.3730  
7.3706  
7.3609  
7.3584  
7.2830  
6.4807  
6.4946  
5.5602

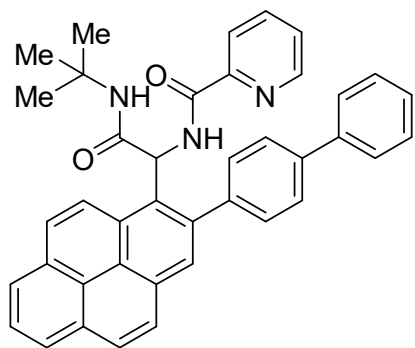

6w

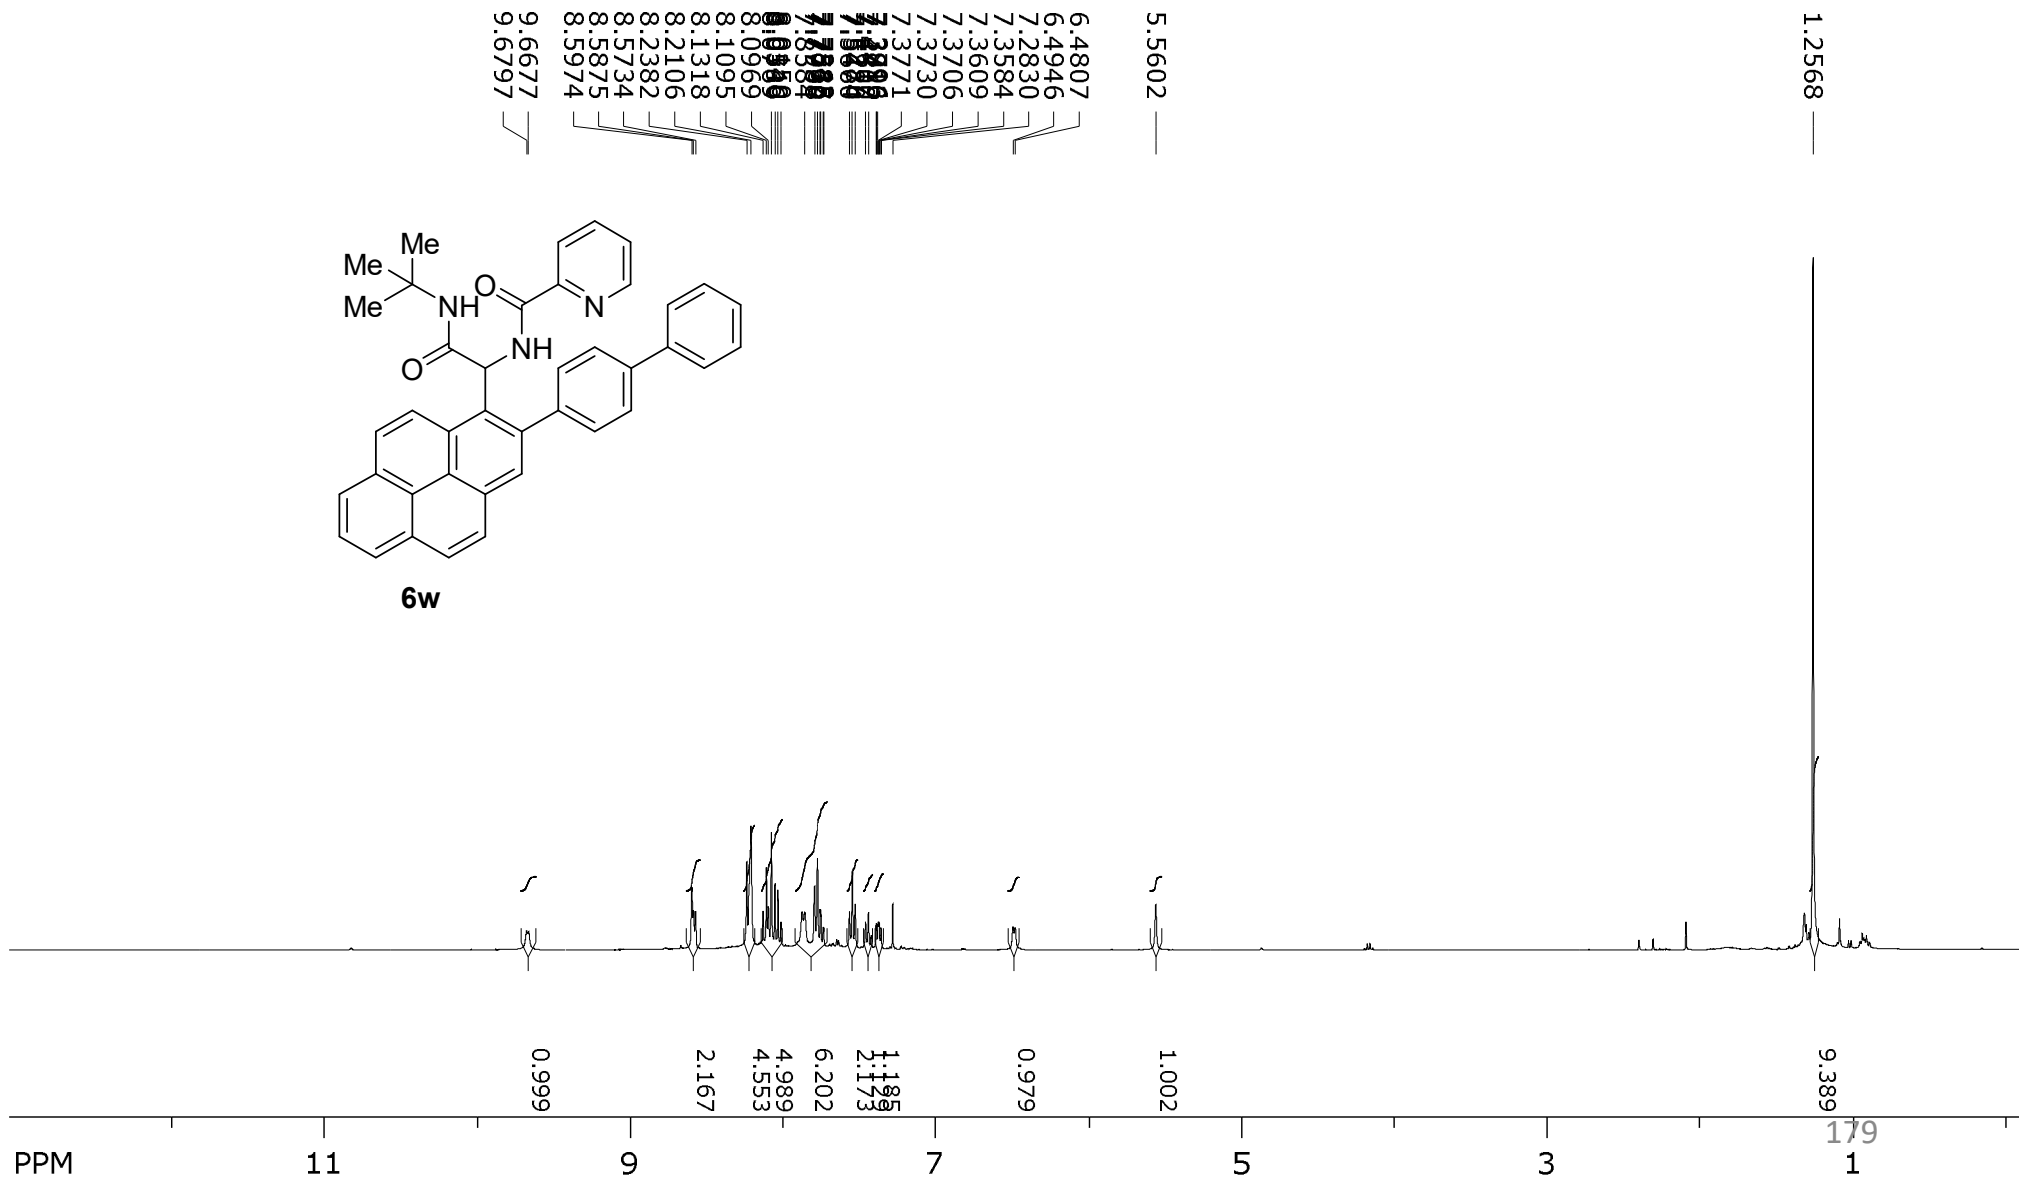

SpinWorks 4: AD-1858  
 PROTON CDCl3 /opt/topspin3.5pl2/nmrdata nmrsu 12

|        |        |        |        |        |        |
|--------|--------|--------|--------|--------|--------|
| 8.5734 | 8.2106 | 8.0150 | 7.7342 | 7.5280 | 7.2830 |
| 8.5875 | 8.2382 | 8.0340 | 7.7383 | 7.5474 | 7.3584 |
| 8.5974 |        | 8.0536 | 7.7535 | 7.5660 | 7.3609 |
|        |        | 8.0769 | 7.7575 |        | 7.3706 |
|        |        | 8.0969 | 7.7760 |        | 7.3730 |
|        |        | 8.1095 | 7.7938 |        | 7.3771 |
|        |        | 8.1318 |        |        | 7.3796 |
|        |        |        |        |        | 7.3893 |
|        |        |        |        |        | 7.3916 |
|        |        |        |        |        | 7.4417 |
|        |        |        |        |        | 7.4600 |
|        |        |        |        |        |        |
|        |        |        |        |        |        |
|        |        |        |        |        |        |
|        |        |        |        |        |        |
|        |        |        |        |        |        |
|        |        |        |        |        |        |
|        |        |        |        |        |        |
|        |        |        |        |        |        |
|        |        |        |        |        |        |
|        |        |        |        |        |        |
|        |        |        |        |        |        |
|        |        |        |        |        |        |
|        |        |        |        |        |        |

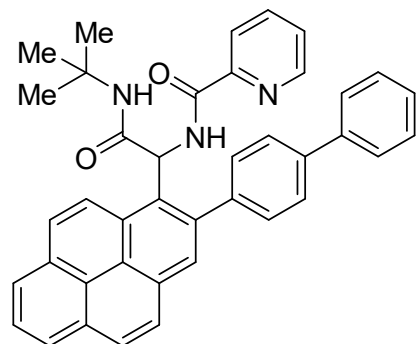

6w

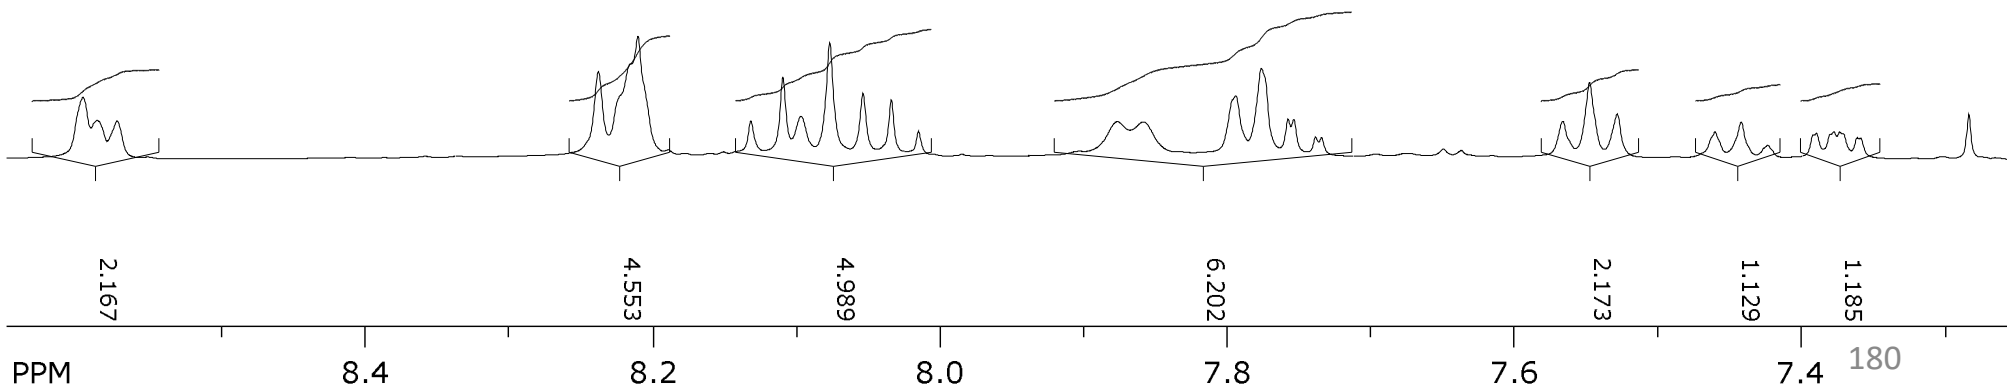

SpinWorks 4: AD-1858  
PROTON CDCl3 /opt/topspin3.5pl2/nmrdata nmrsu 12

6.4807  
6.4946

5.5602

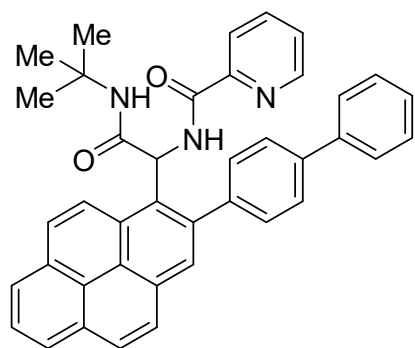

**6w**

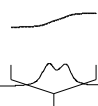

0.979

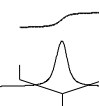

1.002

PPM

6.6

6.4

6.2

6.0

5.8

5.6

5.4

181

5.2

SpinWorks 4: AD-1858

C13CPD256 CDCl3 /opt/topspin3.5pl2/nmrdata nmrsu 12

122.013  
123.800  
124.629  
125.082  
125.546  
125.666  
126.188  
126.188  
129.186  
129.186  
130.439  
131.059  
131.103  
137.051  
140.567  
140.618  
140.743  
140.913  
148.285  
149.631  
163.754  
169.476

76.742  
77.060  
77.378

51.791  
55.270

28.479

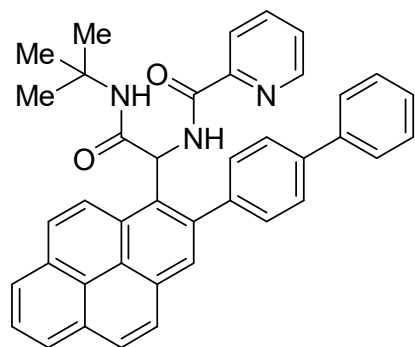

6w

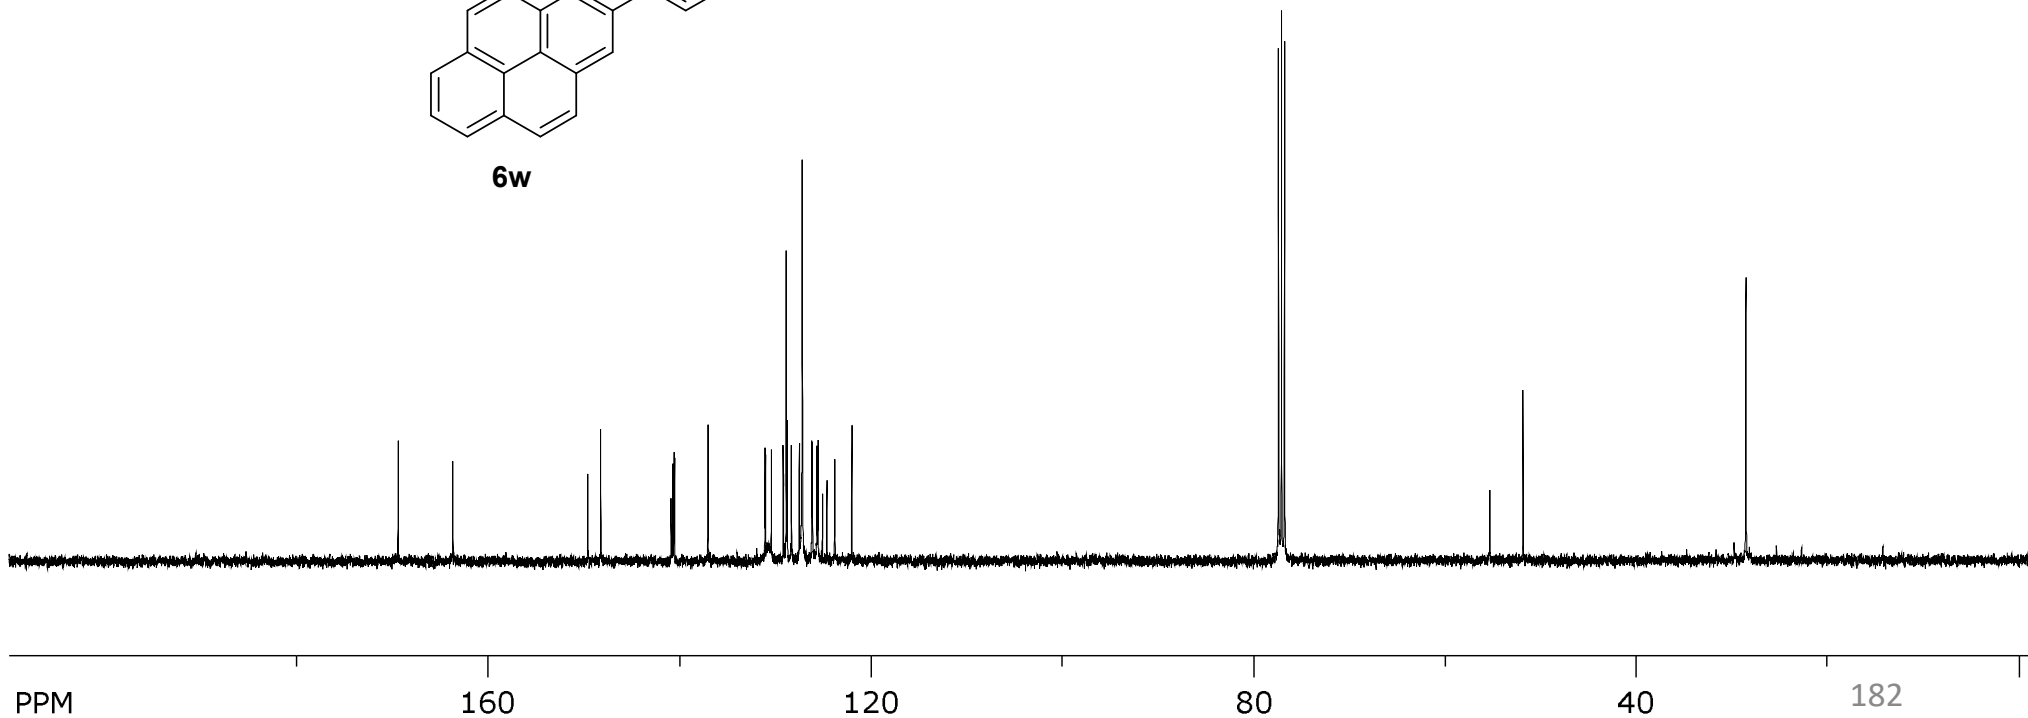

SpinWorks 4: AD-1858  
C13CPD256 CDCl3 /opt/topspin3.5pl2/nmrdata nmrsu 12

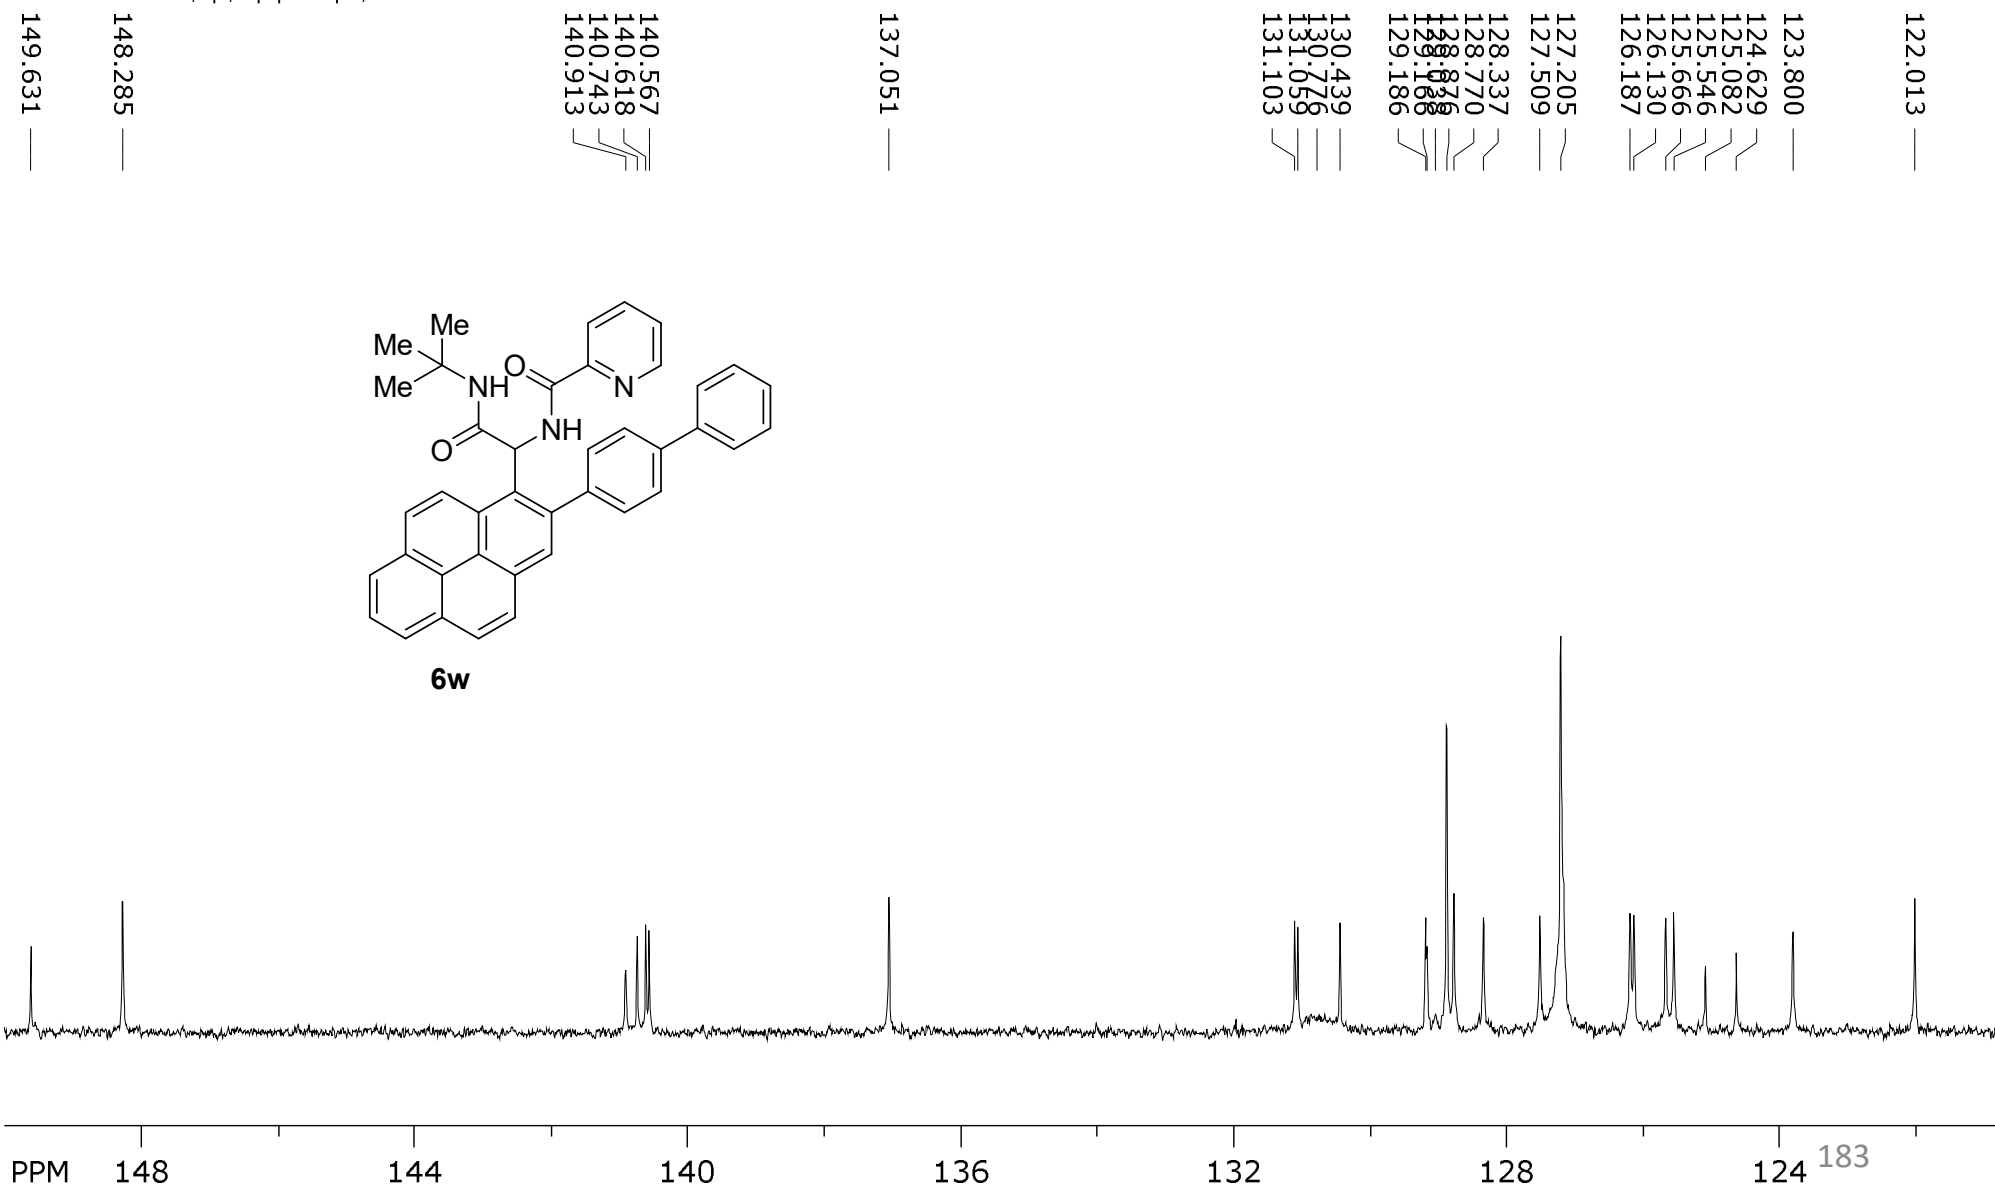

SpinWorks 4: AD-1816  
PROTON CDCl3 /opt/topspin3.5pl2/nmrdata nmrsu 28

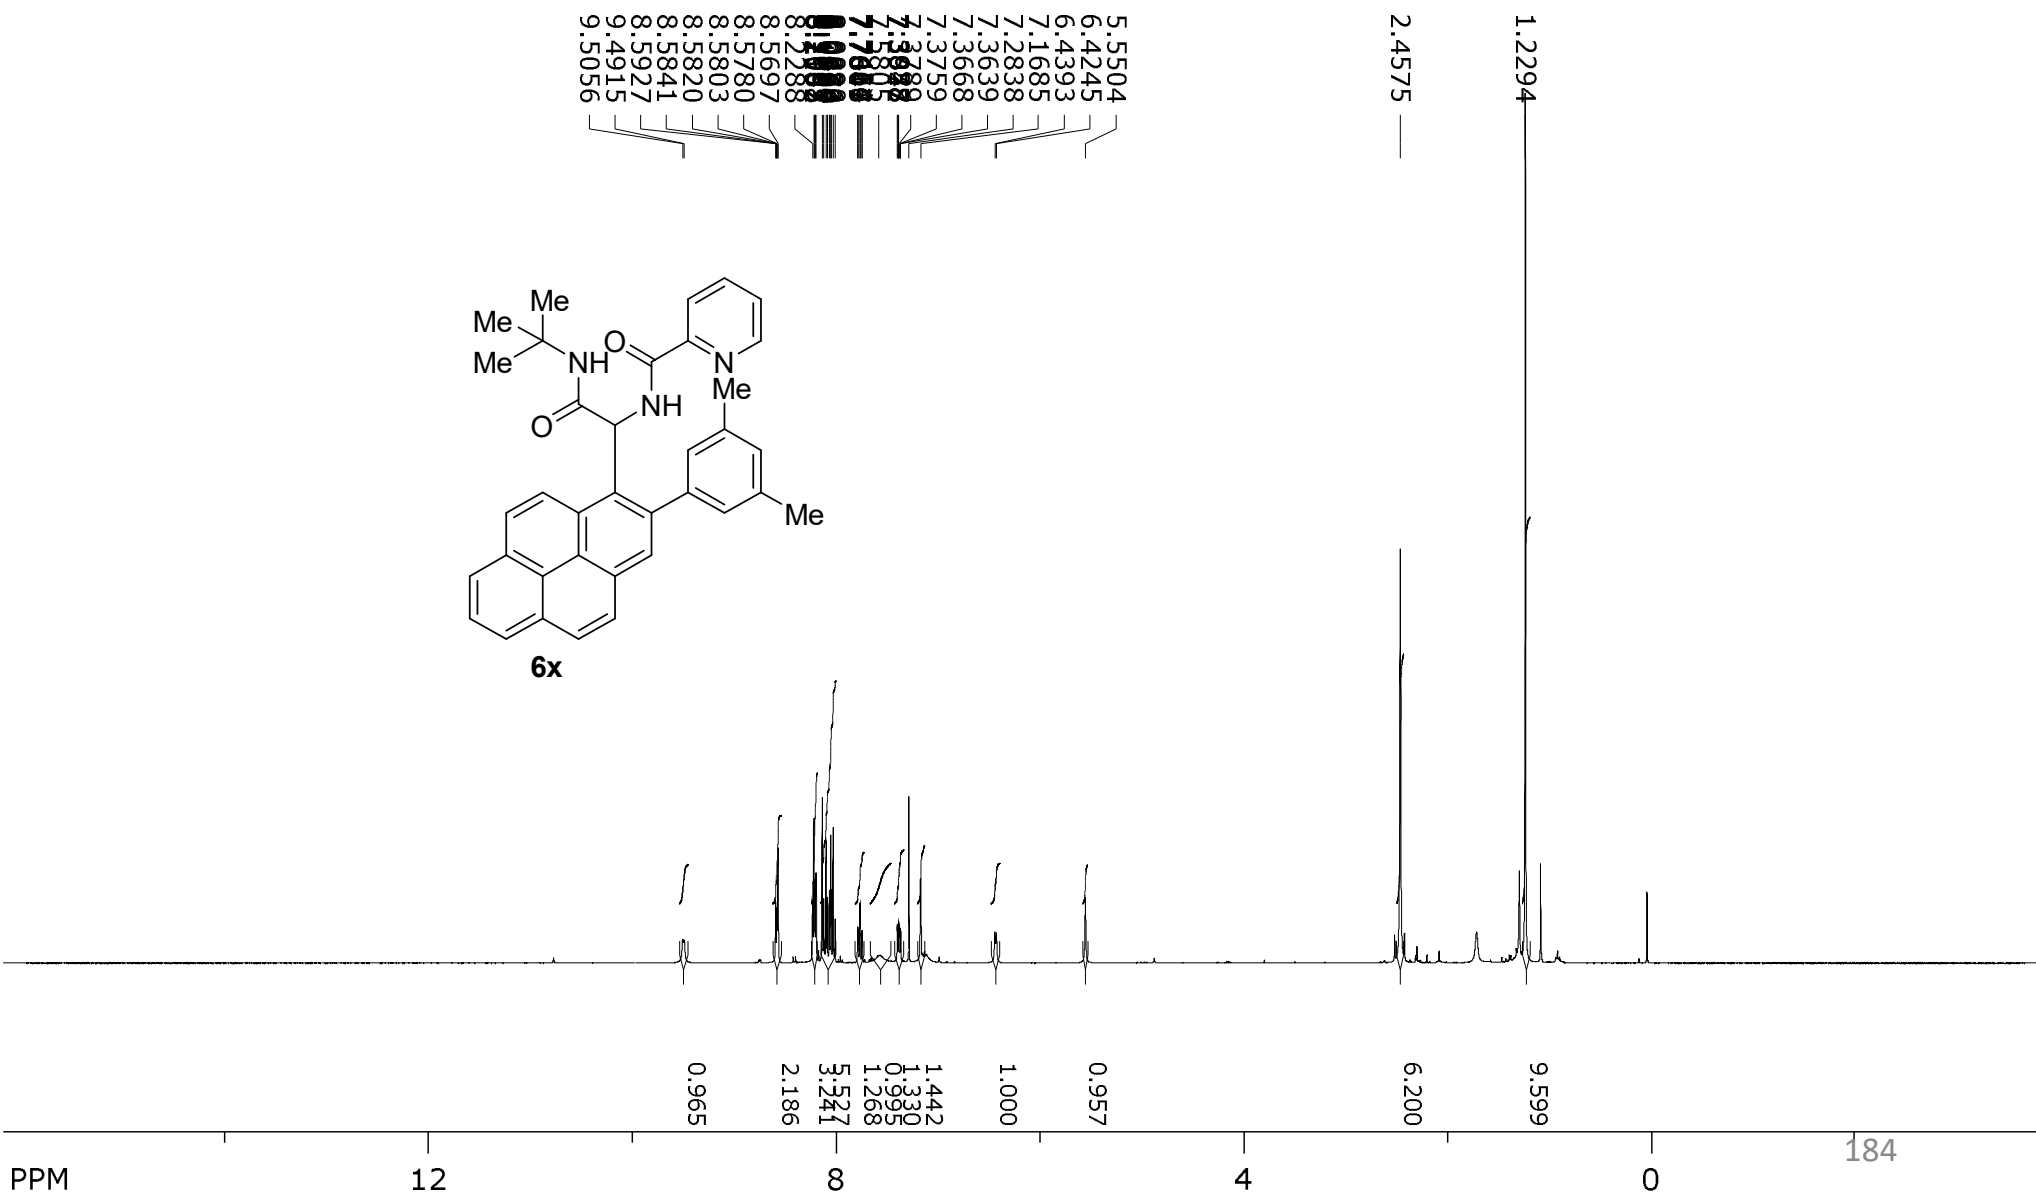



SpinWorks 4: AD-1816  
PROTON CDCl3 /opt/topspin3.5pl2/nmrdata nmrsu 28

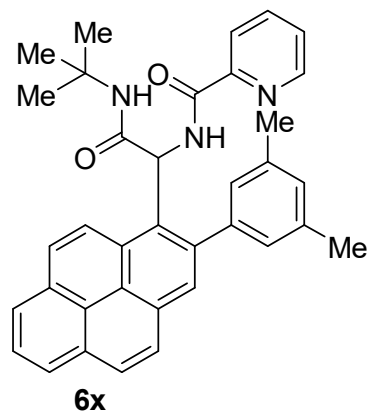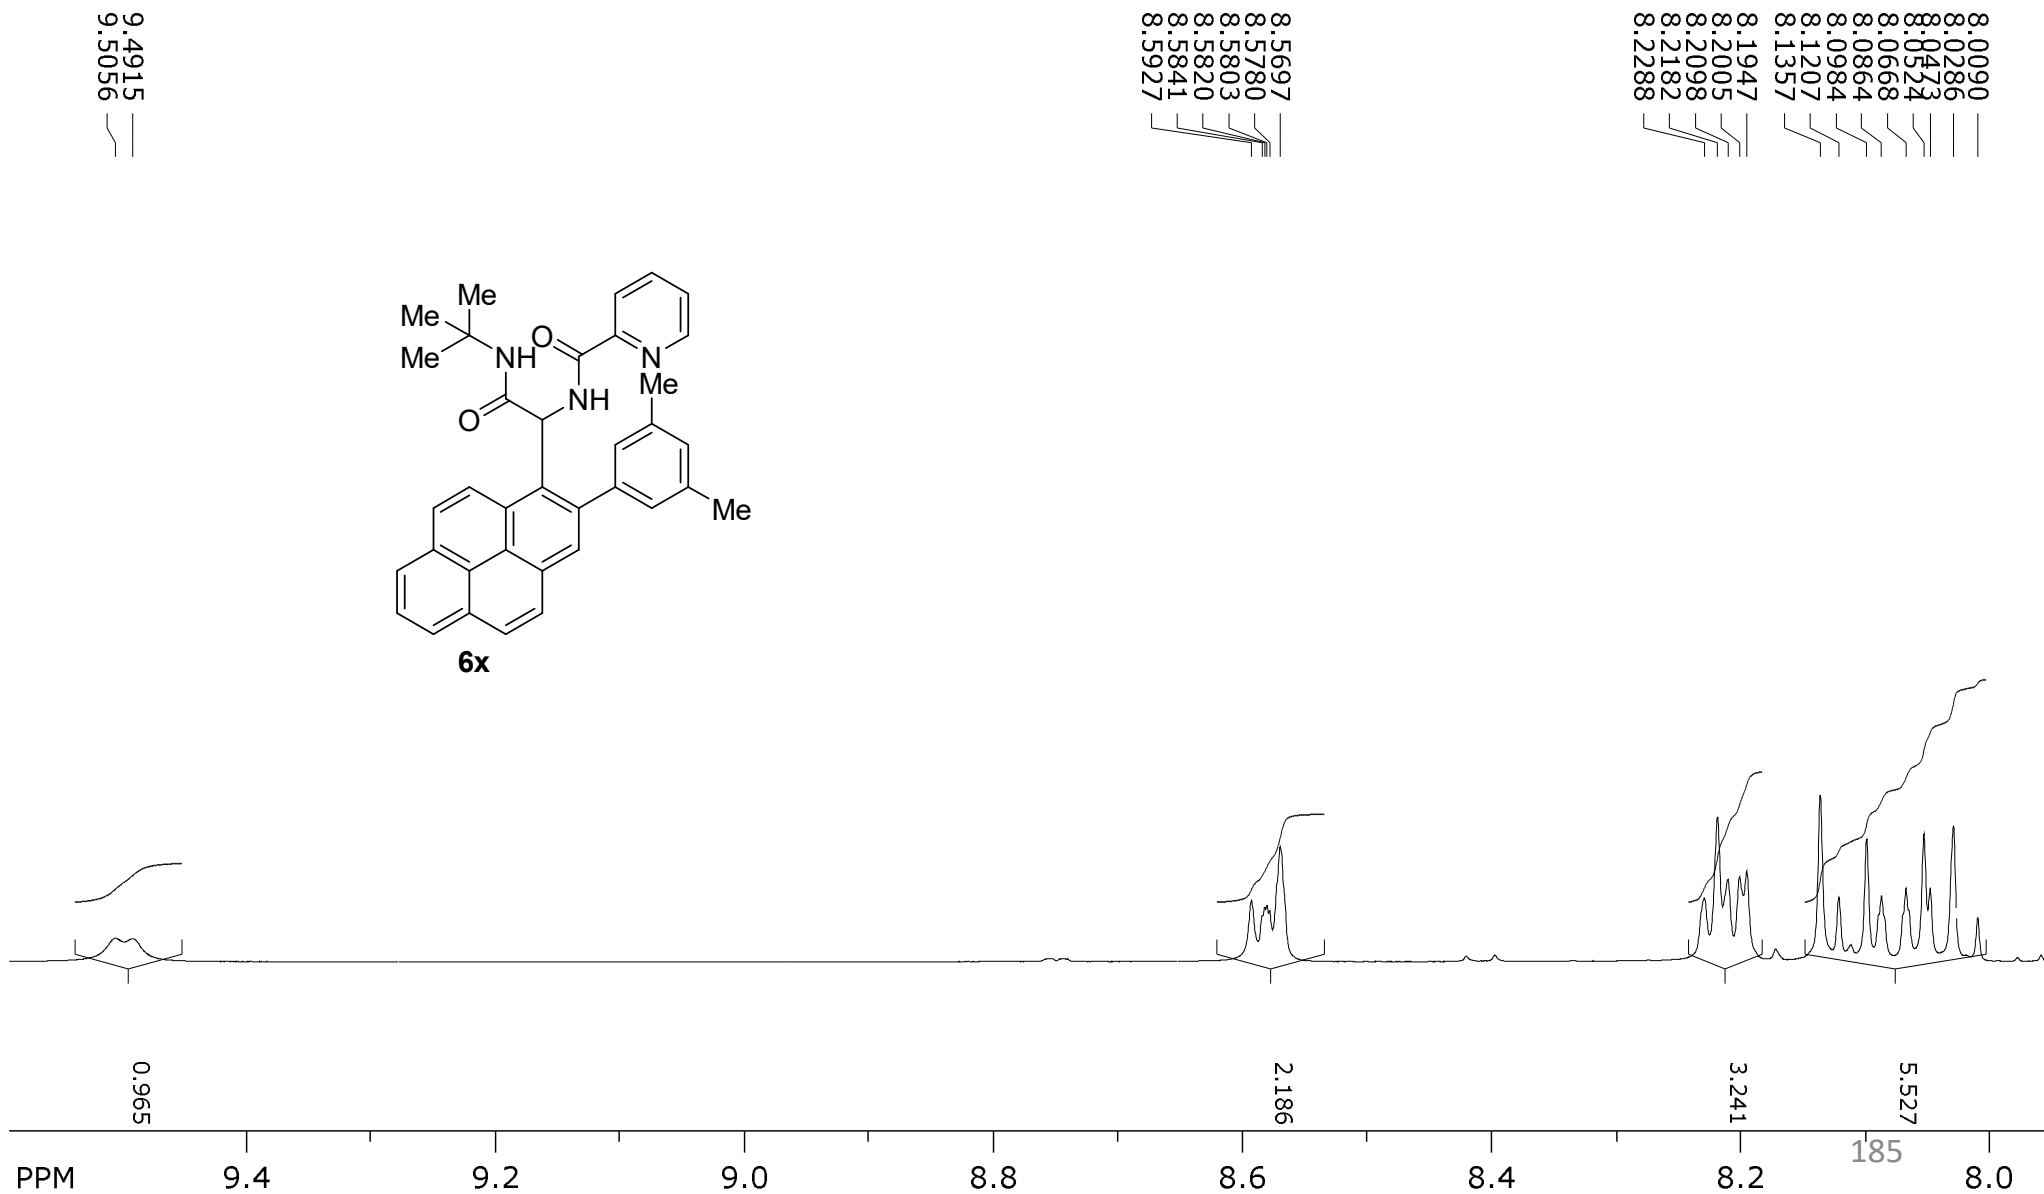

SpinWorks 4: AD-1816  
PROTON CDCl3 /opt/topspin3.5pl2/nmrdata nmrsu 28

7.7421  
7.7464  
7.7615  
7.7657  
7.7806  
7.7849

7.5805

7.3639  
7.3668  
7.3759  
7.3789  
7.3828  
7.3857  
7.3948  
7.3977

7.2838

7.1685

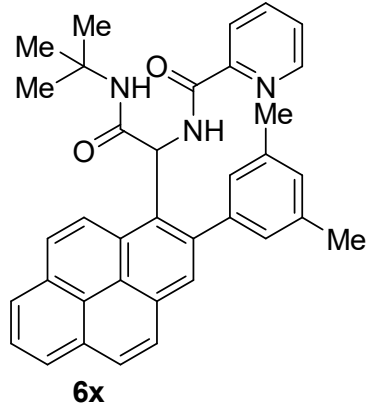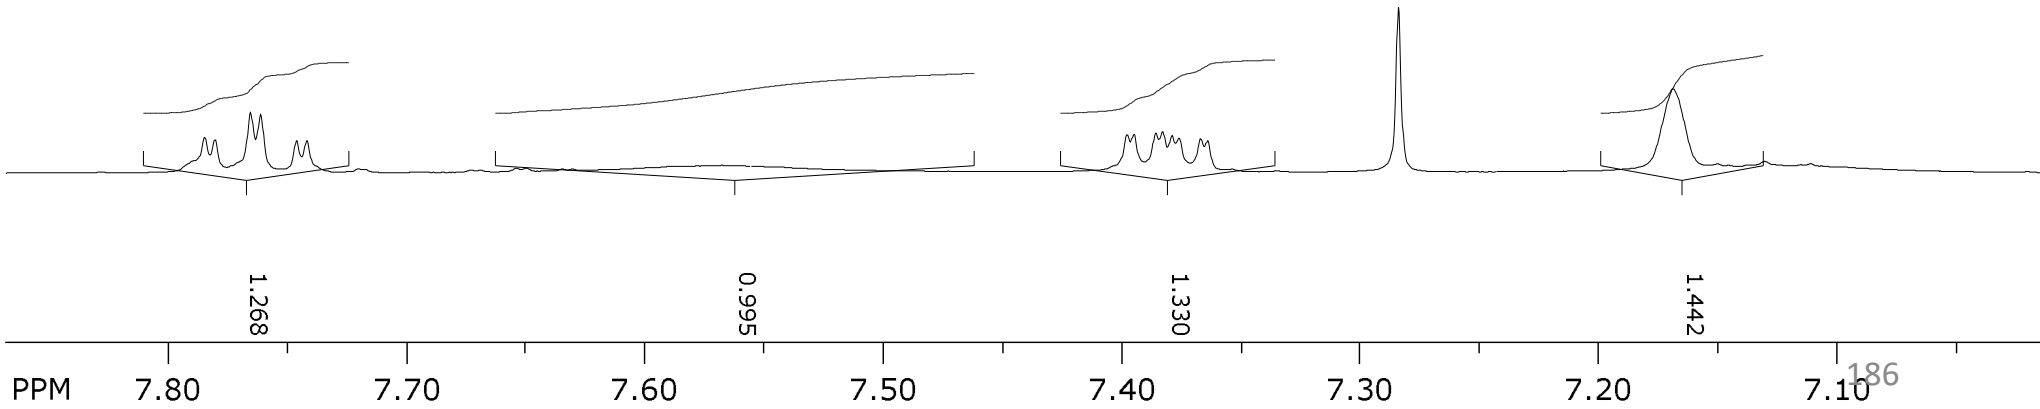

SpinWorks 4: AD-1816  
PROTON CDCl3 /opt/topspin3.5pl2/nmrdata nmrsu 28

6.4245  
6.4393

5.5504

2.4575

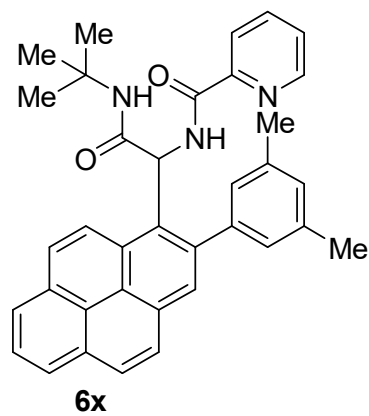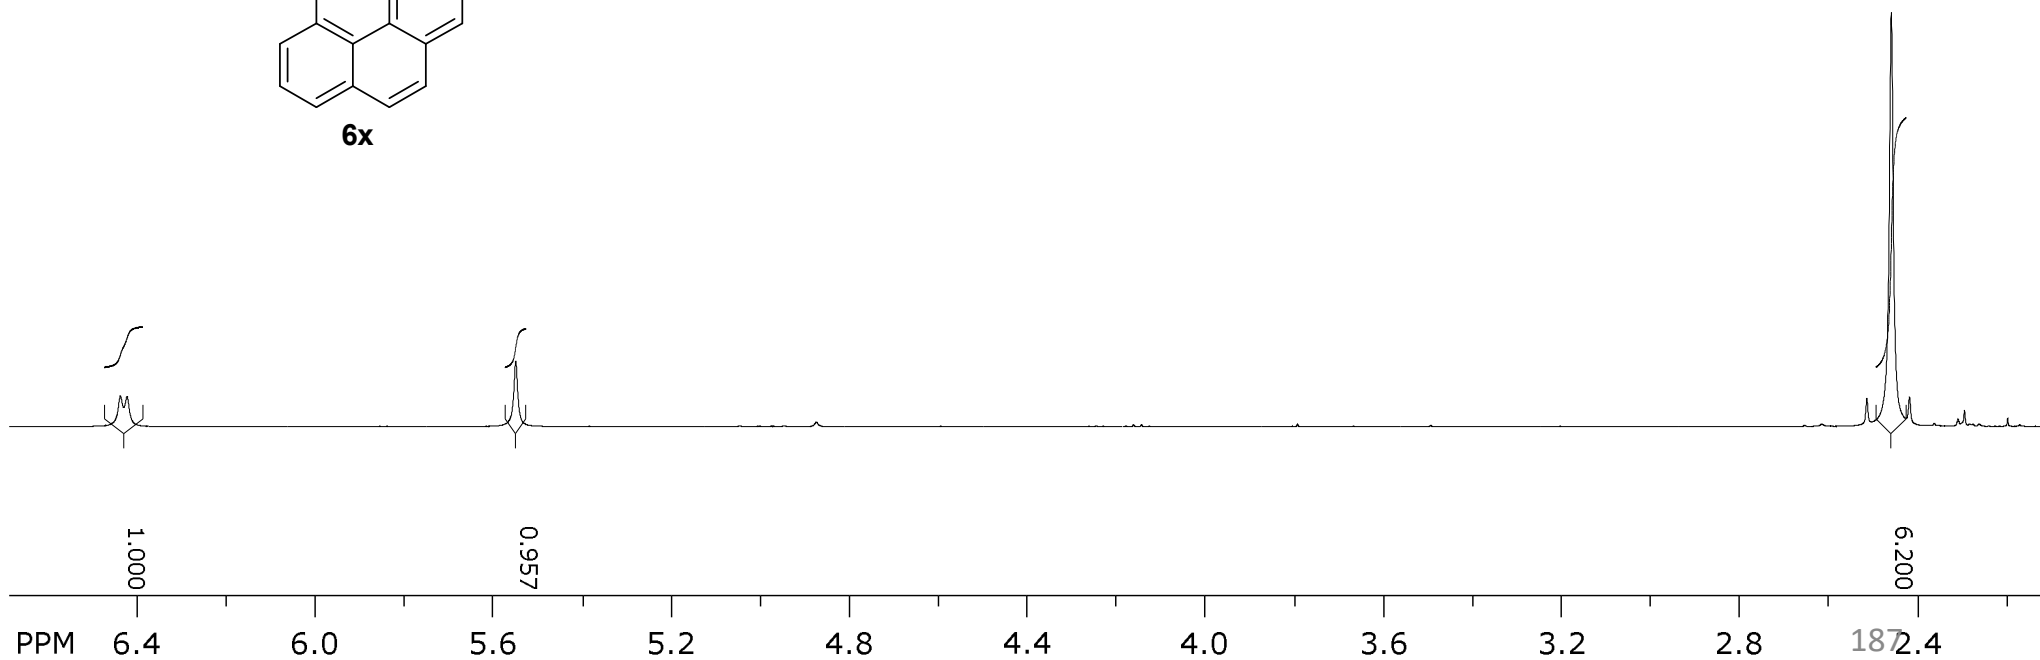

SpinWorks 4: AD-1816  
C13CPD256 CDCl3 /opt/topspin3.5pl2/nmrdata nmrsu 3

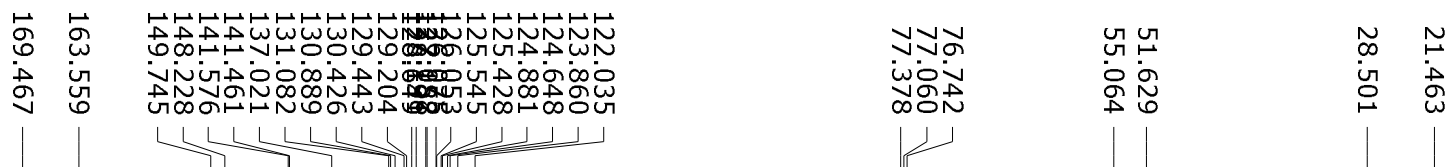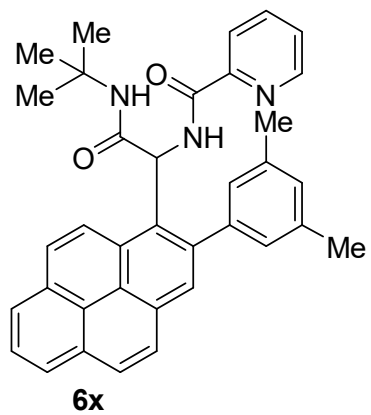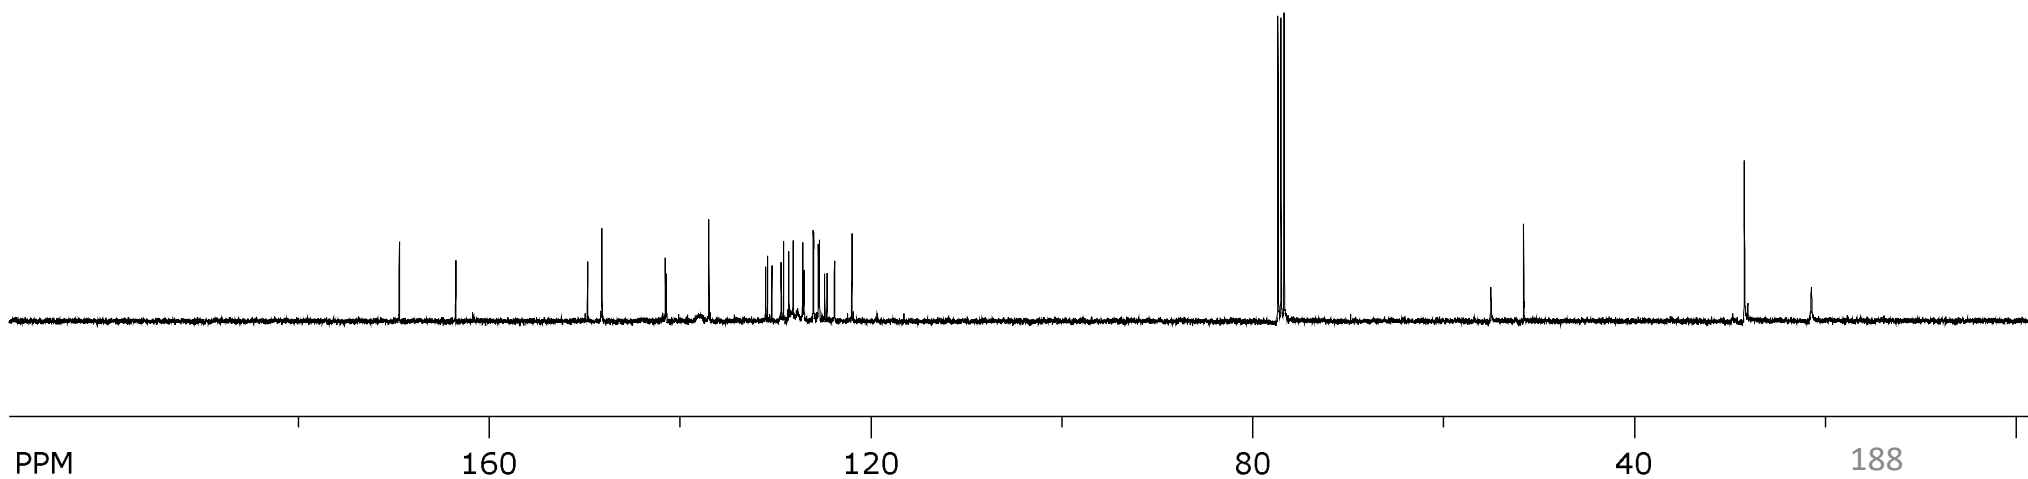

SpinWorks 4: AD-1816  
C13CPD256 CDCl3 /opt/topspin3.5pl2/nmrdata nmrsu 3

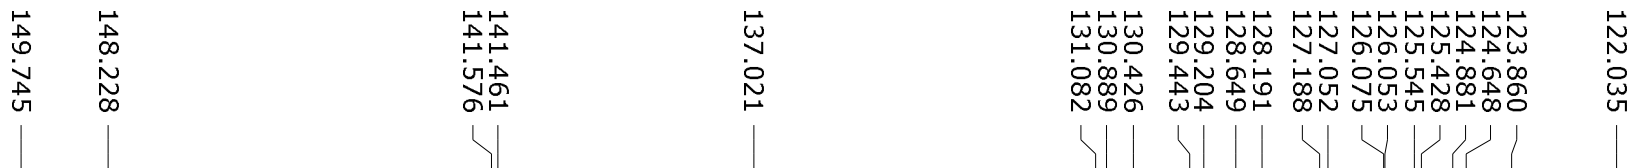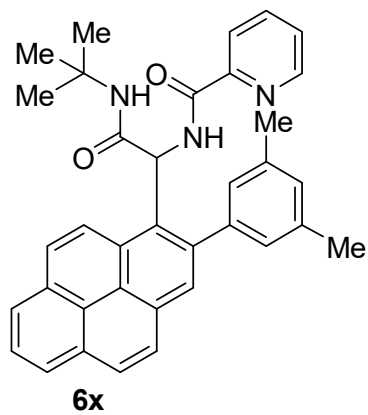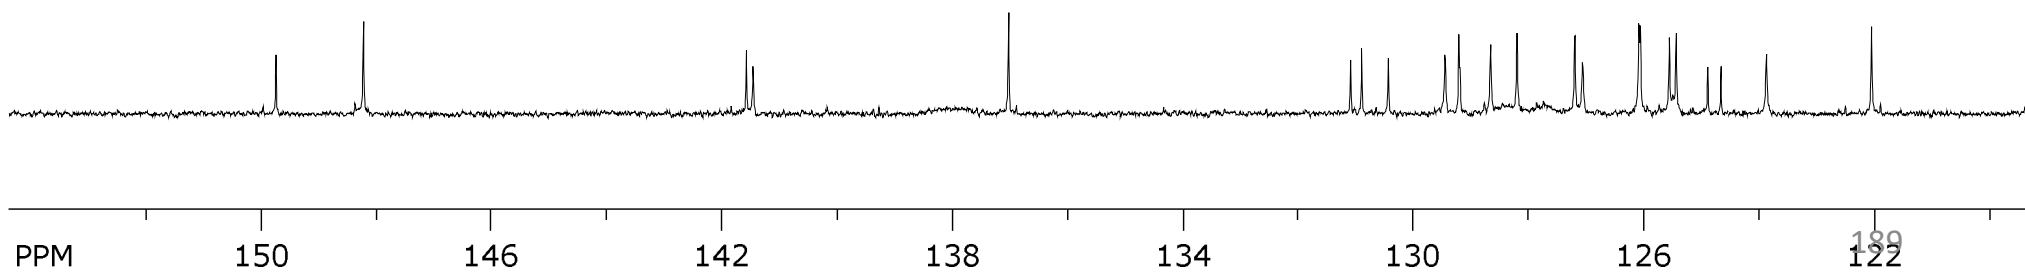

SpinWorks 4: SUB-51 RE  
PROTON CDCl3 /opt/topspin3.5pl2/nmrdata nmrsu 33

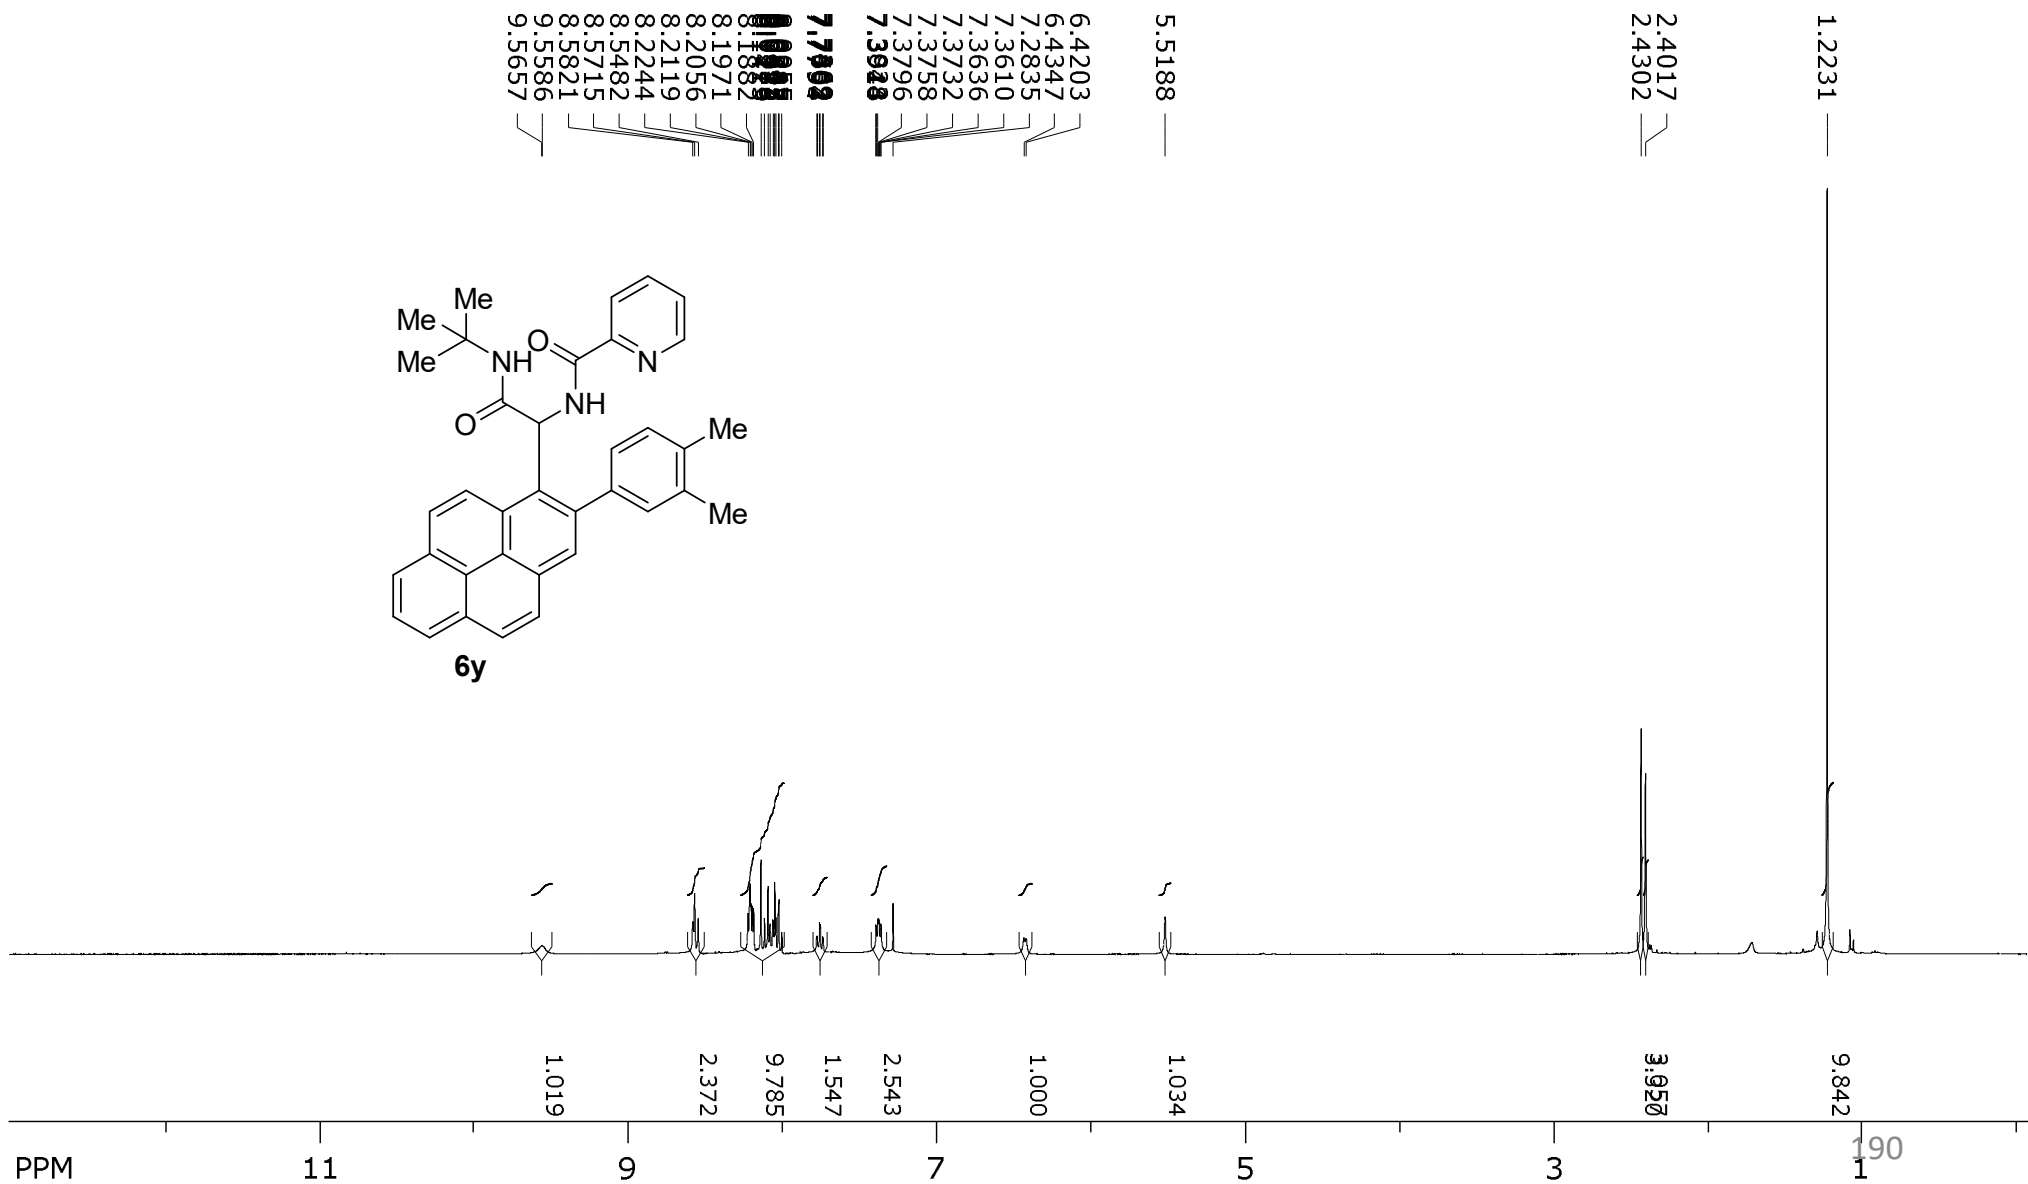

SpinWorks 4: SUB-51 RE  
PROTON CDCl3 /opt/topspin3.5pl2/nmrdata nmrsu 33

8.5482  
8.5715  
8.5821

8.0055  
8.0247  
8.0287  
8.0437  
8.0513  
8.0625  
8.0822  
8.0953  
8.1176  
8.1413  
8.1882  
8.1971  
8.2056  
8.2119  
8.2244

7.7369  
7.7409  
7.7562  
7.7602  
7.7753  
7.7794

7.3610  
7.3636  
7.3732  
7.3758  
7.3796  
7.3823  
7.3918  
7.3944

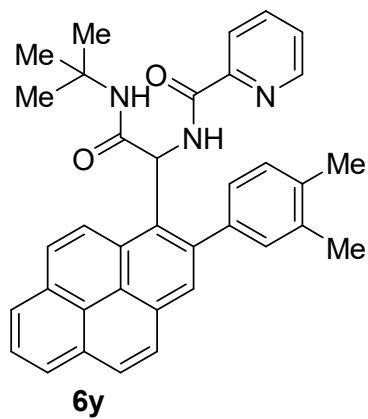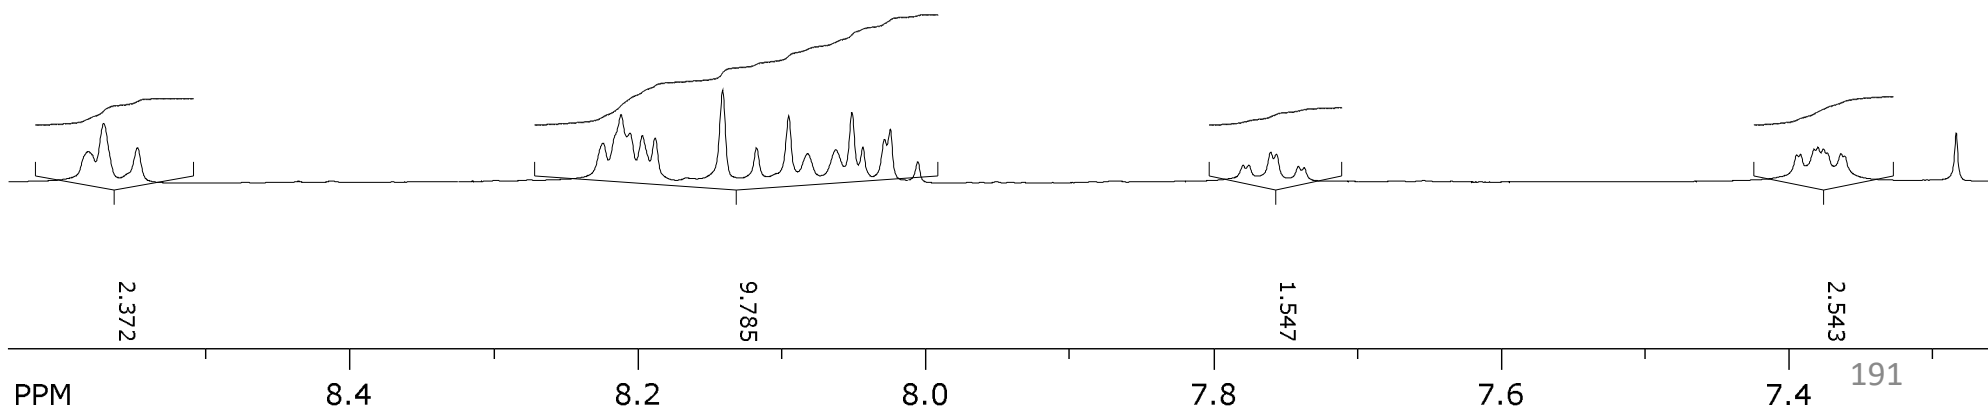

SpinWorks 4: SUB-51 RE  
PROTON CDCl3 /opt/topspin3.5pl2/nmrdata nmrsu 33

2.4017  
2.4302

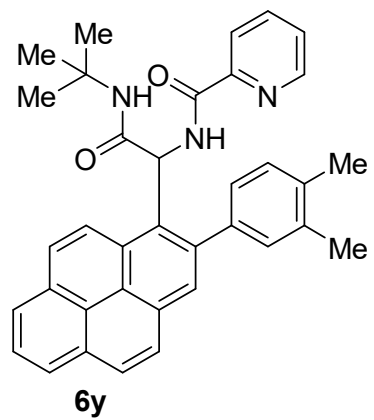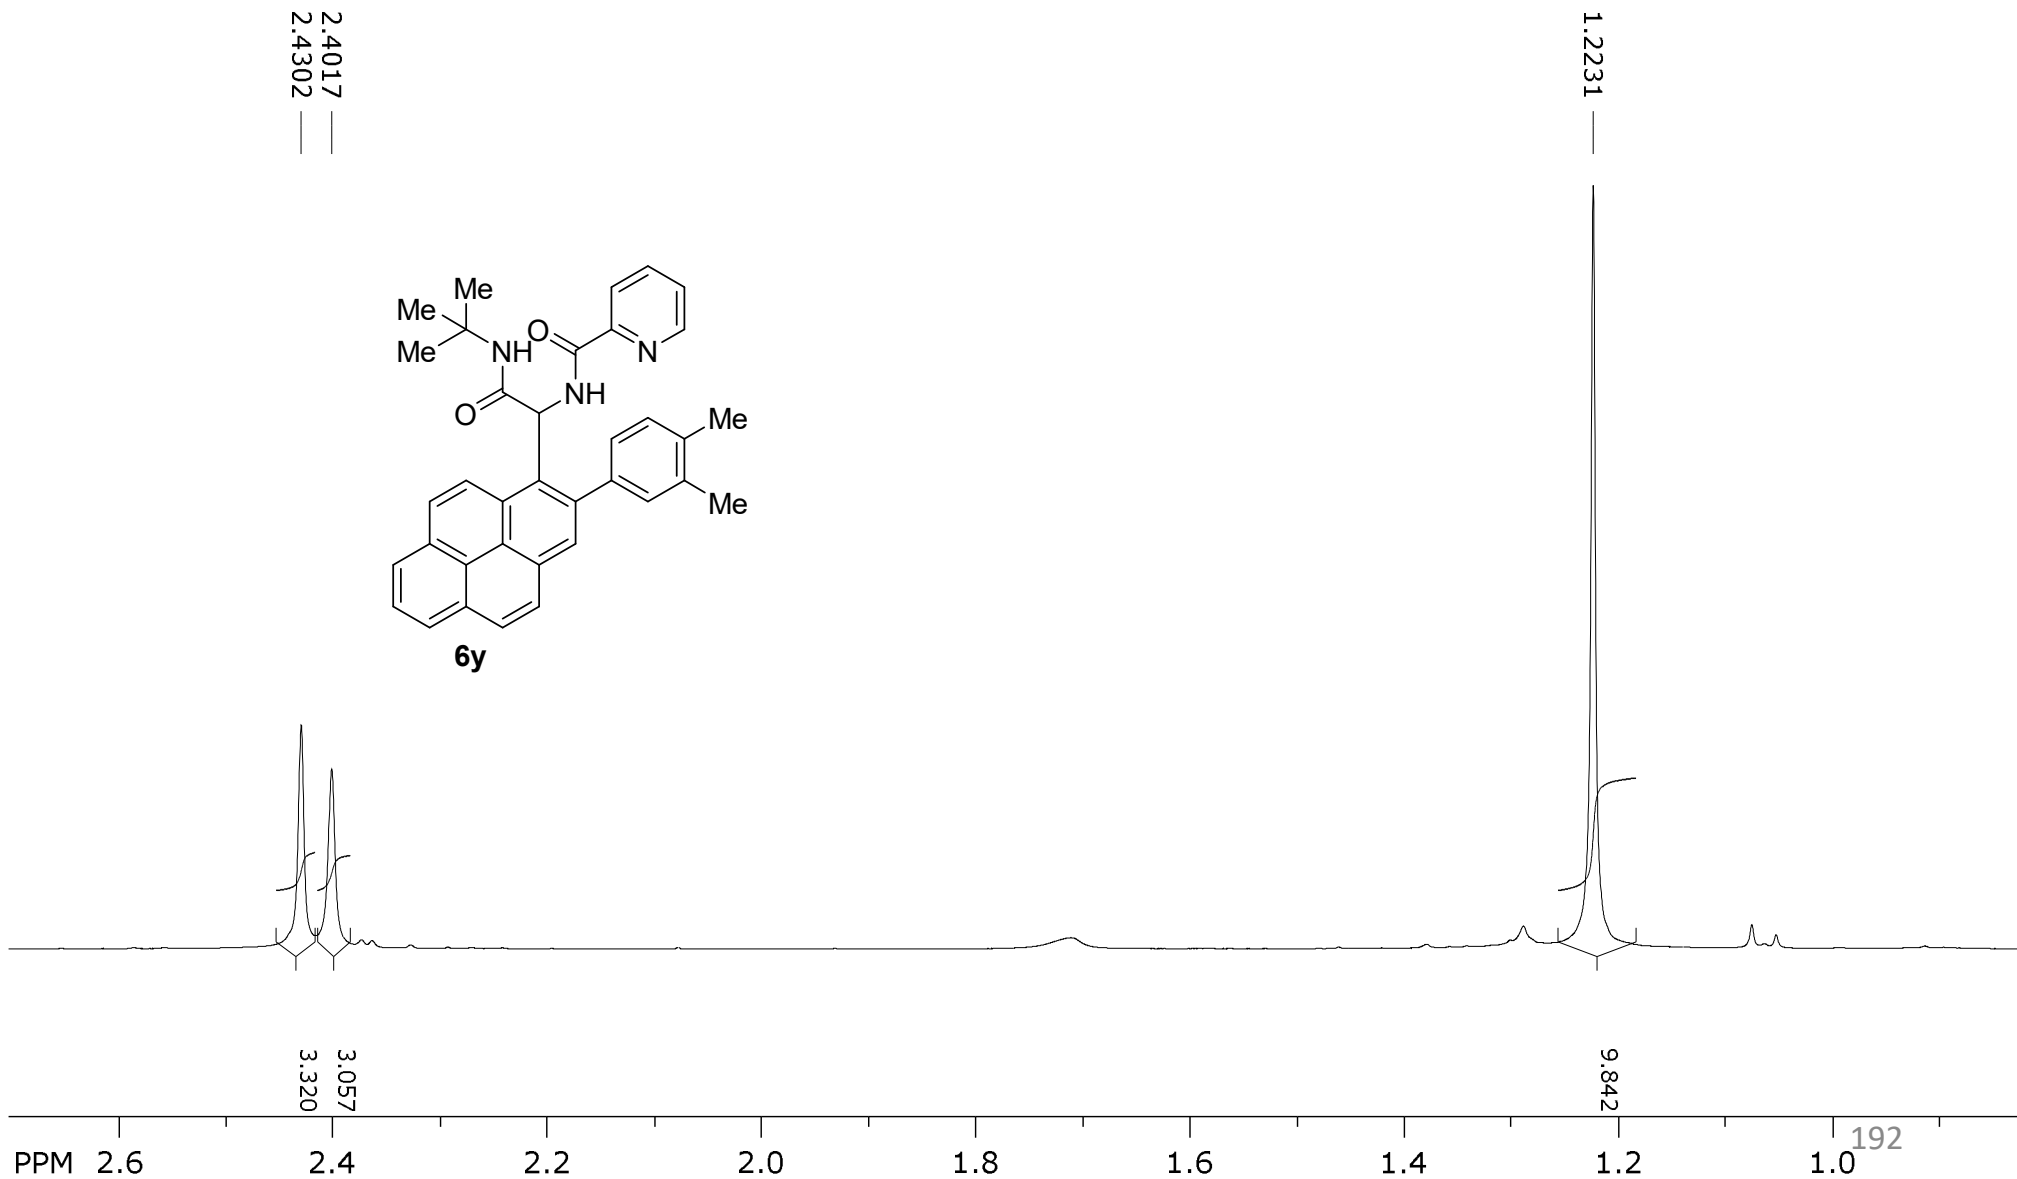



SpinWorks 4: SUB-51 RE  
C13CPD256 CDCl3 /opt/topspin3.5pl2/nmrdata nmrsu 33

122.071  
123.919  
124.704  
124.953  
125.480  
125.577  
129.091  
129.199  
129.333  
129.333  
130.470  
130.961  
131.128  
136.198  
137.050  
139.248  
141.411  
148.278  
149.764  
163.648  
169.541

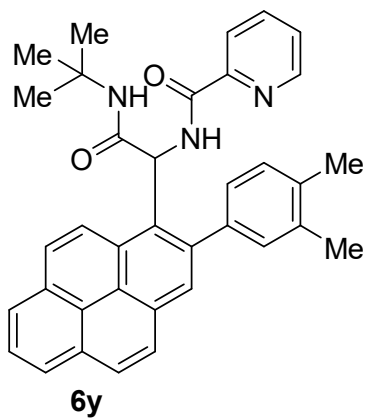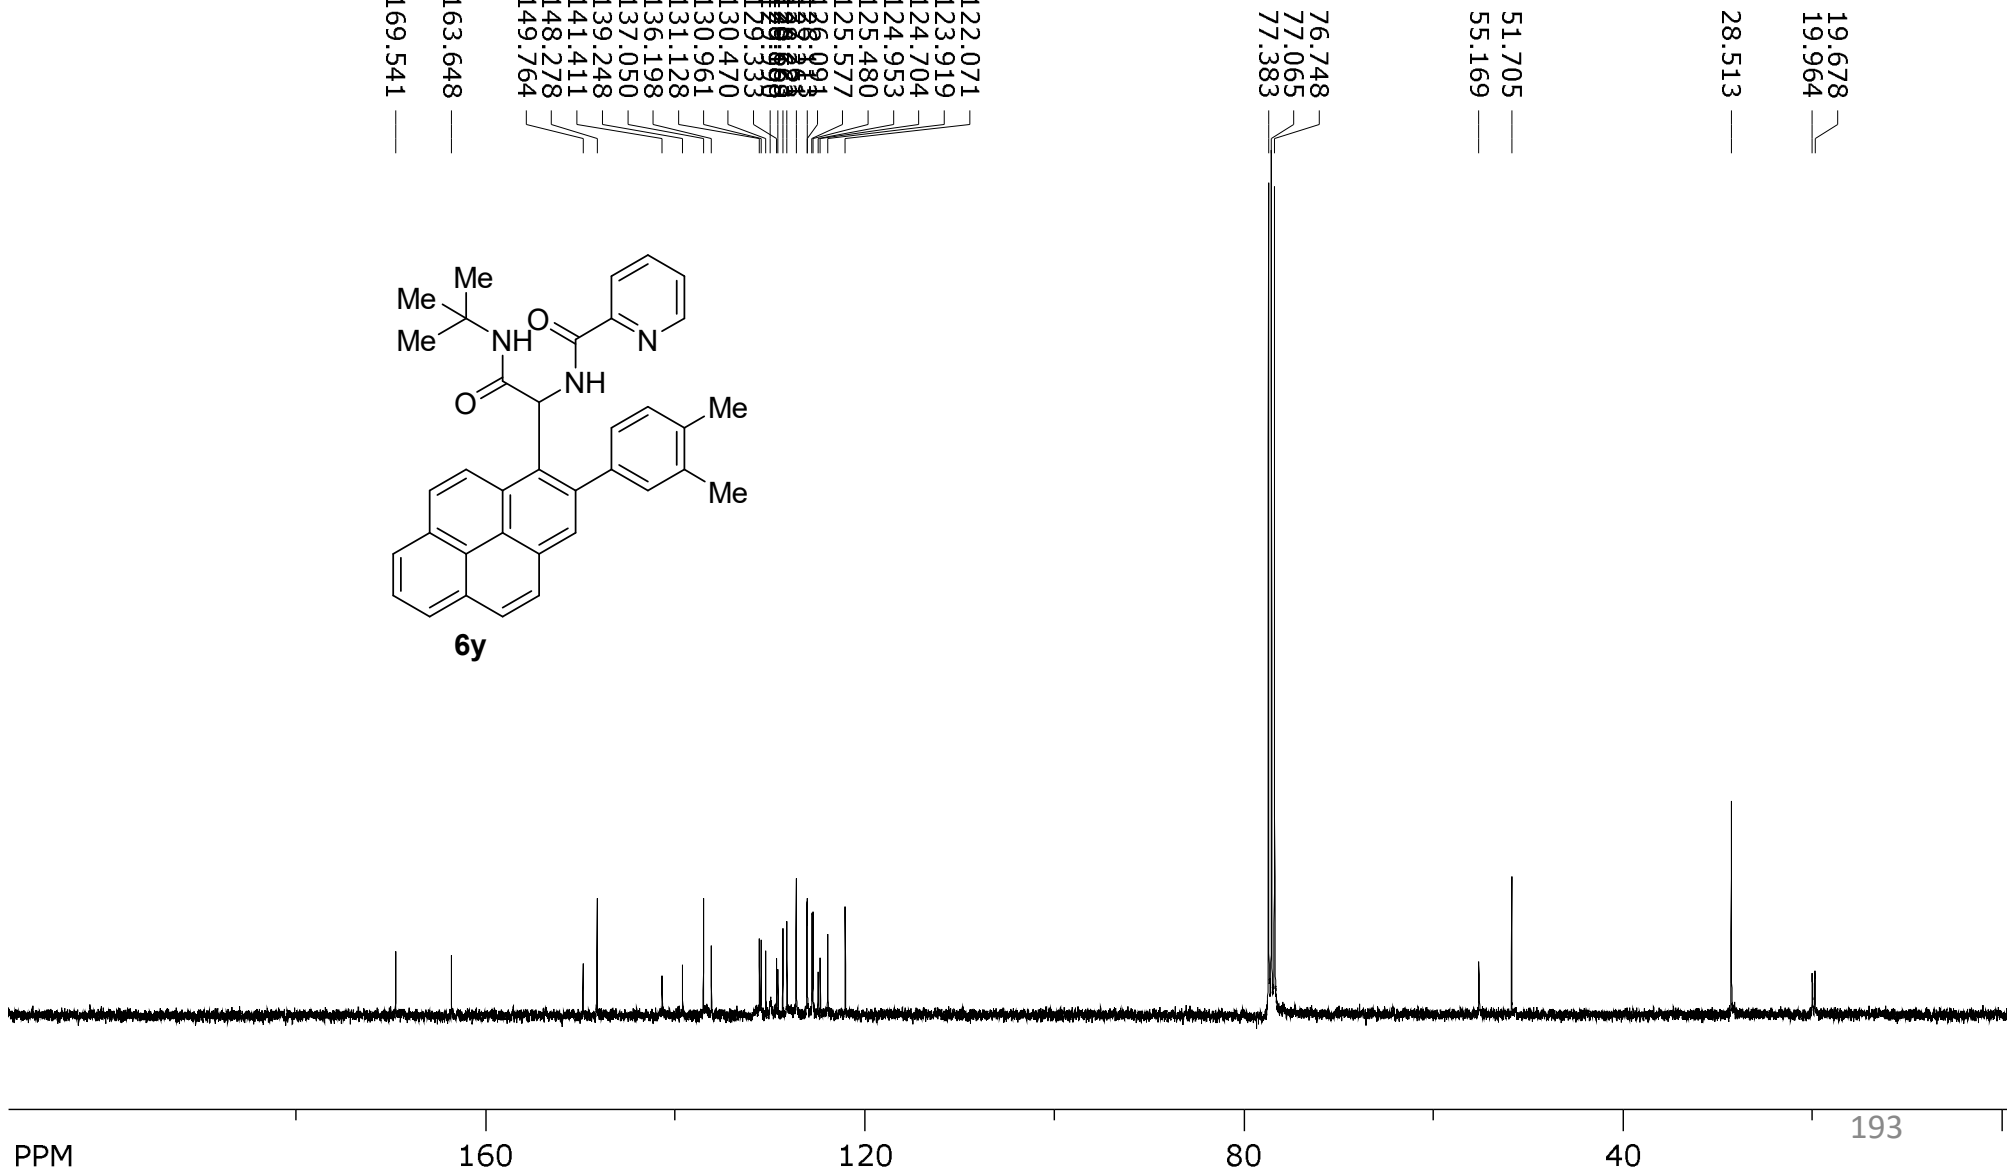

SpinWorks 4: SUB-51 RE  
C13CPD256 CDCl3 /opt/topspin3.5pl2/nmrdata nmrsu 33

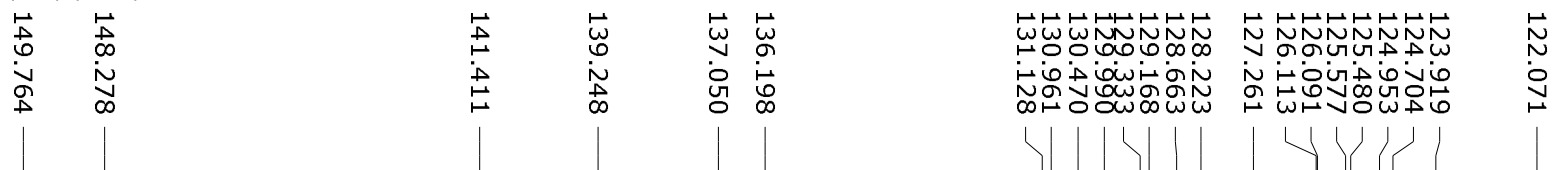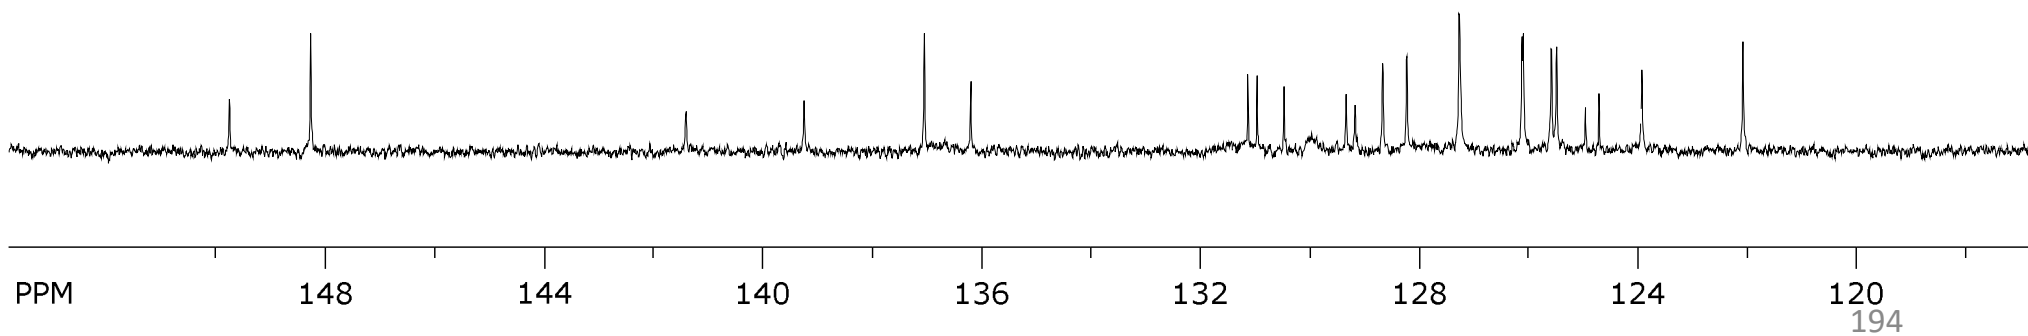



SpinWorks 4: AD 2081  
PROTON CDCl3 /opt/topspin3.5pl2/nmrdata nmrsu 10

8.5452  
8.5688  
8.5744  
8.5766  
8.5781  
8.5867  
8.5886  
8.5899

8.1674  
8.1773  
8.1895  
8.2002  
8.2084  
8.1386  
8.1106  
8.1037  
8.0939  
8.0812  
8.0766  
8.0568  
8.0402  
8.0285  
8.0179  
8.0095  
7.9904

7.7214  
7.7255  
7.7408  
7.7448  
7.7600  
7.7640

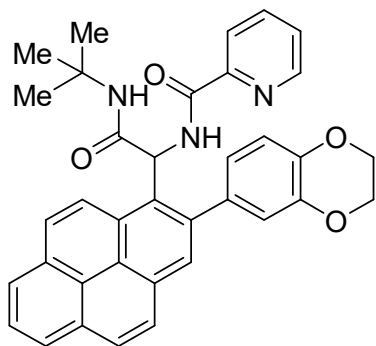

6z

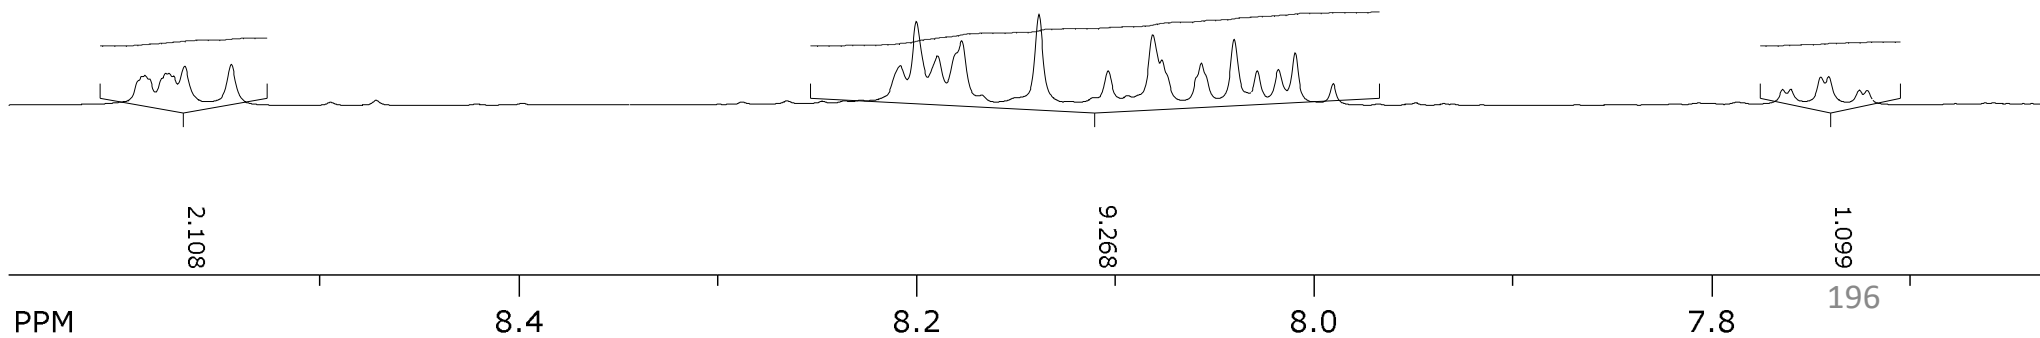

SpinWorks 4: AD 2081  
PROTON CDCl3 /opt/topspin3.5pl2/nmrdata nmrsu 10

7.7214  
7.7255  
7.7408  
7.7448  
7.7600  
7.7640

7.3497  
7.3522  
7.3618  
7.3644  
7.3685  
7.3710  
7.3806  
7.3831

7.2834

7.0857  
7.0967  
7.1025  
7.1051  
7.1261

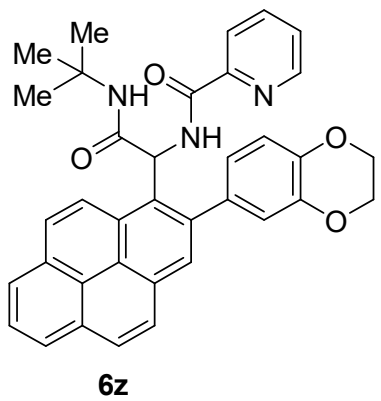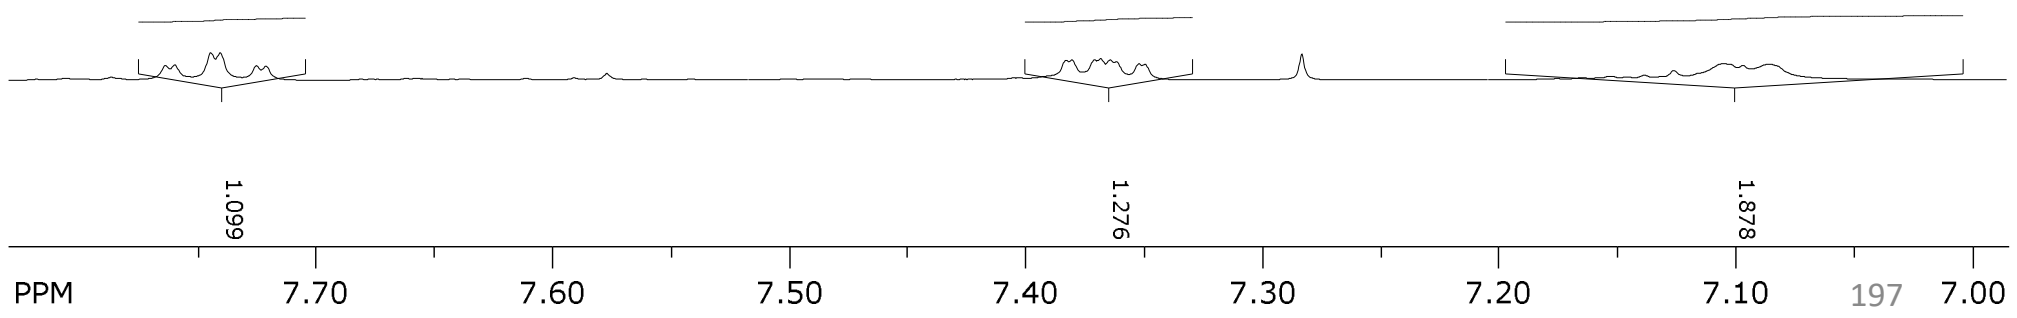

SpinWorks 4: AD 2081  
PROTON CDCl3 /opt/topspin3.5pl2/nmrdata nmrsu 10

6.4610  
6.4755

5.5216

4.3860

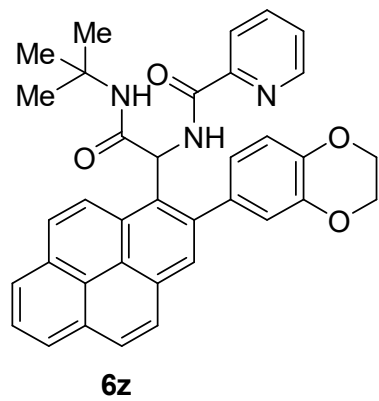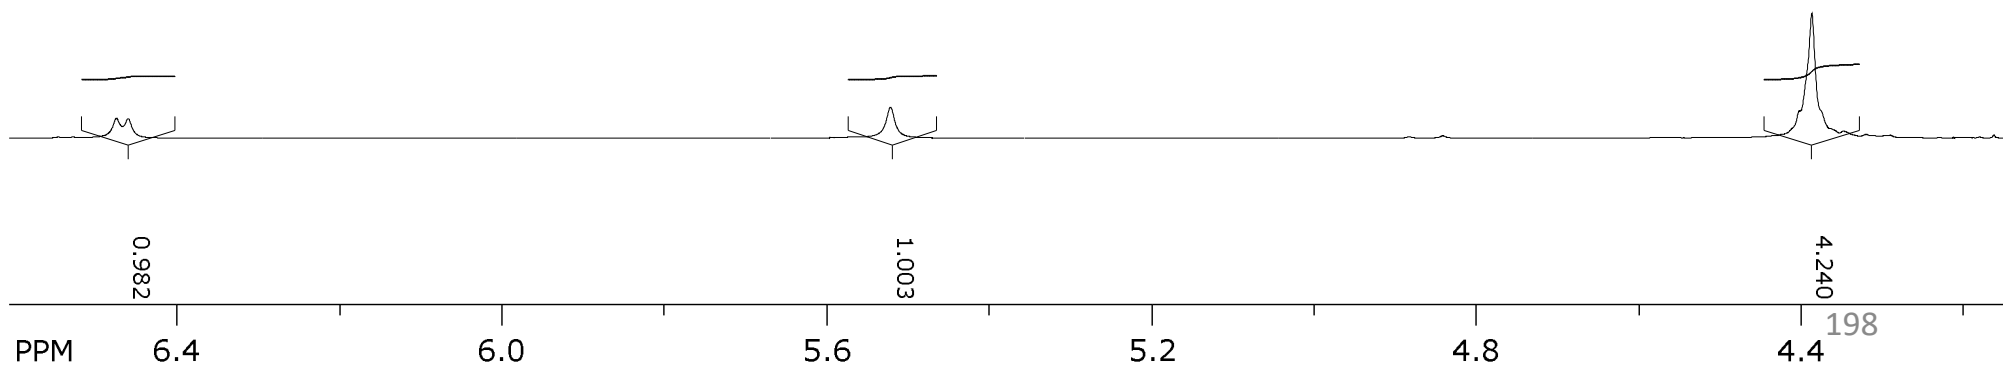

SpinWorks 4: AD 2081  
C13CPD256 CDCl3 /opt/topspin3.5pl2/nmrdata nmrsu 10

122.096  
123.932  
124.664  
124.997  
125.493  
125.597  
125.652  
125.717  
125.782  
129.408  
129.408  
129.408  
130.461  
130.977  
131.122  
134.972  
137.043  
140.709  
143.419  
143.507  
148.281  
149.734  
163.714  
169.510

76.773  
77.091  
77.409

64.491

51.750  
55.192

28.519

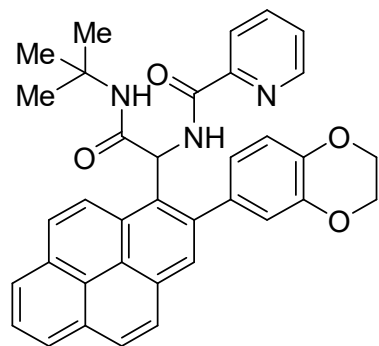

6z

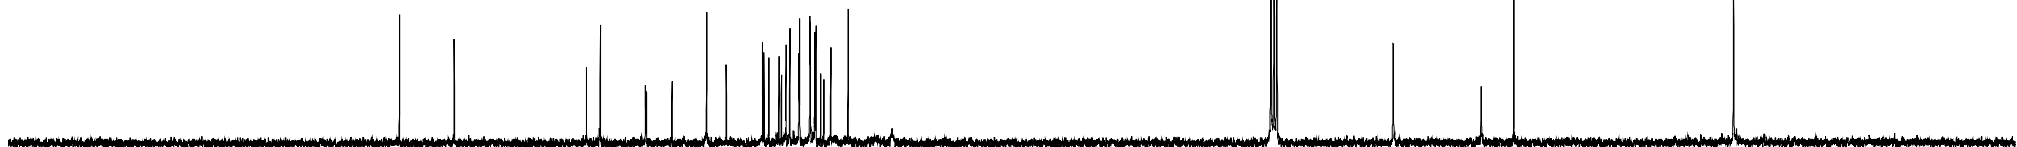

PPM

160

120

80

40

199

SpinWorks 4: AD 2081  
C13CPD256 CDCl3 /opt/topspin3.5pl2/nmrdata nmrsu 10

149.734 —  
148.281 —  
143.419 —  
143.507 —  
140.709 —  
137.043 —  
134.972 —  
130.461 —  
130.977 —  
131.122 —  
129.408 —  
128.256 —  
128.665 —  
129.146 —  
127.220 —  
127.278 —  
126.141 —  
125.652 —  
125.597 —  
125.493 —  
124.997 —  
124.664 —  
123.932 —  
122.096 —

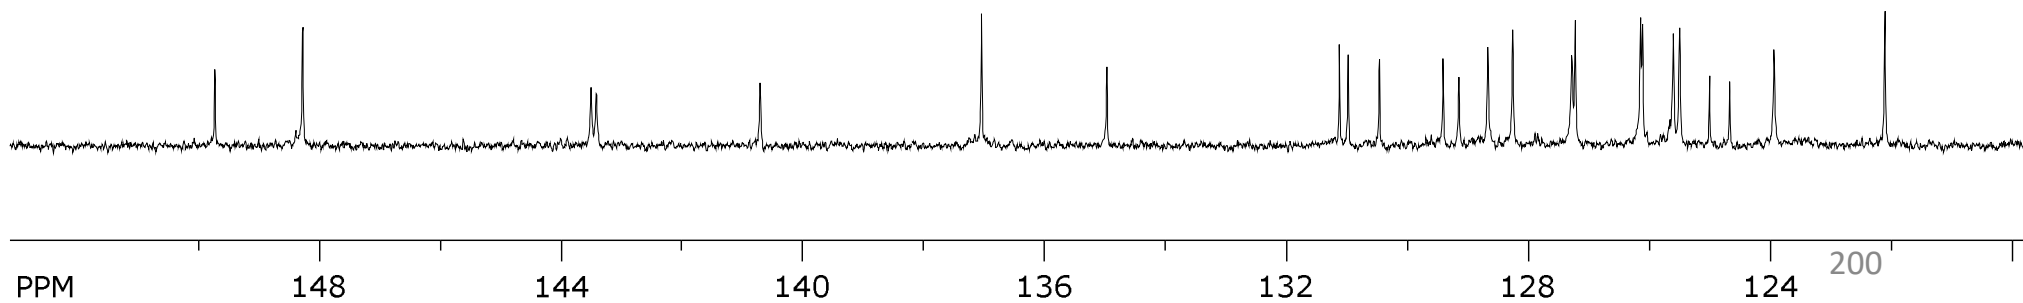



SpinWorks 4: AD-1991  
PROTON CDCl3 /opt/topspin3.5pl2/nmrdata nmrsu 28

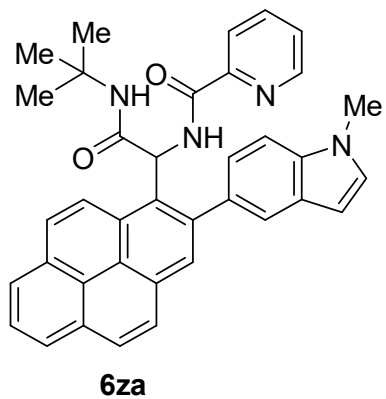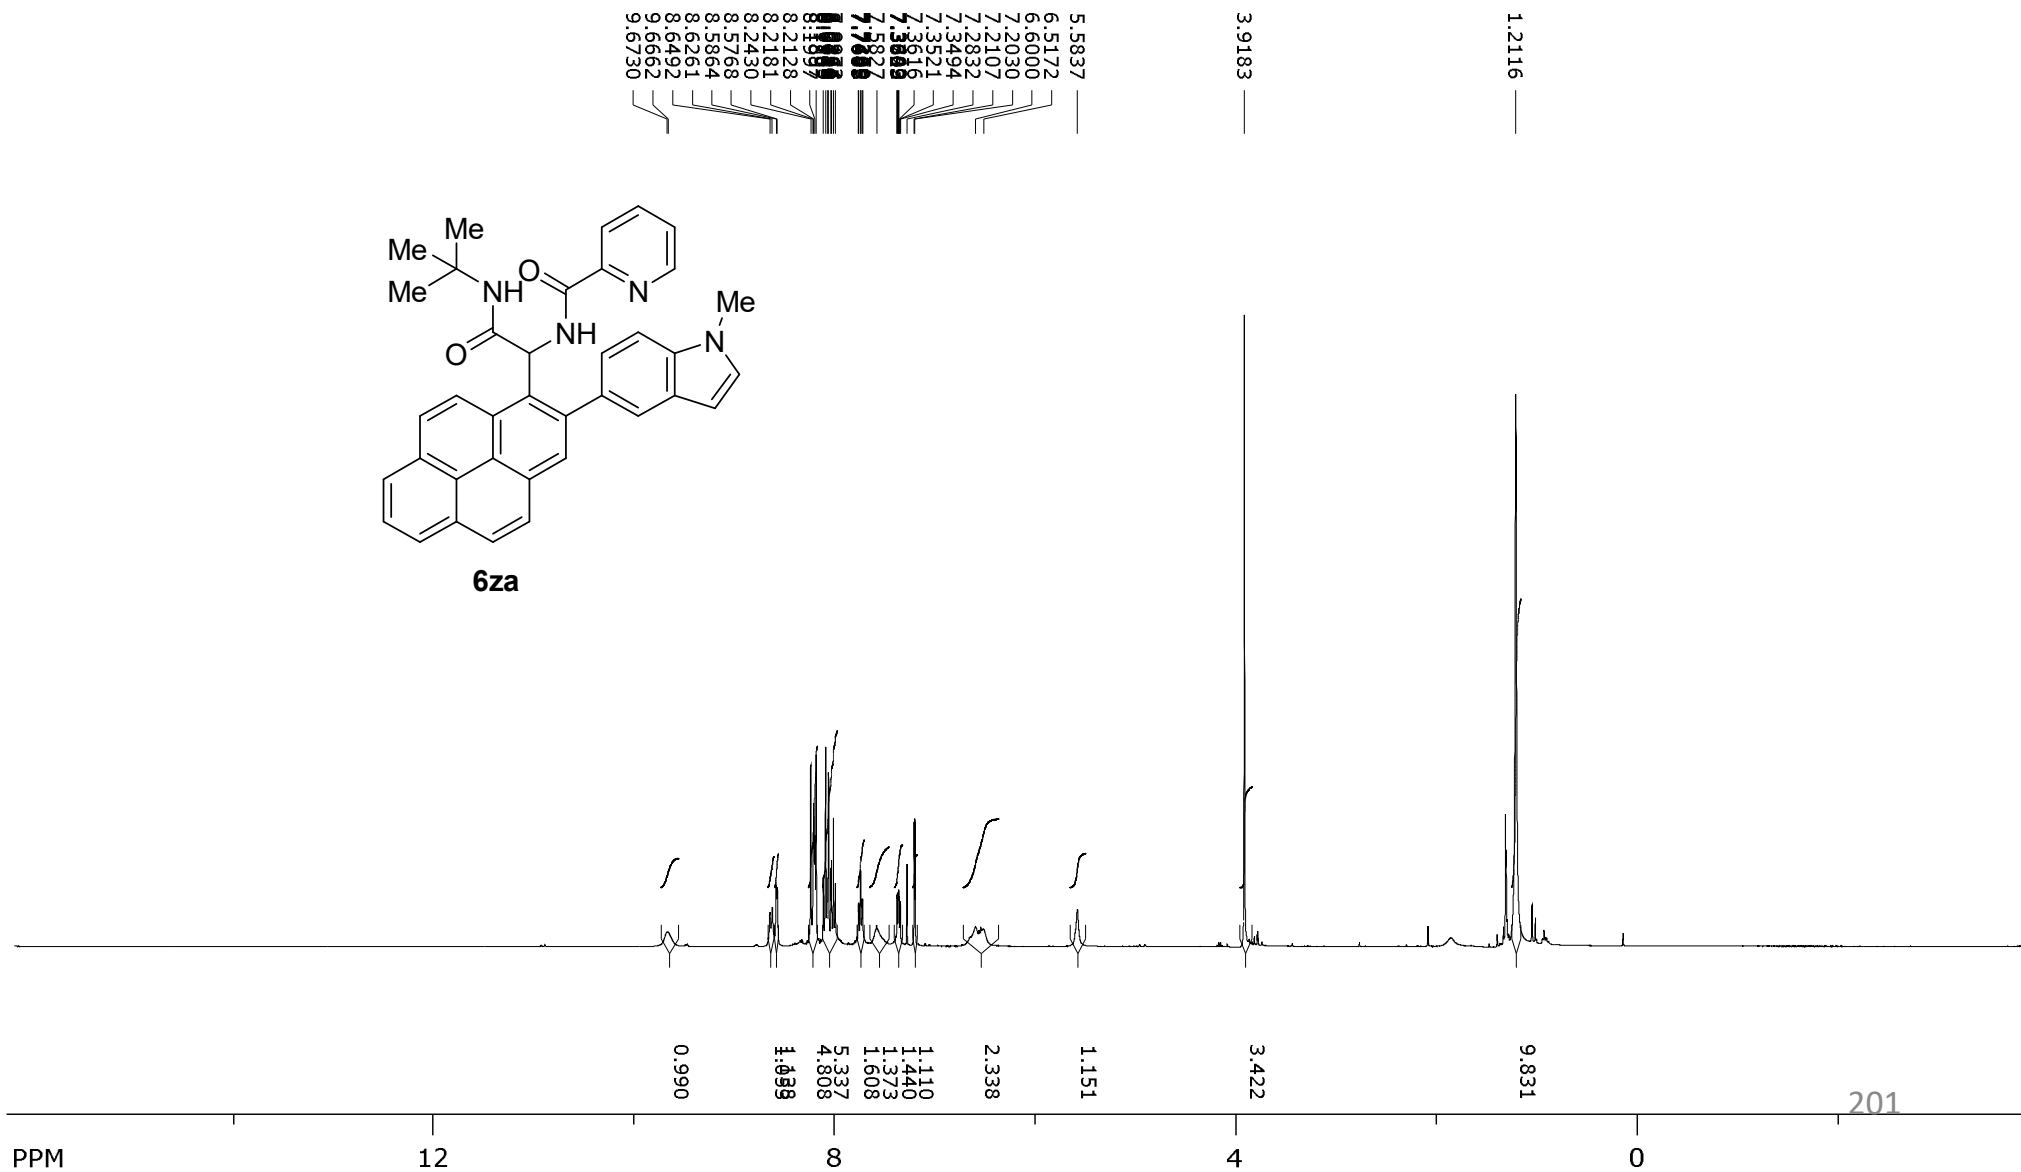

SpinWorks 4: AD-1991  
PROTON CDCI3 /opt/topspin3.5pl2/nmrdata nmrsu 28

9.6662  
9.6750

8.5768  
8.5864  
8.6261  
8.6492

7.9973  
8.0164  
8.0355  
8.0424  
8.0649  
8.0718  
8.0945  
8.1169  
8.1897  
8.1997  
8.2128  
8.2181  
8.2430

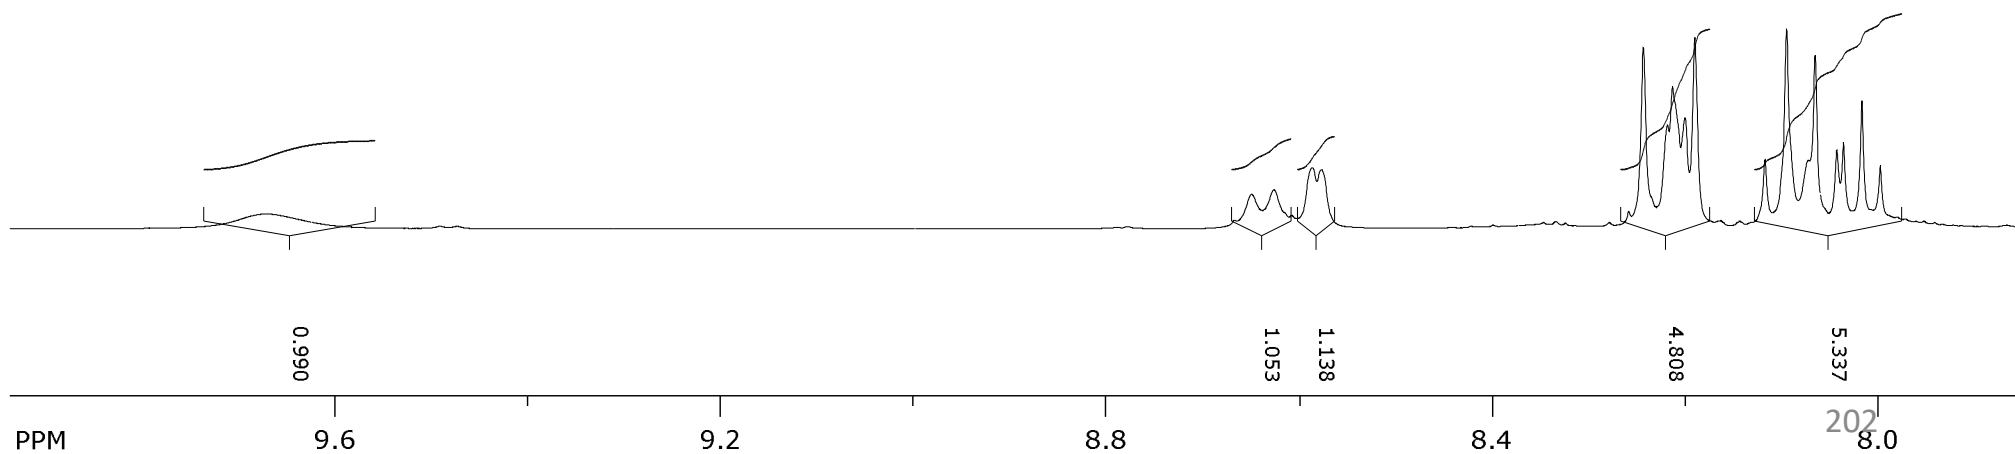

SpinWorks 4: AD-1991  
PROTON CDCl3 /opt/topspin3.5pl2/nmrdata nmrsu 28

7.7259  
7.7300  
7.7452  
7.7492  
7.7645  
7.7685

7.5827

7.3494  
7.3521  
7.3616  
7.3643  
7.3682  
7.3709  
7.3803  
7.3829

7.2832

7.2030  
7.2107

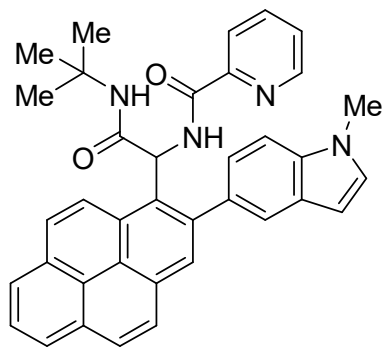

6za

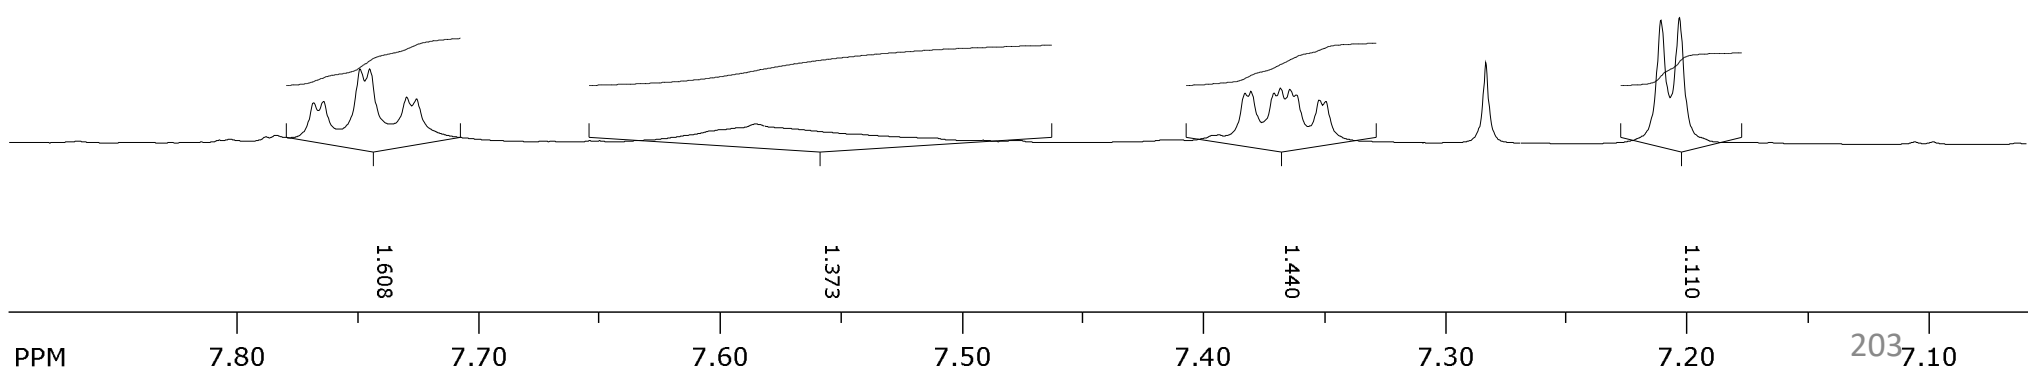

SpinWorks 4: AD-1991  
PROTON CDCl3 /opt/topspin3.5pl2/nmrdata nmrsu 28

6.6000  
6.5172  
5.5837

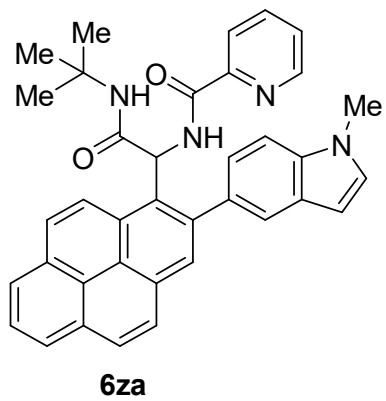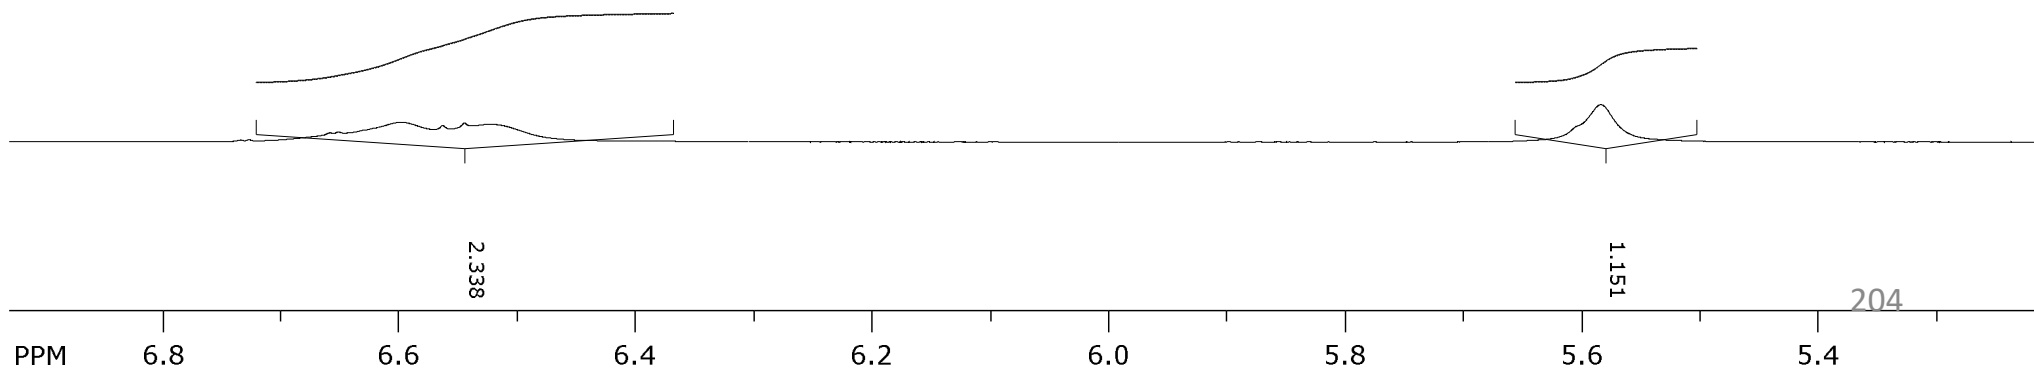

SpinWorks 4: AD-1991  
C13CPD256 CDCl3 /opt/topspin3.5pl2/nmrdata nmrsu 28

121.997  
124.120  
124.744  
124.885  
125.342  
125.423  
125.996  
129.898  
129.900  
129.900  
130.456  
130.796  
131.111  
131.111  
136.249  
136.979  
142.353  
148.250  
149.829  
163.593  
169.485

76.742  
77.060  
77.378

51.611  
55.246

28.467  
33.038

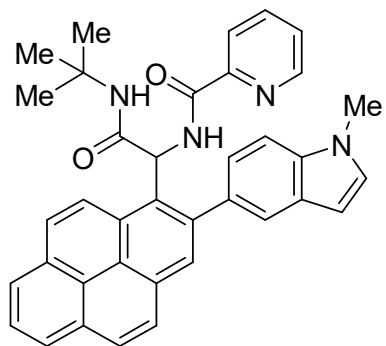

6za

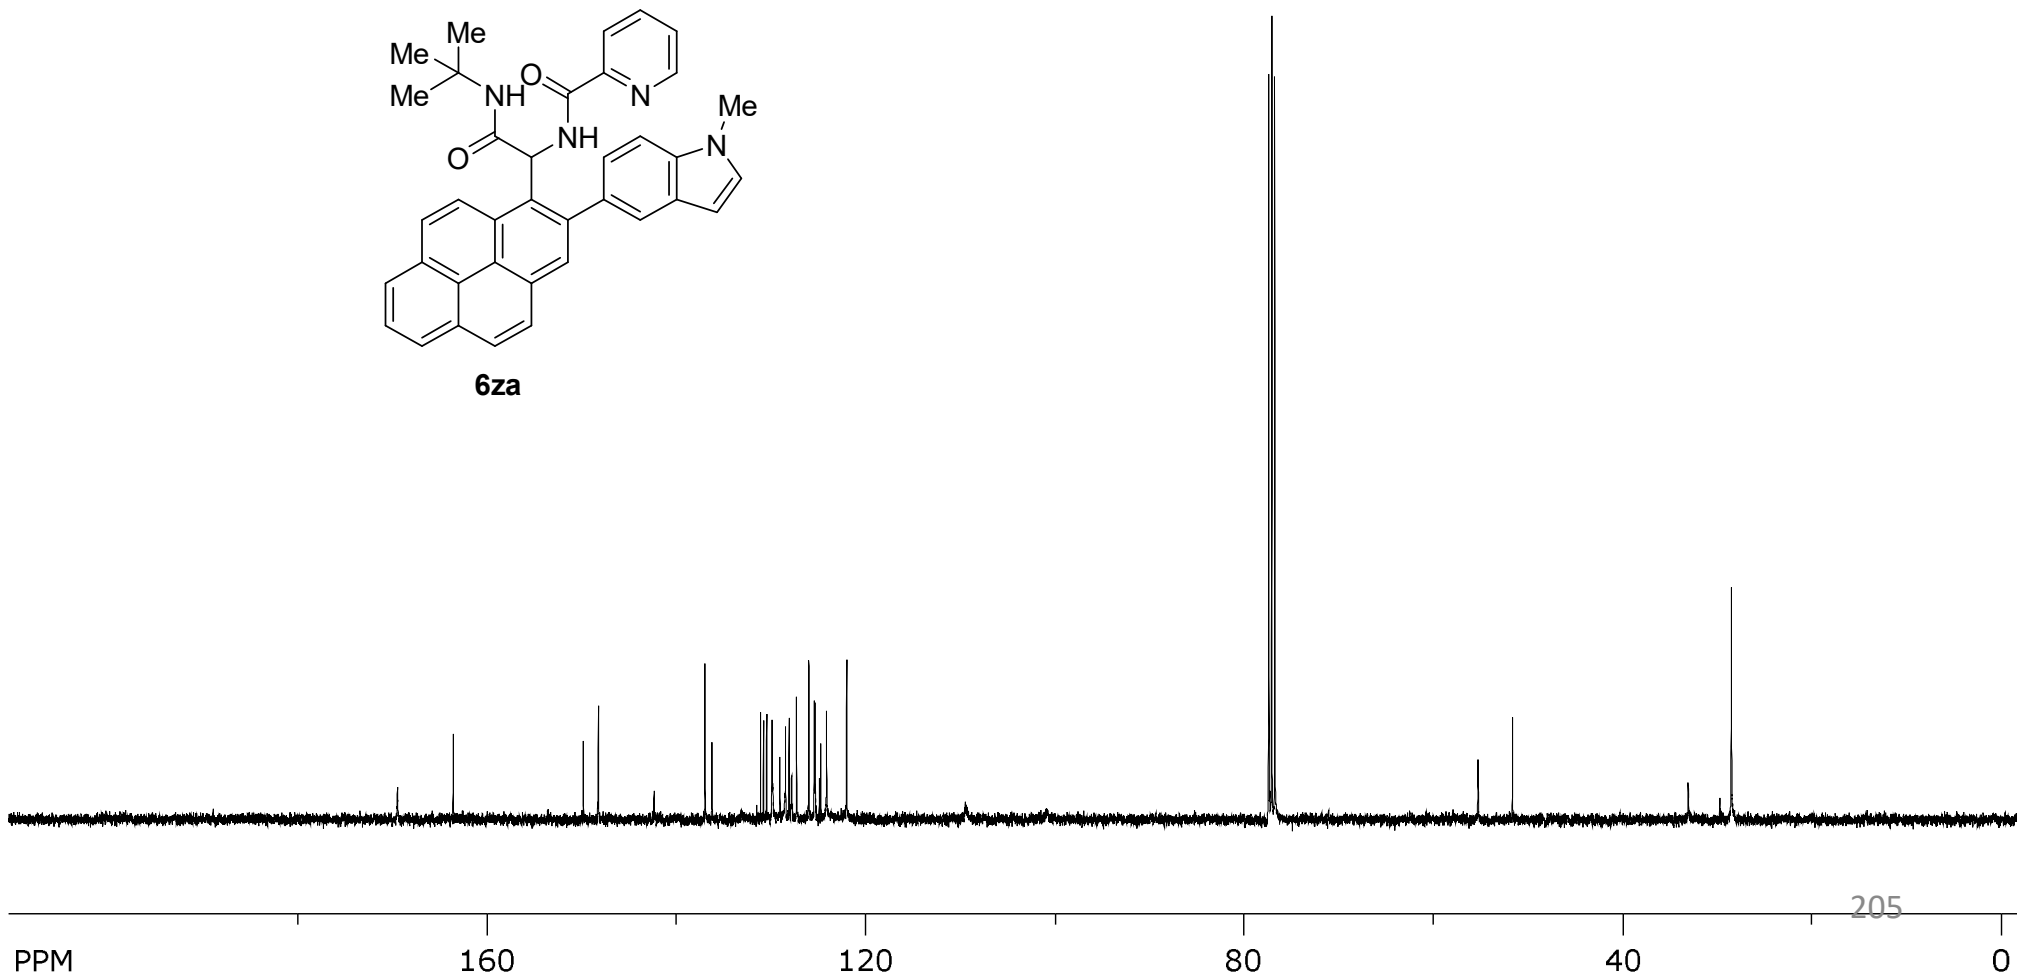

SpinWorks 4: AD-1991  
C13CPD256 CDCl3 /opt/topspin3.5pl2/nmrdata nmrsu 28

149,829

148,250

142,353

136,979

136,249

124,120  
124,744  
124,885  
125,342  
125,423  
125,996  
127,296  
127,814  
127,841  
127,917  
128,081  
128,462  
128,527  
128,557  
129,054  
129,747  
129,798  
129,821  
129,858  
129,900  
130,456  
130,796  
131,111

121,997

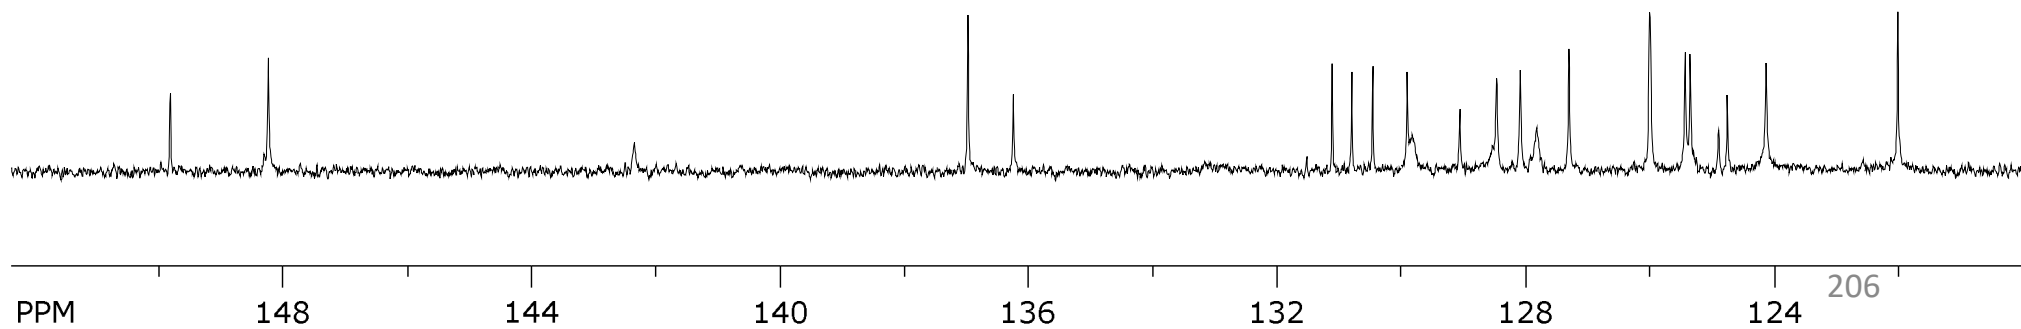

SpinWorks 4: AD-2175  
PROTON CDCl3 /opt/topspin3.5pl2/nmrdata nmrsu 39

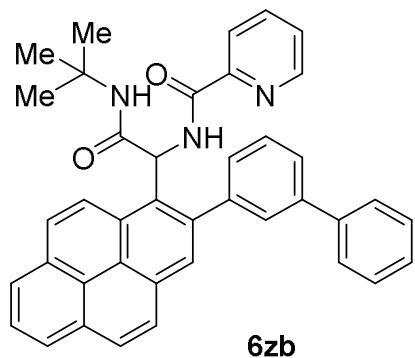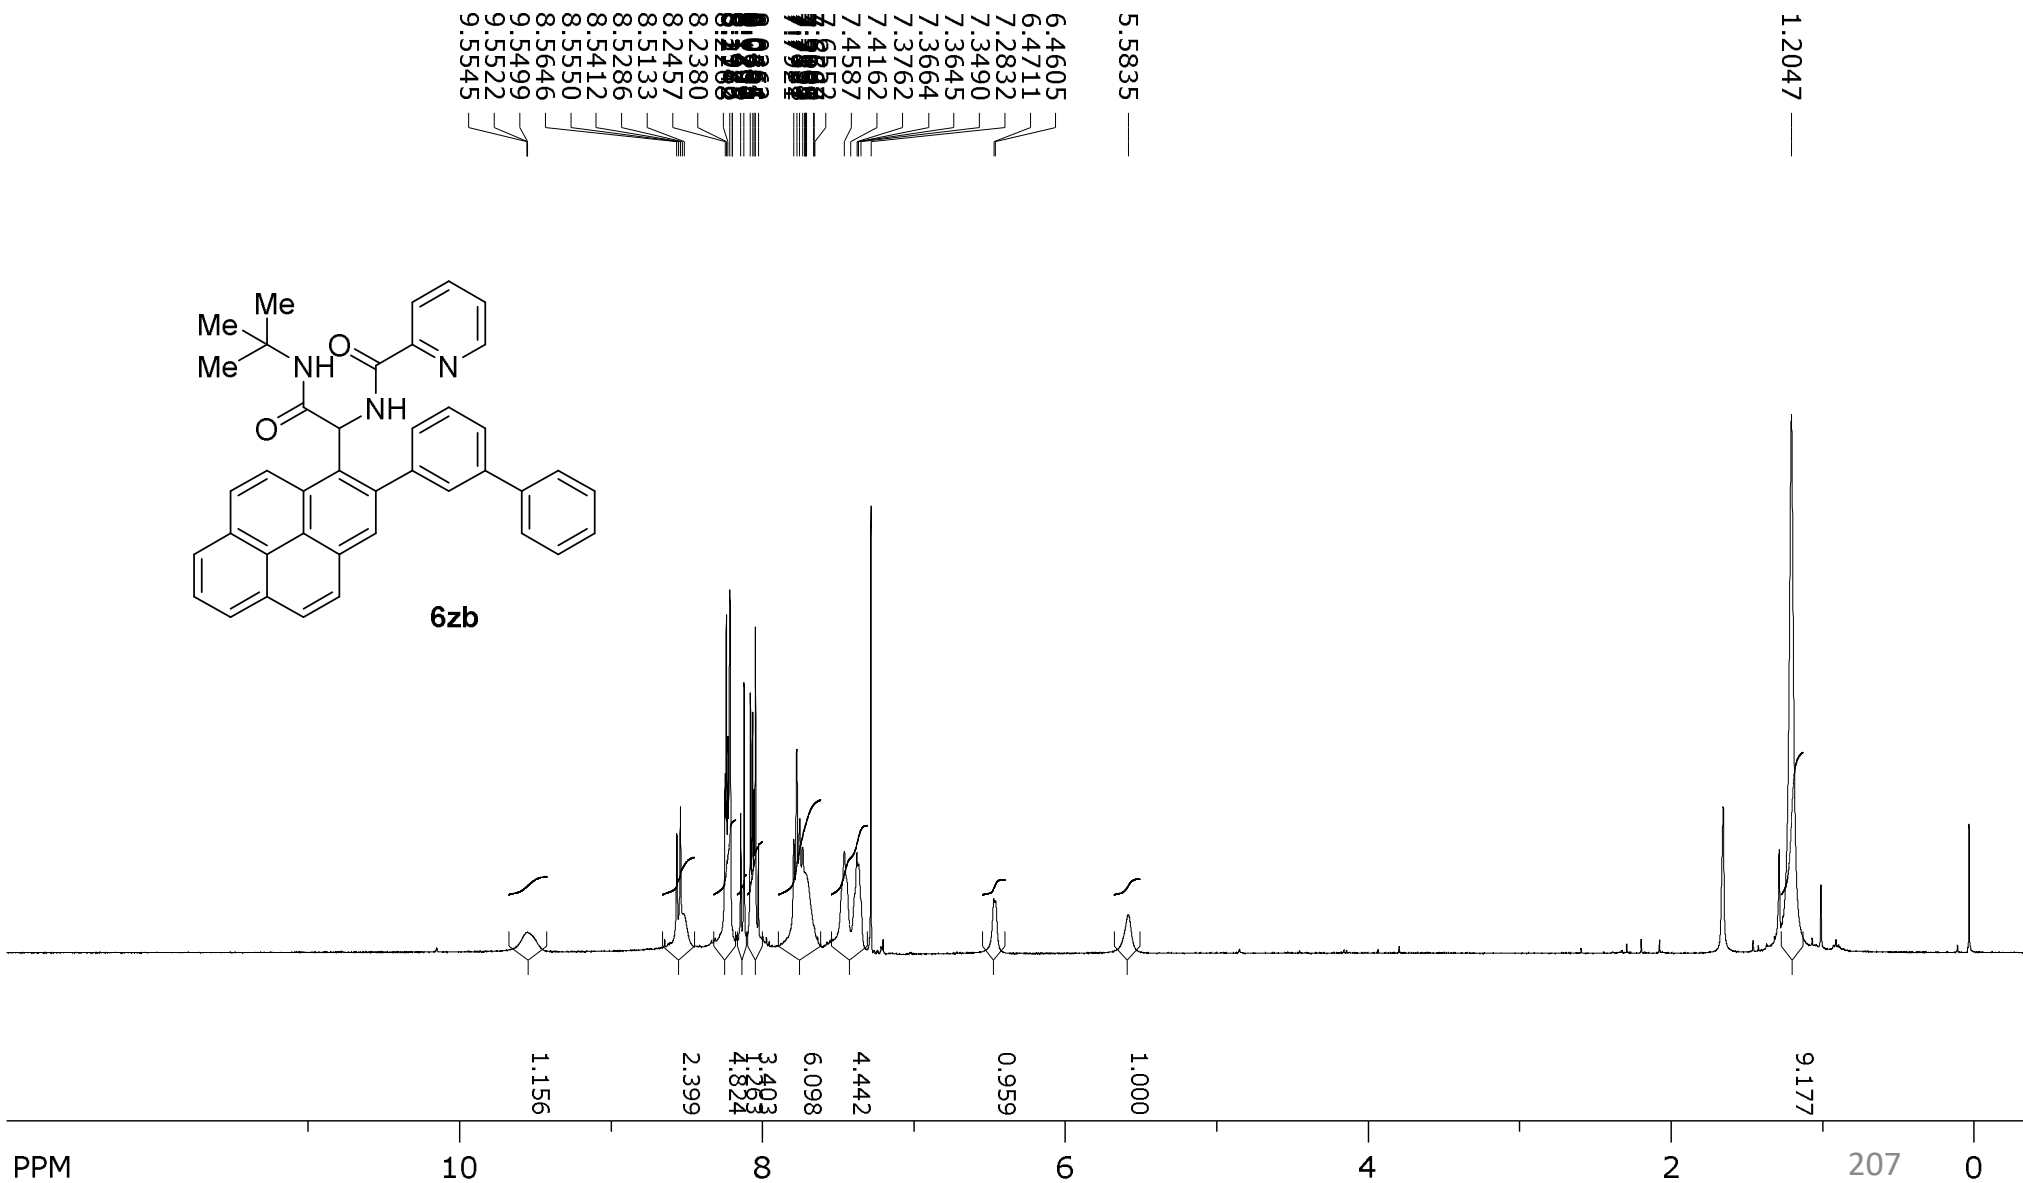

SpinWorks 4: AD-2175  
PROTON CDCl3 /opt/topspin3.5pl2/nmrdata nmrsu 39

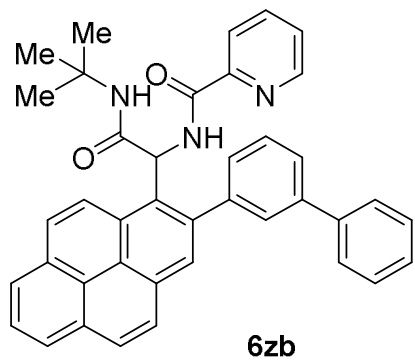

8.5133  
8.5286  
8.5412  
8.5550  
8.5646

8.0262  
8.0454  
8.0561  
8.0645  
8.0785  
8.1206  
8.1429  
8.1975  
8.1986  
8.2142  
8.2268  
8.2380  
8.2457

7.6552  
7.6567  
7.6603  
7.7069  
7.7137  
7.7155  
7.7175  
7.7195  
7.7234  
7.7288  
7.7732  
7.7921

7.2832  
7.3490  
7.3645  
7.3664  
7.3762  
7.4162  
7.4587

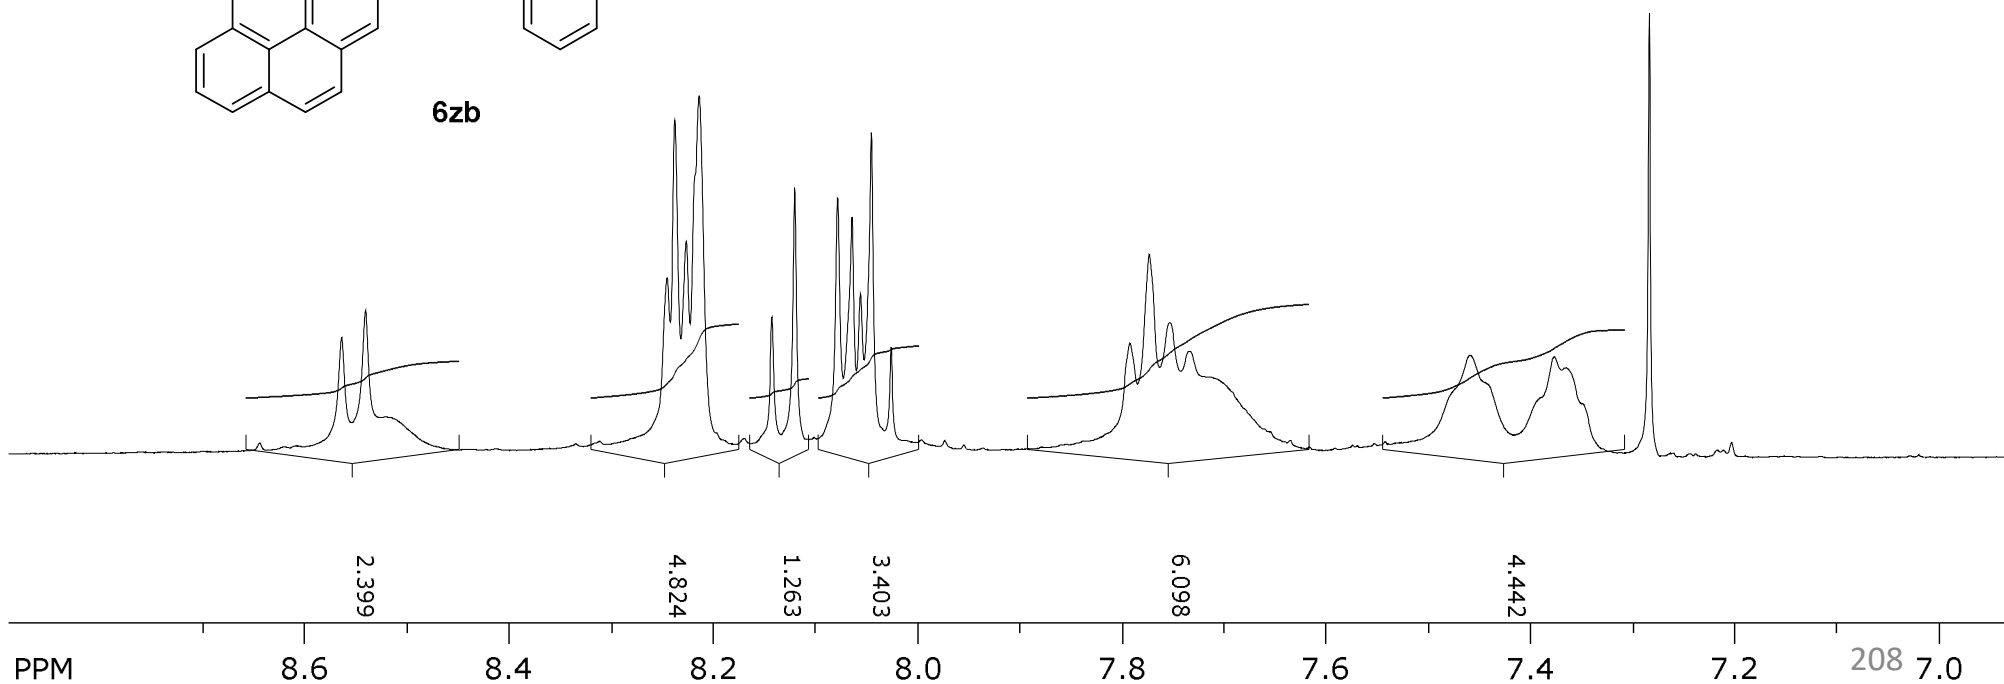



SpinWorks 4: AD-2175-RE  
C13CPD256 CDCl3 /opt/topspin3.5pl2/nmrdata nmrsu 47

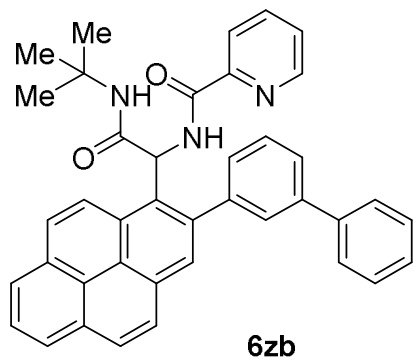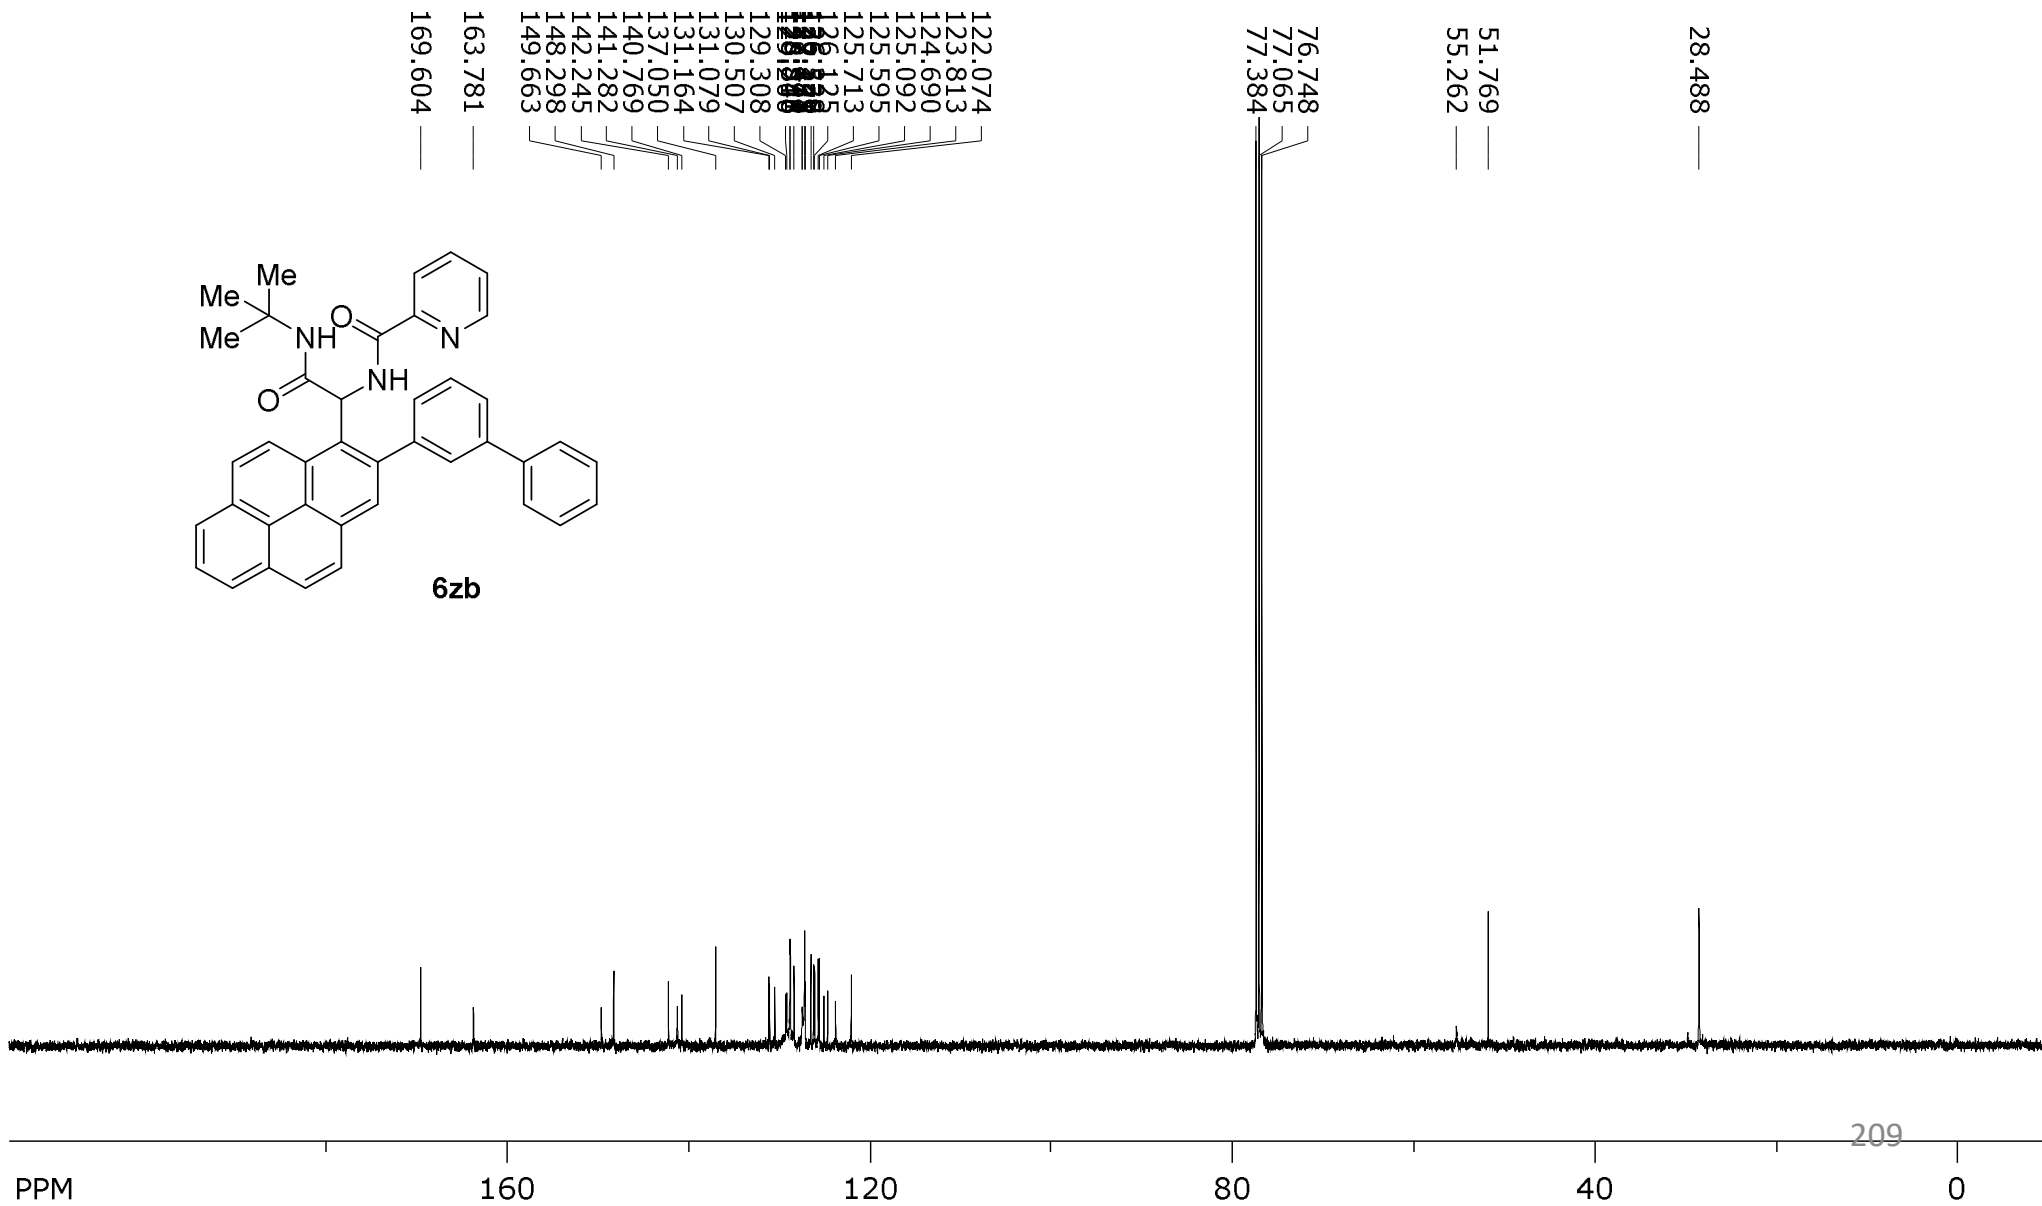

SpinWorks 4: AD-2175-RE  
C13CPD256 CDCl3 /opt/topspin3.5pl2/nmrdata nmrsu 47

149.663 —  
148.298 —

142.245 —  
140.769 —  
141.282 —

137.050 —

122.074 —  
123.813 —  
124.690 —  
125.092 —  
125.595 —  
125.713 —  
126.125 —  
126.228 —  
126.539 —  
127.171 —  
127.235 —  
127.477 —  
127.488 —  
128.391 —  
128.816 —  
128.848 —  
129.200 —  
129.308 —  
130.507 —  
131.079 —  
131.164 —

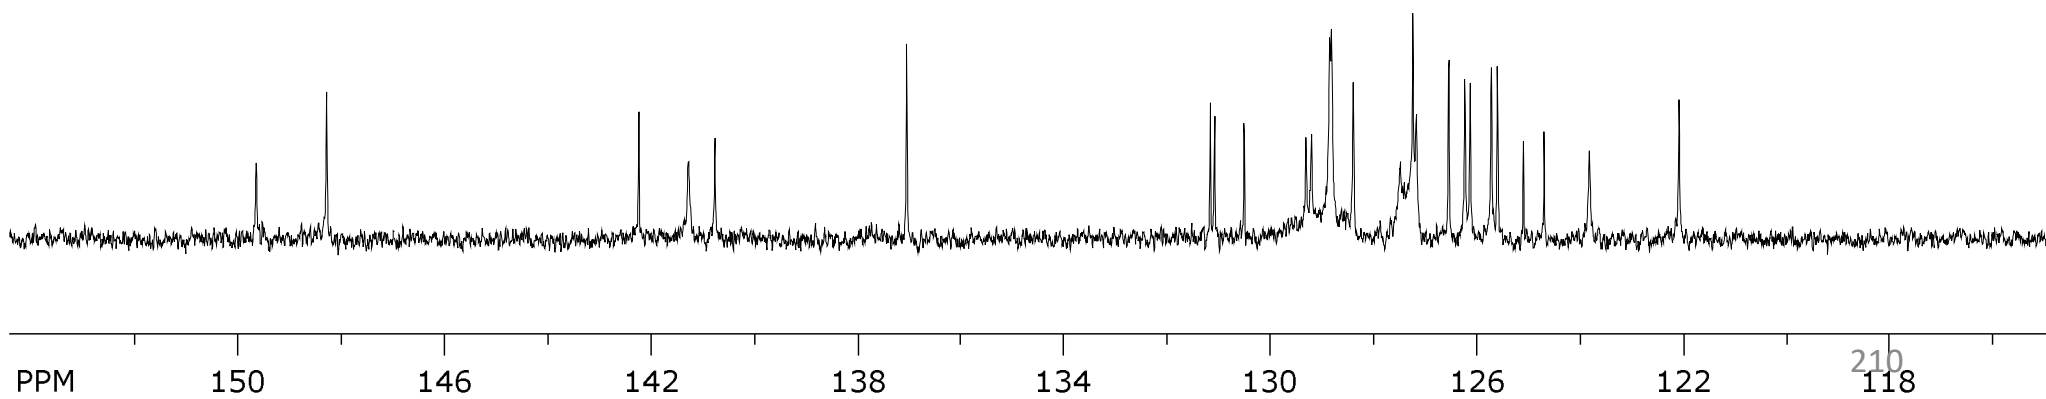

SpinWorks 4: AD-2178RE  
PROTON CDCl3 /opt/topspin3.5pl2/nmrdata nmrsu 53

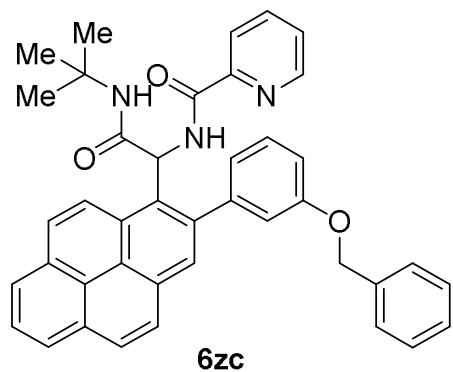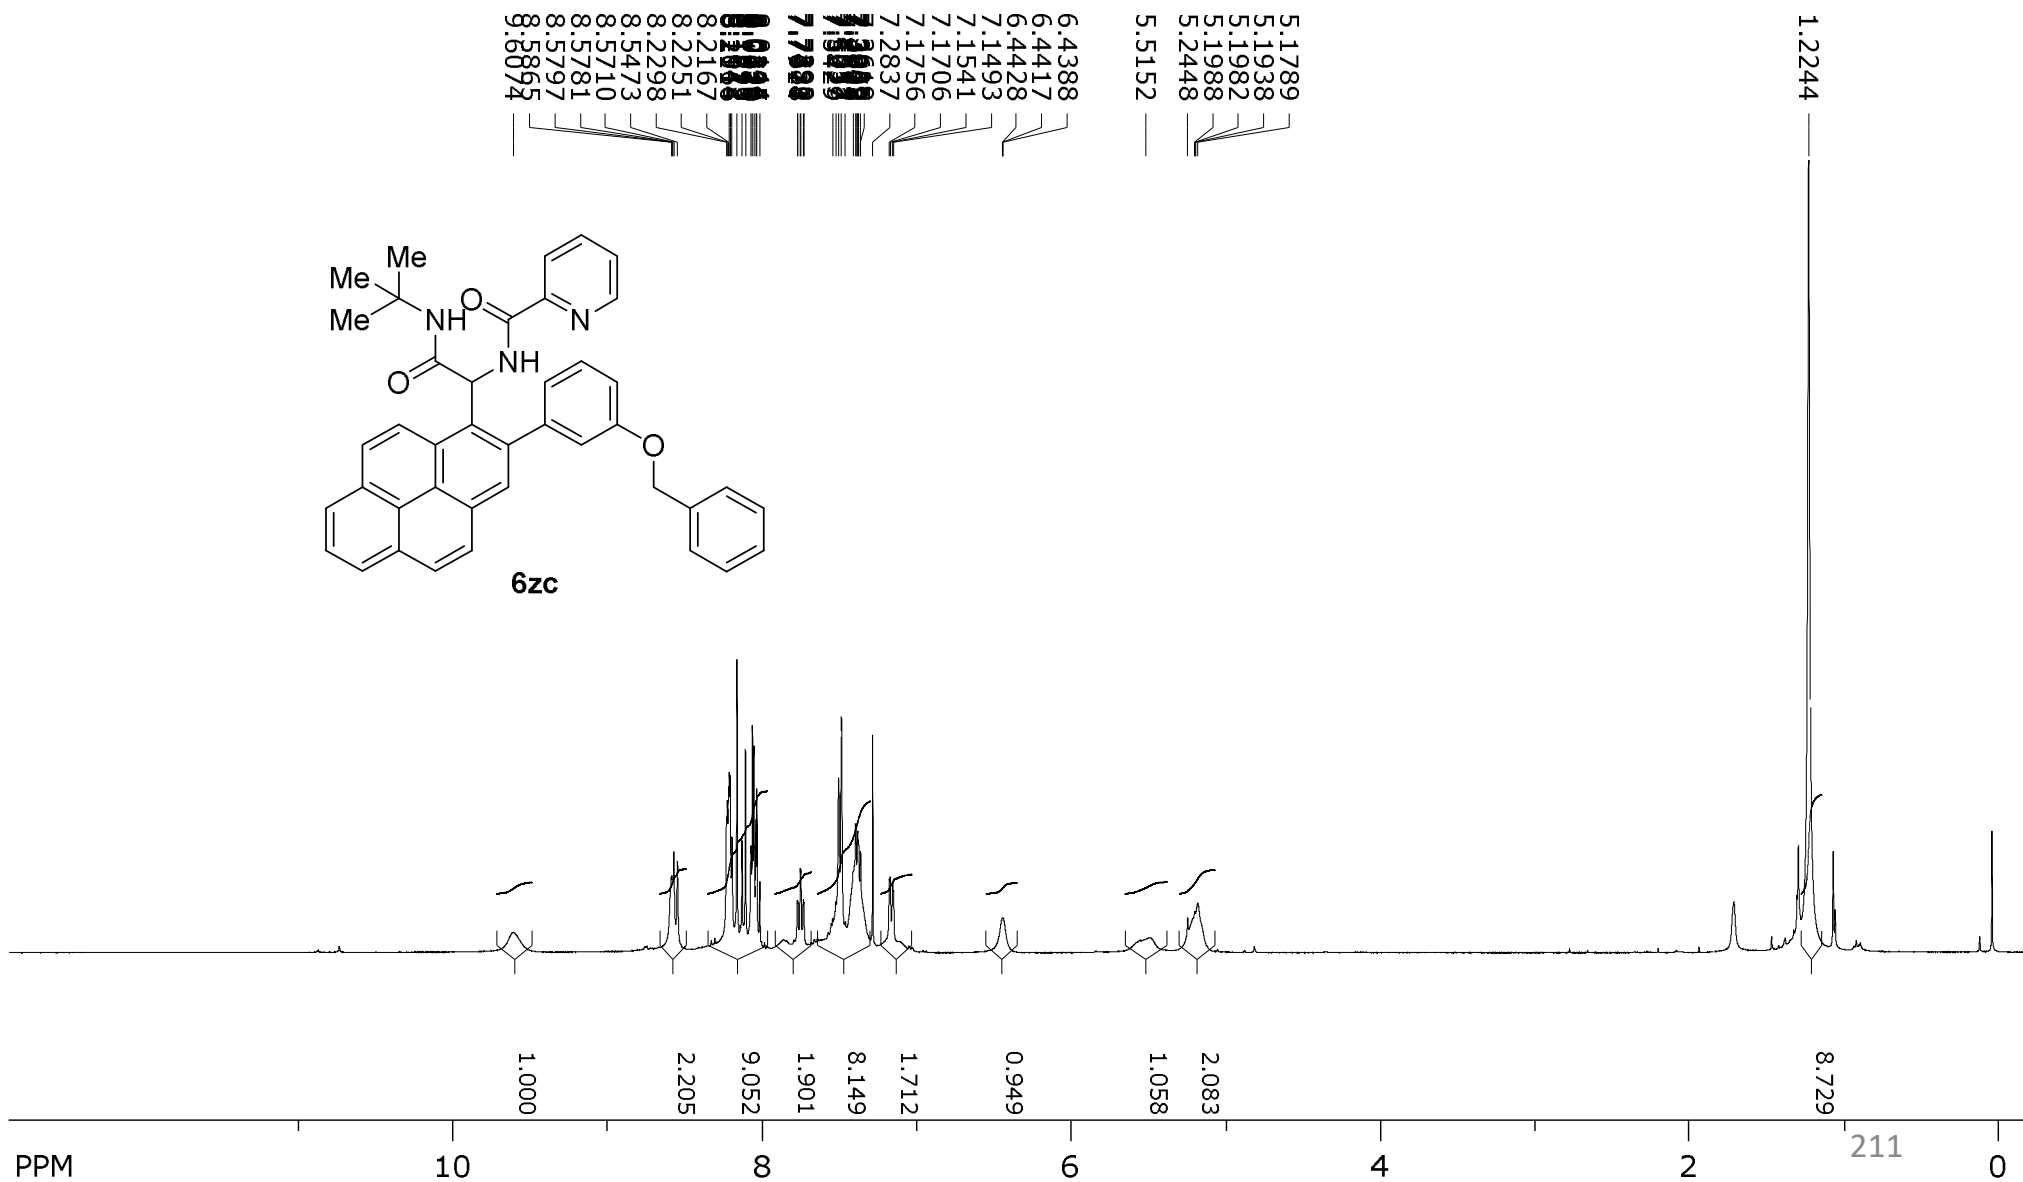

SpinWorks 4: AD-2178RE  
PROTON CDCl3 /opt/topspin3.5pl2/nmrdata nmrsu 53

8.5473  
8.5710  
8.5781  
8.5797  
8.5865

8.2298  
8.2251  
8.2167  
8.2116  
8.2064  
8.1943  
8.1622  
8.1293  
8.1070  
8.0716  
8.0619  
8.0526  
8.0335  
8.0144

7.7292  
7.7330  
7.7487  
7.7521  
7.7678  
7.7714

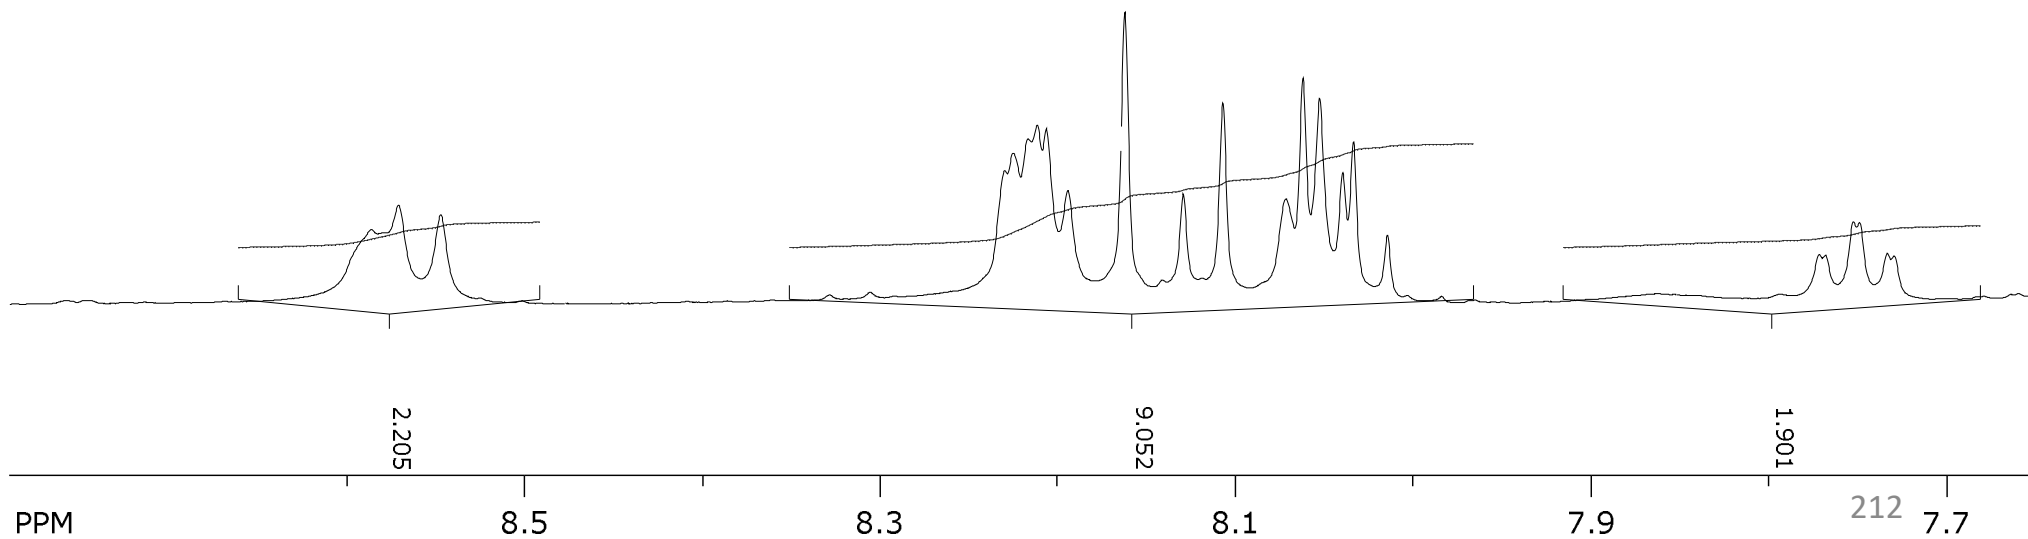

SpinWorks 4: AD-2178RE  
PROTON CDCl3 /opt/topspin3.5pl2/nmrdata nmrsu 53

7.4612  
7.4857  
7.5037  
7.5223  
7.5429

7.4097  
7.3925  
7.3822  
7.3802  
7.3759  
7.3635  
7.3619  
7.2837

7.1756  
7.1706  
7.1541  
7.1493

6.4428  
6.4417  
6.4388

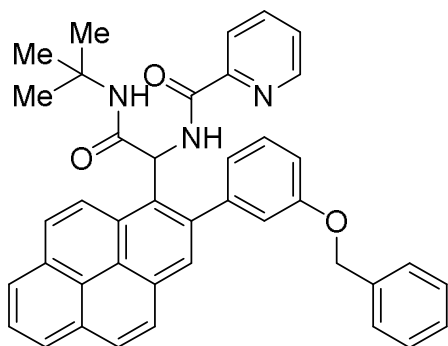

6zc

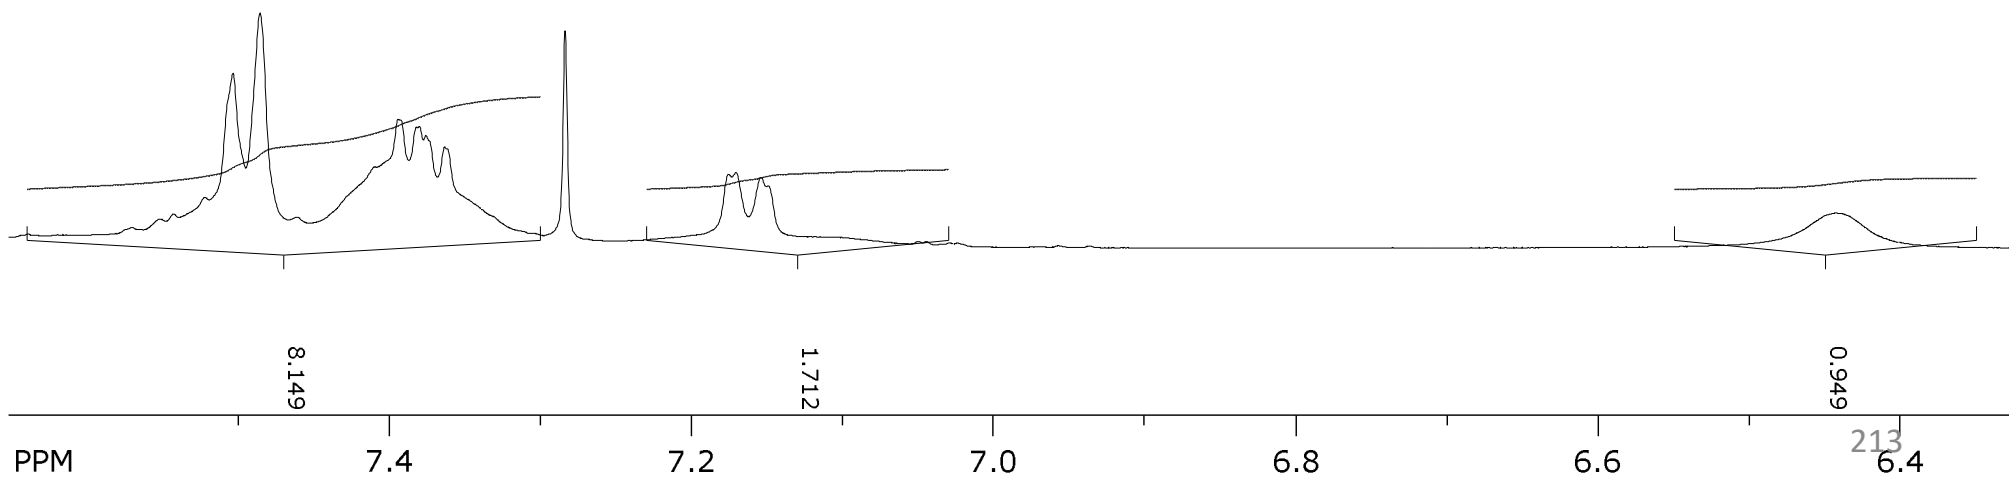

SpinWorks 4: AD-2178  
C13CPD256 CDCl3 /opt/topspin3.5pl2/nmrdata nmrsu 29

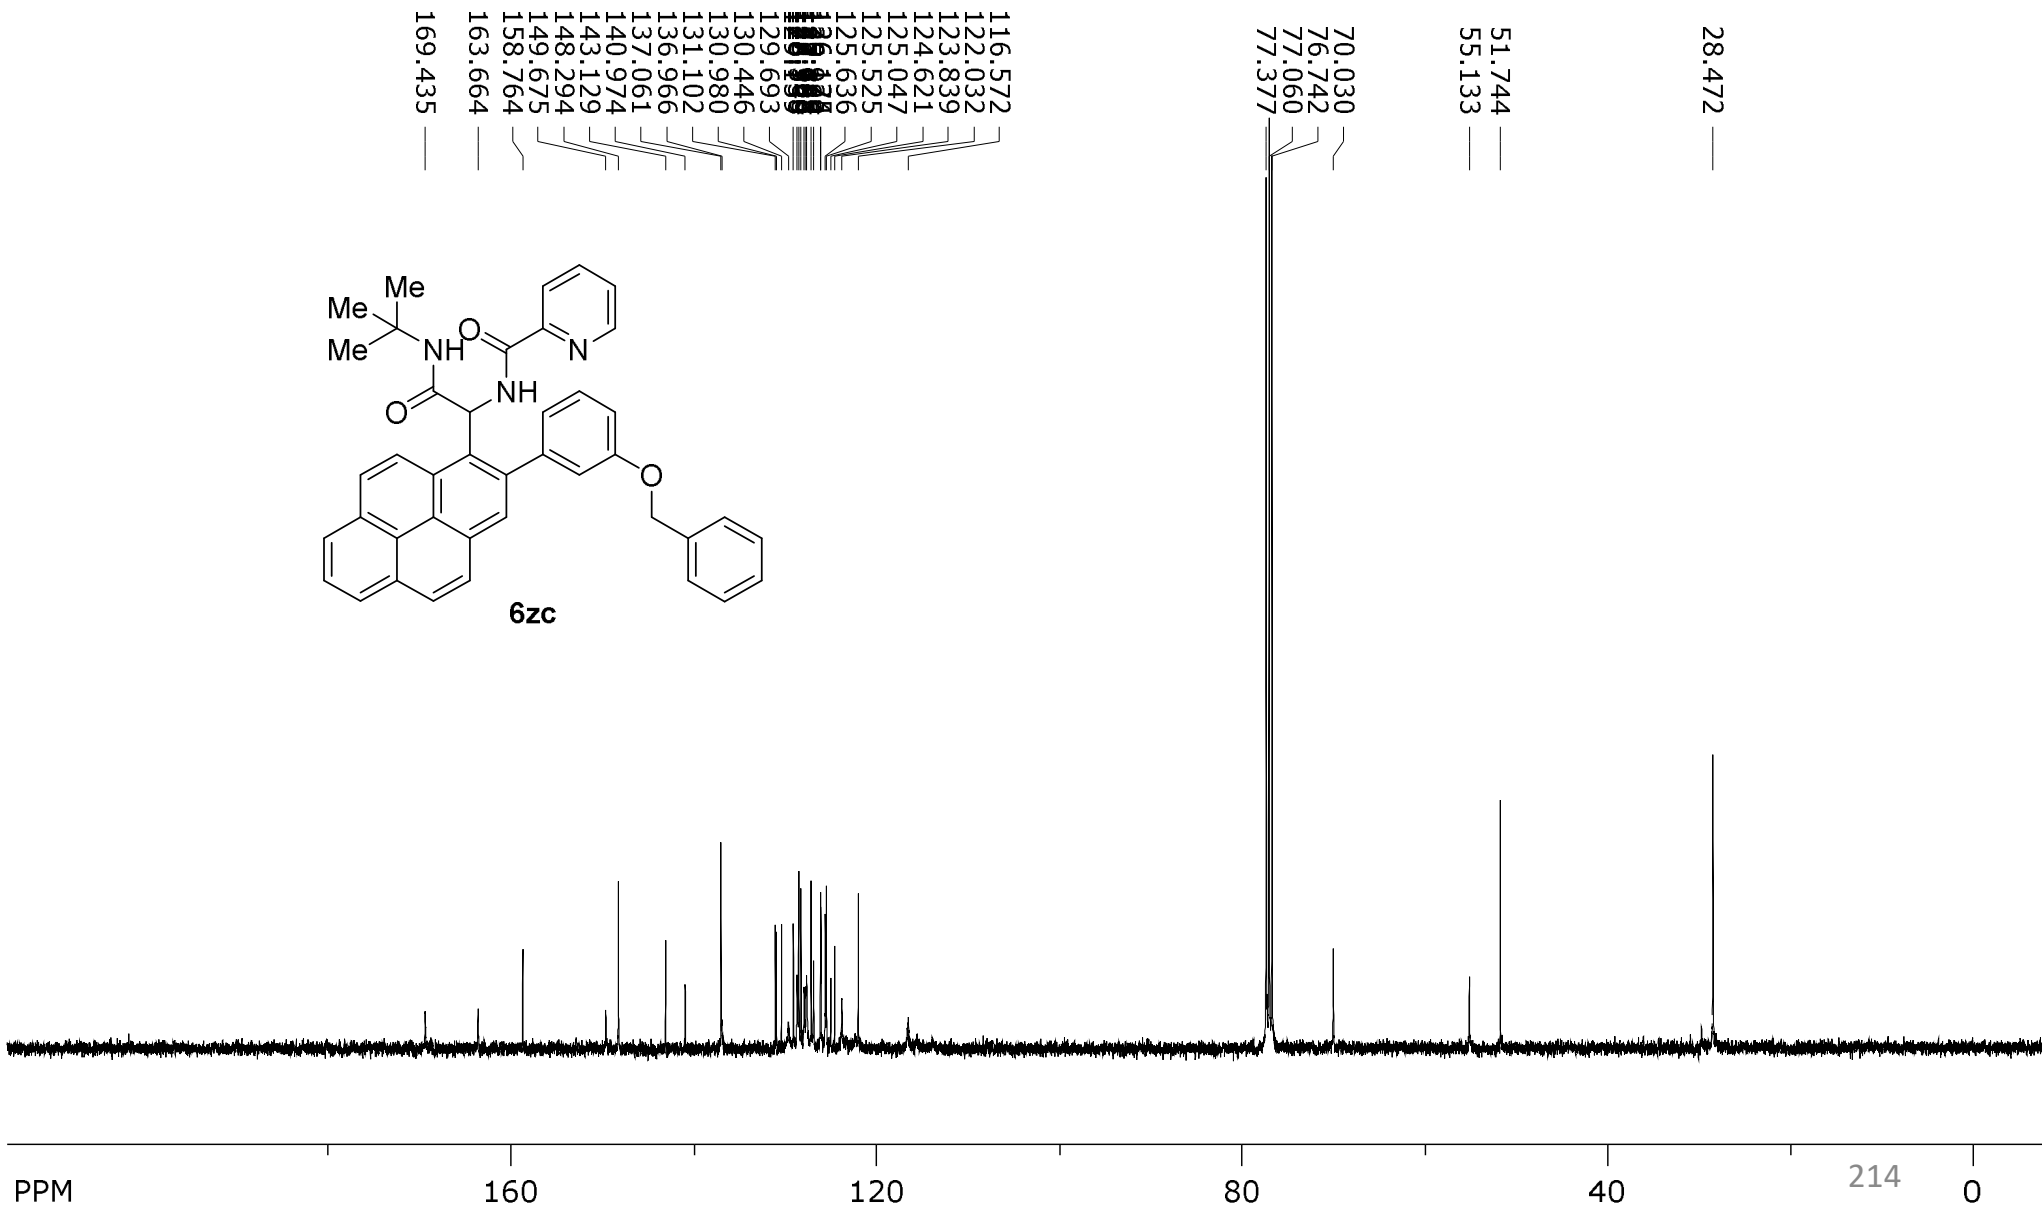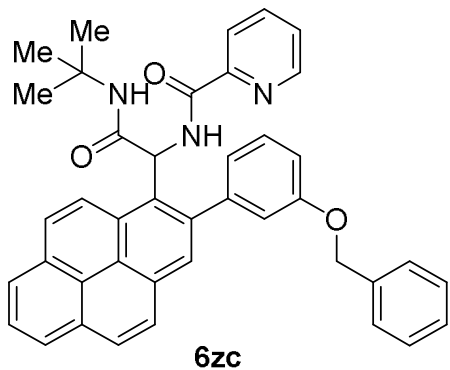

SpinWorks 4: AD-2178  
C13CPD256 CDCl3 /opt/topspin3.5pl2/nmrdata nmrsu 29

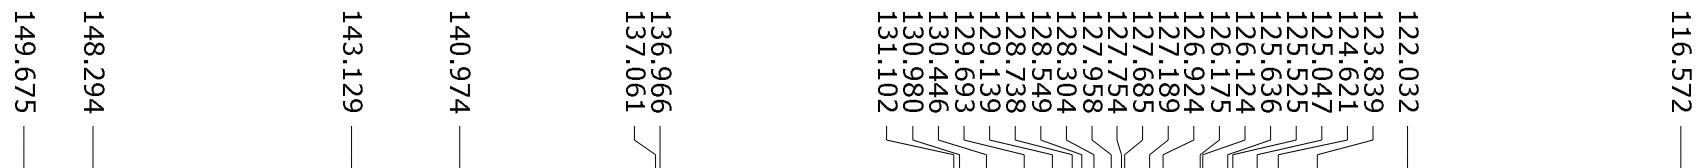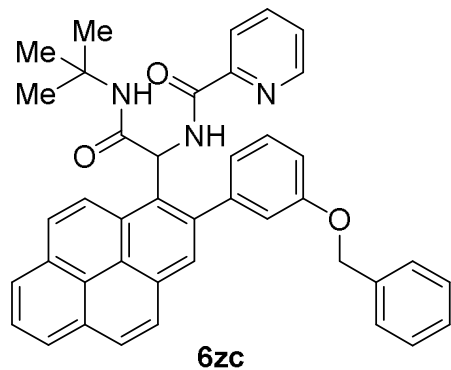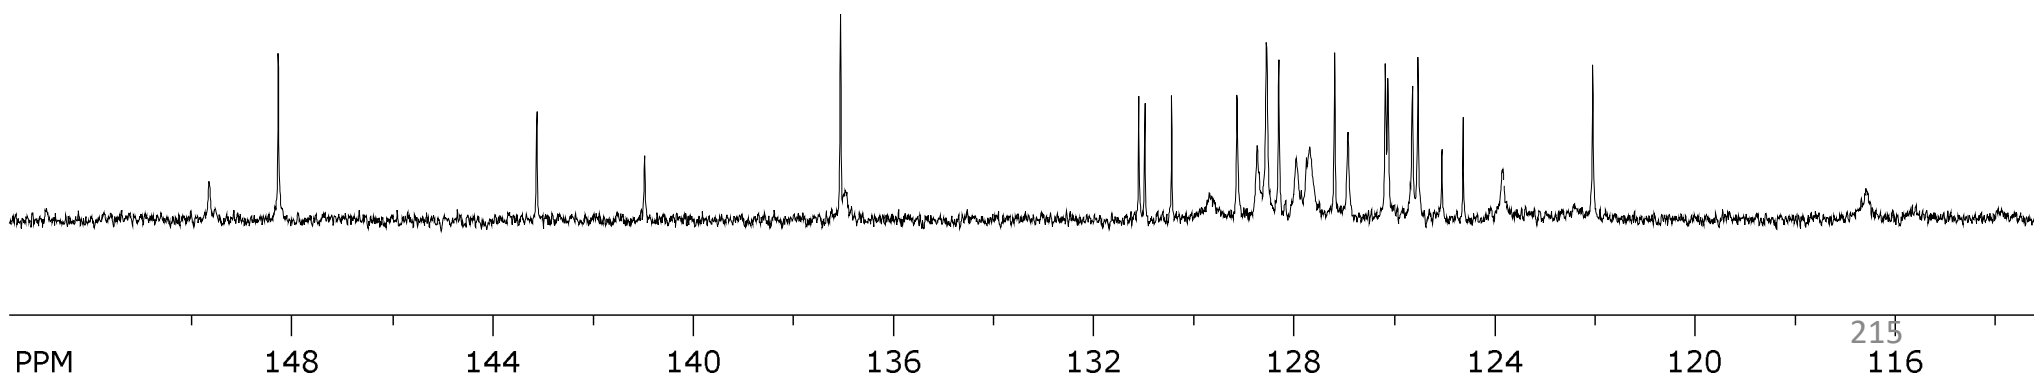

SpinWorks 4: AD-1976-Re  
PROTON CDCl3 /opt/topspin3.5pl2/nmrdata nmrsu 51

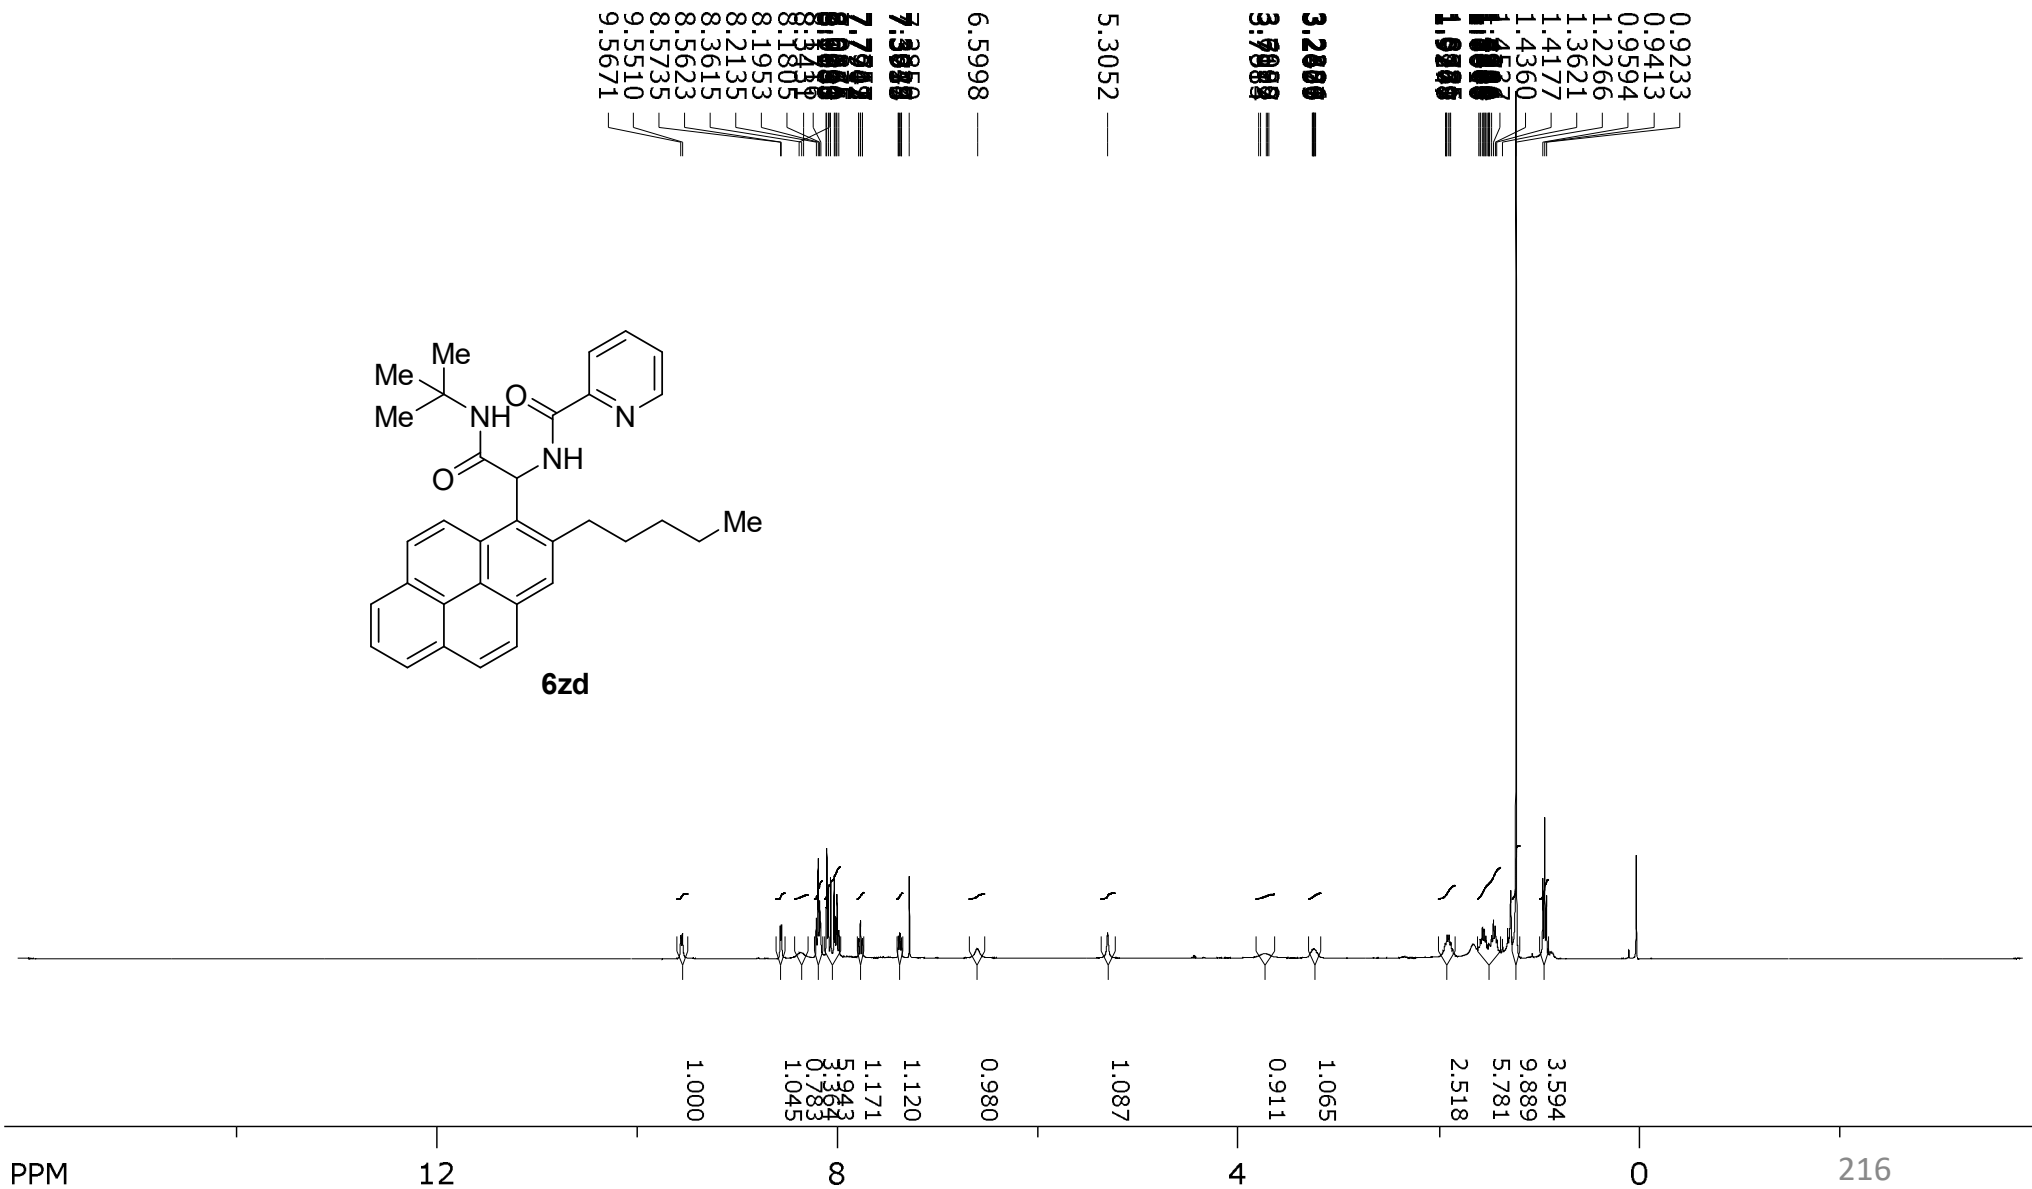



SpinWorks 4: AD-1976-Re  
PROTON CDCl3 /opt/topspin3.5pl2/nmrdata nmrsu 51

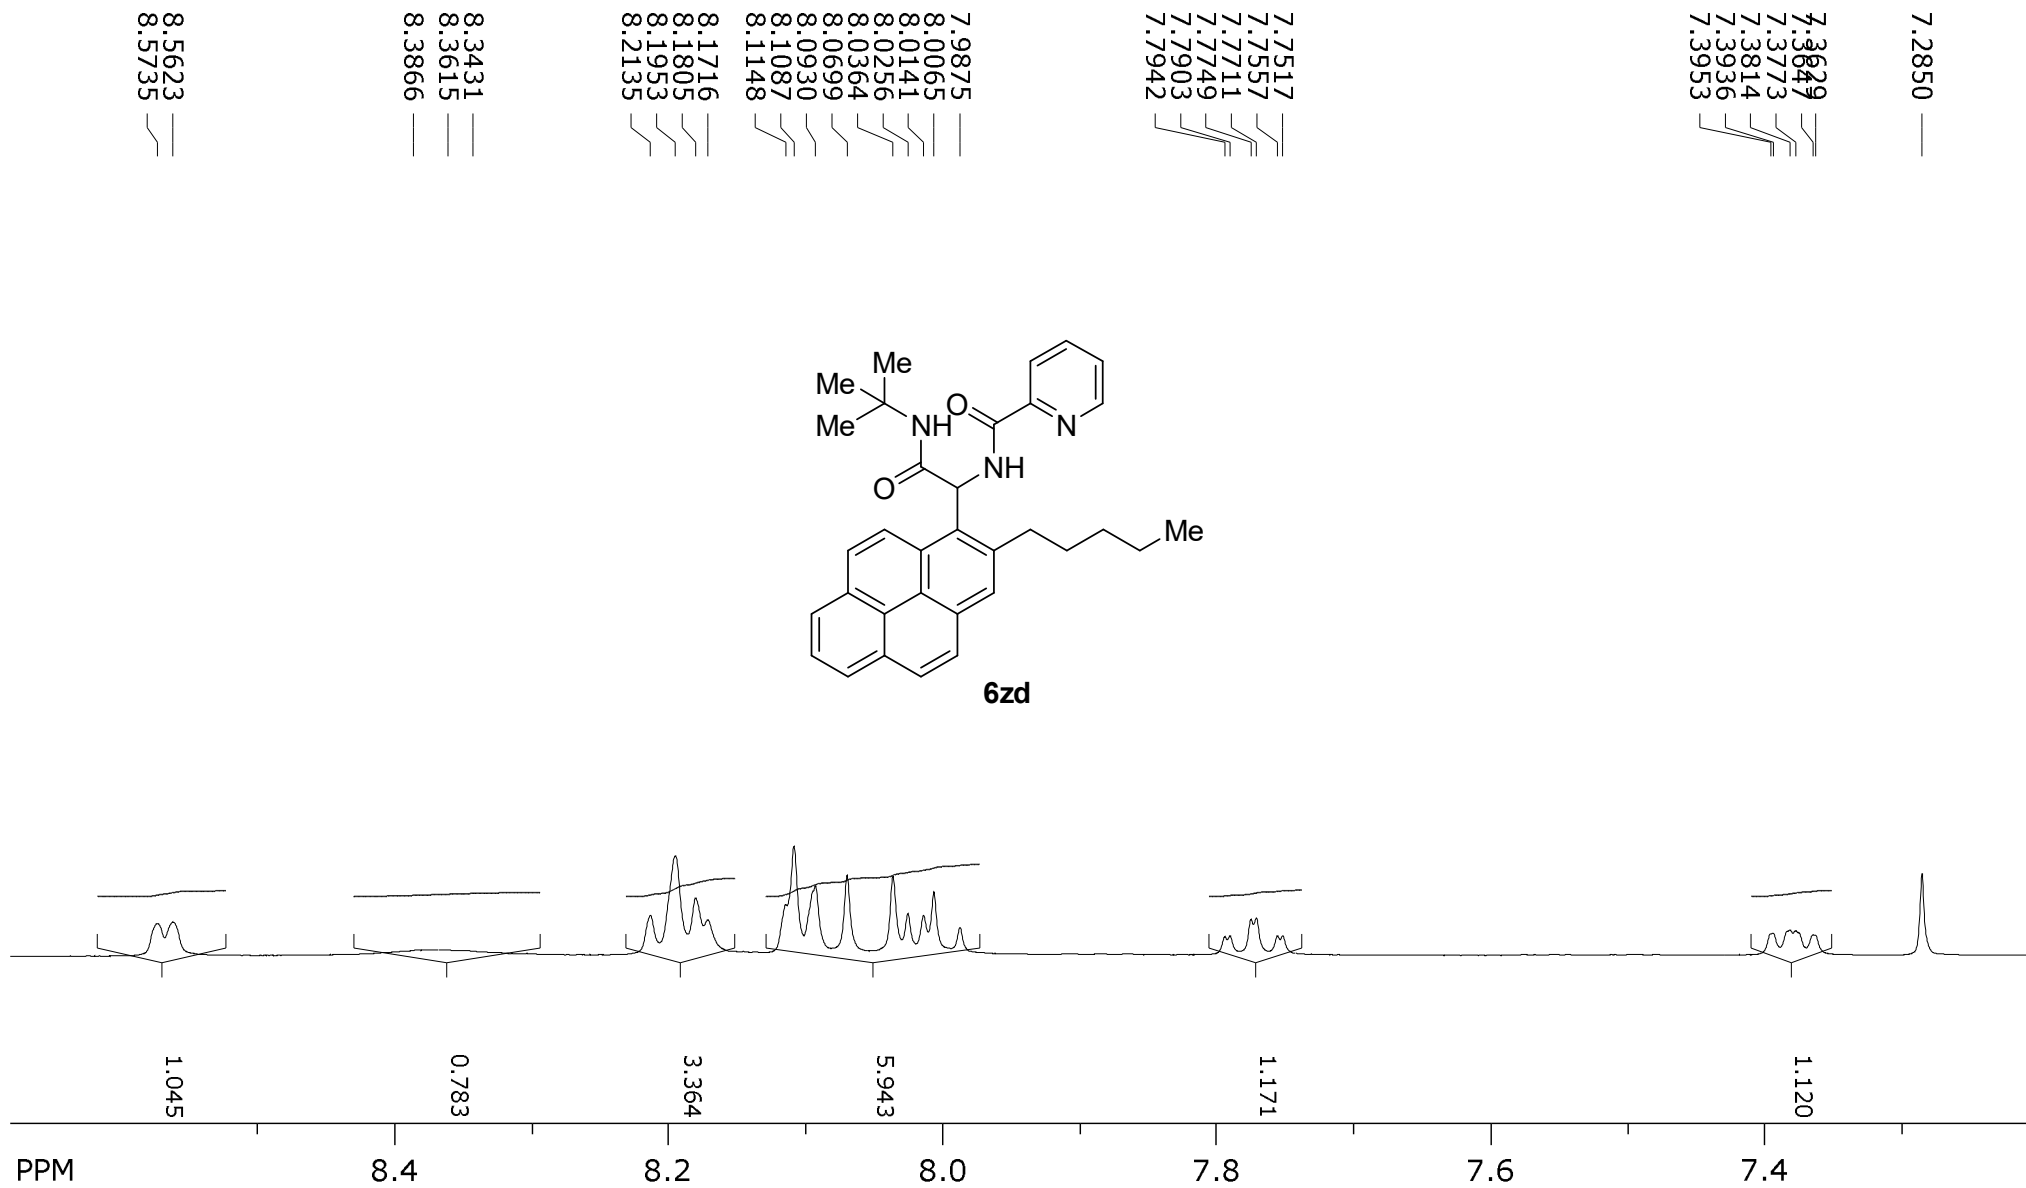

SpinWorks 4: AD-1976-Re  
PROTON CDCl3 /opt/topspin3.5pl2/nmrdata nmrsu 51

3.7813  
3.7984  
3.6928  
3.7057  
3.7199

3.2286  
3.2321  
3.2331  
3.2450  
3.2457  
3.2476  
3.2500  
3.2609  
3.2635

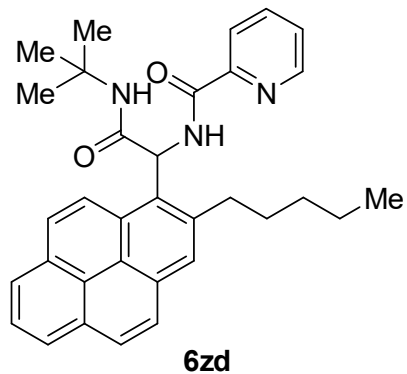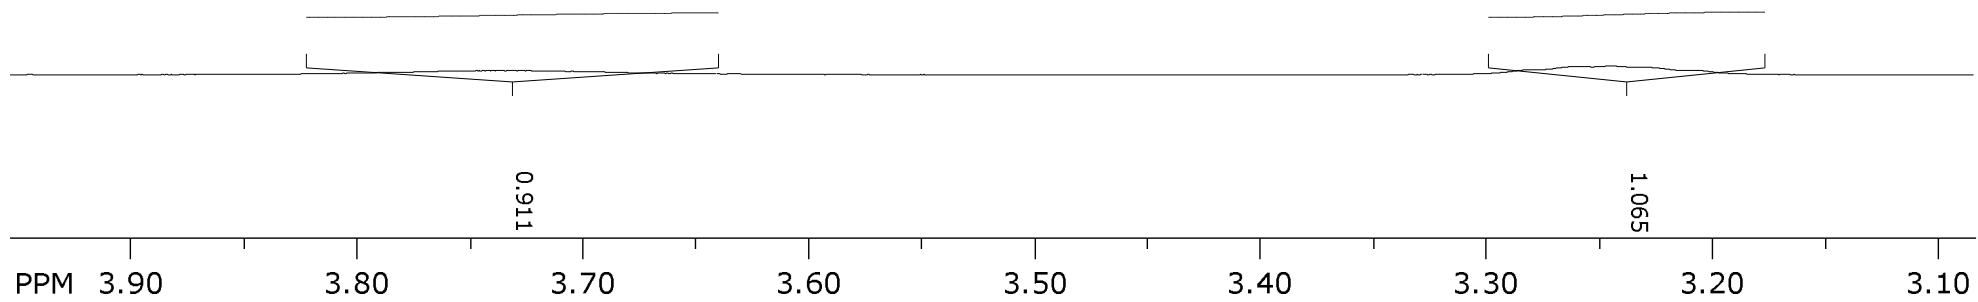

SpinWorks 4: AD-1976-Re  
PROTON CDCl3 /opt/topspin3.5pl2/nmrdata nmrsu 51

1.8785  
1.8825  
1.8971  
1.9159  
1.9279

1.3621  
1.4177  
1.4360  
1.4537  
1.4716  
1.4921  
1.4984  
1.5010  
1.5130  
1.5284  
1.5358  
1.5499  
1.5635  
1.5898  
1.6010

0.9233  
0.9413  
0.9594

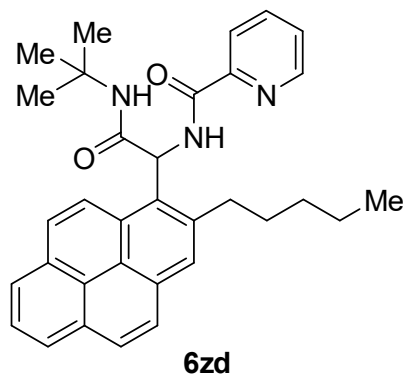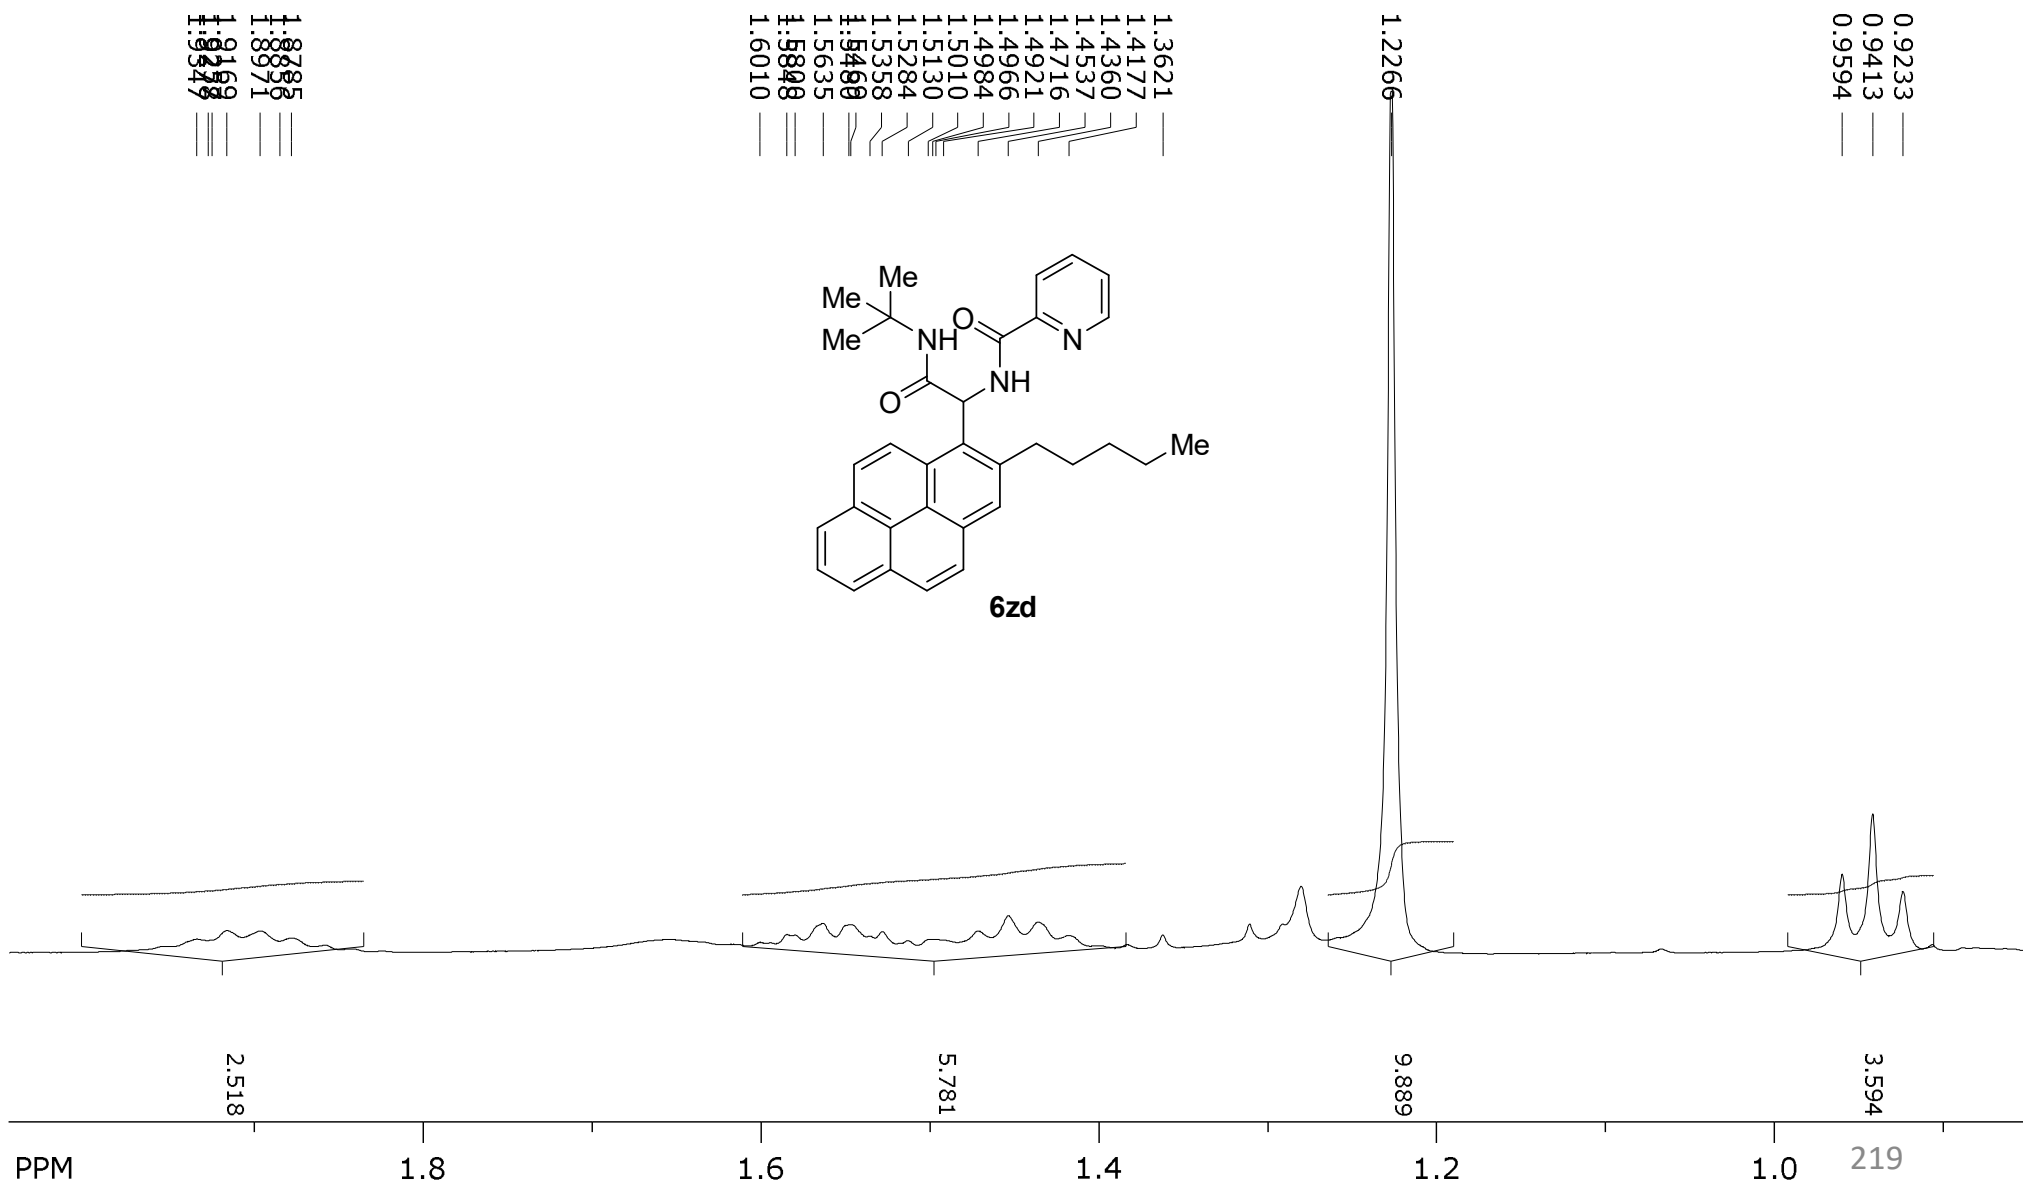

SpinWorks 4: AD\_1976 RE  
C13CPD256 CDCl3 /opt/topspin3.5pl2/nmrdata nmrsu 60

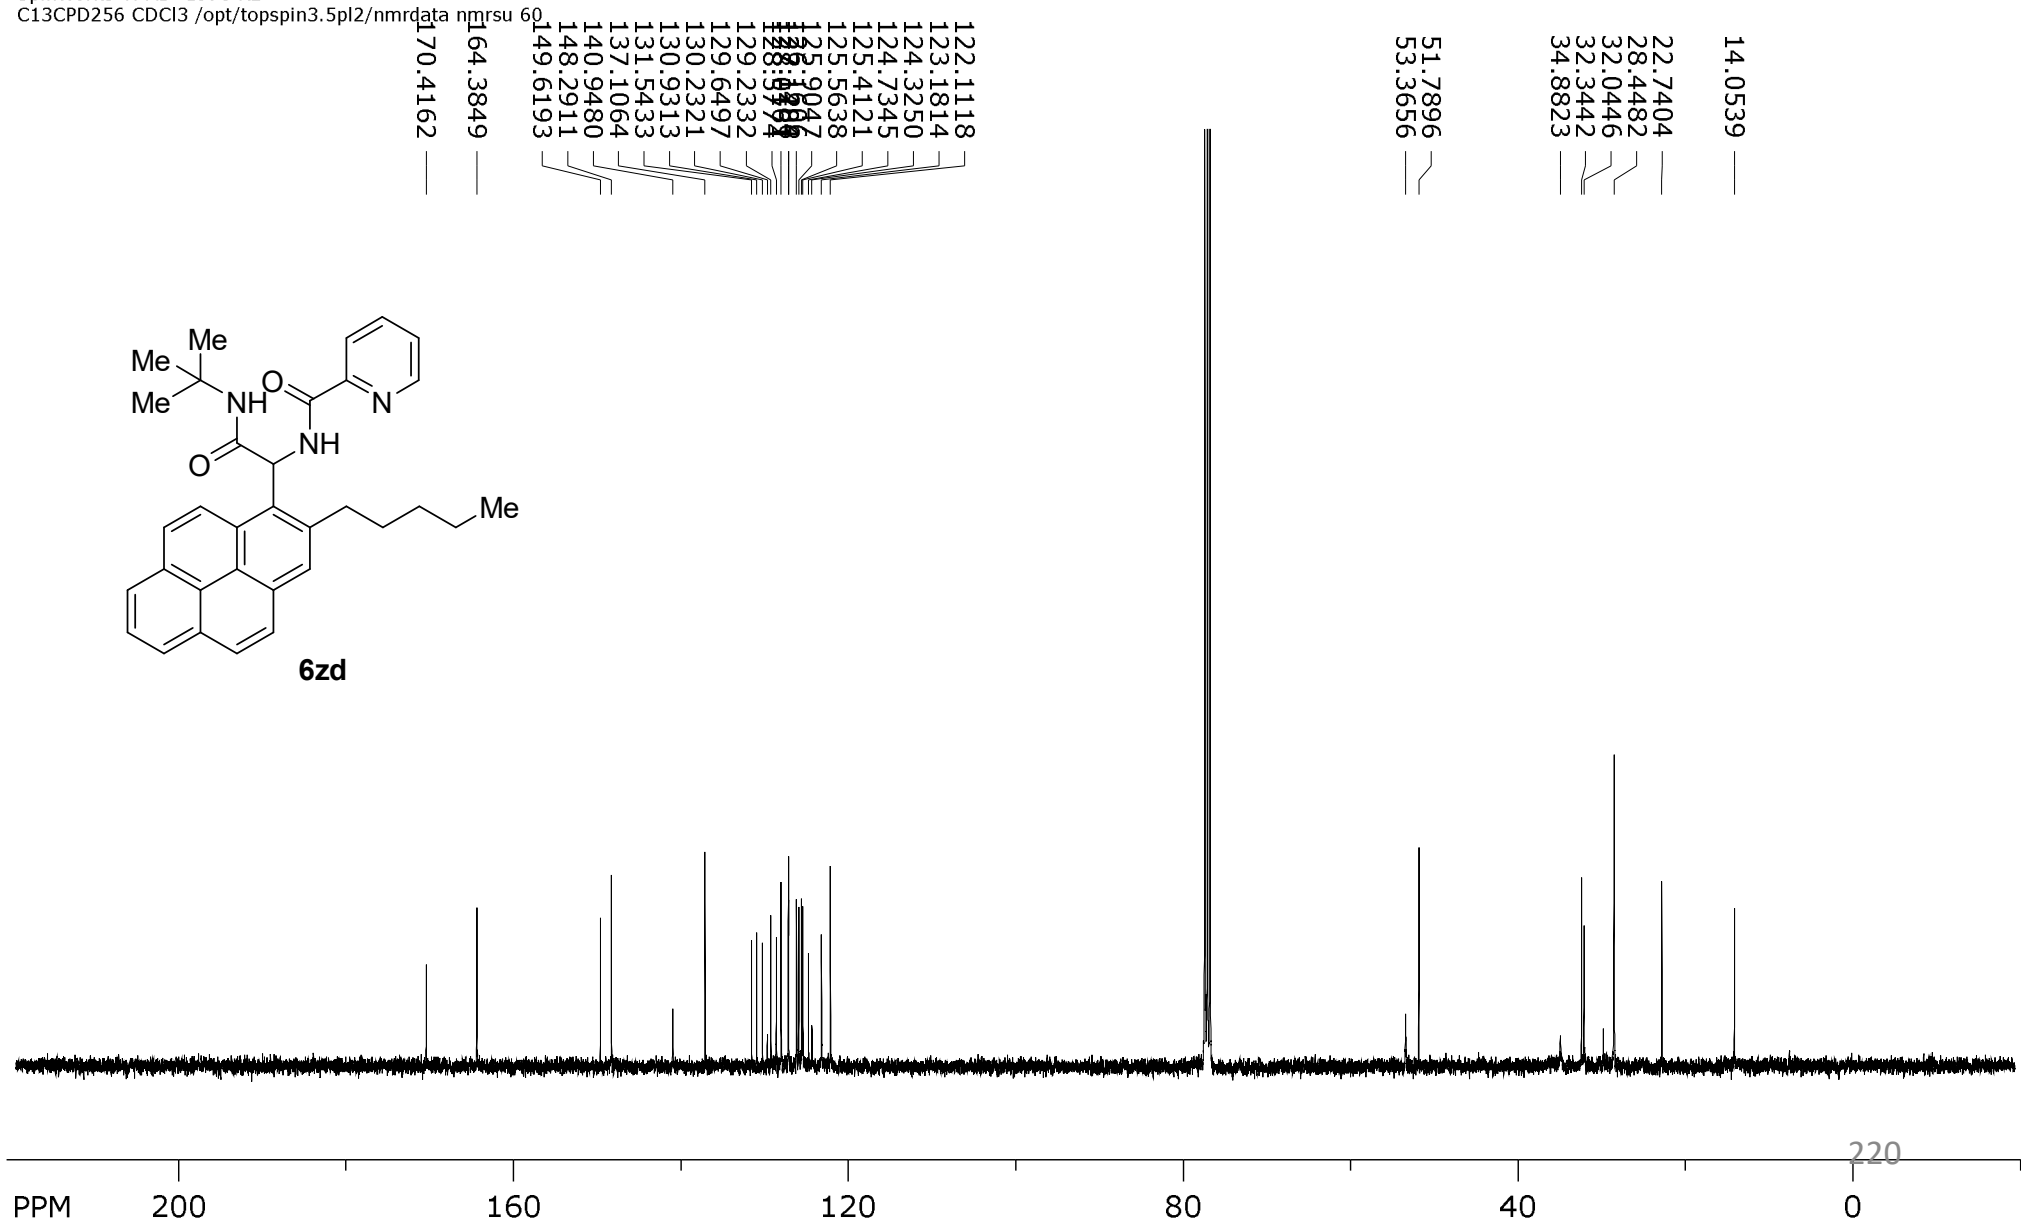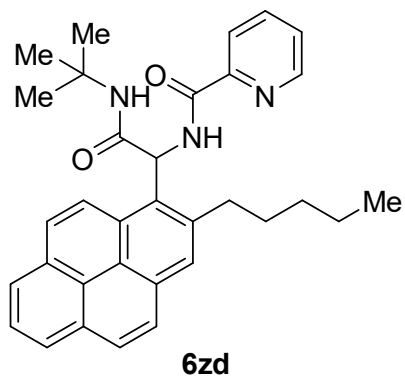

SpinWorks 4: AD 1976 RE  
C13CPD256 CDCl3 /opt/topspin3.5pl2/nmrdata nmrsu 60

149.6193  
148.2911

140.9480

137.1064

122.1118  
123.1814  
124.3250  
124.7345  
125.4121  
125.5638  
125.9047  
126.1606  
127.1204  
127.1486  
128.0161  
128.5774  
129.2332  
129.6497  
130.2321  
130.9313  
131.5433

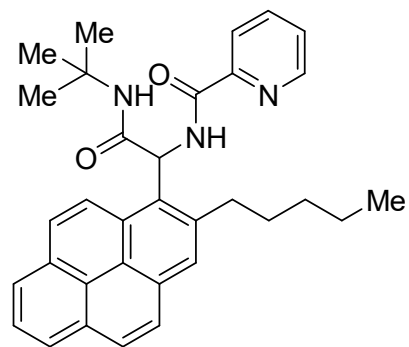

6zd

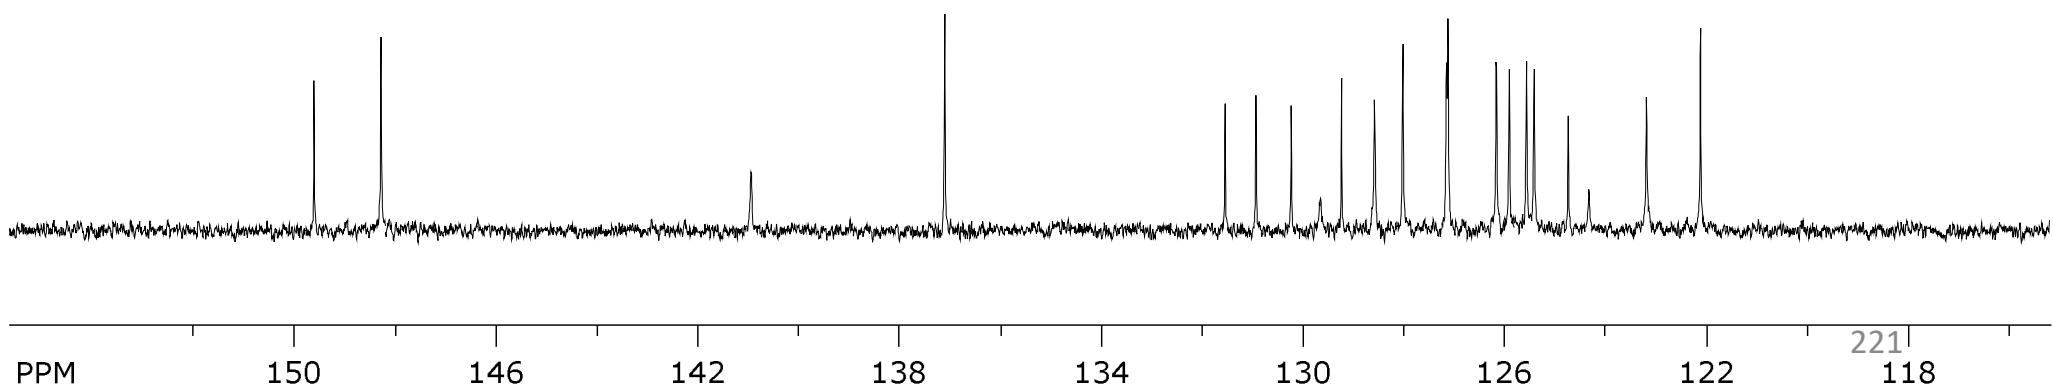

SpinWorks 4: AD-1927A  
PROTON CDCl3 /opt/topspin3.5pl2/nmrdata nmrsu 13

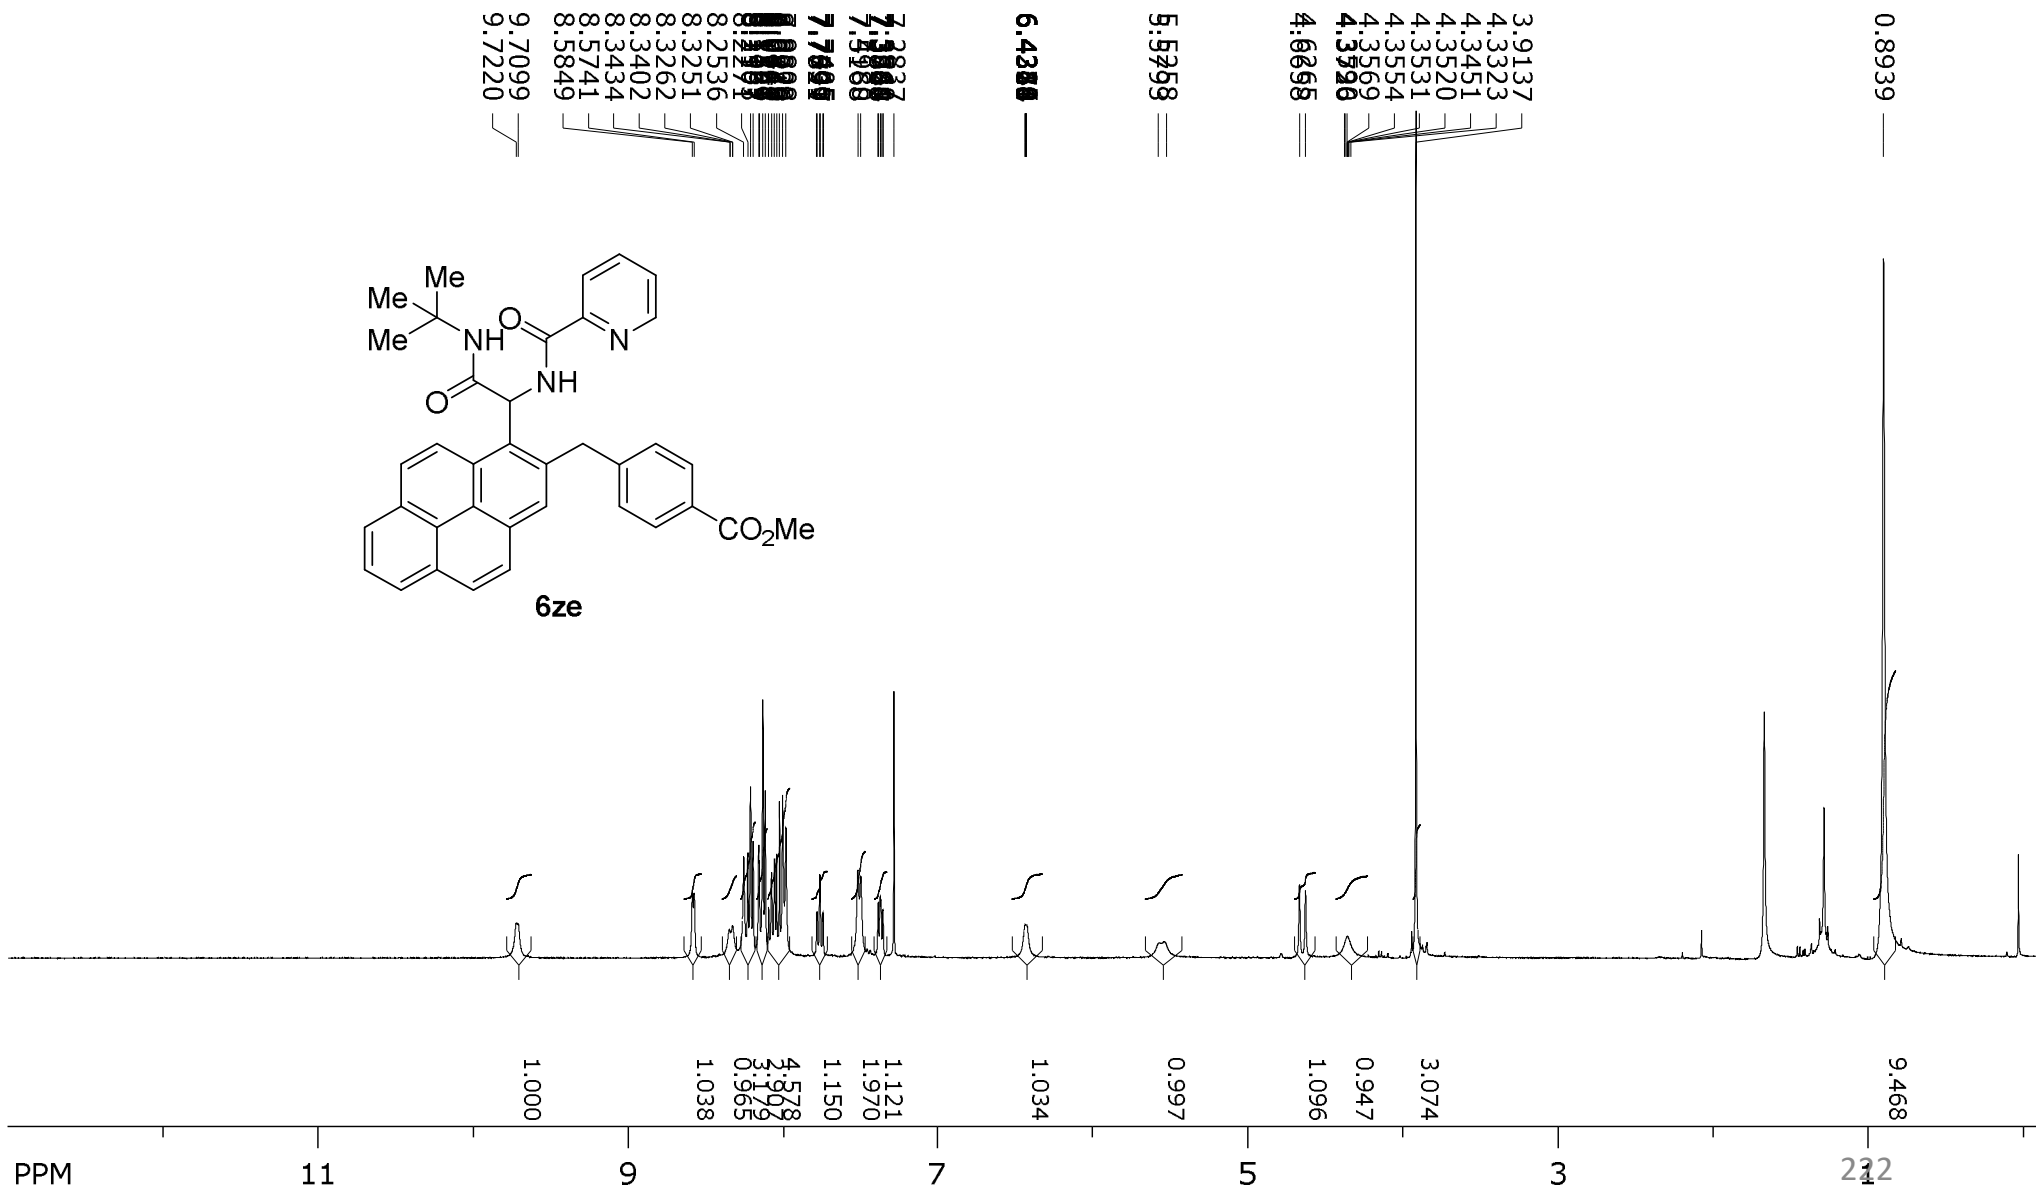

SpinWorks 4: AD-1927A  
PROTON CDCl3 /opt/topspin3.5pl2/nmrdata nmrsu 13

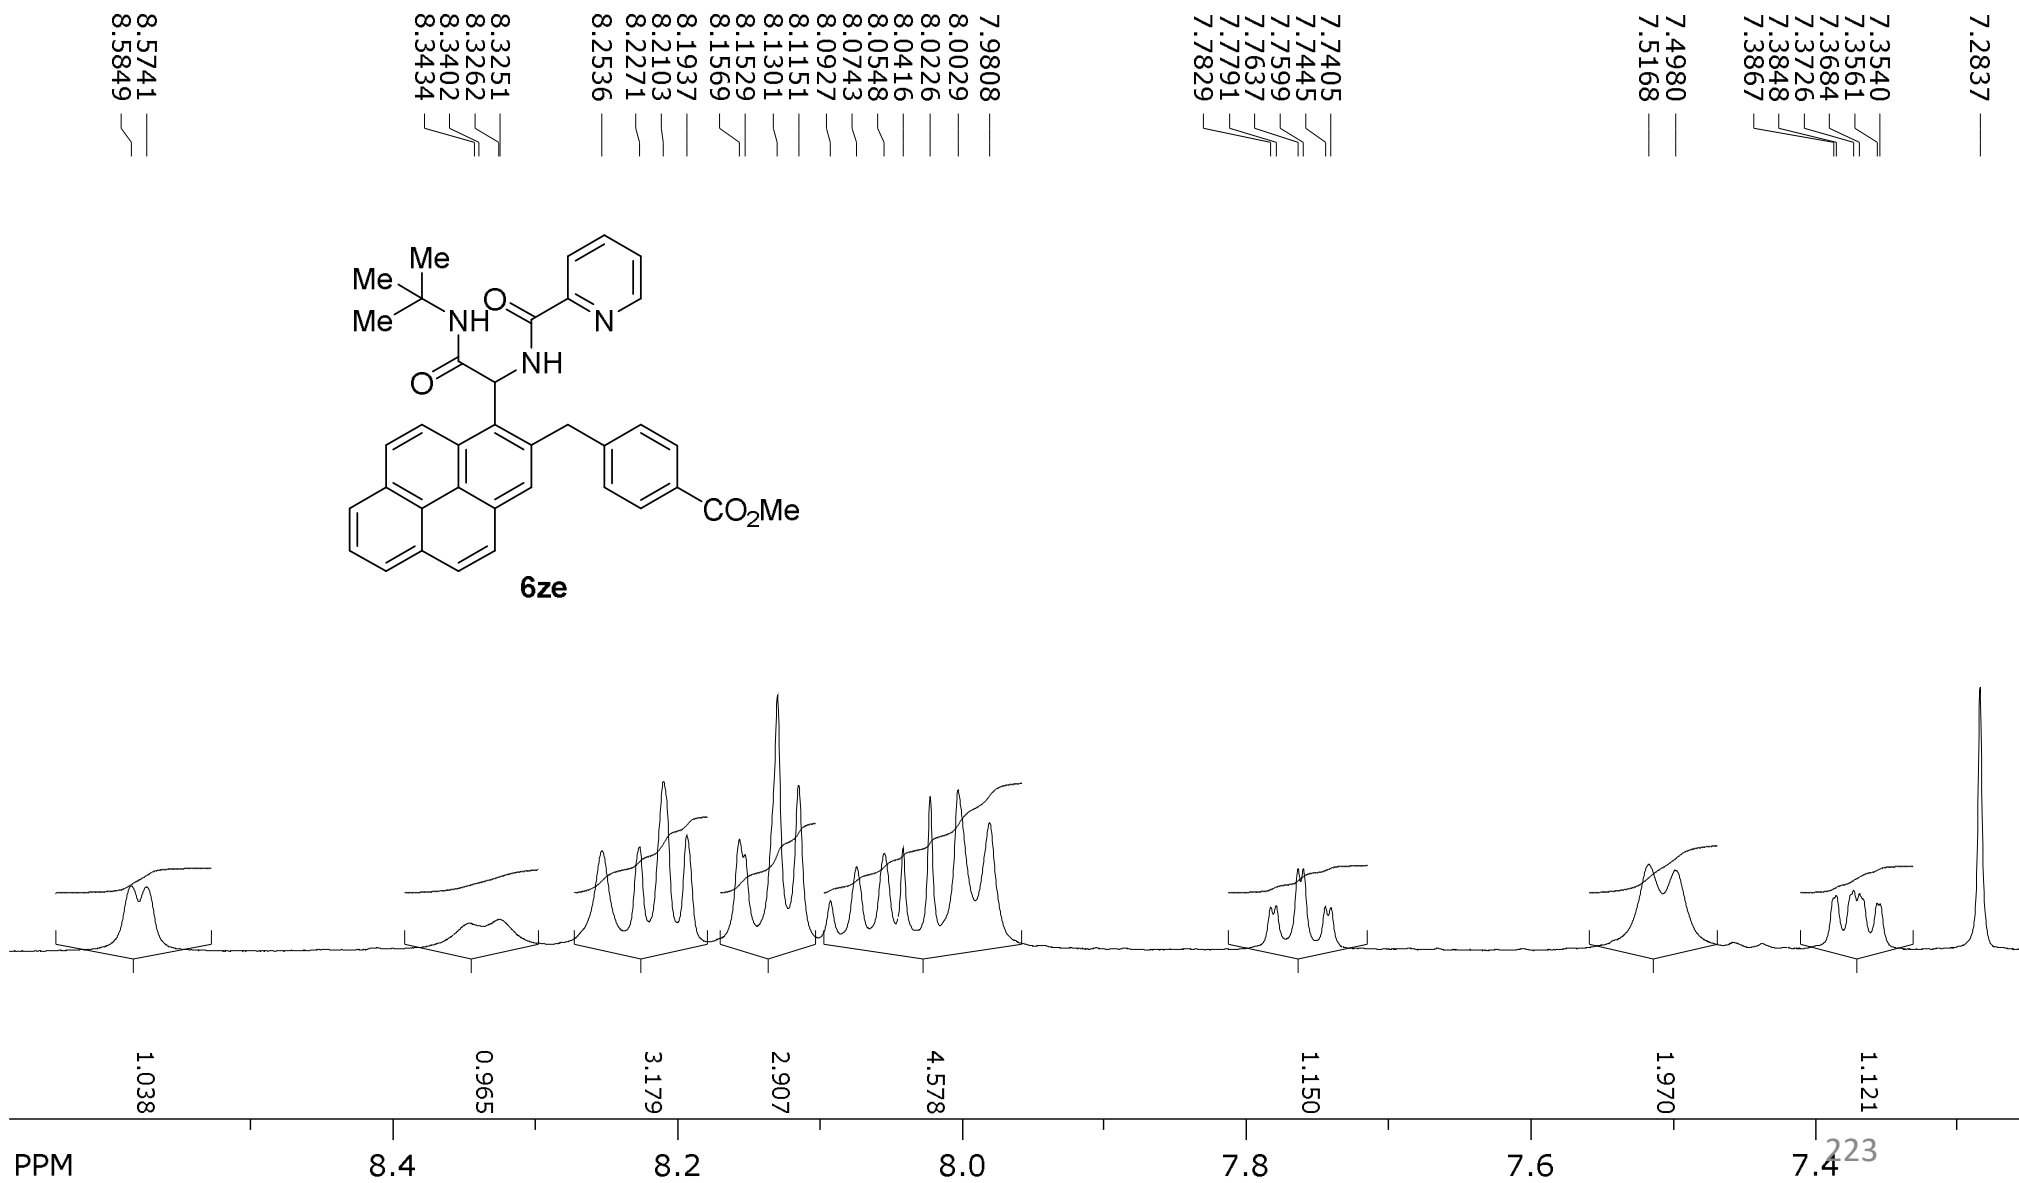

SpinWorks 4: AD-1927A  
PROTON CDCl3 /opt/topspin3.5pl2/nmrdata nmrsu 13

6.4270  
6.4364

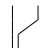

5.5258  
5.5793

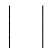

4.6265  
4.6658

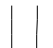

4.3323  
4.3451  
4.3726  
4.3736

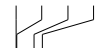

3.9137

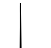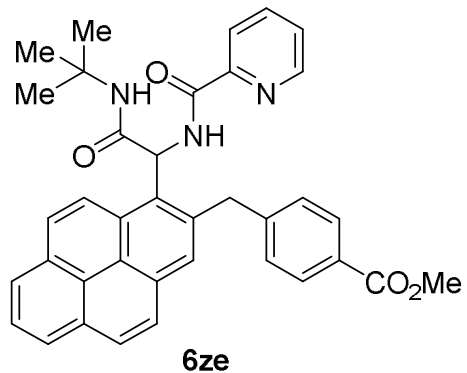

1.034

0.997

1.096

0.947

3.074

PPM

6.4

6.0

5.6

5.2

4.8

4.4

4.0

2.24

3.6





SpinWorks 4: AD-1927A  
C13CPD256 CDCl3 /opt/topspin3.5pl2/nmrdata nmrsu 13

149.5640  
148.3844  
147.4427

137.0806

128.1462  
128.3941  
128.4164  
128.7820  
129.0730  
130.0216  
130.2815  
130.4298  
130.5457  
130.9515  
131.6580  
127.0455  
126.1966  
126.1525  
125.8003  
125.6657  
124.9708  
124.5821  
123.1362  
121.9366

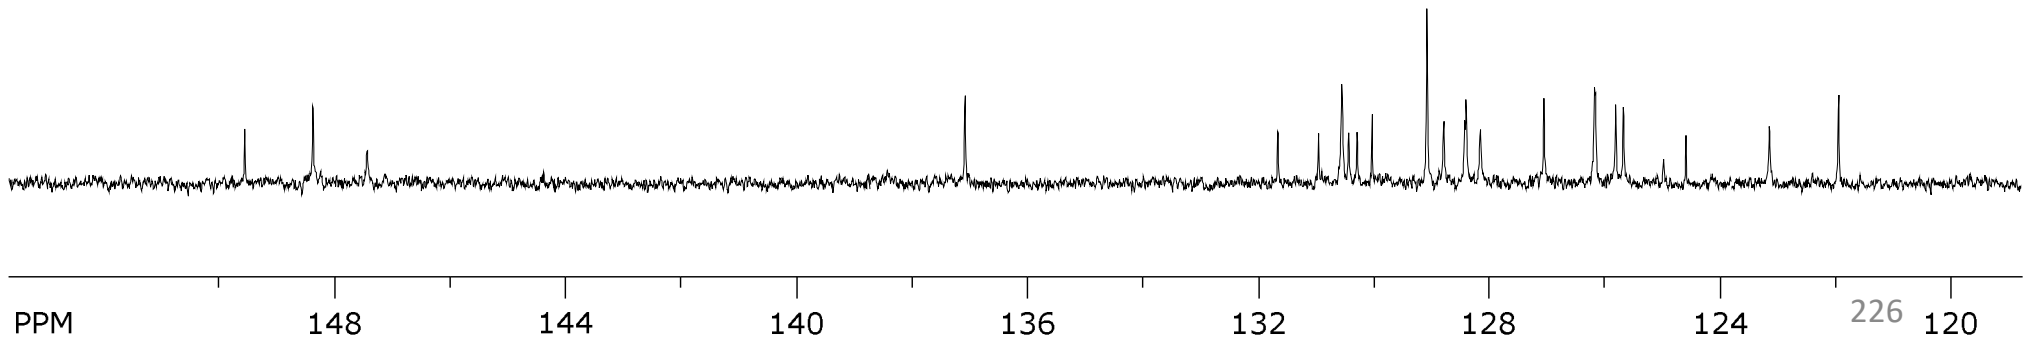

SpinWorks 4: AD 1942 A  
PROTON CDCl3 /opt/topspin3.5pl2/nmrdata nmrsu 54

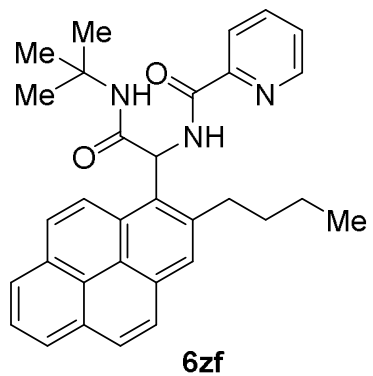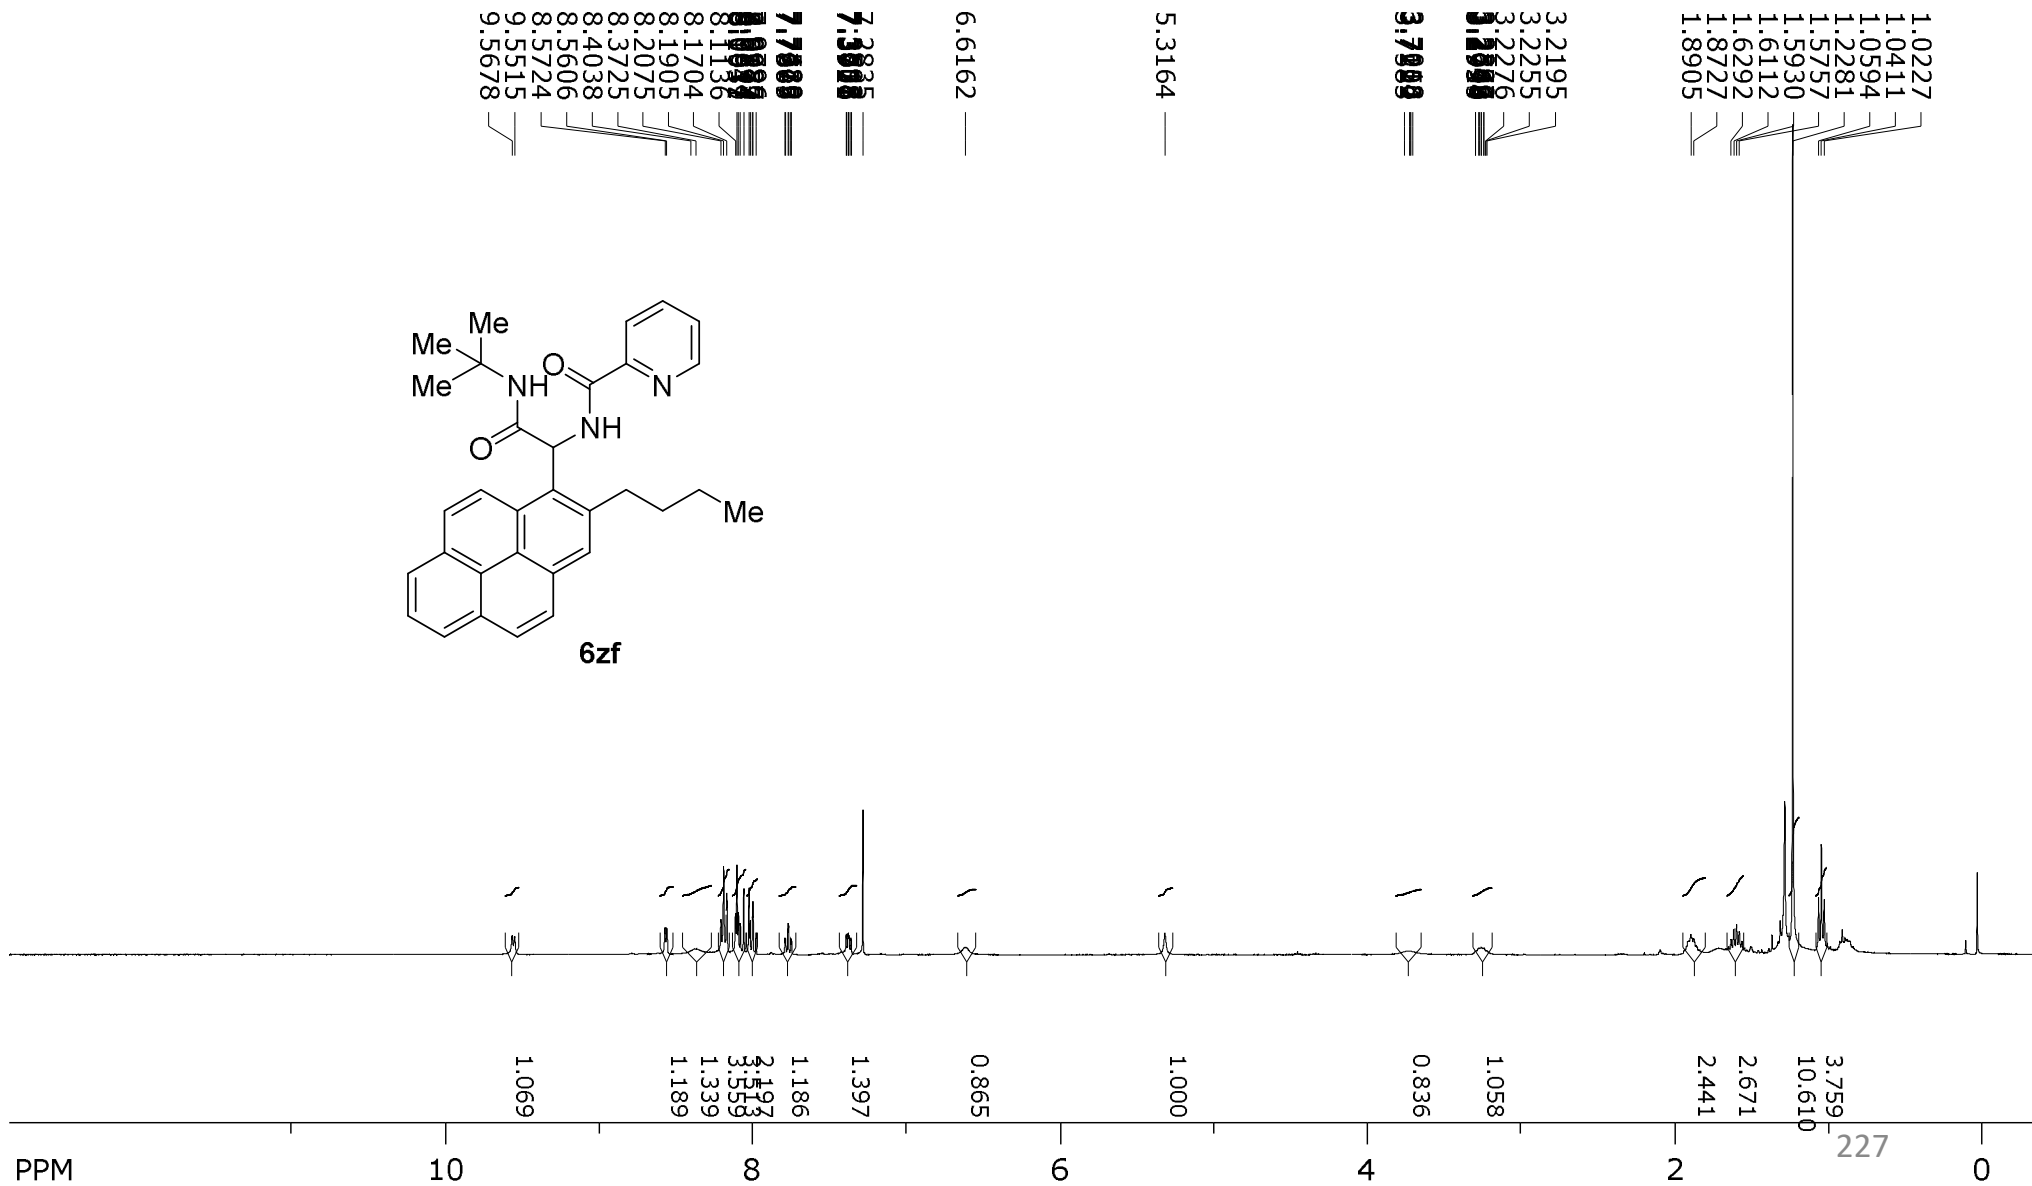

SpinWorks 4: AD 1942 A  
PROTON CDCl3 /opt/topspin3.5pl2/nmrdata nmrsu 54

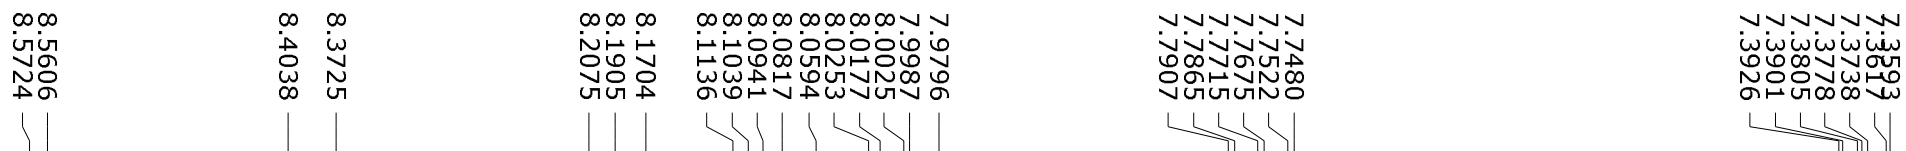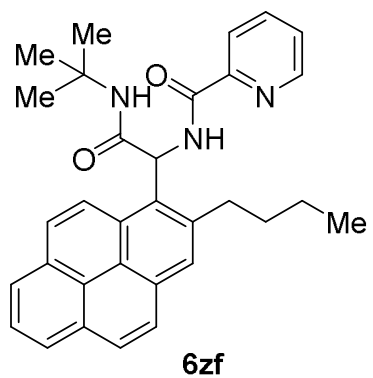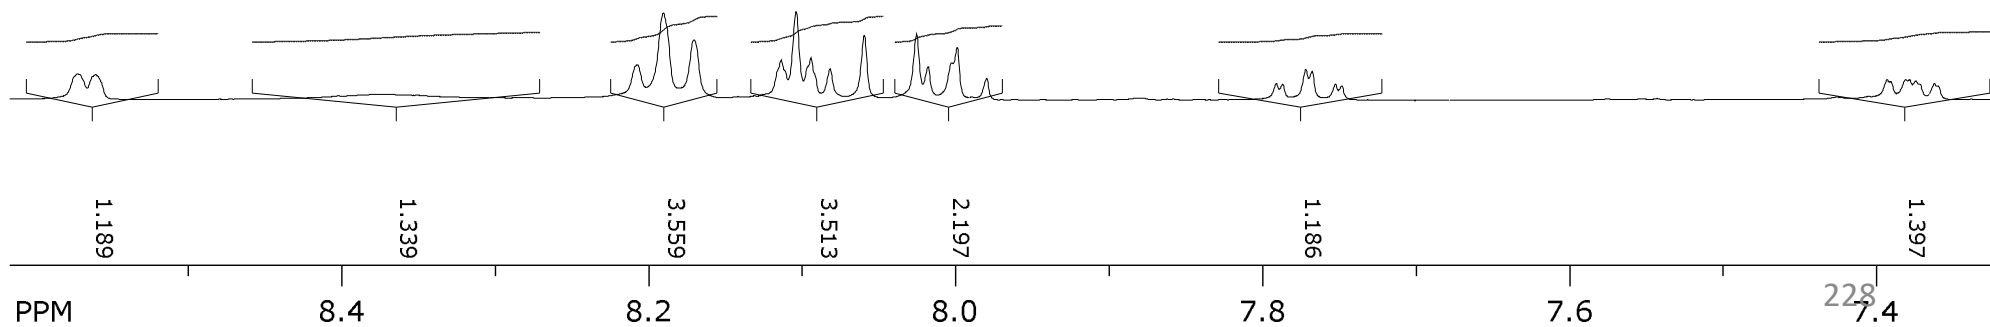

SpinWorks 4: AD 1942 A  
PROTON CDCl3 /opt/topspin3.5pl2/nmrdata nmrsu 54

3.7583 —  
3.7222  
3.7204  
3.7150  
3.7018

3.2195  
3.2255  
3.2276  
3.2377  
3.2393  
3.2549  
3.2566  
3.2698  
3.2743  
3.2924  
3.2935

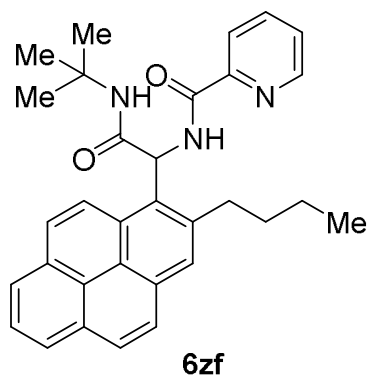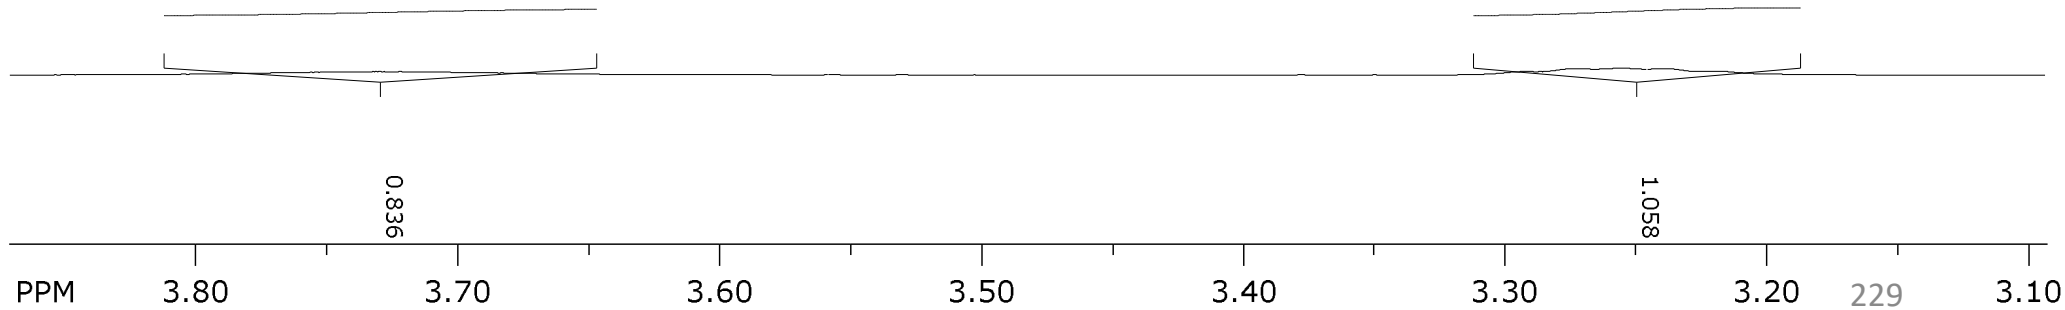

SpinWorks 4: AD 1942 A  
PROTON CDCl3 /opt/topspin3.5pl2/nmrdata nmrsu 54

1.8727  
1.8905

1.5757  
1.5930  
1.6112  
1.6292

1.2281

1.0227  
1.0411  
1.0594

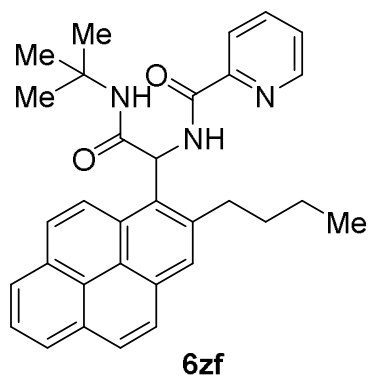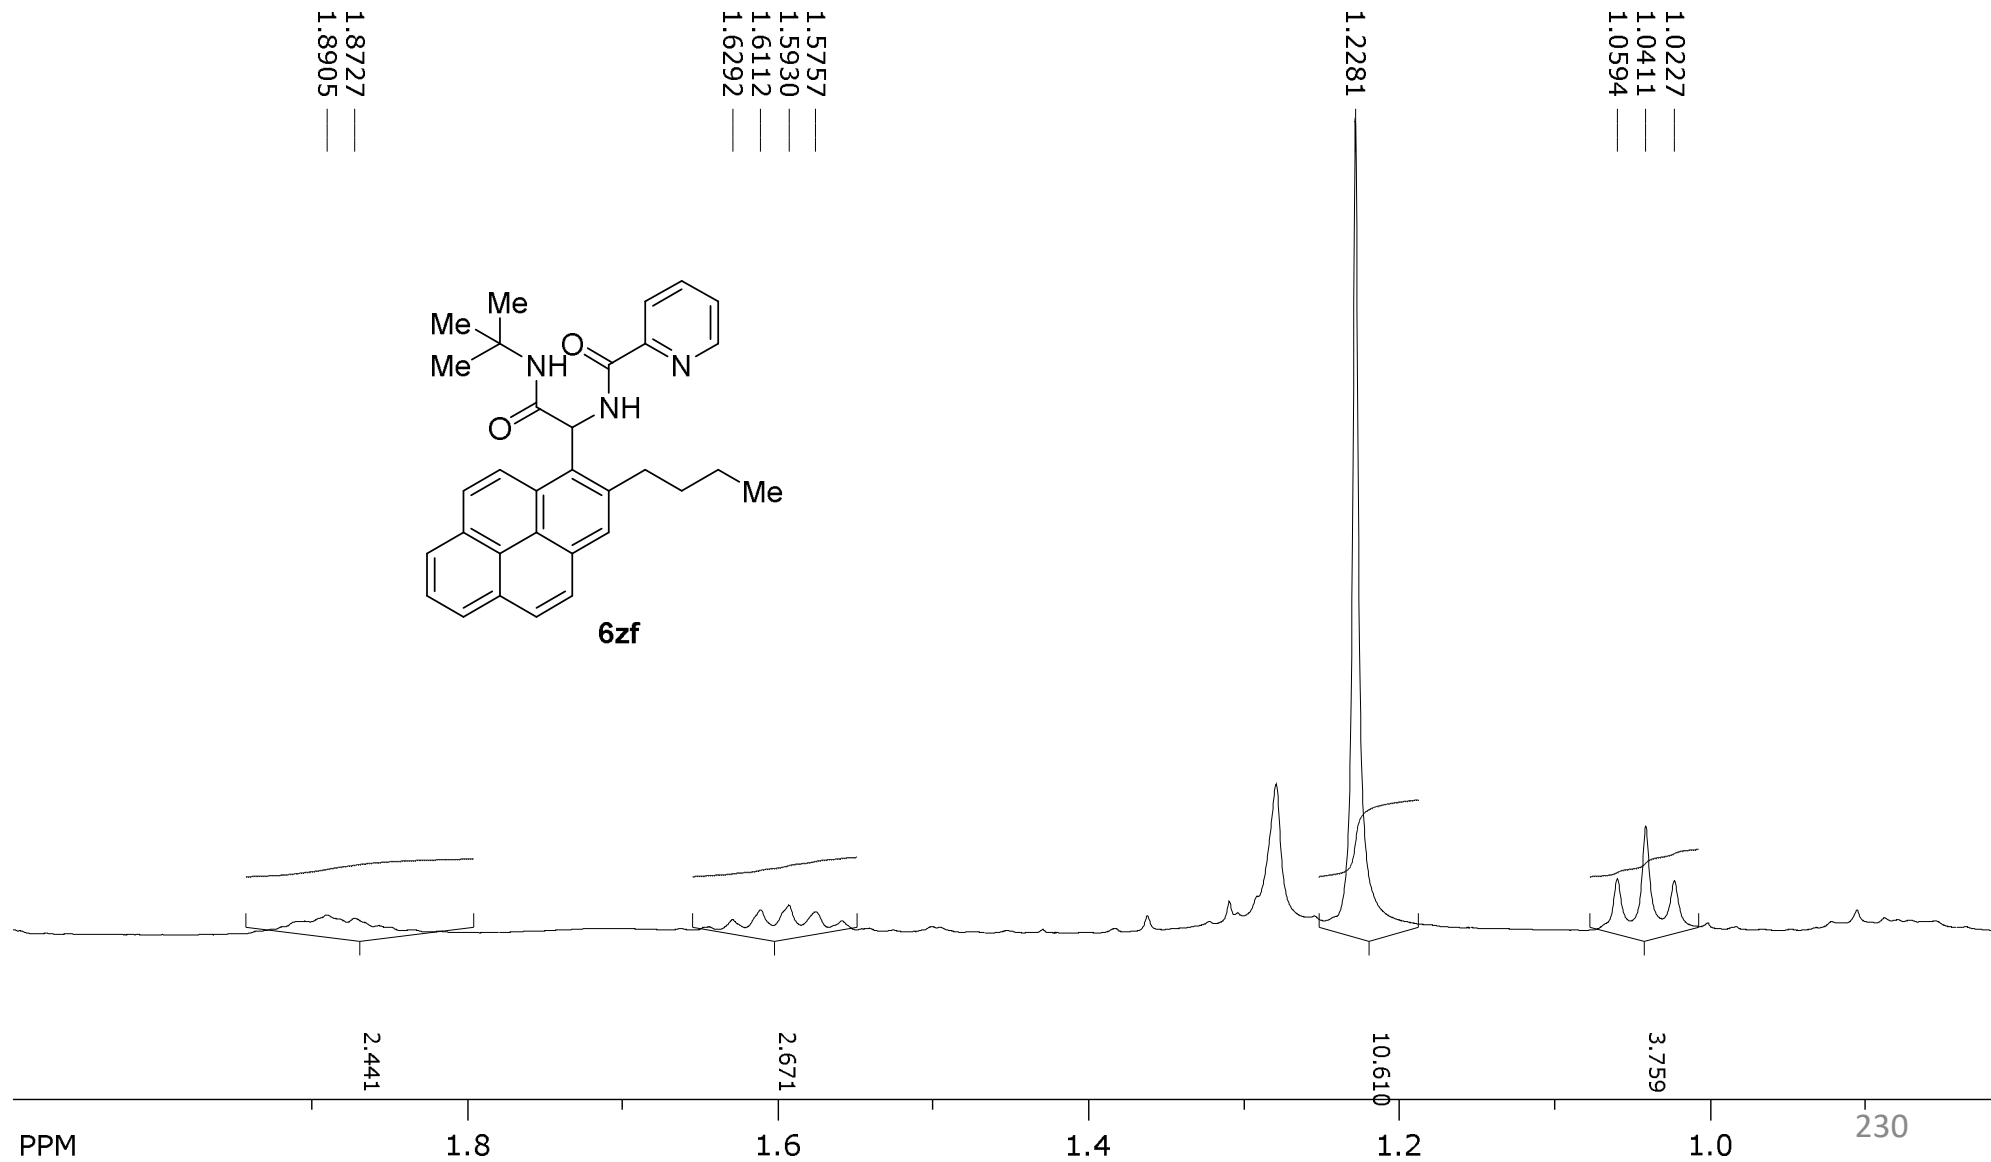

SpinWorks 4: AD-1942A  
C13CPD256 CDCl3 /opt/topspin3.5pl2/nmrdata nmrsu 32

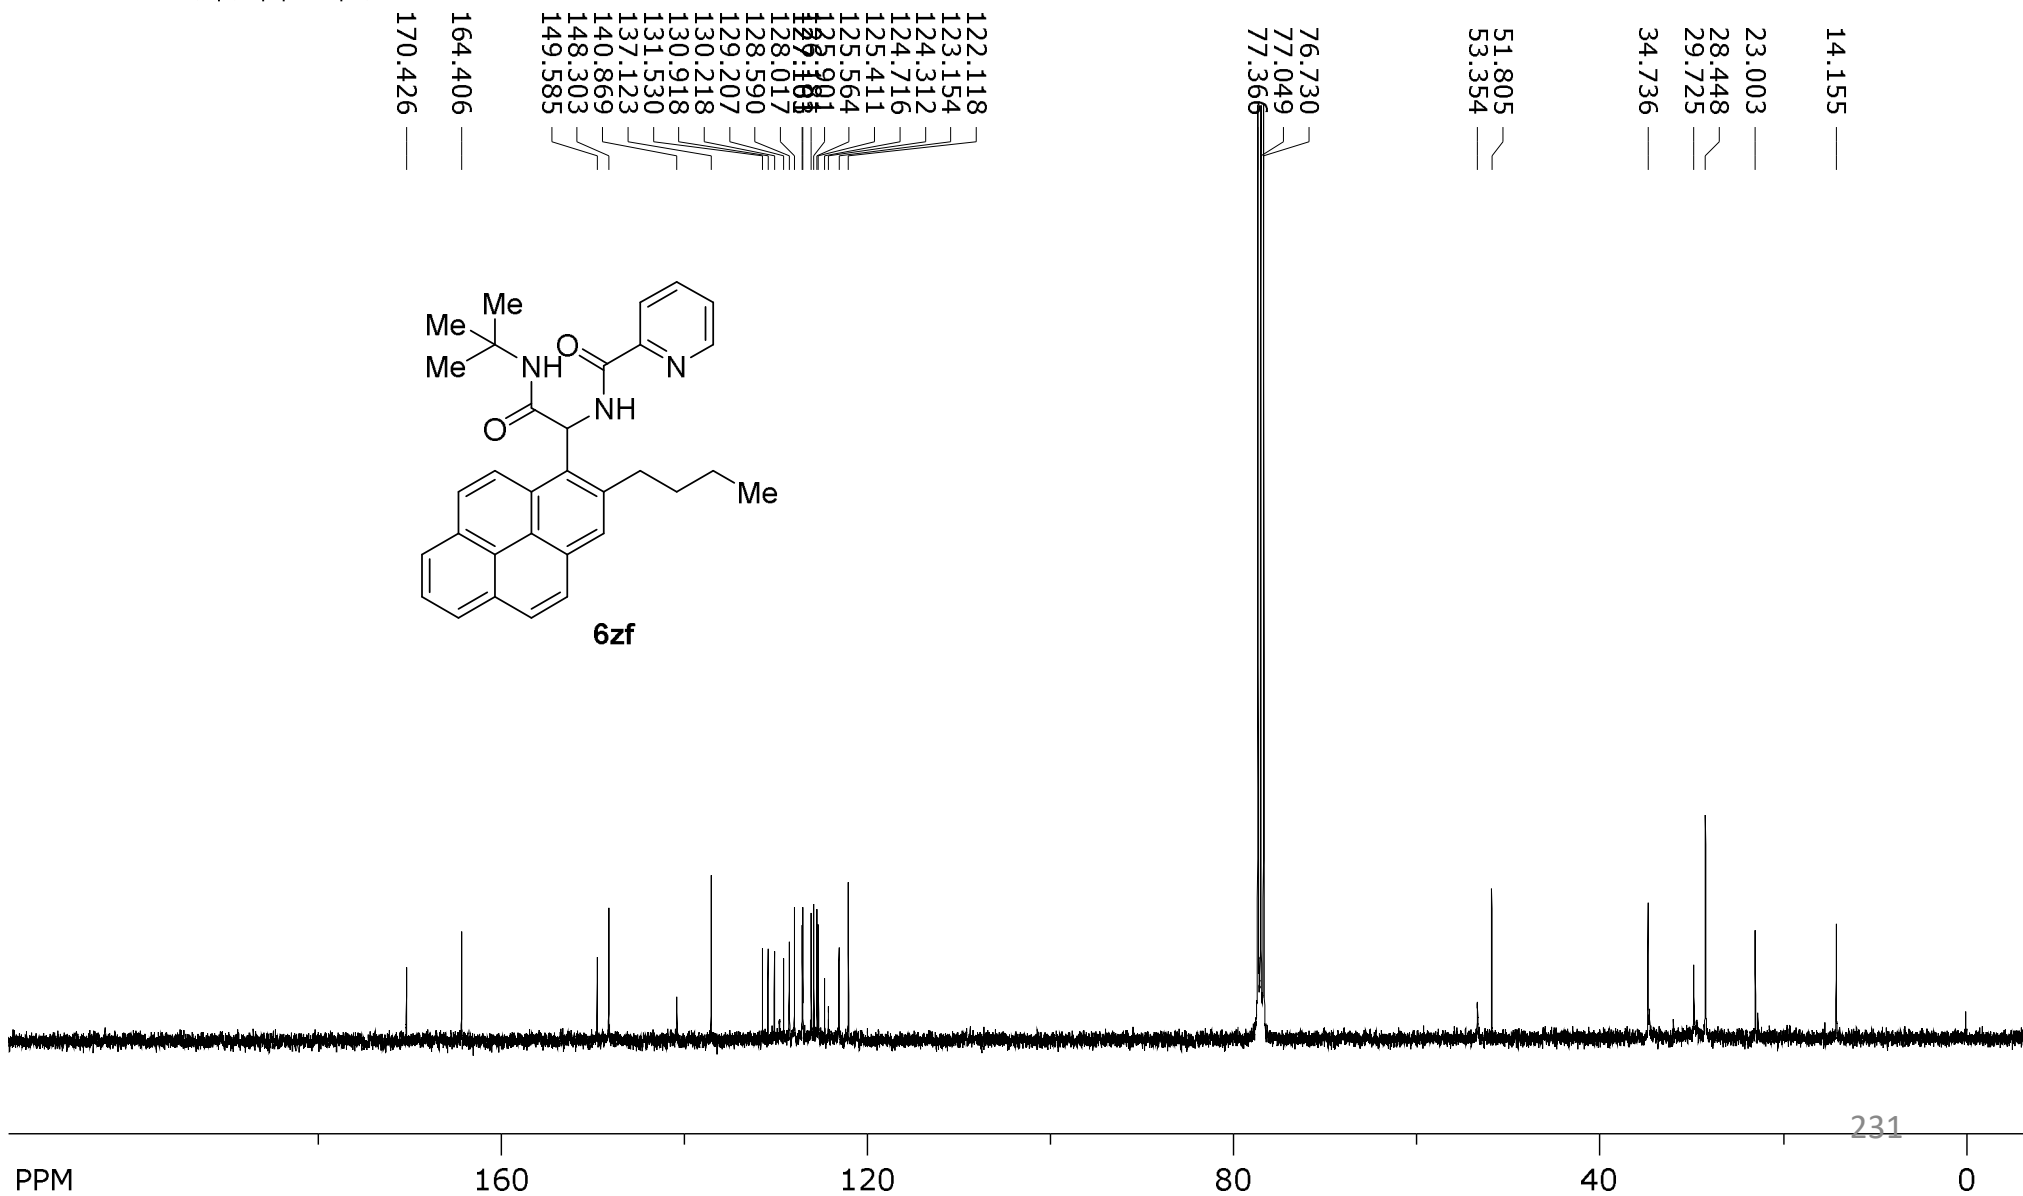

SpinWorks 4: AD-1942A  
C13CPD256 CDCl3 /opt/topspin3.5pl2/nmrdata nmrsu 32

149.585 —  
148.303 —  
140.869 —  
137.123 —  
131.530 —  
130.918 —  
130.218 —  
129.207 —  
128.590 —  
128.017 —  
127.161 —  
127.103 —  
126.181 —  
125.901 —  
125.564 —  
125.411 —  
124.716 —  
124.312 —  
123.154 —  
122.118 —

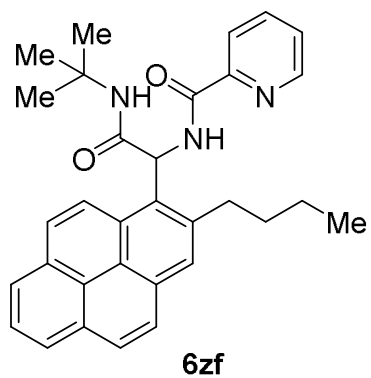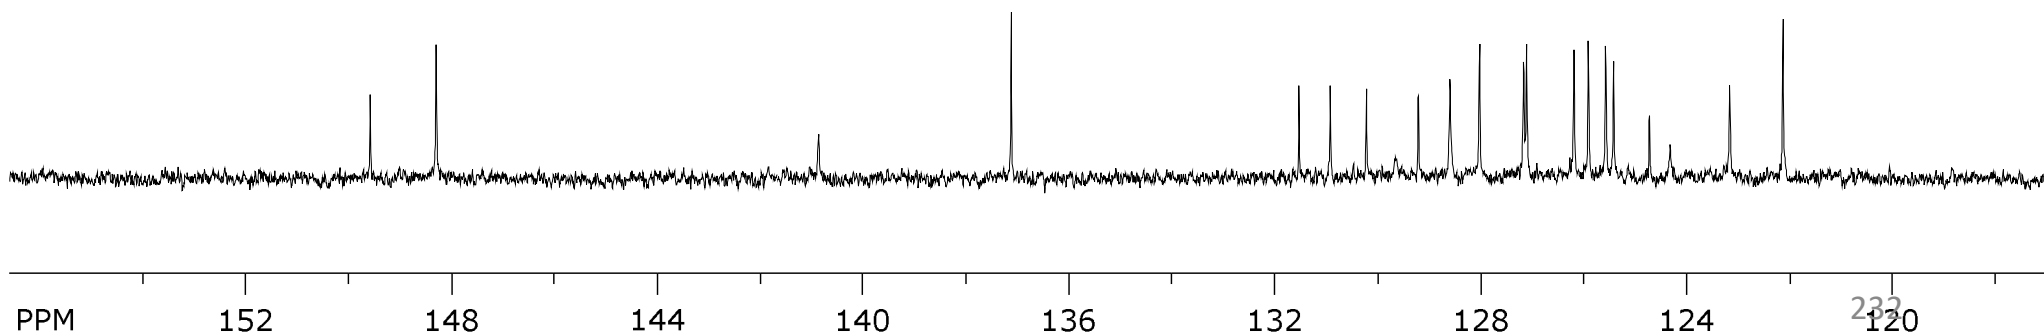



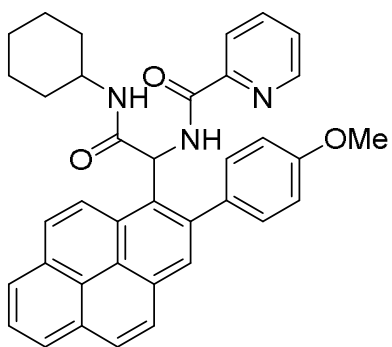

6zg

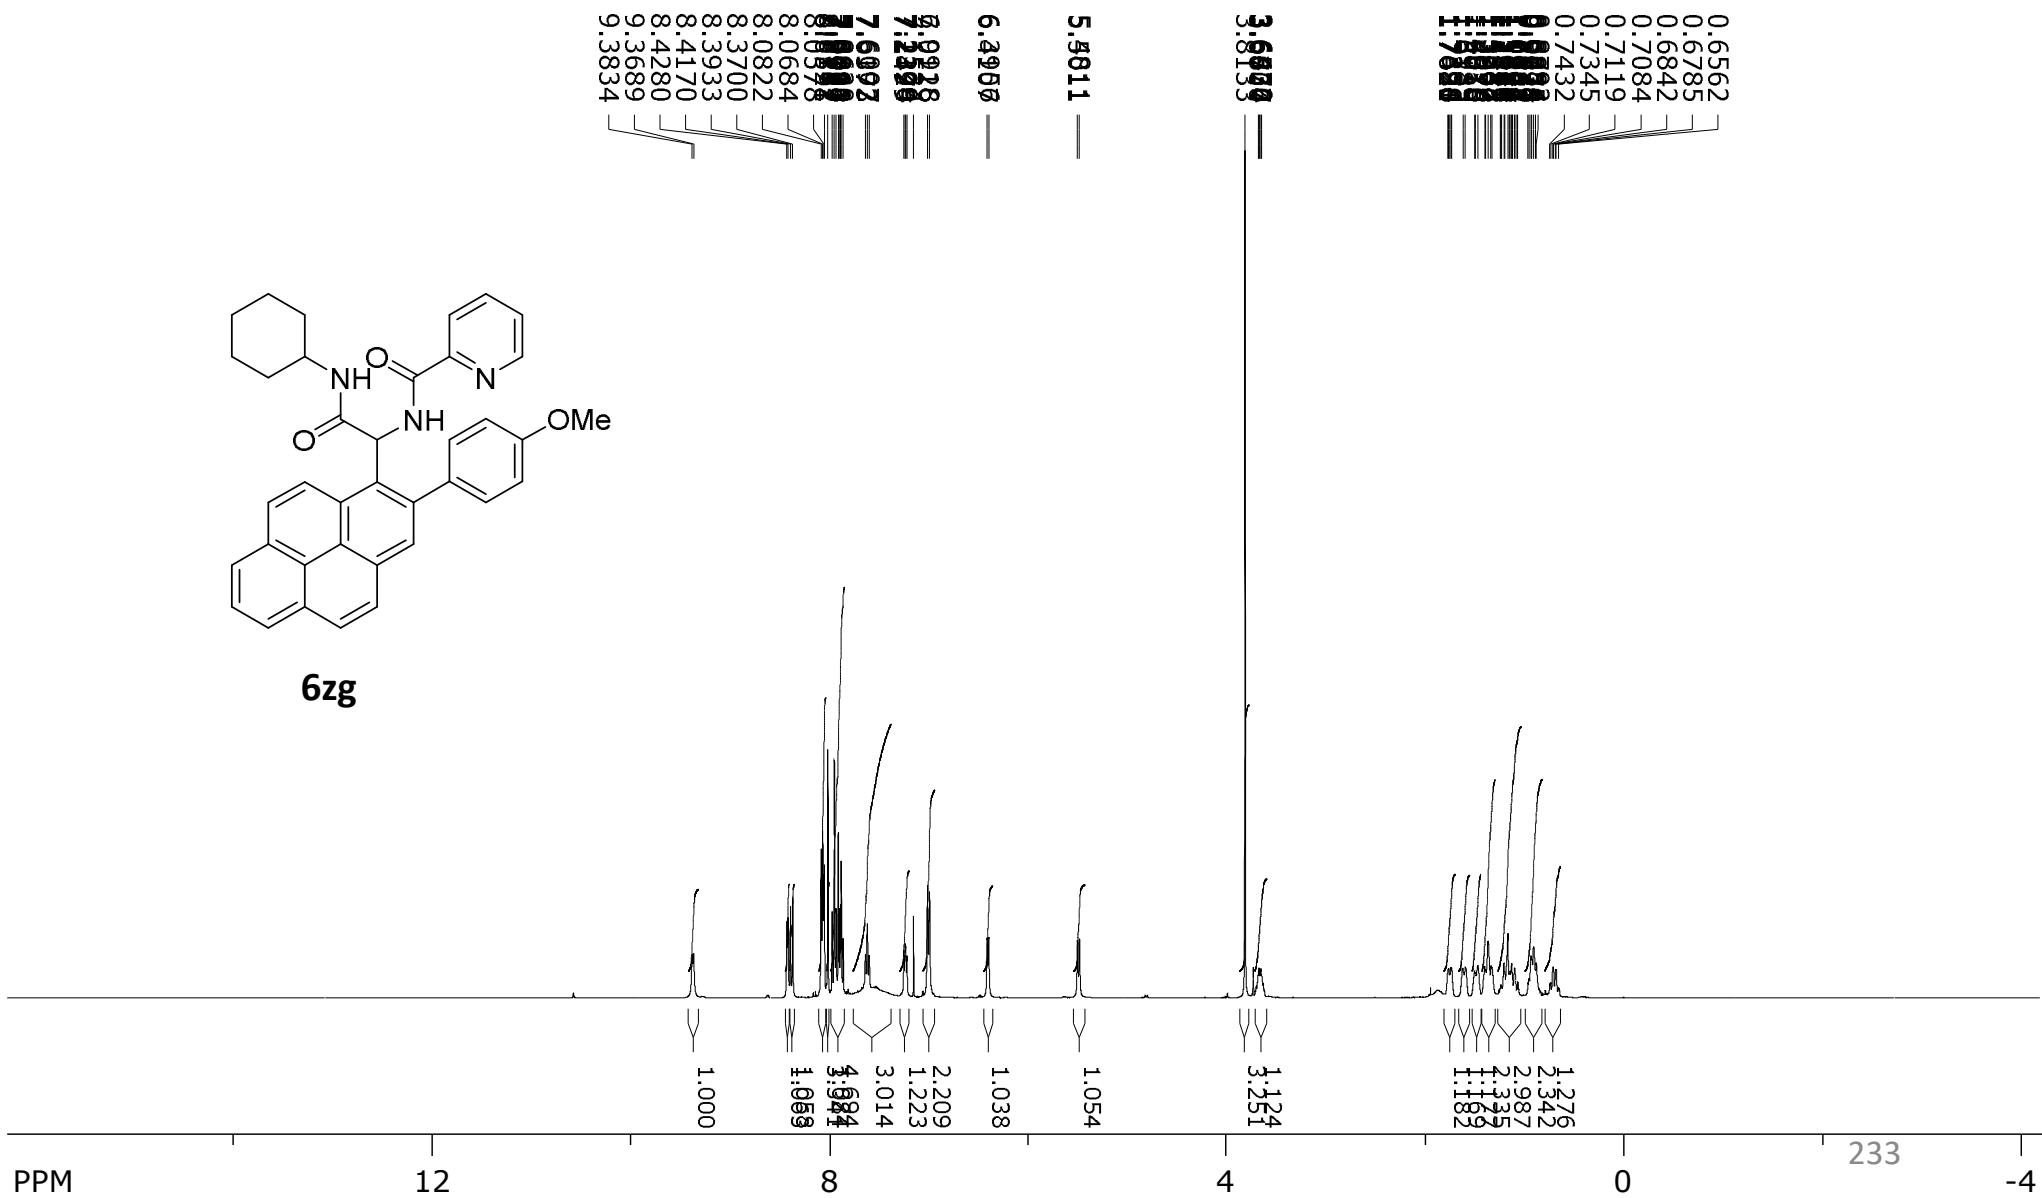

9.3689  
9.3834

8.3700  
8.3933  
8.4170  
8.4280

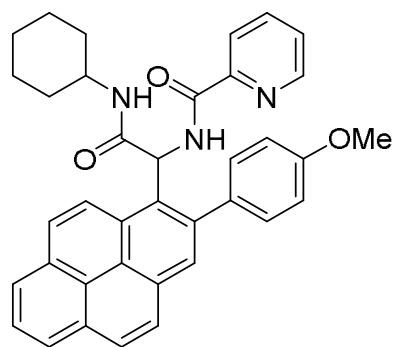

**6zg**

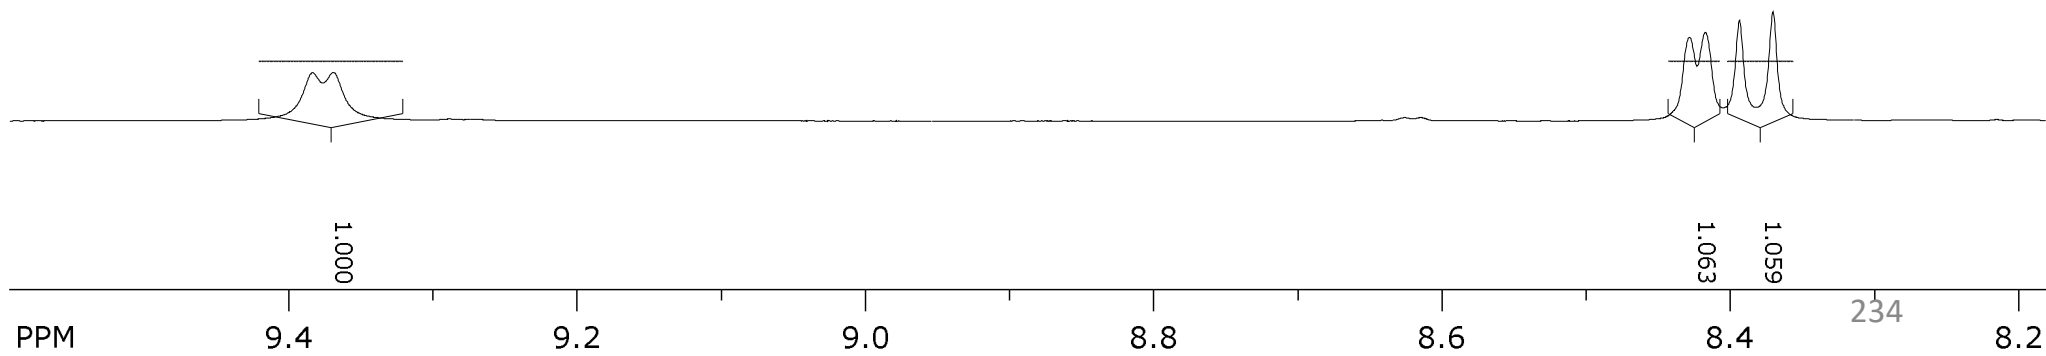

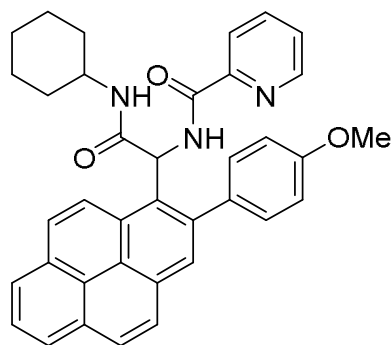

**6zg**

8.0822 —  
8.0684 —  
8.0578 —  
8.0521 —  
8.0162 —  
7.9729 —  
7.9507 —  
7.9323 —  
7.9116 —  
7.9001 —  
7.8893 —  
7.8811 —  
7.8620 —

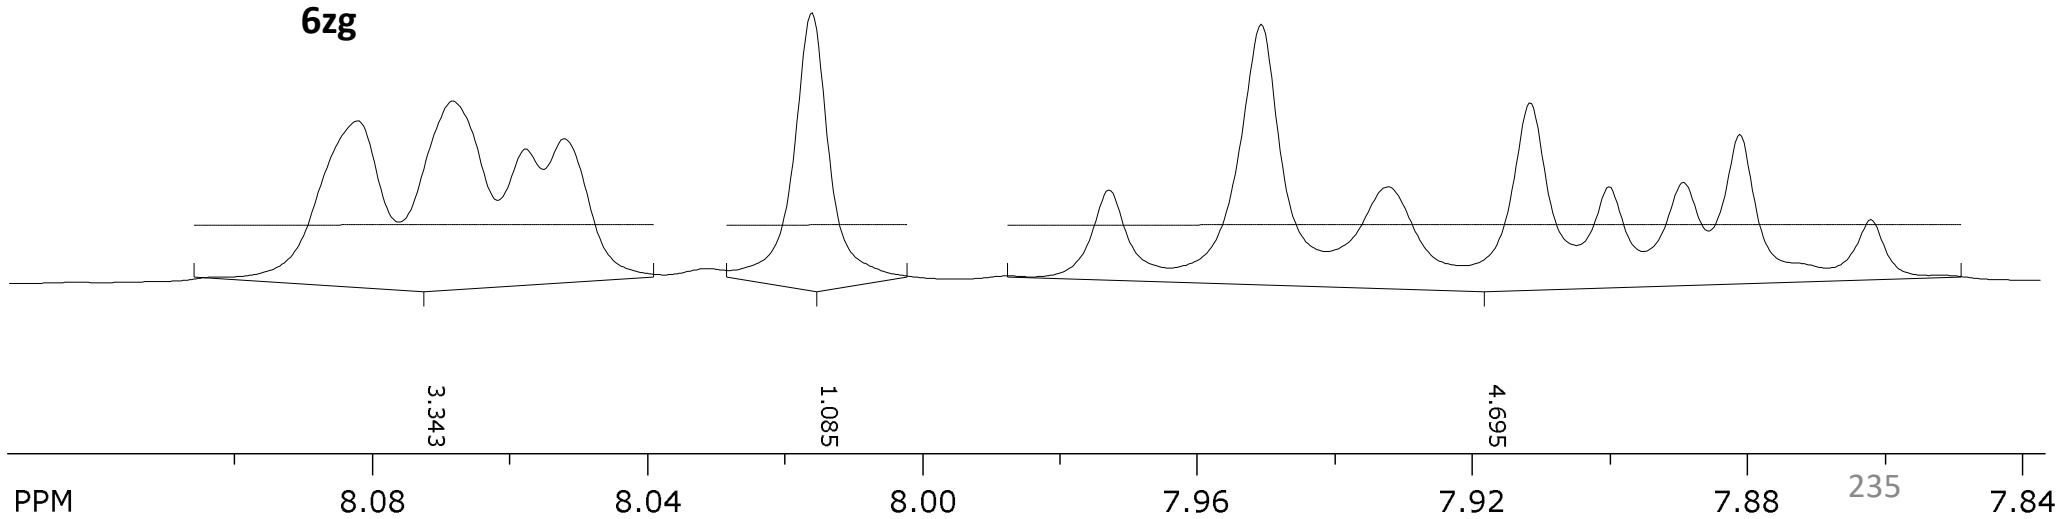

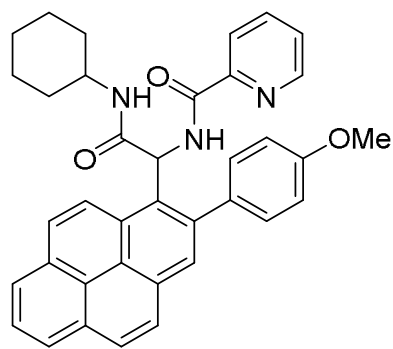

**6zg**

7.6007  
7.6192  
7.6373

7.2199  
7.2324  
7.2376  
7.2499

7.1524

6.9918  
7.0126

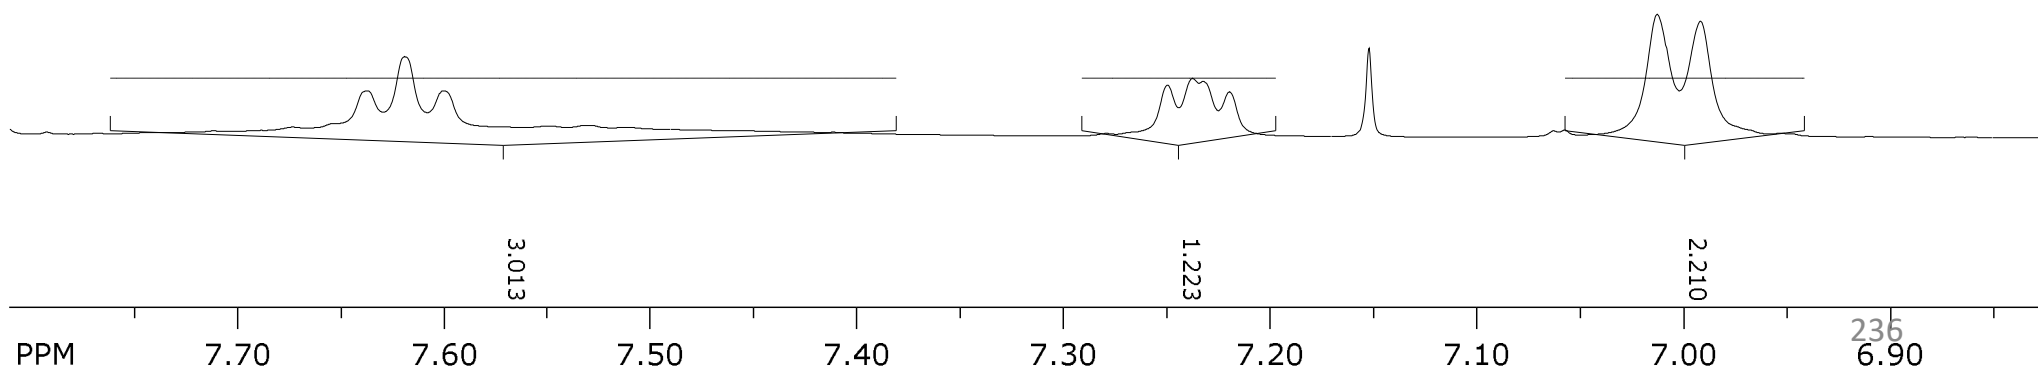

6.3956  
6.4107

5.4811  
5.5011

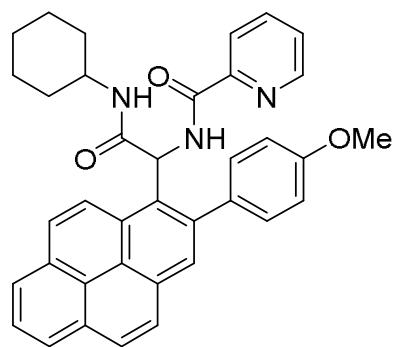

**6zg**

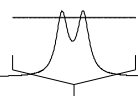

1.038

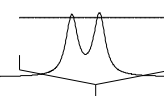

1.054

PPM

6.4

6.2

6.0

5.8

5.6

5.4

237

5.2

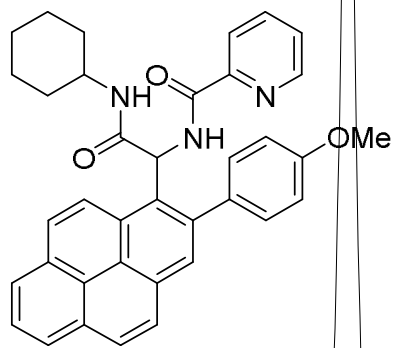

**6zg**

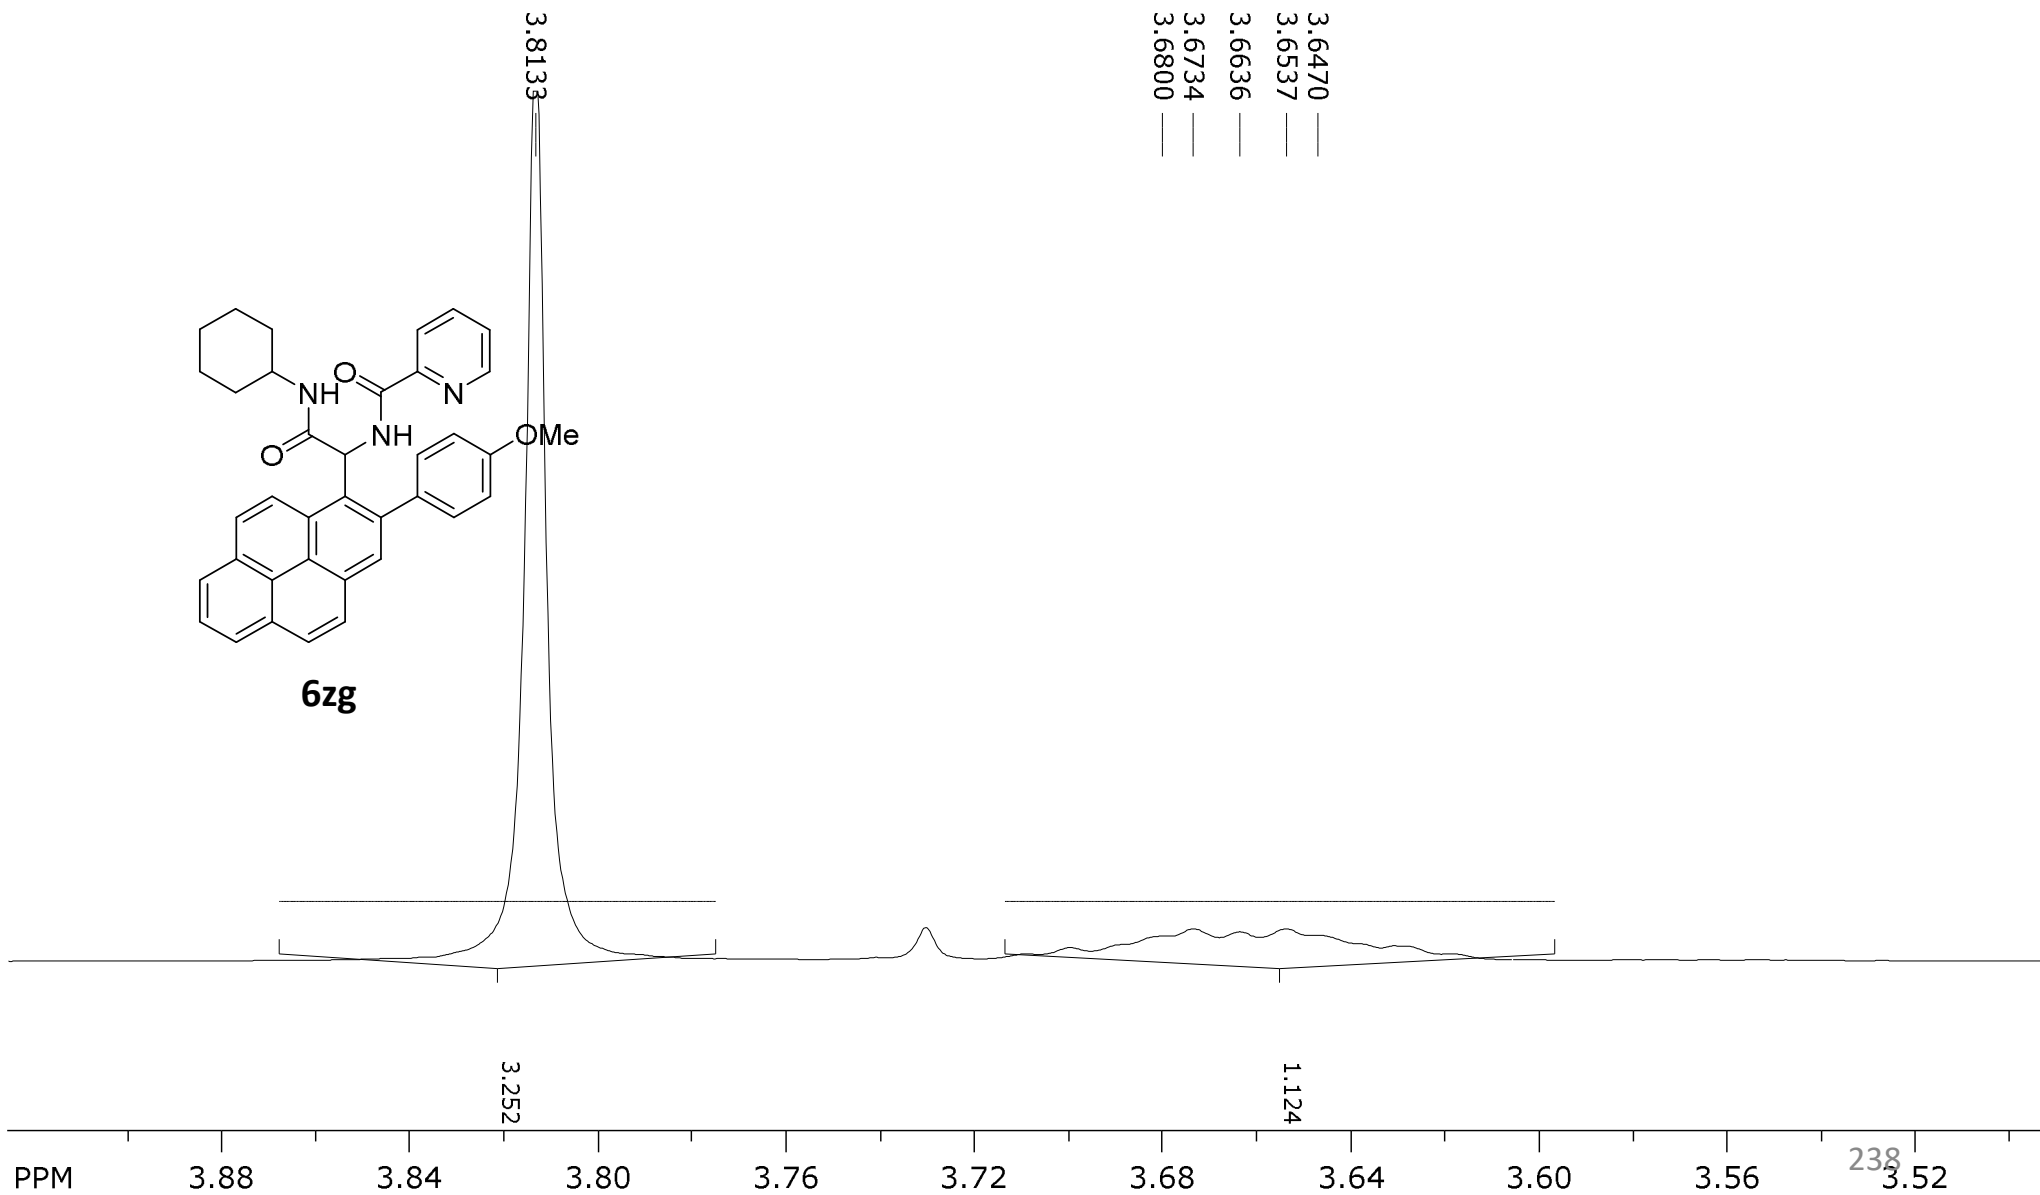

1.7324  
1.7390  
1.7498  
1.7625  
1.7681

1.5939  
1.6185

1.4676  
1.4910  
1.5010

1.3258  
1.3352  
1.3657  
1.3896  
1.3992

1.2429  
1.2267  
1.2058  
1.1975

1.1649  
1.1520  
1.1434  
1.1335  
1.1272  
1.1191  
1.0977  
1.0942  
1.0732  
1.0644

0.9625  
0.9528  
0.9321  
0.9238  
0.9075  
0.8884  
0.8792

0.7432  
0.7345  
0.7119  
0.7084  
0.6842  
0.6785  
0.6562

**6zg**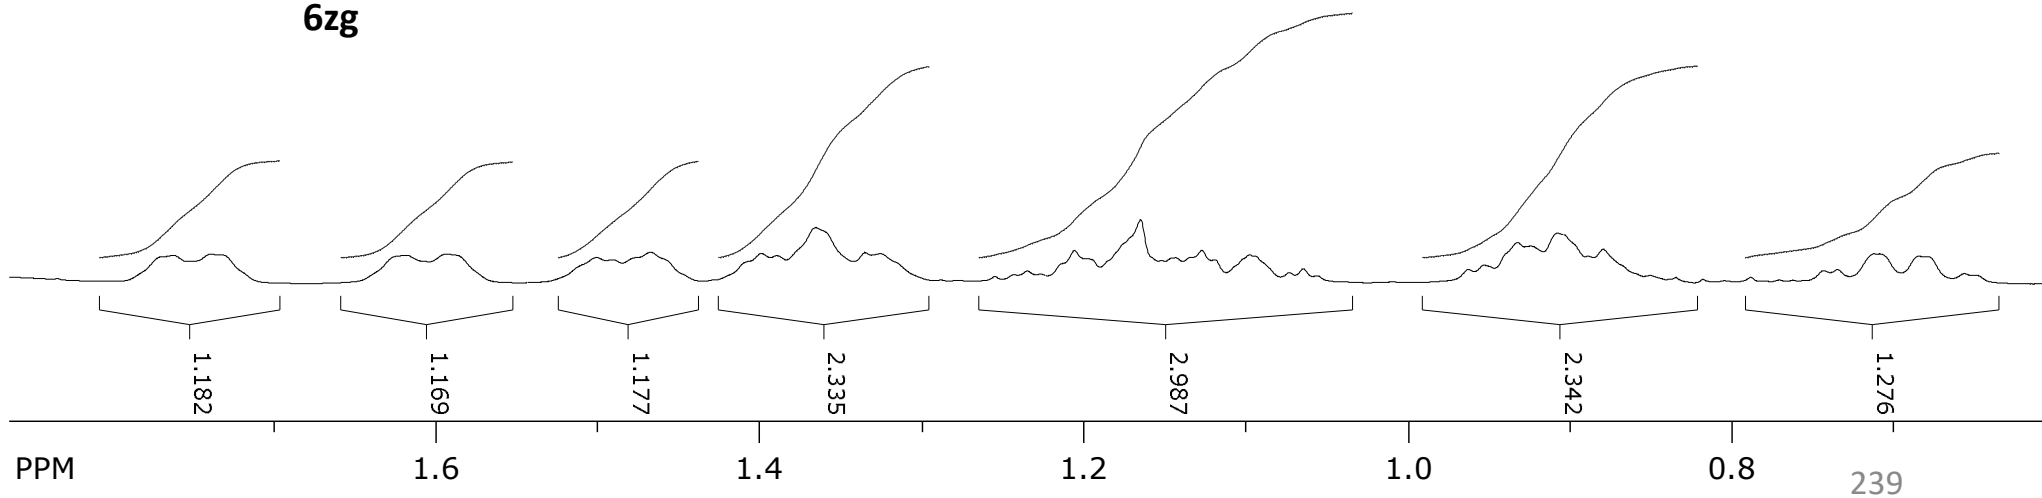

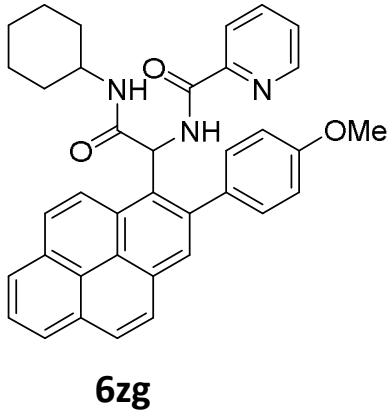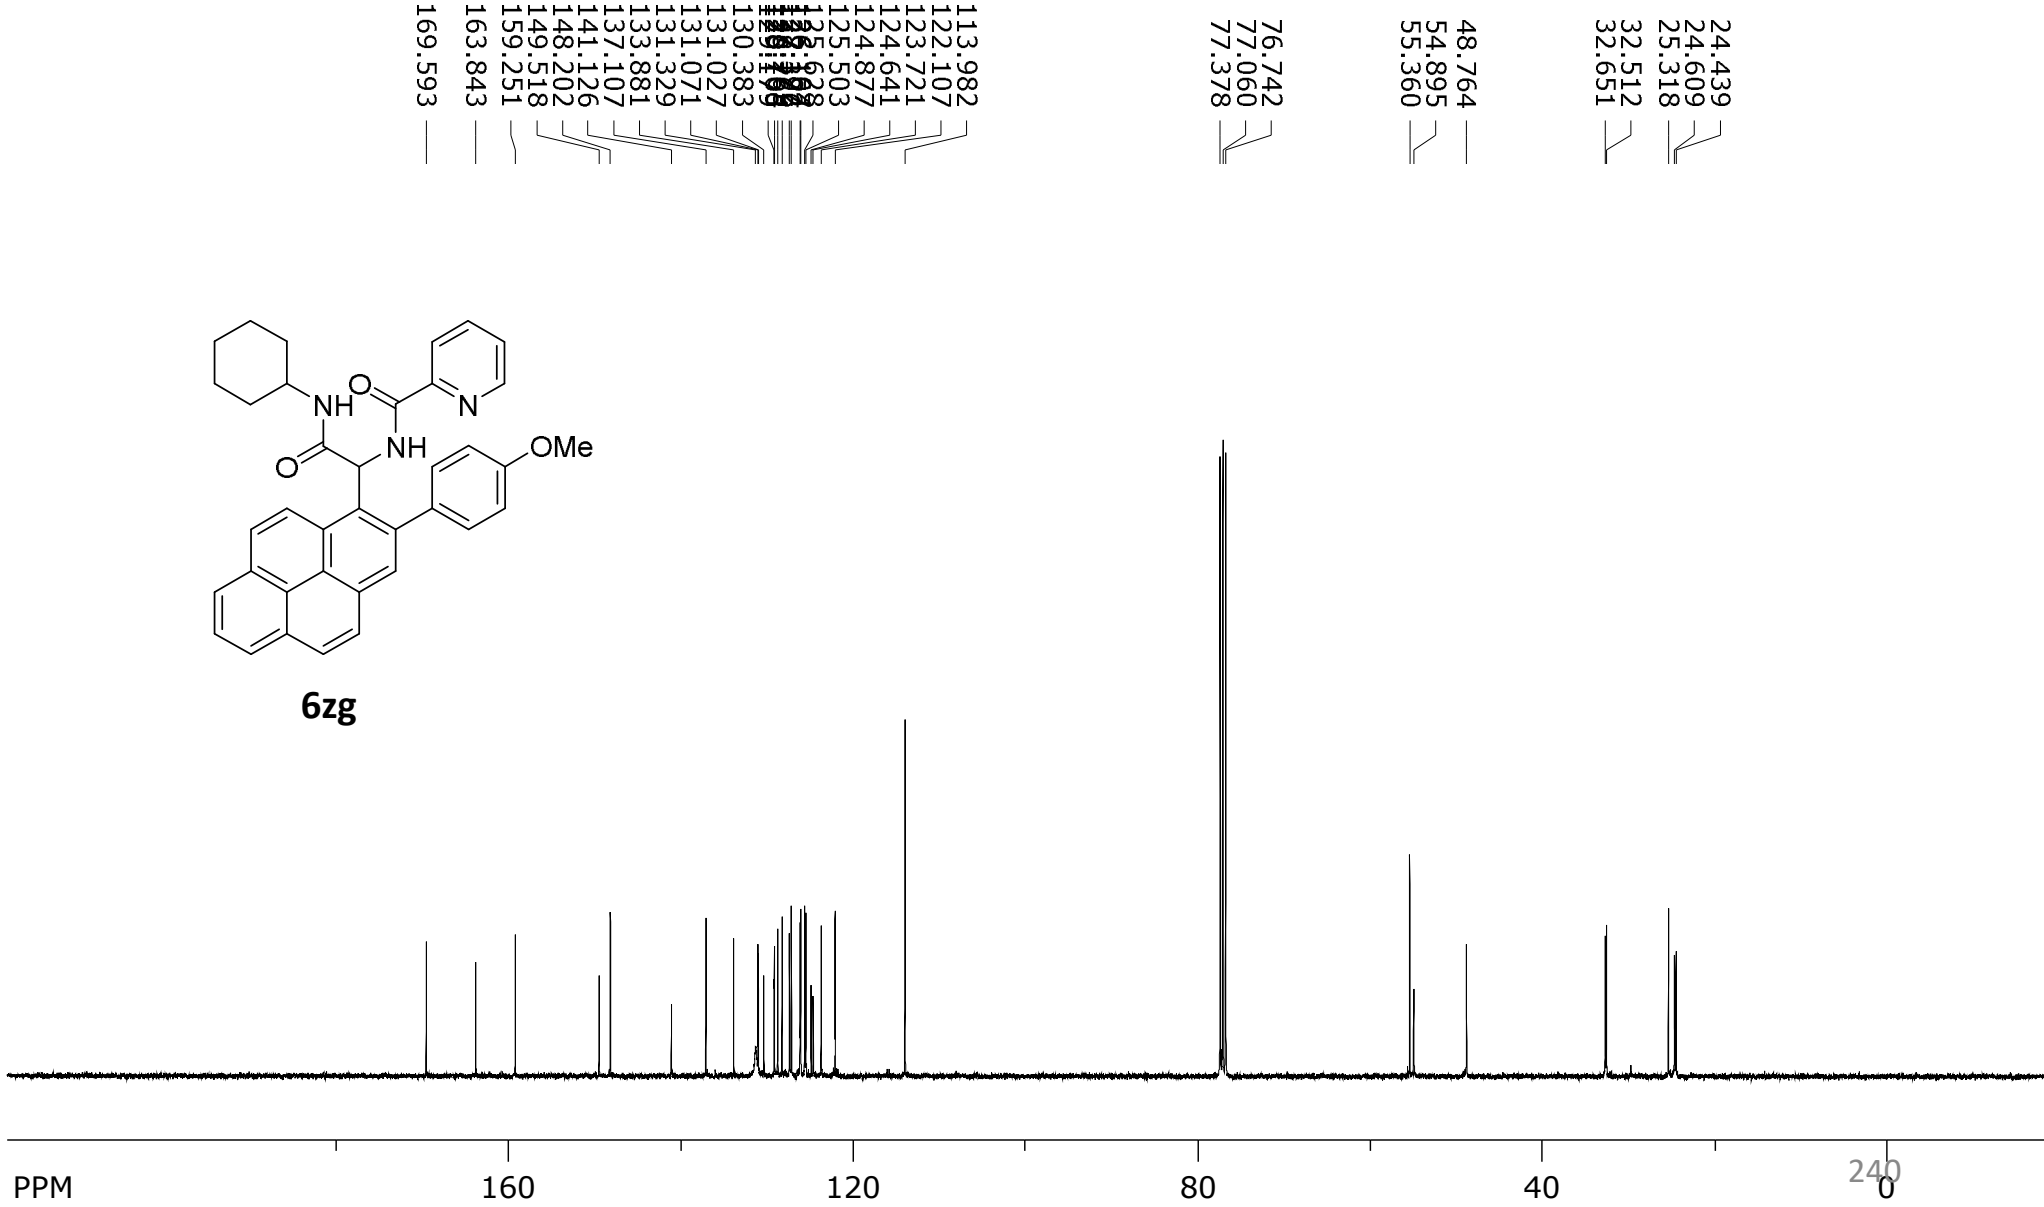



SpinWorks 4: AD-2258

169.593

163.843

159.251

149.518

148.202

141.126

137.107

133.881

131.329

131.071

130.383

129.179

129.165

128.764

128.265

127.396

127.172

126.167

126.104

125.628

125.503

124.877

124.641

123.721

113.982

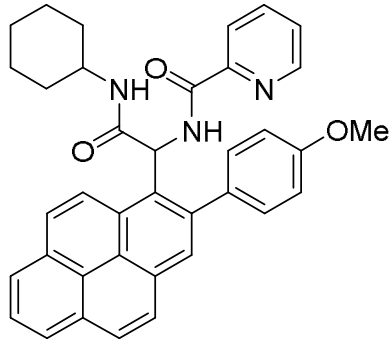

6zg

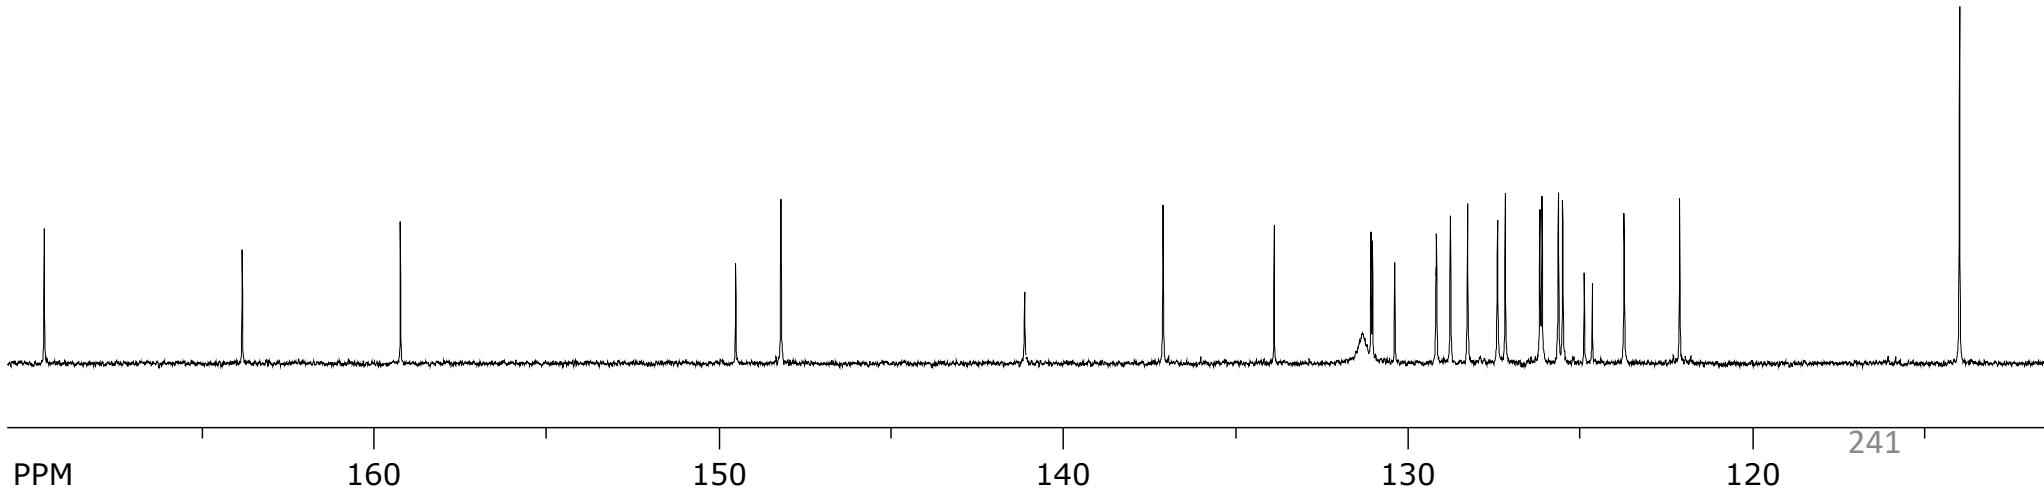

SpinWorks 4: AD-2258

54.895  
55.360

48.764

32.512  
32.651

24.439  
24.609  
25.318

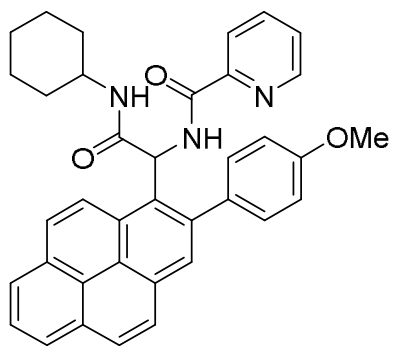

**6zg**

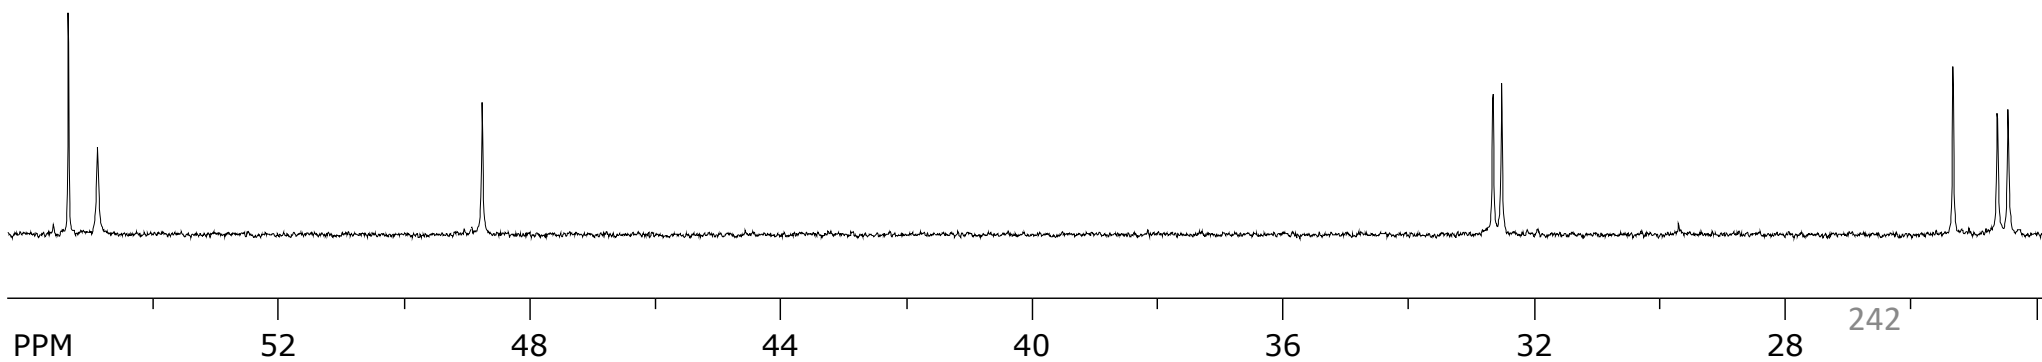

SpinWorks 4: AD-2265 Re  
PROTON CDCl3 /opt/topspin3.5pl2/nmrdata nmrsu 55

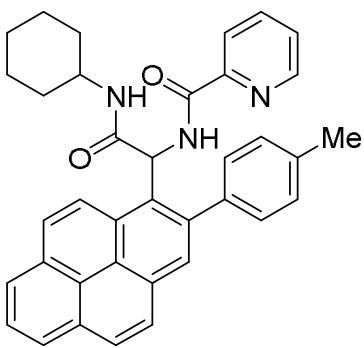

6zh

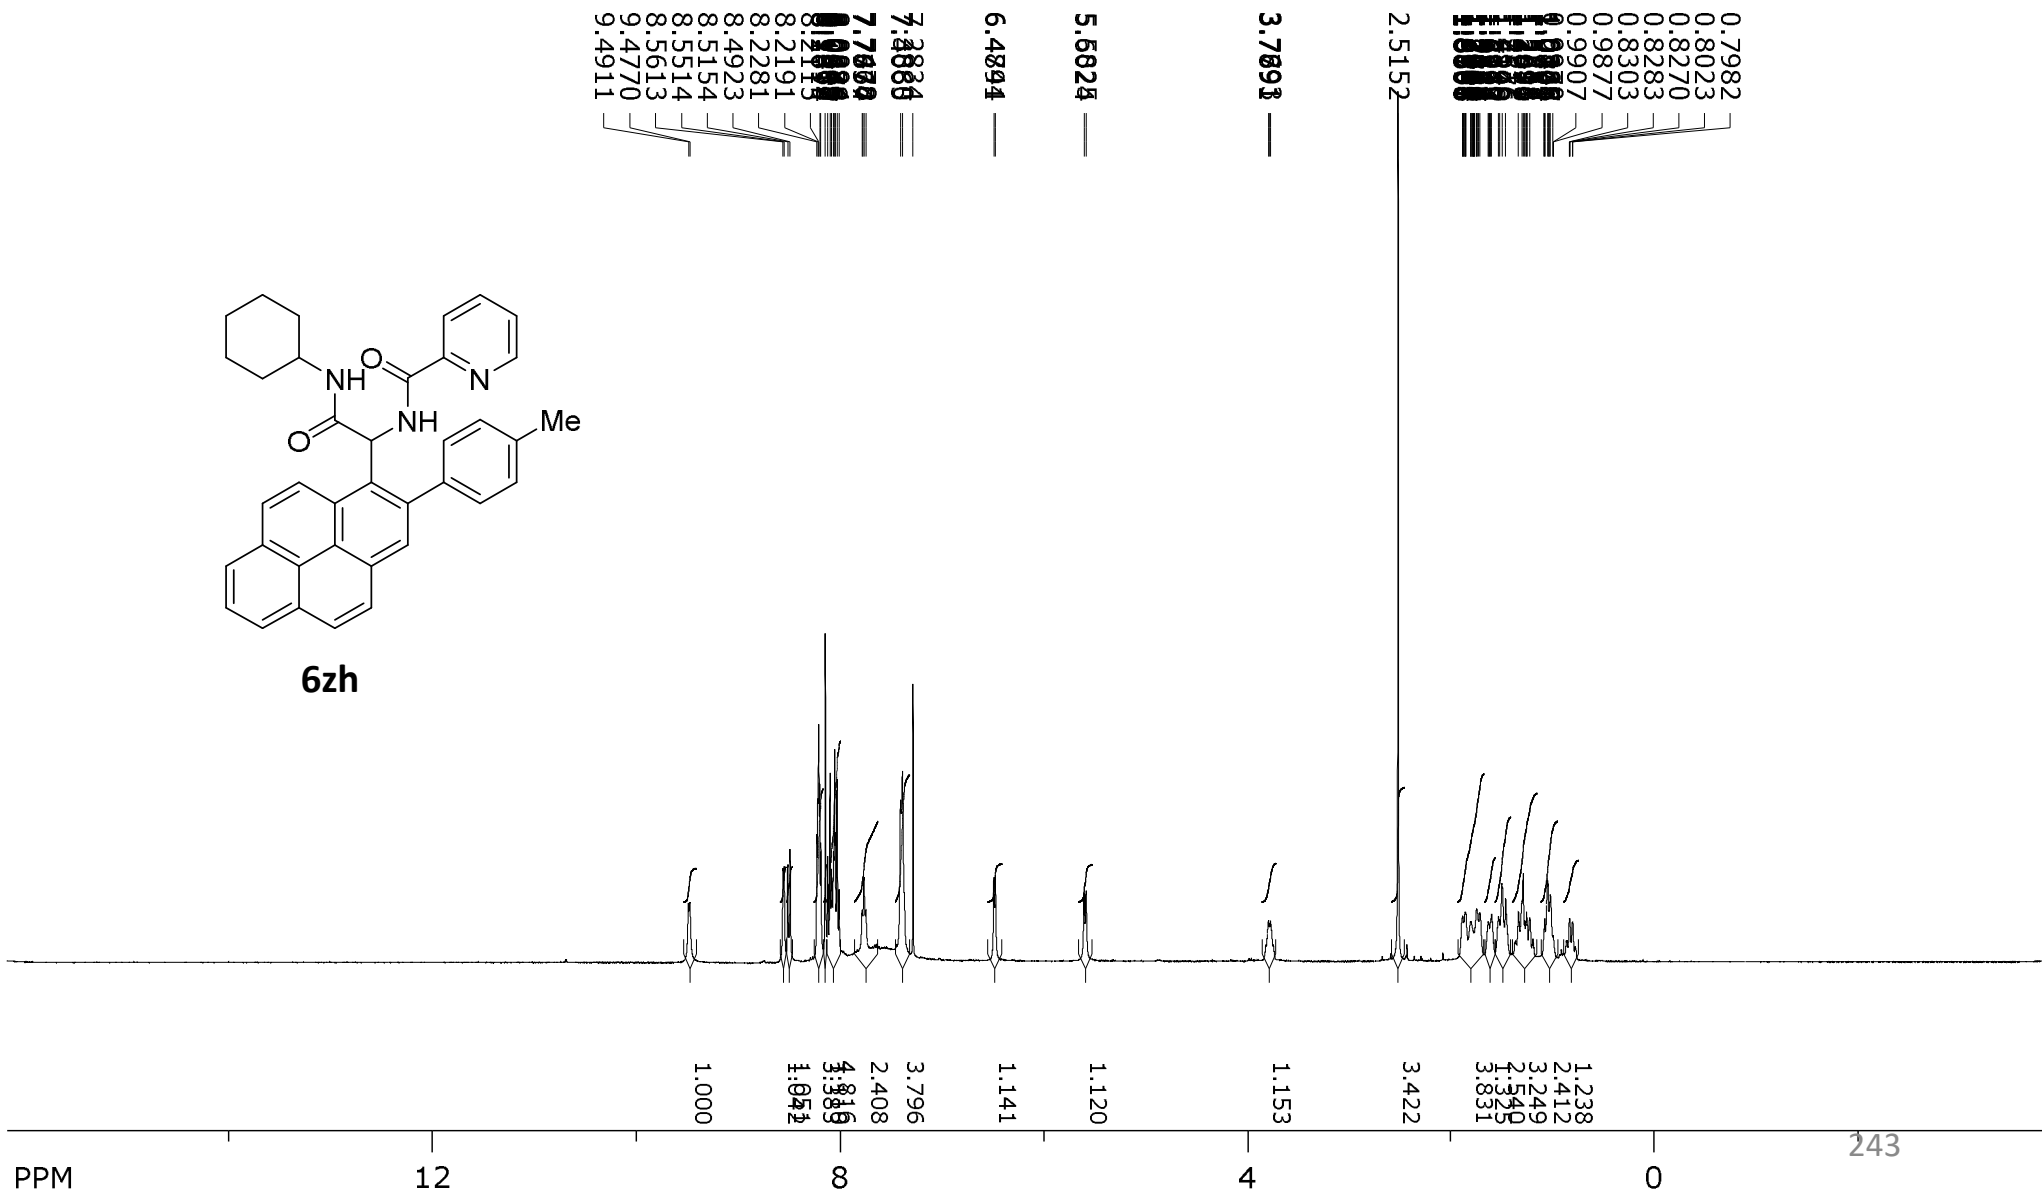

SpinWorks 4: AD-2265 Re  
PROTON CDCl3 /opt/topspin3.5pl2/nmrdata nmrsu 55

9.4770  
9.4911

8.4923  
8.5154  
8.5514  
8.5613

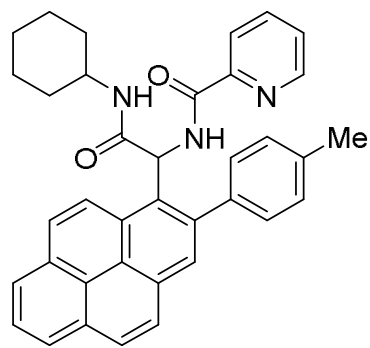

**6zh**

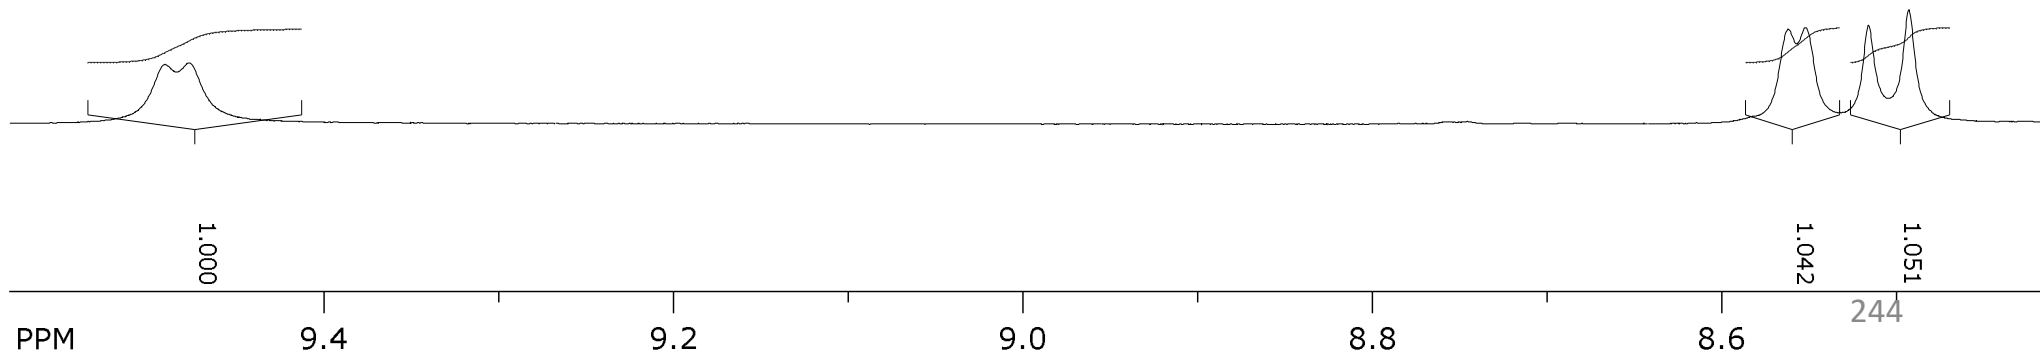

SpinWorks 4: AD-2265 Re  
PROTON CDCl3 /opt/topspin3.5pl2/nmrdata nmrsu 55

8.1899 —  
8.2014 —  
8.2115 —  
8.2191 —  
8.2281 —  
8.1460 —  
8.1217 —  
8.0995 —  
8.0845 —  
8.0649 —  
8.0546 —  
8.0476 —  
8.0288 —  
8.0094 —

7.7478 —  
7.7660 —  
7.7774 —  
7.7837 —



**6zh**

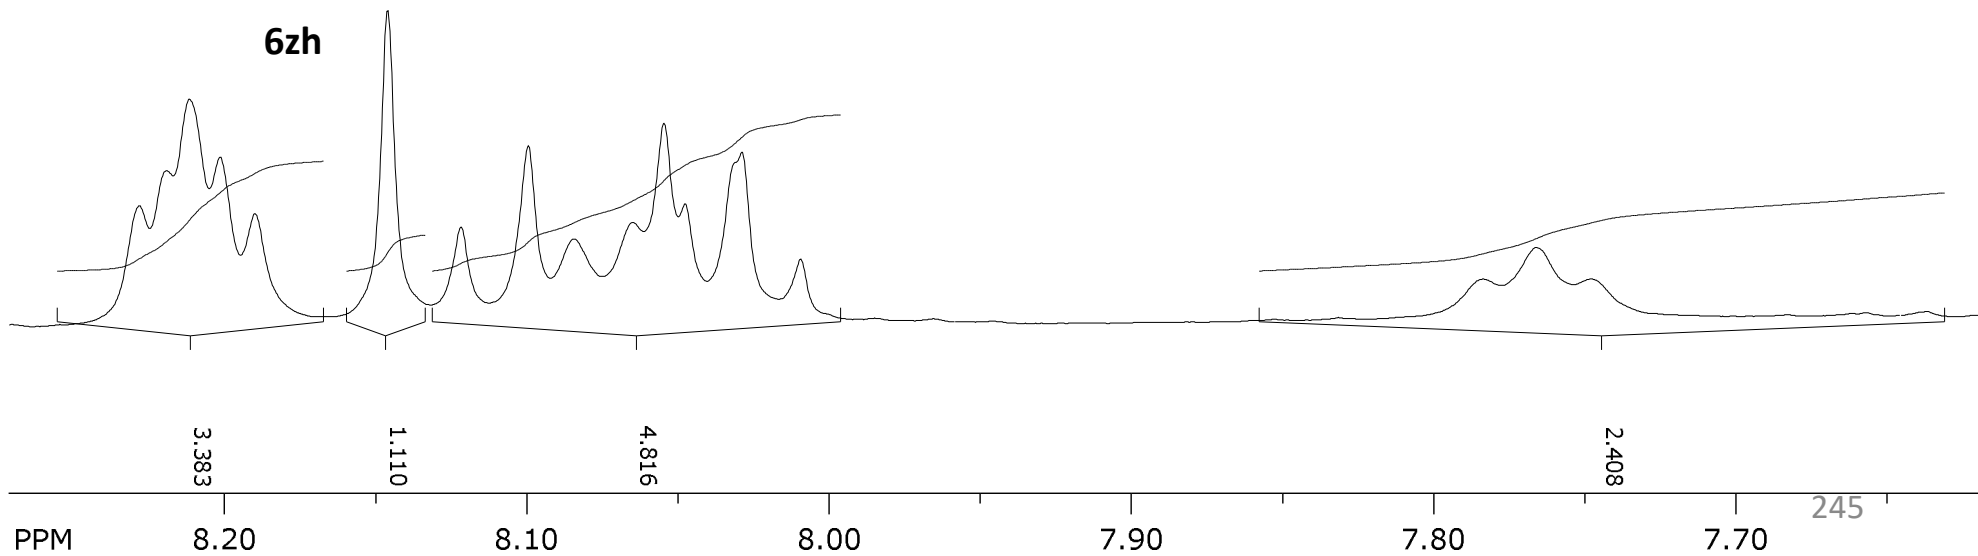

SpinWorks 4: AD-2265 Re  
PROTON CDCl3 /opt/topspin3.5pl2/nmrdata nmrsu 55

7.3880  
7.4065

7.2834

6.4744  
6.4891

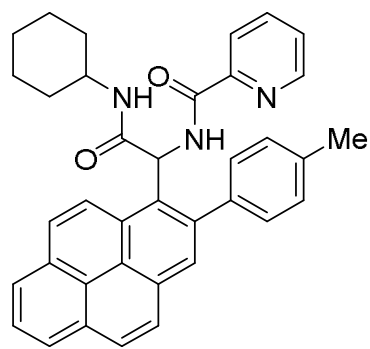

**6zh**

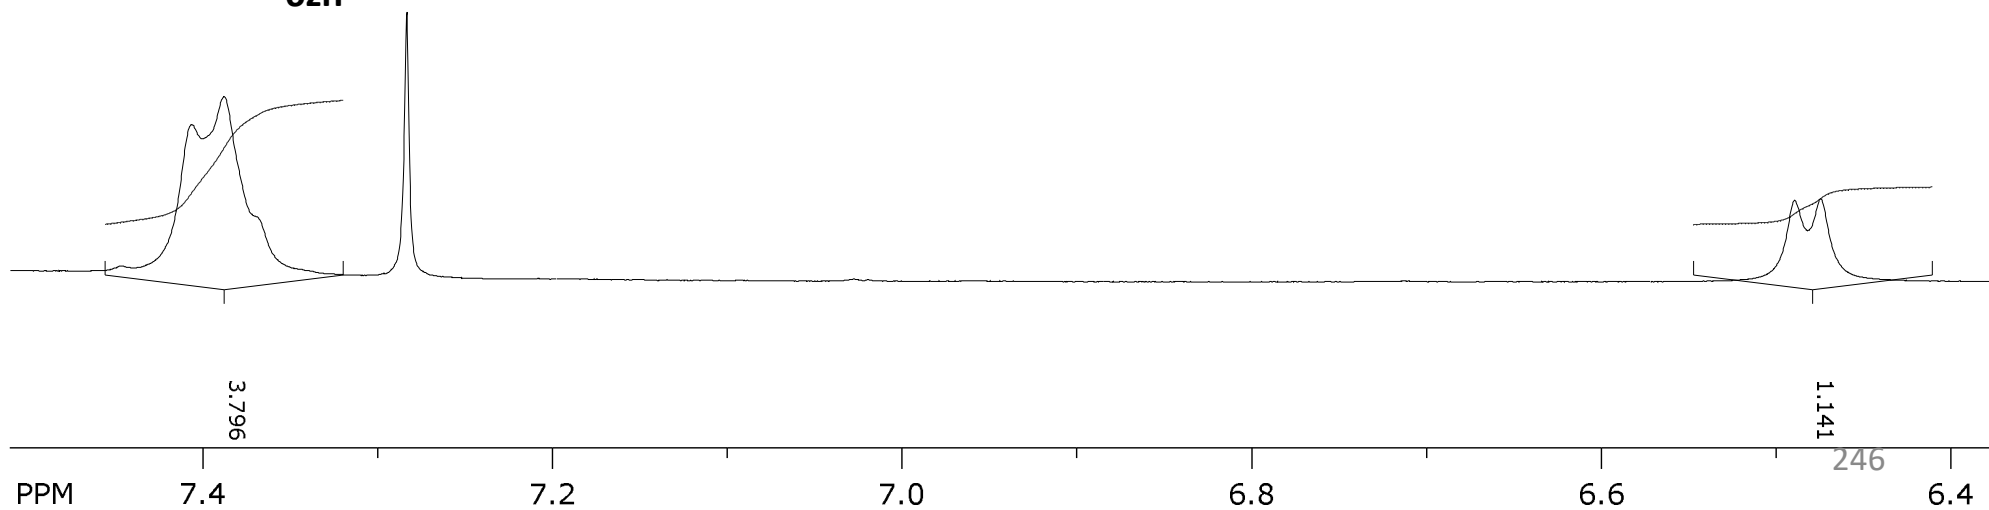

SpinWorks 4: AD-2265 Re  
PROTON CDCl3 /opt/topspin3.5pl2/nmrdata nmrsu 55

5.6024

5.5825



**6zh**

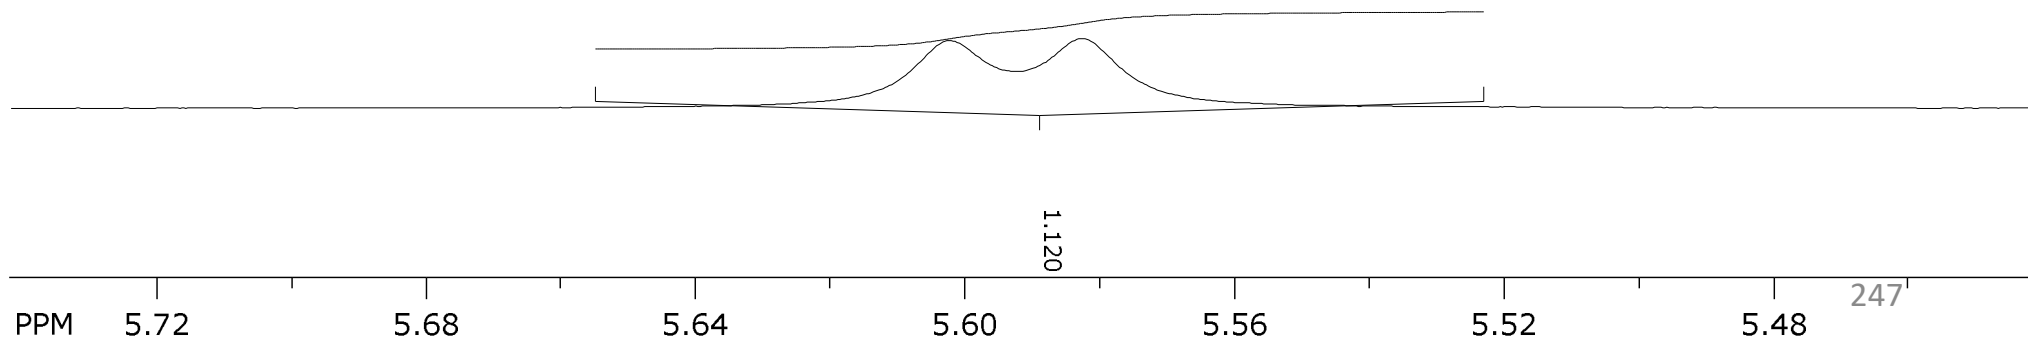

SpinWorks 4: AD-2265 Re  
PROTON CDCl3 /opt/topspin3.5pl2/nmrdata nmrsu 55

3.7693  
3.7791  
3.7891



**6zh**

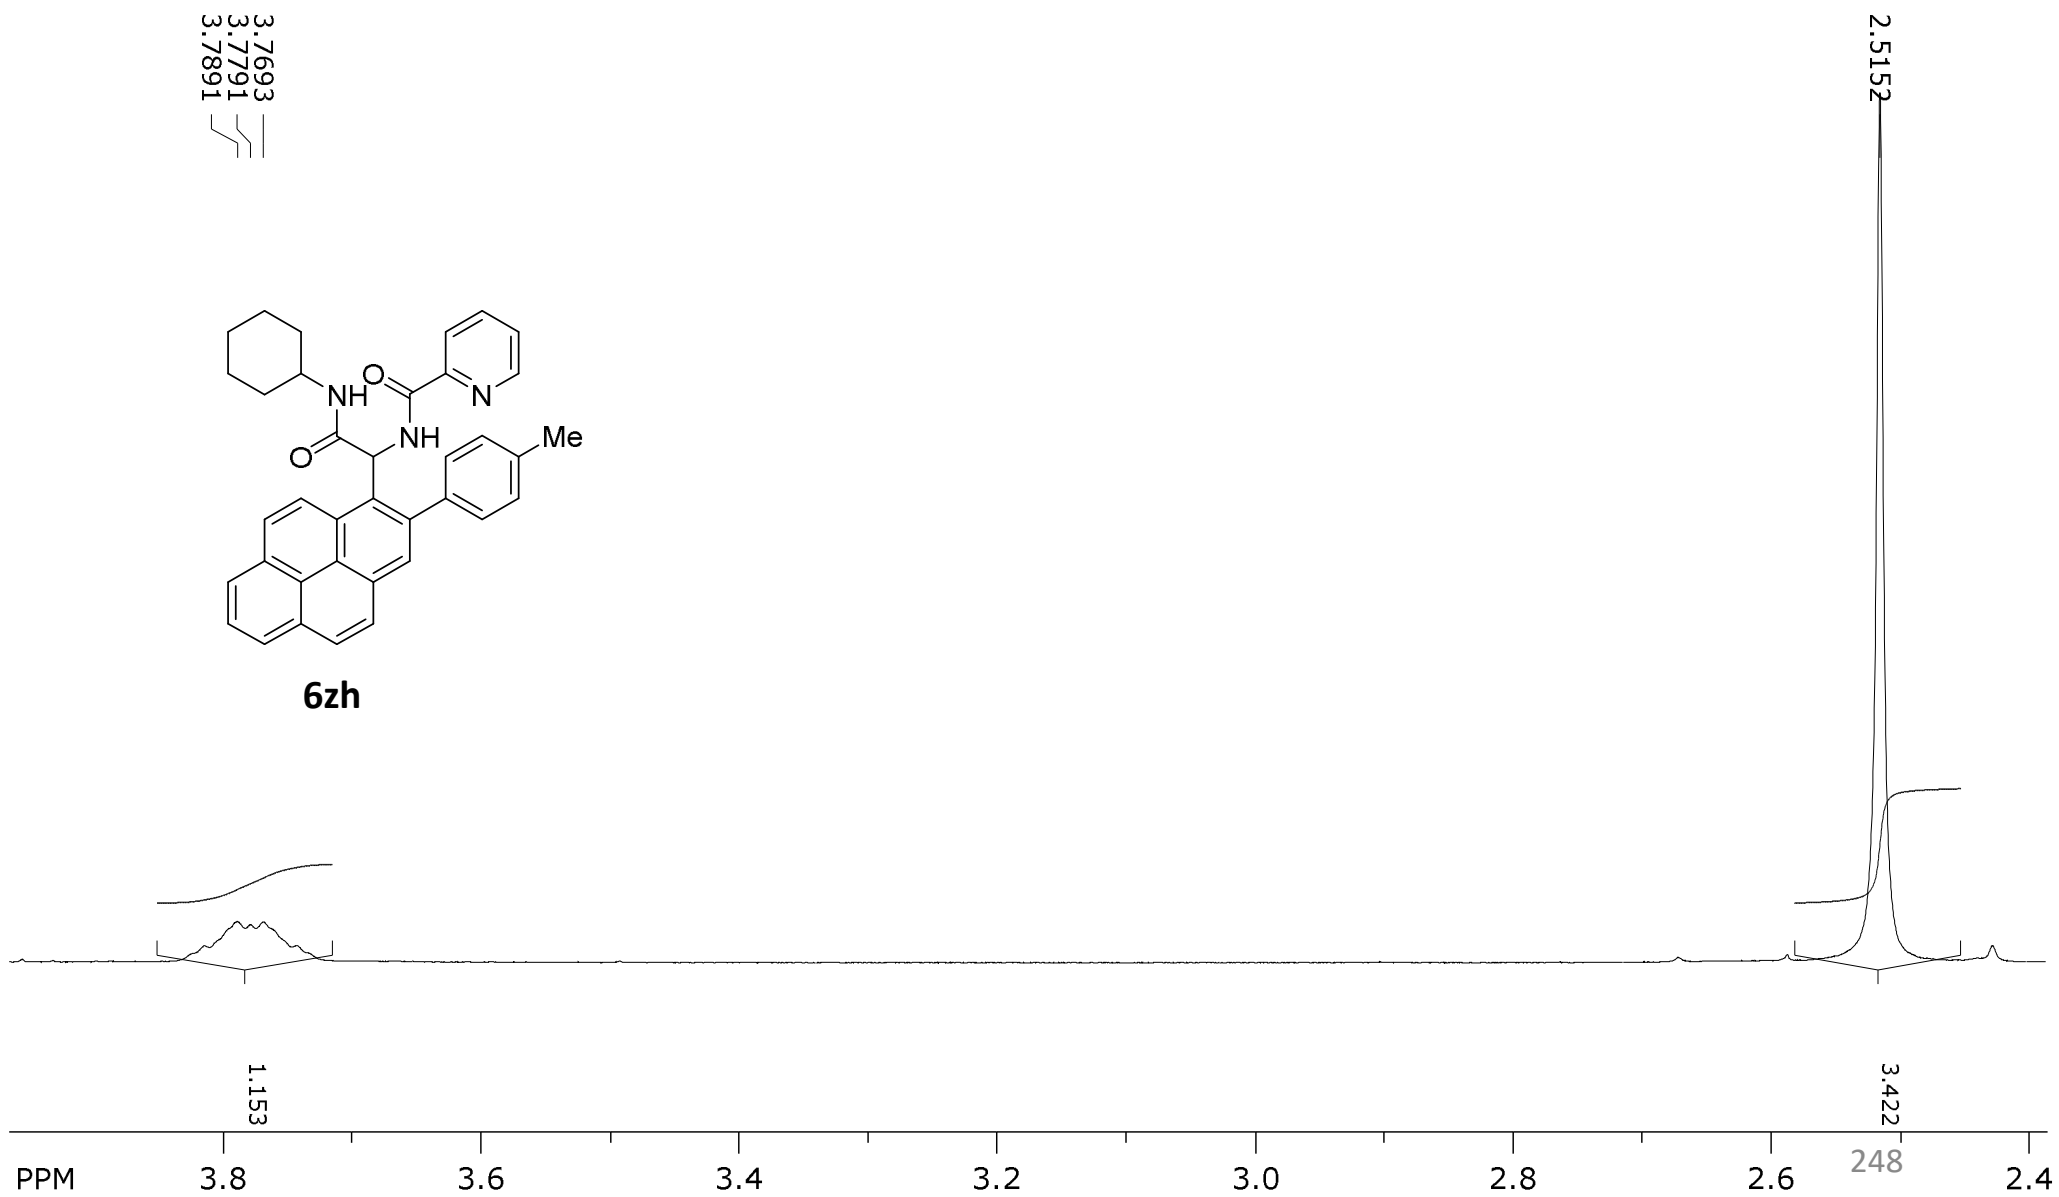



SpinWorks 4: AD-2265 Re  
PROTON CDCl3 /opt/topspin3.5pl2/nmrdata nmrsu 55

1.8501  
1.8506  
1.8534  
1.8561  
1.8667  
1.8695  
1.8705  
1.8798  
1.8806

1.7134  
1.7232  
1.7386  
1.7416  
1.7443  
1.7648  
1.7666  
1.7685  
1.7710  
1.7725  
1.7735  
1.7850  
1.7900  
1.7972  
1.7987  
1.8014

1.5960  
1.6037  
1.6133  
1.6203  
1.6217  
1.6294

1.5198  
1.5290

1.4946

1.4576



**6zh**

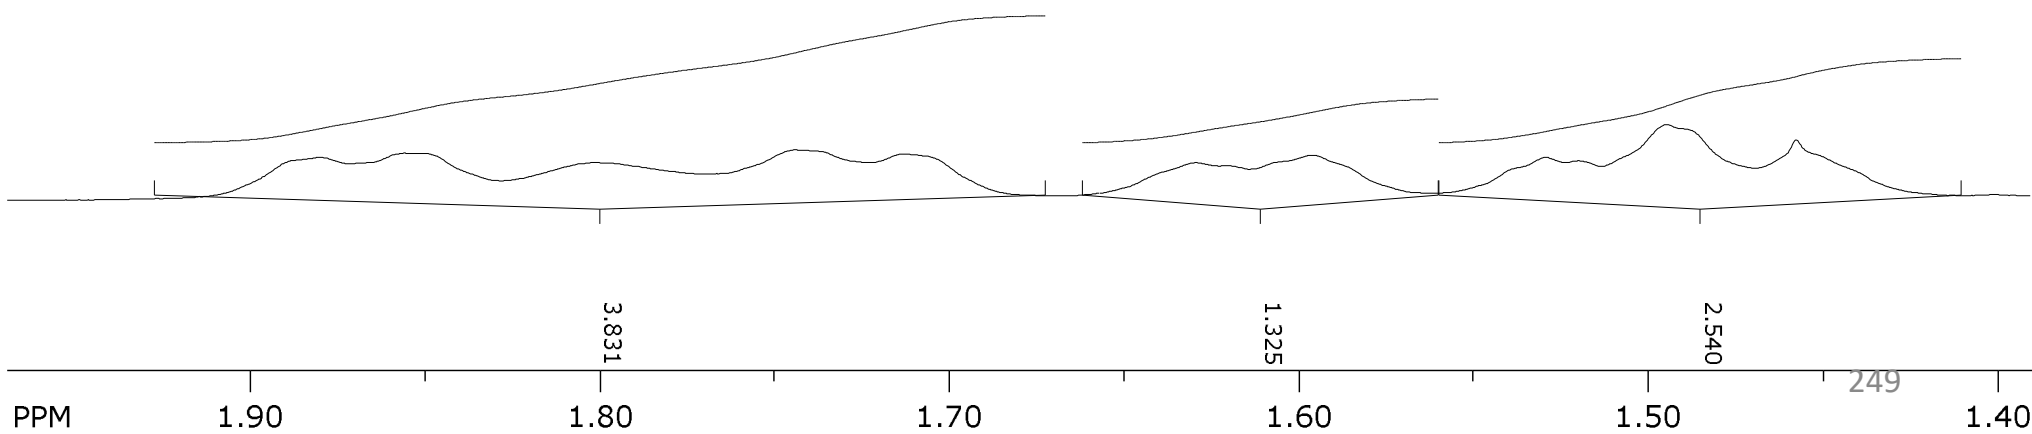

SpinWorks 4: AD-2265 Re  
PROTON CDCl3 /opt/topspin3.5pl2/nmrdata nmrsu 55

1.3317 —  
1.2976 —  
1.2855 —  
1.2693 —  
1.2591 —  
1.2516 —  
1.2438 —  
1.2223 —

1.0731 —  
1.0794 —  
1.0805 —  
1.0436 —  
1.0345 —  
1.0333 —  
1.0308 —  
1.0187 —  
0.9970 —  
0.9907 —  
0.9877 —

0.7982 —  
0.8023 —  
0.8270 —  
0.8283 —  
0.8303 —

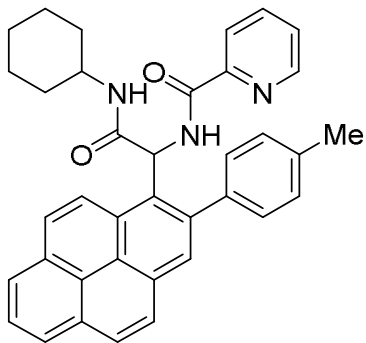

**6zh**

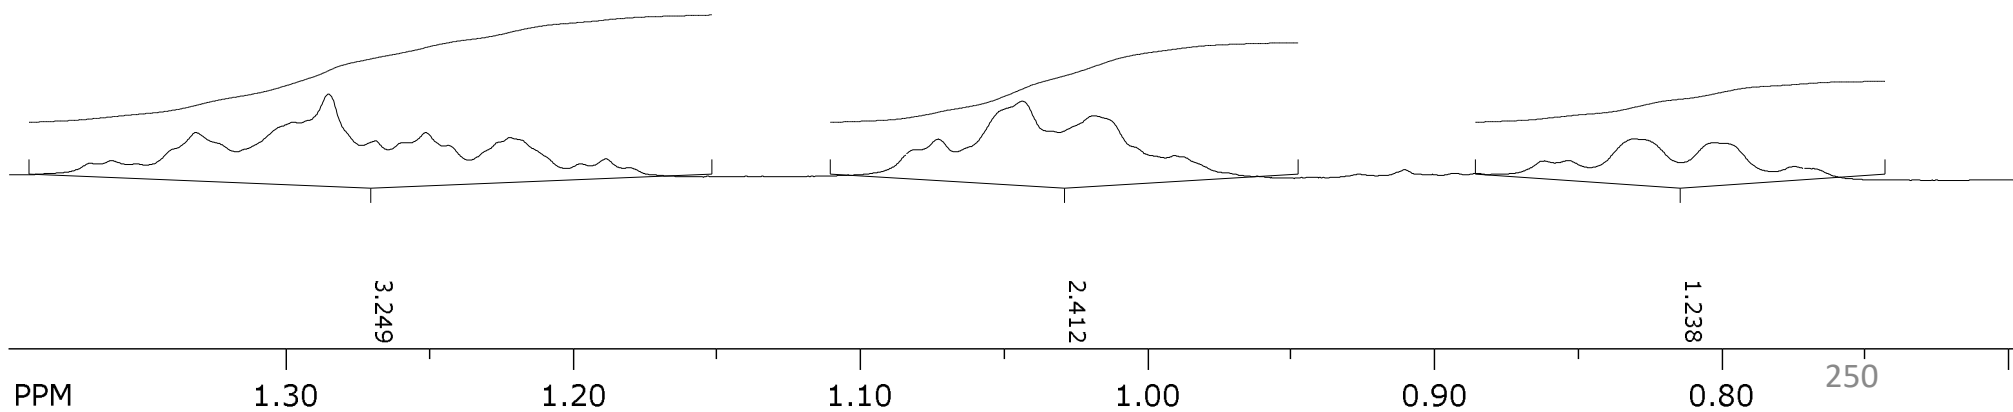

SpinWorks 4: AD-2265 Re  
C13CPD256 CDCl3 /opt/topspin3.5pl2/nmrdata nmrsu 55

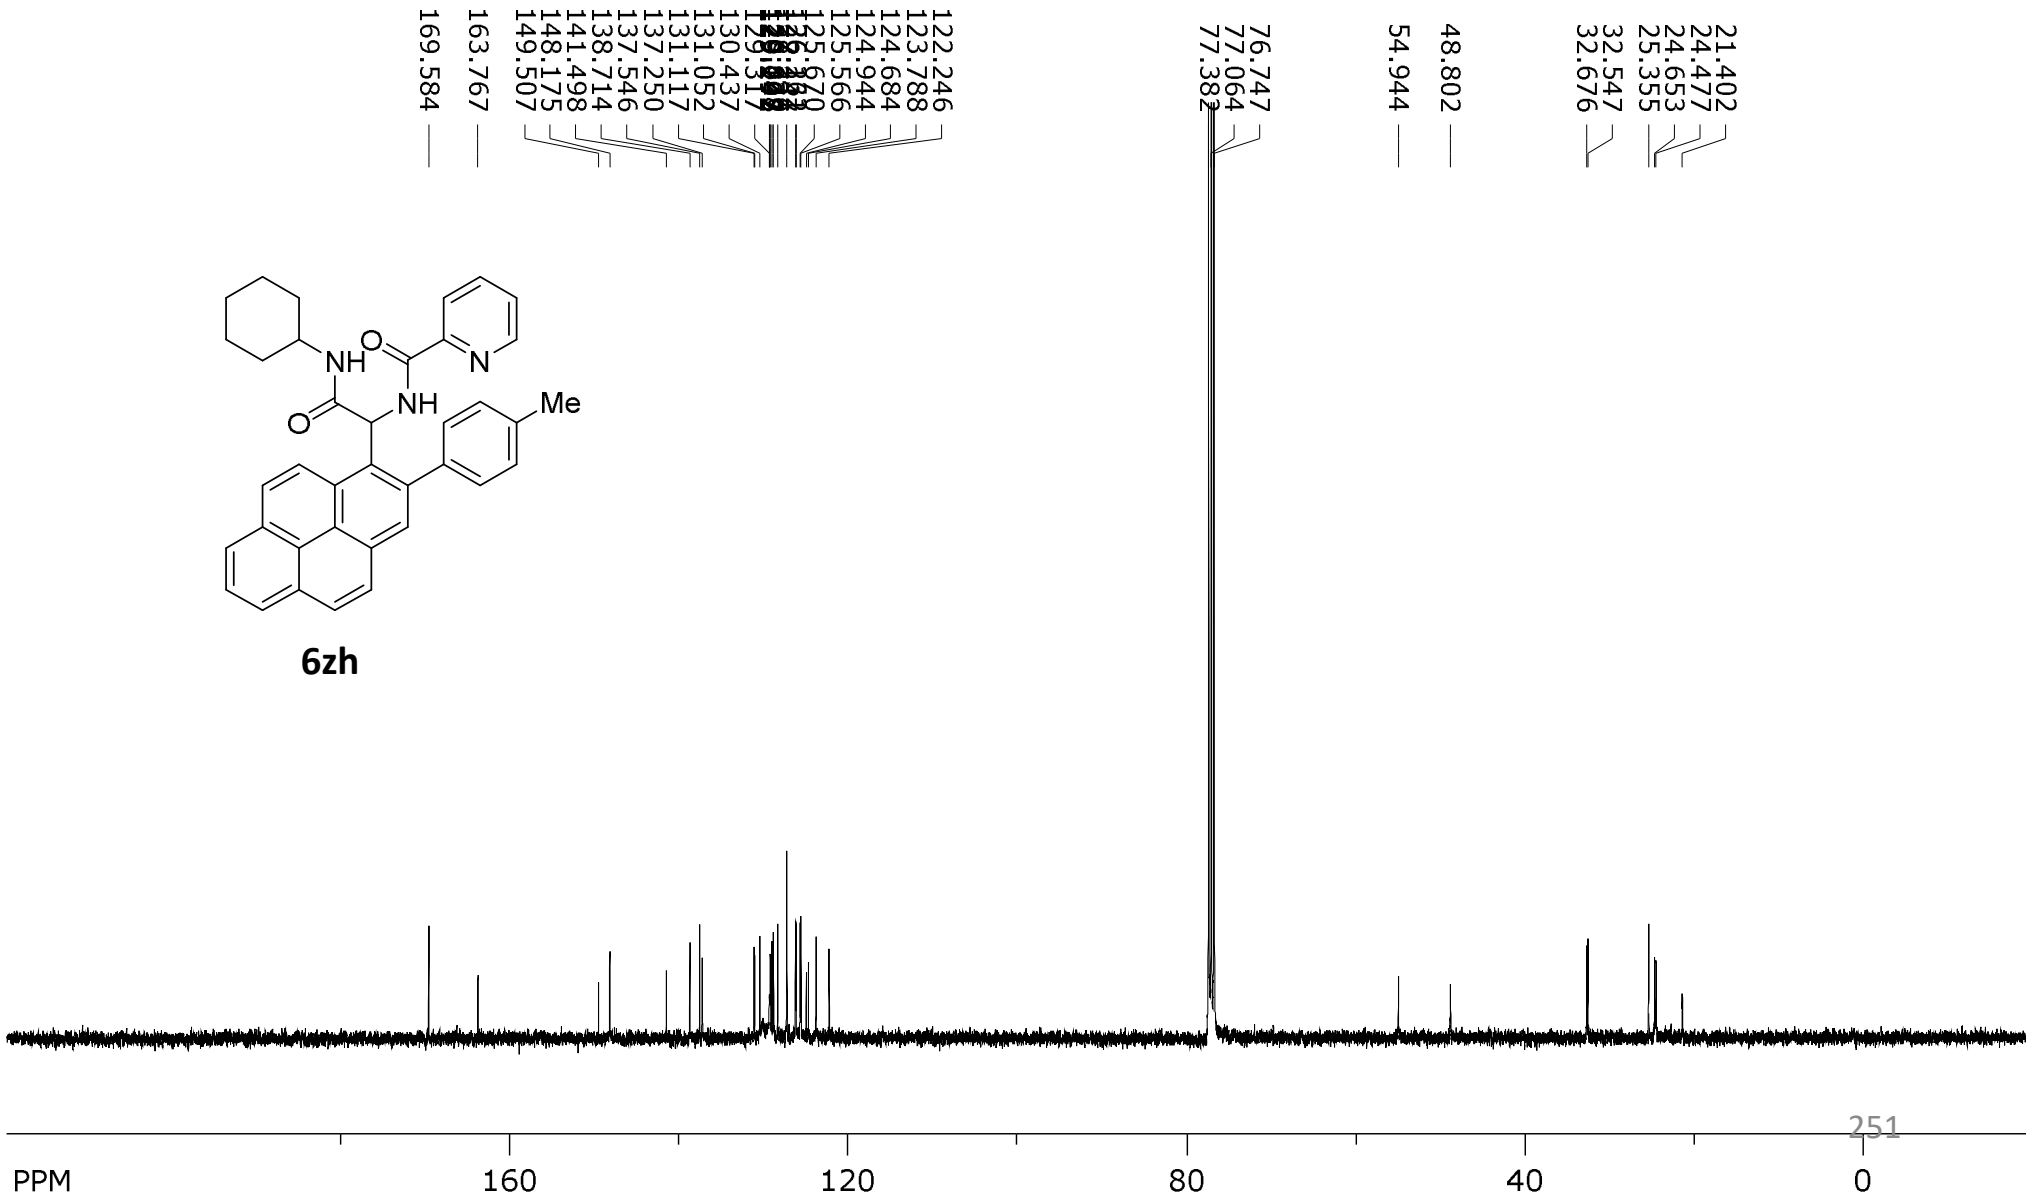

SpinWorks 4: AD-2265 Re  
C13CPD256 CDCl3 /opt/topspin3.5pl2/nmrdata nmrsu 55

169.584 —  
163.767 —  
149.507 —  
148.175 —  
141.498 —  
138.714 —  
137.250 —  
137.546 —  
131.117  
131.052  
130.437  
129.317  
129.292  
129.247  
129.195  
129.008  
128.827  
128.320  
127.247  
126.232  
126.161  
125.670  
125.566  
124.944  
124.684  
123.788  
122.246

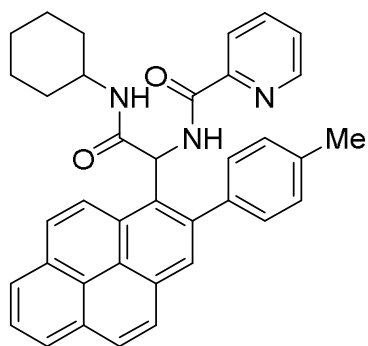

6zh

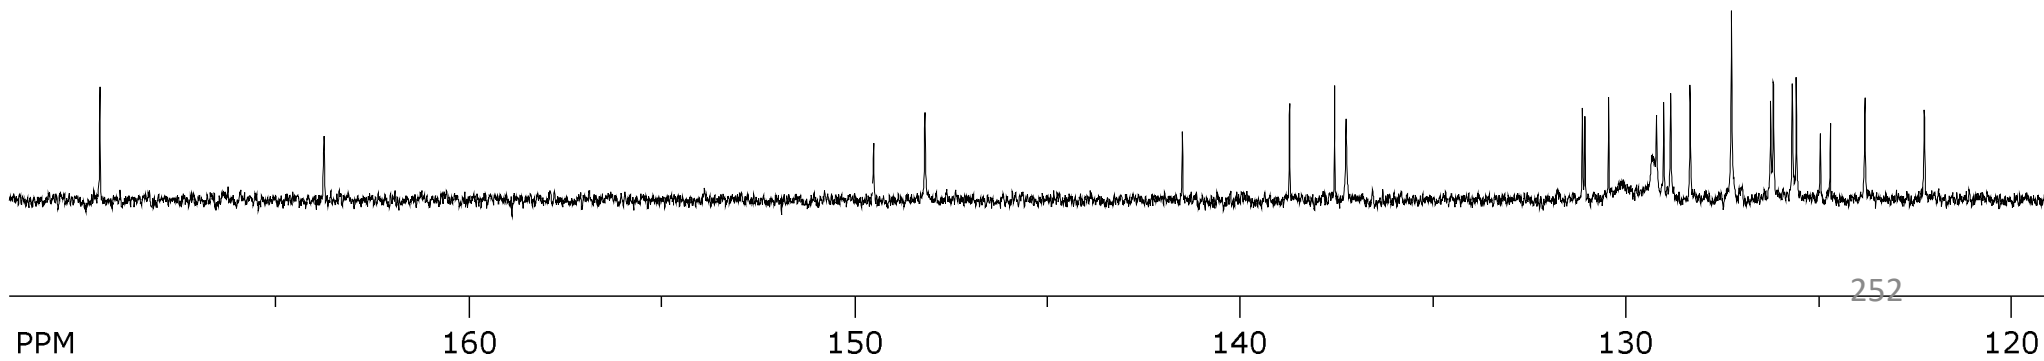

SpinWorks 4: AD-2265 Re  
C13CPD256 CDCl3 /opt/topspin3.5pl2/nmrdata nmrsu 55

54.944

48.802

32.547  
32.676

24.477  
24.653  
25.355

21.402



6zh

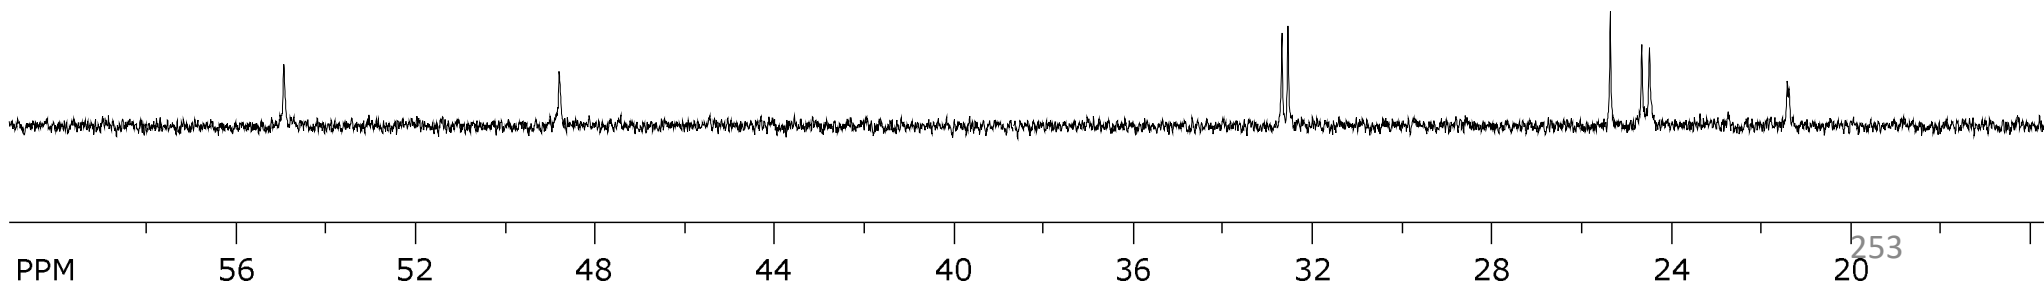

SpinWorks 4: AD-2262 Re  
PROTON CDCl3 /opt/topspin3.5pl2/nmrdata nmrsu 54

0.8103  
0.8191  
0.8404  
0.8461  
0.8470  
0.8704  
0.8708  
0.8712  
0.8716  
0.8720  
0.8724  
0.8728  
0.8732  
0.8736  
0.8740  
0.8744  
0.8748  
0.8752  
0.8756  
0.8760  
0.8764  
0.8768  
0.8772  
0.8776  
0.8780  
0.8784  
0.8788  
0.8792  
0.8796  
0.8800  
0.8804  
0.8808  
0.8812  
0.8816  
0.8820  
0.8824  
0.8828  
0.8832  
0.8836  
0.8840  
0.8844  
0.8848  
0.8852  
0.8856  
0.8860  
0.8864  
0.8868  
0.8872  
0.8876  
0.8880  
0.8884  
0.8888  
0.8892  
0.8896  
0.8900  
0.8904  
0.8908  
0.8912  
0.8916  
0.8920  
0.8924  
0.8928  
0.8932  
0.8936  
0.8940  
0.8944  
0.8948  
0.8952  
0.8956  
0.8960  
0.8964  
0.8968  
0.8972  
0.8976  
0.8980  
0.8984  
0.8988  
0.8992  
0.8996  
0.9000  
0.9004  
0.9008  
0.9012  
0.9016  
0.9020  
0.9024  
0.9028  
0.9032  
0.9036  
0.9040  
0.9044  
0.9048  
0.9052  
0.9056  
0.9060  
0.9064  
0.9068  
0.9072  
0.9076  
0.9080  
0.9084  
0.9088  
0.9092  
0.9096  
0.9100  
0.9104  
0.9108  
0.9112  
0.9116  
0.9120  
0.9124  
0.9128  
0.9132  
0.9136  
0.9140  
0.9144  
0.9148  
0.9152  
0.9156  
0.9160  
0.9164  
0.9168  
0.9172  
0.9176  
0.9180  
0.9184  
0.9188  
0.9192  
0.9196  
0.9200  
0.9204  
0.9208  
0.9212  
0.9216  
0.9220  
0.9224  
0.9228  
0.9232  
0.9236  
0.9240  
0.9244  
0.9248  
0.9252  
0.9256  
0.9260  
0.9264  
0.9268  
0.9272  
0.9276  
0.9280  
0.9284  
0.9288  
0.9292  
0.9296  
0.9300  
0.9304  
0.9308  
0.9312  
0.9316  
0.9320  
0.9324  
0.9328  
0.9332  
0.9336  
0.9340  
0.9344  
0.9348  
0.9352  
0.9356  
0.9360  
0.9364  
0.9368  
0.9372  
0.9376  
0.9380  
0.9384  
0.9388  
0.9392  
0.9396  
0.9400  
0.9404  
0.9408  
0.9412  
0.9416  
0.9420  
0.9424  
0.9428  
0.9432  
0.9436  
0.9440  
0.9444  
0.9448  
0.9452  
0.9456  
0.9460  
0.9464  
0.9468  
0.9472  
0.9476  
0.9480  
0.9484  
0.9488  
0.9492  
0.9496  
0.9500  
0.9504  
0.9508  
0.9512  
0.9516  
0.9520  
0.9524  
0.9528  
0.9532  
0.9536  
0.9540  
0.9544  
0.9548  
0.9552  
0.9556  
0.9560  
0.9564  
0.9568  
0.9572  
0.9576  
0.9580  
0.9584  
0.9588  
0.9592  
0.9596  
0.9600  
0.9604  
0.9608  
0.9612  
0.9616  
0.9620  
0.9624  
0.9628  
0.9632  
0.9636  
0.9640  
0.9644  
0.9648  
0.9652  
0.9656  
0.9660  
0.9664  
0.9668  
0.9672  
0.9676  
0.9680  
0.9684  
0.9688  
0.9692  
0.9696  
0.9700  
0.9704  
0.9708  
0.9712  
0.9716  
0.9720  
0.9724  
0.9728  
0.9732  
0.9736  
0.9740  
0.9744  
0.9748  
0.9752  
0.9756  
0.9760  
0.9764  
0.9768  
0.9772  
0.9776  
0.9780  
0.9784  
0.9788  
0.9792  
0.9796  
0.9800  
0.9804  
0.9808  
0.9812  
0.9816  
0.9820  
0.9824  
0.9828  
0.9832  
0.9836  
0.9840  
0.9844  
0.9848  
0.9852  
0.9856  
0.9860  
0.9864  
0.9868  
0.9872  
0.9876  
0.9880  
0.9884  
0.9888  
0.9892  
0.9896  
0.9900  
0.9904  
0.9908  
0.9912  
0.9916  
0.9920  
0.9924  
0.9928  
0.9932  
0.9936  
0.9940  
0.9944  
0.9948  
0.9952  
0.9956  
0.9960  
0.9964  
0.9968  
0.9972  
0.9976  
0.9980  
0.9984  
0.9988  
0.9992  
0.9996  
1.0000

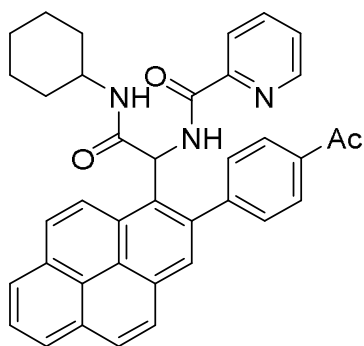

6zi

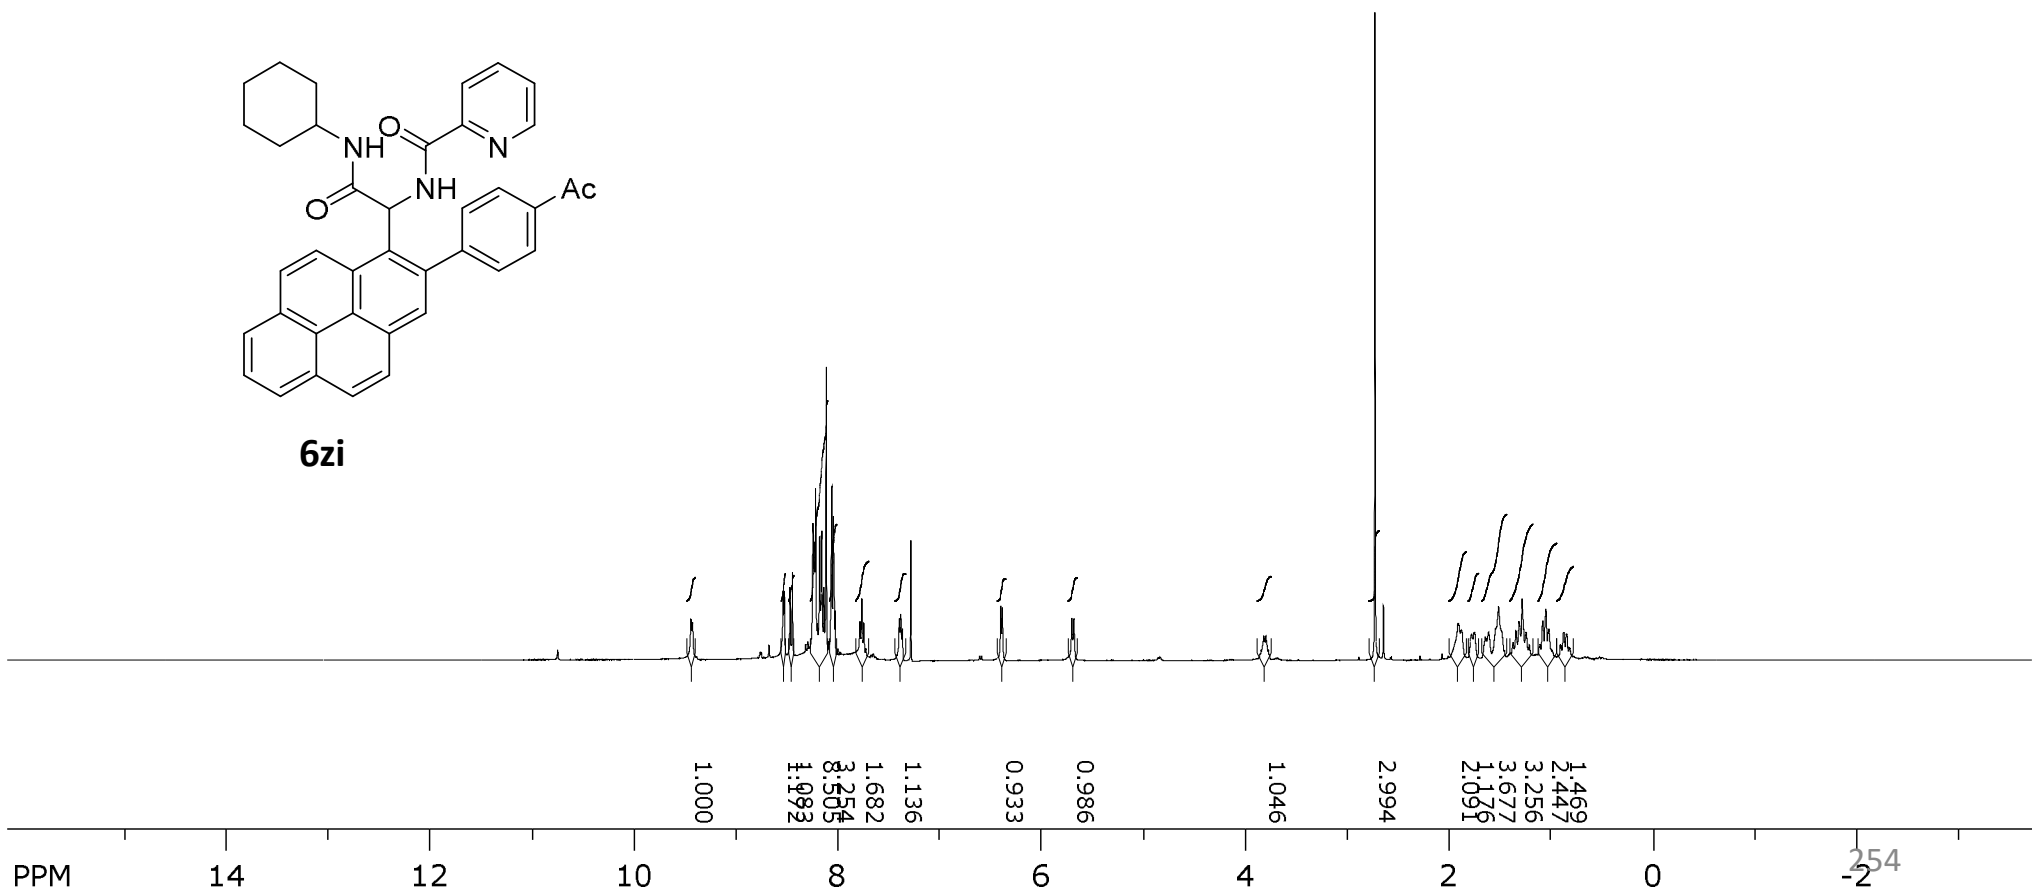

SpinWorks 4: AD-2262 Re  
PROTON CDCl3 /opt/topspin3.5pl2/nmrdata nmrsu 54

9.4281  
9.4430

8.5268  
8.5379

8.4469  
8.4702



**6zi**

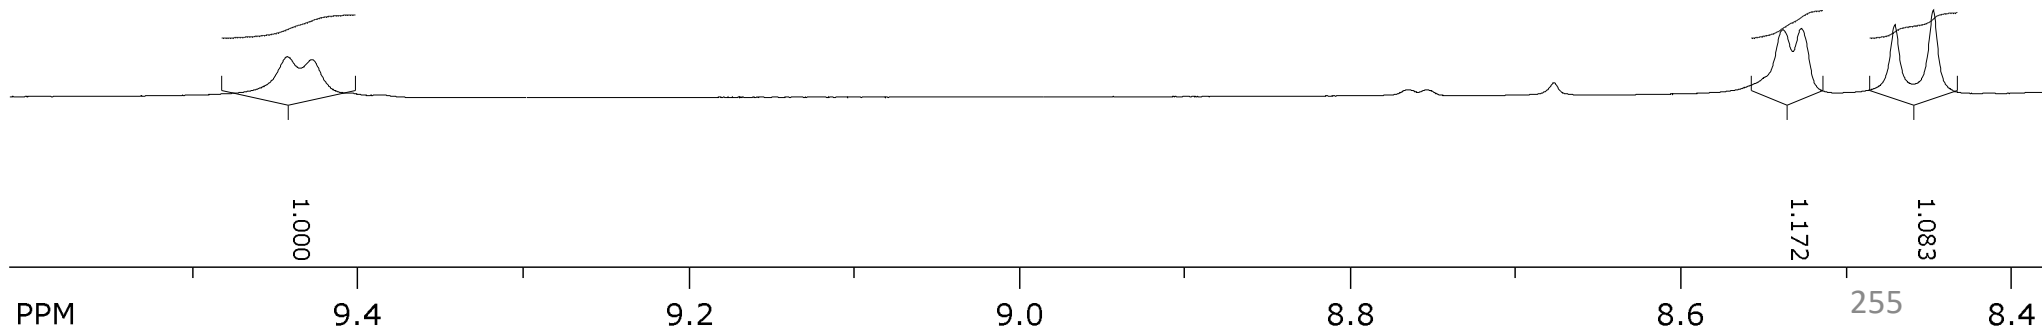

SpinWorks 4: AD-2262 Re  
PROTON CDCl3 /opt/topspin3.5pl2/nmrdata nmrsu 54

8.2434 —  
8.2348 —  
8.2289 —  
8.2191 —  
8.2002 —  
8.1793 —  
8.1588 —  
8.1373 —  
8.1280 —  
8.1143 —  
8.0596 —  
8.0457 —  
8.0385 —  
8.0272 —

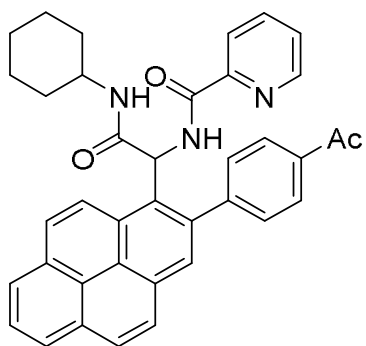

**6zi**

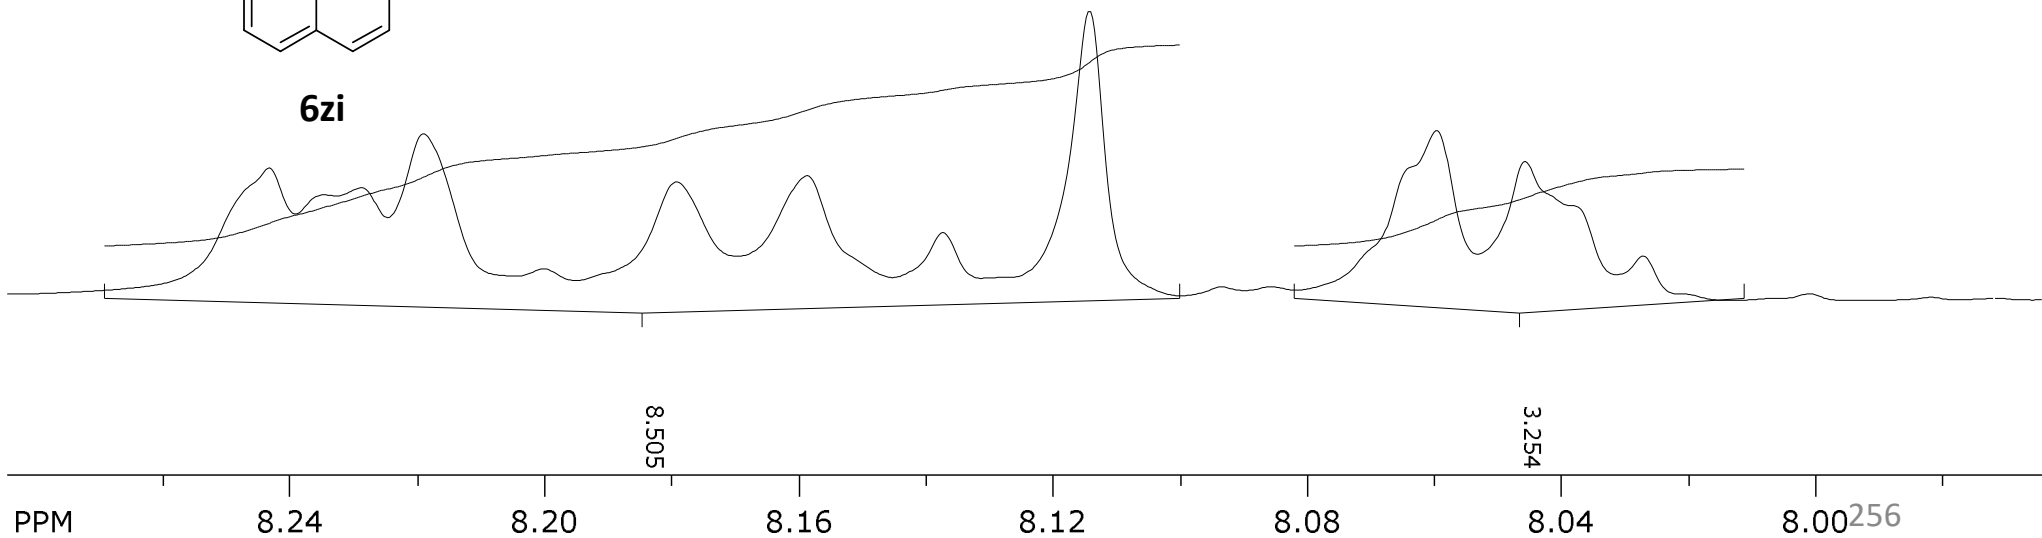



SpinWorks 4: AD-2262 Re  
PROTON CDCl3 /opt/topspin3.5pl2/nmrdata nmrsu 54

7.7459 —  
7.7652 —  
7.7844 —

7.3672 —  
7.3846 —  
7.3970 —

7.2835 —



**6zi**

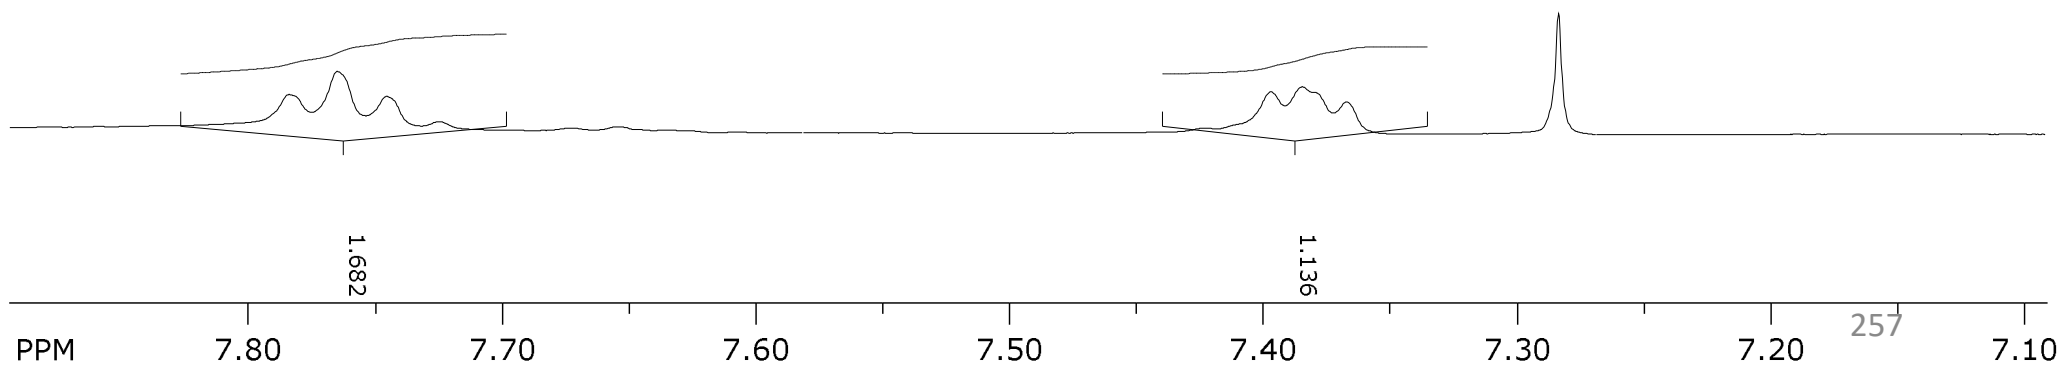

SpinWorks 4: AD-2262 Re  
PROTON CDCl3 /opt/topspin3.5pl2/nmrdata nmrsu 54

6.3855  
6.4009

5.6829  
5.7027

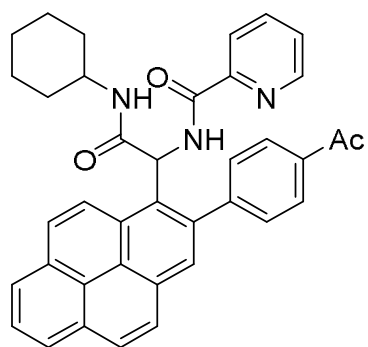

**6zi**

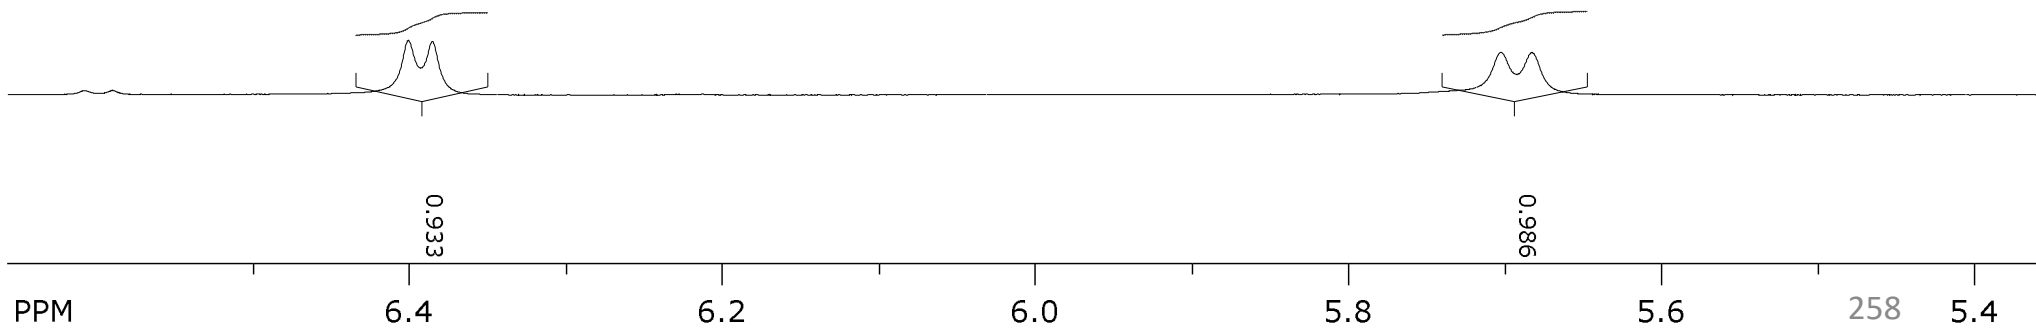

SpinWorks 4: AD-2262 Re  
PROTON CDCl3 /opt/topspin3.5pl2/nmrdata nmrsu 54

3.7825  
3.7915  
3.7980  
3.8080  
3.8178  
3.8248

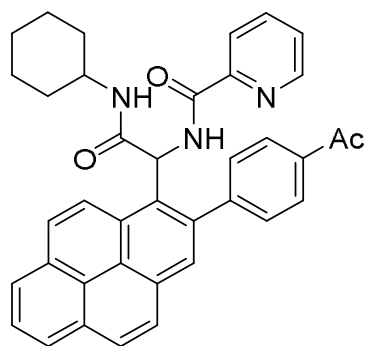

6zi

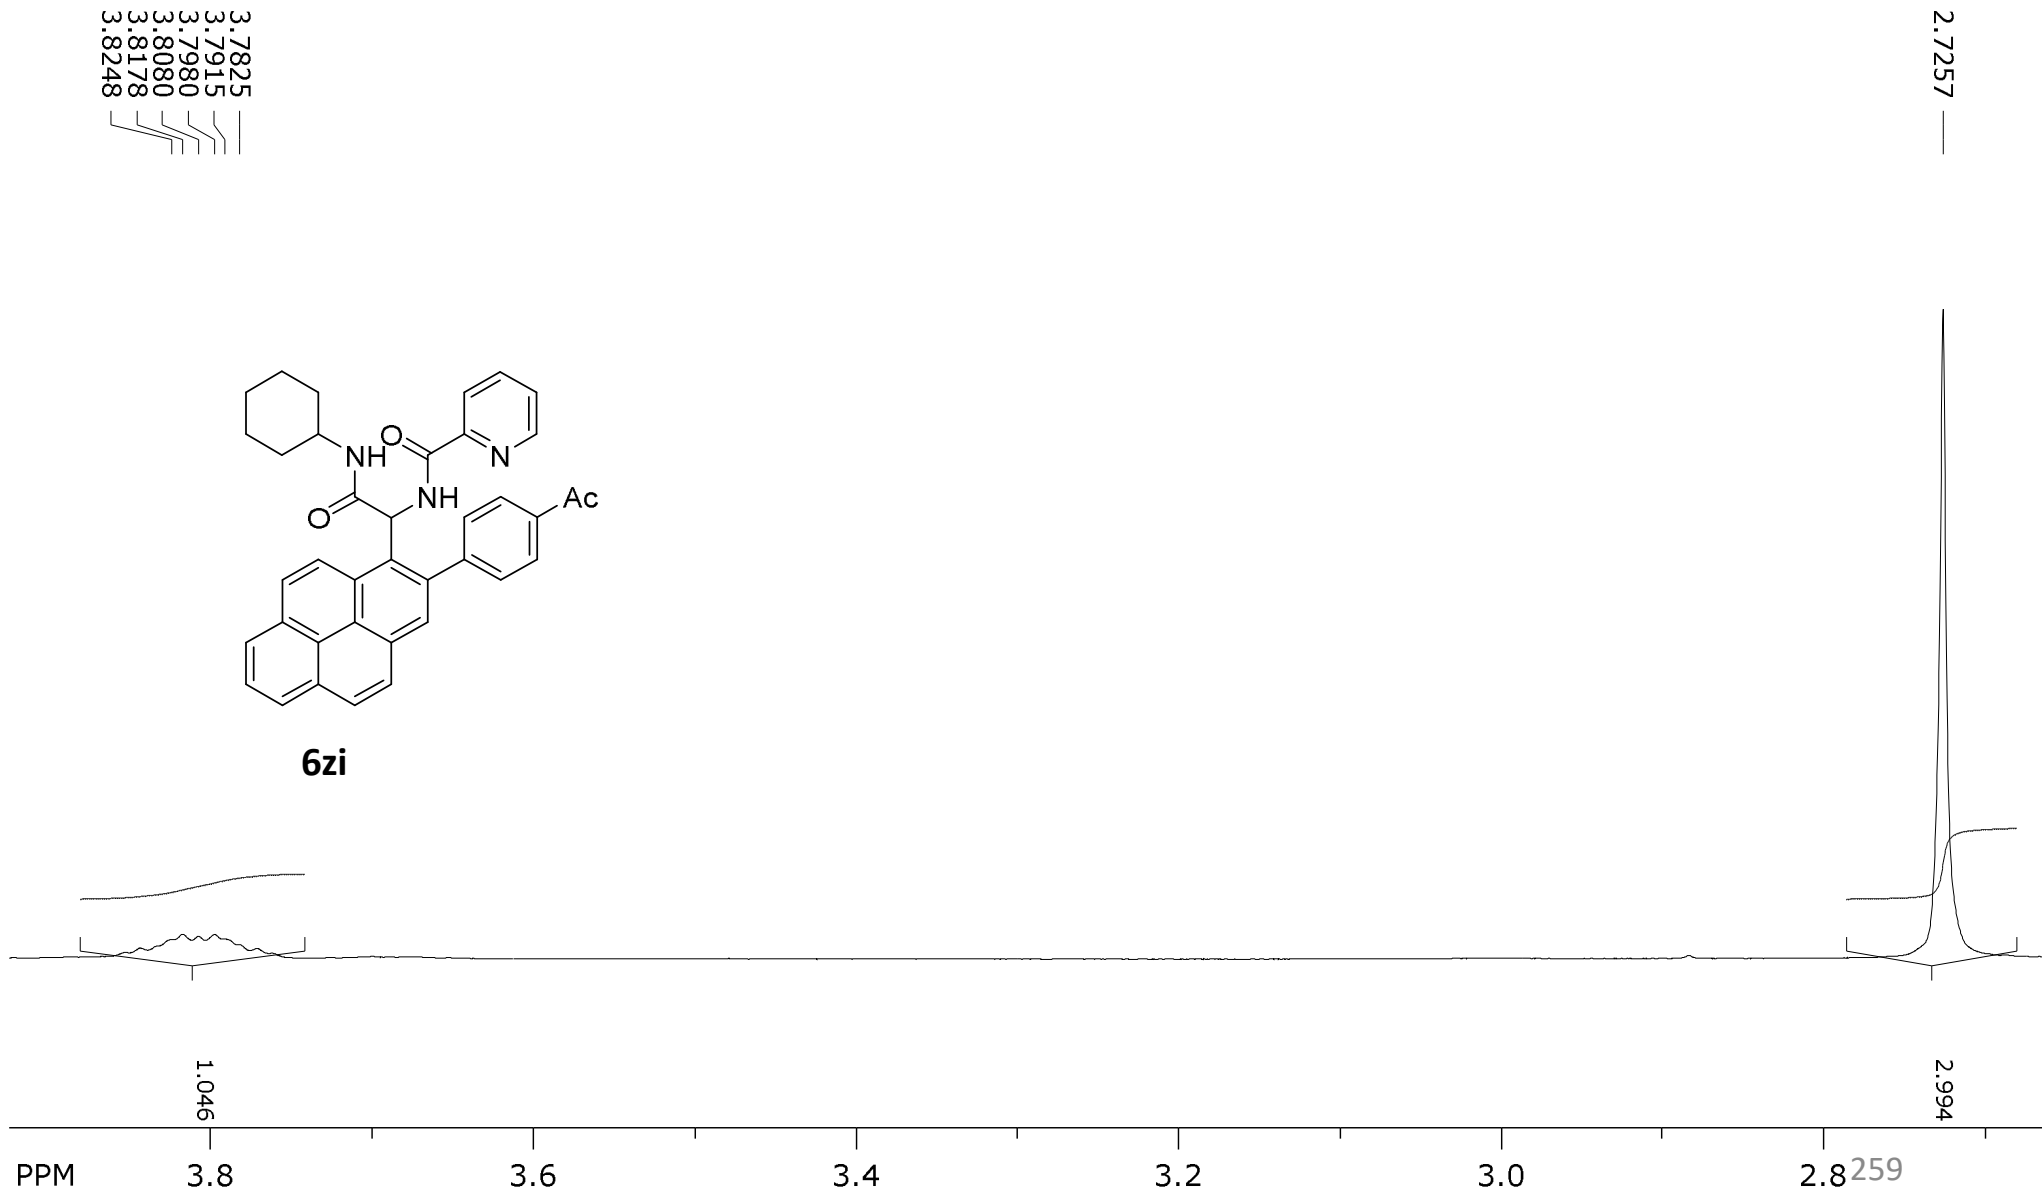

SpinWorks 4: AD-2262 Re  
PROTON CDCl3 /opt/topspin3.5pl2/nmrdata nmrsu 54

1.9033  
1.9050  
1.9070  
1.9099

1.8718  
1.8790

1.7468  
1.7492  
1.7518  
1.7527  
1.7678  
1.7763

1.6093  
1.6331  
1.6427

1.5115  
1.5327  
1.5424  
1.4820  
1.4838  
1.4917

1.3407  
1.3624  
1.3687  
1.3777

1.2807  
1.3072  
1.3114

1.2094  
1.2182  
1.2390  
1.2427

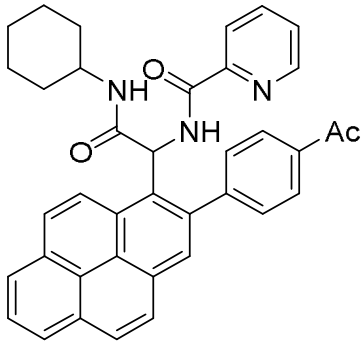

6zi

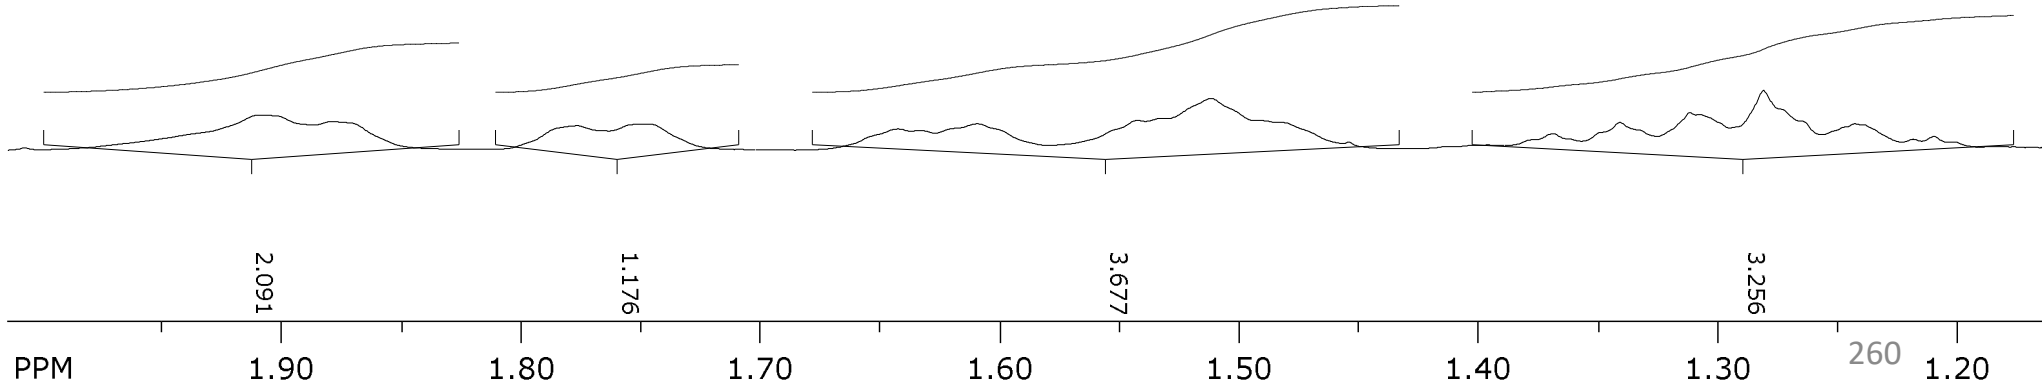

SpinWorks 4: AD-2262 Re  
PROTON CDCl3 /opt/topspin3.5pl2/nmrdata nmrsu 54

1.1121 —  
1.1034 —  
1.0767 —  
1.0469 —  
1.0248 —  
1.0167 —  
0.9059 —  
0.8972 —  
0.8746 —  
0.8708 —  
0.8704 —  
0.8470 —  
0.8461 —  
0.8404 —  
0.8191 —  
0.8103 —



**6zi**

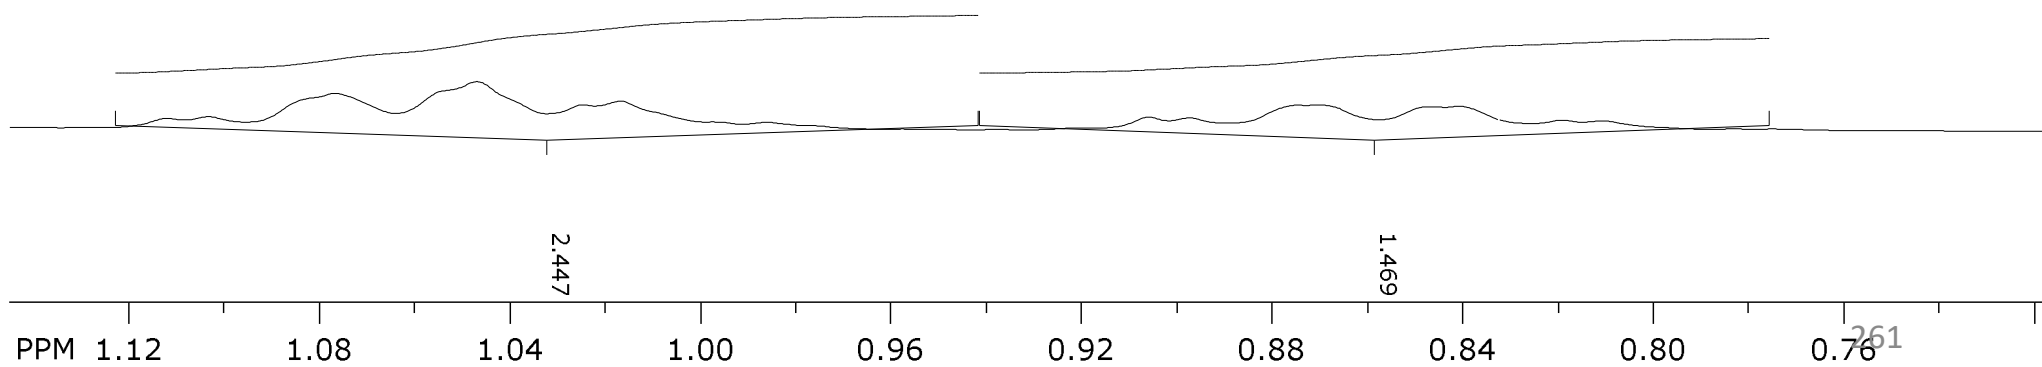

SpinWorks 4: AD-2262 Re  
C13CPD256 CDCl3 /opt/topspin3.5pl2/nmrdata nmrsu 54



6zi

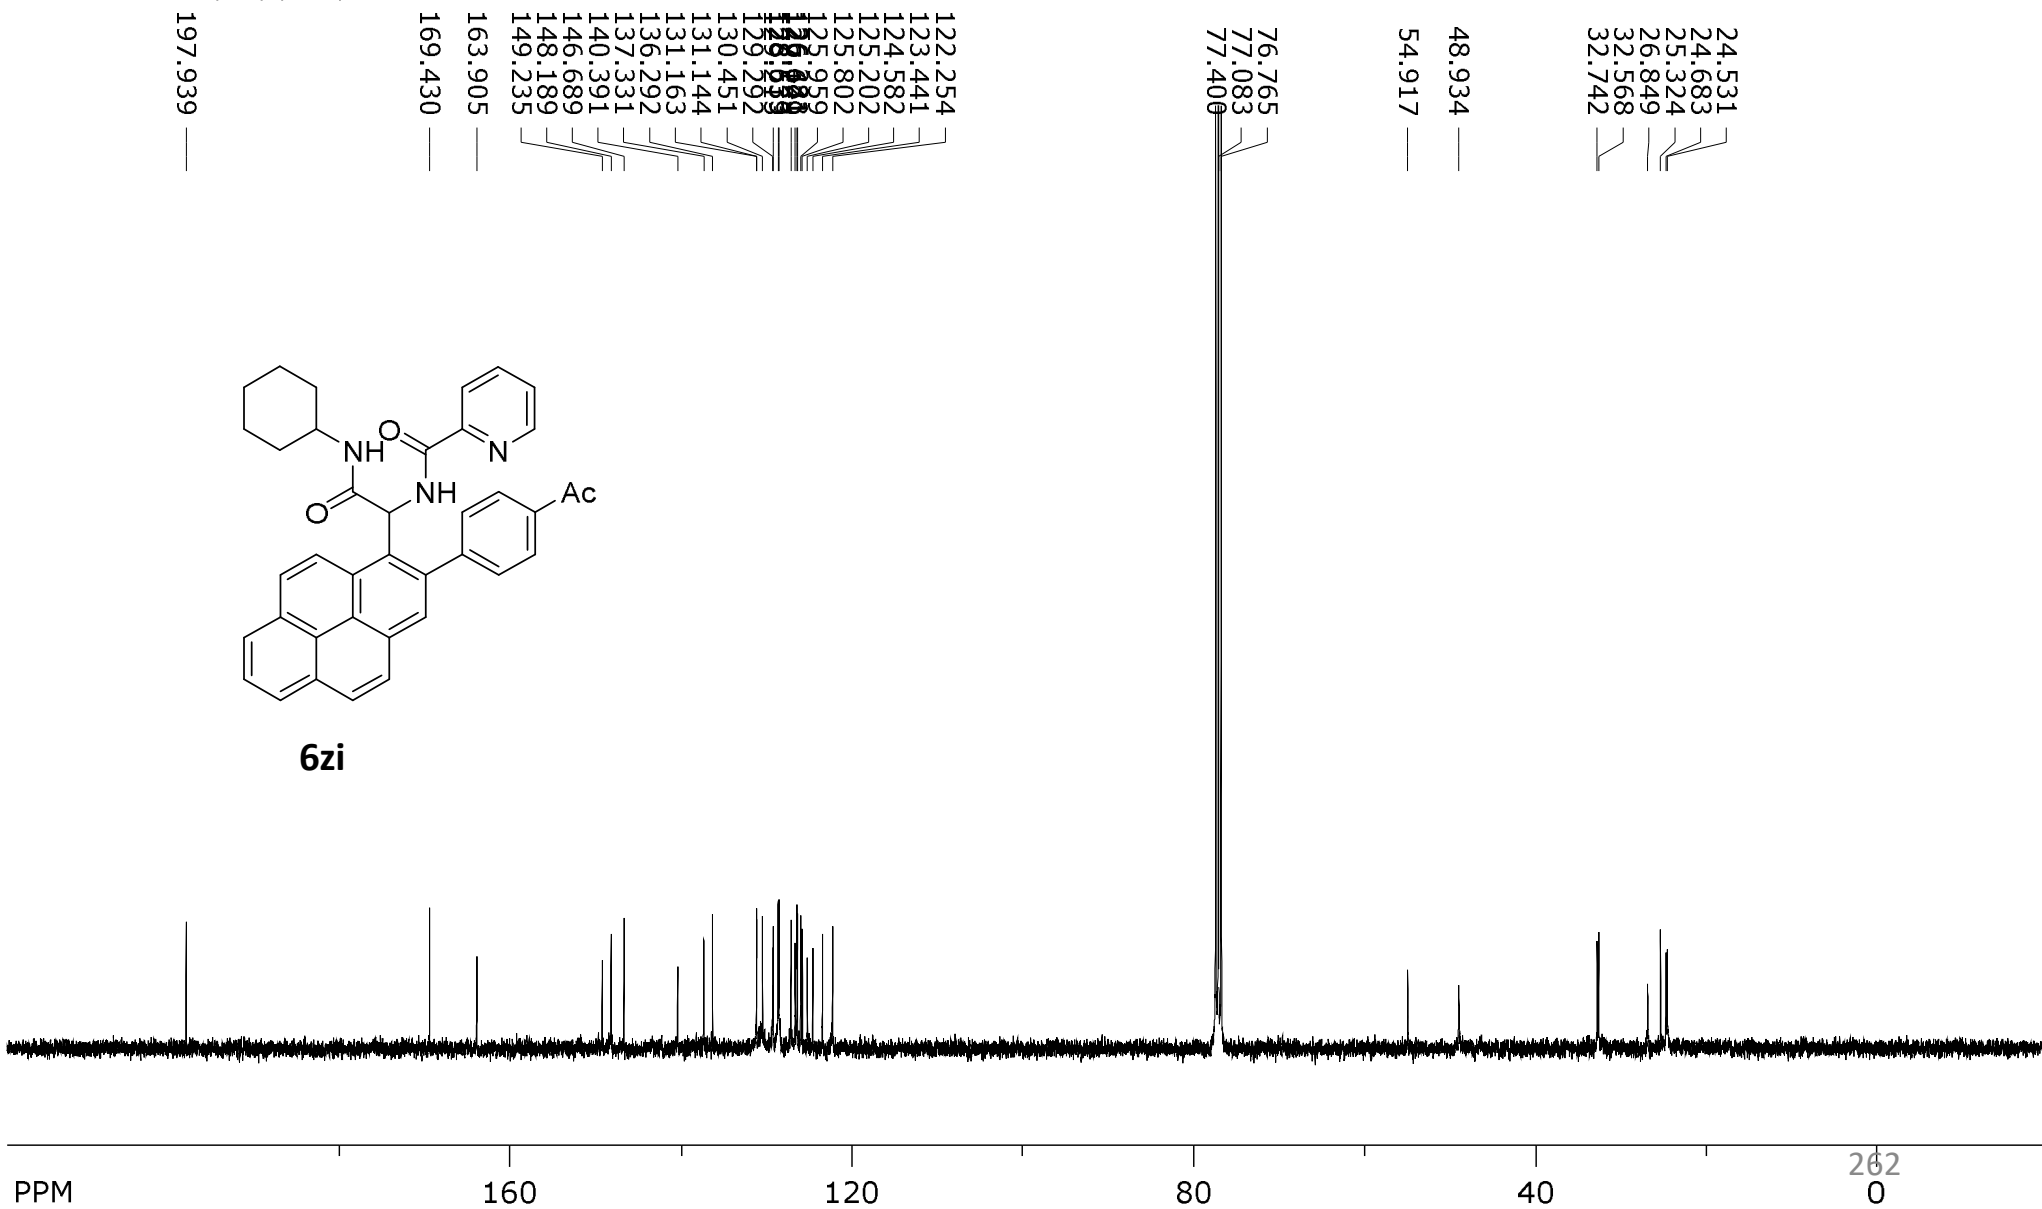

SpinWorks 4: AD-2262 Re  
C13CPD256 CDCl3 /opt/topspin3.5pl2/nmrdata nmrsu 54

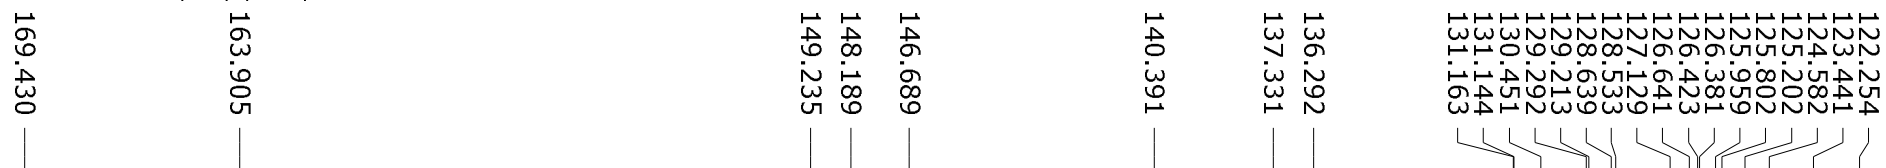

6zi

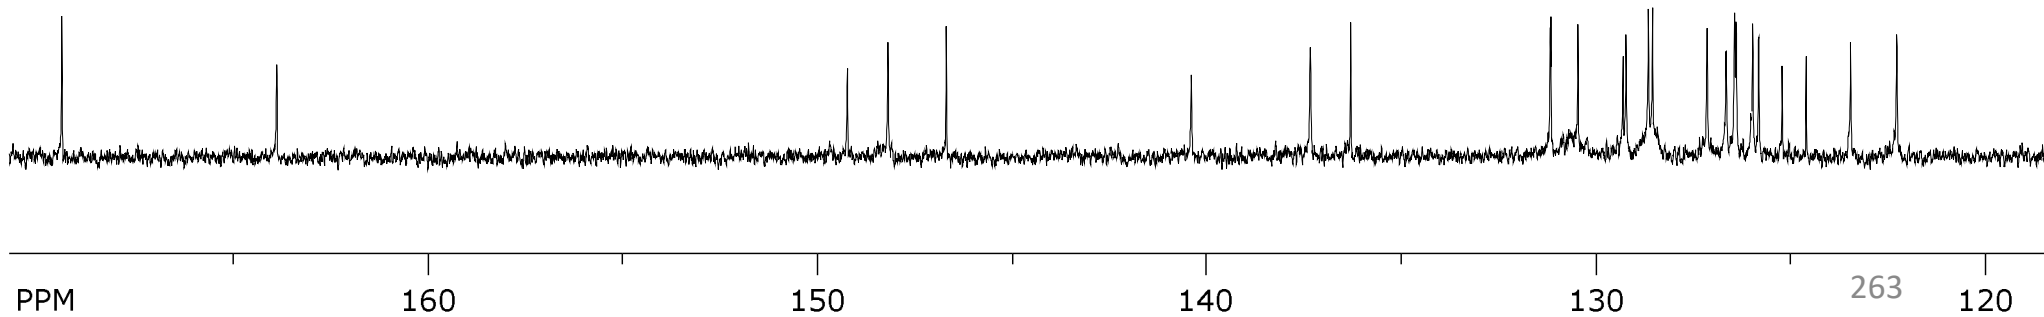

SpinWorks 4: AD-2262 Re  
C13CPD256 CDCl3 /opt/topspin3.5pl2/nmrdata nmrsu 54

54.917

48.934

32.568  
32.742

26.849

24.531  
24.683  
25.324



6zi

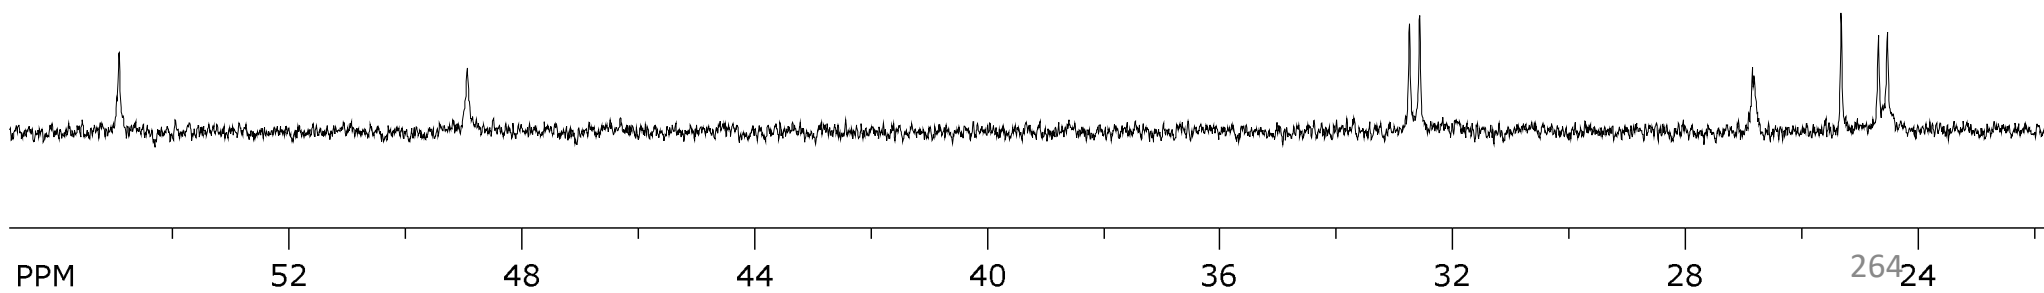



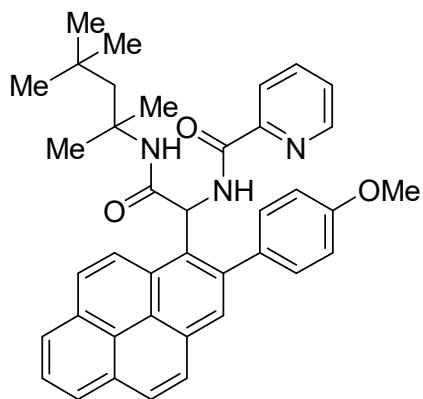

6zj

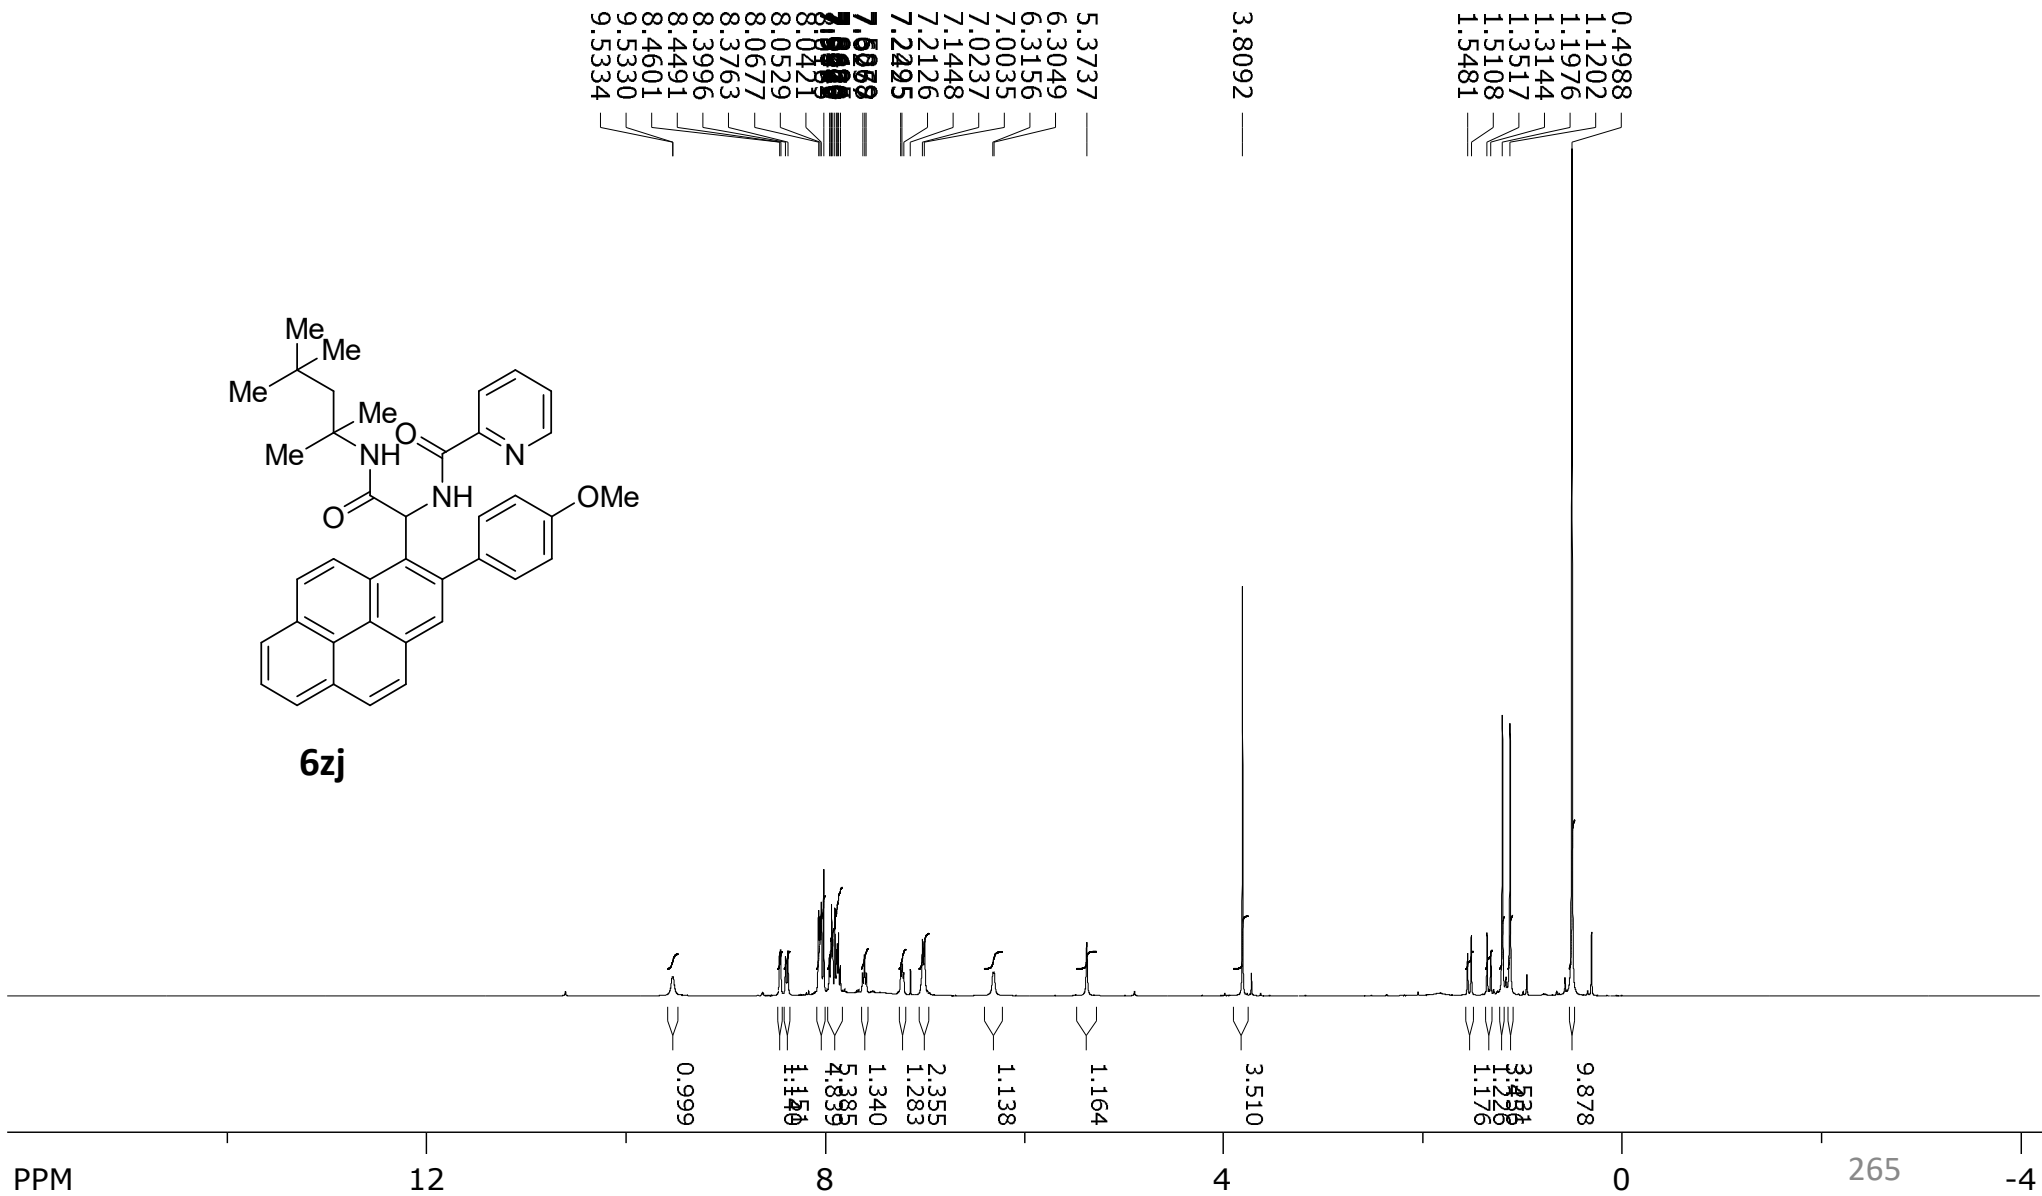



6zj

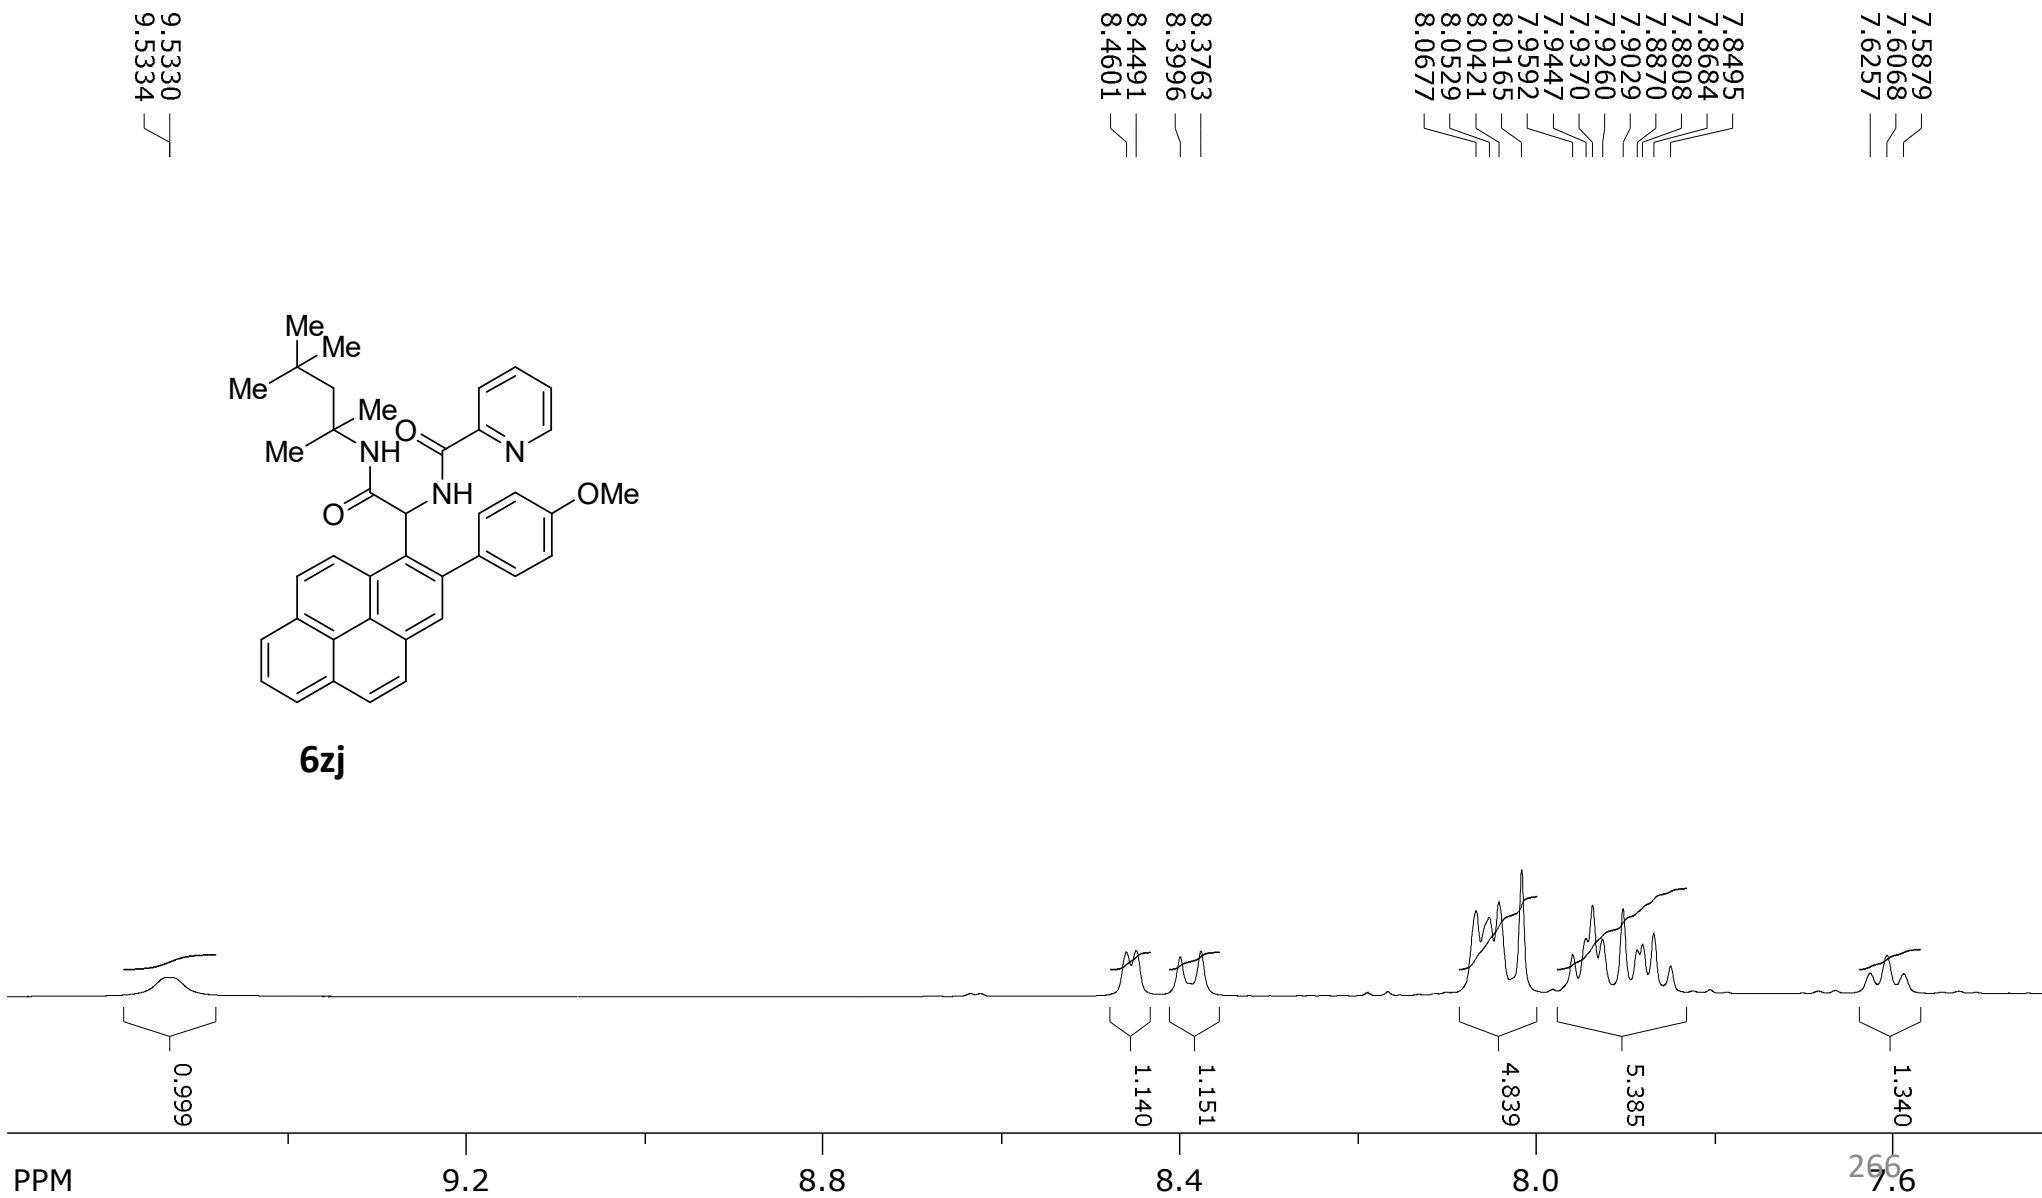

SpinWorks 4: AD-2259

7.0035  
7.0237  
7.1448  
7.2126  
7.2295  
7.2425

6.3049  
6.3156

5.3737

3.8092

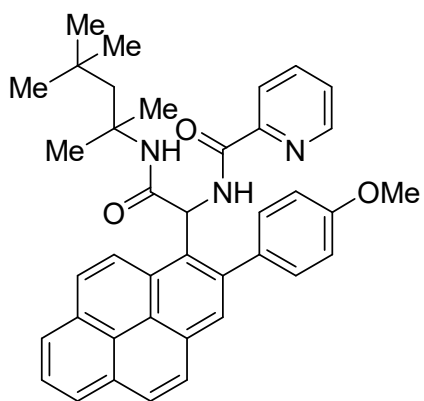

6zj

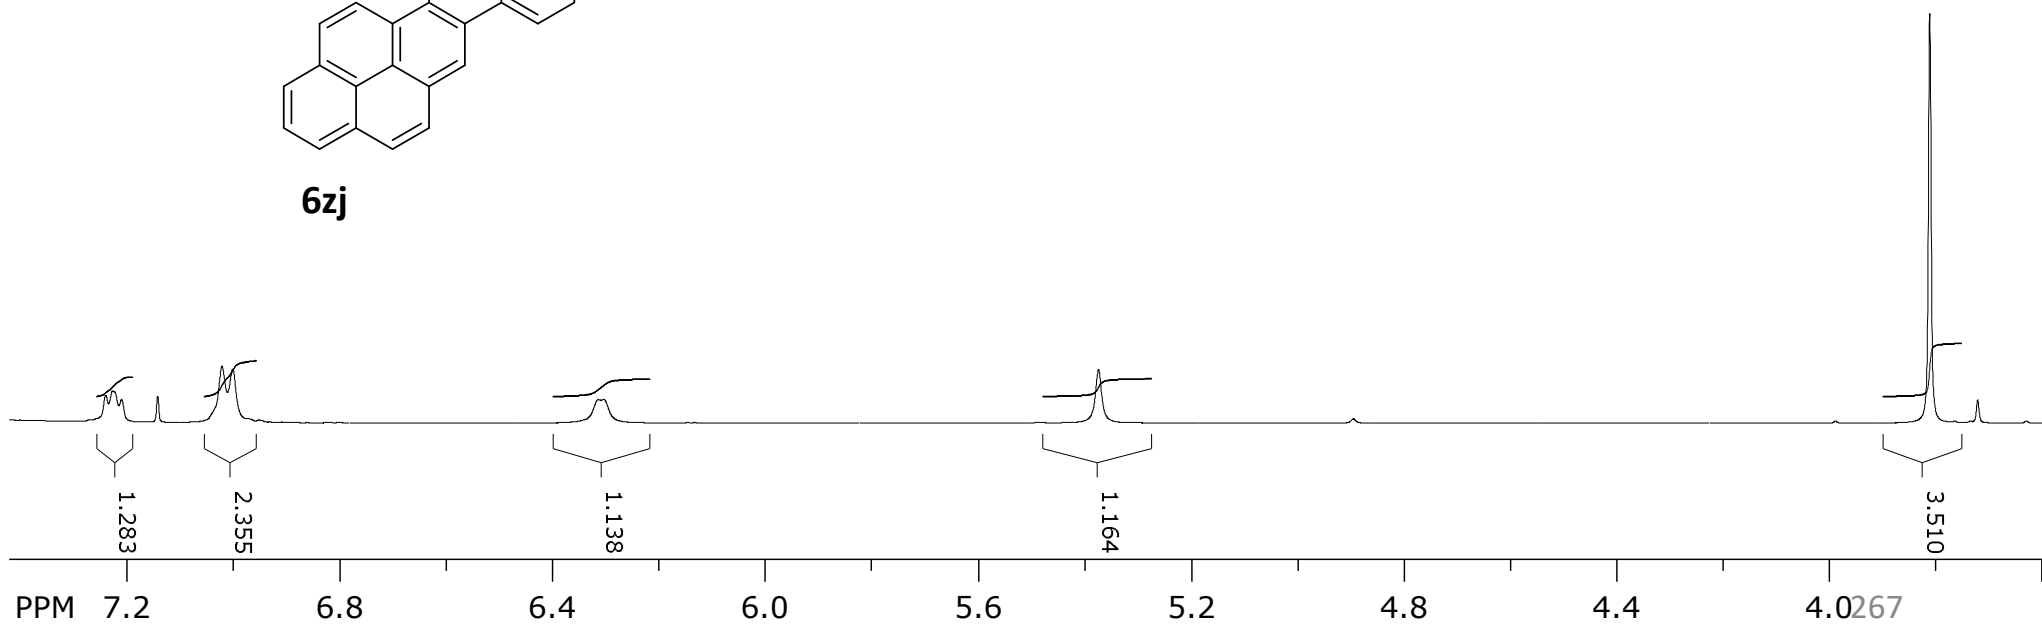

1.5481  
1.5108  
1.5481

1.3517  
1.3144  
1.3517

1.1976  
1.1202

0.4988

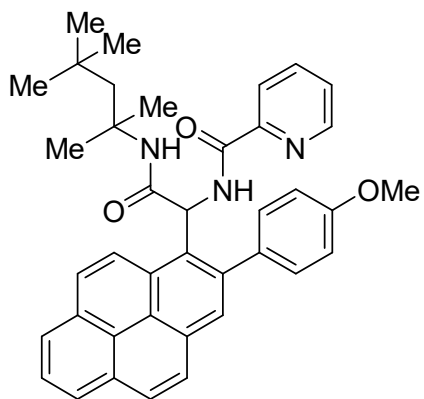

6zj

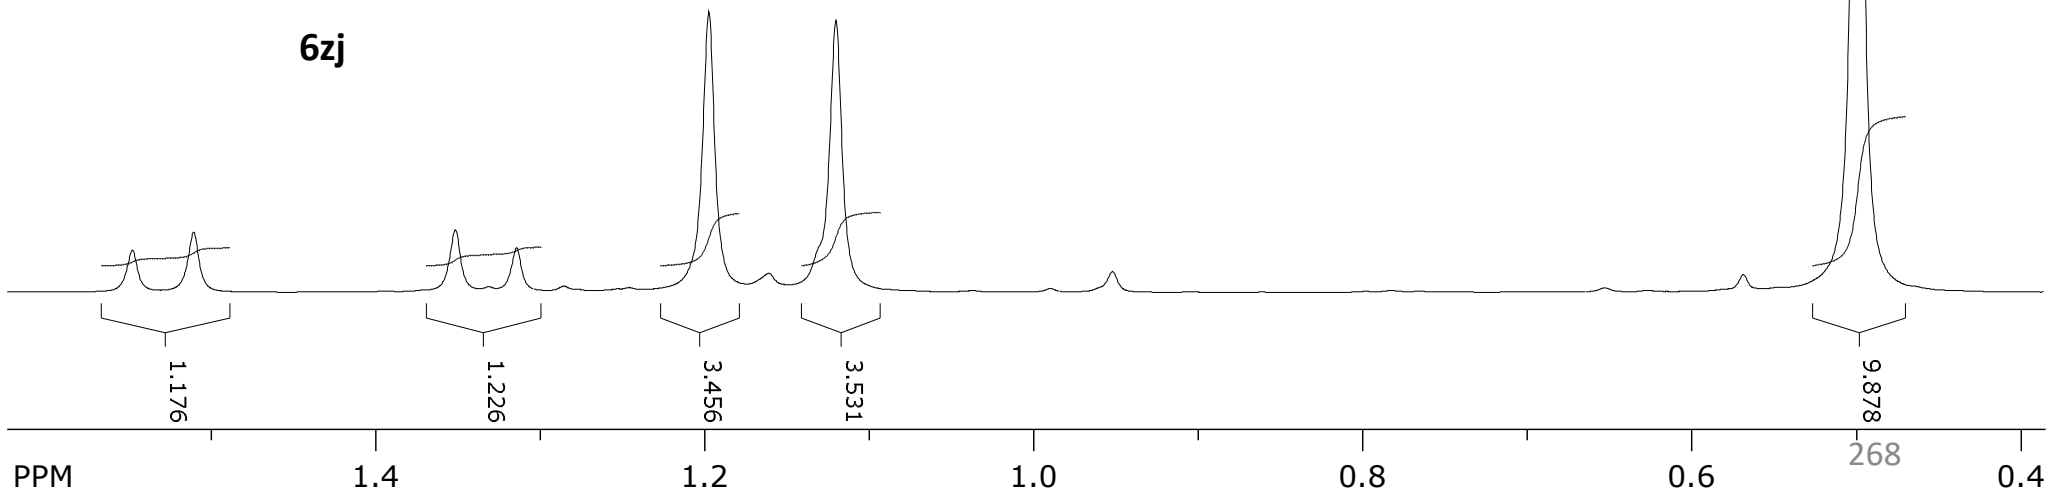

SpinWorks 4: AD-2259

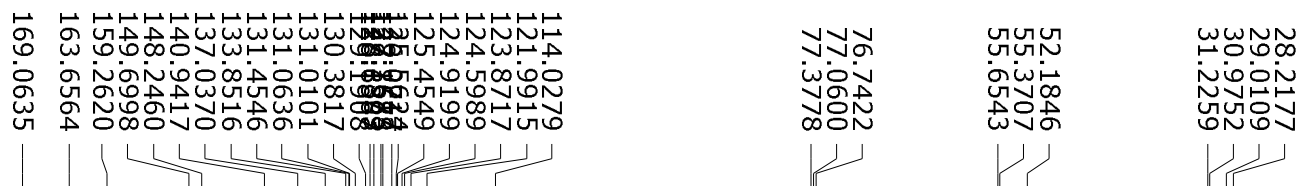

6zj

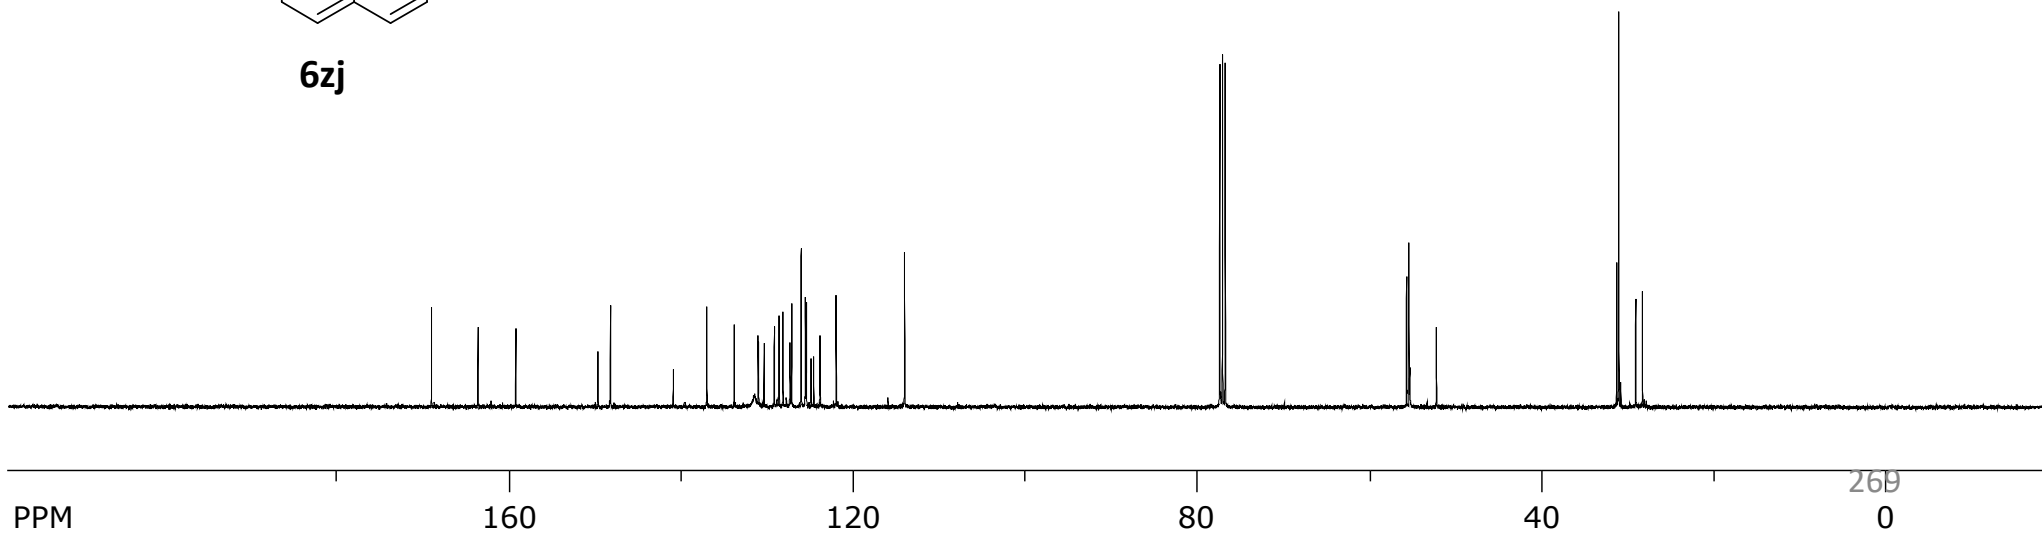

SpinWorks 4: AD-2259

169.0635

163.6564

159.2620

149.6998

148.2460

140.9417

137.0370

133.8516

131.4546

131.0636

130.3817

129.1908

128.6387

128.1803

127.3588

127.1673

126.0717

125.5624

125.4549

124.9199

124.5989

123.8717

121.9915

114.0279



6zj

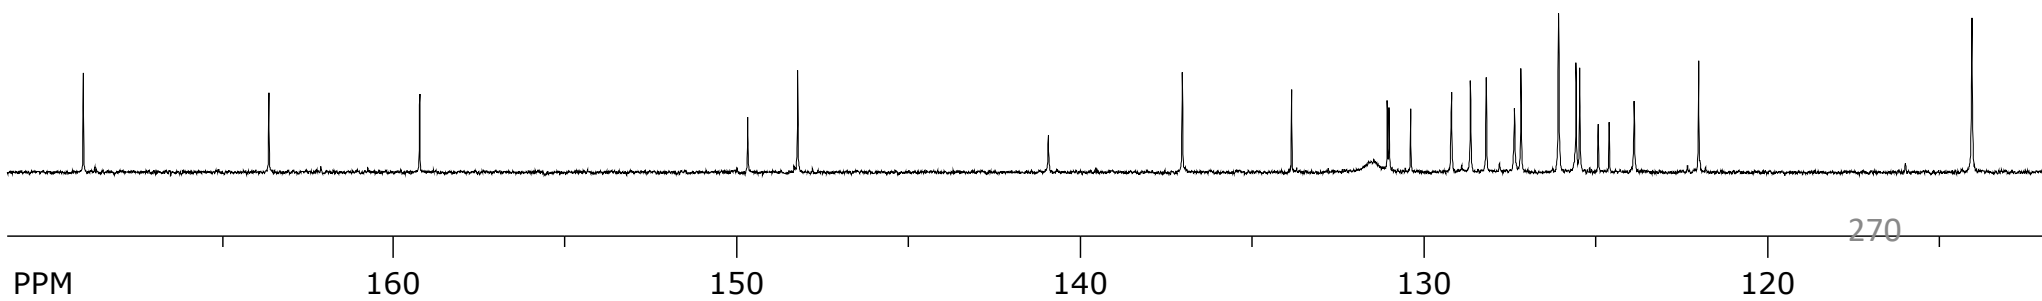

SpinWorks 4: AD-2259

55.371  
55.654

52.185

30.975  
31.226

28.218  
29.011

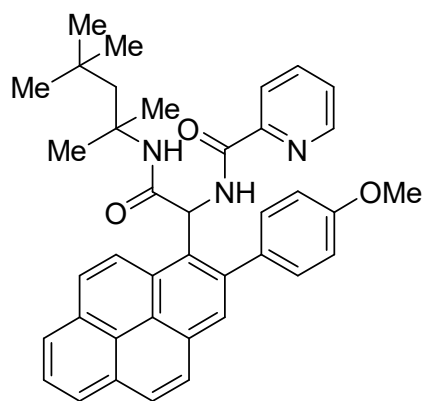

**6zj**

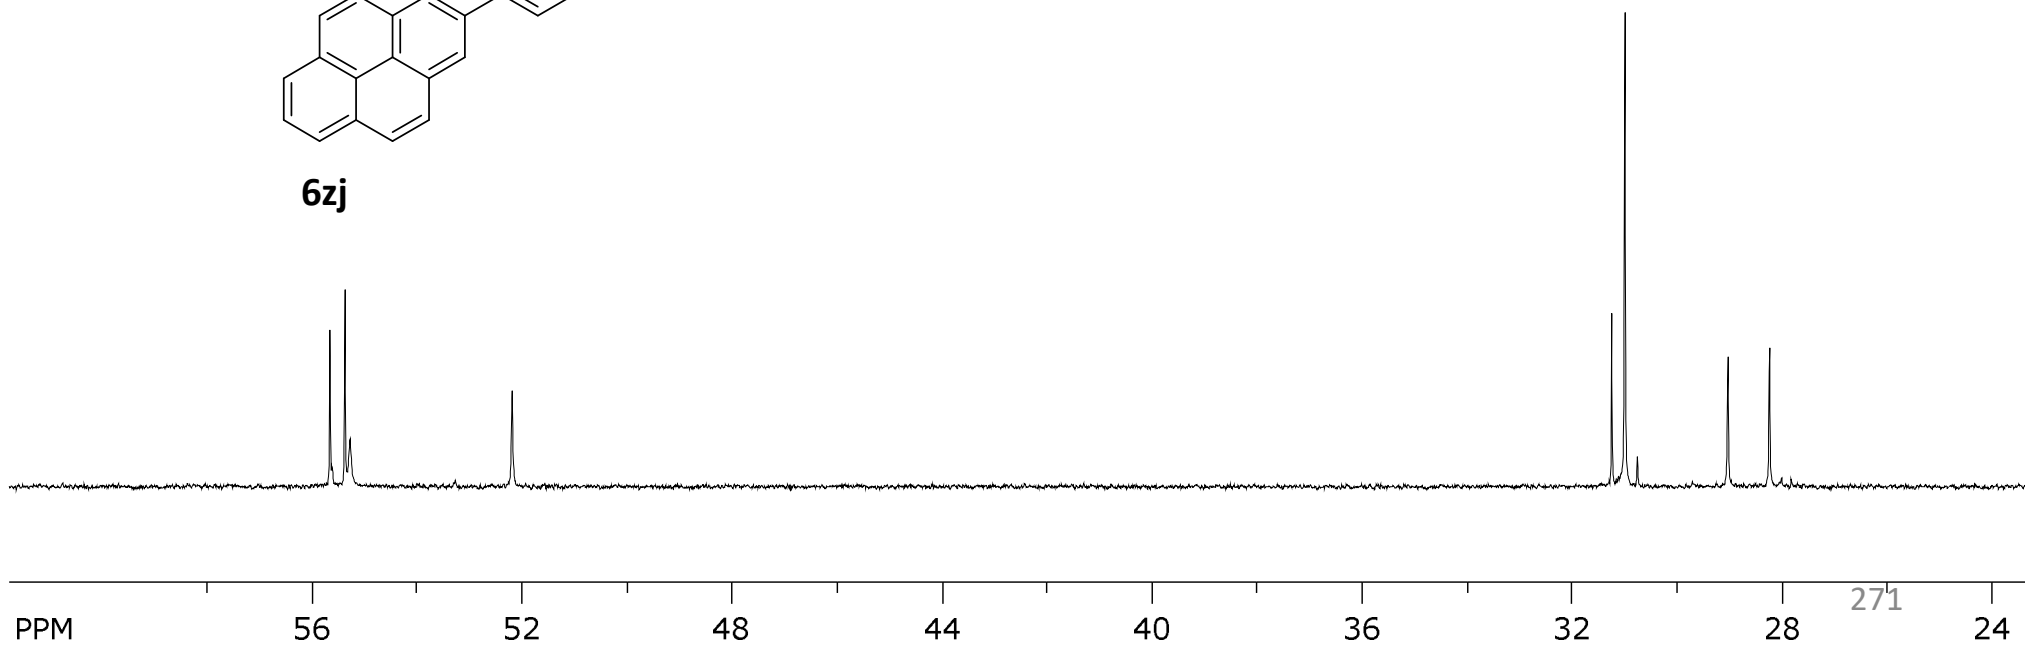

SpinWorks 4: AD-2274  
PROTON CDCl3 /opt/topspin3.5pl2/nmrdata nmrsu 49

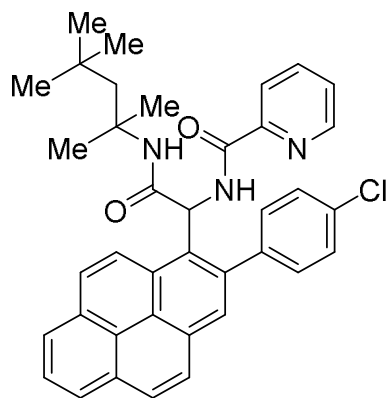

6zk

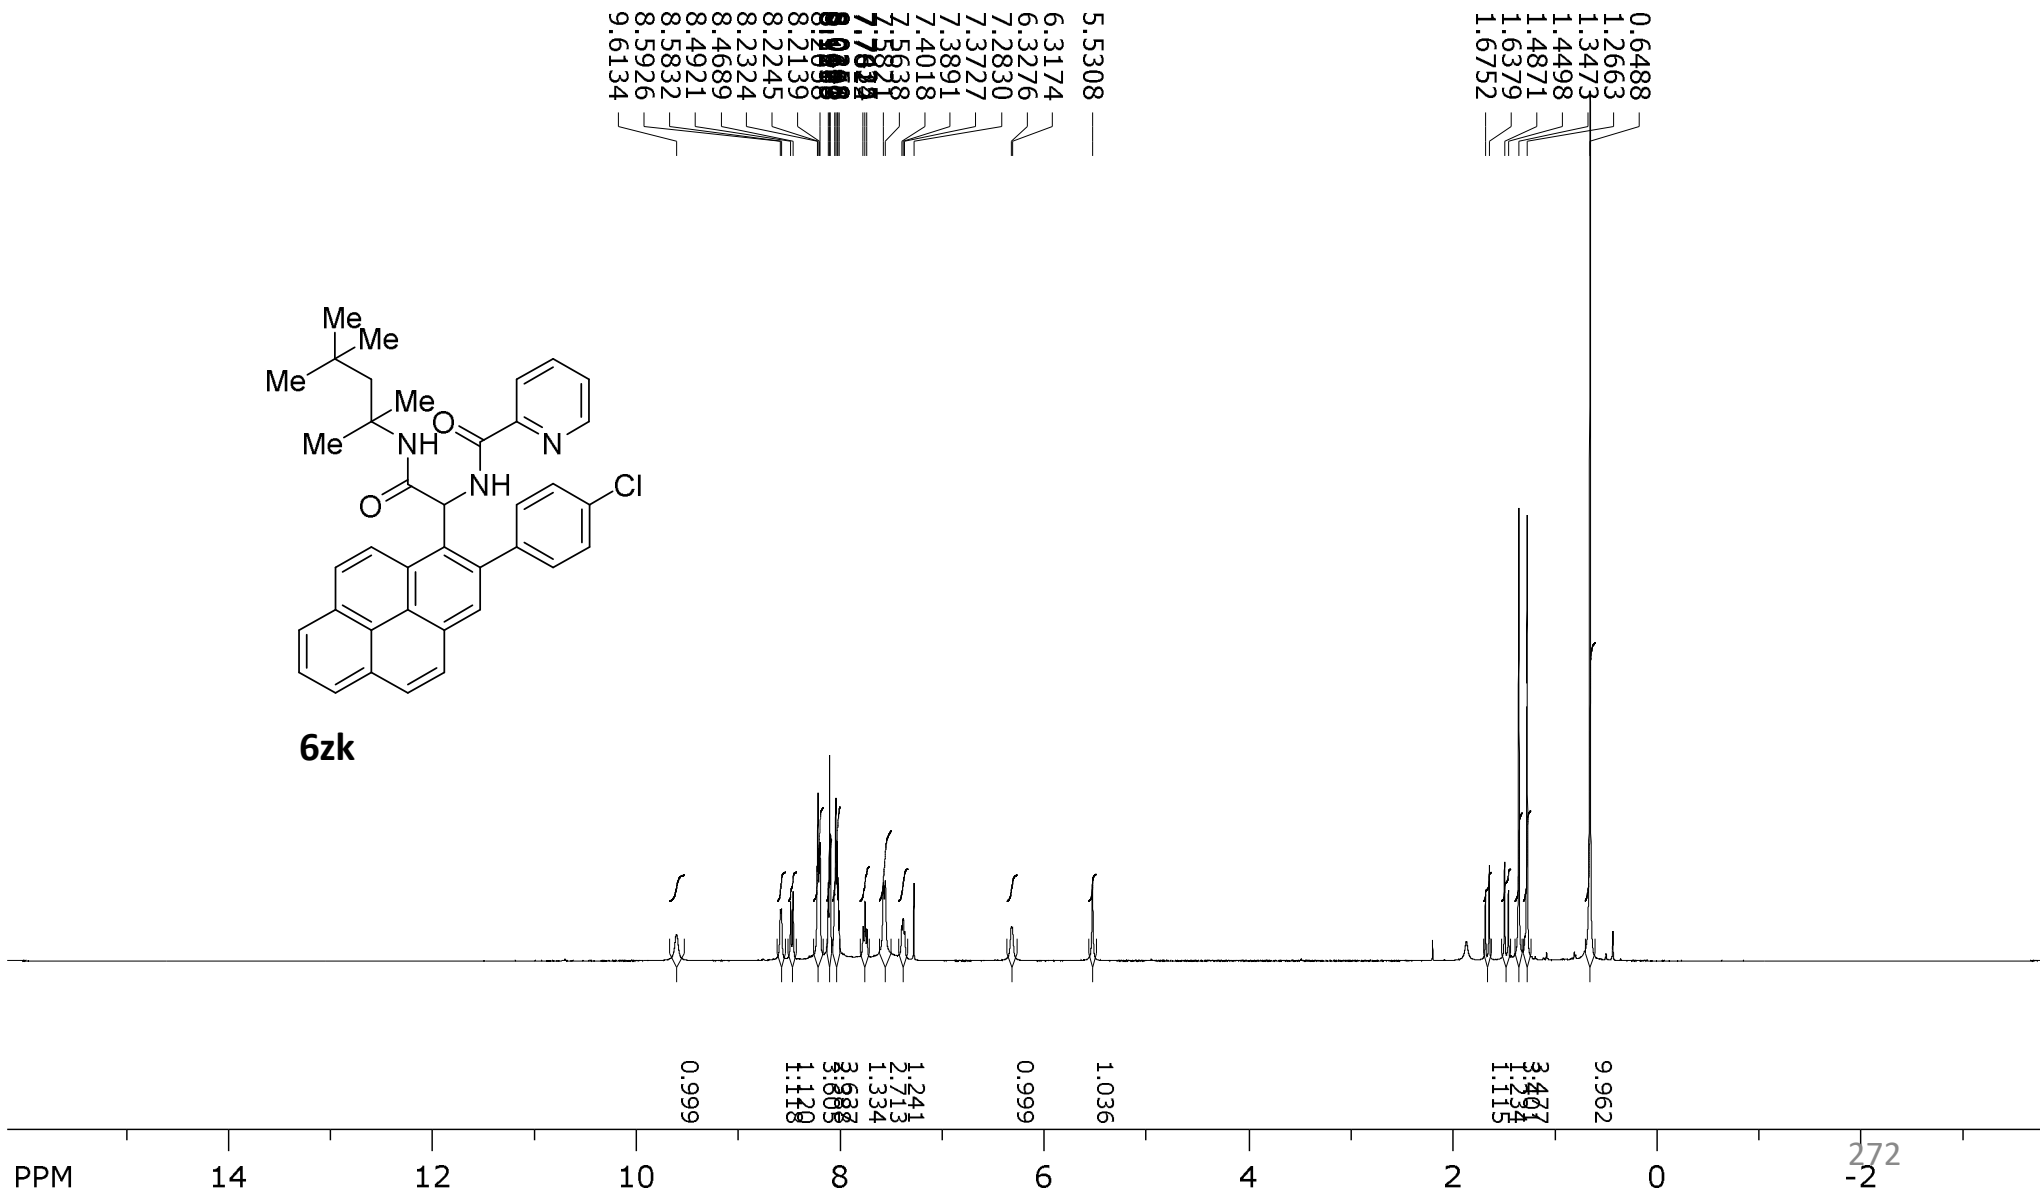



SpinWorks 4: AD-2274  
PROTON CDCl3 /opt/topspin3.5pl2/nmrdata nmrsu 49

9.6134

8.5832  
8.5926

8.4689  
8.4921

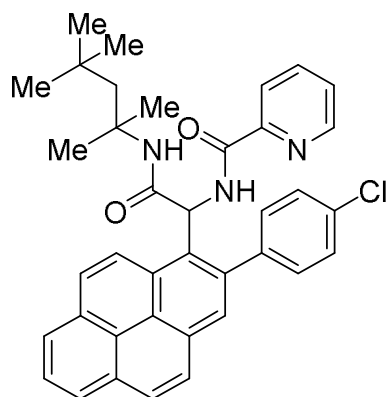

6zk

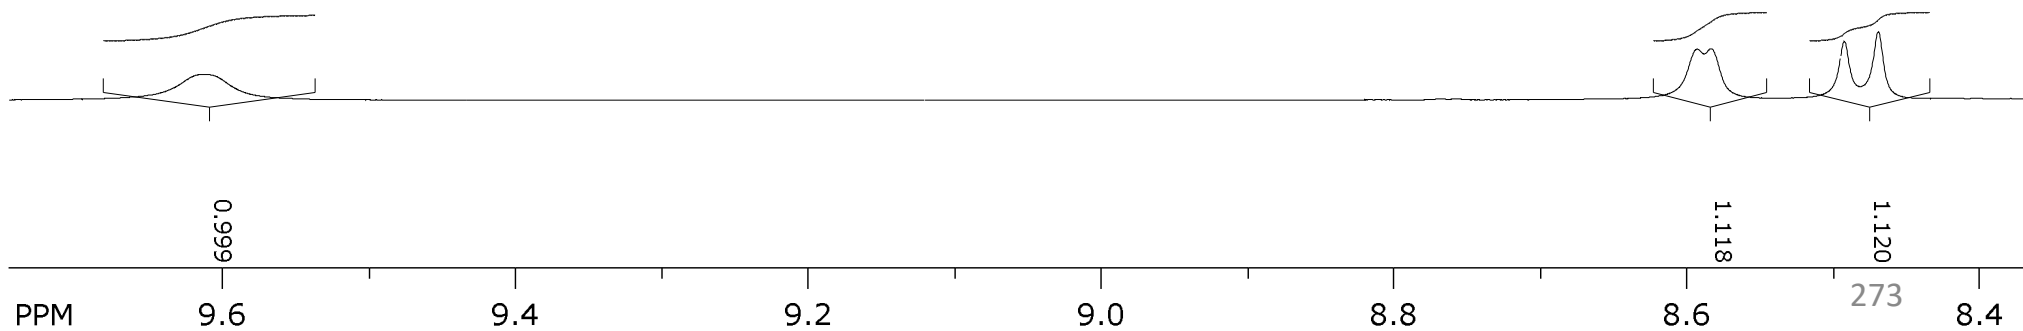

SpinWorks 4: AD-2274  
PROTON CDCl3 /opt/topspin3.5pl2/nmrdata nmrsu 49

8.2058 —  
8.2139 —  
8.2245 —  
8.2324 —  
  
8.1233 —  
8.1106 —  
8.1013 —  
  
8.0621 —  
8.0490 —  
8.0348 —  
8.0268 —  
8.0158 —



**6zk**

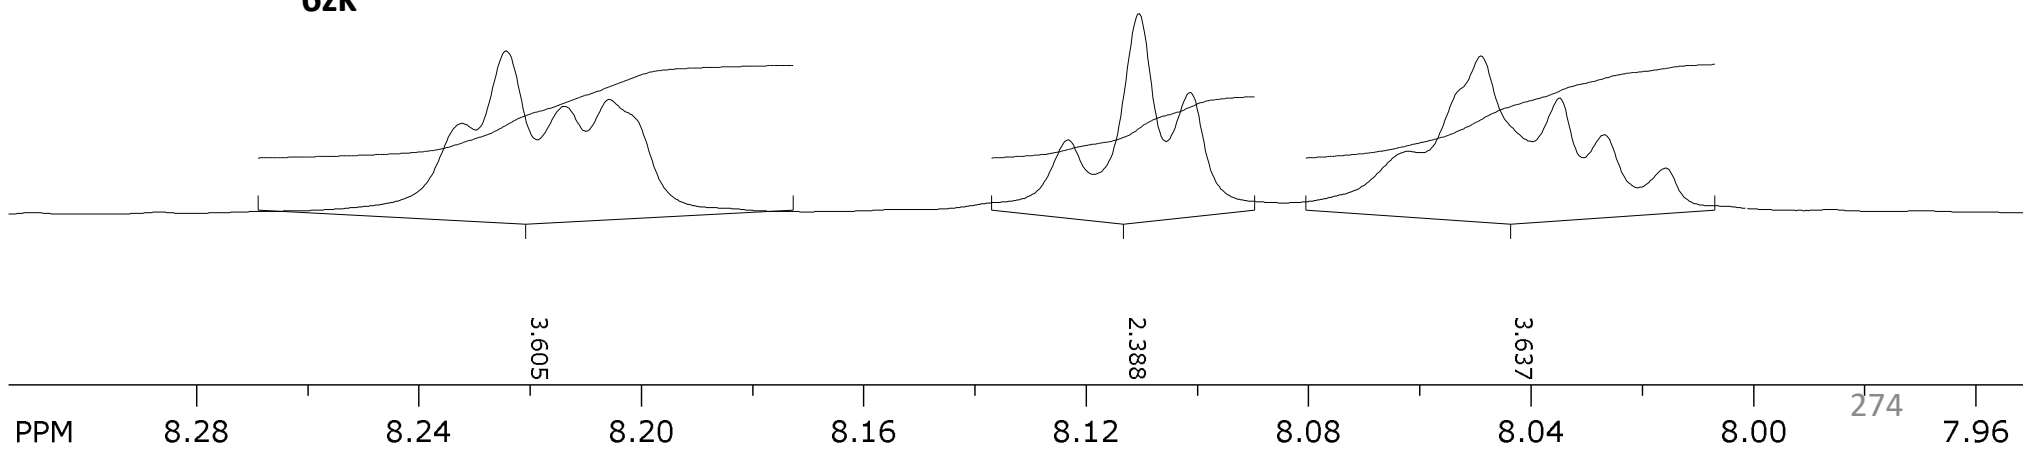

SpinWorks 4: AD-2274  
PROTON CDCl3 /opt/topspin3.5pl2/nmrdata nmrsu 49

7.7435 —  
7.7624 —  
7.7812 —

7.5638 —  
7.5821 —

7.3727 —  
7.3891 —  
7.4018 —

7.2830 —

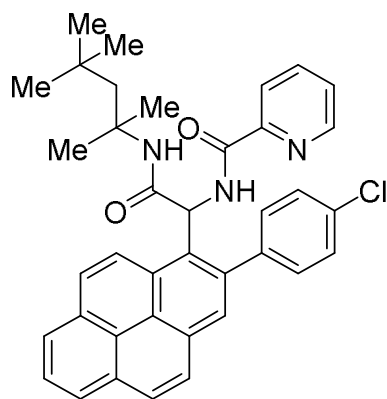

**6zk**

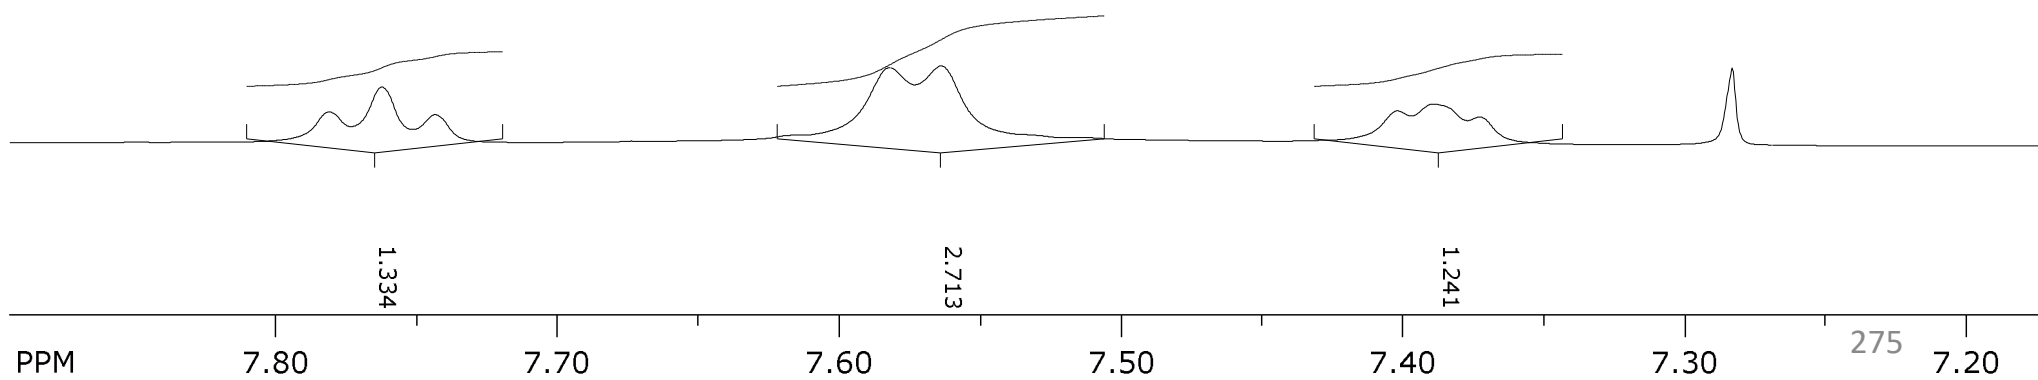

SpinWorks 4: AD-2274  
PROTON CDCl3 /opt/topspin3.5pl2/nmrdata nmrsu 49

6.3174  
6.3276

5.5308

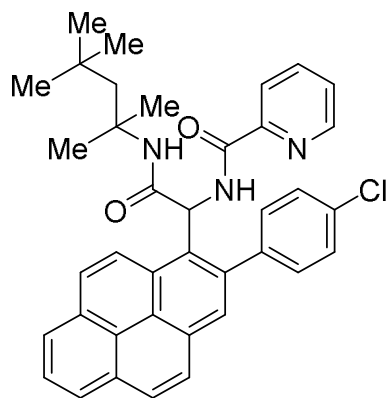

**6zk**

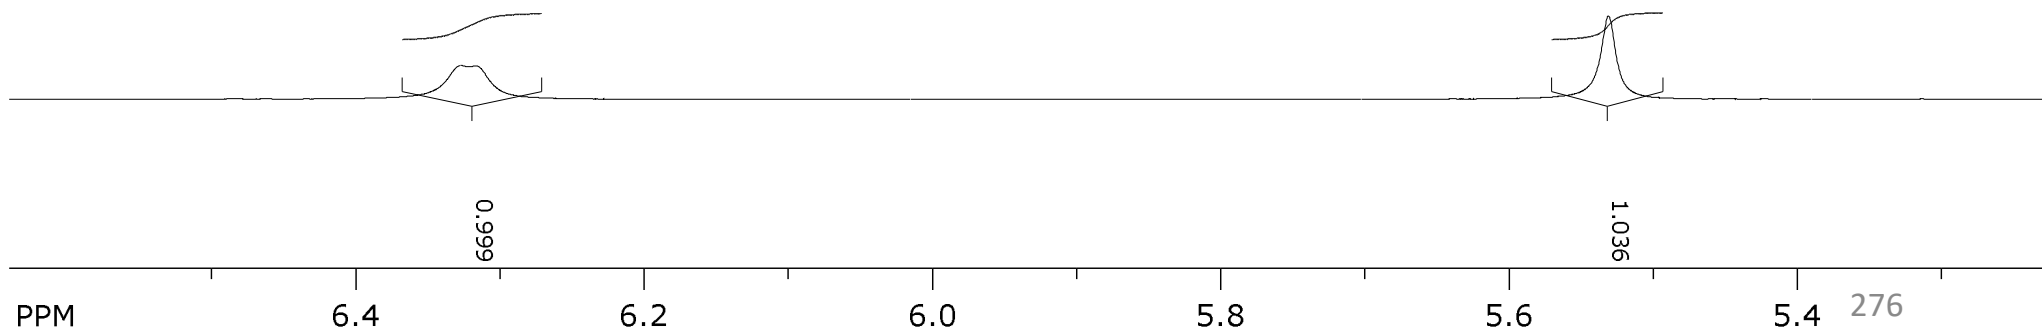

SpinWorks 4: AD-2274  
PROTON CDCl3 /opt/topspin3.5pl2/nmrdata nmrsu 49

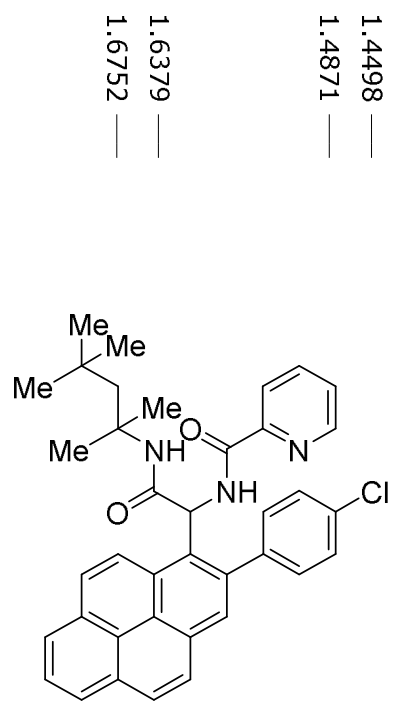

6zk

1.6379  
1.6752

1.4498  
1.4871

1.3473

1.2663

0.6488

1.115

1.234

3.401

3.477

9.962

PPM 1.8 1.6 1.4 1.2 1.0 0.8 0.6 0.4 0.2

277

SpinWorks 4: AD-2274  
C13CPD256 CDCl3 /opt/topspin3.5pl2/nmrdata nmrsu 49

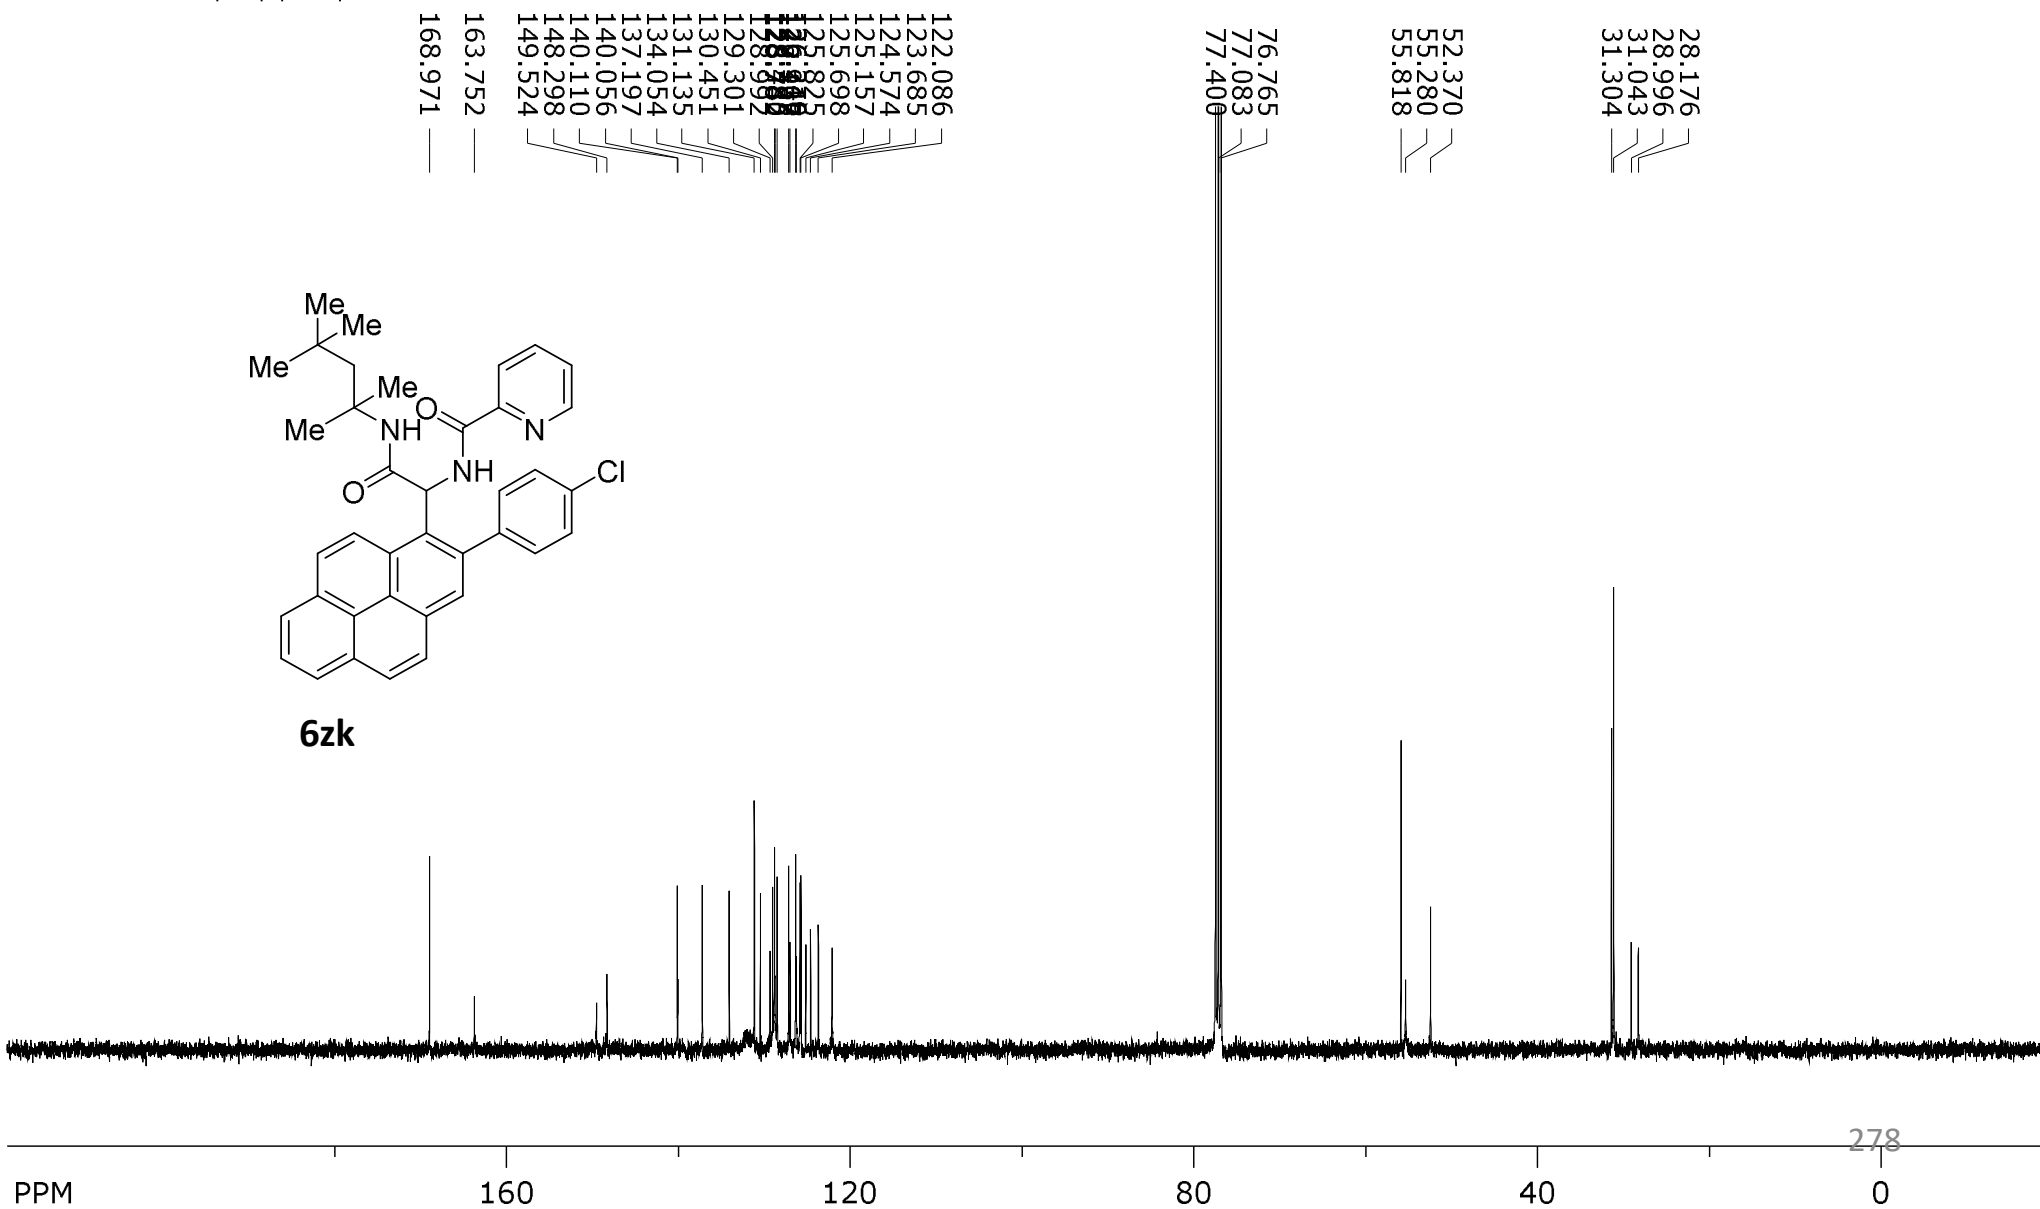

SpinWorks 4: AD-2274  
C13CPD256 CDCl3 /opt/topspin3.5pl2/nmrdata nmrsu 49

168.971 —  
163.752 —  
149.524 —  
148.298 —  
140.110 —  
140.056 —  
137.197 —  
134.054 —  
131.135 —  
130.451 —  
129.301 —  
128.992 —  
128.782 —  
128.740 —  
128.485 —  
127.135 —  
126.967 —  
126.316 —  
126.249 —  
125.825 —  
125.698 —  
125.157 —  
124.574 —  
123.685 —  
122.086 —

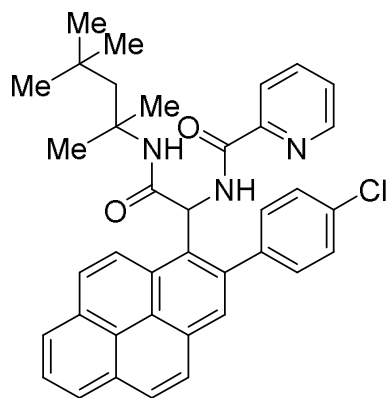

6zk

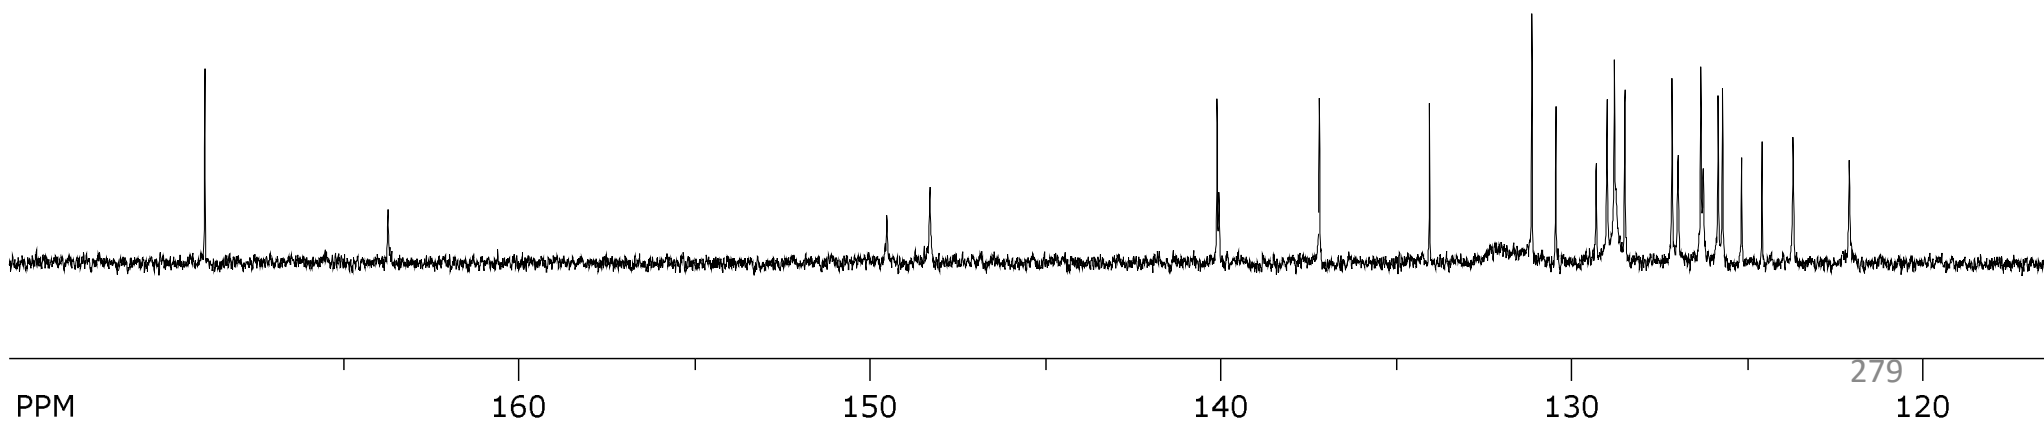

SpinWorks 4: AD-2274  
C13CPD256 CDCl3 /opt/topspin3.5pl2/nmrdata nmrsu 49

55.280  
55.818

52.370

31.043  
31.304

28.176  
28.996



6zk

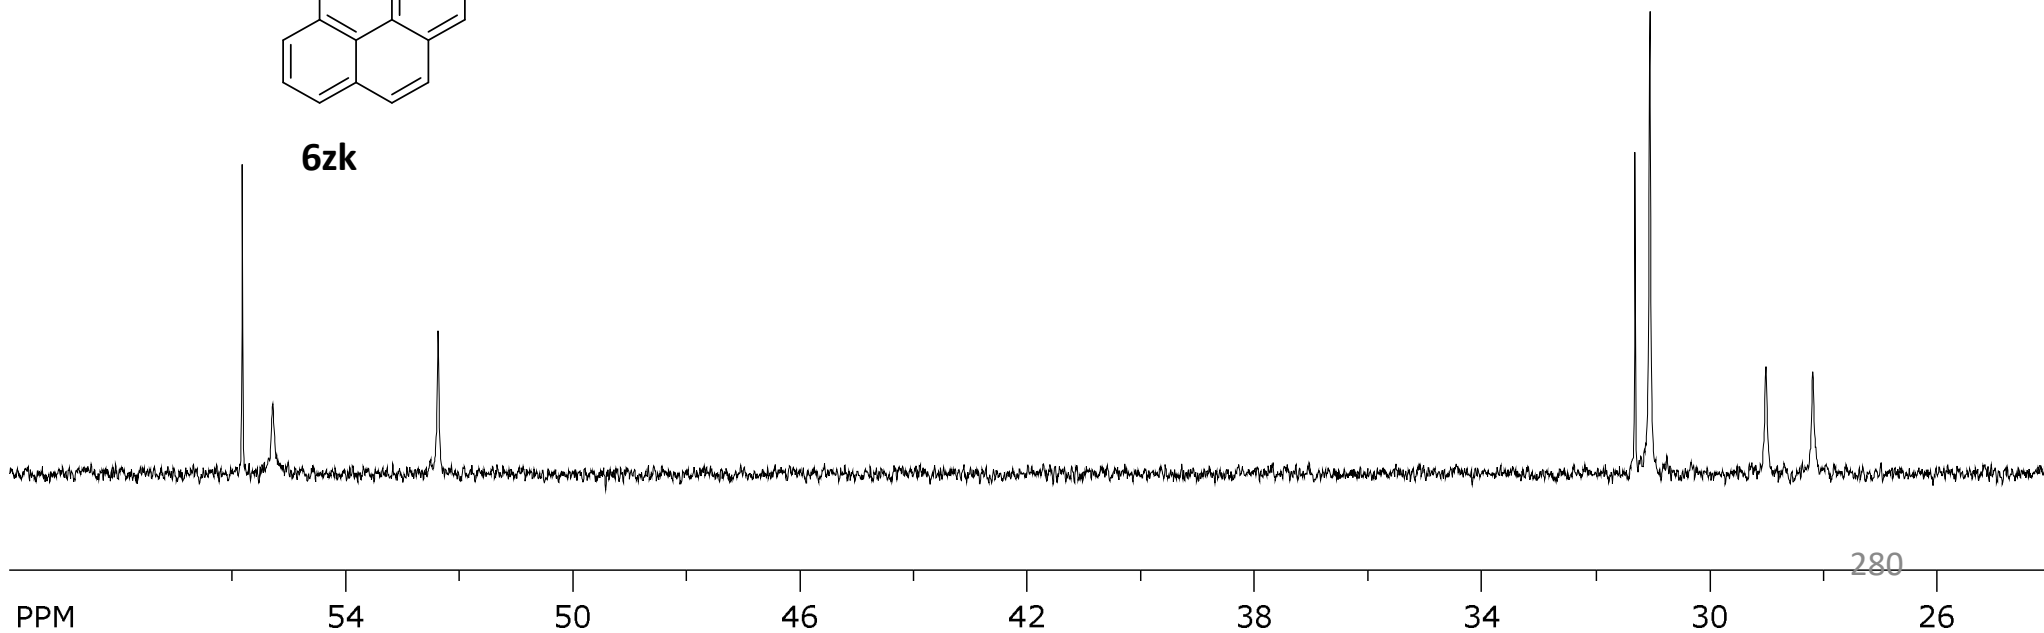



SpinWorks 4: AD-2275  
PROTON CDCl3 /opt/topspin3.5pl2/nmrdata nmrsu 50

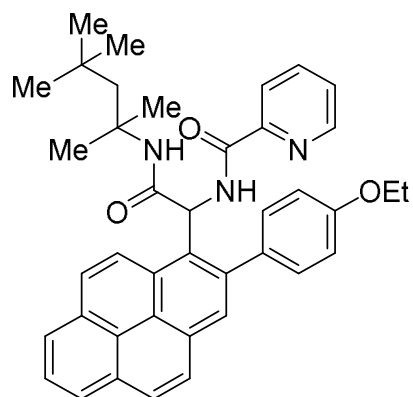

6zl

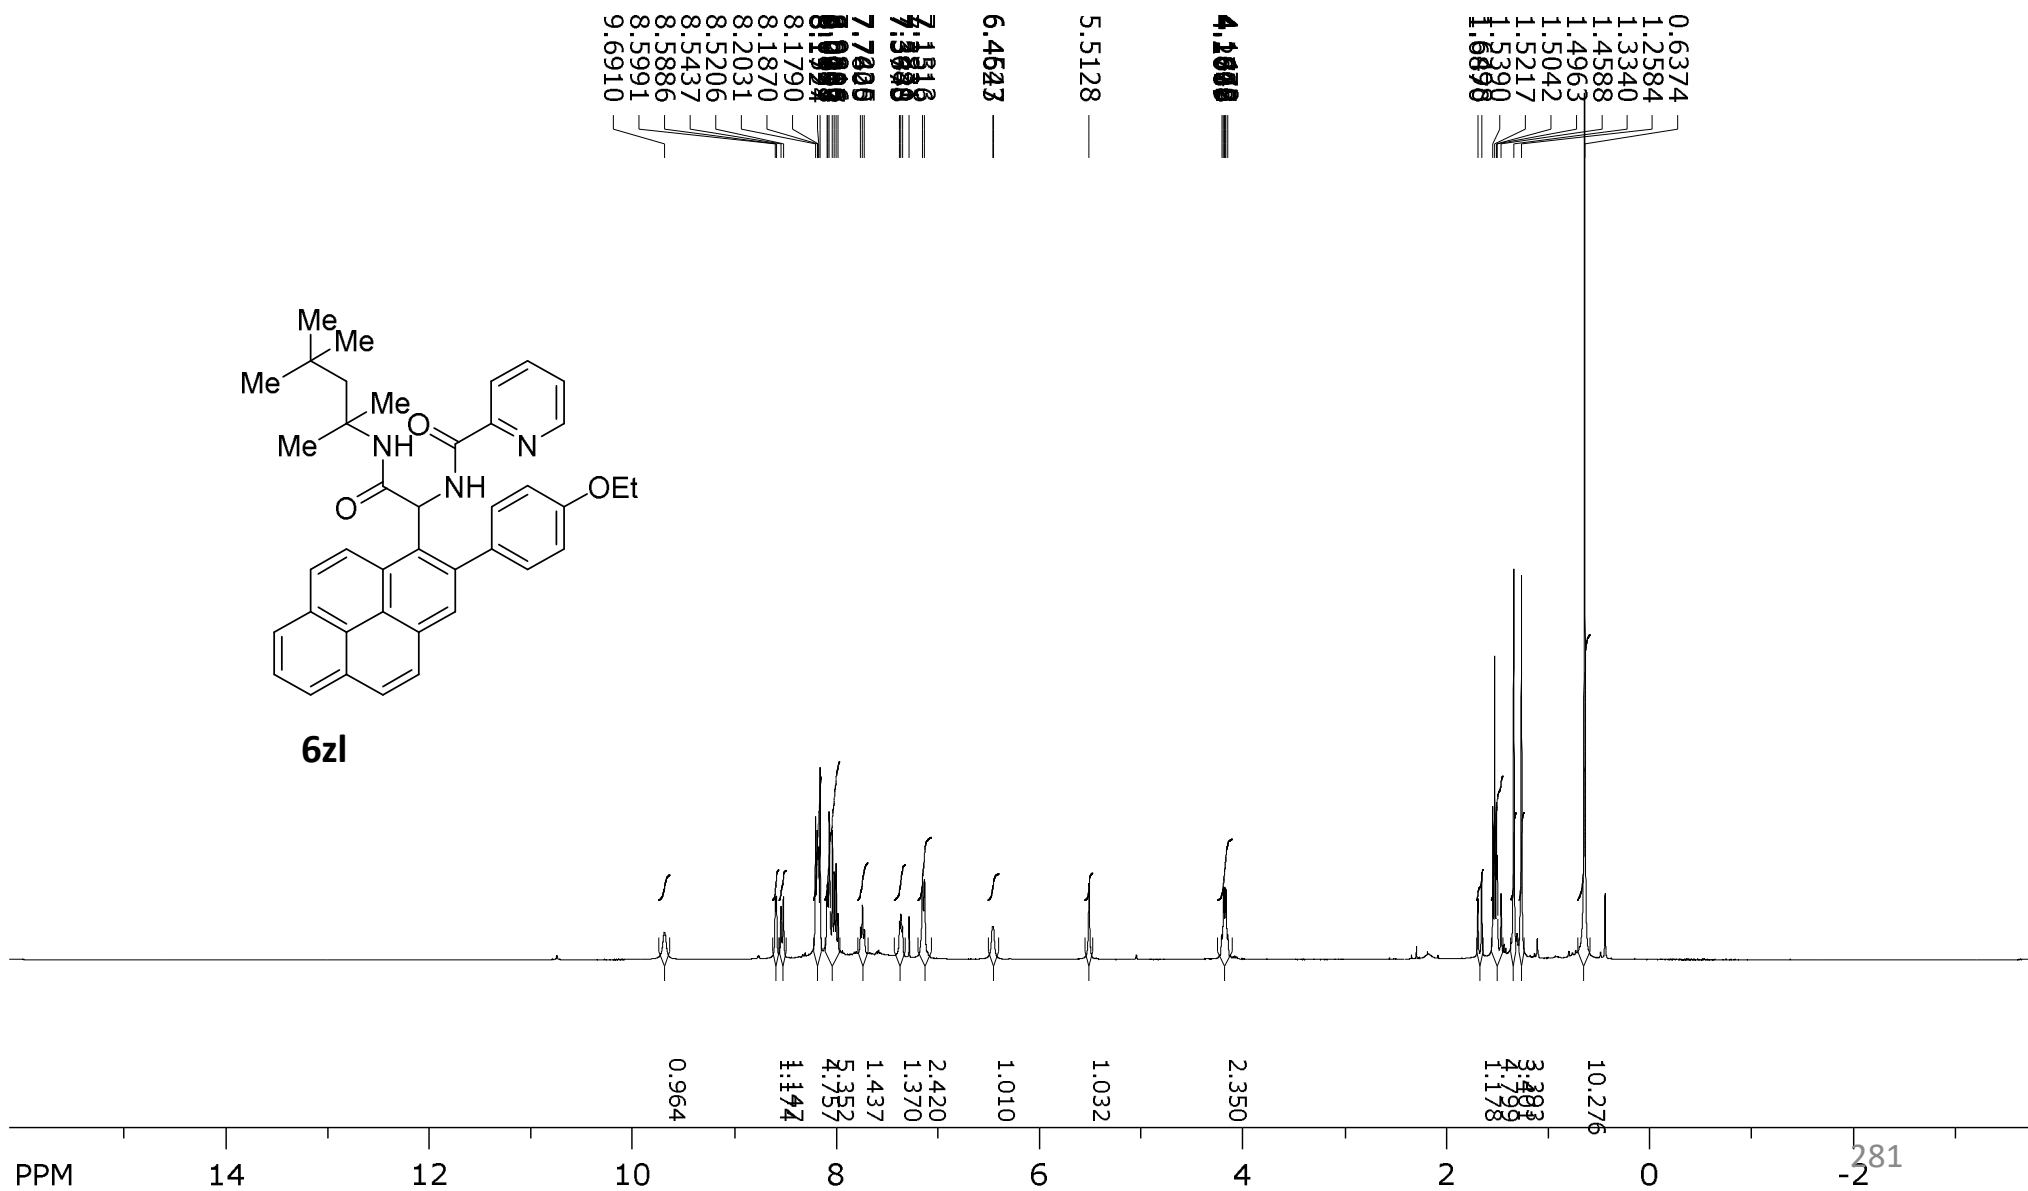

SpinWorks 4: AD-2275  
PROTON CDCl3 /opt/topspin3.5pl2/nmrdata nmrsu 50

9.6910

8.5206  
8.5437  
8.5886  
8.5991

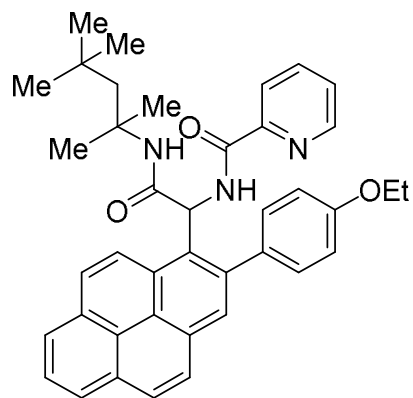

**6zl**

0.964

1.174

1.147

282

PPM 9.8 9.6 9.4 9.2 9.0 8.8 8.6 8.4

SpinWorks 4: AD-2275  
PROTON CDCl3 /opt/topspin3.5pl2/nmrdata nmrsu 50

8.1597  
8.1724  
8.1790  
8.1870  
8.2031

8.0693  
8.0828  
8.0917

8.0380  
8.0187  
8.0006  
7.9816

7.7235  
7.7420  
7.7605



**6zl**

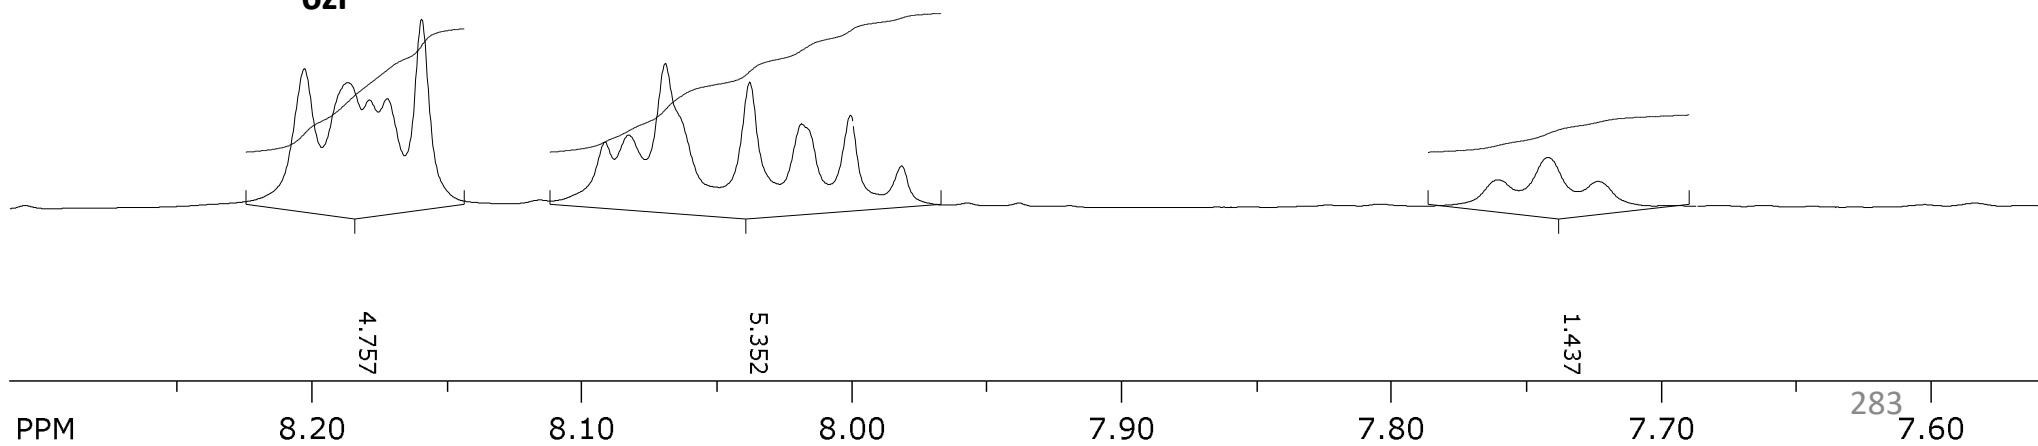

SpinWorks 4: AD-2275  
PROTON CDCl3 /opt/topspin3.5pl2/nmrdata nmrsu 50

7.3480  
7.3648  
7.3773

7.2831

7.1313  
7.1516

6.4547  
6.4623

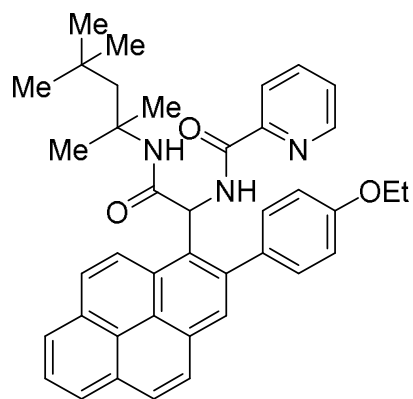

**6zl**

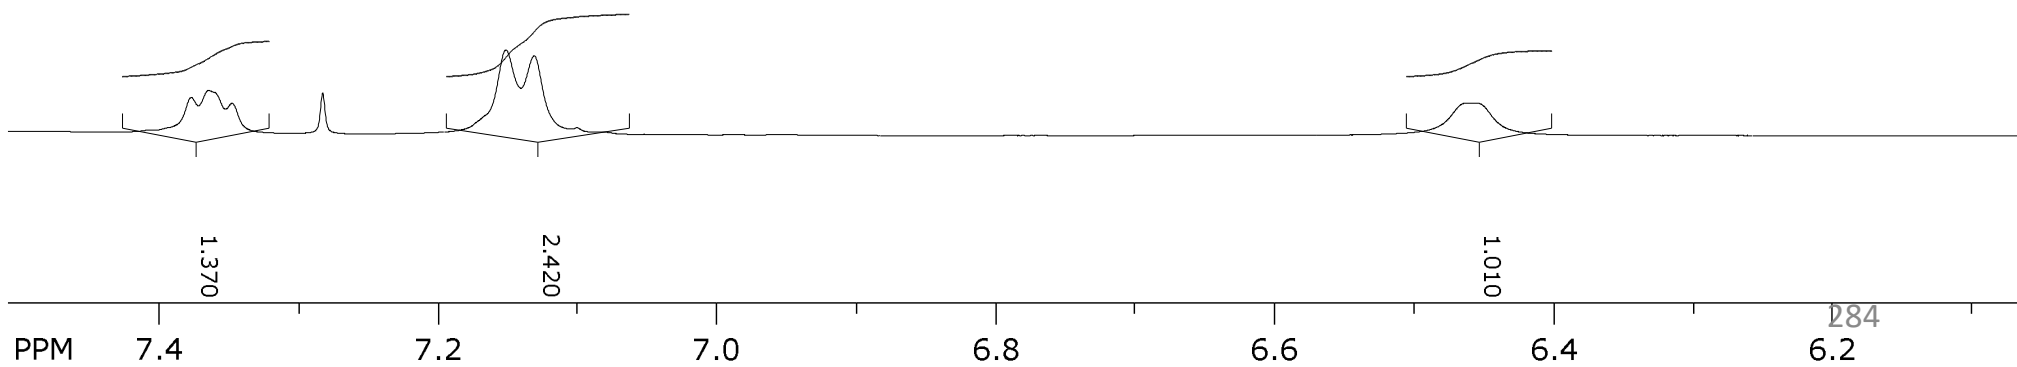

SpinWorks 4: AD-2275  
PROTON CDCl3 /opt/topspin3.5pl2/nmrdata nmrsu 50

5.5128

4.1472  
4.1645  
4.1722  
4.1818  
4.1895  
4.2069



**6zl**

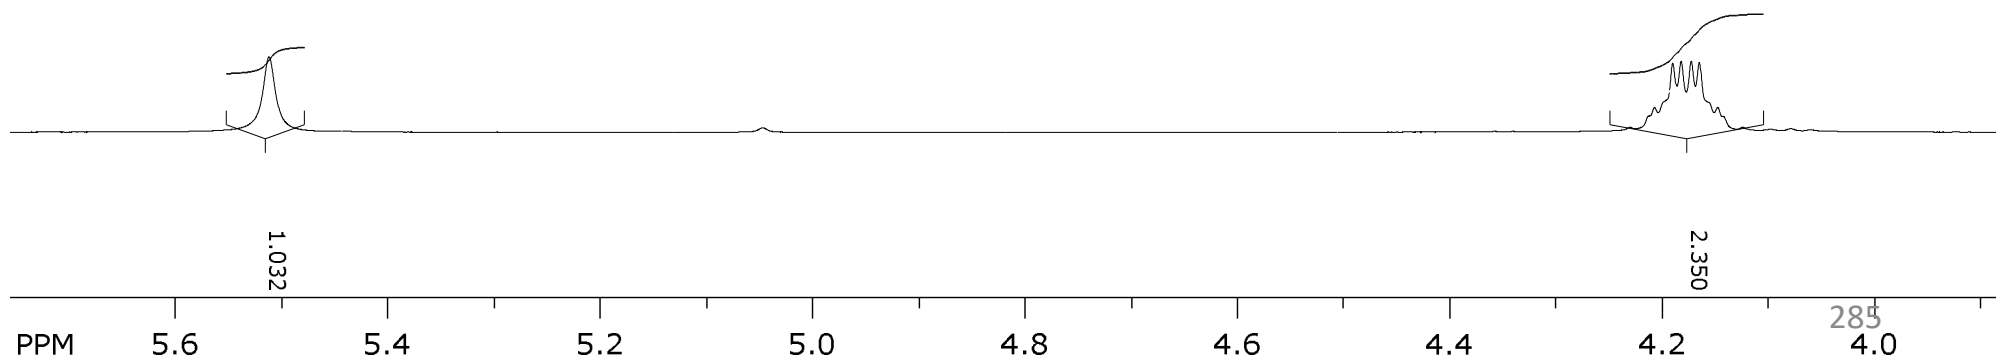

SpinWorks 4: AD-2275  
PROTON CDCl3 /opt/topspin3.5pl2/nmrdata nmrsu 50

1.6870  
1.6498  
1.5390  
1.5217  
1.5042  
1.4963  
1.4588

1.3340  
1.2584

0.6374

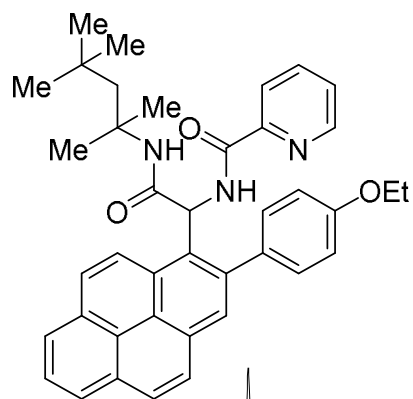

6zl

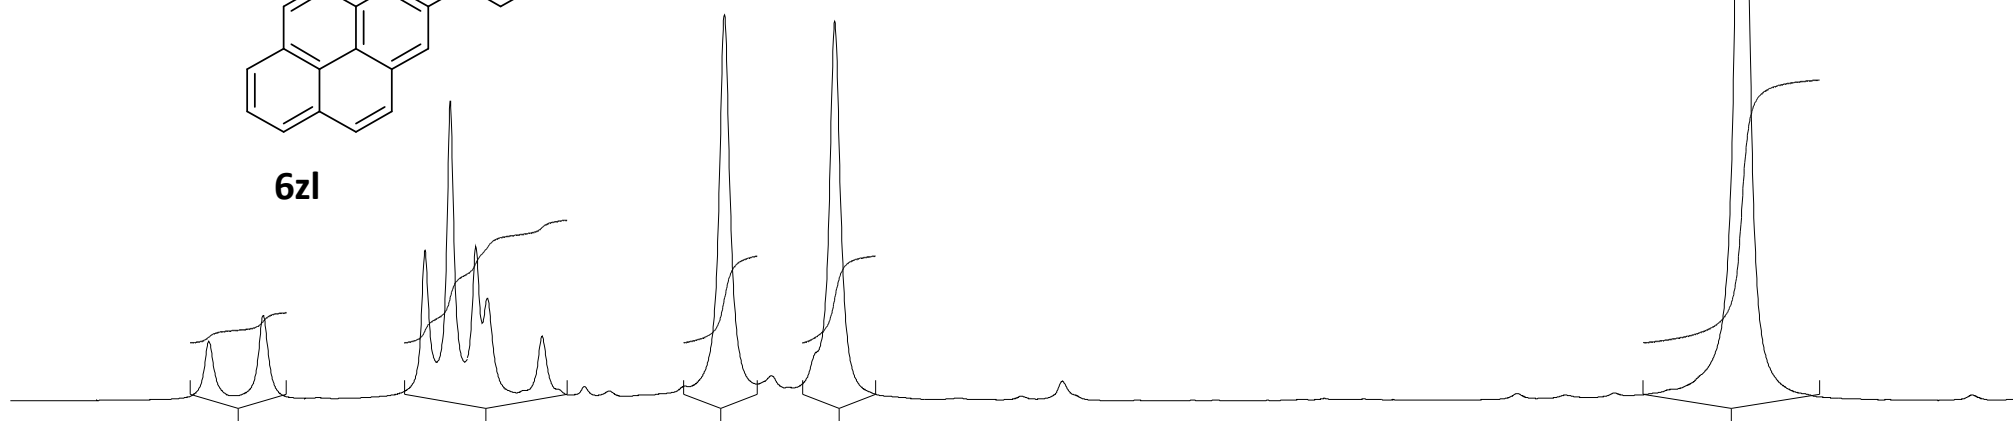

1.178

4.799

3.401

3.393

10.276

286

PPM

1.6

1.4

1.2

1.0

0.8

0.6

SpinWorks 4: AD-2275  
C13CPD256 CDCl3 /opt/topspin3.5pl2/nmrdata nmrsu 50

114.522  
121.988  
123.877  
124.572  
124.879  
125.427  
130.985  
130.985  
130.985  
130.985  
131.031  
131.404  
131.512  
133.648  
137.066  
140.981  
148.203  
149.645  
158.616  
163.593  
169.040

76.742  
77.060  
77.378  
63.499  
52.104  
55.259  
55.627  
28.214  
29.001  
30.958  
31.209  
14.906

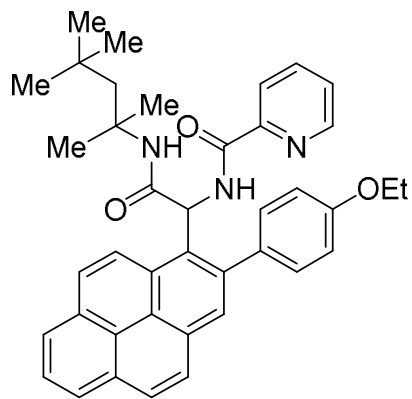

6zl

PPM

160

120

80

40

0<sup>287</sup>

SpinWorks 4: AD-2275  
C13CPD256 CDCl3 /opt/topspin3.5pl2/nmrdata nmrsu 50

169.040 —  
163.593 —  
158.616 —  
148.203 —  
149.645 —  
140.981 —  
137.066 —  
133.648 —  
131.512 —  
131.404 —  
130.985 —  
130.352 —  
129.165 —  
128.603 —  
128.151 —  
127.357 —  
127.159 —  
126.079 —  
126.043 —  
125.535 —  
125.427 —  
124.879 —  
124.572 —  
123.877 —  
121.988 —  
114.522 —



**6zl**

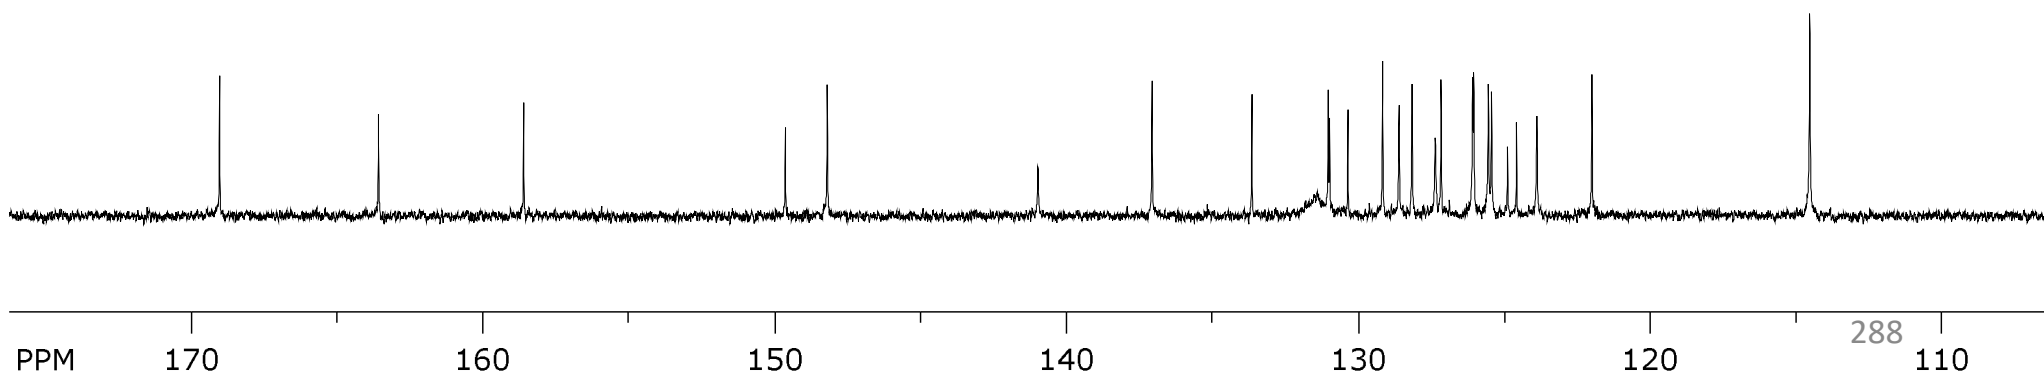



SpinWorks 4: AD-2275  
C13CPD256 CDCl3 /opt/topspin3.5pl2/nmrdata nmrsu 50

63.499

55.259  
55.627

52.104

28.214  
29.001  
30.958  
31.209

14.906



6zl

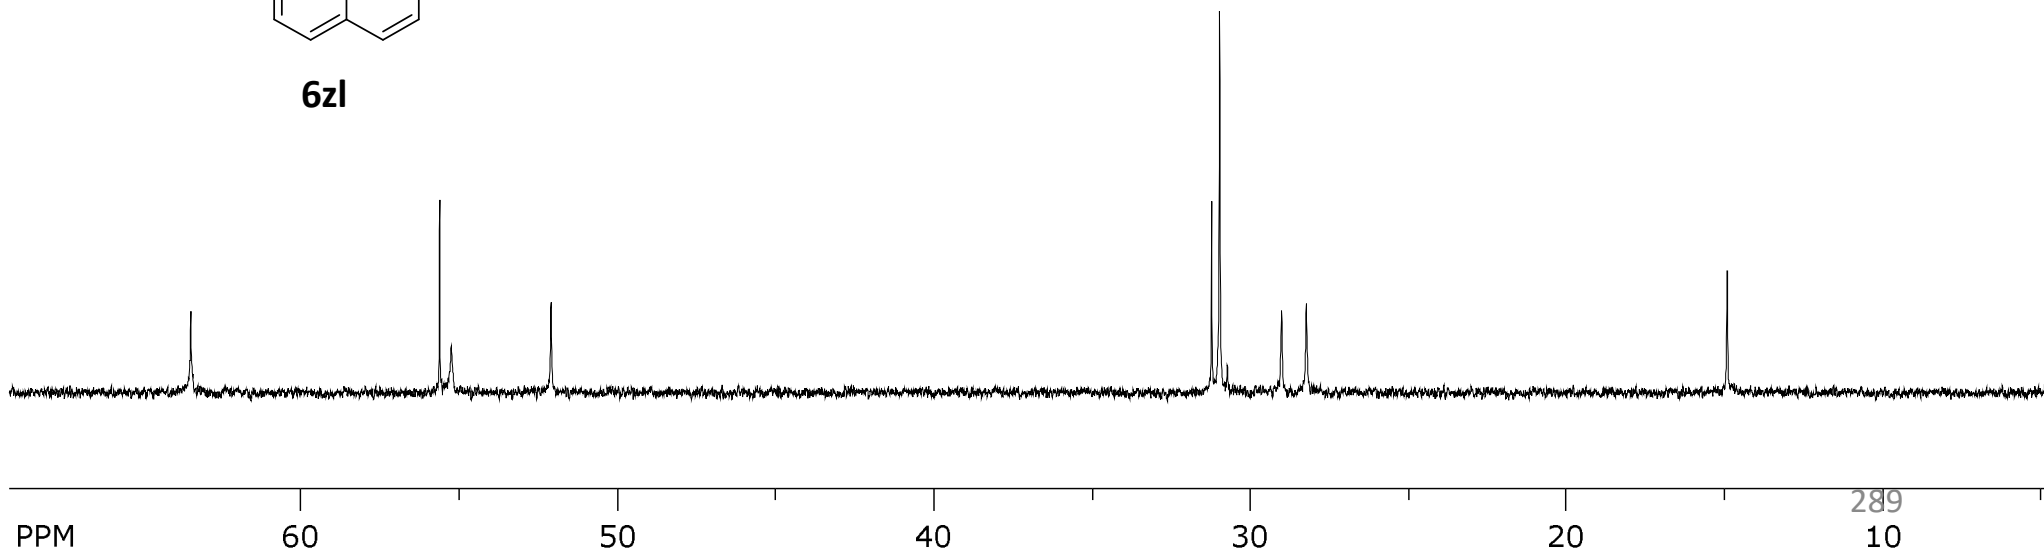

SpinWorks 4: AD 1949  
PROTON CDCl3 /opt/topspin3.5pl2/nmrdata nmrsu 59

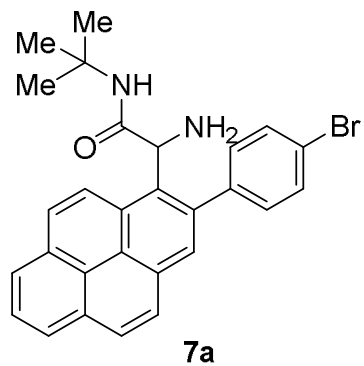

7.2834  
7.4365  
7.6638  
7.6845  
8.0059  
8.0124  
8.0285  
8.0309  
8.0508  
8.0508  
8.0508  
8.1740  
8.1948  
8.2034  
8.2135  
8.2224  
8.2715  
8.2948

5.0442

2.1834

1.4286

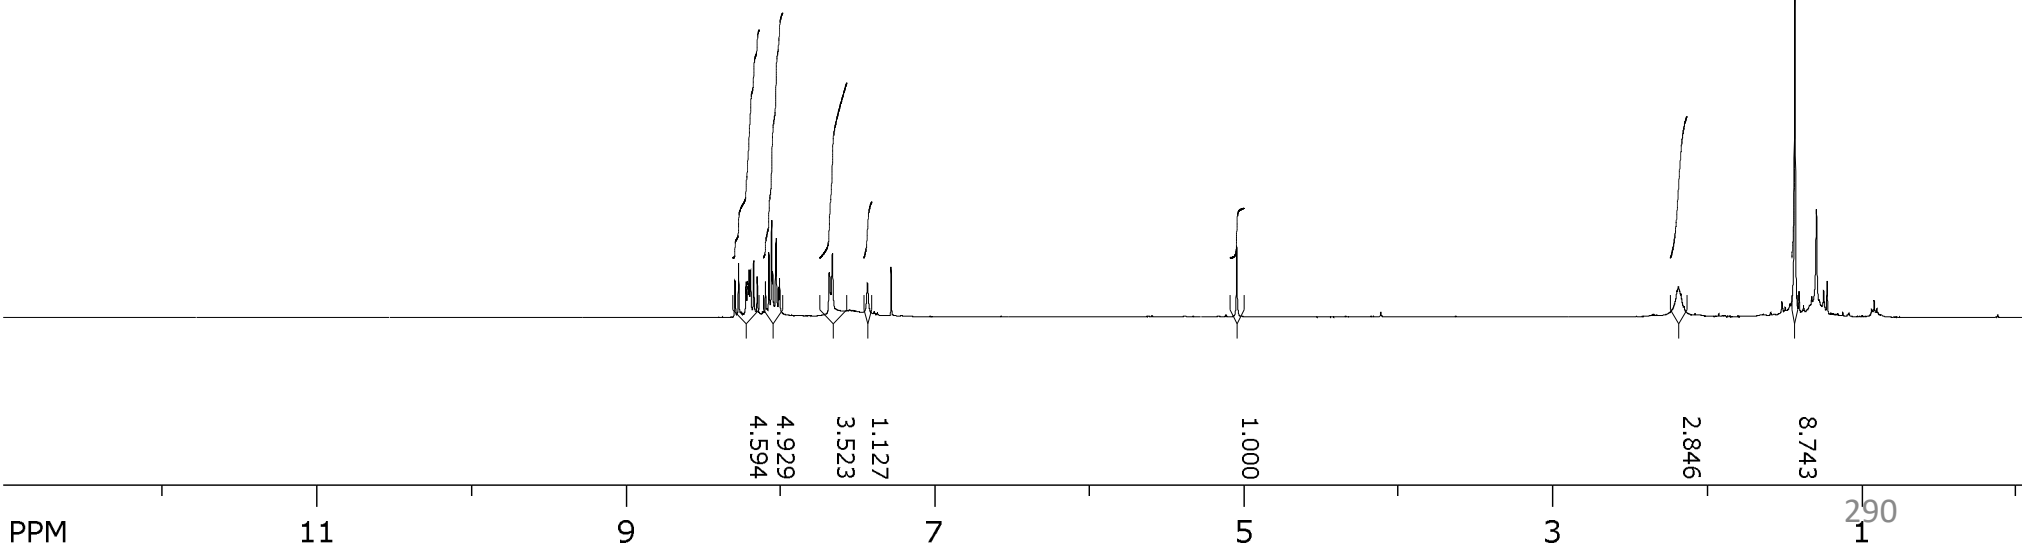

SpinWorks 4: AD 1949  
PROTON CDCl3 /opt/topspin3.5pl2/nmrdata nmrsu 59

8.0059  
8.0124  
8.0285  
8.0309  
8.0507  
8.0575  
8.0753  
8.0976  
8.1506  
8.1740  
8.1948  
8.2034  
8.2135  
8.2224  
8.2715  
8.2948

7.6638  
7.6845

7.4365

7.2834

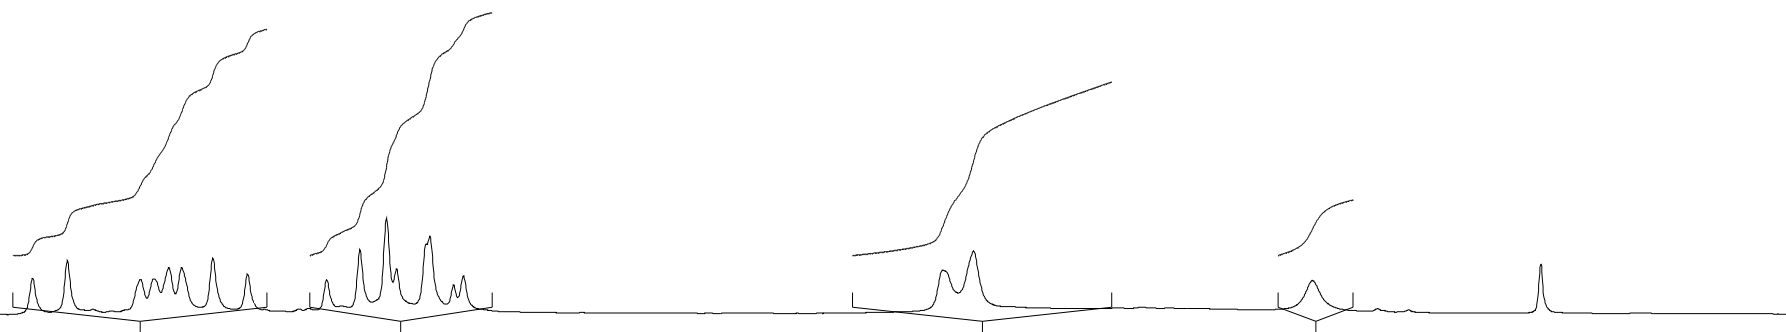

4.594

4.929

3.523

1.127

PPM

8.2

8.0

7.8

7.6

7.4

7.2  
291

SpinWorks 4: AD 1949  
C13CPD256 CDCl3 /opt/topspin3.5pl2/nmrdata nmrsu 36

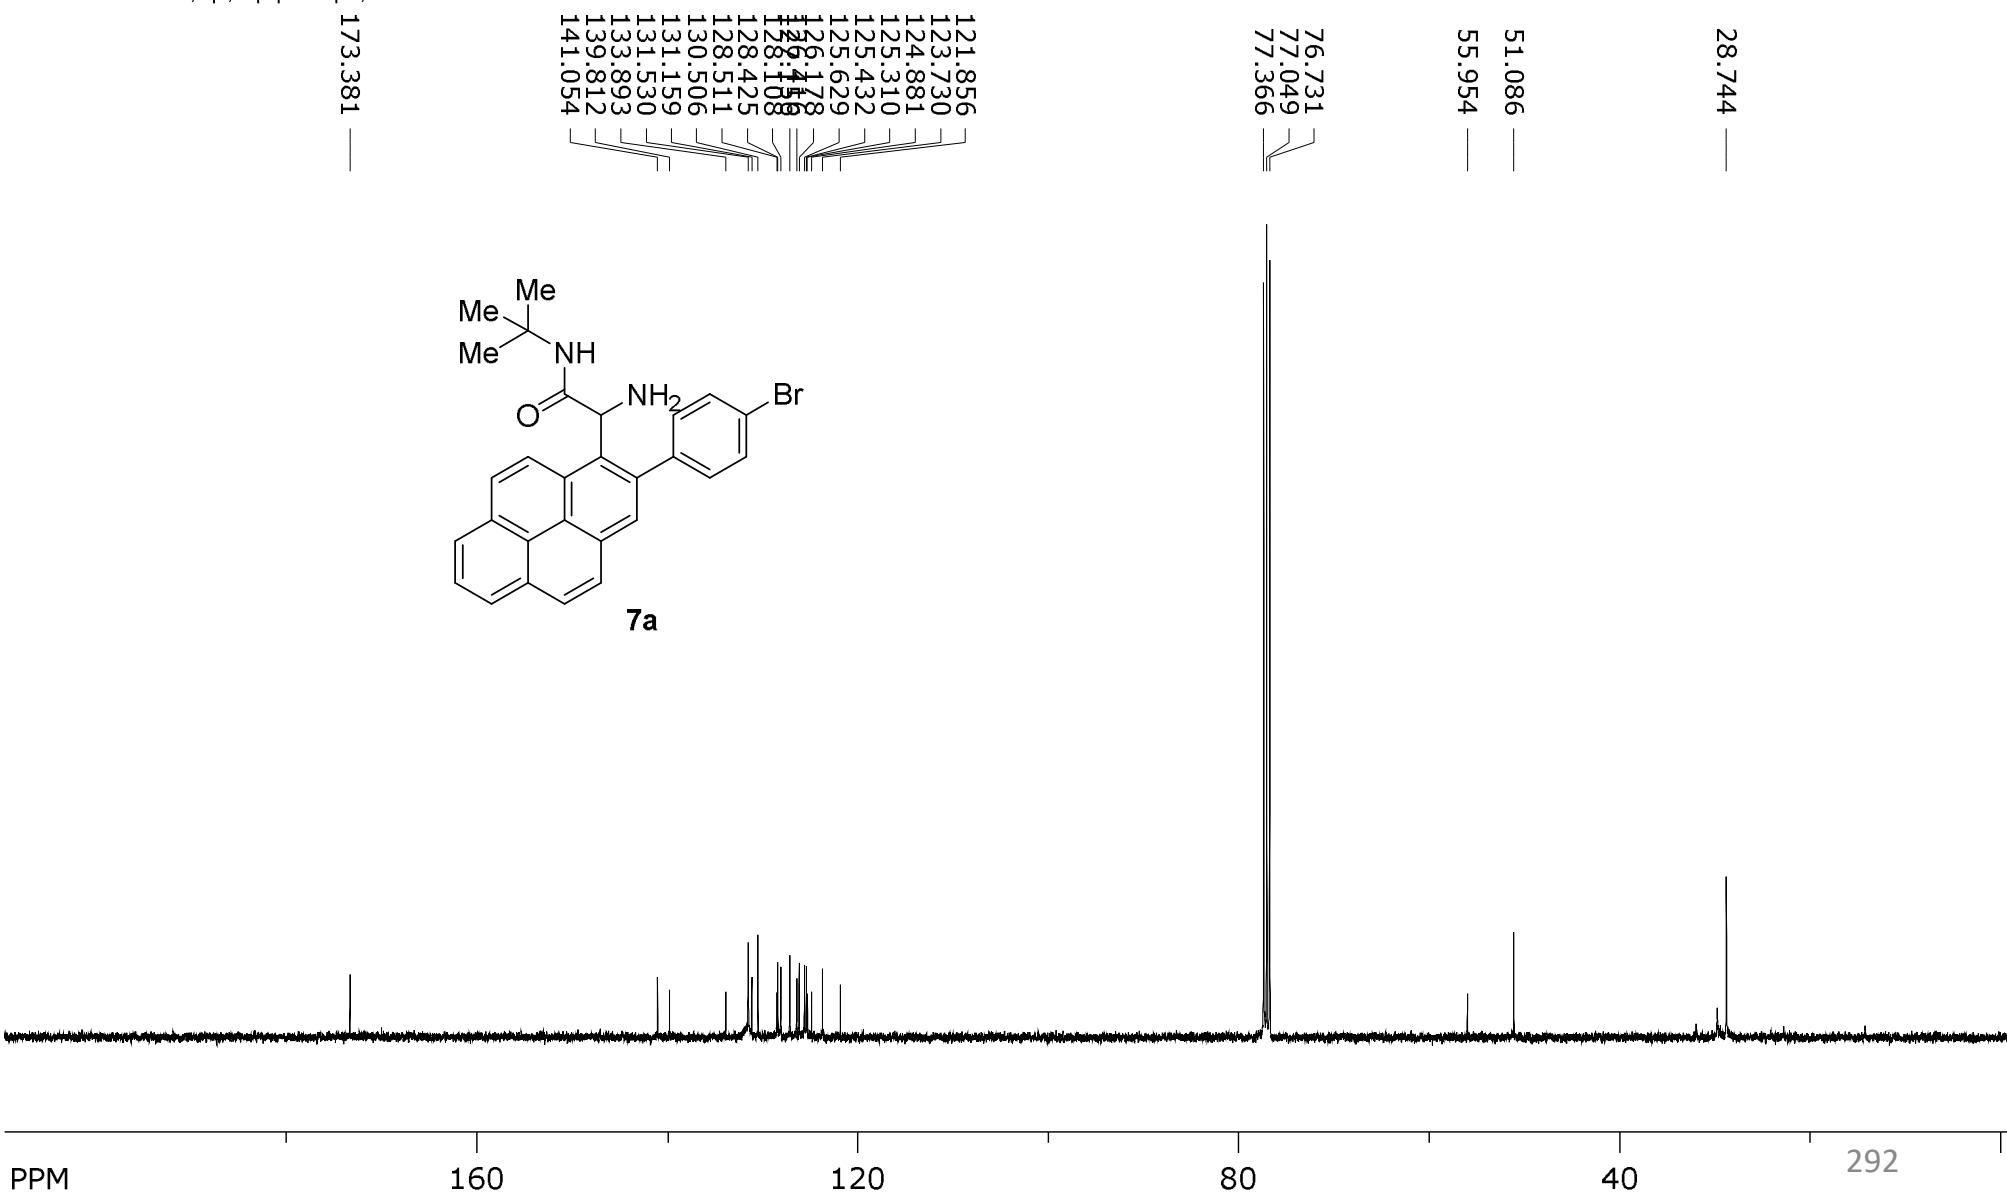

SpinWorks 4: AD 1949  
C13CPD256 CDCl3 /opt/topspin3.5pl2/nmrdata nmrsu 36

141.054 —  
139.812 —  
133.893 —  
131.530 —  
131.159 —  
130.506 —  
128.511 —  
128.425 —  
128.108 —  
127.156 —  
126.416 —  
126.178 —  
125.629 —  
125.432 —  
125.310 —  
124.881 —  
123.730 —  
121.856 —

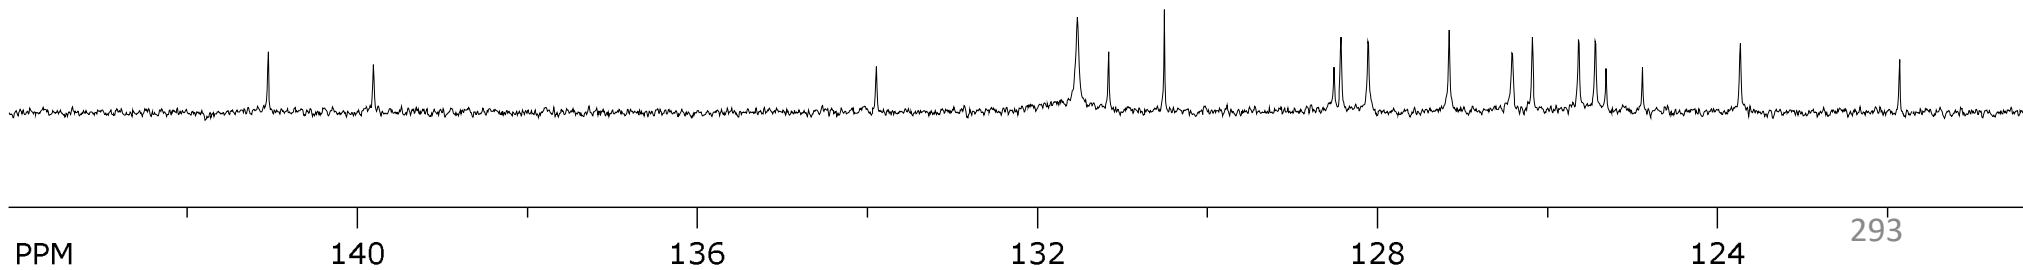

SpinWorks 4: AD-1844  
PROTON CDCl3 /opt/topspin3.5pl2/nmrdata nmrsu 47

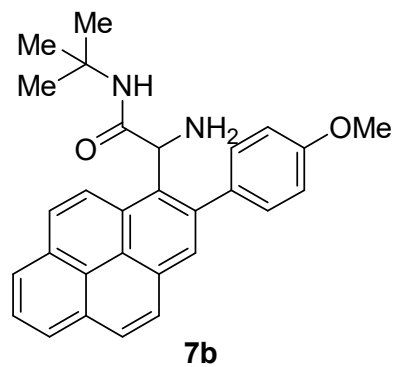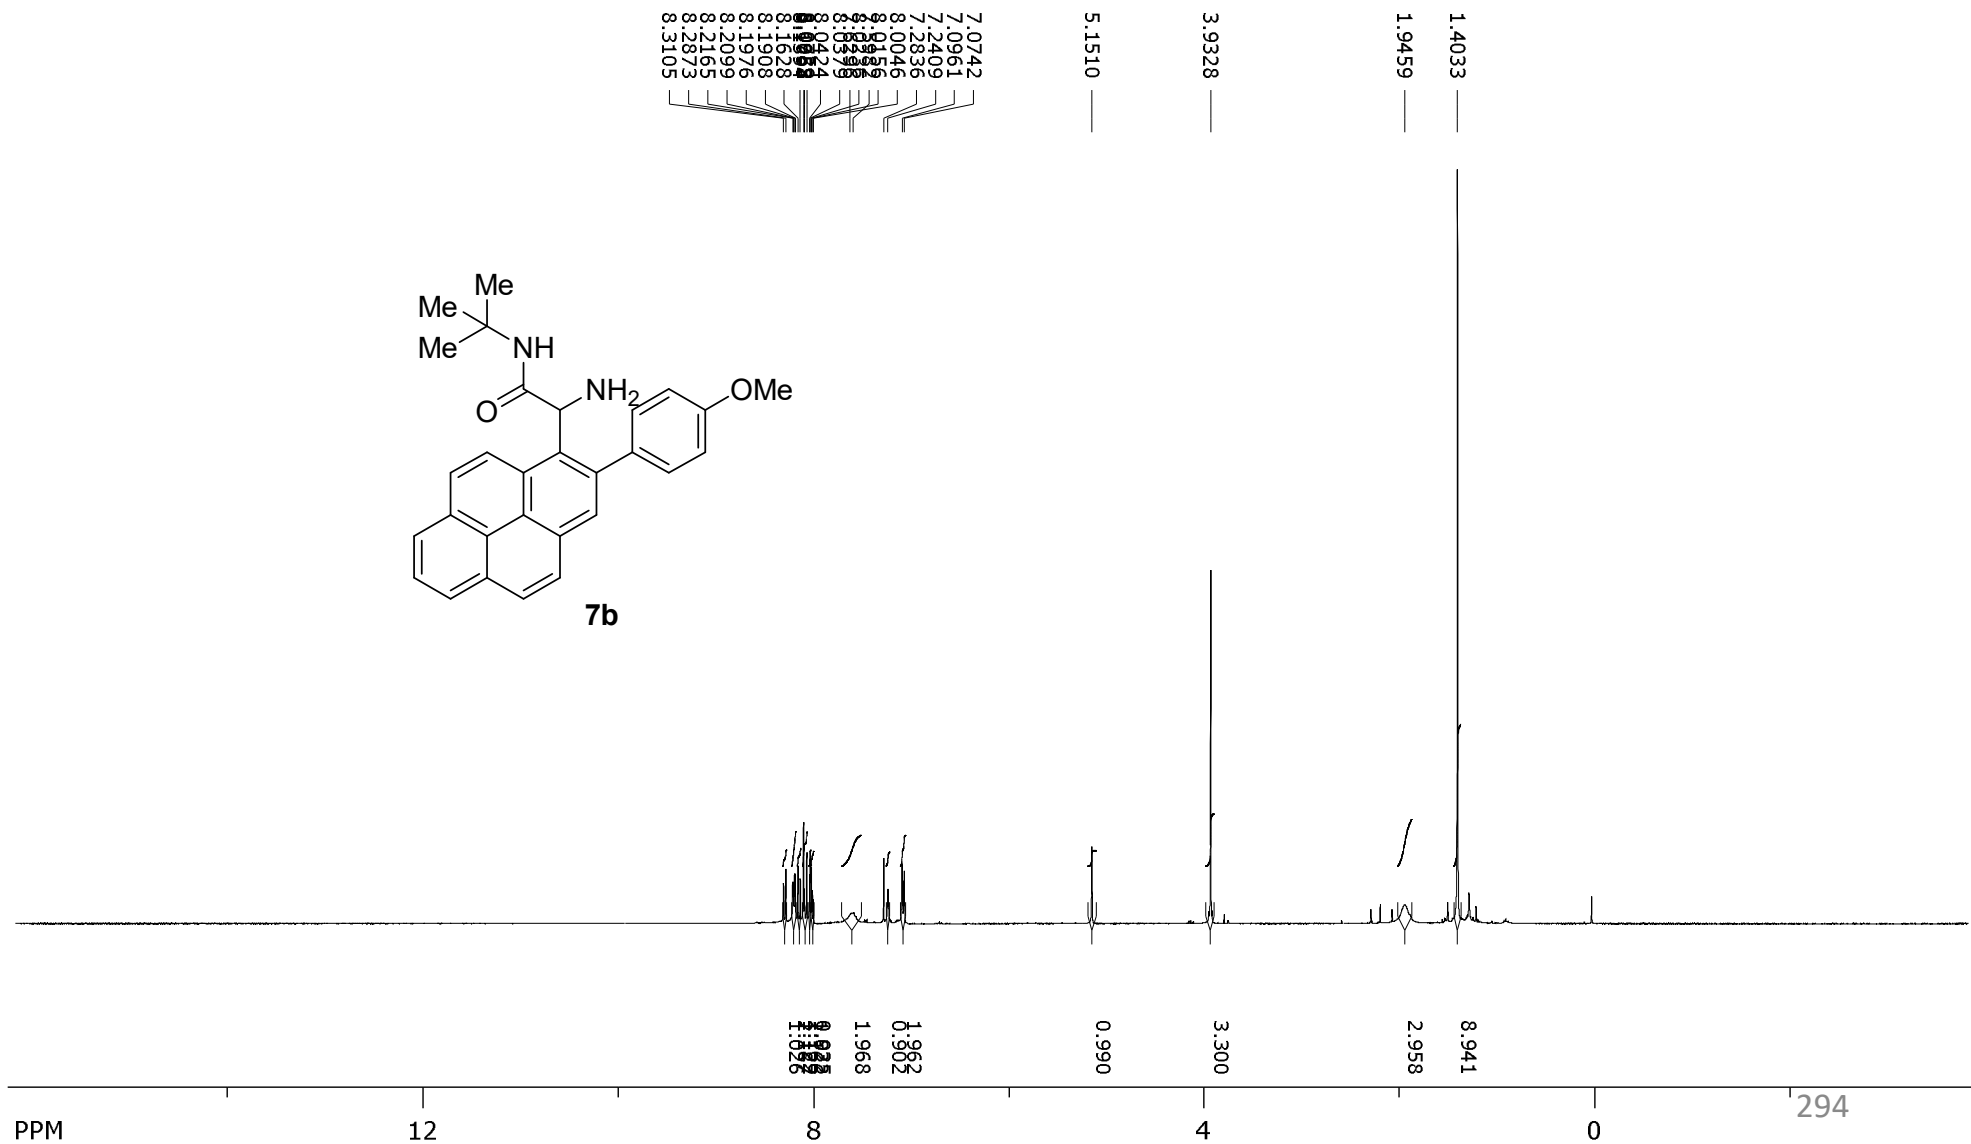

SpinWorks 4: AD-1844

PROTON CDCl3 /opt/topspin3.5pl2/nmrdata nmrsu 47

8.0046  
8.0156  
8.0236  
8.0379  
8.0424  
8.0729  
8.0953  
8.1058  
8.1394  
8.1628  
8.1908  
8.1976  
8.2099  
8.2165  
8.2873  
8.3105

7.5982  
7.6296

7.2836  
7.2409

7.0742  
7.0961

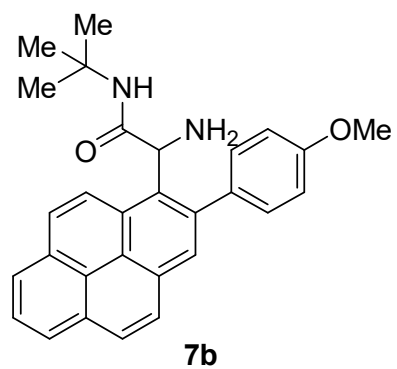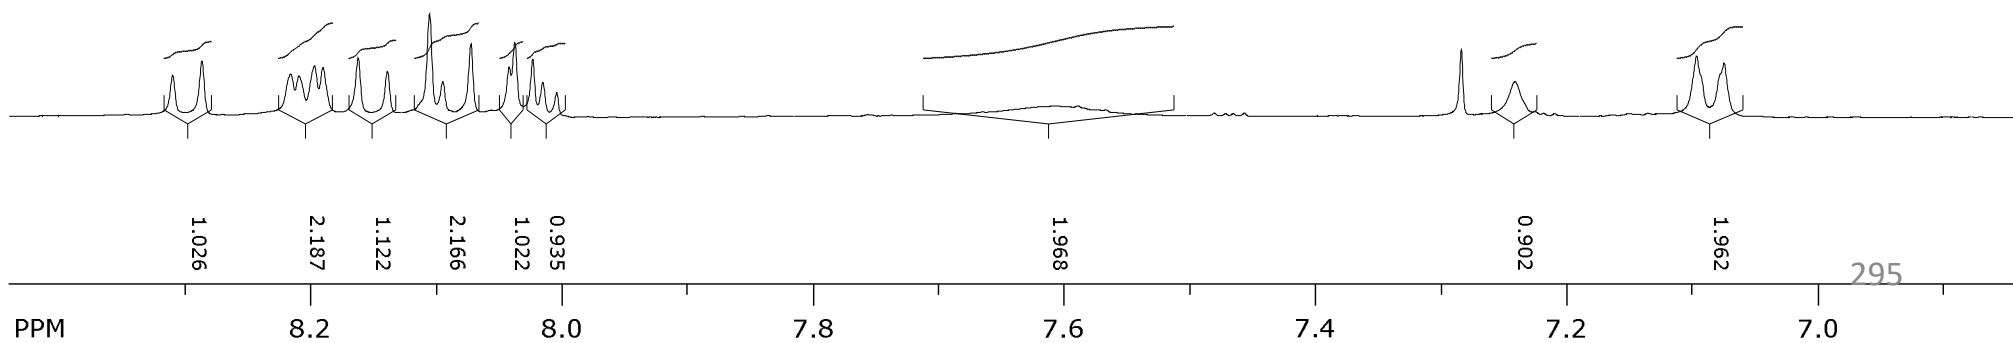

SpinWorks 4: AD-1844  
C13CPD256 CDCl3 /opt/topspin3.5pl2/nmrdata nmrsu 47

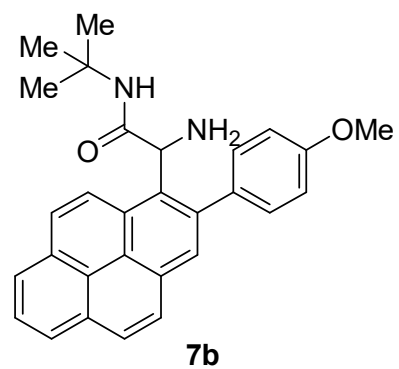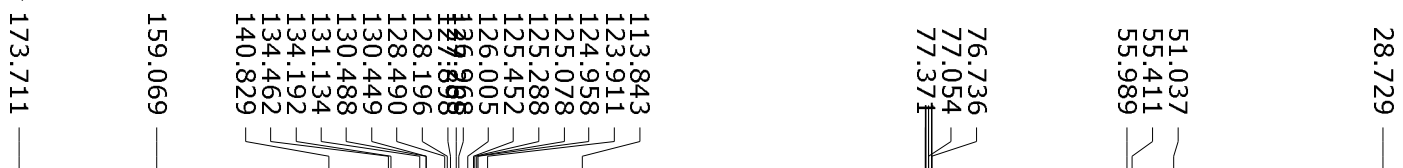

PPM 160 120 80 40 296 0



SpinWorks 4: AD-1844  
C13CPD256 CDCl3 /opt/topspin3.5pl2/nmrdata nmrsu 47

173.711

159.069

140.829

123.911  
124.958  
125.078  
125.288  
125.452  
126.005  
126.968  
127.265  
127.898  
128.196  
128.490  
130.449  
130.488  
131.134  
134.192  
134.462

113.843

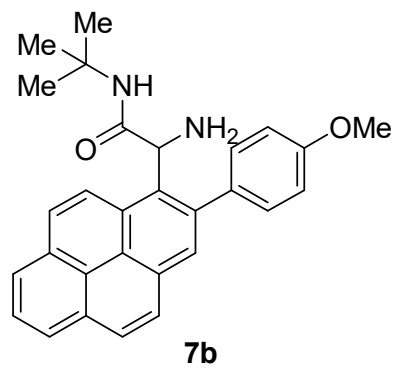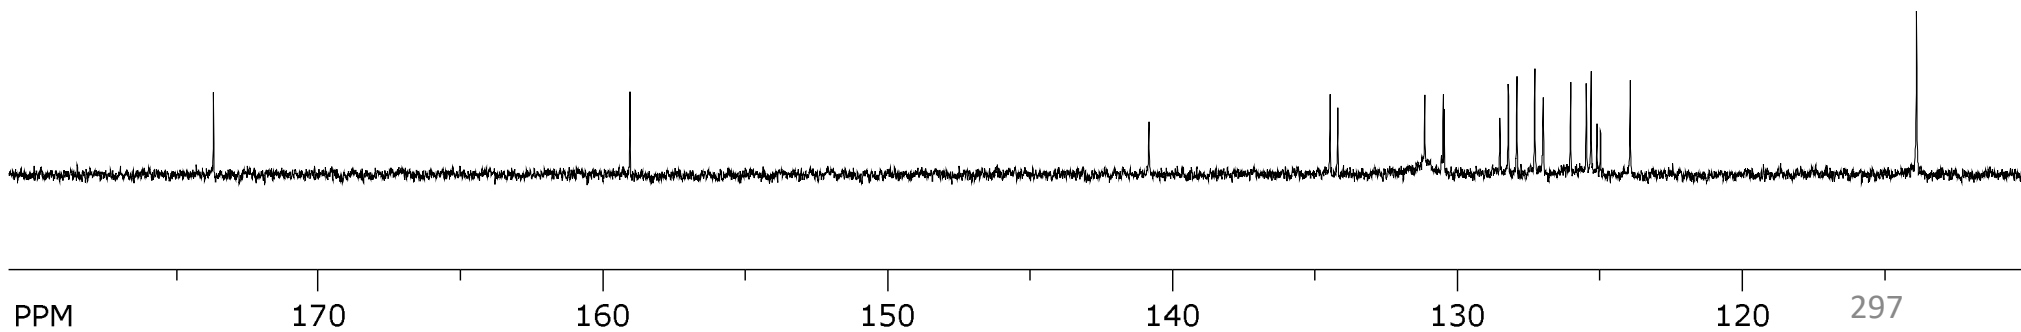

SpinWorks 4: AD-1981  
PROTON CDCl3 /opt/topspin3.5pl2/nmrdata nmrsu 7

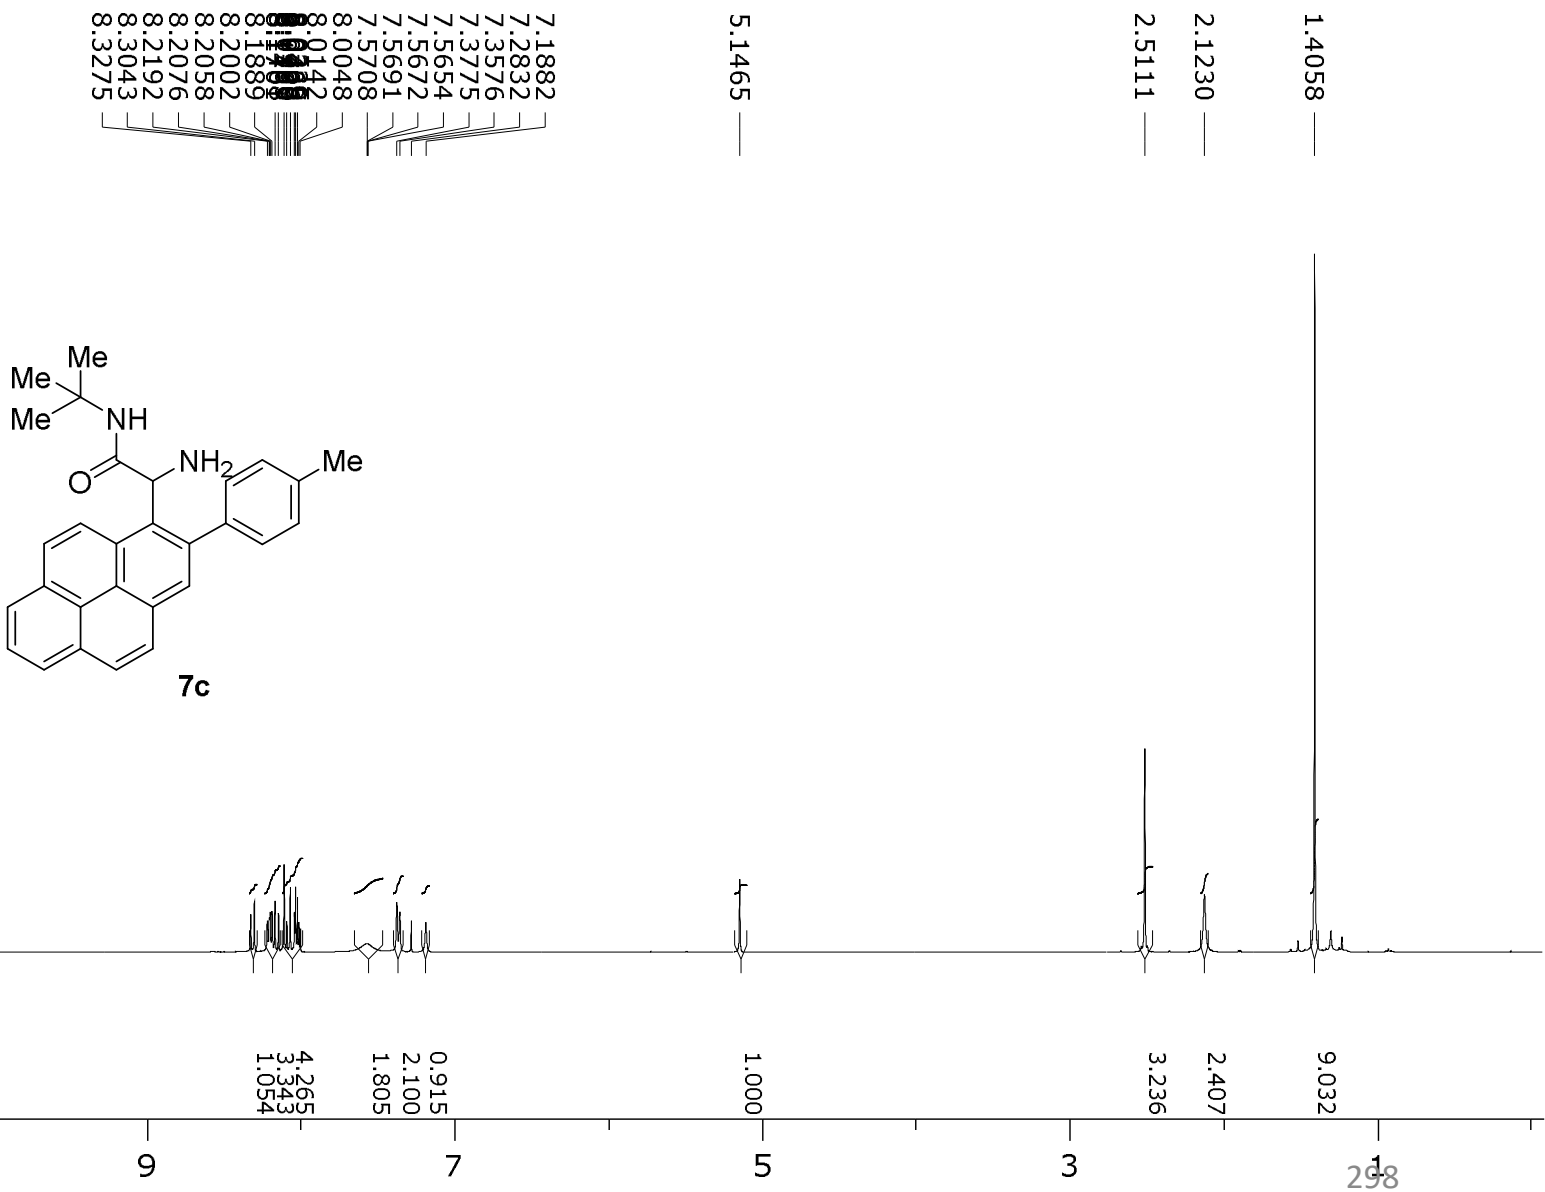

SpinWorks 4: AD-1981  
PROTON CDCl3 /opt/topspin3.5pl2/nmrdata nmrsu 7

8.0048  
8.0142  
8.0239  
8.0365  
8.0429  
8.0706  
8.0930  
8.1103  
8.1468  
8.1701  
8.1889  
8.2002  
8.2058  
8.2076  
8.2192  
8.3043  
8.3275

7.5654  
7.5672  
7.5691  
7.5708

7.3576  
7.3775

7.2832

7.1882

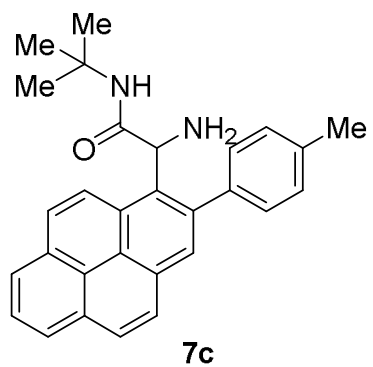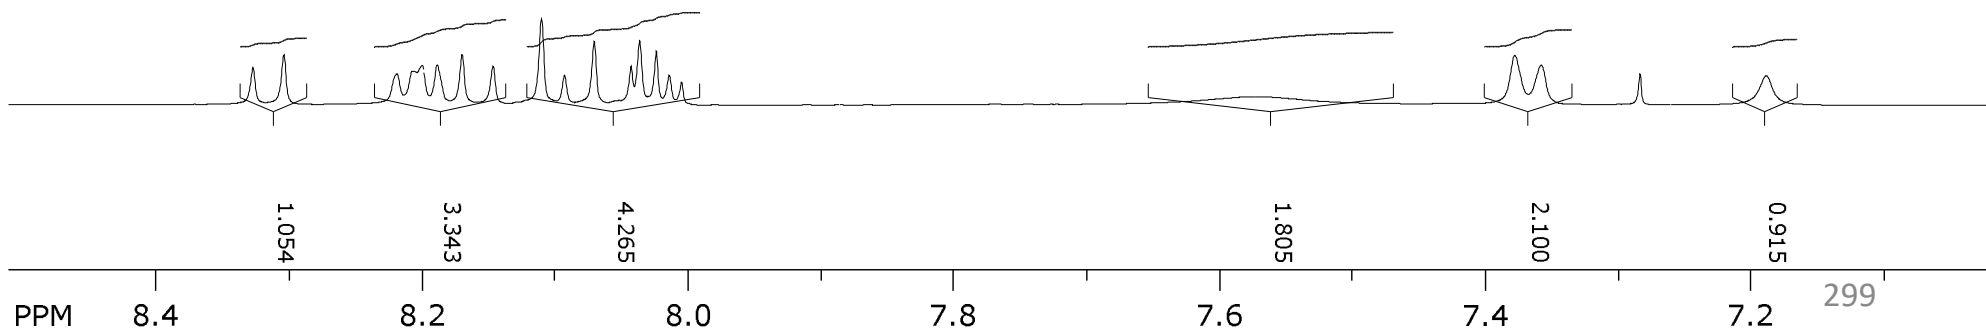

SpinWorks 4: AD-1981  
C13CPD256 CDCl3 /opt/topspin3.5pl2/nmrdata nmrsu 7

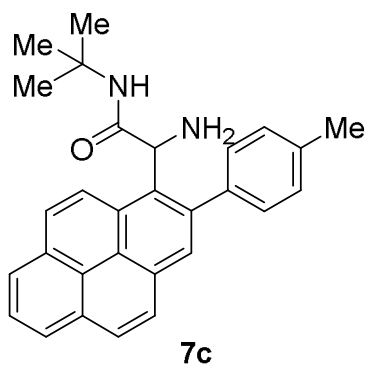

123.961  
124.954  
125.126  
125.303  
125.458  
126.023  
126.857  
127.899  
128.911  
129.134  
130.459  
130.515  
131.149  
134.015  
137.161  
139.231  
141.182

76.765  
77.083  
77.400

56.002  
51.042

28.731  
21.298

PPM

160

120

80

40

300

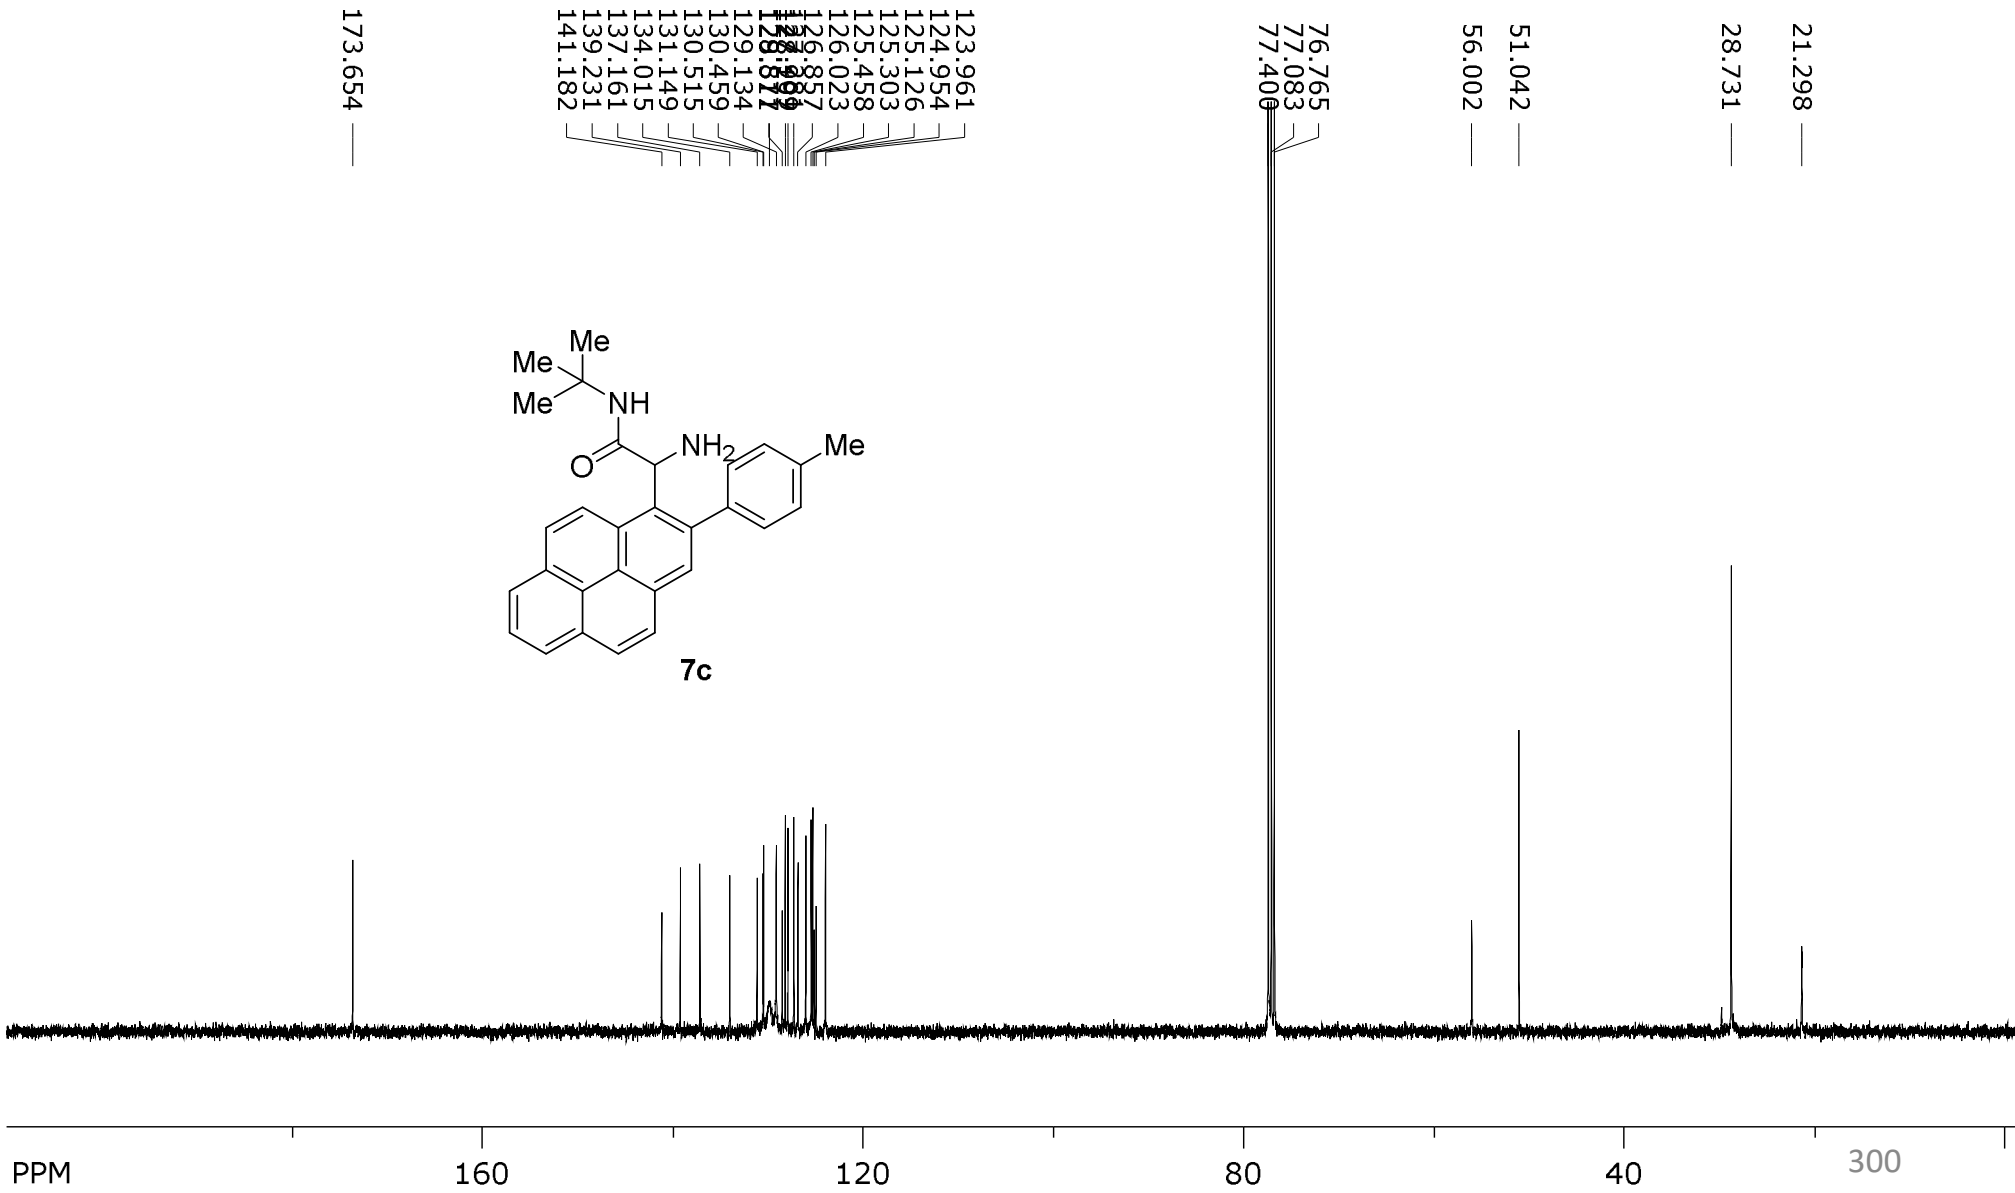

SpinWorks 4: AD-1981  
C13CPD256 CDCl3 /opt/topspin3.5pl2/nmrdata nmrsu 7

141.182 —  
139.231 —  
137.161 —  
134.015 —  
131.149 —  
130.459 —  
130.515 —  
129.877 —  
129.134 —  
128.511 —  
127.909 —  
128.197 —  
127.281 —  
126.857 —  
126.023 —  
125.458 —  
125.303 —  
125.126 —  
124.954 —  
123.961 —

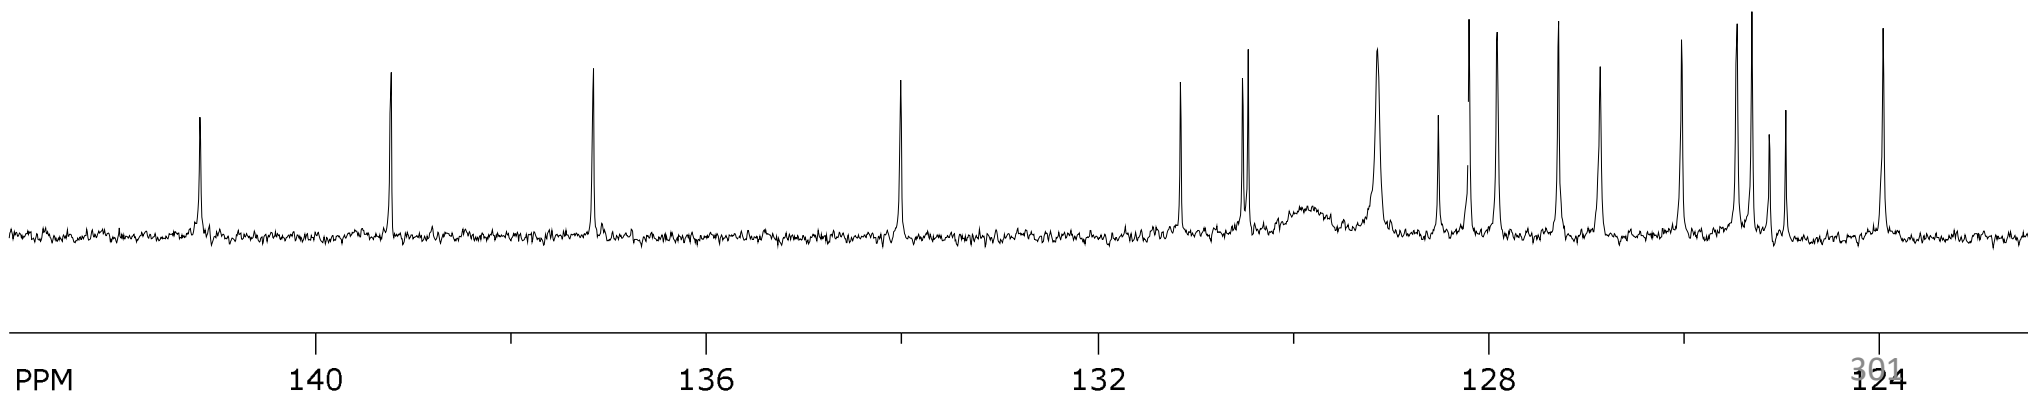

SpinWorks 4: AD-1886  
PROTON CDCl3 /opt/topspin3.5pl2/nmrdata nmrsu 30

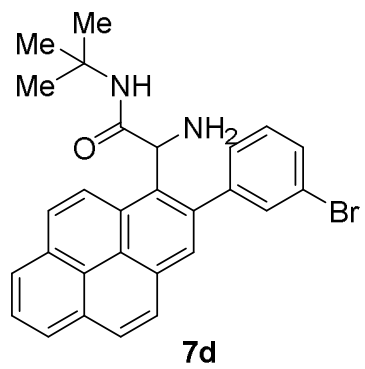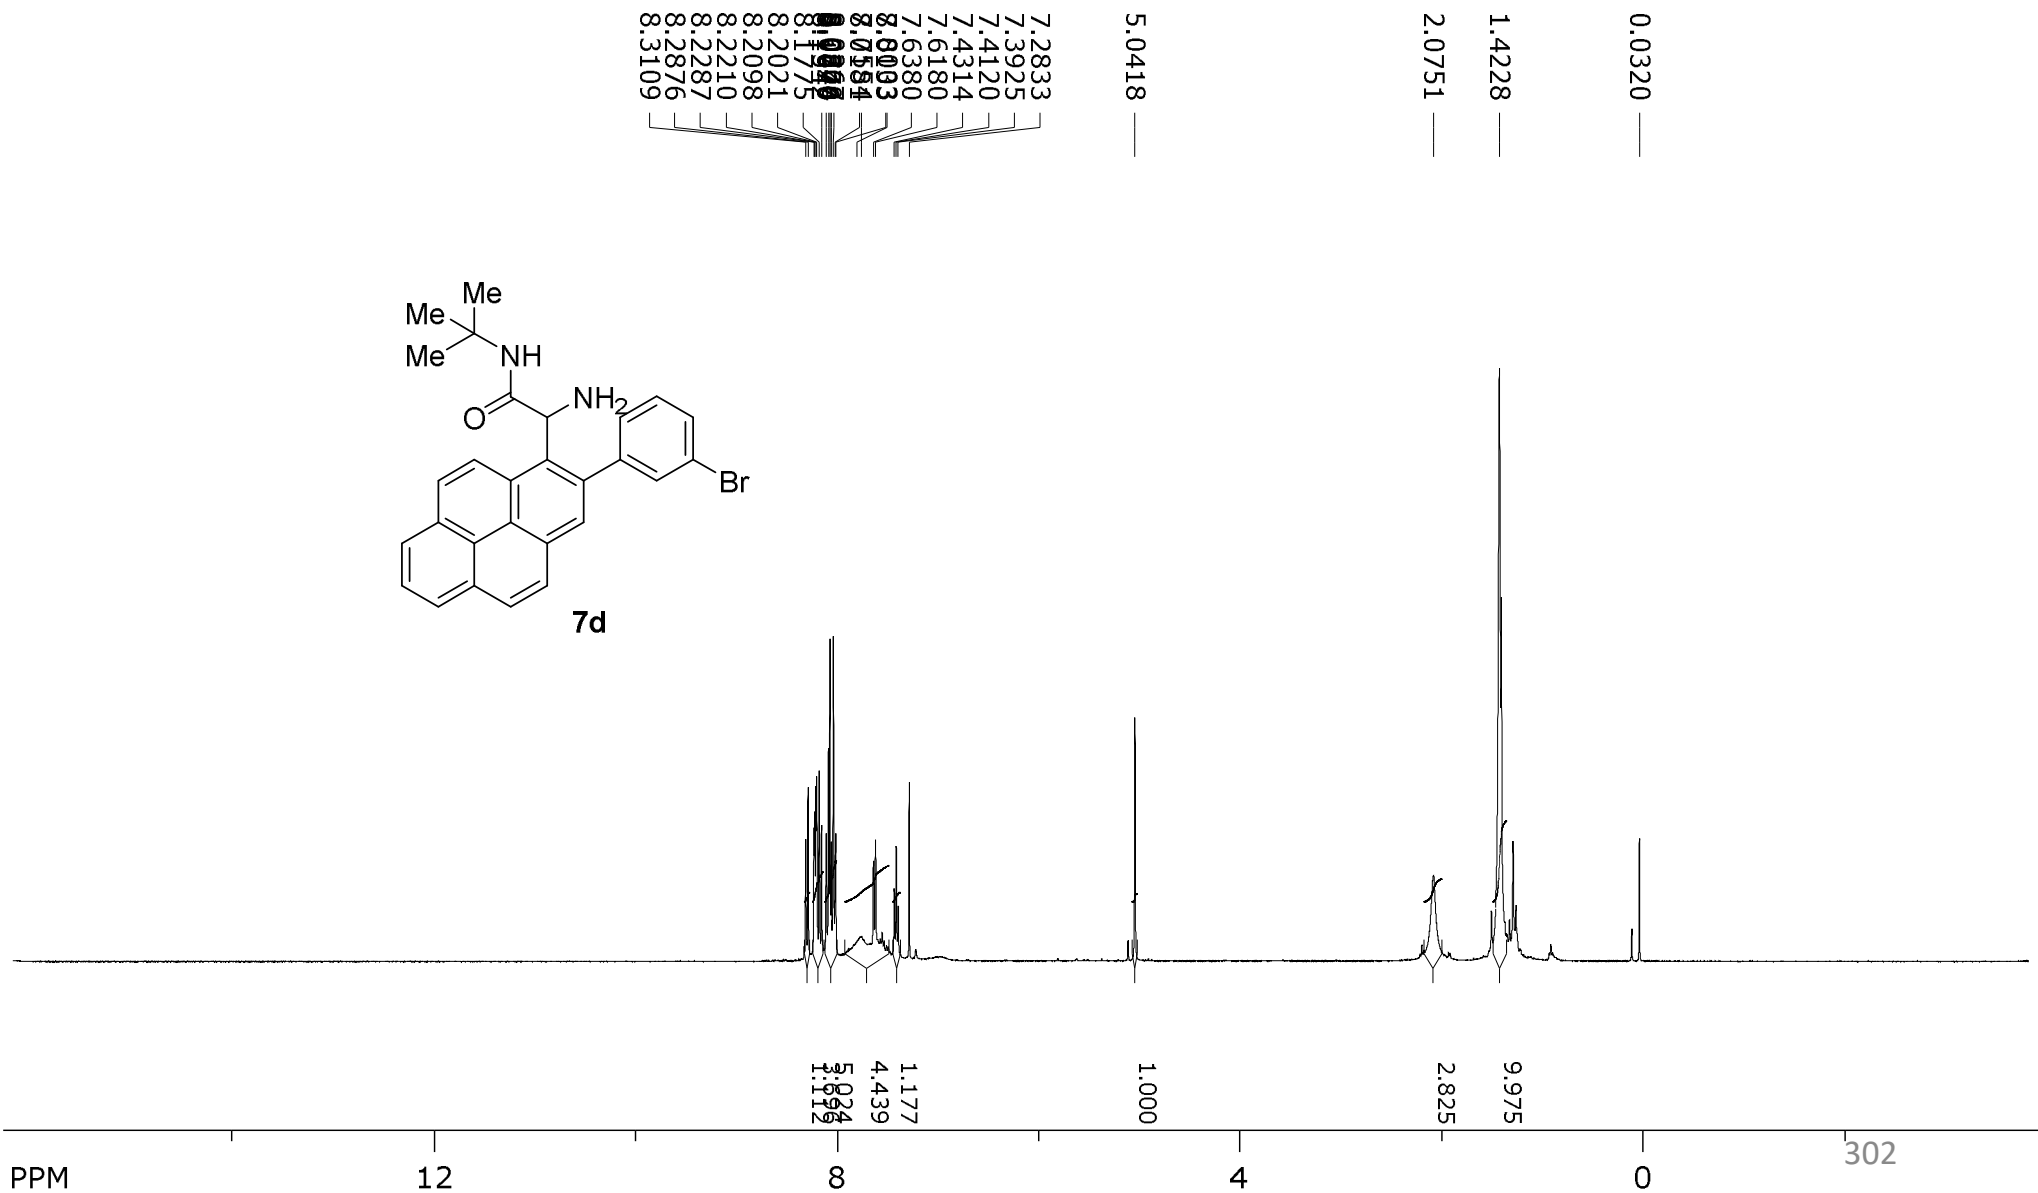

SpinWorks 4: AD-1886  
PROTON CDCl3 /opt/topspin3.5pl2/nmrdata nmrsu 30

8.0133  
8.0181  
8.0367  
8.0570  
8.0704  
8.0846  
8.1070  
8.1542  
8.1775  
8.2021  
8.2098  
8.2210  
8.2287  
8.2876  
8.3109  
7.8003  
7.7554  
7.6180  
7.6380  
7.3925  
7.4120  
7.4314  
7.2833

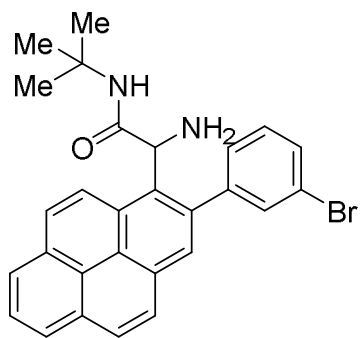

7d

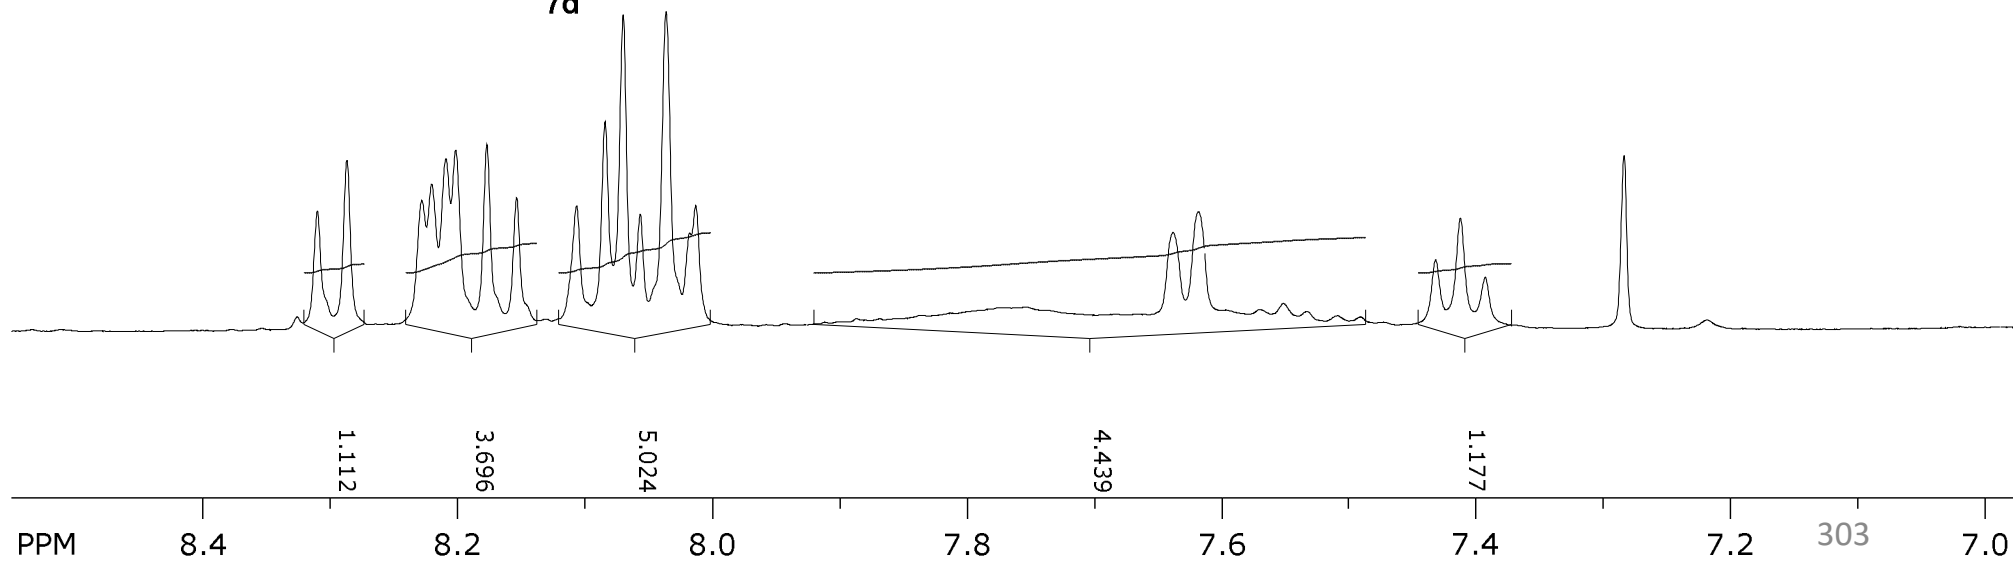

SpinWorks 4: AD 1886 RE  
C13CPD256 CDCl3 /opt/topspin3.5pl2/nmrdata nmrsu 44

173.262  
144.185  
139.480  
132.406  
131.111  
130.521  
130.462  
129.895  
128.514  
128.499  
128.498  
128.497  
125.609  
125.410  
125.284  
124.771  
123.731  
122.441

76.742  
77.060  
77.378

55.951  
51.086

28.702

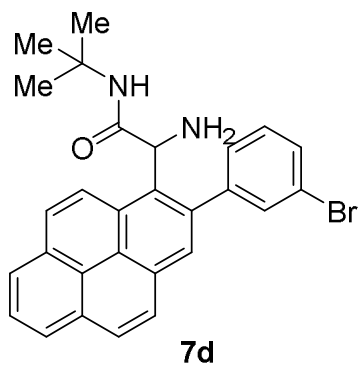

PPM 160 120 80 40 0

304



SpinWorks 4: AD 1886 RE  
C13CPD256 CDCl3 /opt/topspin3.5pl2/nmrdata nmrsu 44

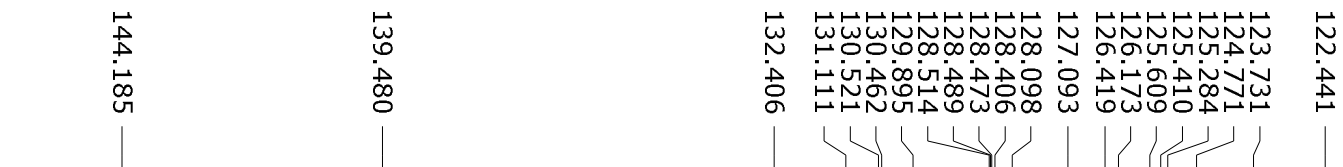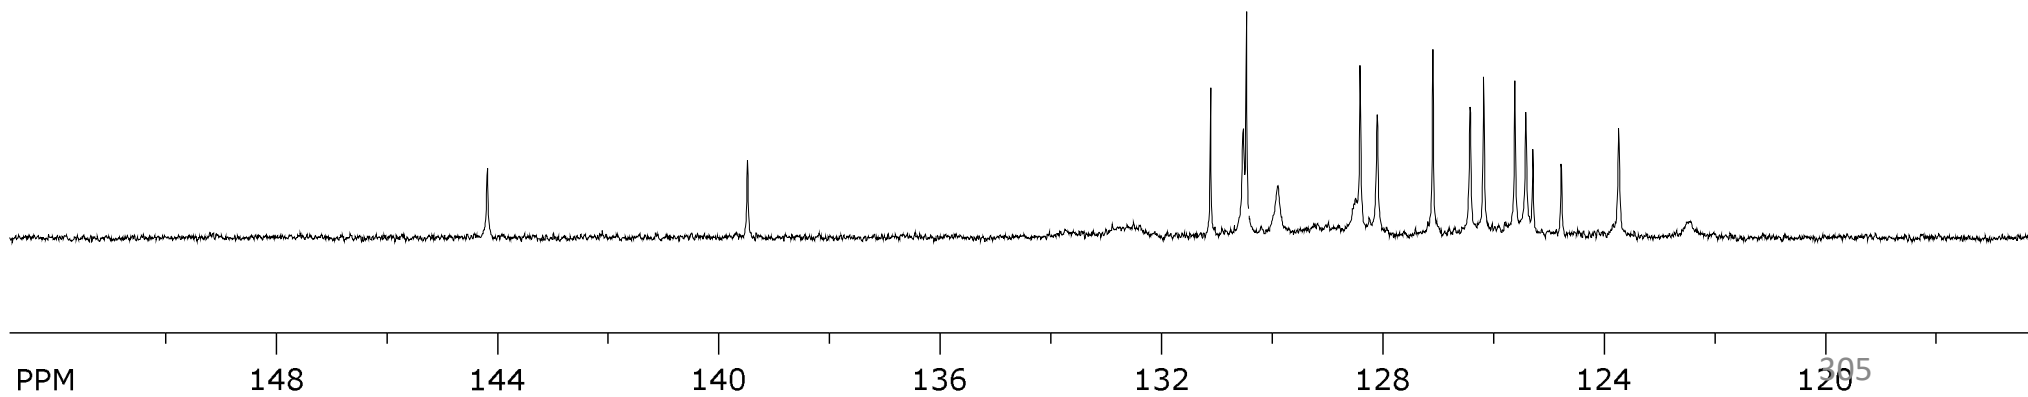

SpinWorks 4: SUB 90 RE  
PROTON CDCl3 /opt/topspin3.5pl2/nmrdata nmrsu 46

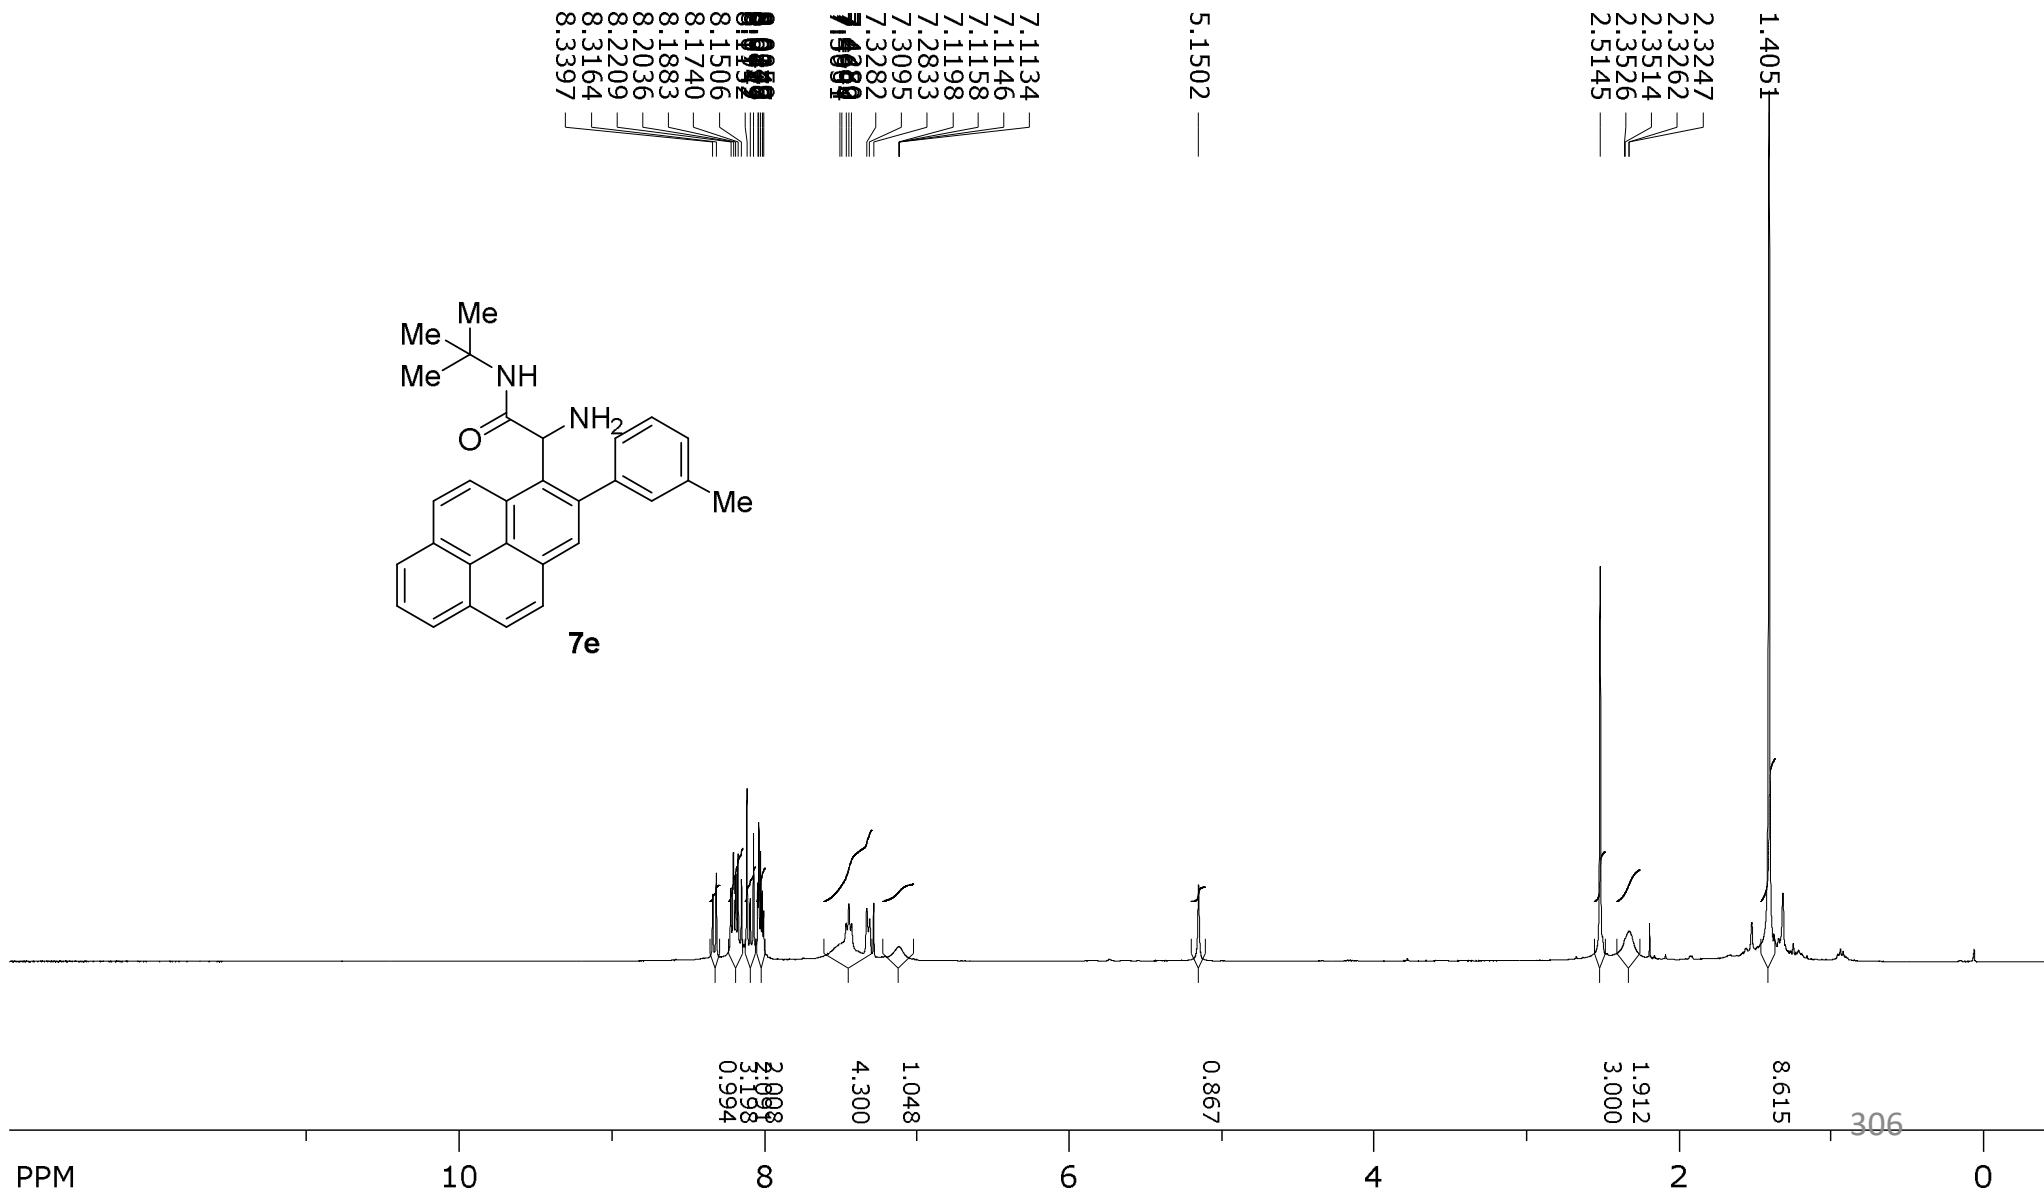

SpinWorks 4: SUB 90 RE  
PROTON CDCl3 /opt/topspin3.5pl2/nmrdata nmrsu 46

8.0059  
8.0147  
8.0249  
8.0370  
8.0438  
8.0719  
8.0942  
8.1152  
8.11506  
8.1740  
8.1883  
8.2036  
8.2209  
8.3164  
8.3397

7.4280  
7.4459  
7.4640  
7.4904  
7.5051

7.2833  
7.3095  
7.3282

7.1134  
7.1146  
7.1158  
7.1198

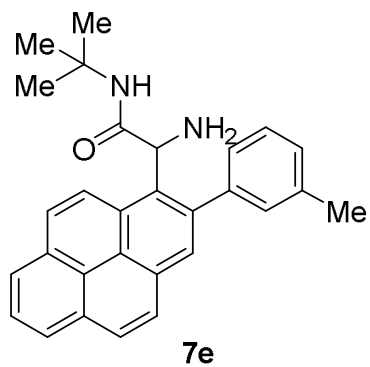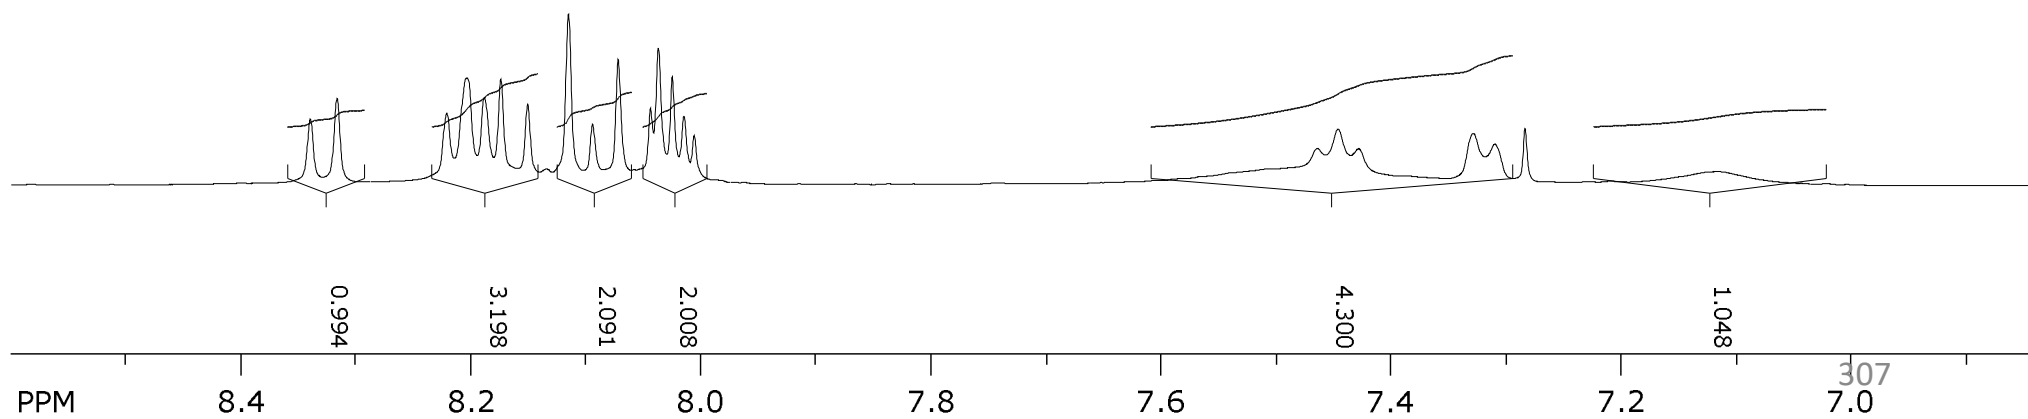

SpinWorks 4: SUB-90  
C13CPD256 CDCl3 /opt/topspin3.5pl2/nmrdata nmrsu 46

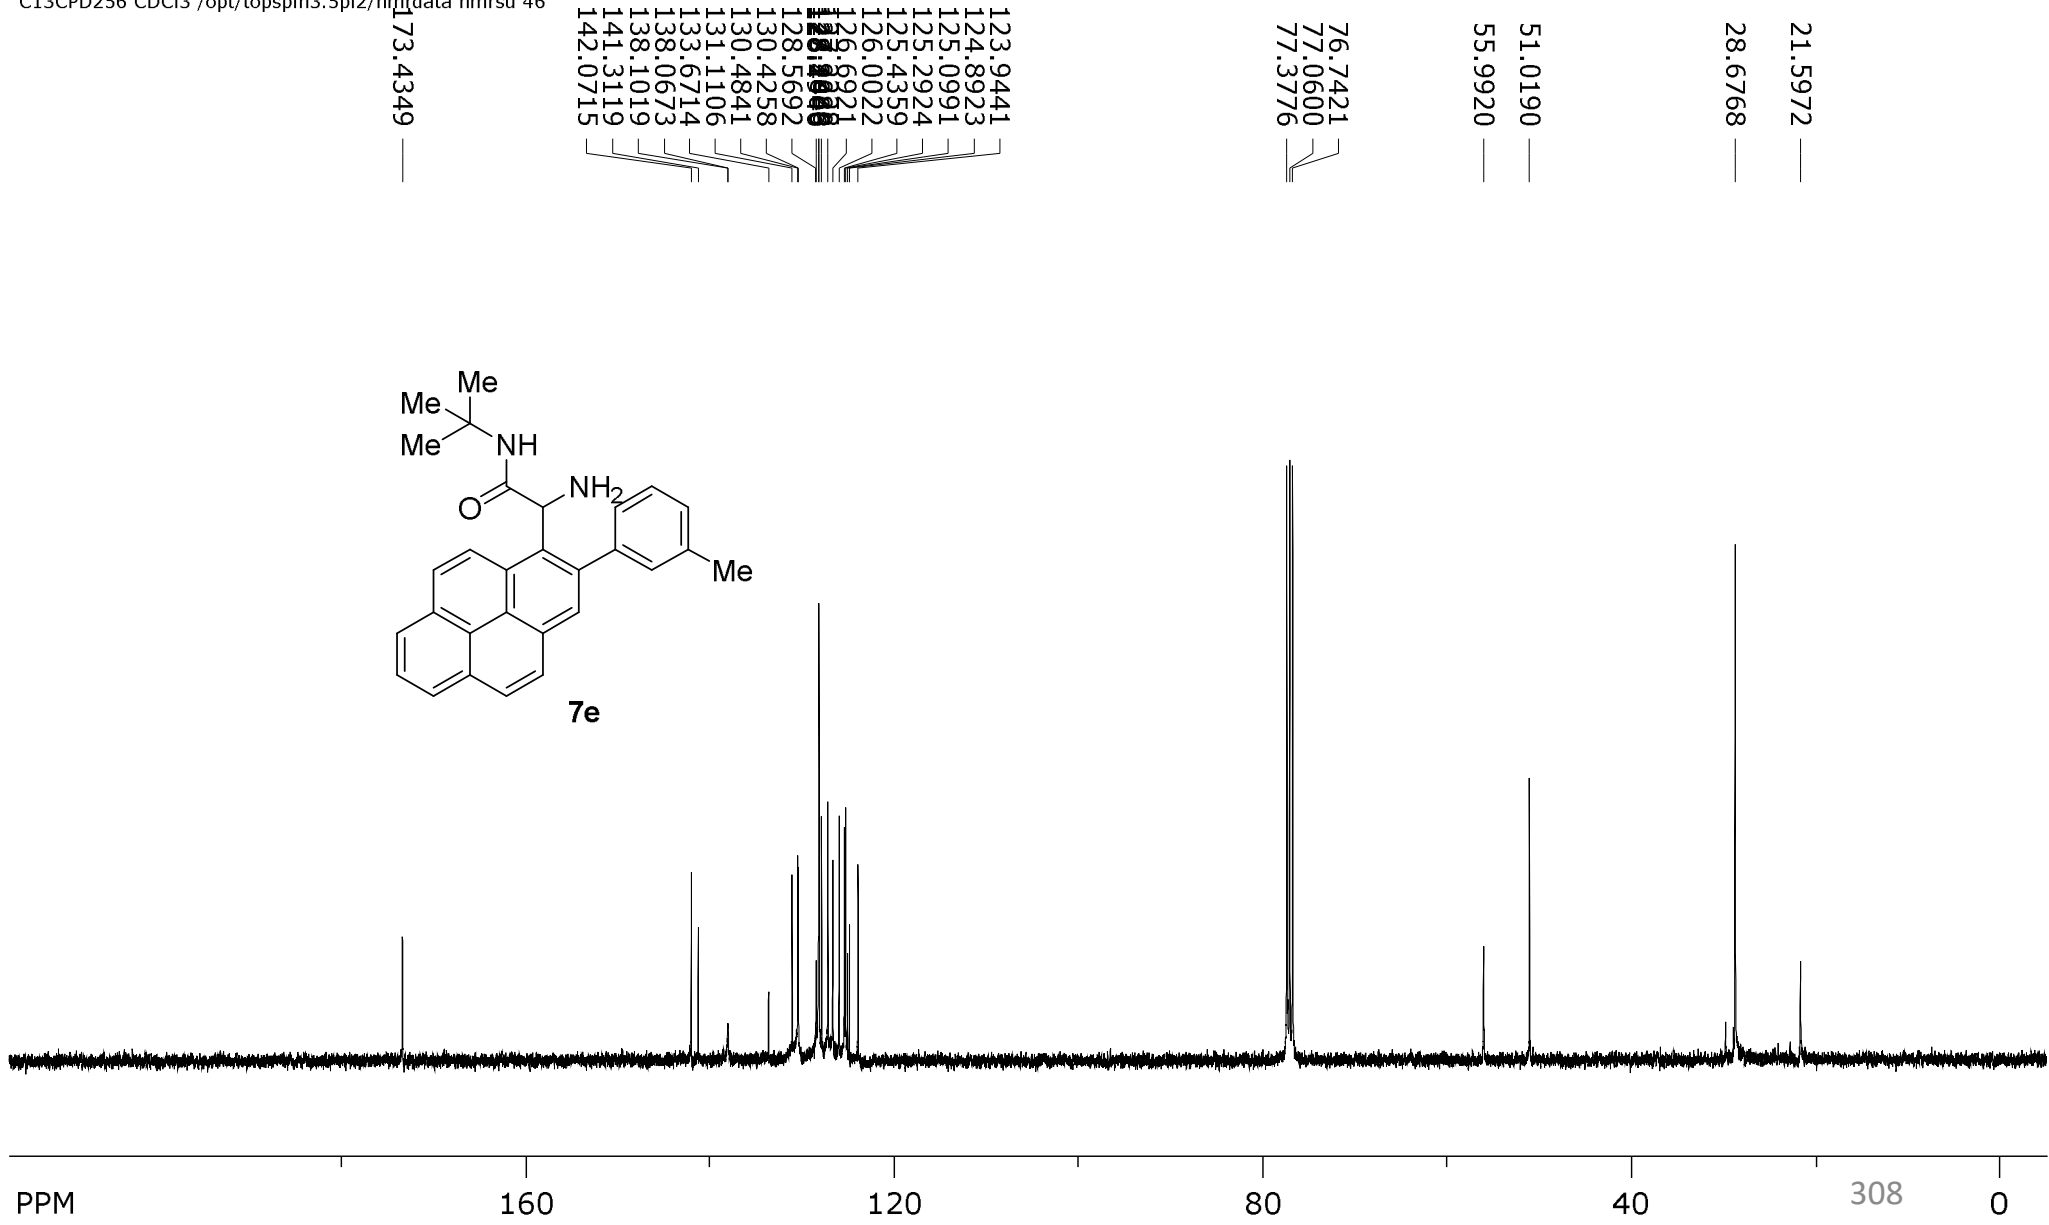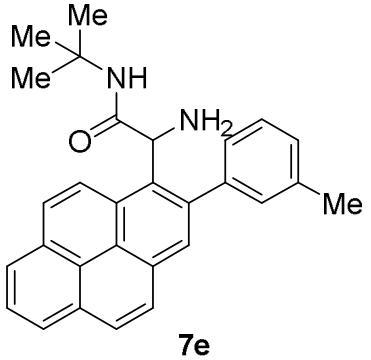

SpinWorks 4: SUB-90

C13CPD256 CDCl3 /opt/topspin3.5pl2/nmrdata nmr su 46

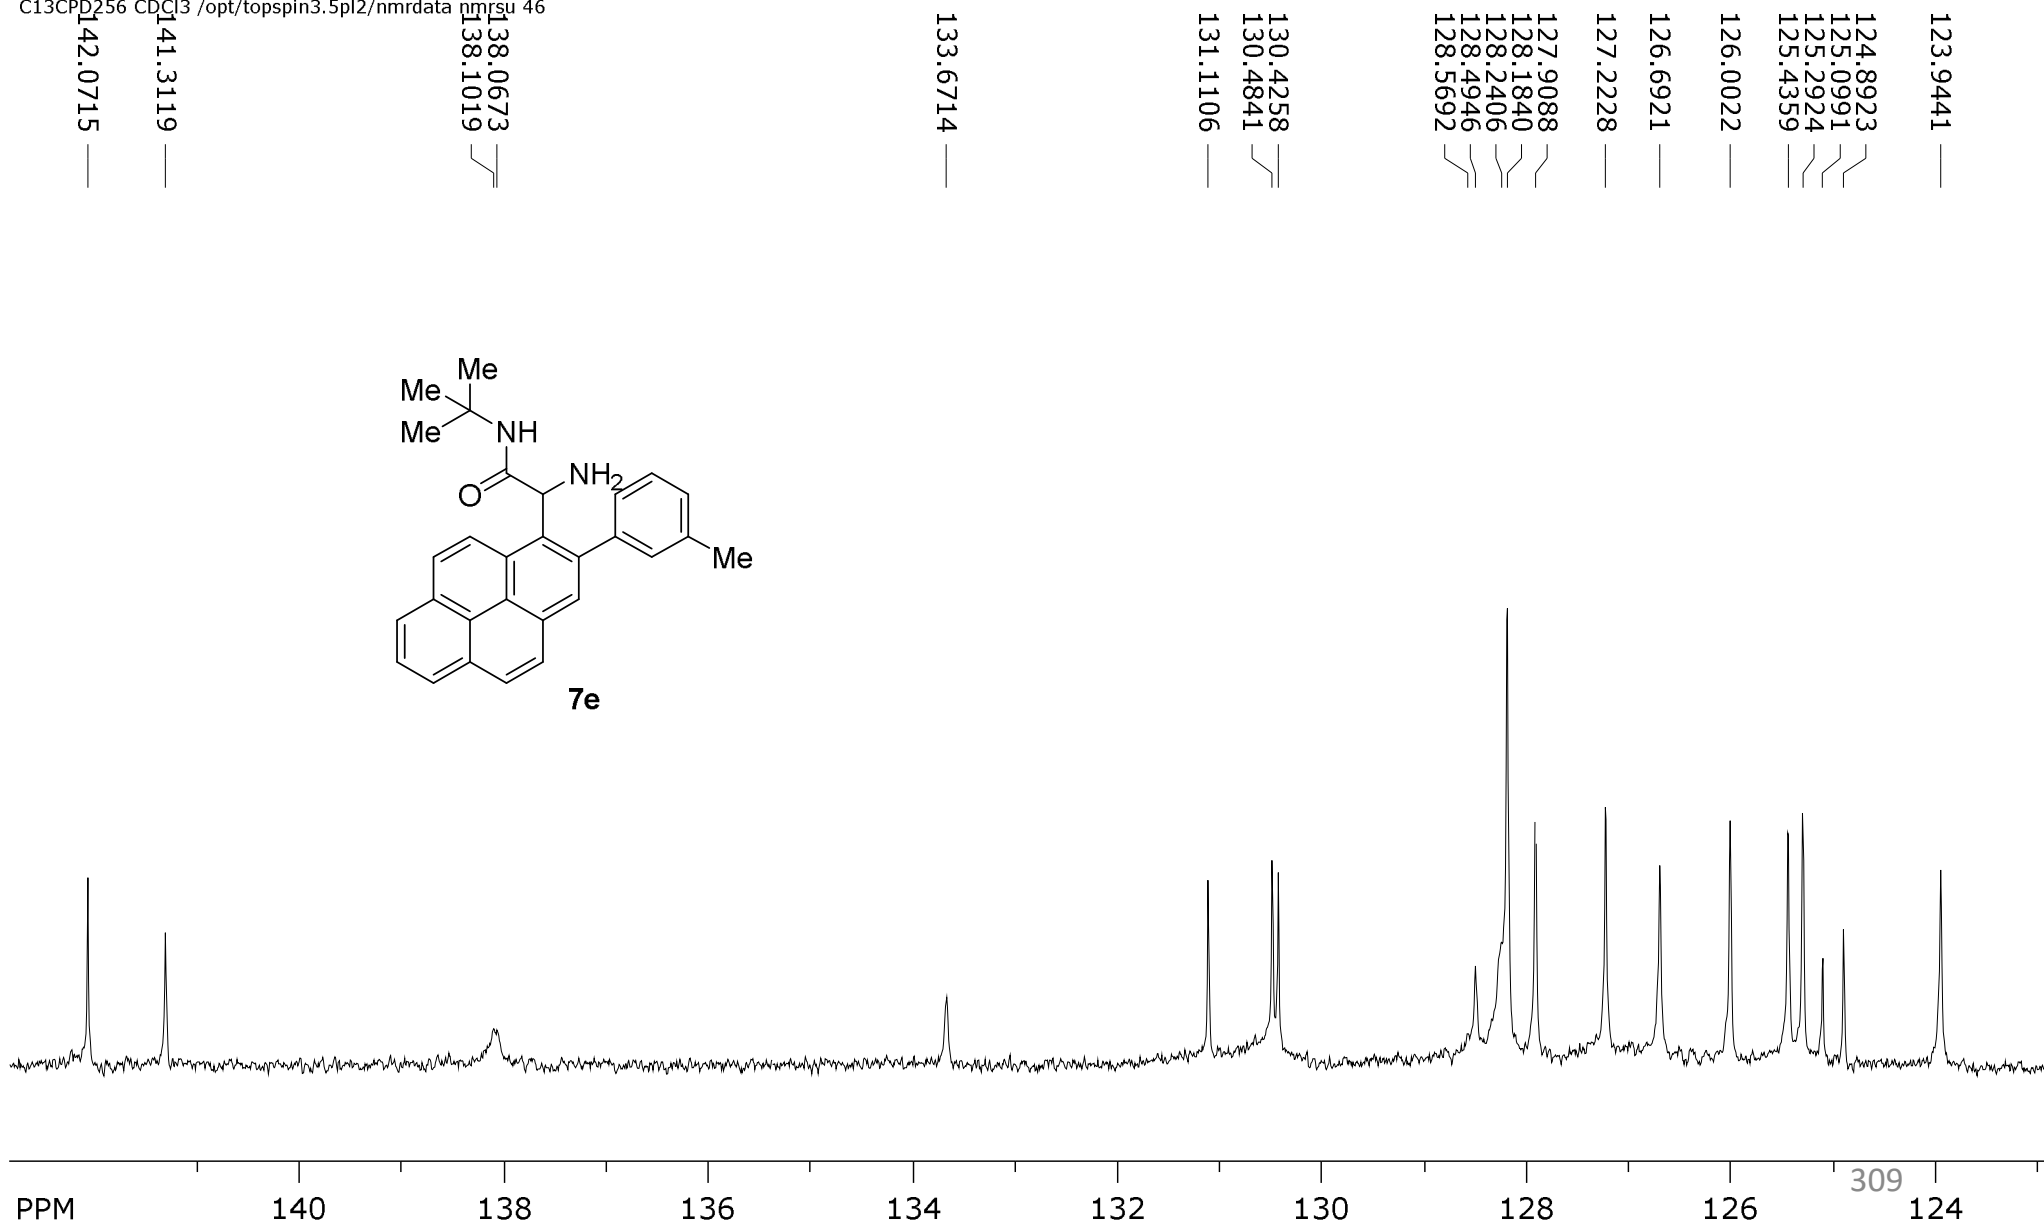

SpinWorks 4: SUB-210  
PROTON CDCl3 /opt/topspin3.5pl2/nmrdata nmrsu 5

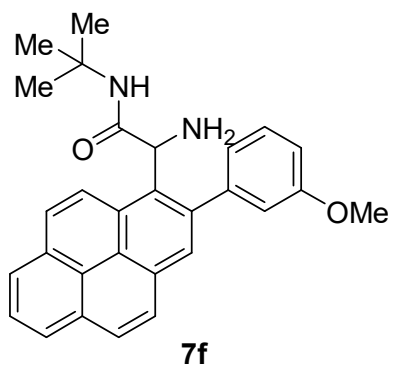

7.0271  
7.0320  
7.0478  
7.0528  
7.2834  
7.4401  
7.4597  
7.4792  
8.0085  
8.0208  
8.0275  
8.0343  
8.0411  
8.1717  
8.1925  
8.2027  
8.2112  
8.2217  
8.2883  
8.3116

5.1557  
3.9065  
2.0762  
1.4108

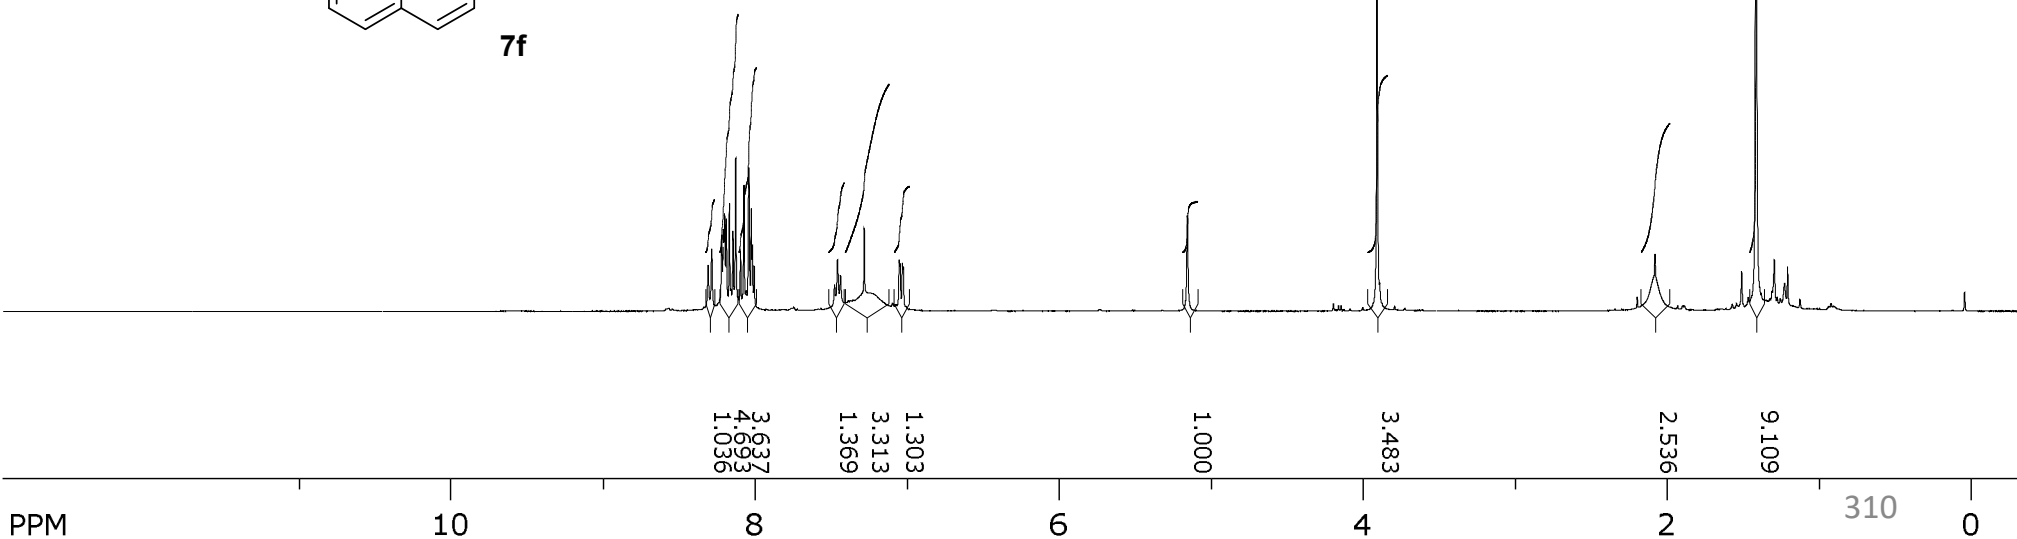

SpinWorks 4: SUB-210  
PROTON CDCl3 /opt/topspin3.5pl2/nmrdata nmrsu 5

8.0085  
8.0208  
8.0275  
8.0433  
8.0758  
8.0983  
8.1302  
8.1484  
8.1717  
8.1925  
8.2027  
8.2112  
8.2217  
8.2883  
8.3116

7.4401  
7.4597  
7.4792

7.2834

7.0271  
7.0320  
7.0478  
7.0528

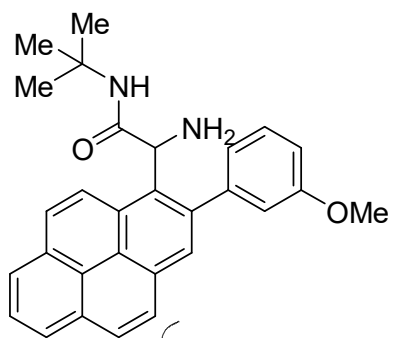

7f

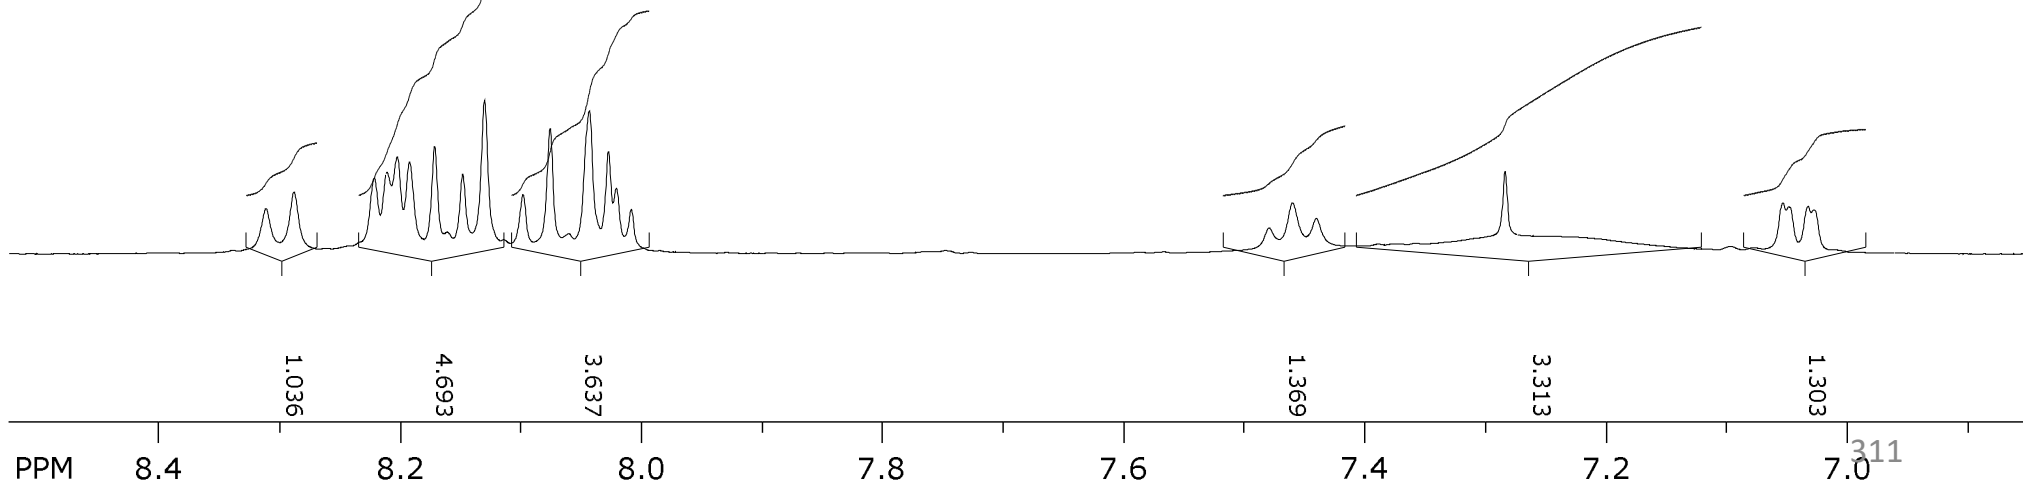

SpinWorks 4: SUB-210  
C13CPD256 CDCl3 /opt/topspin3.5pl2/nmrdata nmrsu 5

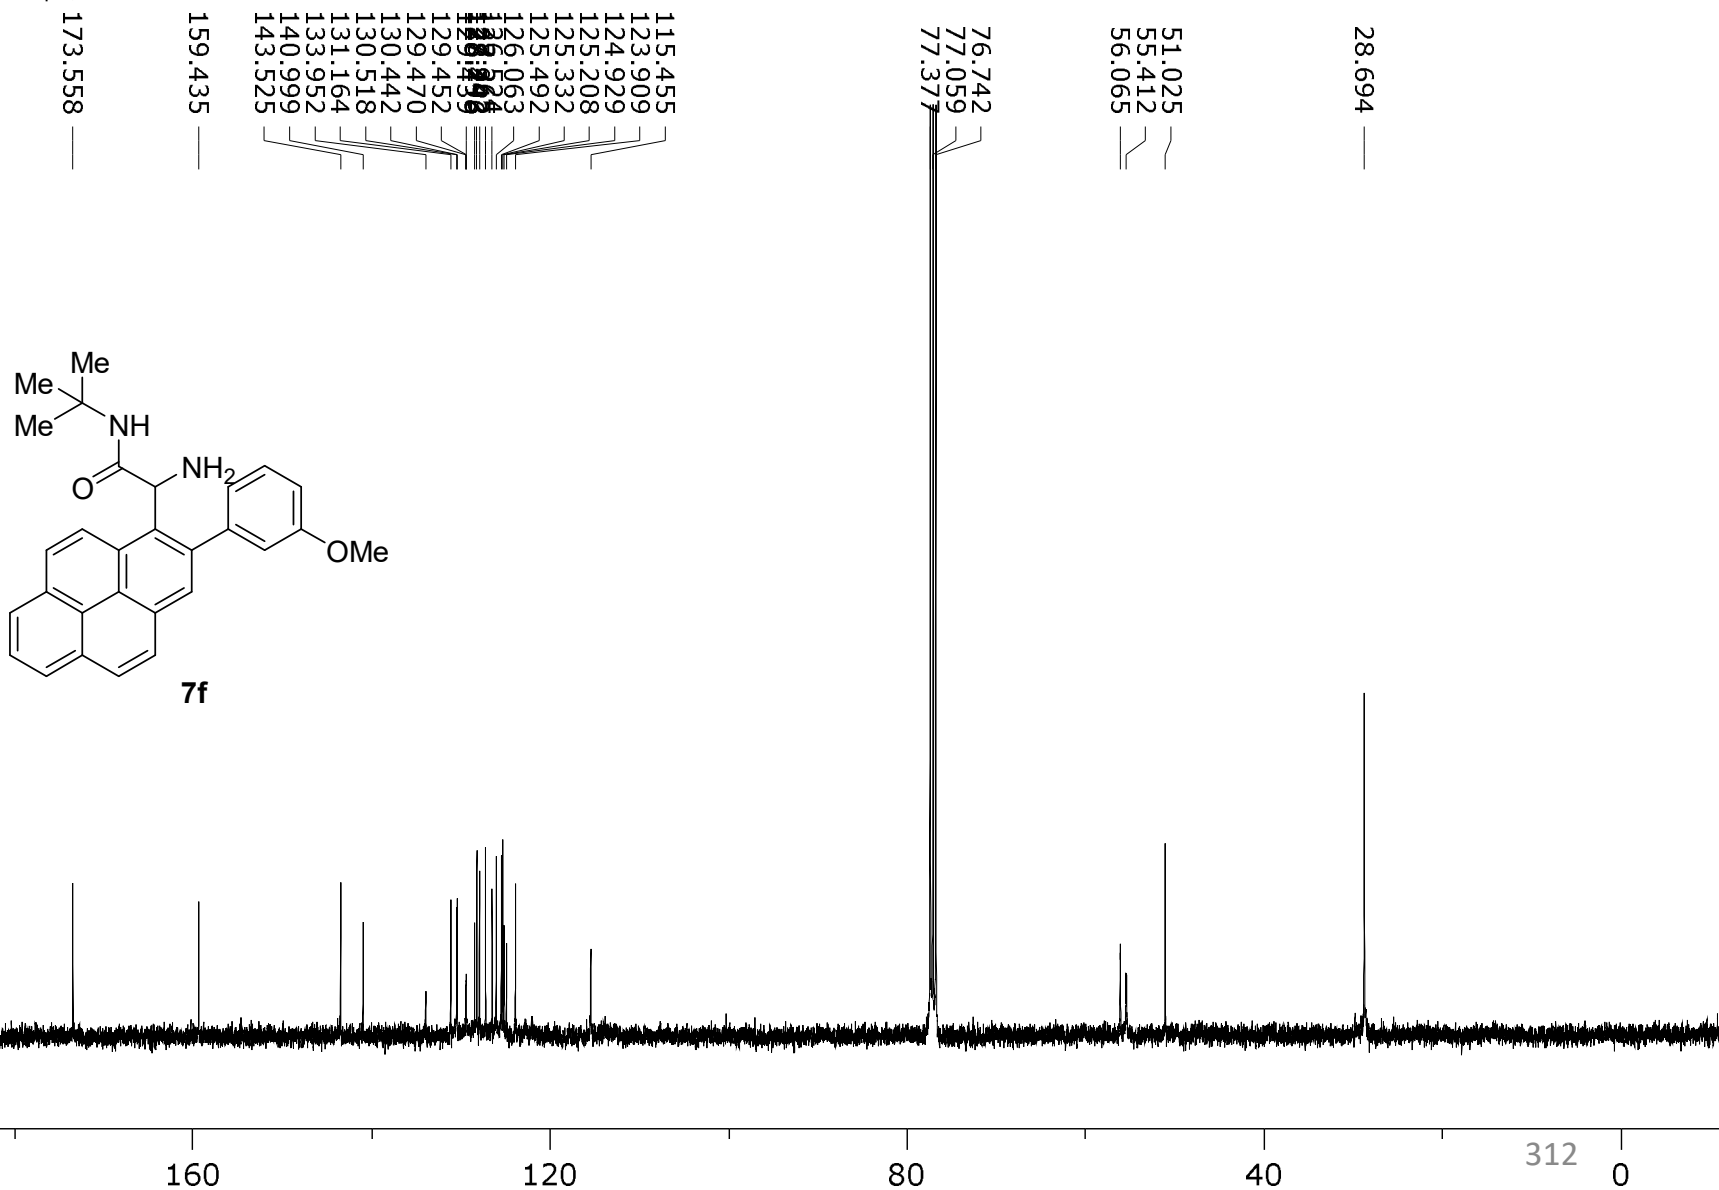



SpinWorks 4: SUB-210  
C13CPD256 CDCl3 /opt/topspin3.5pl2/nmrdata nmrsu 5

143.525

140.999

133.952

129.439

129.452

129.470

130.442

130.518

131.164

128.496

128.243

127.942

127.265

126.524

126.063

125.492

125.332

125.208

124.929

123.909

115.455

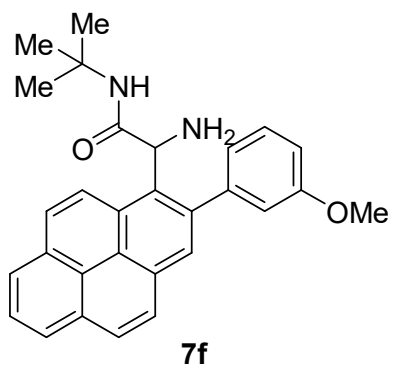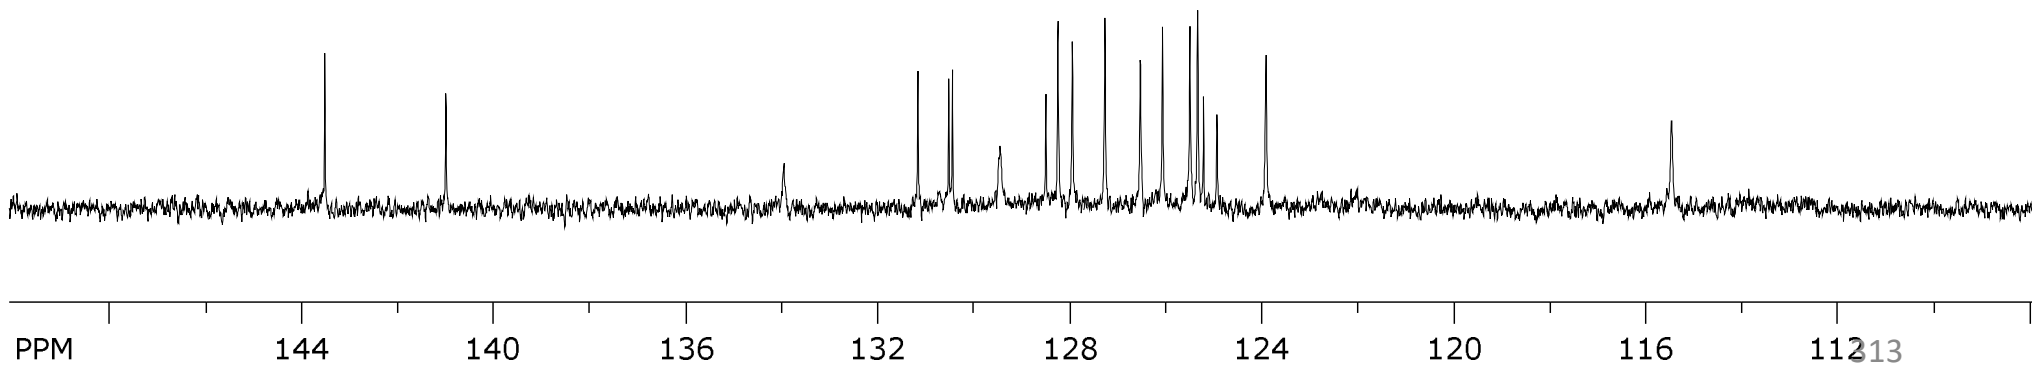

SpinWorks 4: AD-2190  
PROTON CDCl3 /opt/topspin3.5pl2/nmrdata nmrsu 29

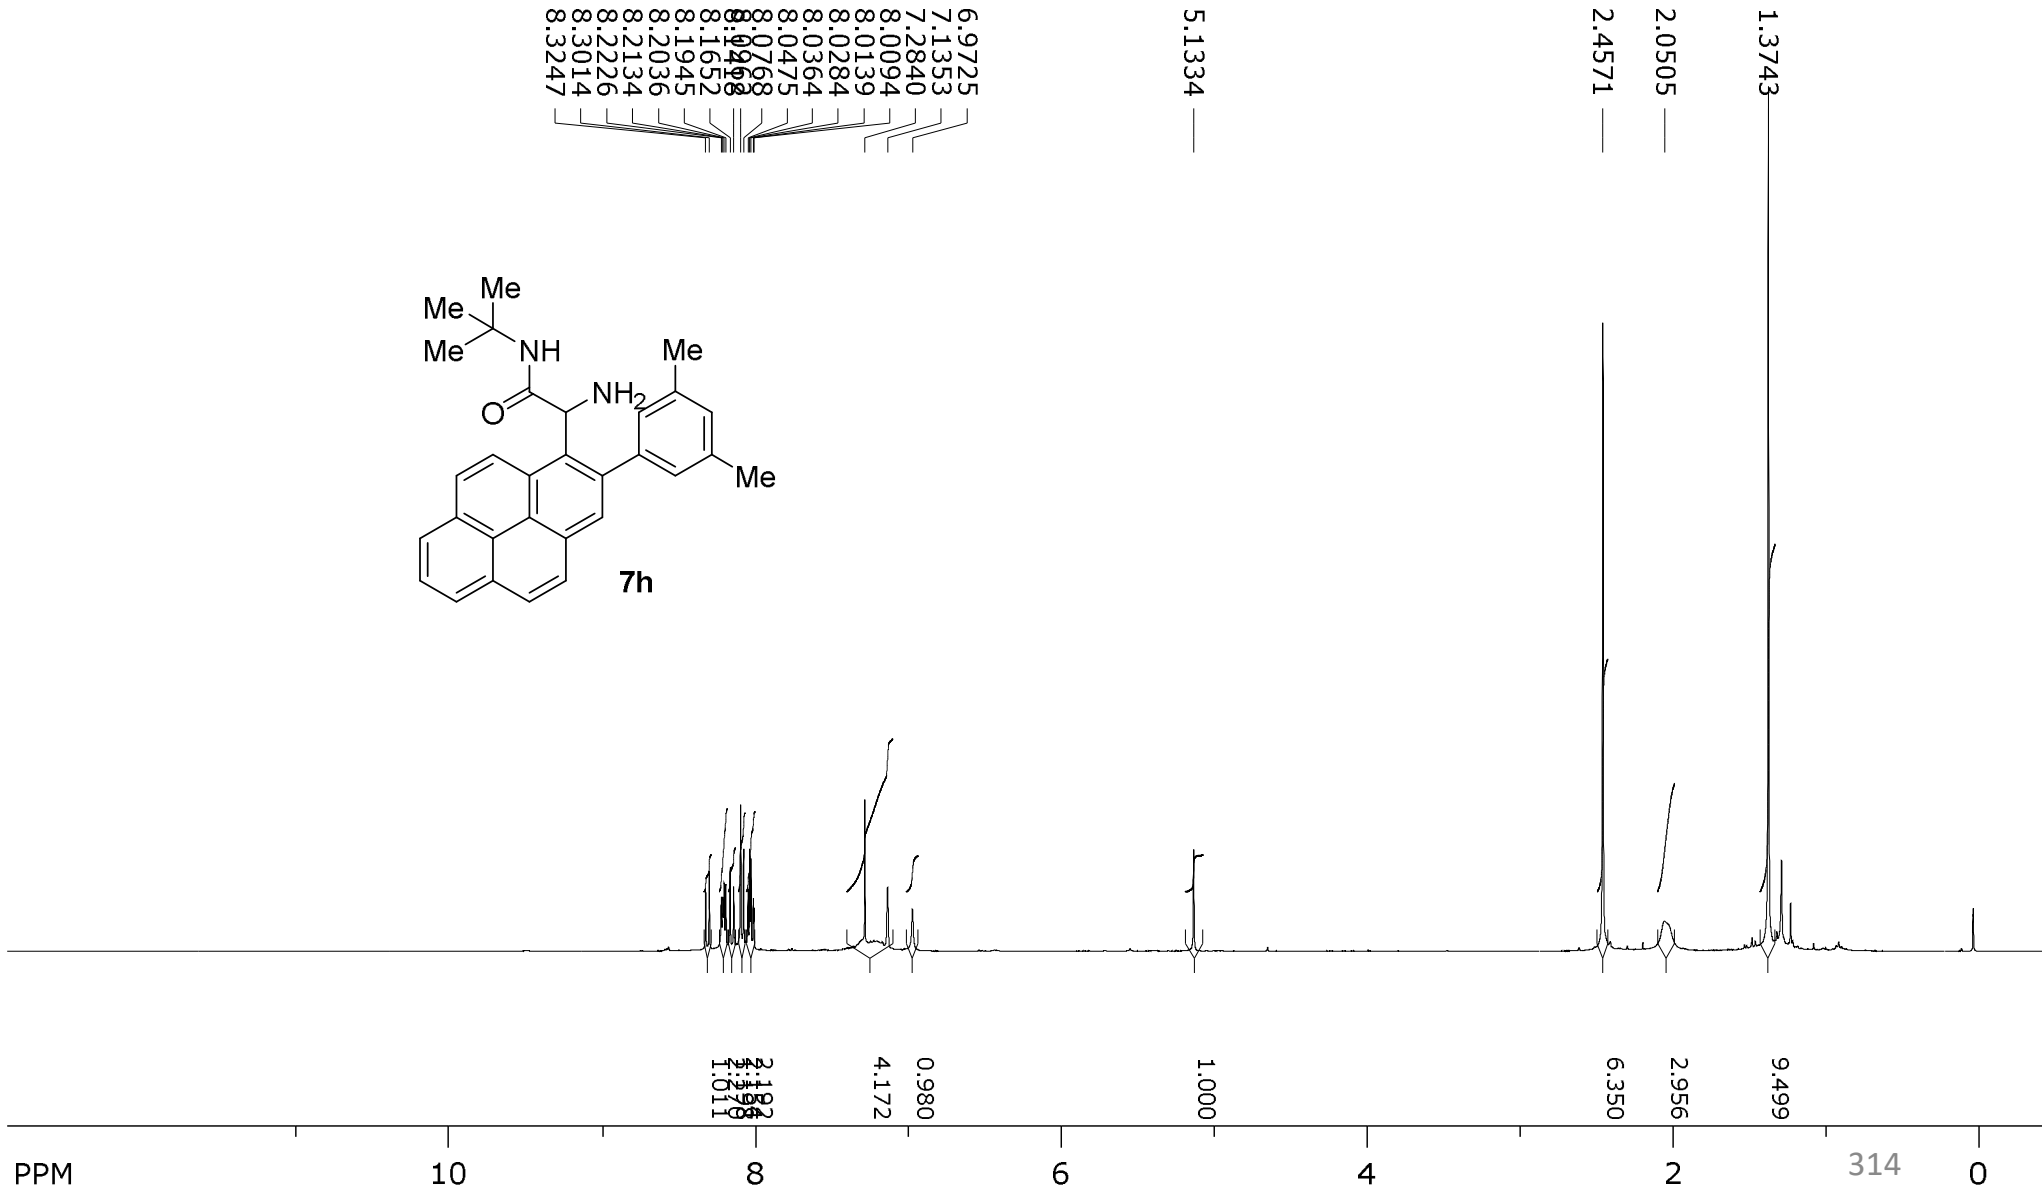

SpinWorks 4: AD-2190  
PROTON CDCl3 /opt/topspin3.5pl2/nmrdata nmrsu 29

8.0094  
8.0139  
8.0284  
8.0364  
8.0475  
8.0768  
8.0962  
8.1418  
8.1652  
8.1945  
8.2036  
8.2134  
8.2226  
8.3014  
8.3247

7.2840  
7.1353  
6.9725

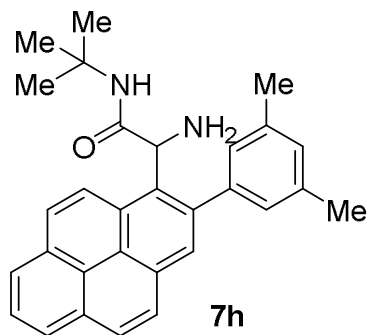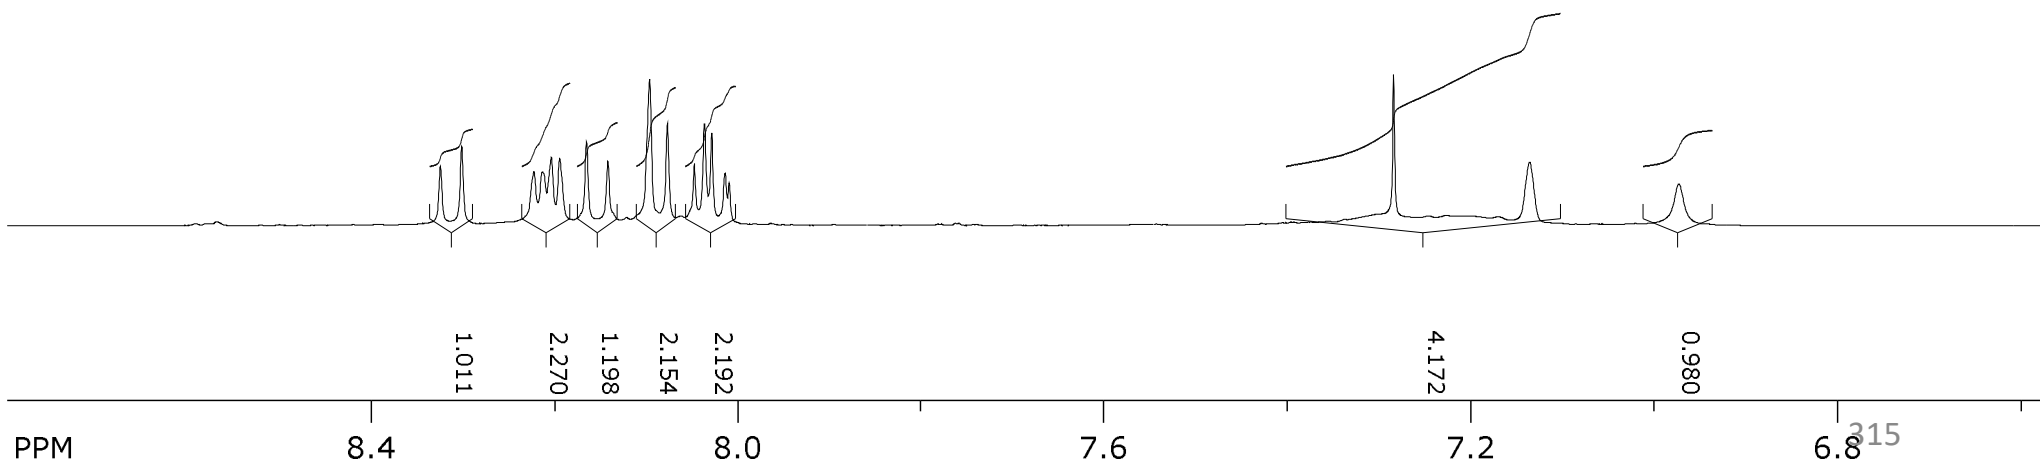

SpinWorks 4: AD 2190  
C13CPD256 CDCl3 /opt/topspin3.5pl2/nmrdata nmrsu 11

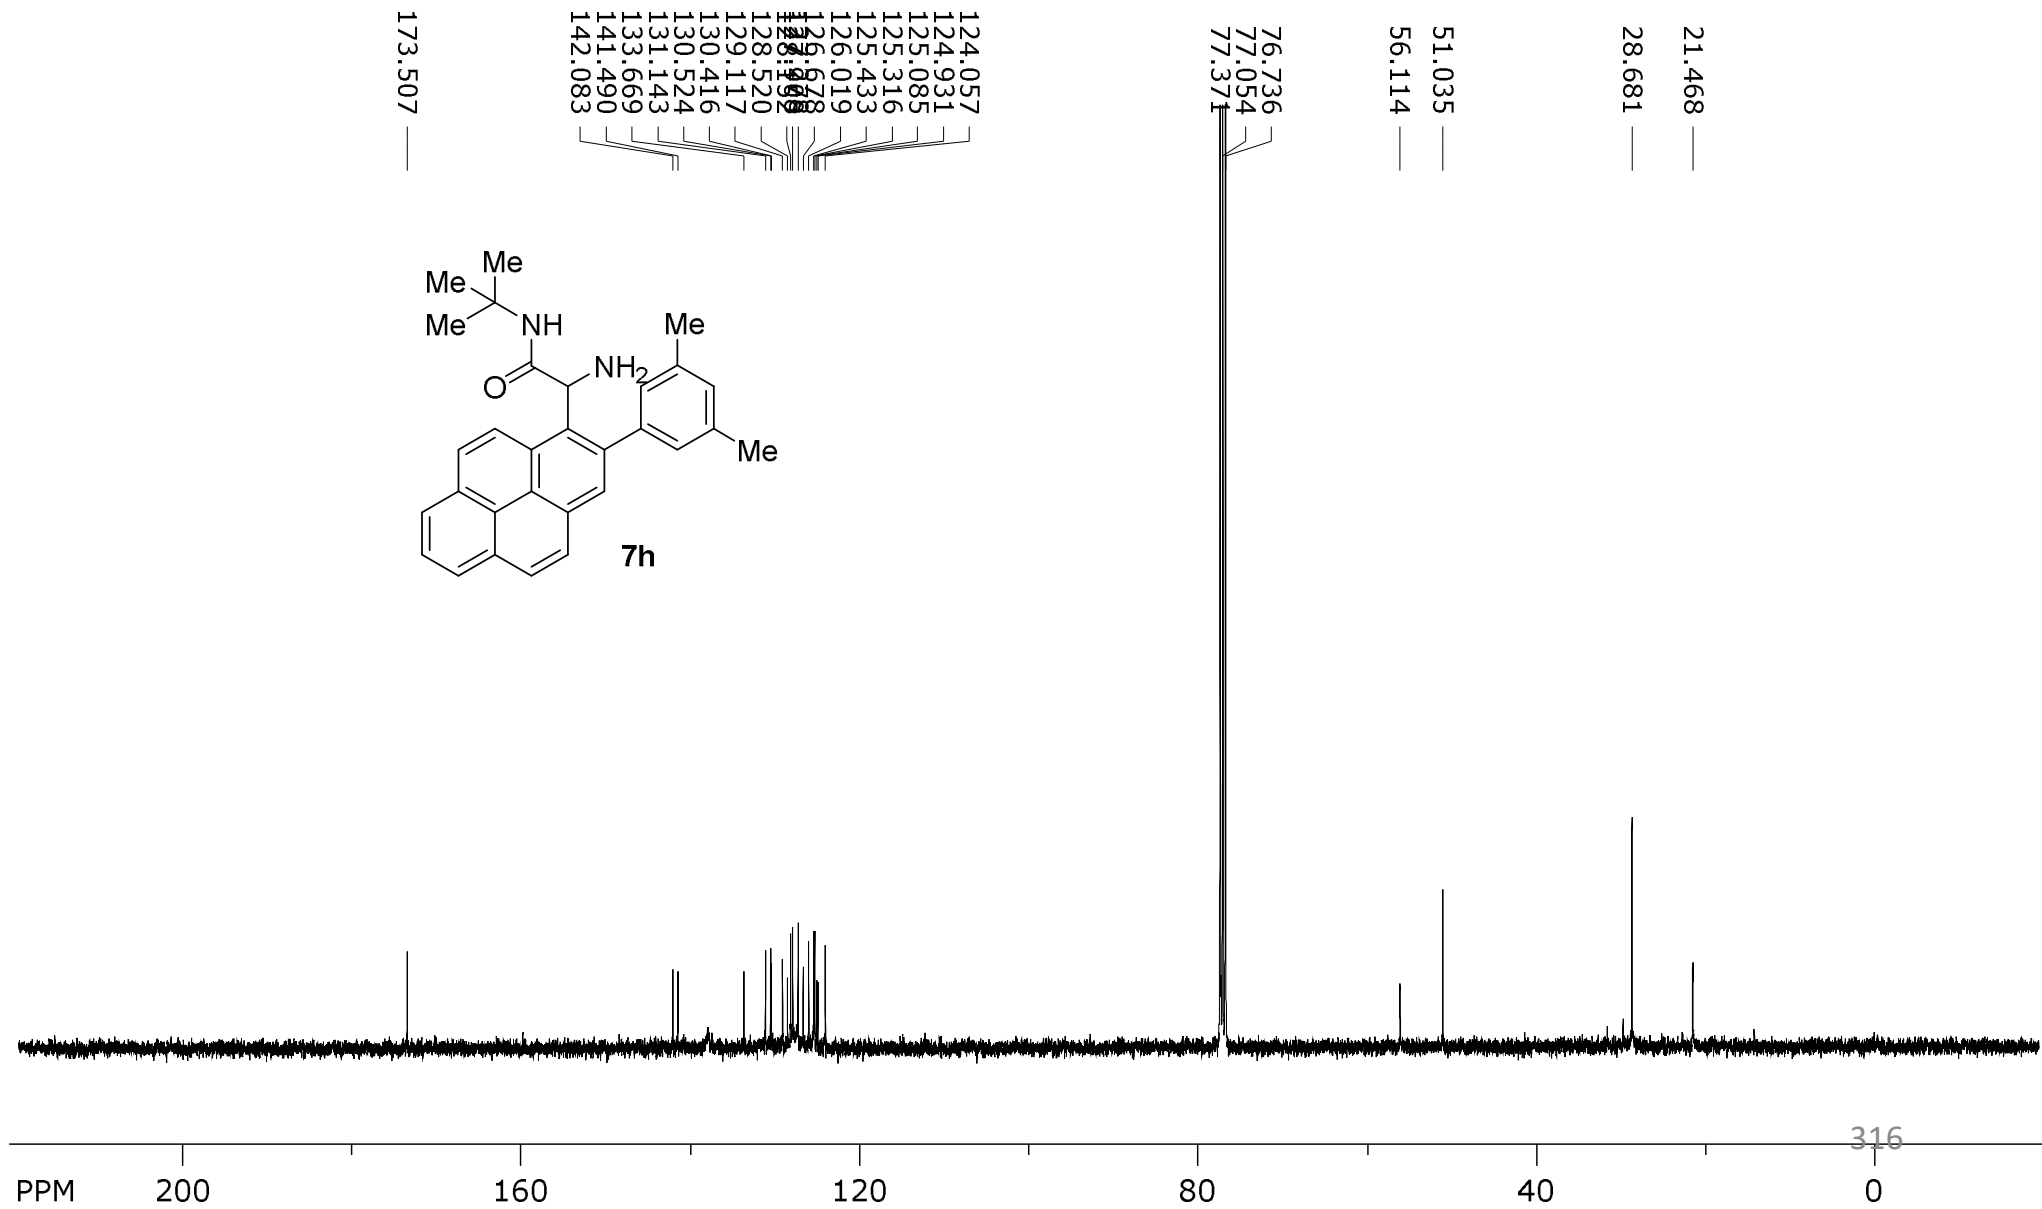

SpinWorks 4: AD 2190  
C13CPD256 CDCl3 /opt/topspin3.5pl2/nmrdata nmrsu 11

142.083 —  
141.490 —  
133.669 —  
131.143 —  
130.524 —  
130.416 —  
129.117 —  
128.520 —  
128.152 —  
127.908 —  
127.278 —  
126.678 —  
126.019 —  
125.433 —  
125.316 —  
125.085 —  
124.931 —  
124.057 —

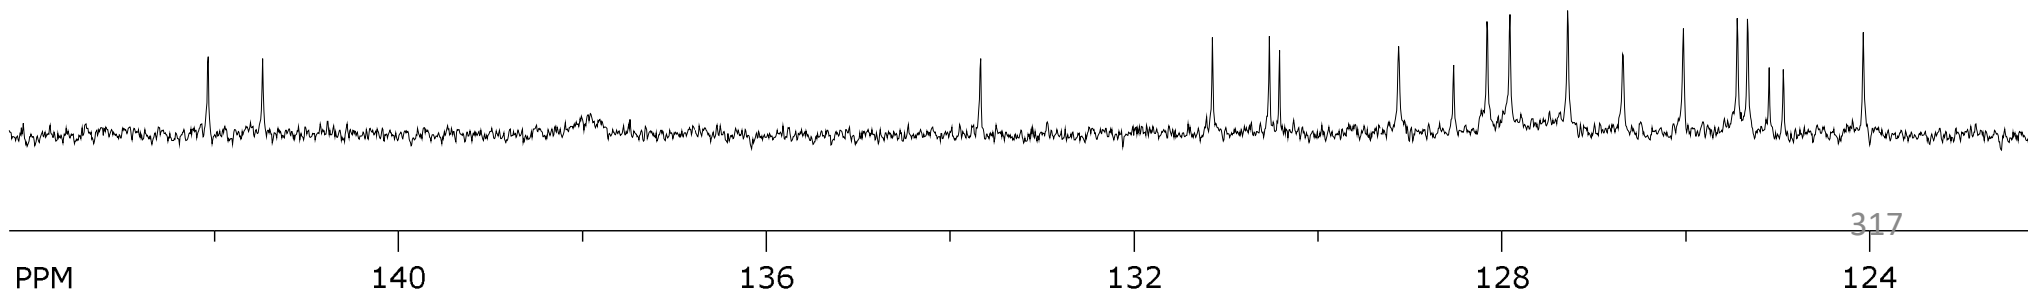

SpinWorks 4: AD 2181 RE  
PROTON CDCl3 /opt/topspin3.5pl2/nmrdata nmrsu 53

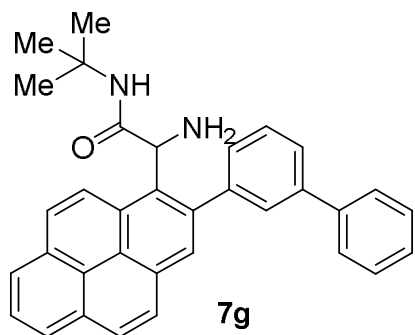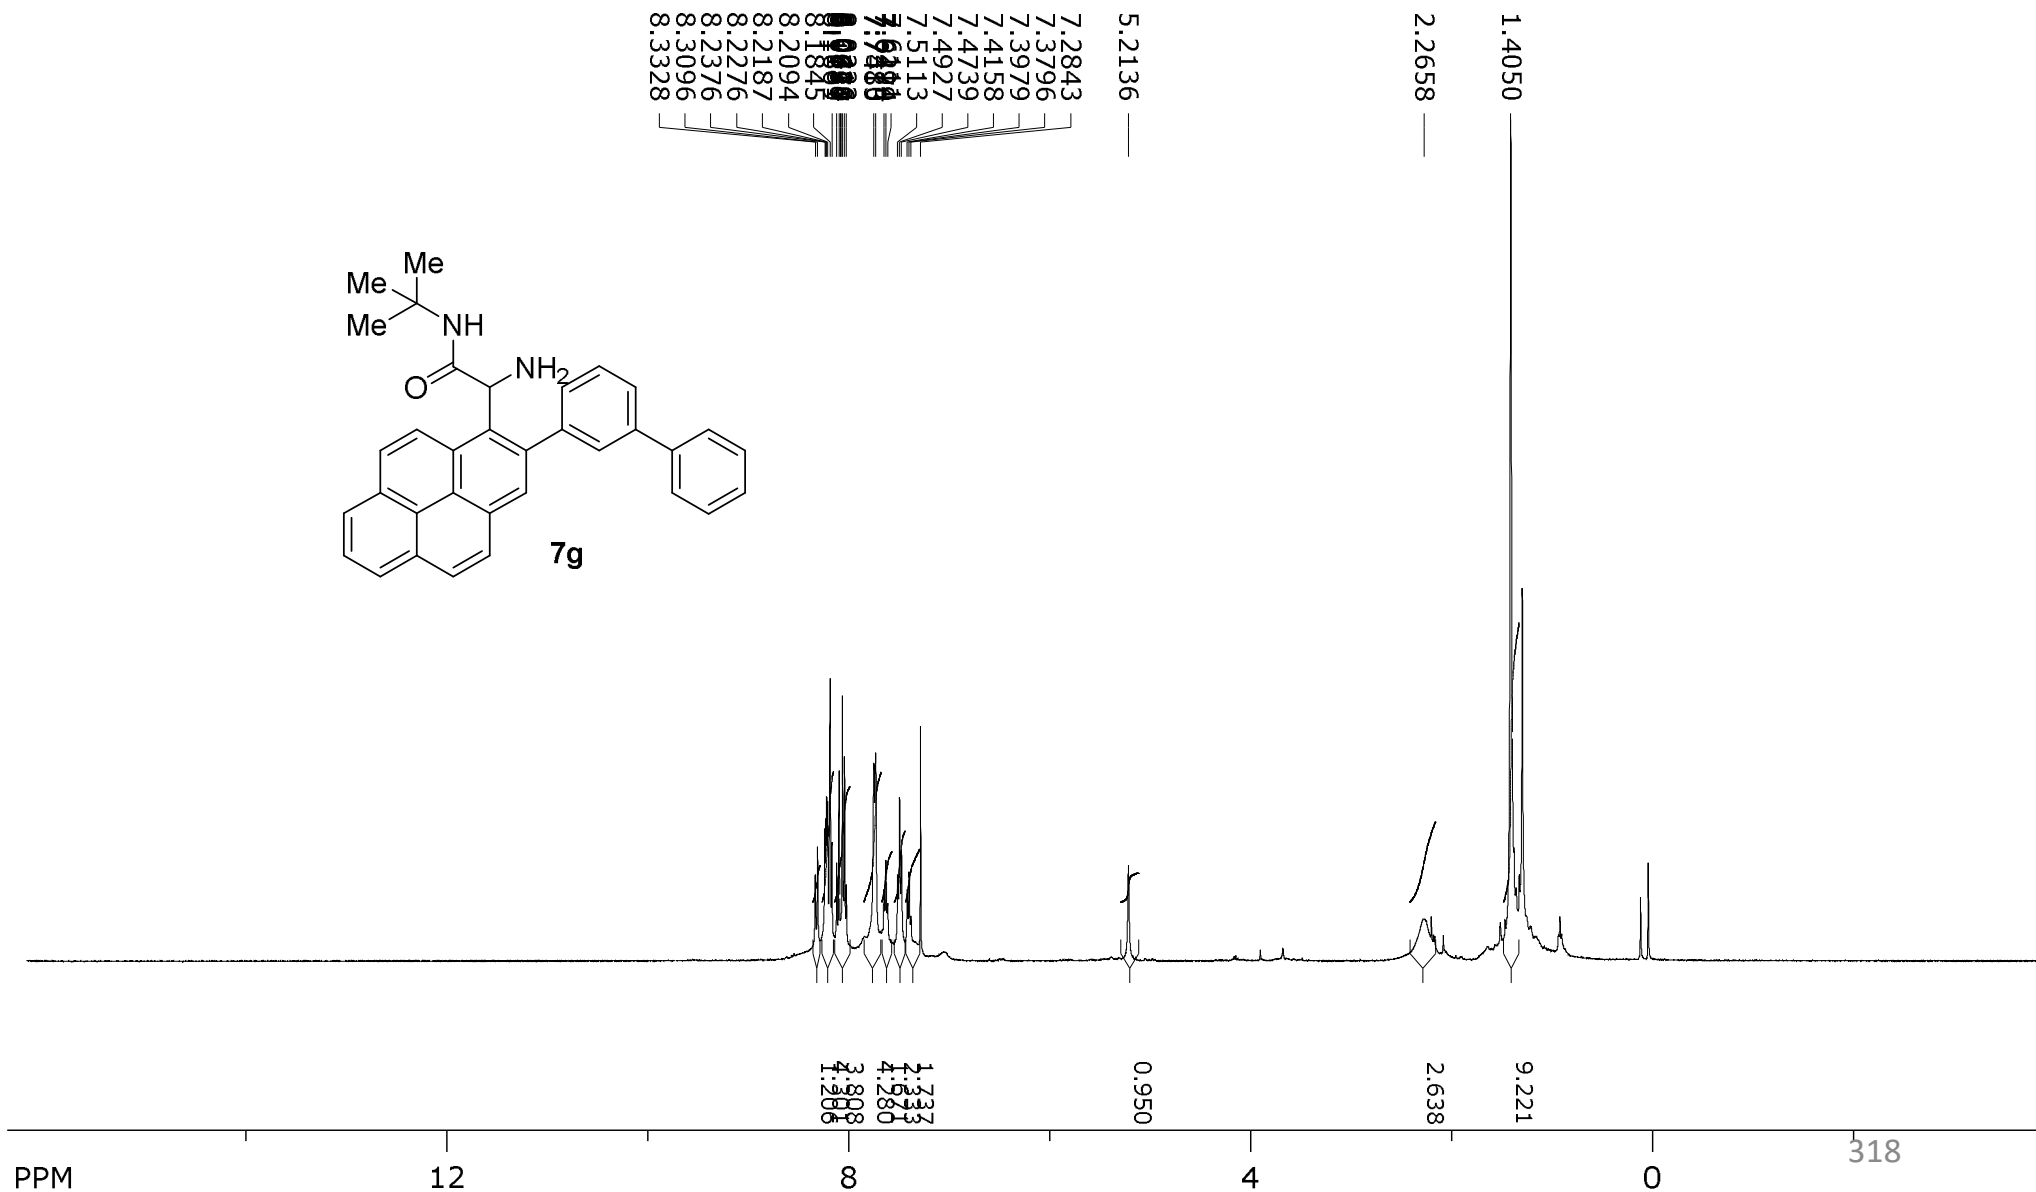

SpinWorks 4: AD 2181 RE  
PROTON CDCl3 /opt/topspin3.5pl2/nmrdata nmrsu 53

8.0233  
8.0416  
8.0620  
8.0774  
8.0833  
8.0957  
8.1181  
8.1669  
8.1845  
8.2094  
8.2187  
8.2276  
8.2376  
8.3096  
8.3328  
  
7.7310  
7.7485  
  
7.6111  
7.6294  
7.6479  
  
7.5113  
7.4927  
7.4739  
7.4158  
7.3979  
7.3796  
  
7.2843

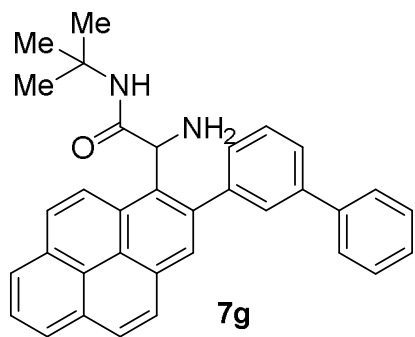

7g

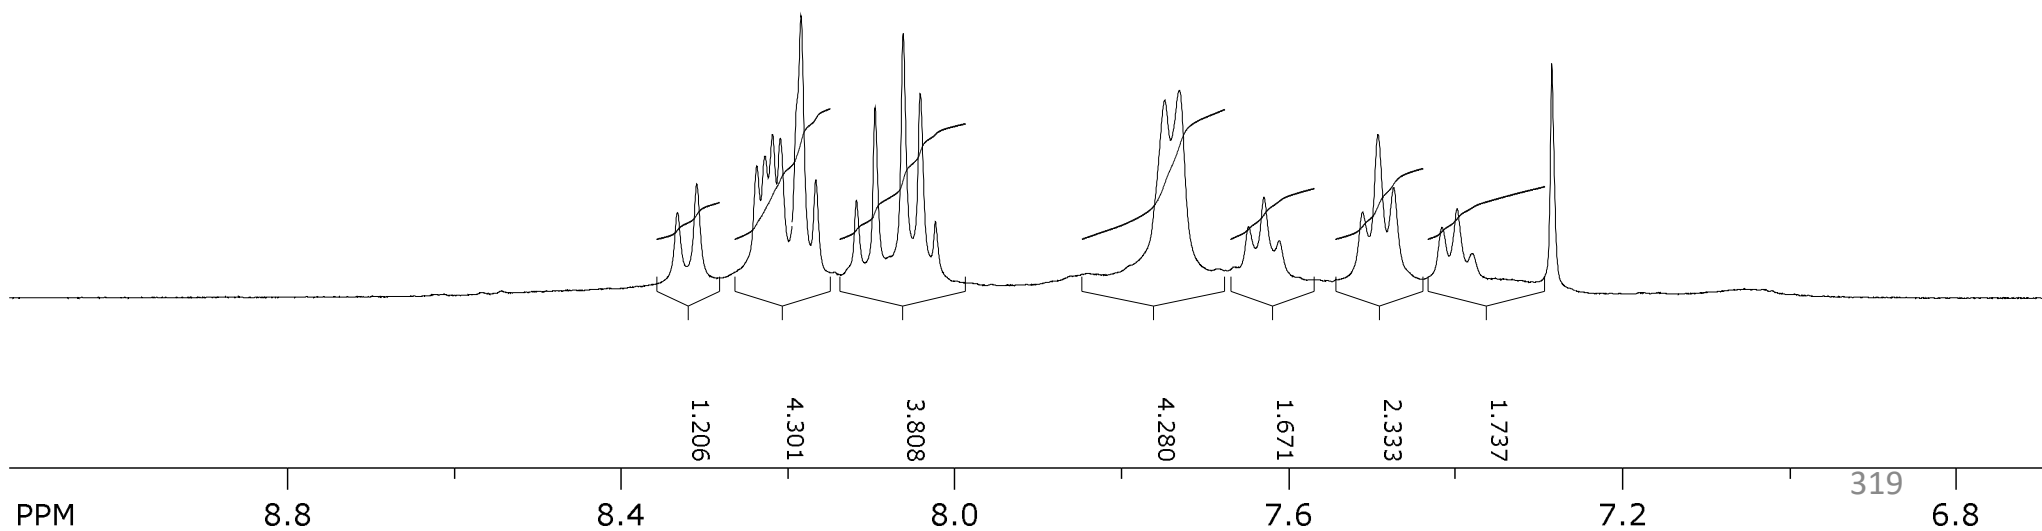

SpinWorks 4: AD 2181 RE  
C13CPD256 CDCl3 /opt/topspin3.5pl2/nmrdata nmrsu 9

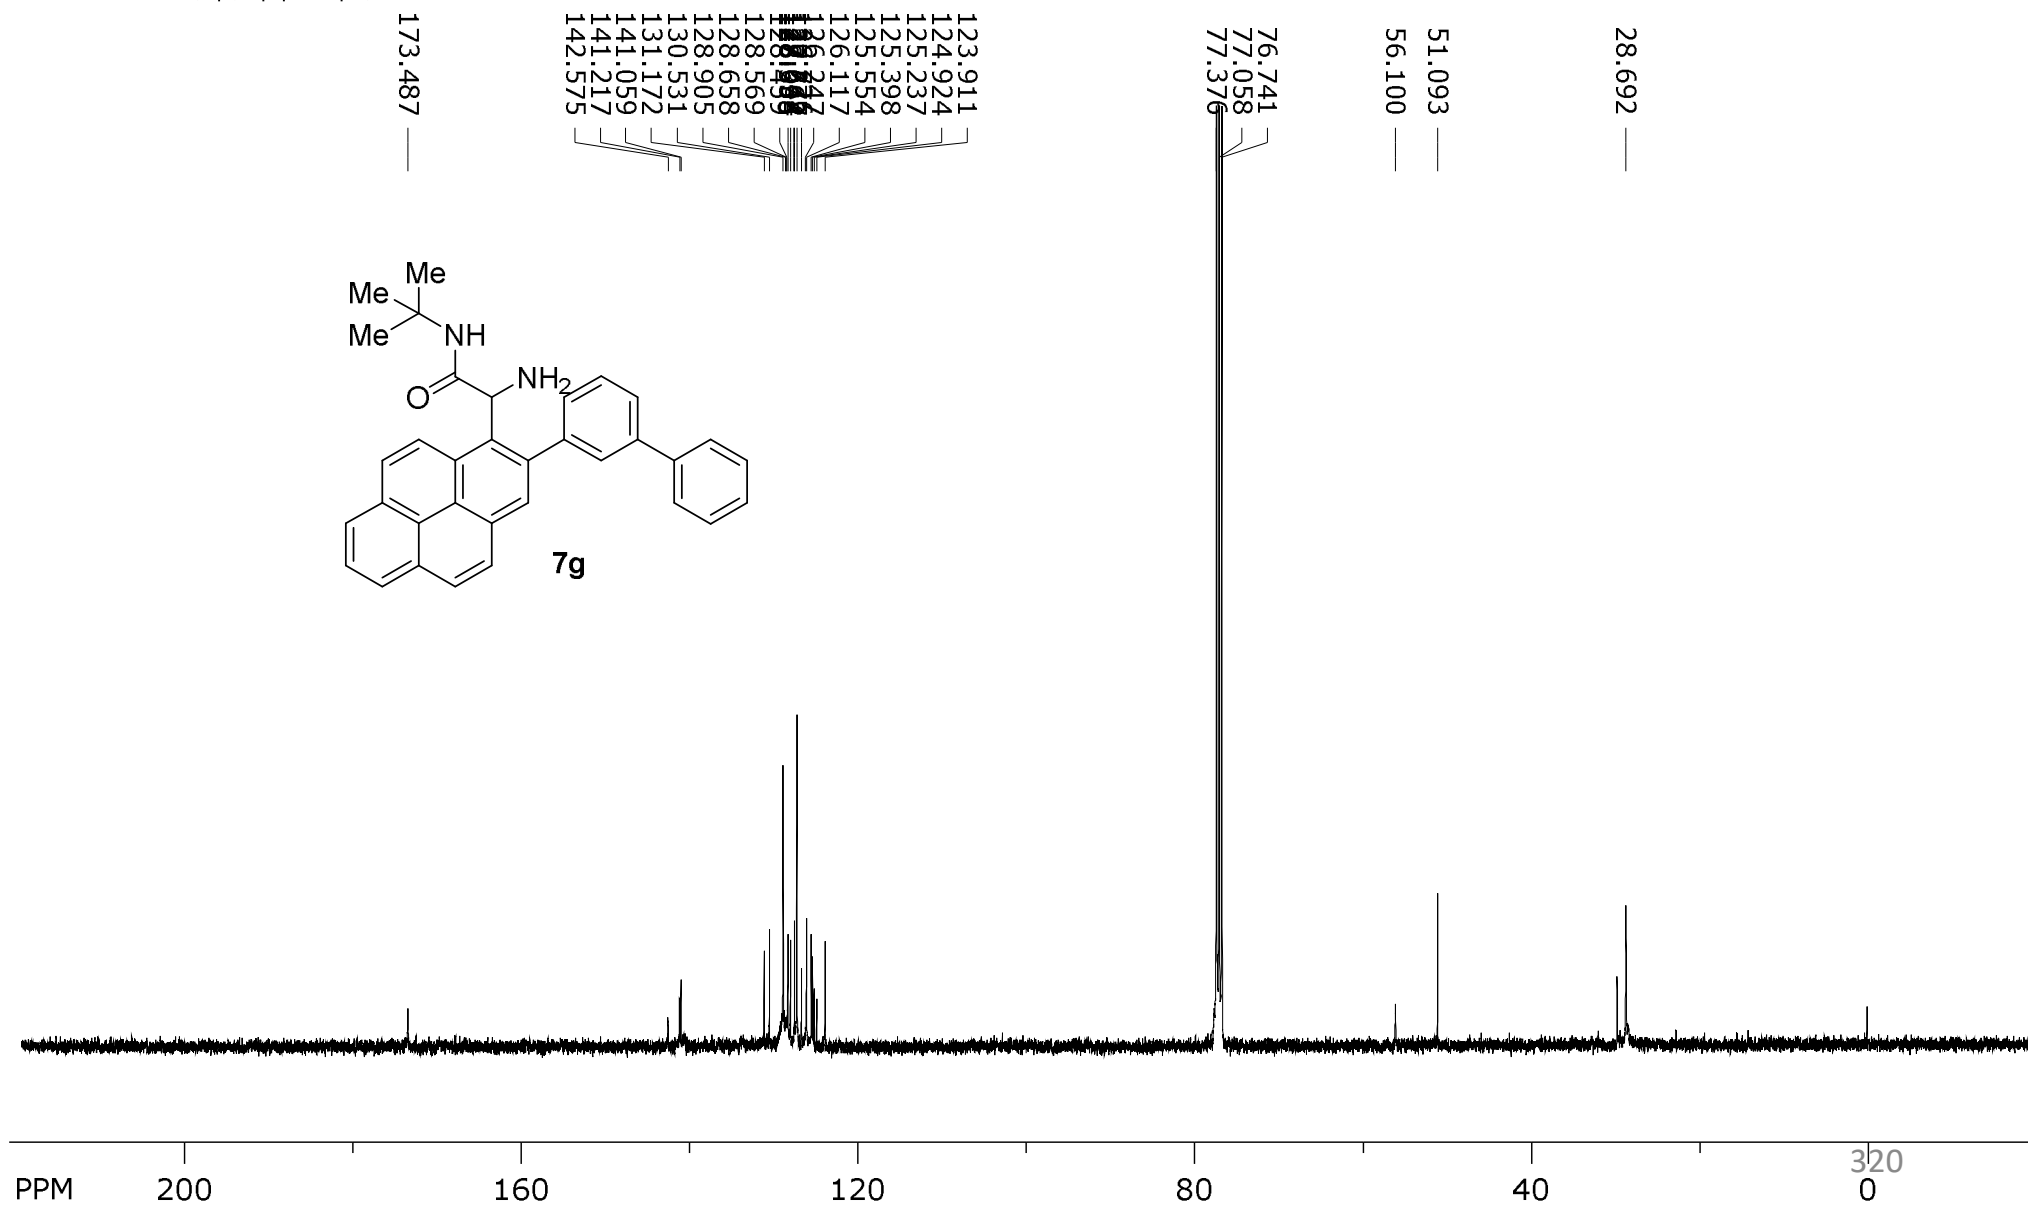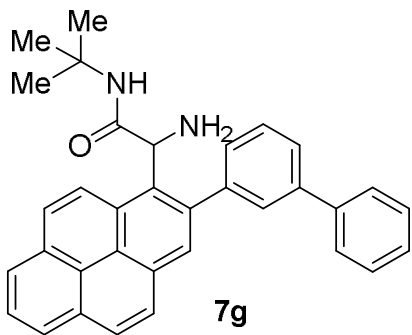



SpinWorks 4: AD 2181 RE  
C13CPD256 CDCl3 /opt/topspin3.5pl2/nmrdata nmrsu 9

141.059  
141.217  
142.575

123.911  
124.924  
125.237  
125.398  
125.554  
126.117  
126.247  
126.726  
127.277  
127.564  
127.642  
128.034  
128.335  
128.459  
128.569  
128.658  
128.905  
130.531  
131.172



7g

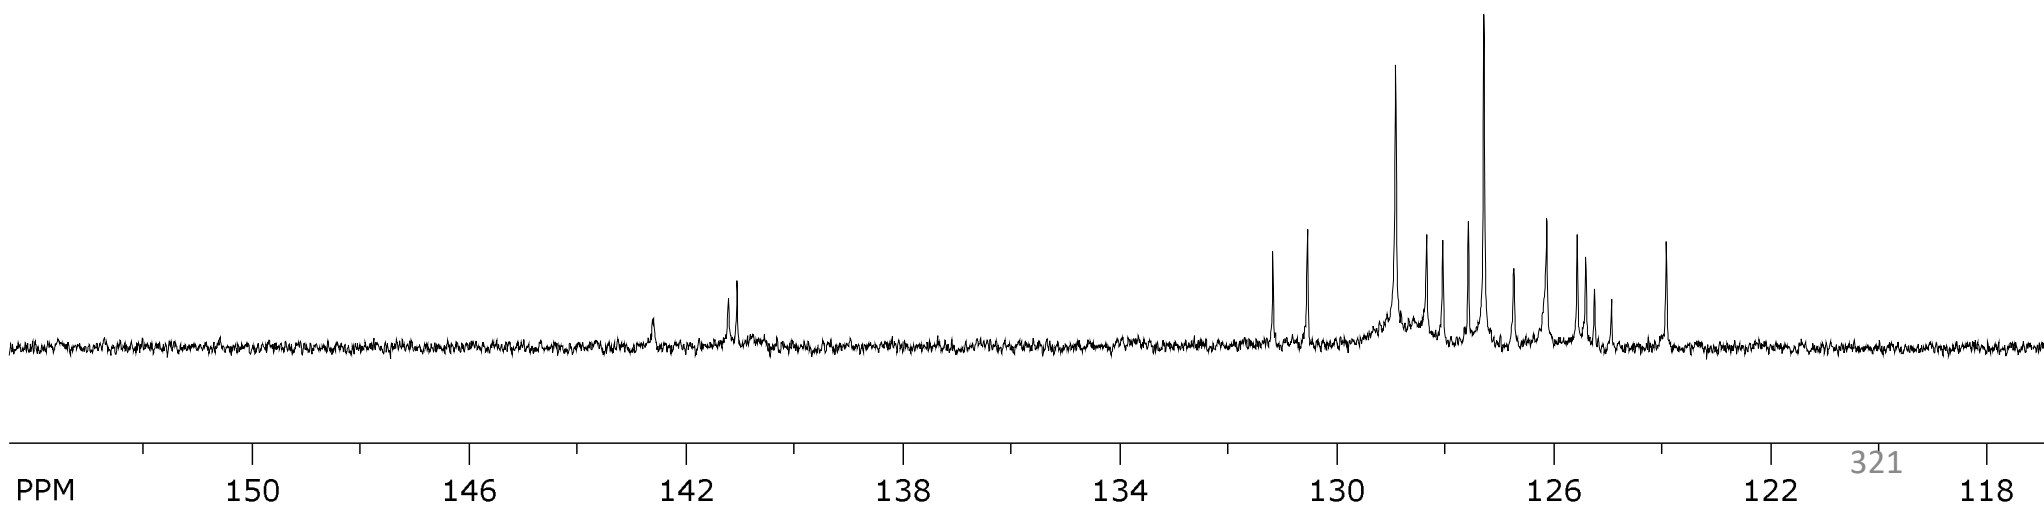

SpinWorks 4: AD 1955  
PROTON CDCl3 /opt/topspin3.5pl2/nmrdata nmrsu 10

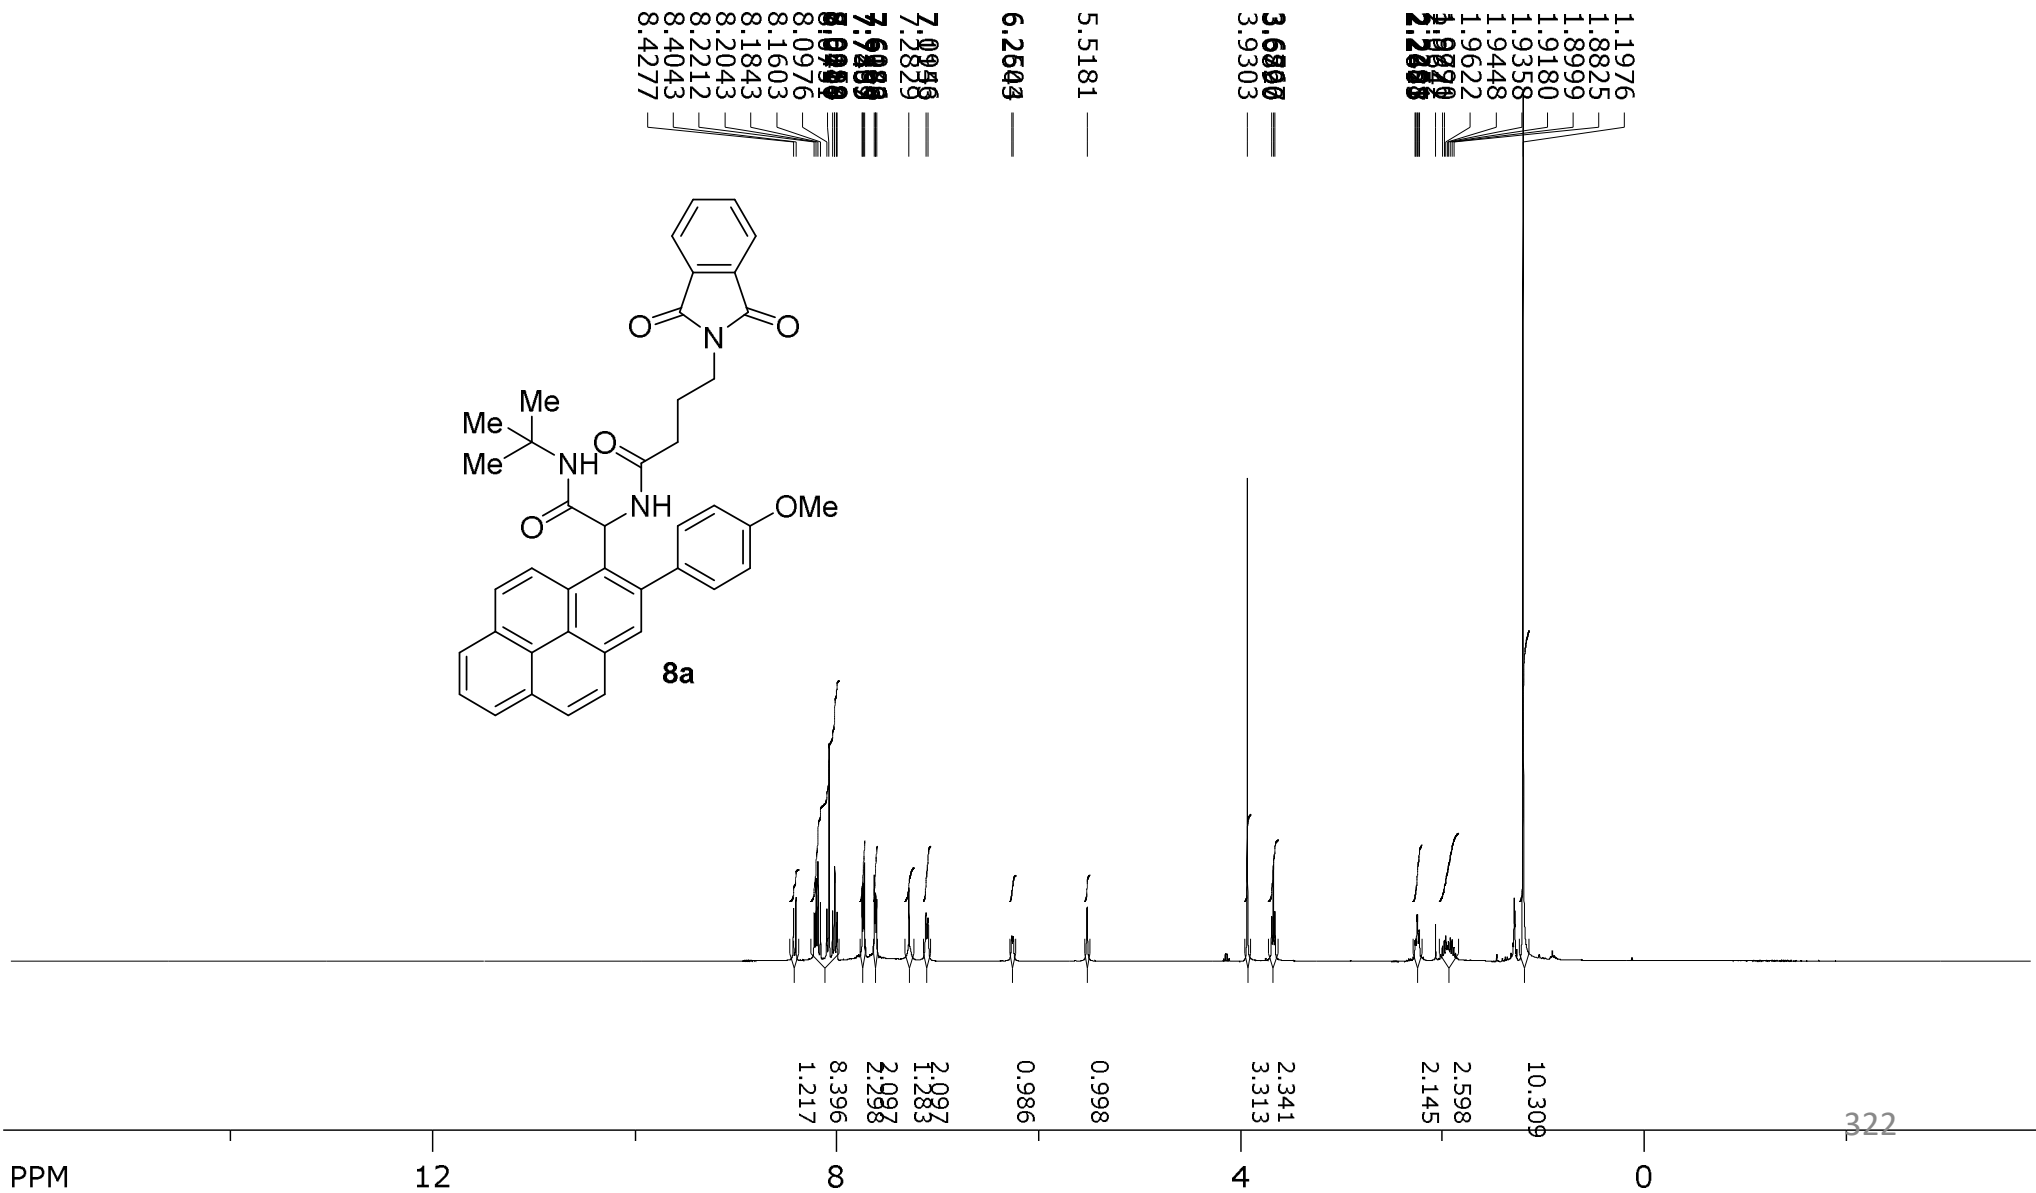

SpinWorks 4: AD 1955  
PROTON CDCl3 /opt/topspin3.5pl2/nmrdata nmrsu 10

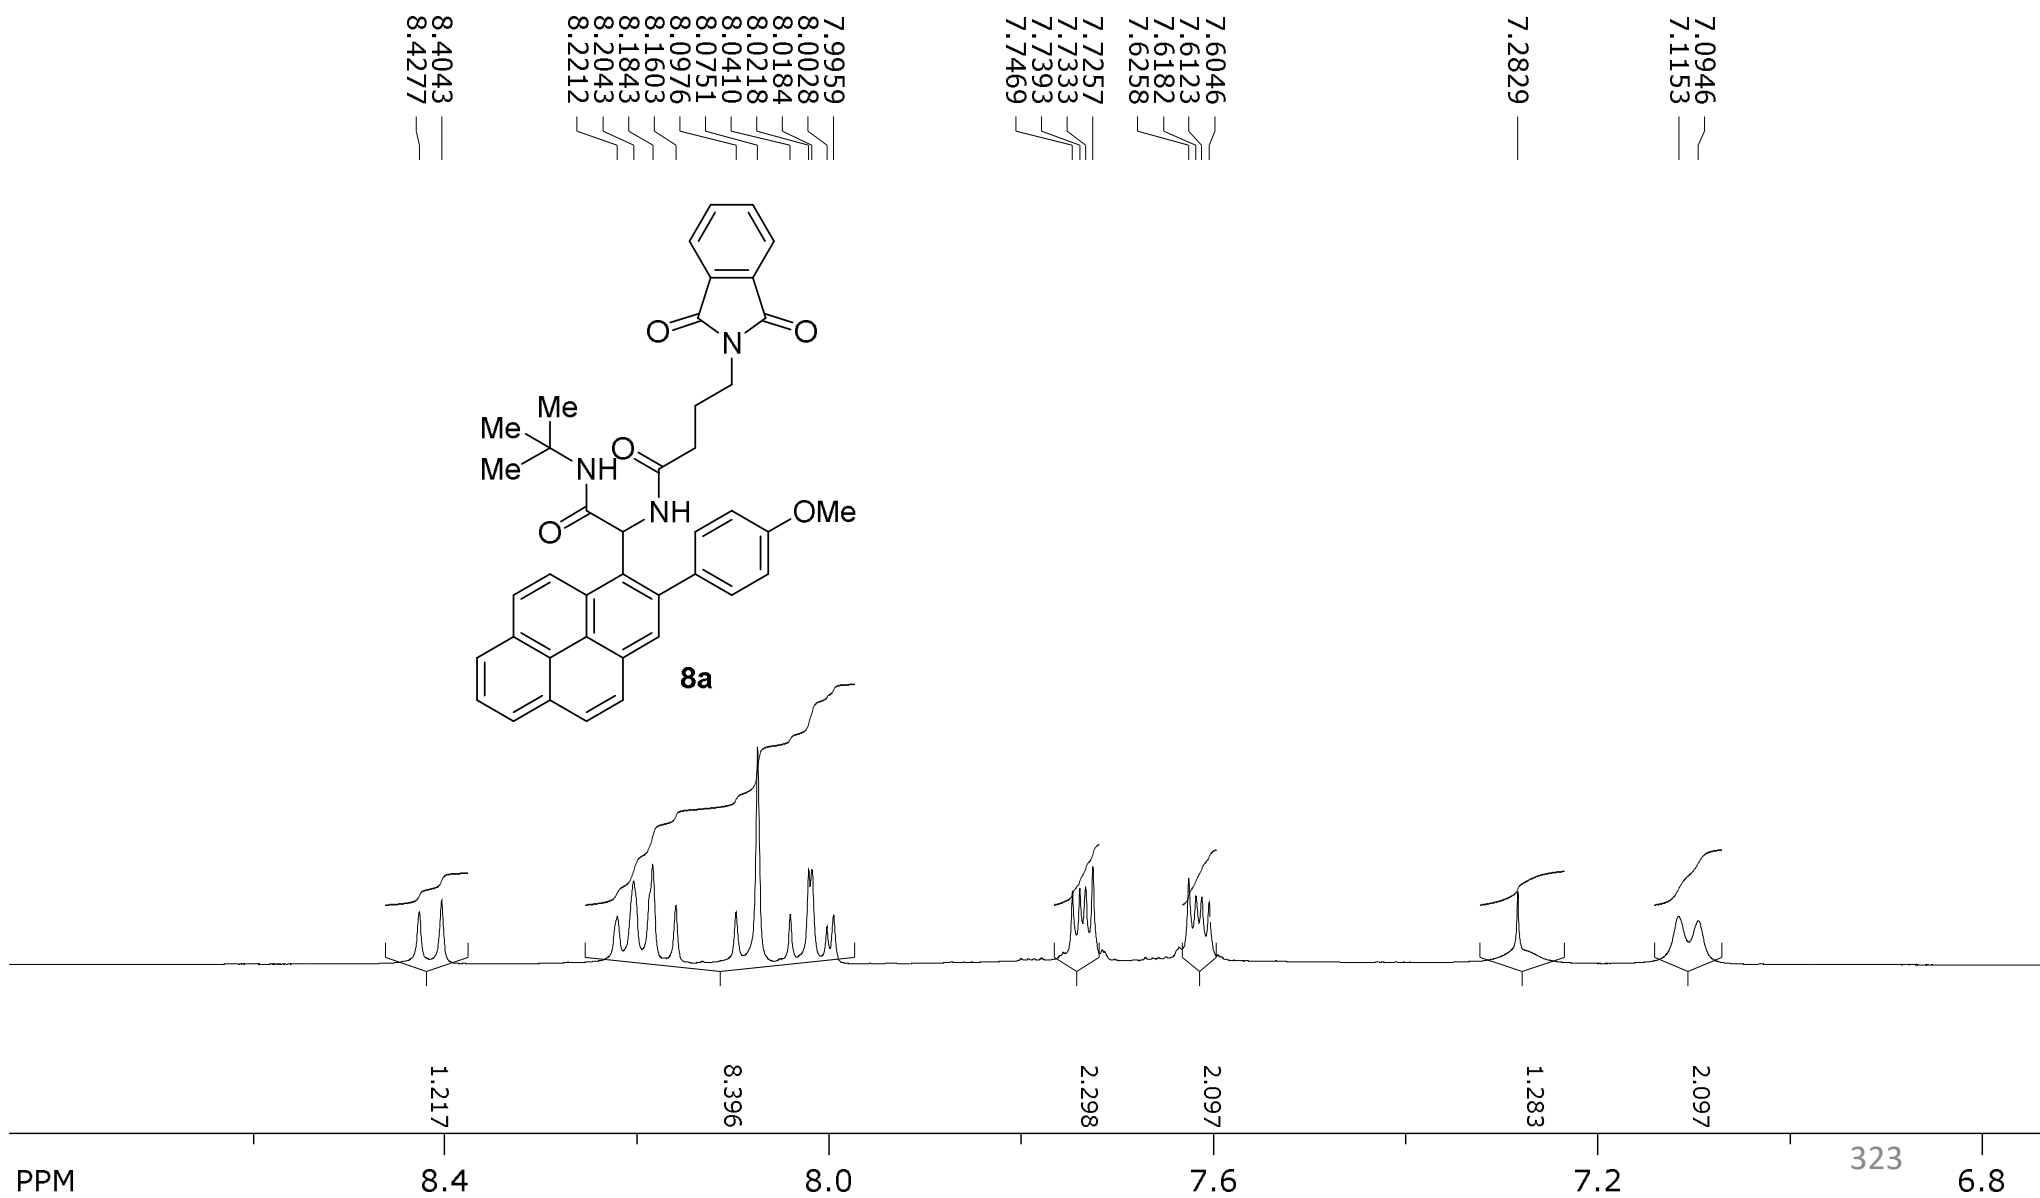

SpinWorks 4: AD 1955  
PROTON CDCl3 /opt/topspin3.5pl2/nmrdata nmrsu 10

6.2504  
6.2643  
—  
—

5.5181  
—

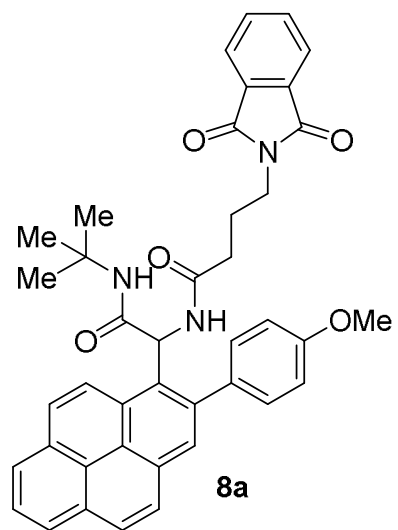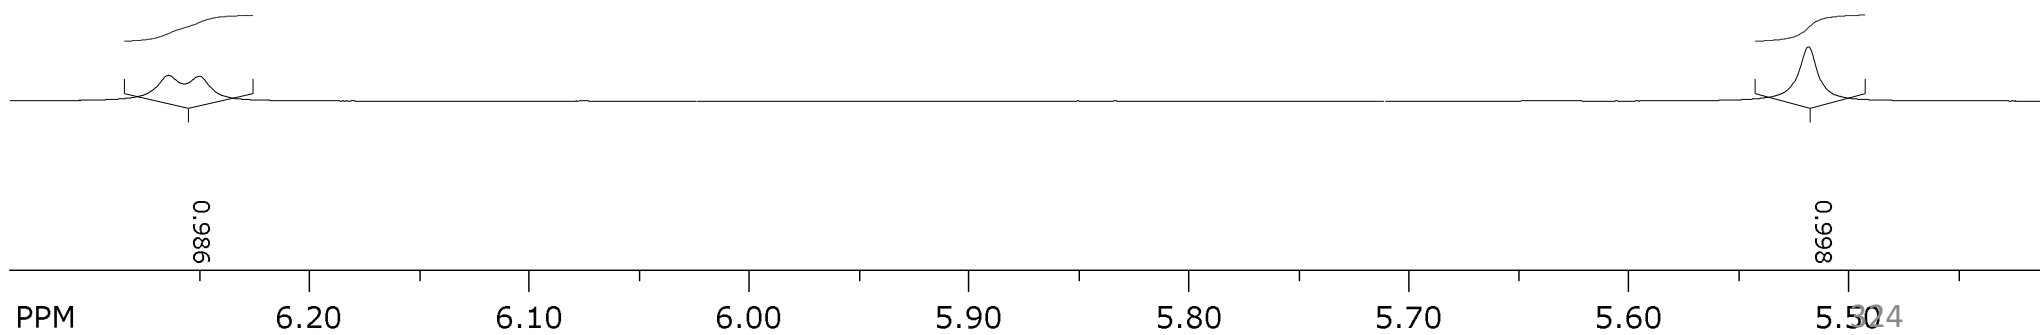

SpinWorks 4: AD 1955  
PROTON CDCl3 /opt/topspin3.5pl2/nmrdata nmrsu 10

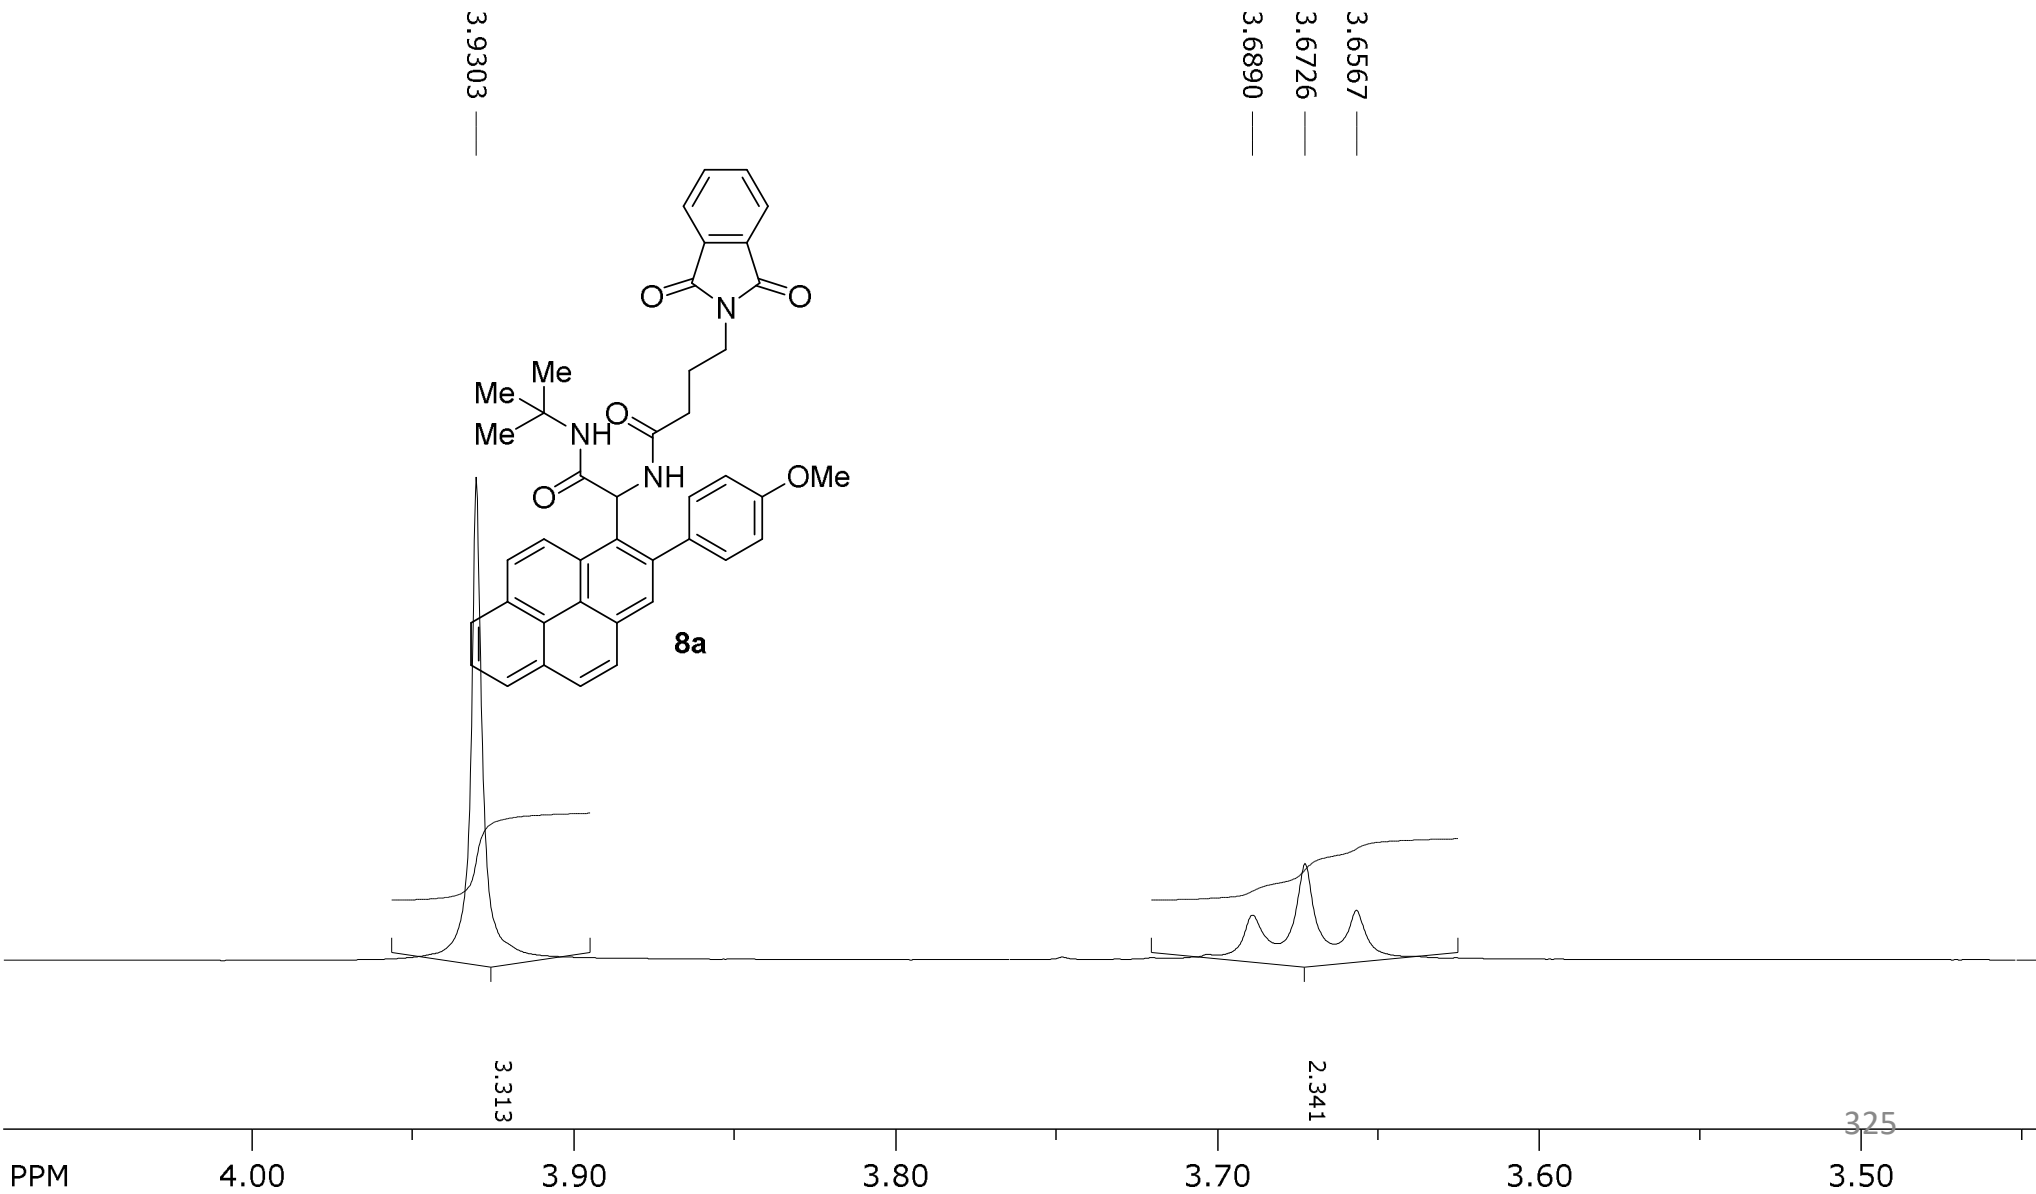

SpinWorks 4: AD 1955  
PROTON CDCl3 /opt/topspin3.5pl2/nmrdata nmrsu 10

2.2251  
2.2291  
2.2428  
2.2485  
2.2603  
2.2677  
2.0642  
1.8825  
1.8999  
1.9180  
1.9358  
1.9448  
1.9622  
1.9790  
1.9971

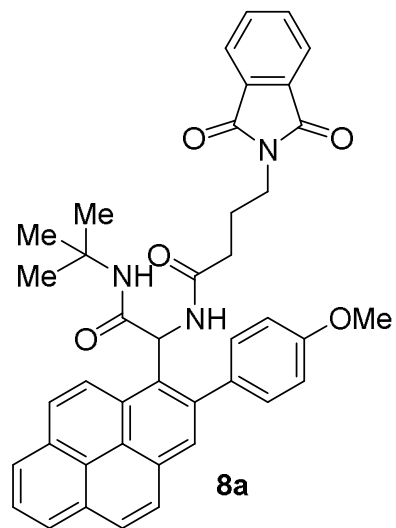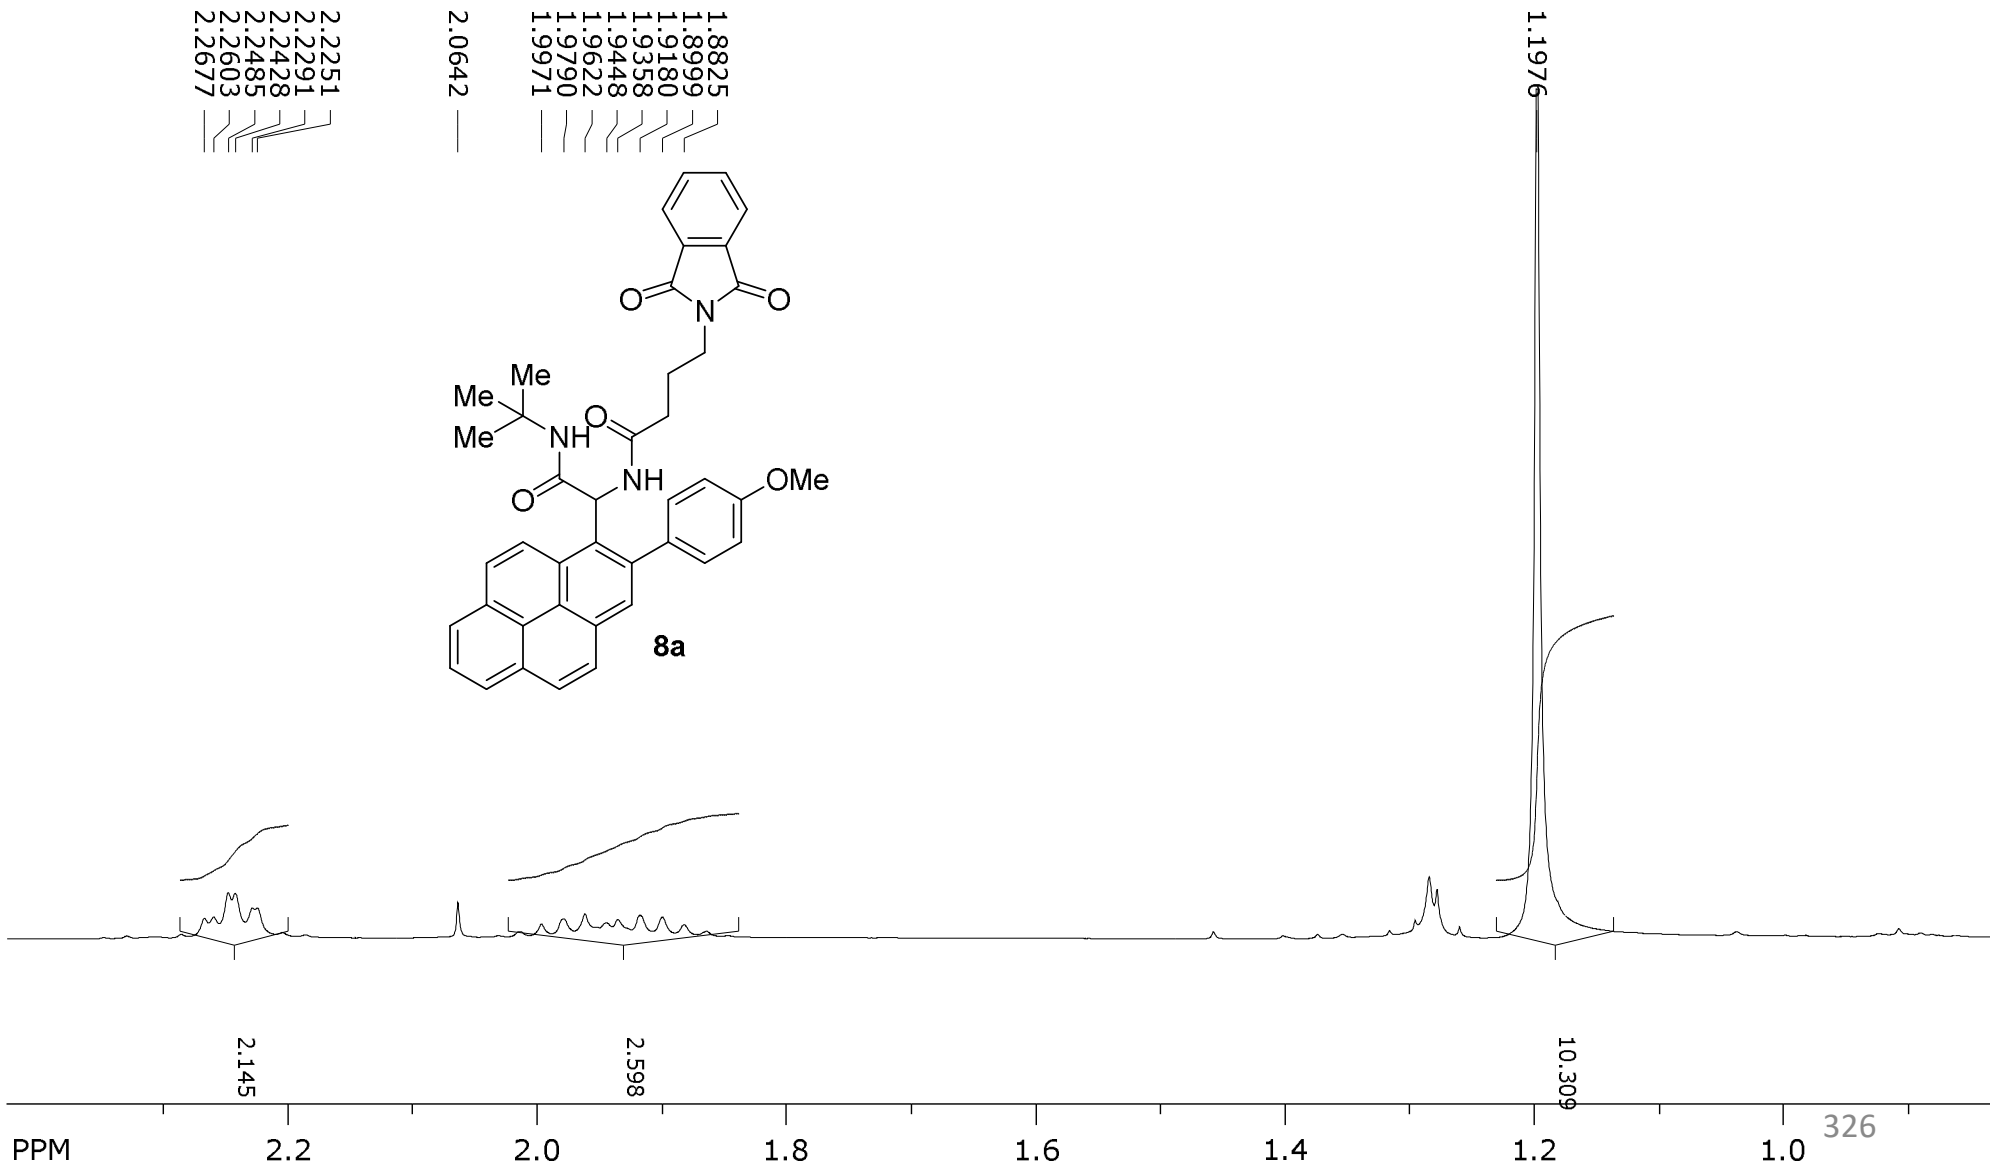

SpinWorks 4: AD 1955  
C13CPD256 CDCl3 /opt/topspin3.5pl2/nmrdata nmrsu 10

168.433  
169.700  
171.160

159.258

140.943  
133.884  
133.834  
131.895  
131.115  
130.888  
130.413  
129.708  
129.149  
129.091  
125.641  
125.499  
124.919  
124.674  
123.758  
123.144  
113.933

51.755  
55.048  
55.395

37.180  
33.596  
28.478  
24.814

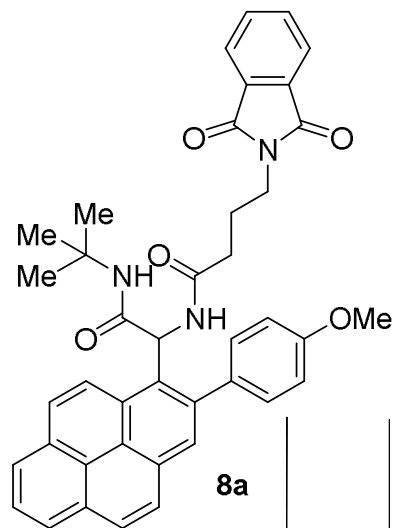

PPM

160

120

80

40

327

SpinWorks 4: AD 1955  
C13CPD256 CDCl3 /opt/topspin3.5pl2/nmrdata nmrsu 10

140.943

133.834  
133.884

131.895  
130.413  
130.888  
131.115

129.708  
128.931  
128.542  
128.222  
127.505  
127.202

126.149  
125.641  
125.499  
124.919  
124.674  
123.758  
123.144

113.933

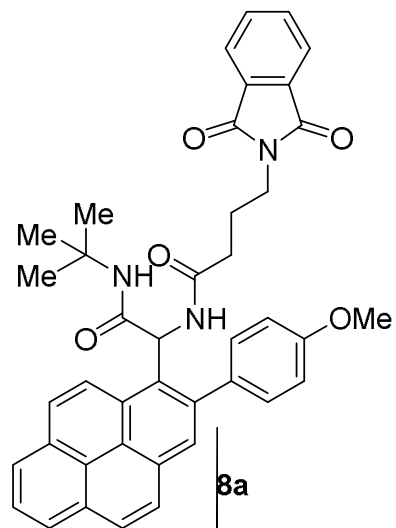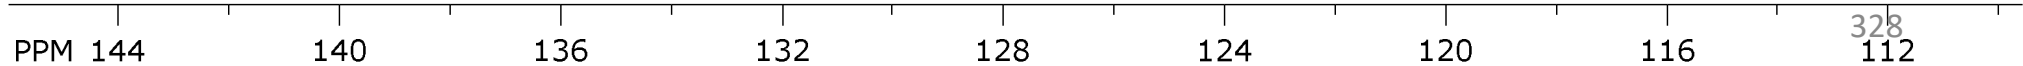



SpinWorks 4: AD-2121  
PROTON CDCl3 /opt/topspin3.5pl2/nmrdata nmrsu 20

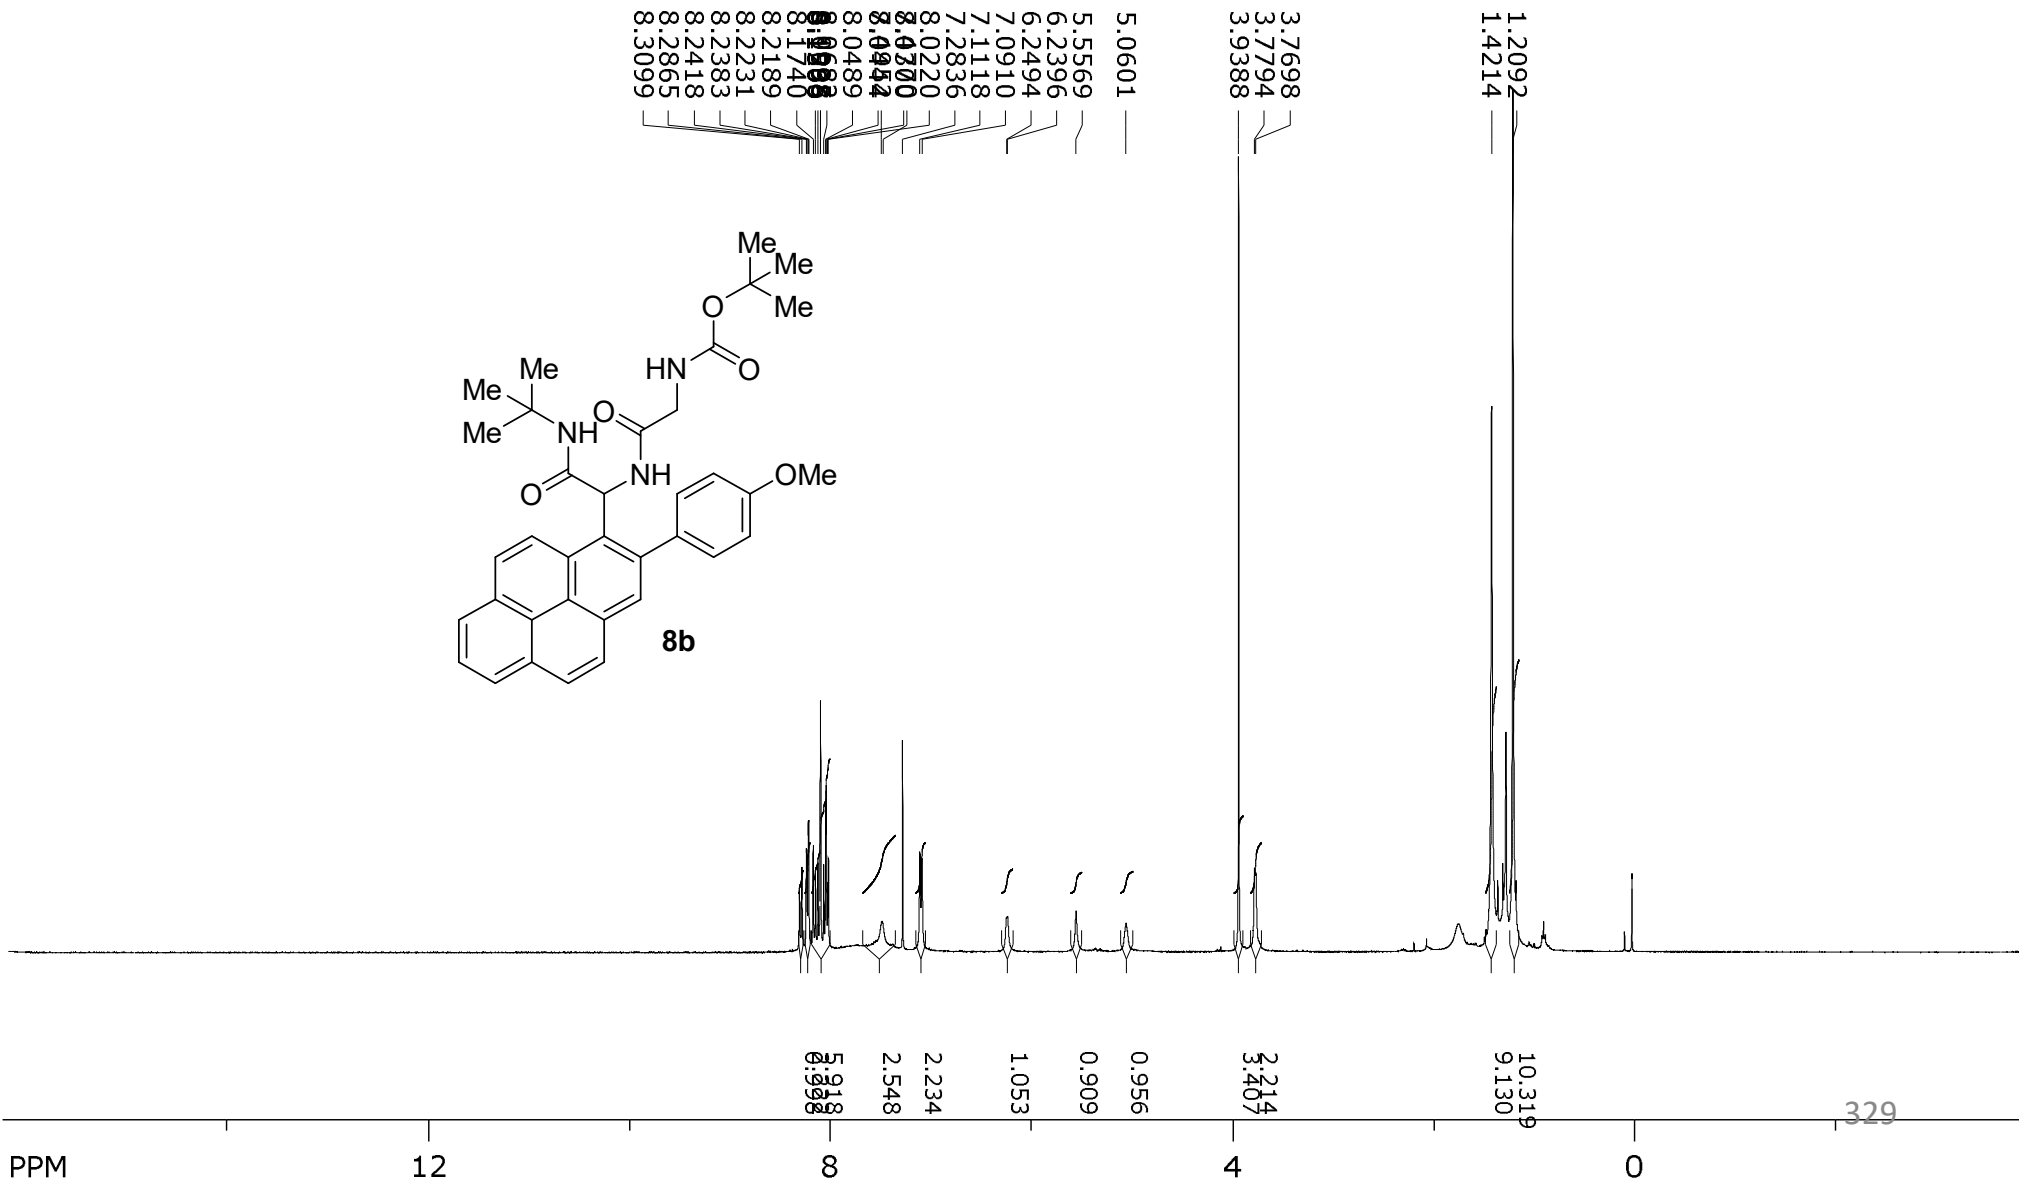

SpinWorks 4: AD-2121  
PROTON CDCl3 /opt/topspin3.5pl2/nmrdata nmrsu 20

8.0220  
8.0300  
8.0444  
8.0489  
8.0682  
8.0995  
8.1038  
8.1265  
8.1506  
8.1740  
8.2189  
8.2231  
8.2383  
8.2418  
8.2865  
8.3099

7.4770  
7.4952

7.2836

7.0910  
7.1118

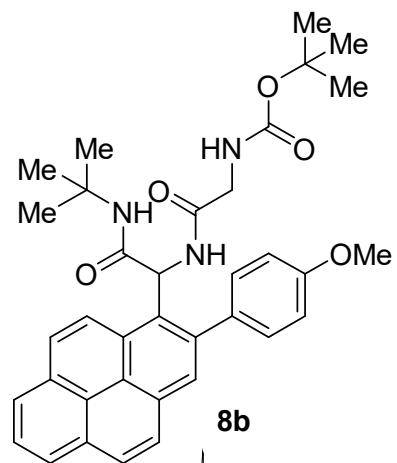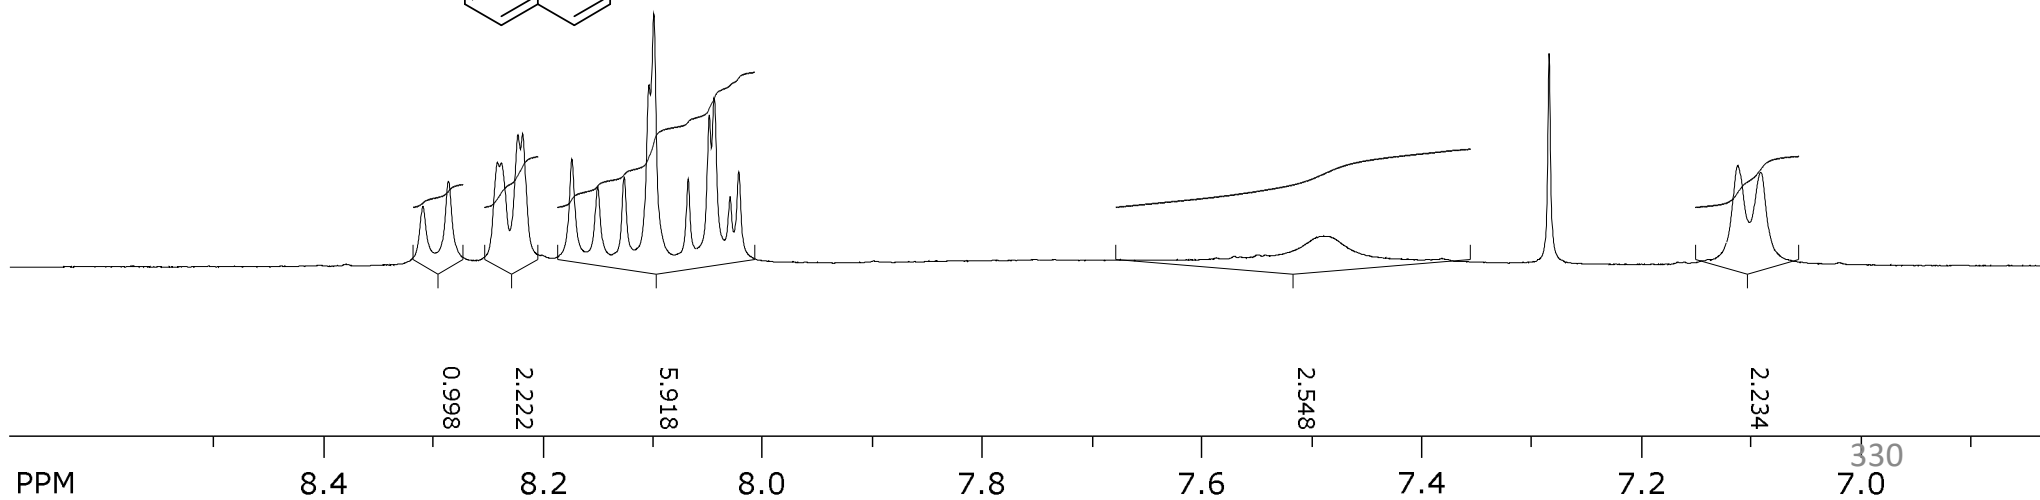

SpinWorks 4: AD-2121  
PROTON CDCl3 /opt/topspin3.5pl2/nmrdata nmrsu 20

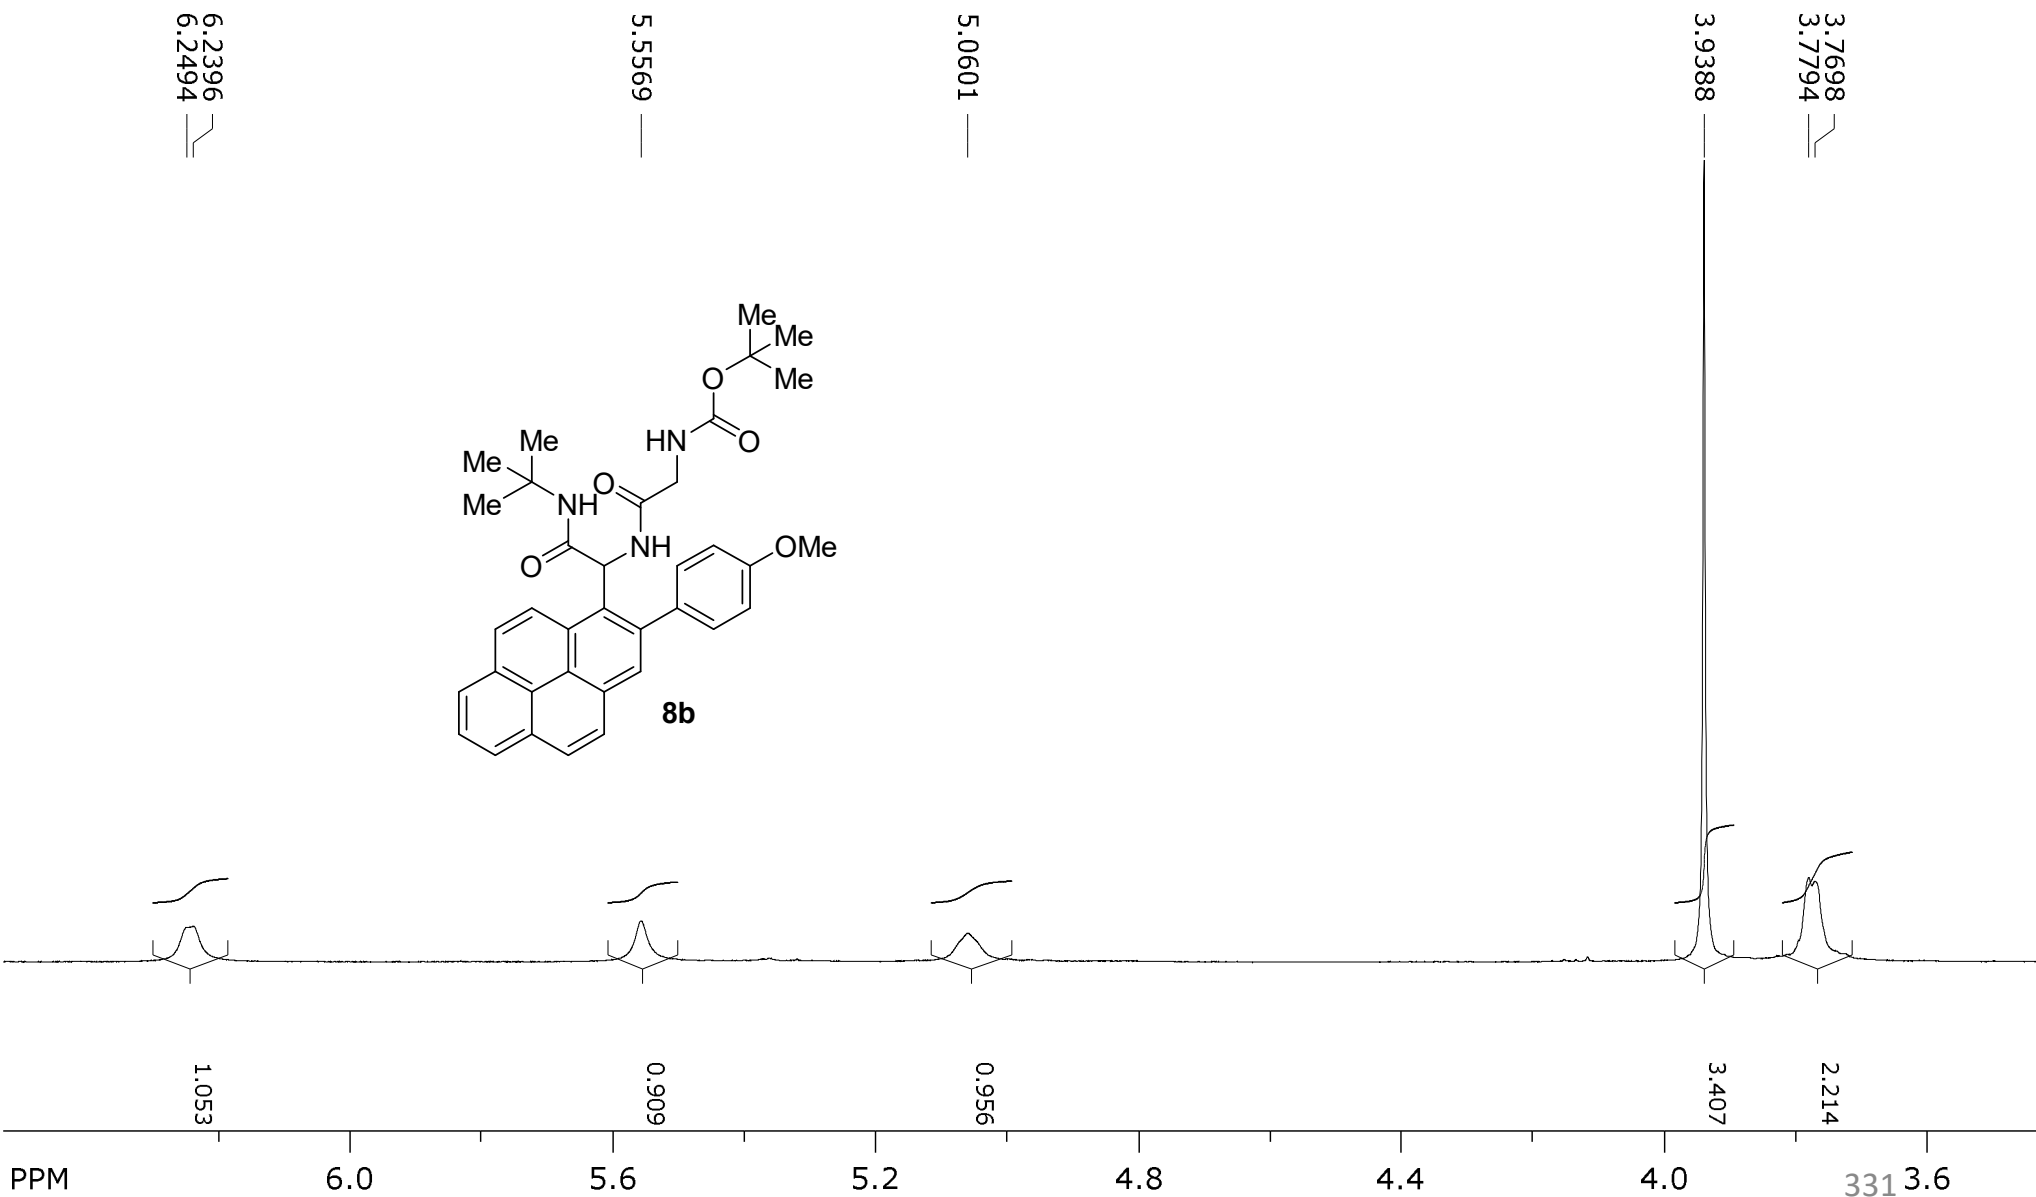

SpinWorks 4: AD-2121  
C13CPD256 CDCl3 /opt/topspin3.5pl2/nmrdata nmrsu 33

168.363  
169.392

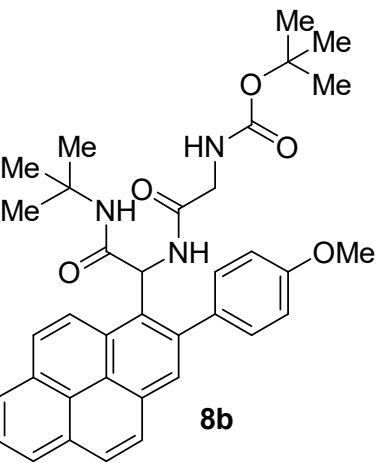

159.276  
141.017  
133.781  
131.114  
131.006  
130.361  
129.159  
128.869  
128.764  
127.929  
127.499  
126.217  
125.773  
125.579  
124.939  
124.697  
123.245  
123.245  
113.954

80.166  
77.364  
77.047  
76.729

55.403  
54.791  
51.848

44.231

29.722  
28.448  
28.243

PPM

160

120

80

40

332

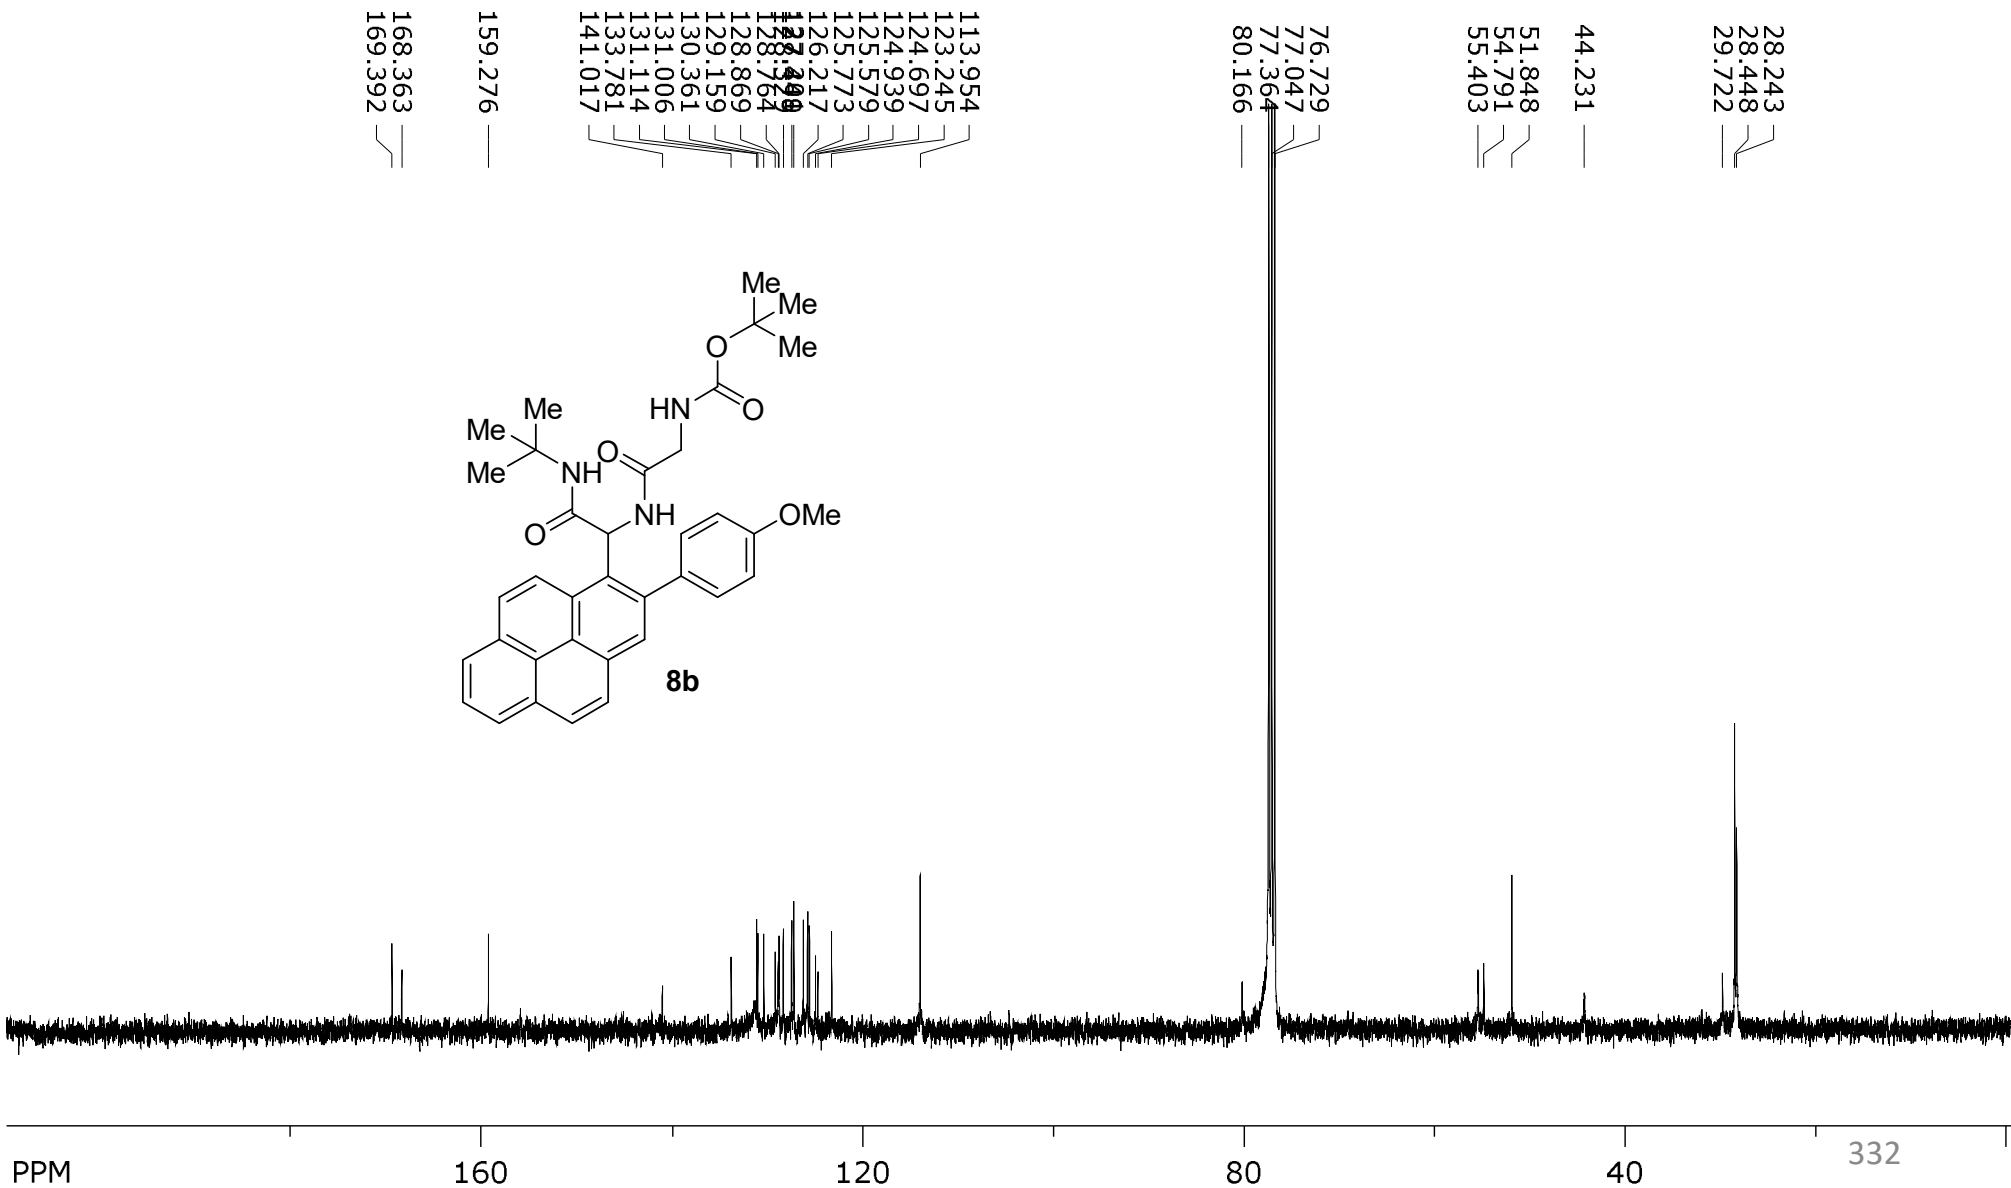

SpinWorks 4: AD-2121  
C13CPD256 CDCl3 /opt/topspin3.5pl2/nmrdata nmrsu 33

141.017

133.781

131.114

131.006

130.361

129.159

128.869

128.764

128.329

127.449

127.201

126.217

125.773

125.579

124.939

123.245

113.954

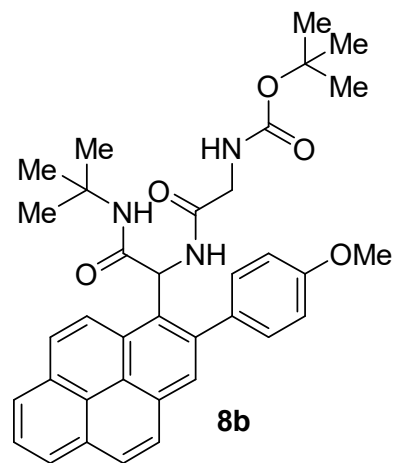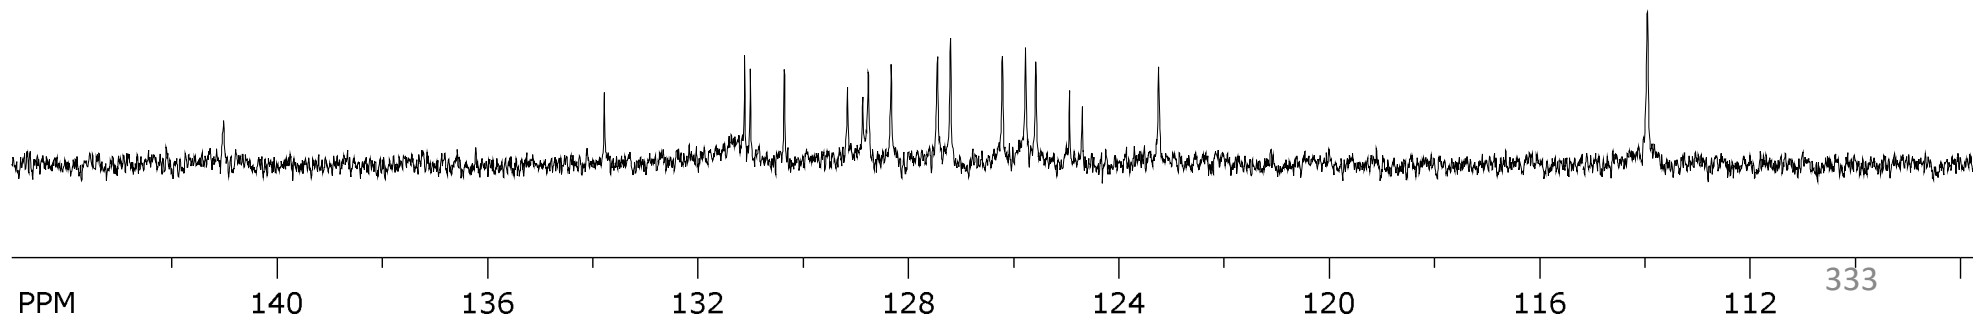

SpinWorks 4: AD-2121  
C13CPD256 CDCl3 /opt/topspin3.5pl2/nmrdata nmrsu 33

54.791  
55.403

51.848

44.231

29.722

28.243  
28.448

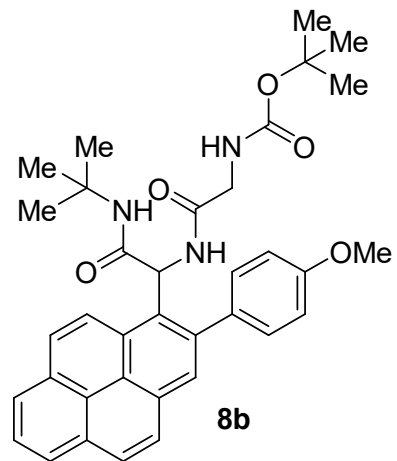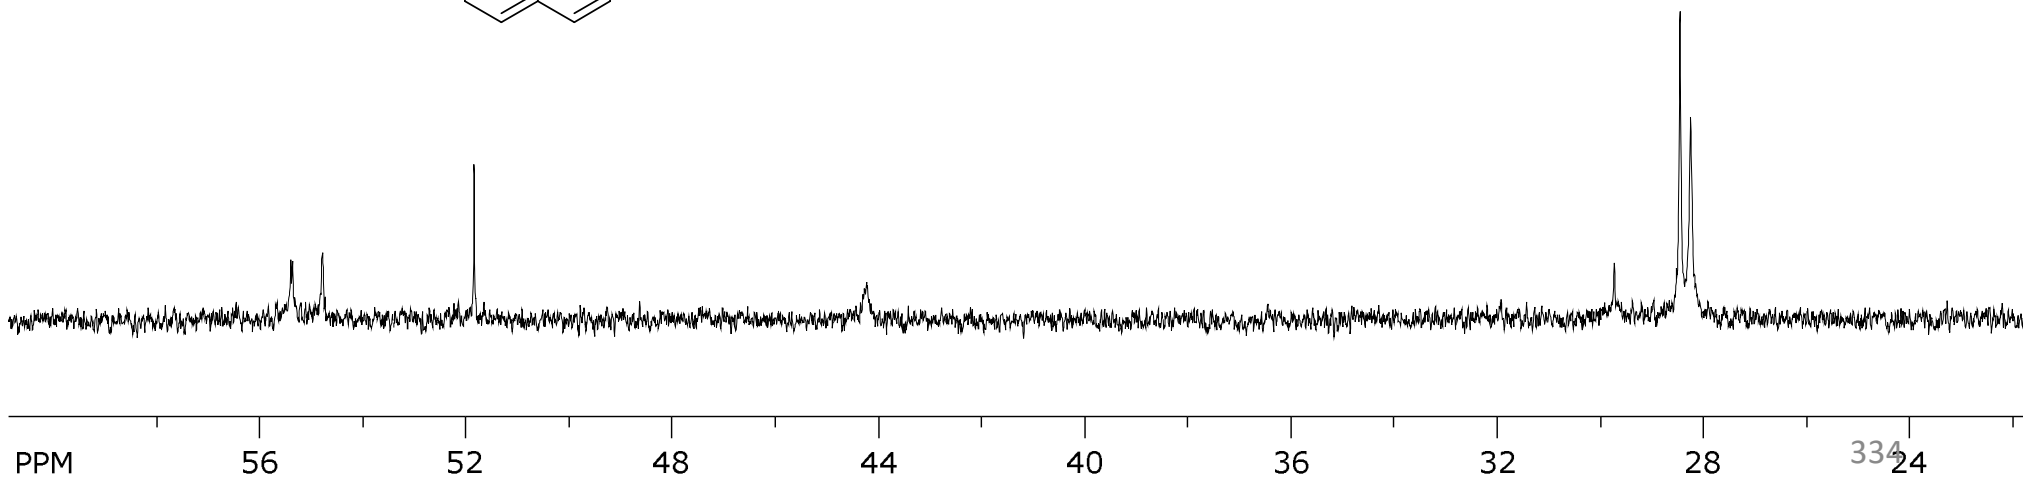

SpinWorks 4: AD 1982  
PROTON CDCl3 /opt/topspin3.5pl2/nmrdata nmrsu 19

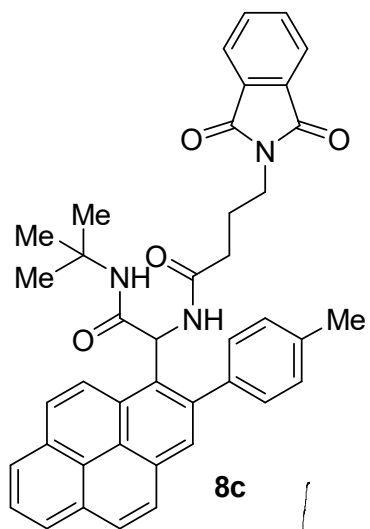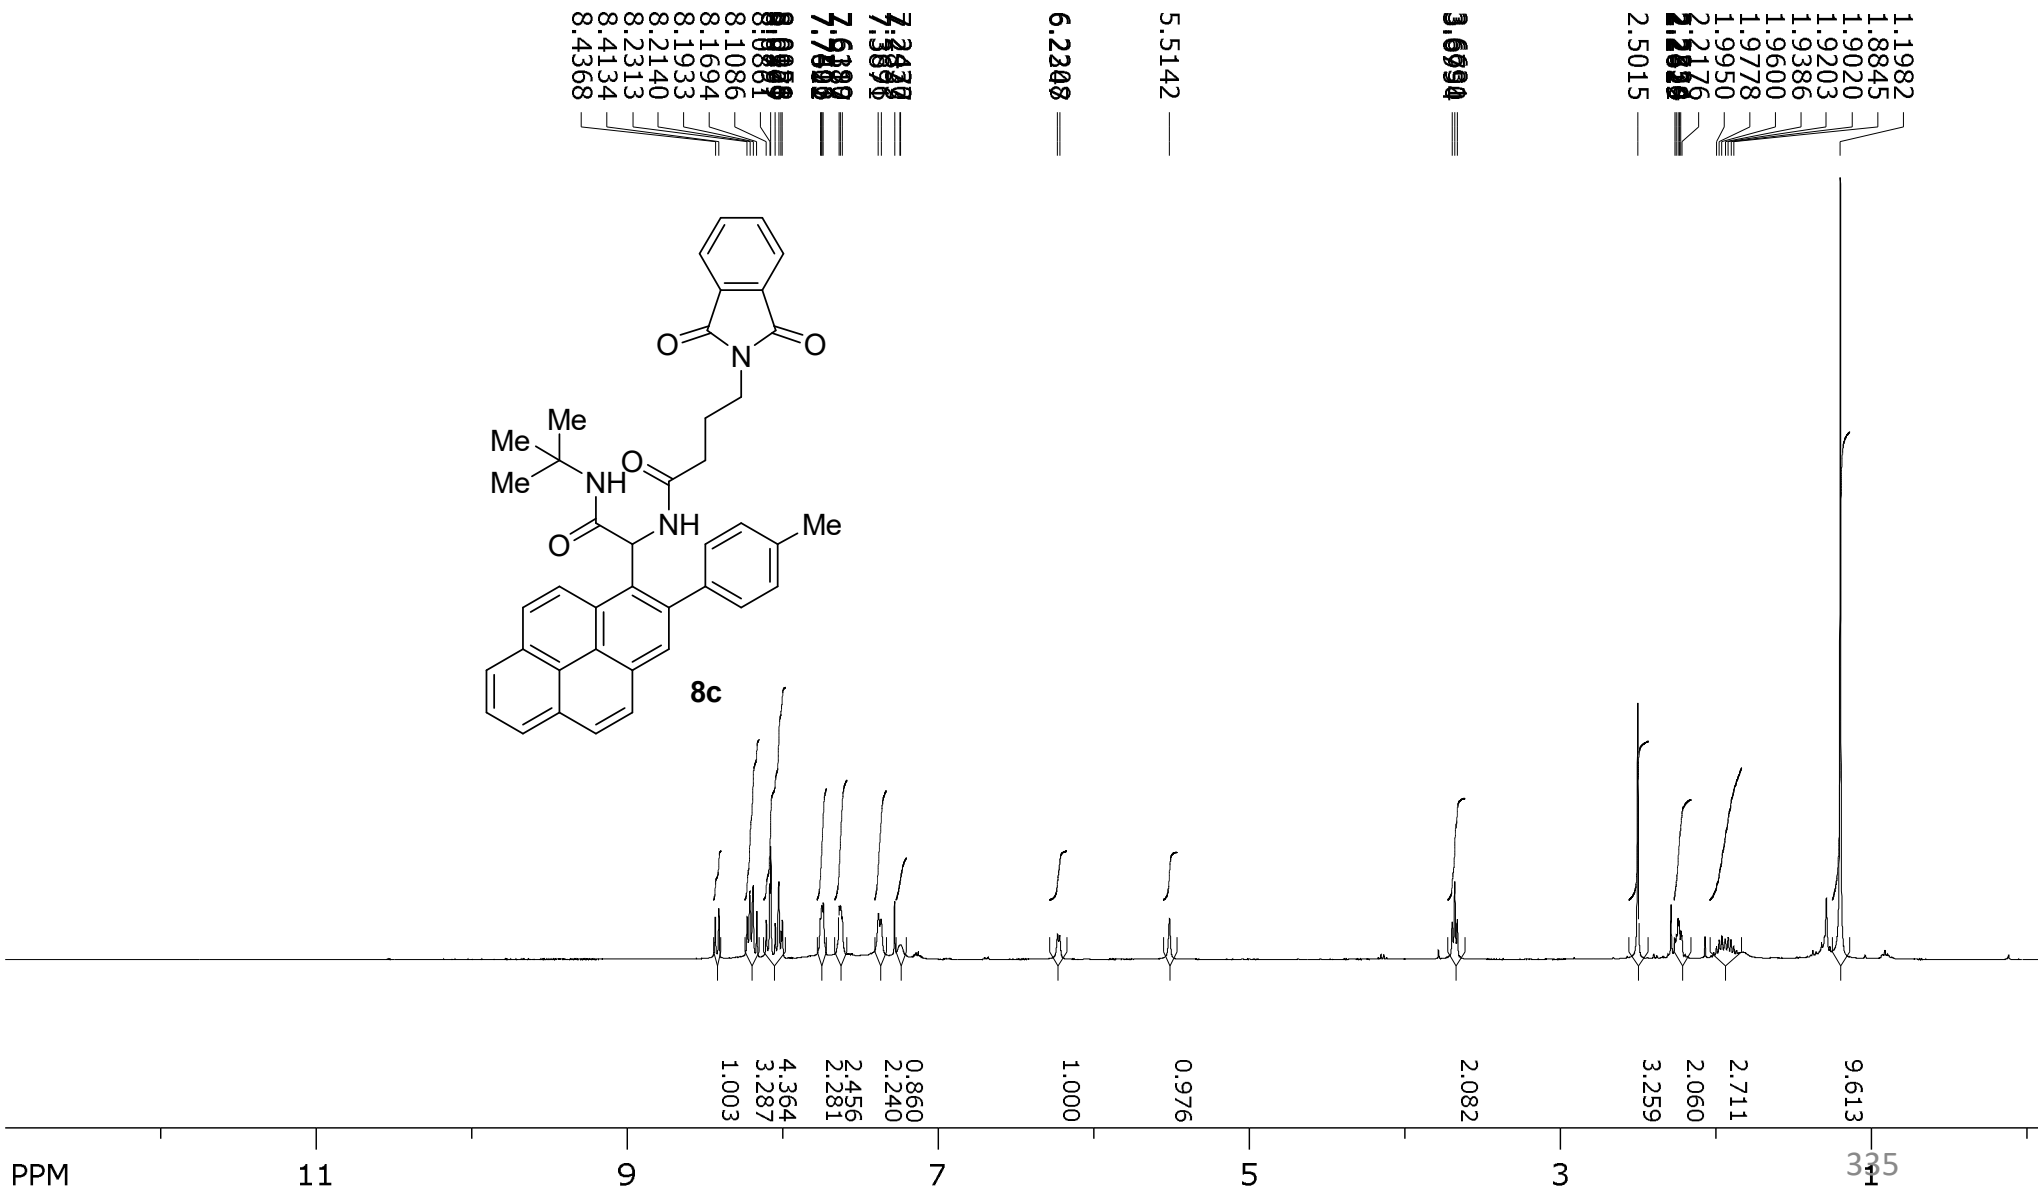

SpinWorks 4: AD 1982  
PROTON CDCl3 /opt/topspin3.5pl2/nmrdata nmrsu 19

8.4134  
8.4368  
—  
—

8.0051  
8.0128  
8.0278  
8.0509  
8.0797  
8.0861  
8.1086  
—  
—  
—  
—  
—  
—  
—  
—

7.7416  
7.7493  
7.7522  
7.7601  
—  
—  
—  
—

7.6199  
7.6310  
7.6387  
—  
—  
—  
—

7.3696  
7.3871  
—  
—

7.2437  
7.2470  
7.2833  
—  
—  
—

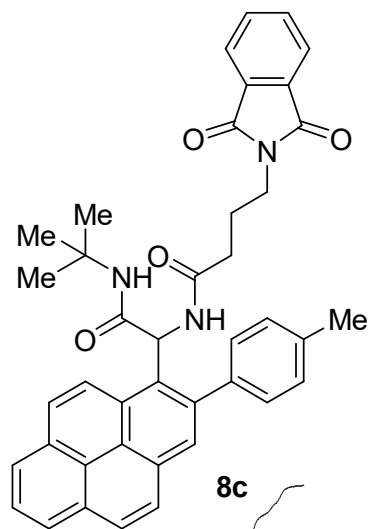

1.003  
8.4

3.287  
8.2

4.364  
8.0

2.281  
7.8

2.456  
7.6

2.240  
7.4

0.850  
7.2

336

PPM



SpinWorks 4: AD 1982  
PROTON CDCl3 /opt/topspin3.5pl2/nmrdata nmrsu 19

6.2208  
6.2347

5.5142

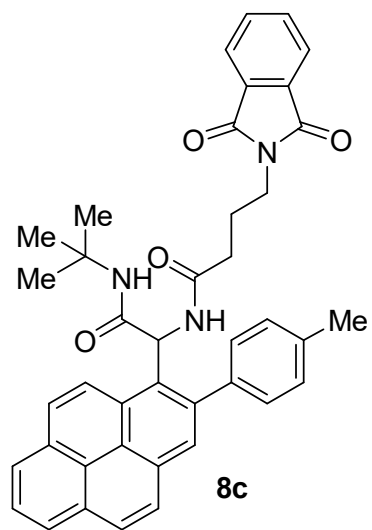

8c

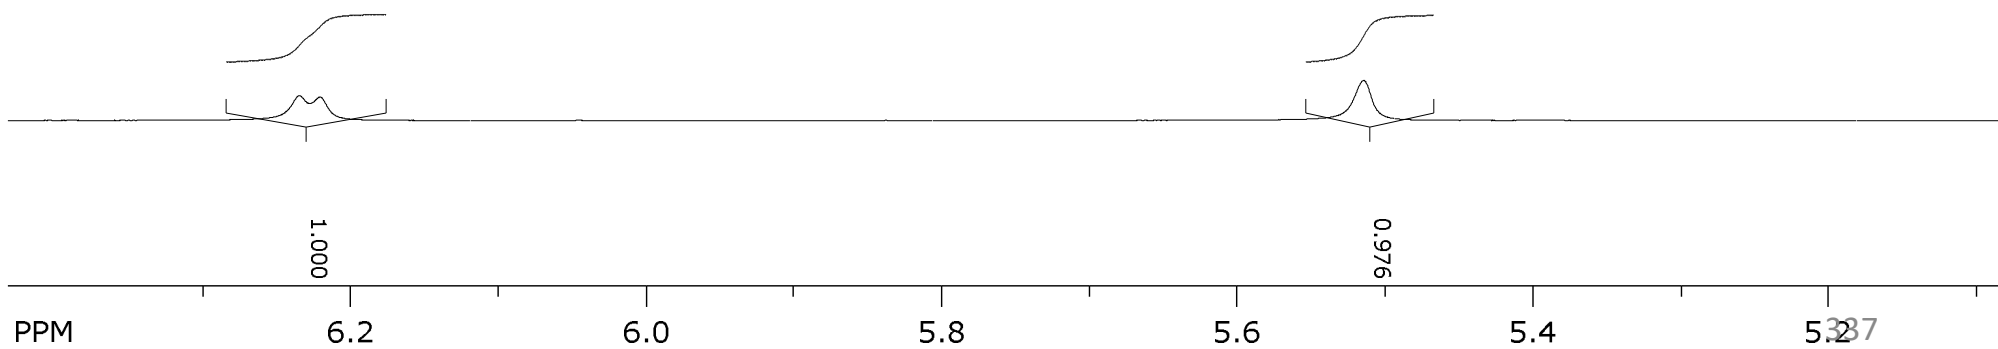

SpinWorks 4: AD 1982  
PROTON CDCl3 /opt/topspin3.5pl2/nmrdata nmrsu 19

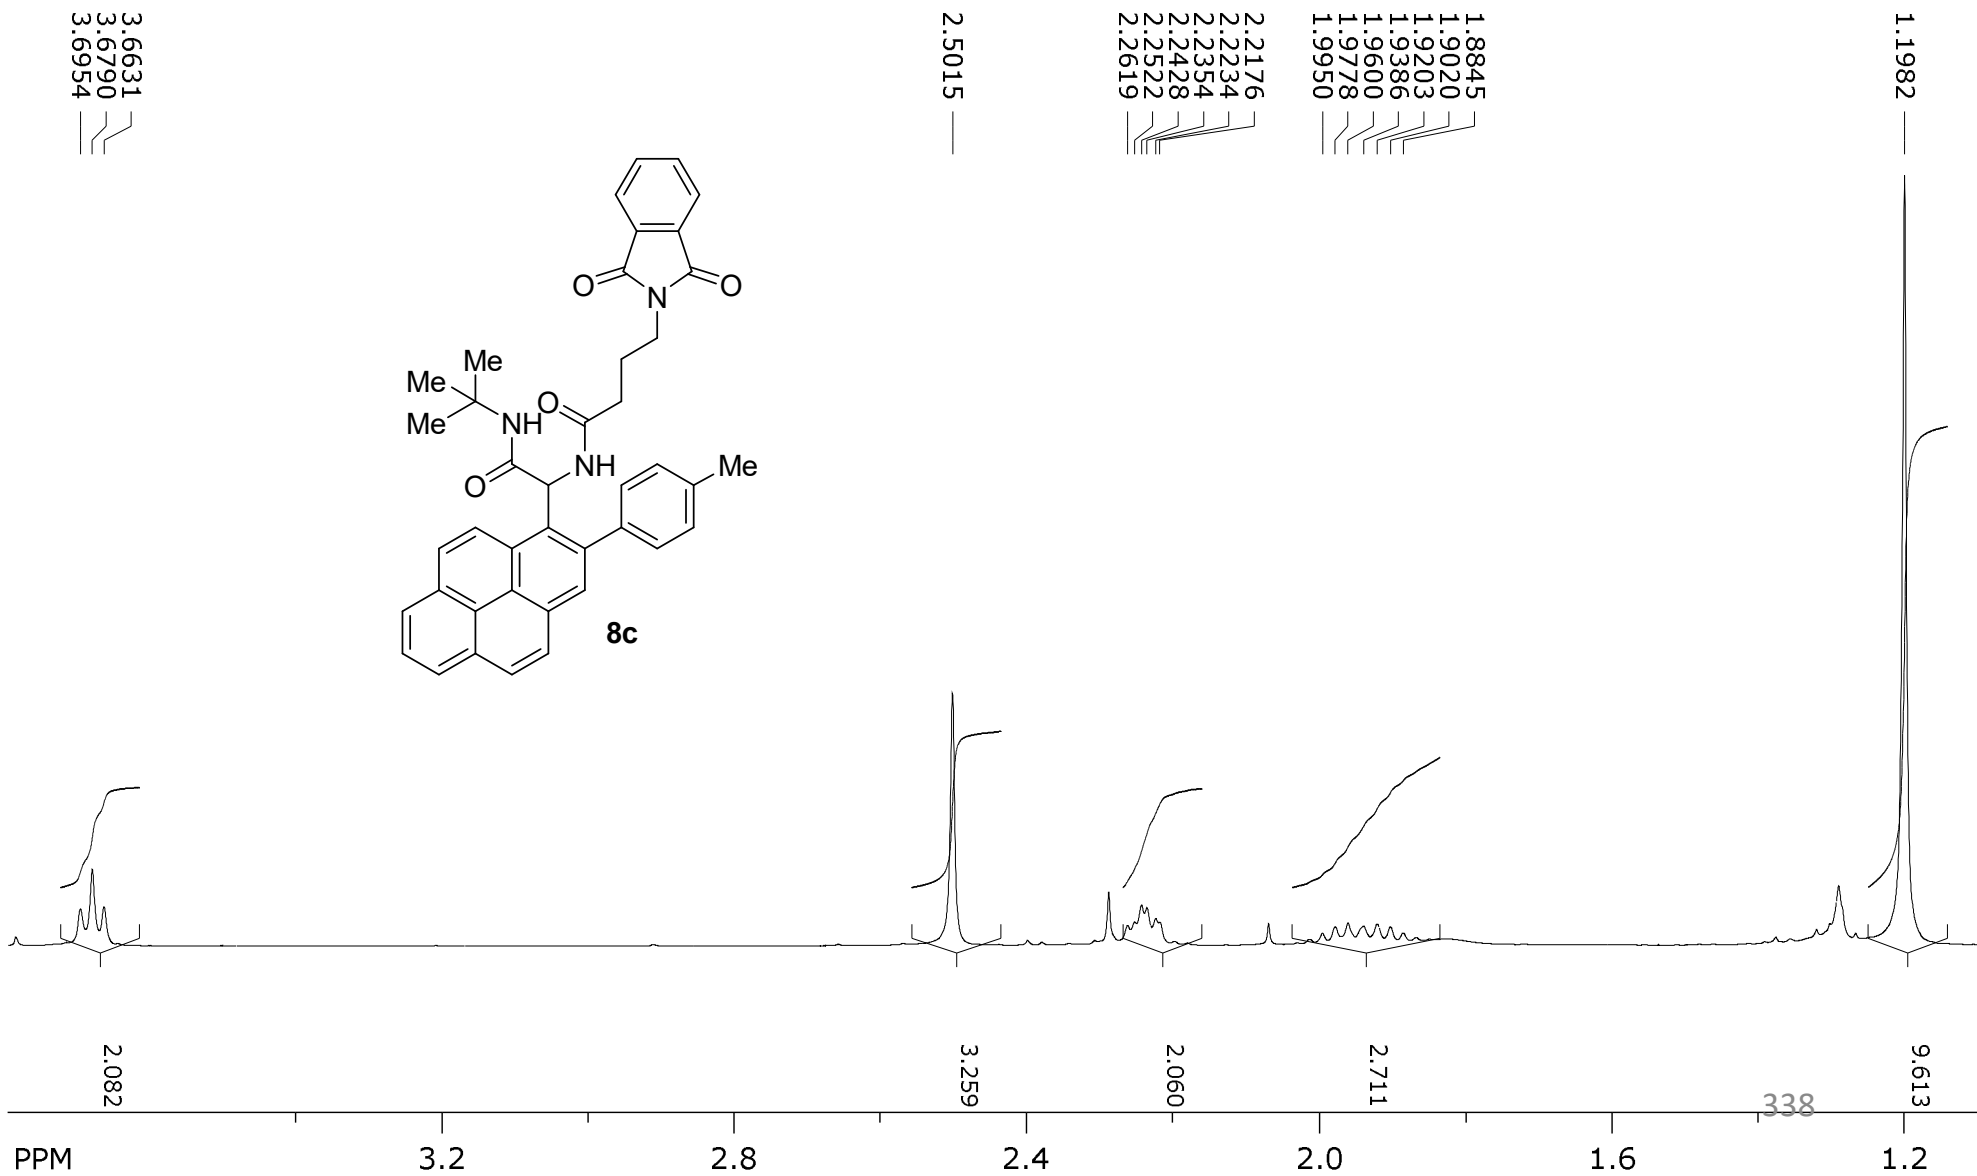

SpinWorks 4: AD 1982  
C13CPD256 CDCl3 /opt/topspin3.5pl2/nmrdata/mrsu 19

168.4369  
169.6728  
171.0838

123.1591  
123.7513  
124.6895  
124.9537  
125.5076  
125.6451  
126.1555  
130.4309  
130.8793  
131.1325  
131.9237  
133.8414  
137.5458  
138.7485  
141.2654

76.7656  
77.0836  
77.4012

51.7571  
55.0523

21.3736  
24.8166  
28.4748  
33.6092  
37.2016

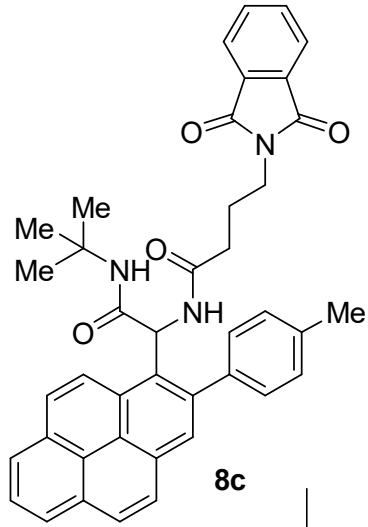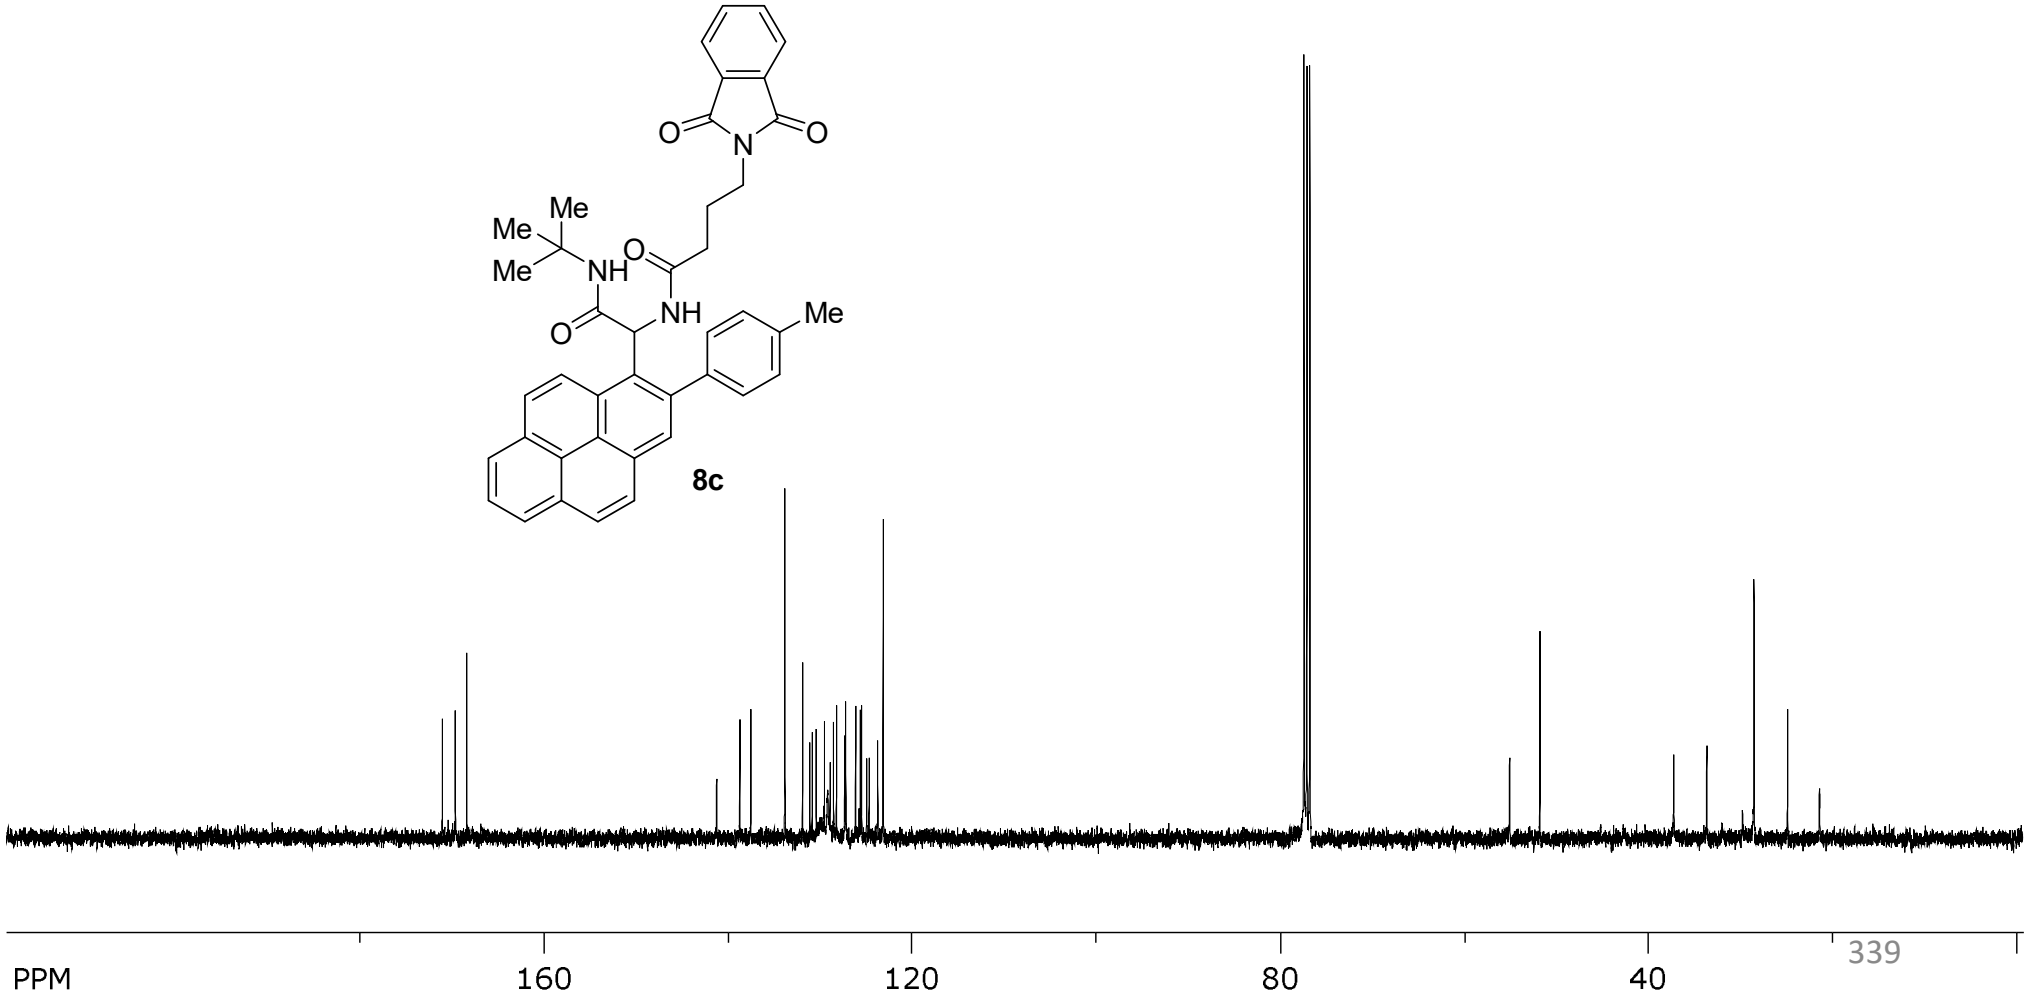

SpinWorks 4: AD 1982

C13CPD256 CDCl3 /opt/topspin3.5pl2/nmrdata nmrsu

141.2654 —  
138.7485 —  
137.5458 —  
133.8414 —  
131.9237 —  
130.4309 —  
130.8793 —  
131.1325 —  
129.5517 —  
129.2244 —  
129.1688 —  
128.9269 —  
128.5635 —  
128.2279 —  
127.3294 —  
126.1555 —  
125.6451 —  
125.5076 —  
124.9537 —  
124.6895 —  
123.7513 —  
123.1591 —

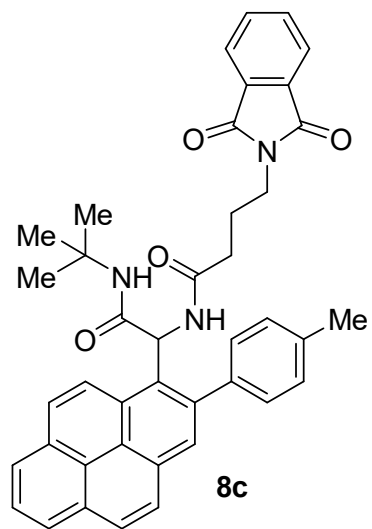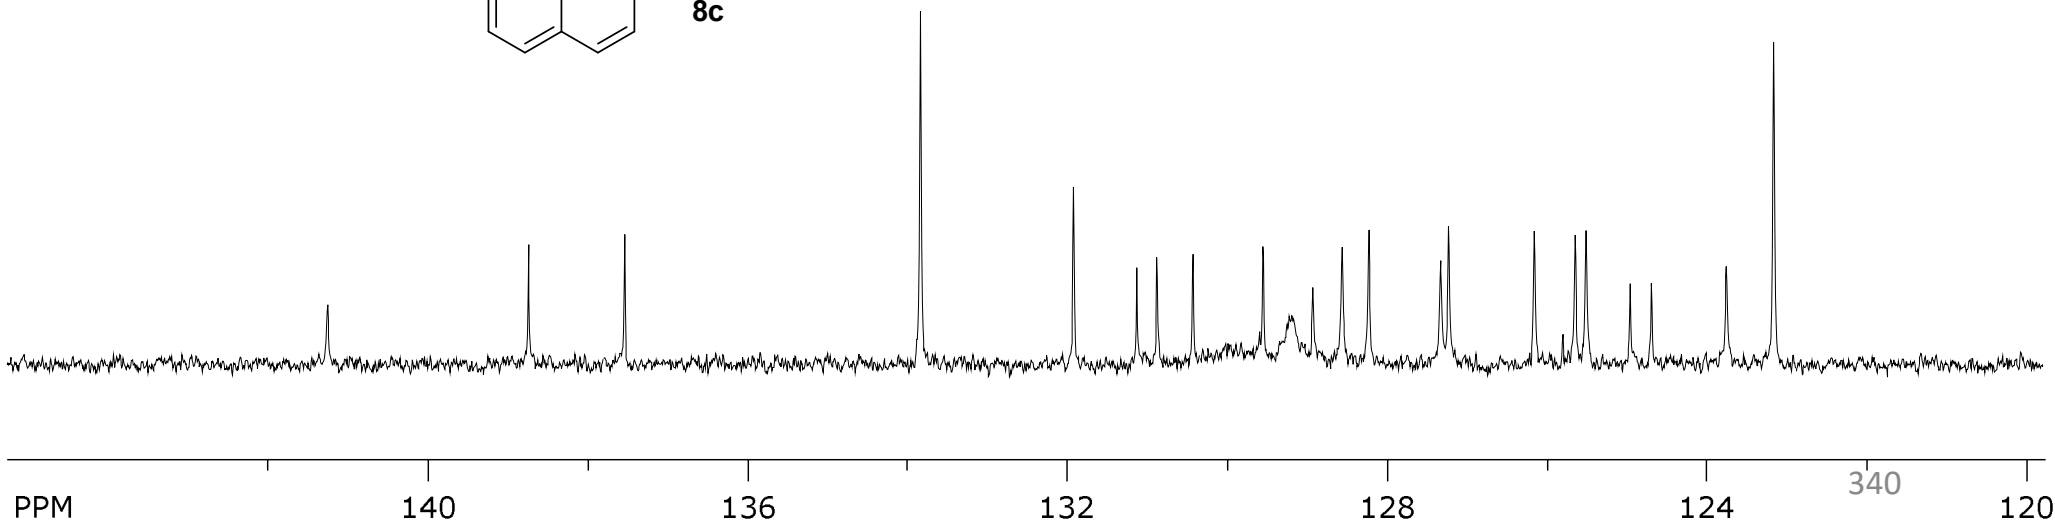

SpinWorks 4: AD 2195 B  
PROTON CDCl3 /opt/topspin3.5pl2/nmrdata nmrsu 58

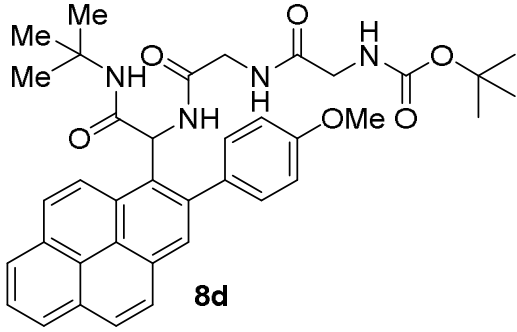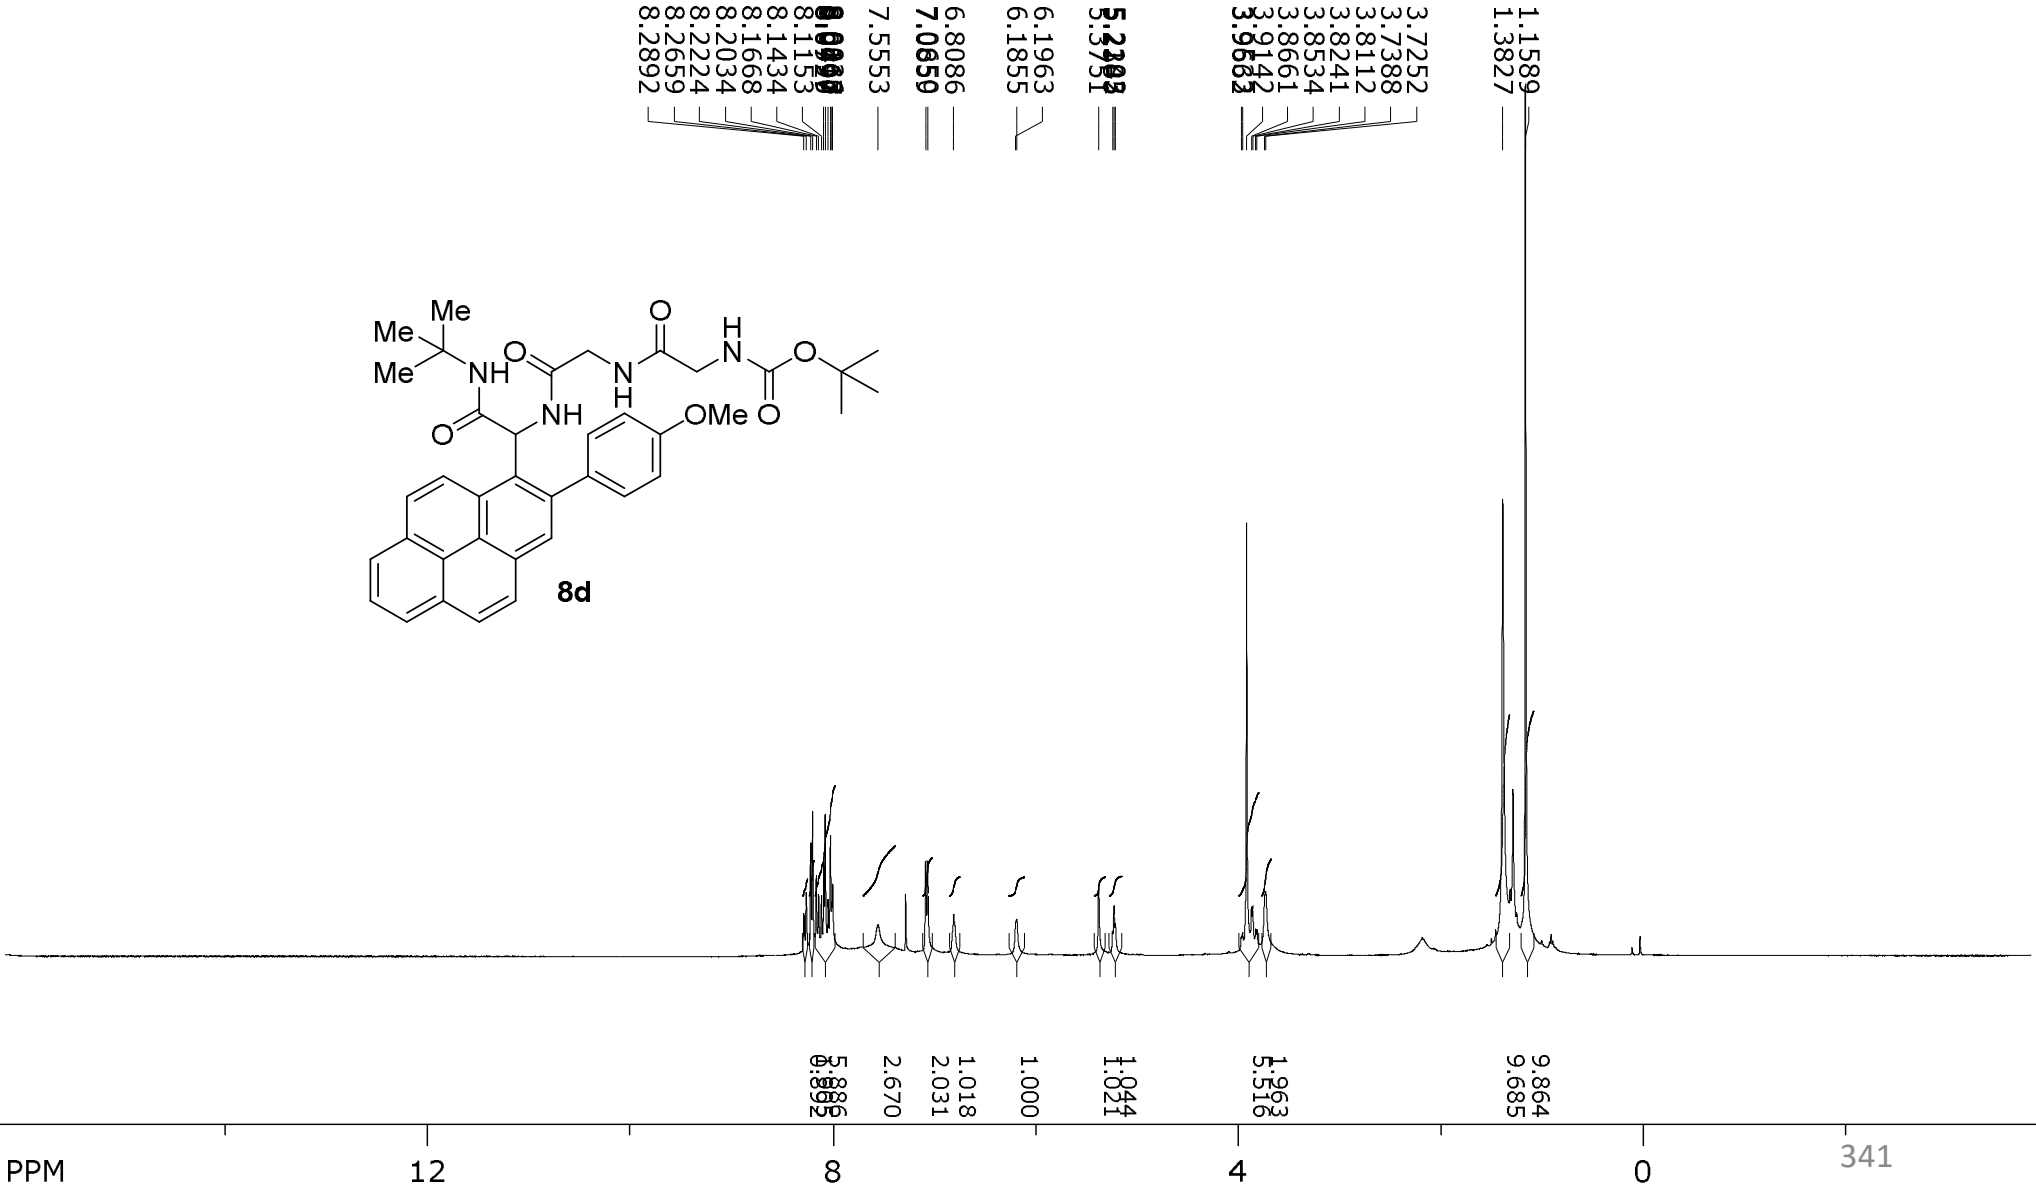

SpinWorks 4: AD 2195 B  
PROTON CDCl3 /opt/topspin3.5pl2/nmrdata nmrsu 58

8.0036  
8.0117  
8.0263  
8.0497  
8.0790  
8.0929  
8.1153  
8.1434  
8.1668  
8.2034  
8.2224  
8.2659  
8.2892

7.5553

7.0650  
7.0859

6.8086

6.1963  
6.1855

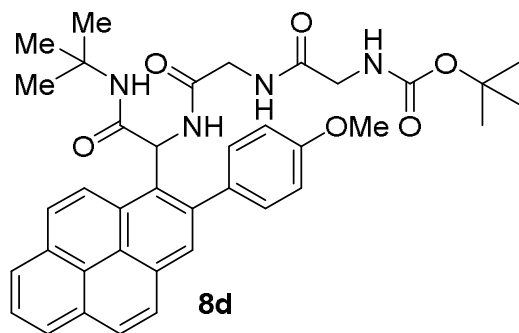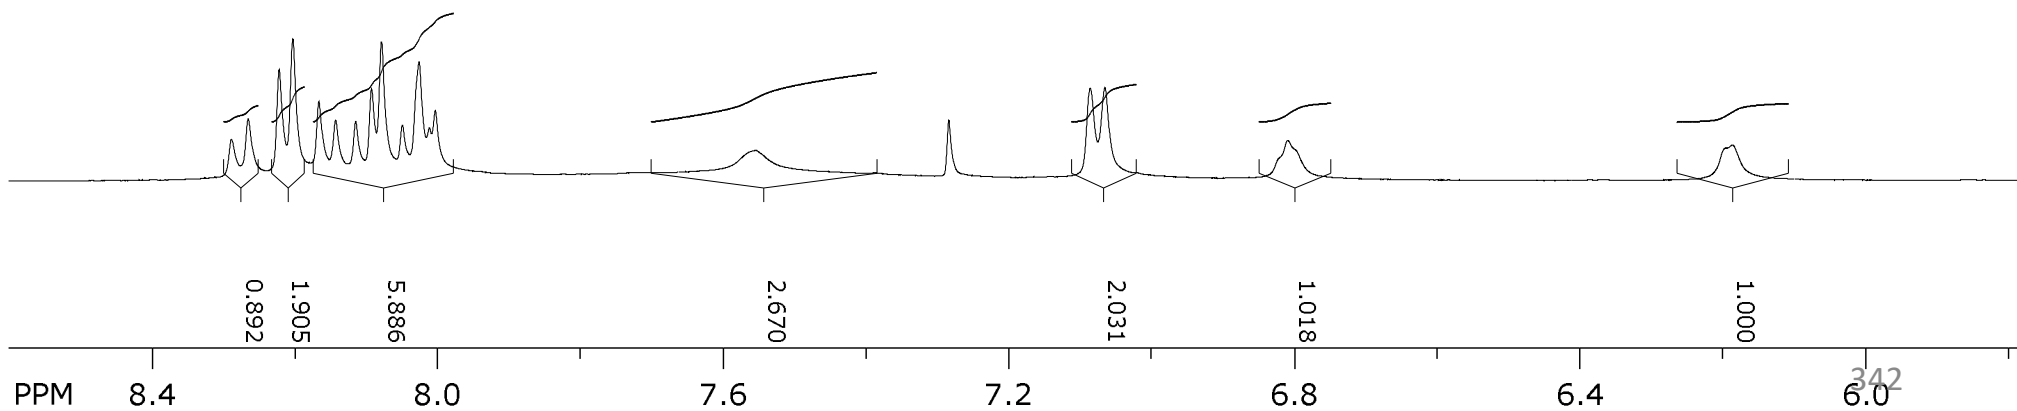

SpinWorks 4: AD 2195 B  
PROTON CDCl3 /opt/topspin3.5pl2/nmrdata nmrsu 58

5.3751  
5.2103  
5.2242  
5.2385

3.7252  
3.7388  
3.8112  
3.8241  
3.8534  
3.8661  
3.9142  
3.9533  
3.9662



8d

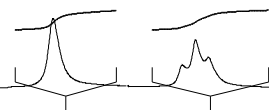

1.021

1.044

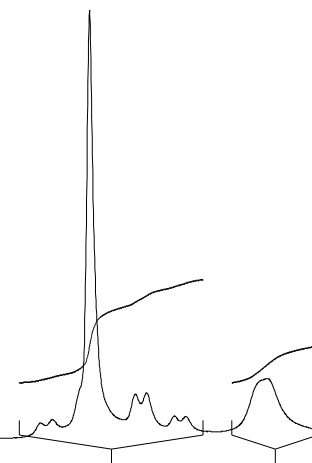

5.516

1.963

343  
3.6

PPM

5.2

4.8

4.4

4.0

SpinWorks 4: AD 2195 B  
PROTON CDCl3 /opt/topspin3.5pl2/nmrdata nmrsu 58

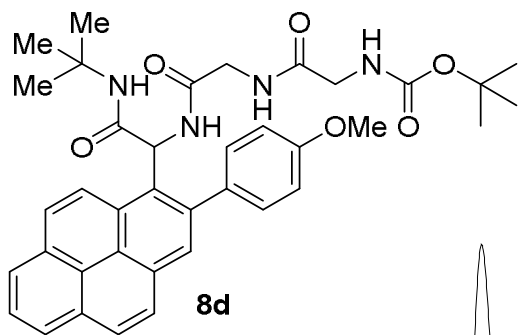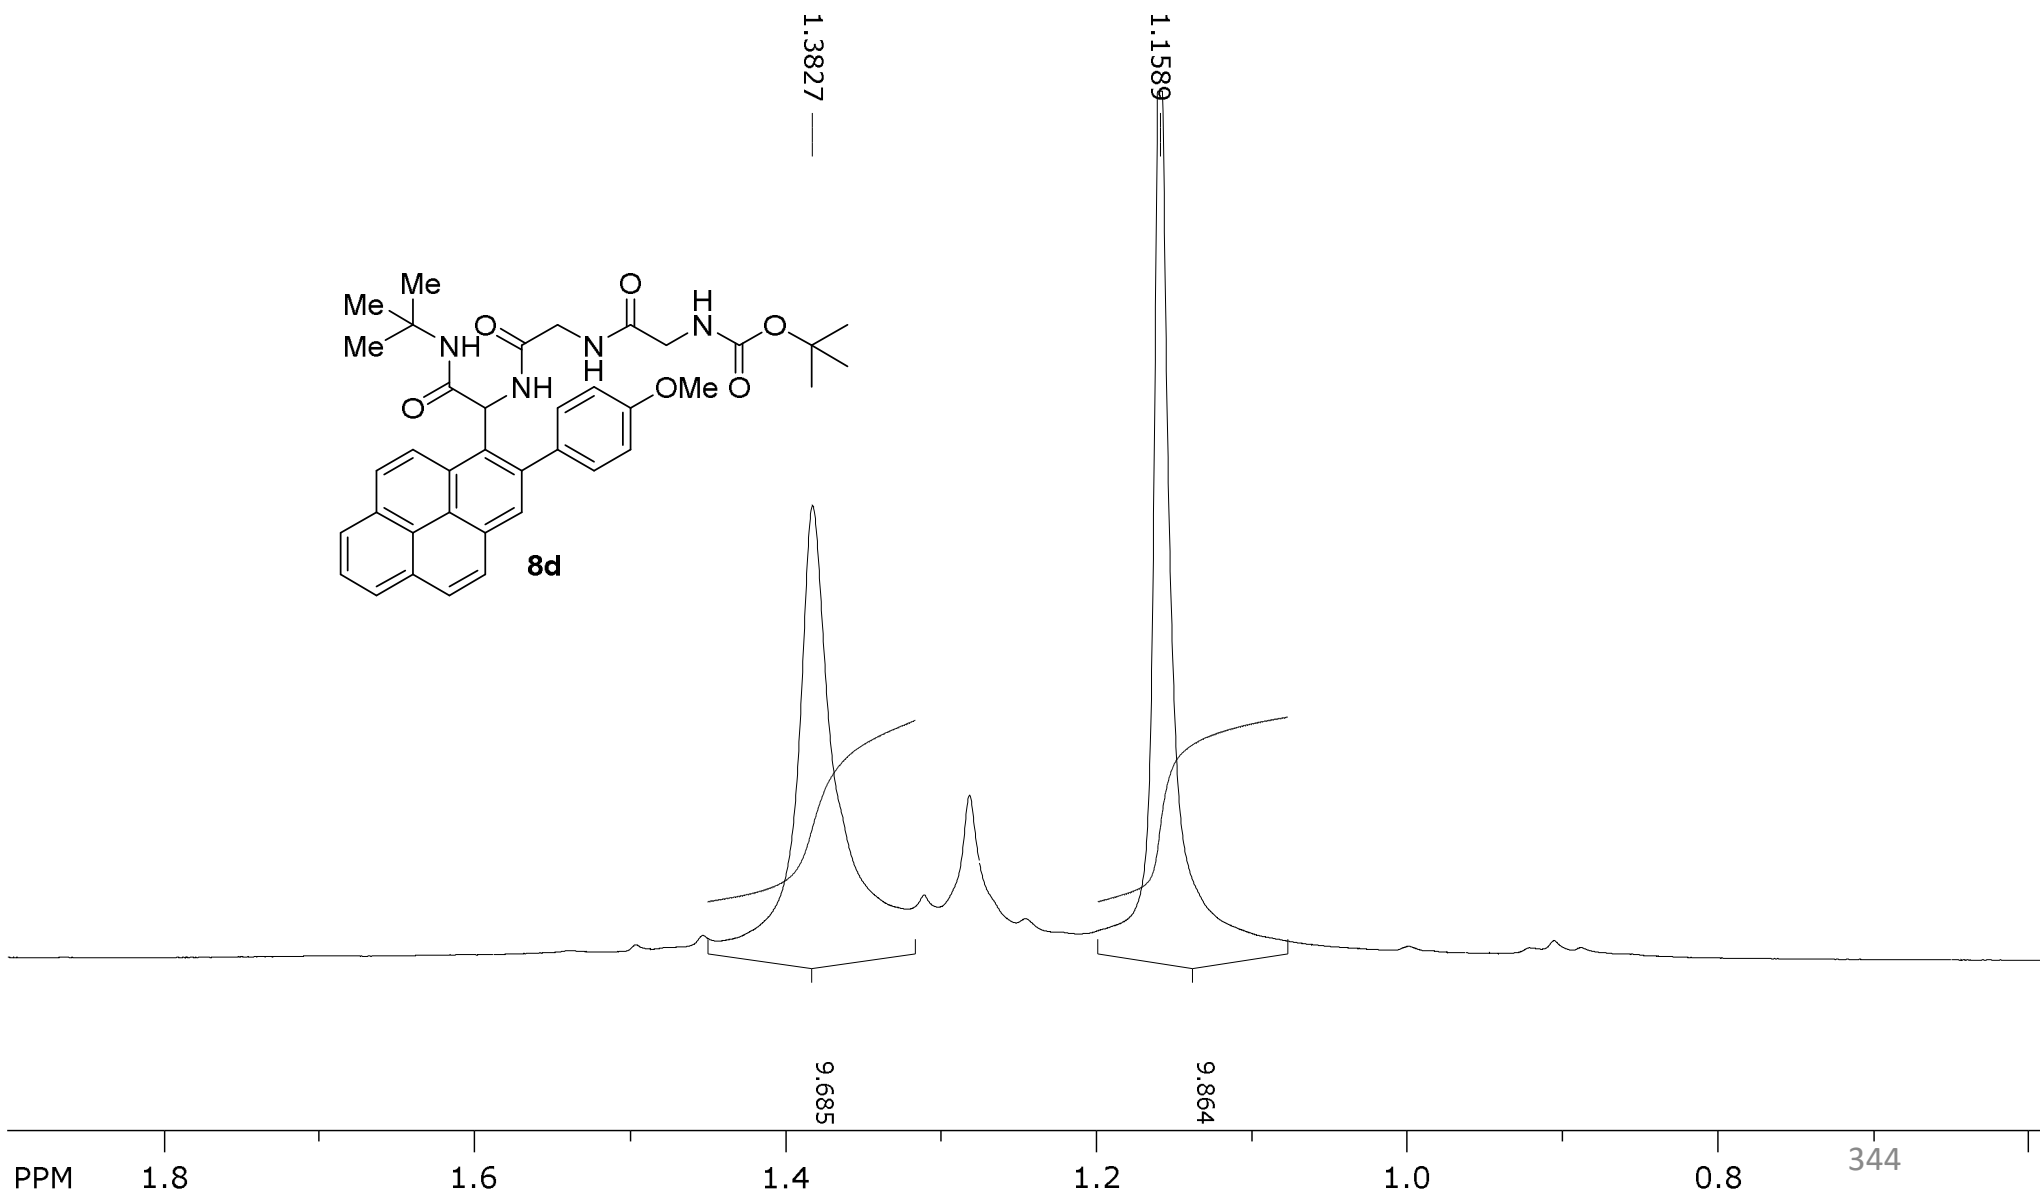



SpinWorks 4: AD 2195 B

C13CPD256 CDCl3 /opt/topspin3.5pl2/nmrdata nmrsu 58

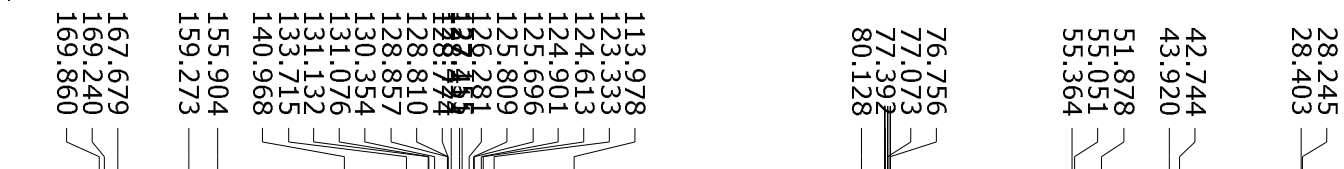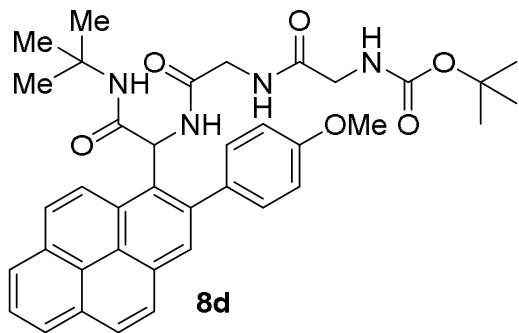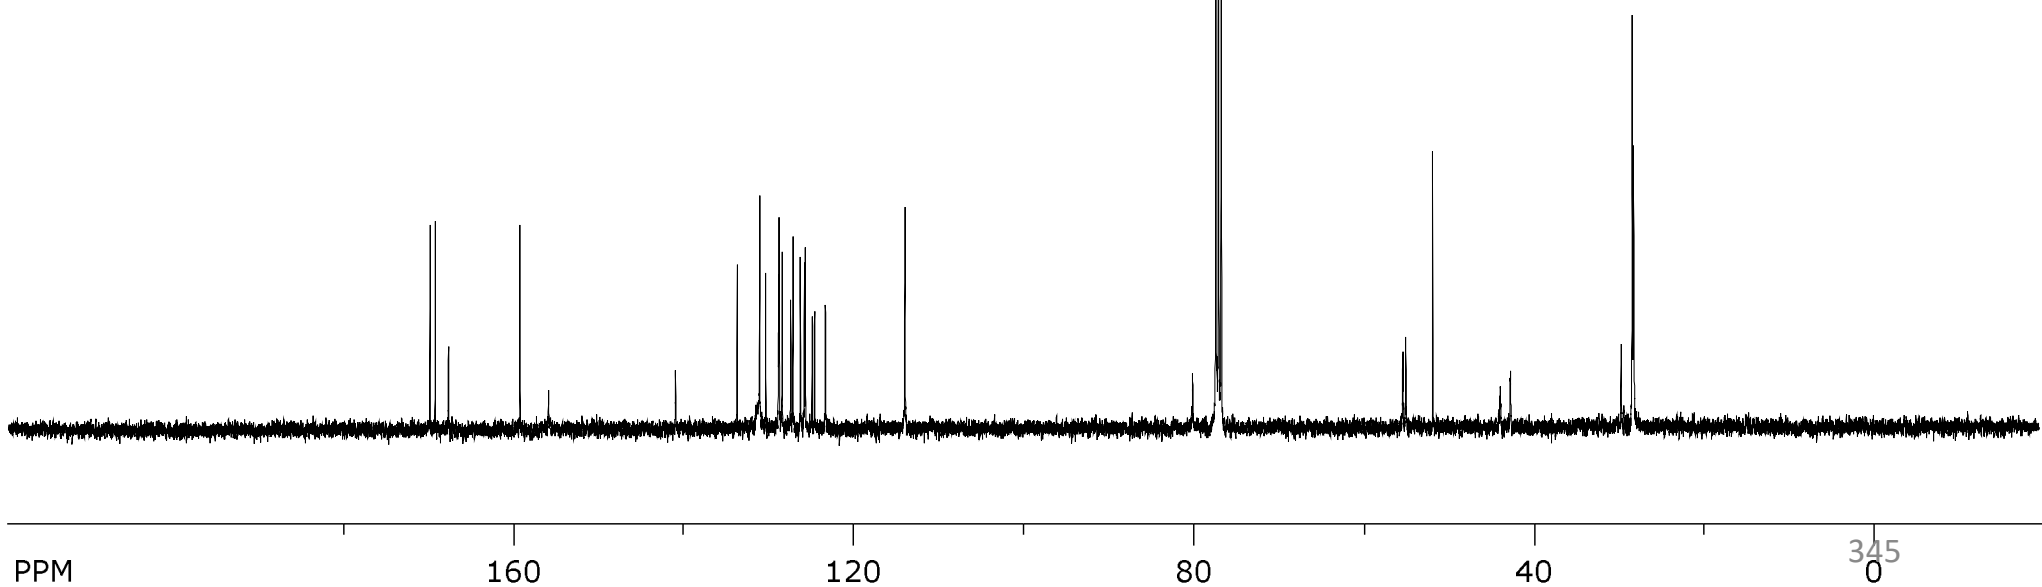

SpinWorks 4: AD 2195 B  
C13CPD256 CDCl3 /opt/topspin3.5pl2/nmrdata nmrsu 58

167.679 —  
169.240 —  
169.860 —

159.273 —

155.904 —

140.968 —

123.333 —  
124.613 —  
124.901 —  
125.696 —  
125.809 —  
126.281 —  
127.155 —  
127.411 —  
128.424 —  
128.774 —  
128.810 —  
128.857 —  
130.354 —  
131.076 —  
131.132 —  
133.715 —

113.978 —

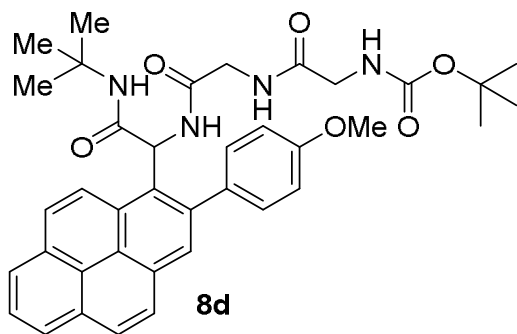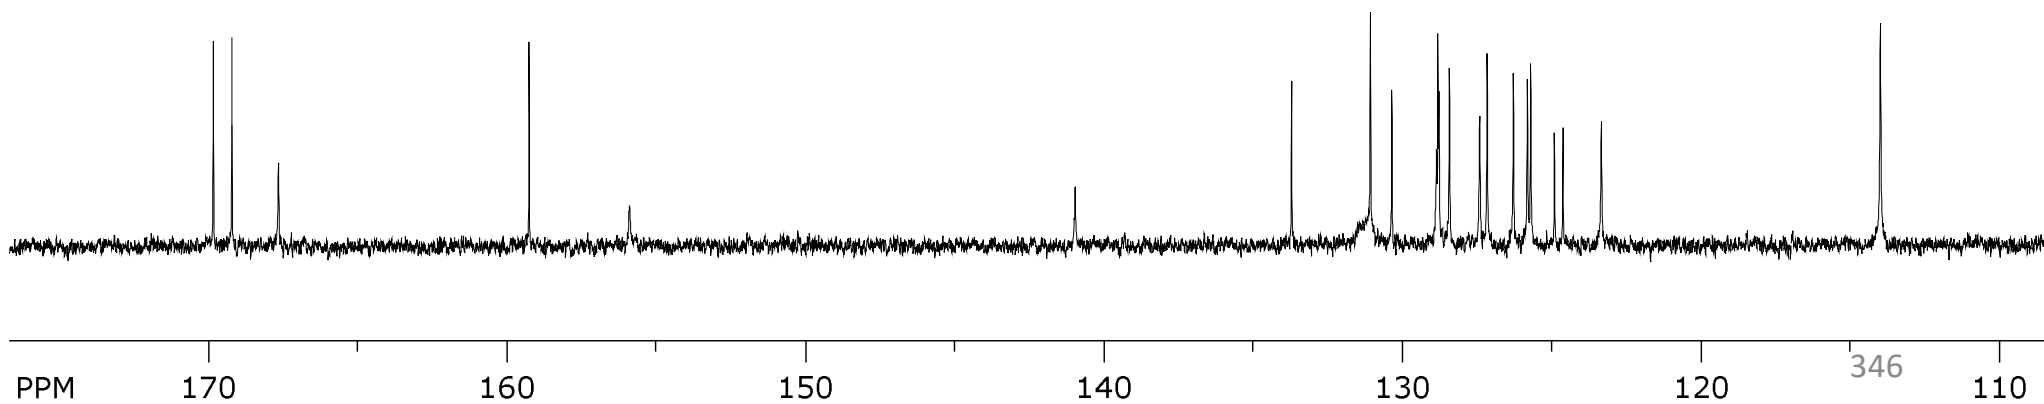

SpinWorks 4: AD 2195 B  
C13CPD256 CDCl3 /opt/topspin3.5pl2/nmrdata nmrsu 58

80.128 —  
77.392 —  
77.073 —  
76.756 —  
55.051 —  
55.364 —  
51.878 —  
43.920 —  
42.744 —  
28.245 —  
28.403 —

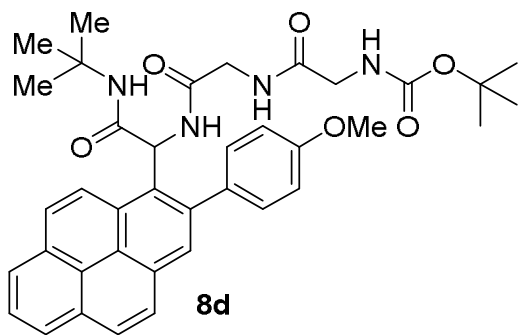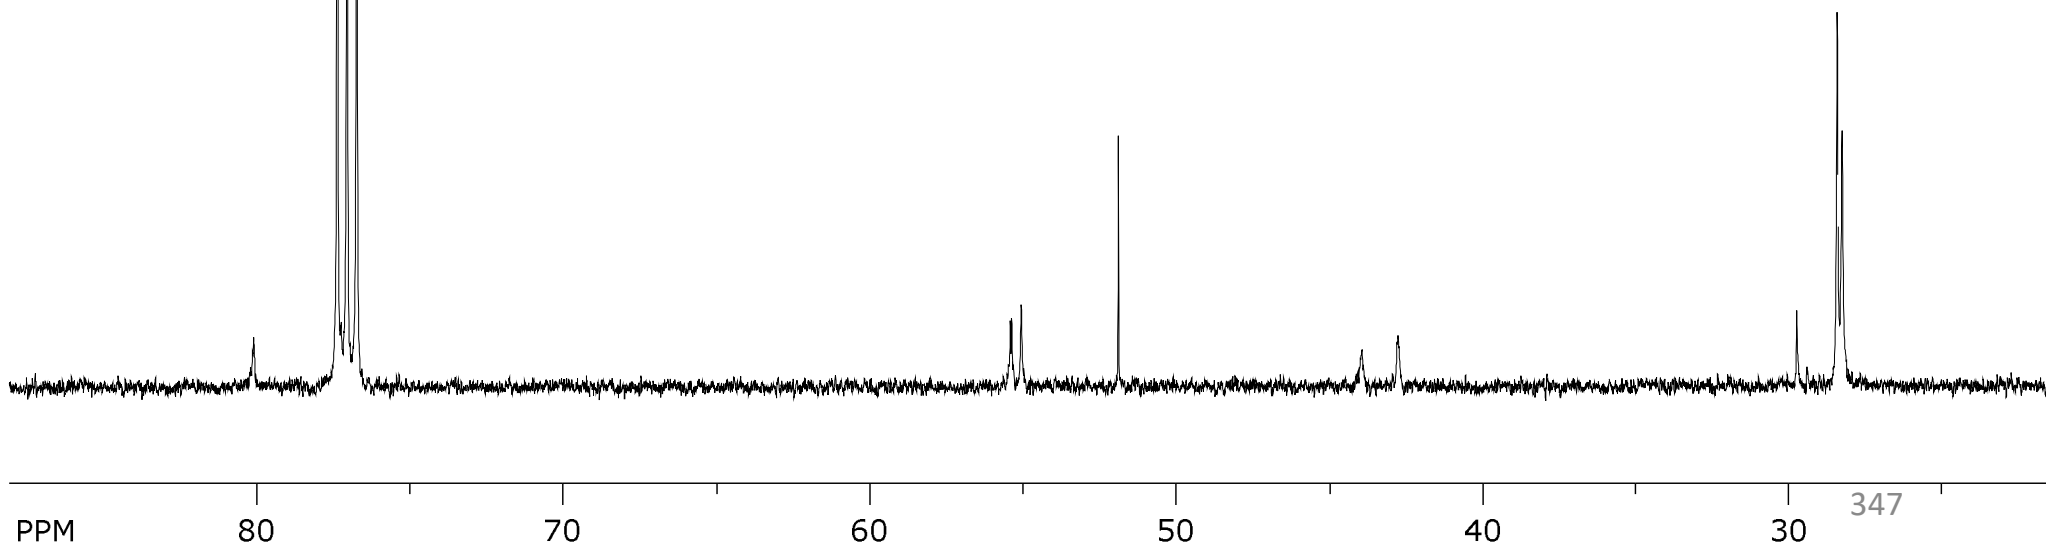

SpinWorks 4: SUB 216 RE  
PROTON CDCl3 /opt/topspin3.5pl2/nmrdata nmrsu 52

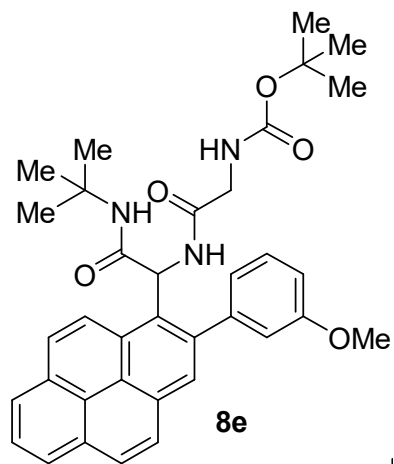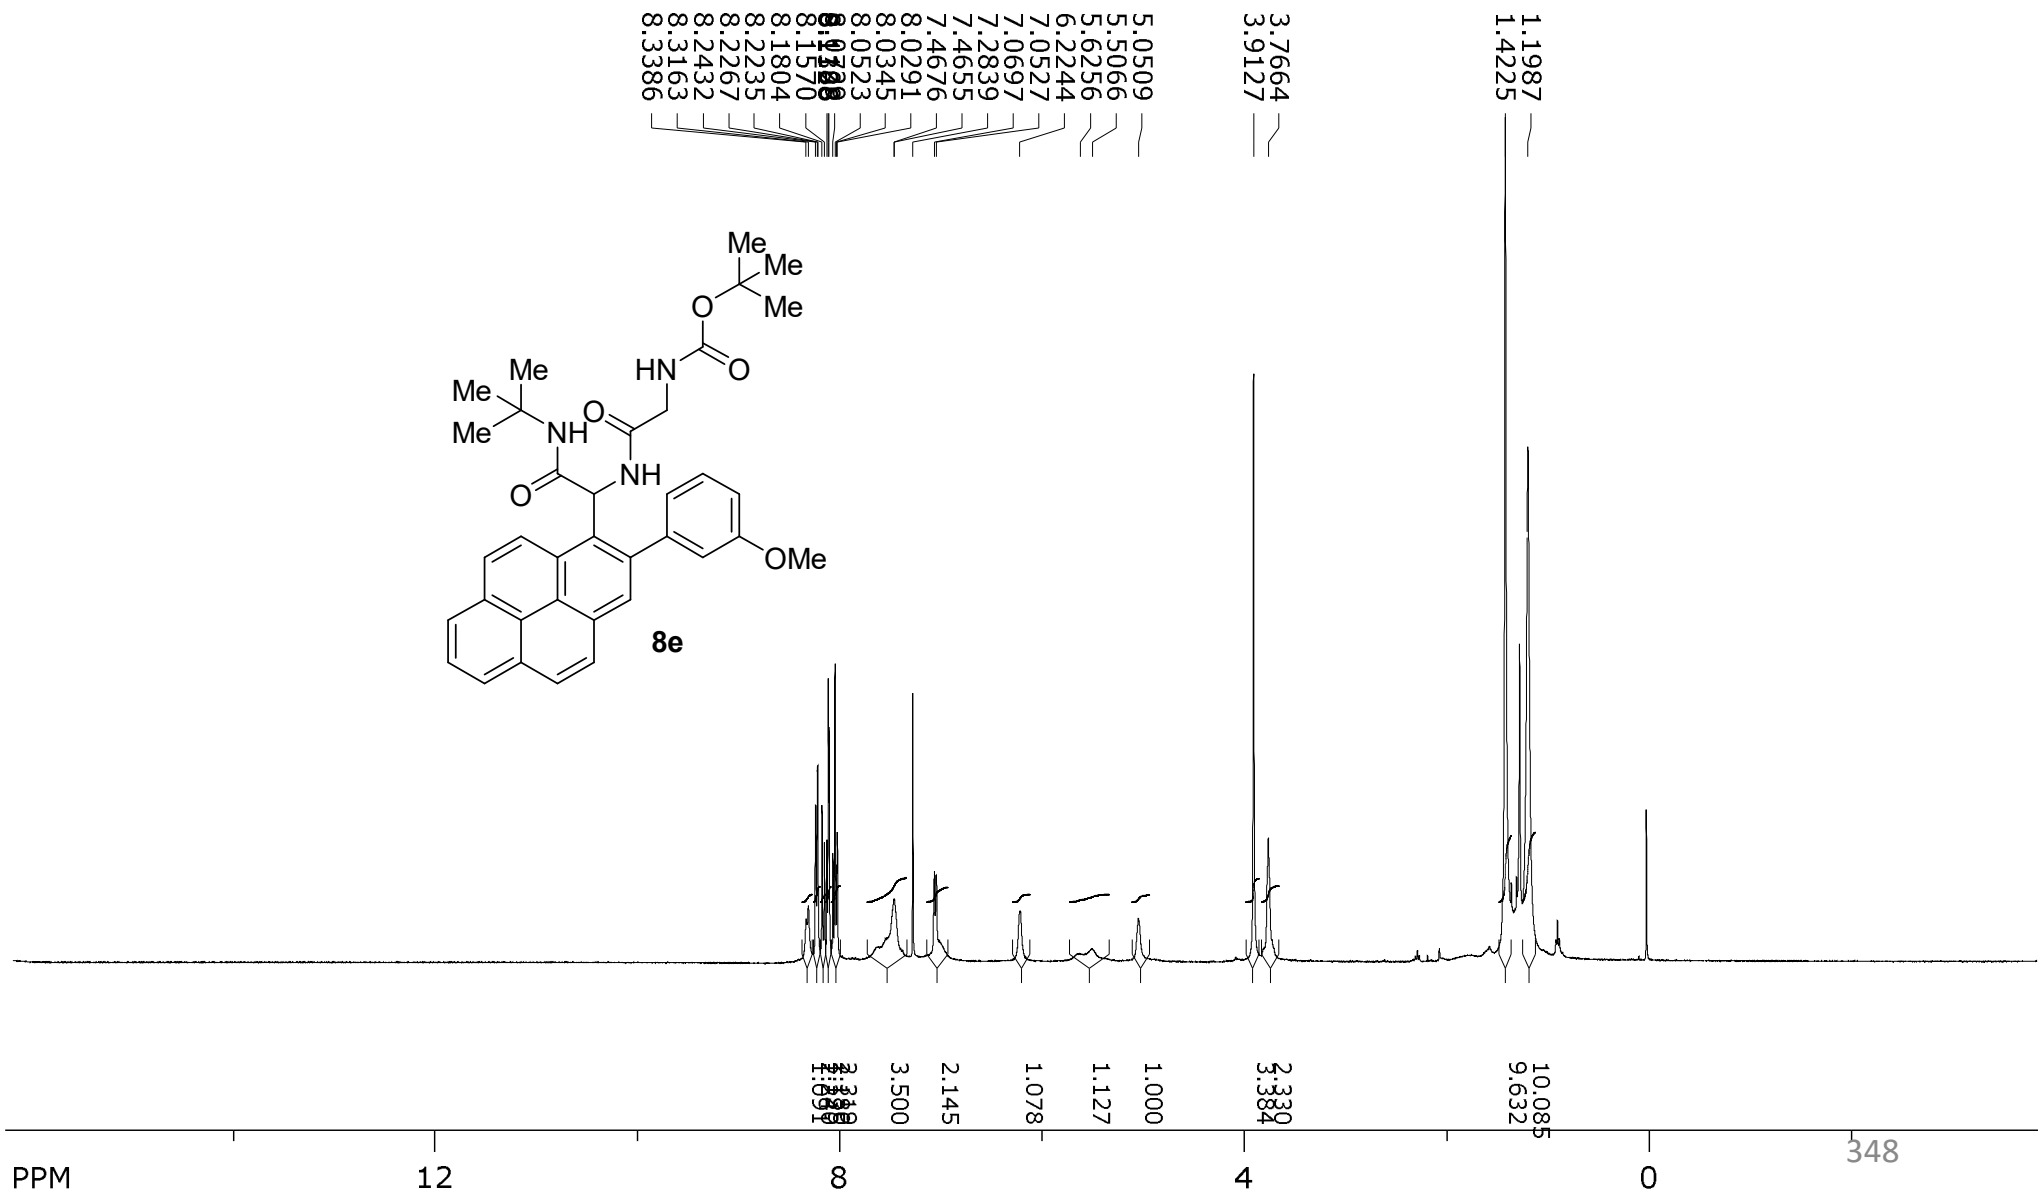

SpinWorks 4: SUB 216 RE  
PROTON CDCl3 /opt/topspin3.5pl2/nmrdata nmrsu 52

8.0291  
8.0345  
8.0523  
8.0729  
8.1108  
8.1186  
8.1328  
8.1570  
8.1804  
8.2235  
8.2267  
8.2432  
8.3163  
8.3386

7.4655  
7.4676

7.2839

7.0527  
7.0697

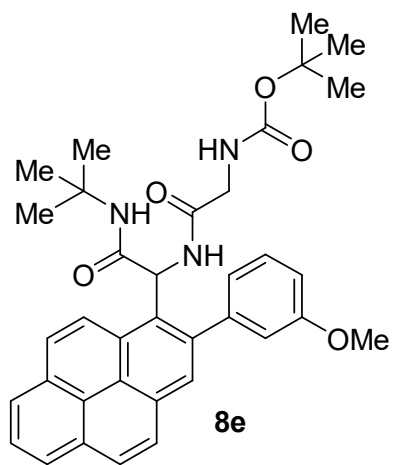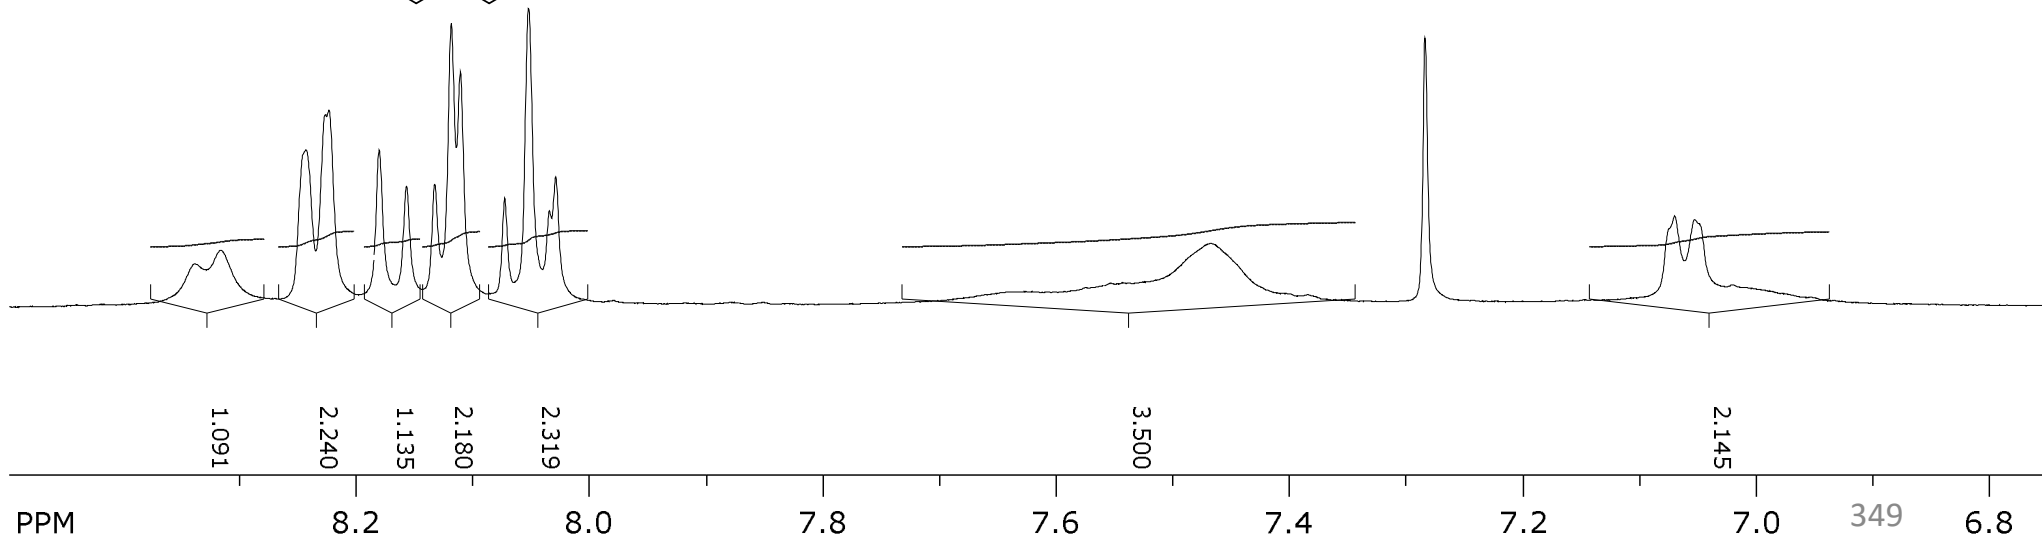

SpinWorks 4: SUB 216 RE  
PROTON CDCl3 /opt/topspin3.5pl2/nmrdata nmrsu 52

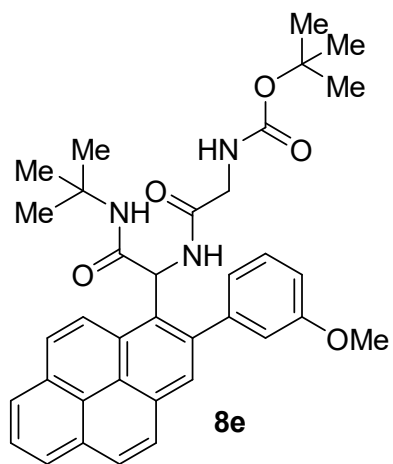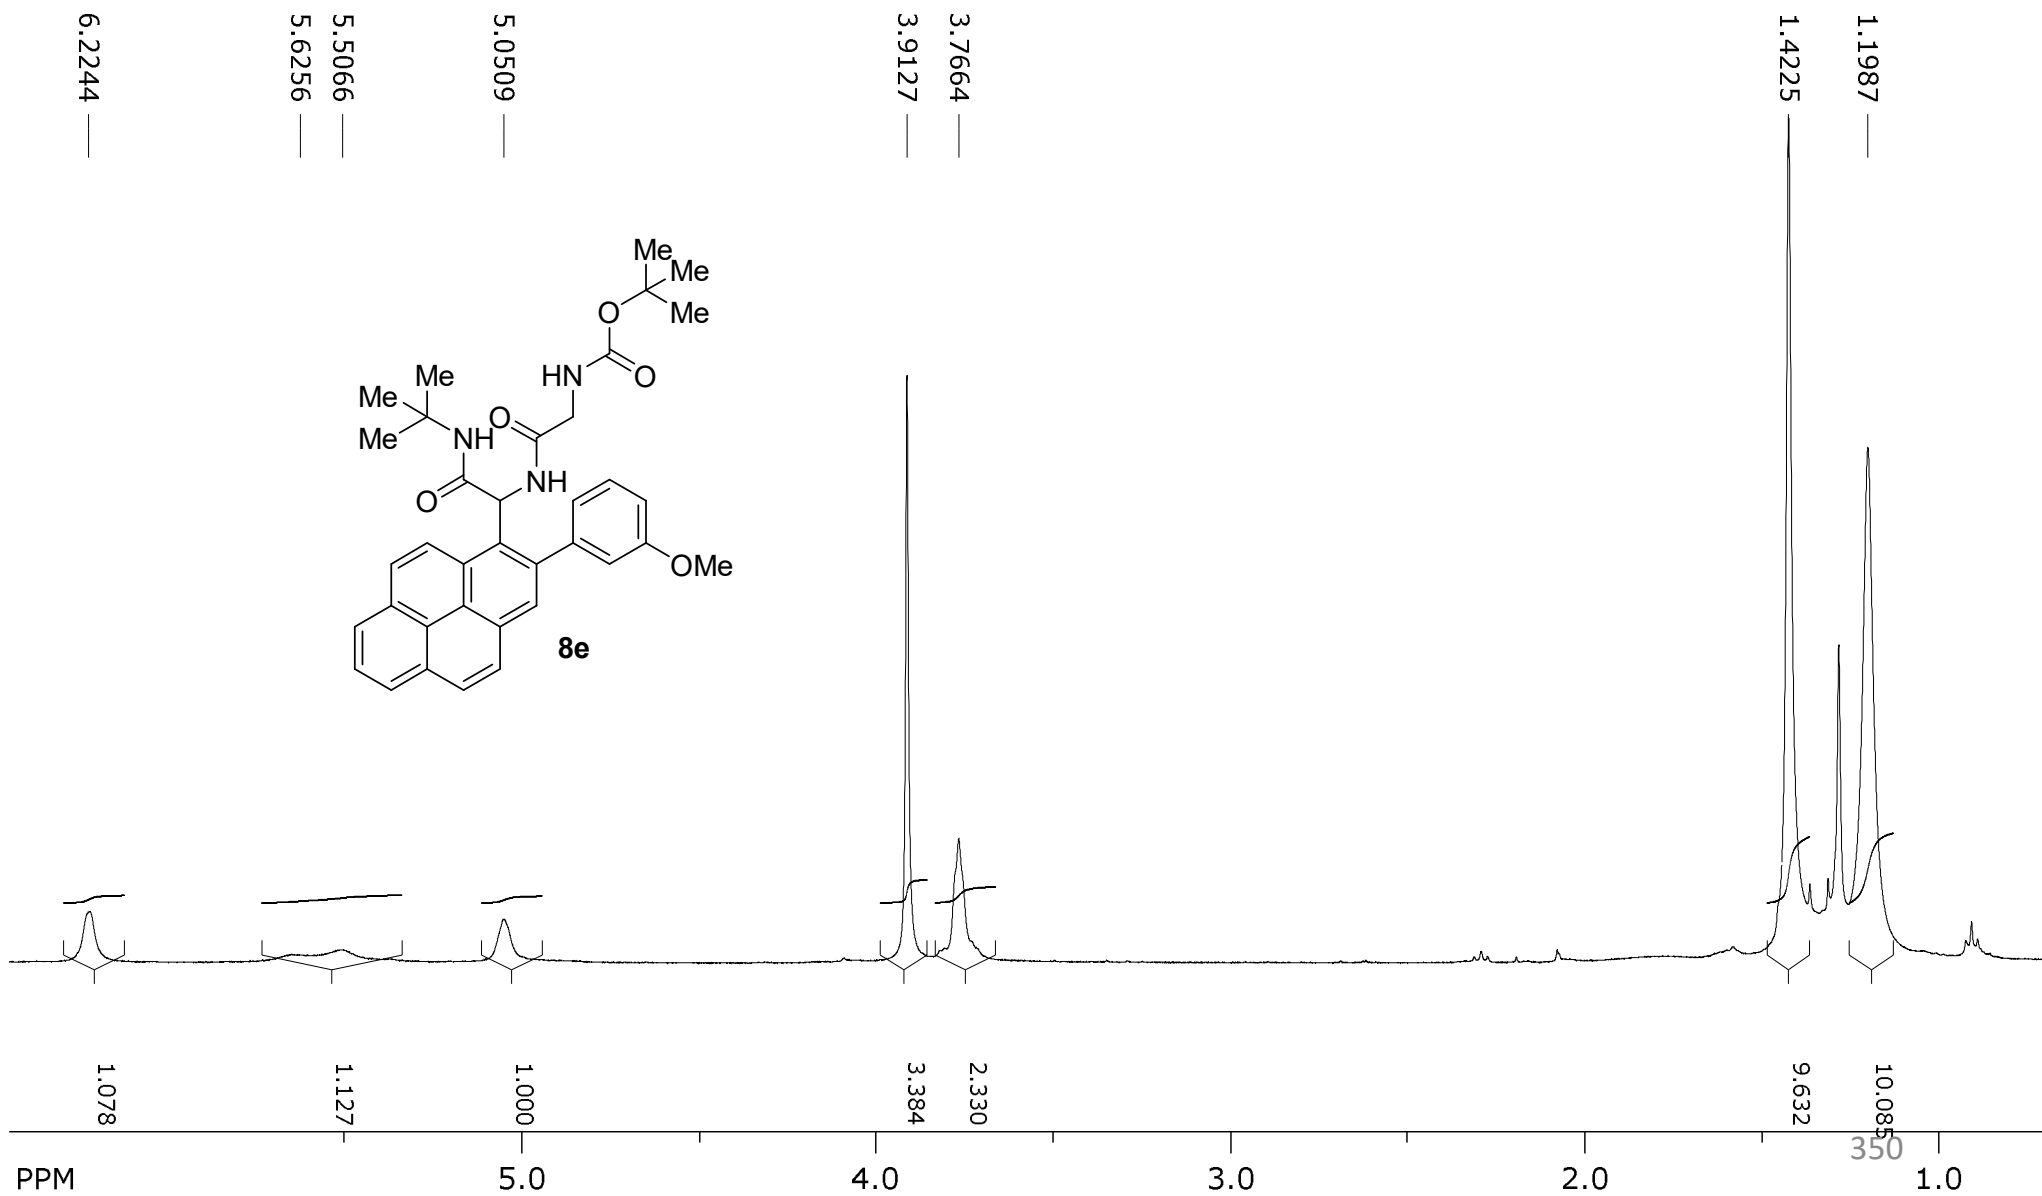

SpinWorks 4: SUB 216 RE  
PROTON CDCl3 /opt/topspin3.5pl2/nmrdata nmrsu 52

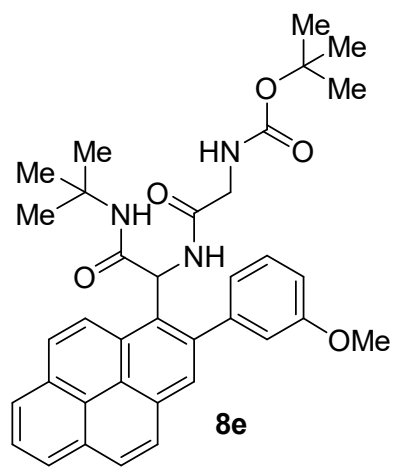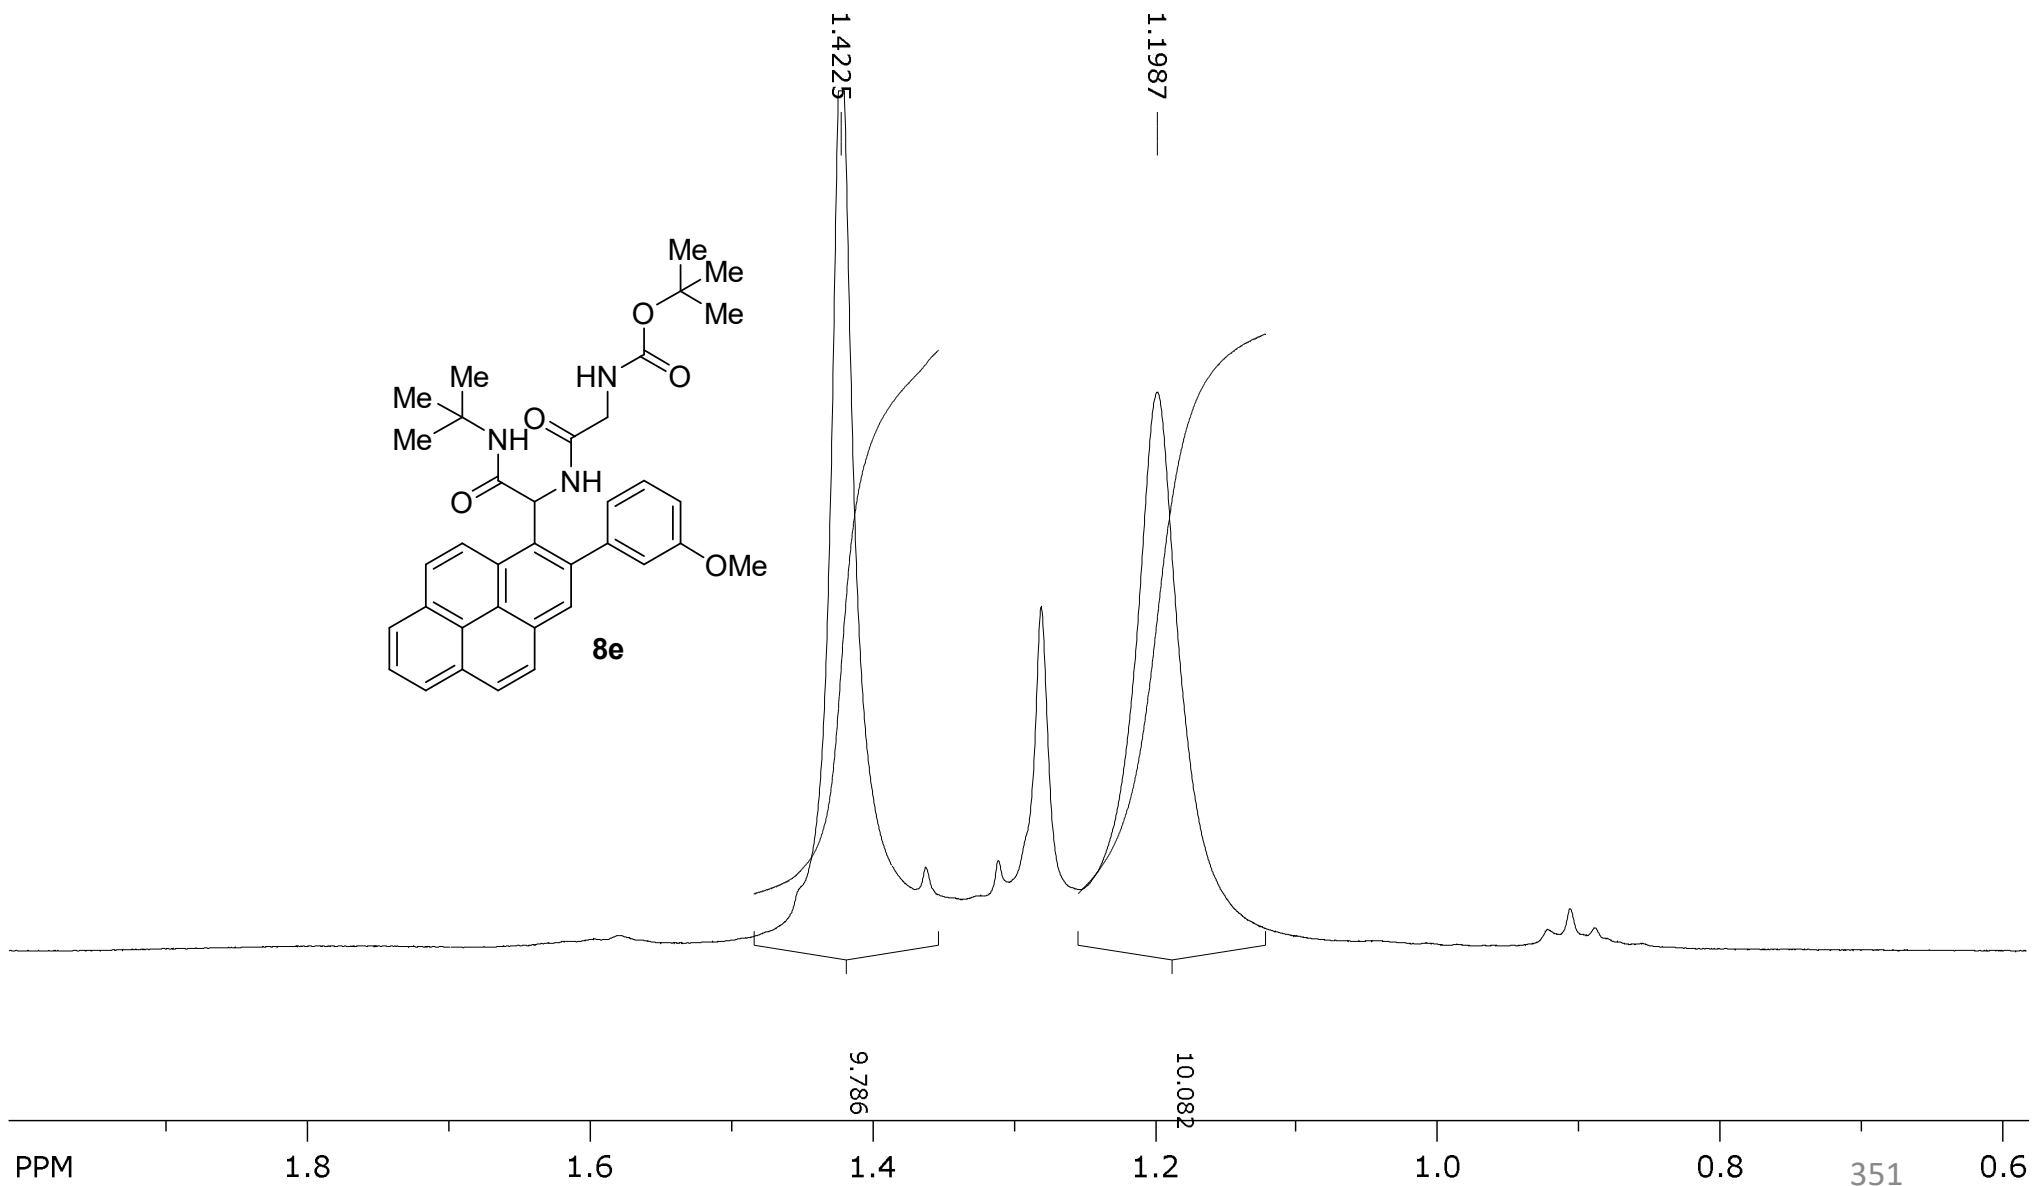

SpinWorks 4: SUB-216R

C13CPD256 CDCl3 /opt/topspin3.5pl2/nmrdata\_nmrstu\_42

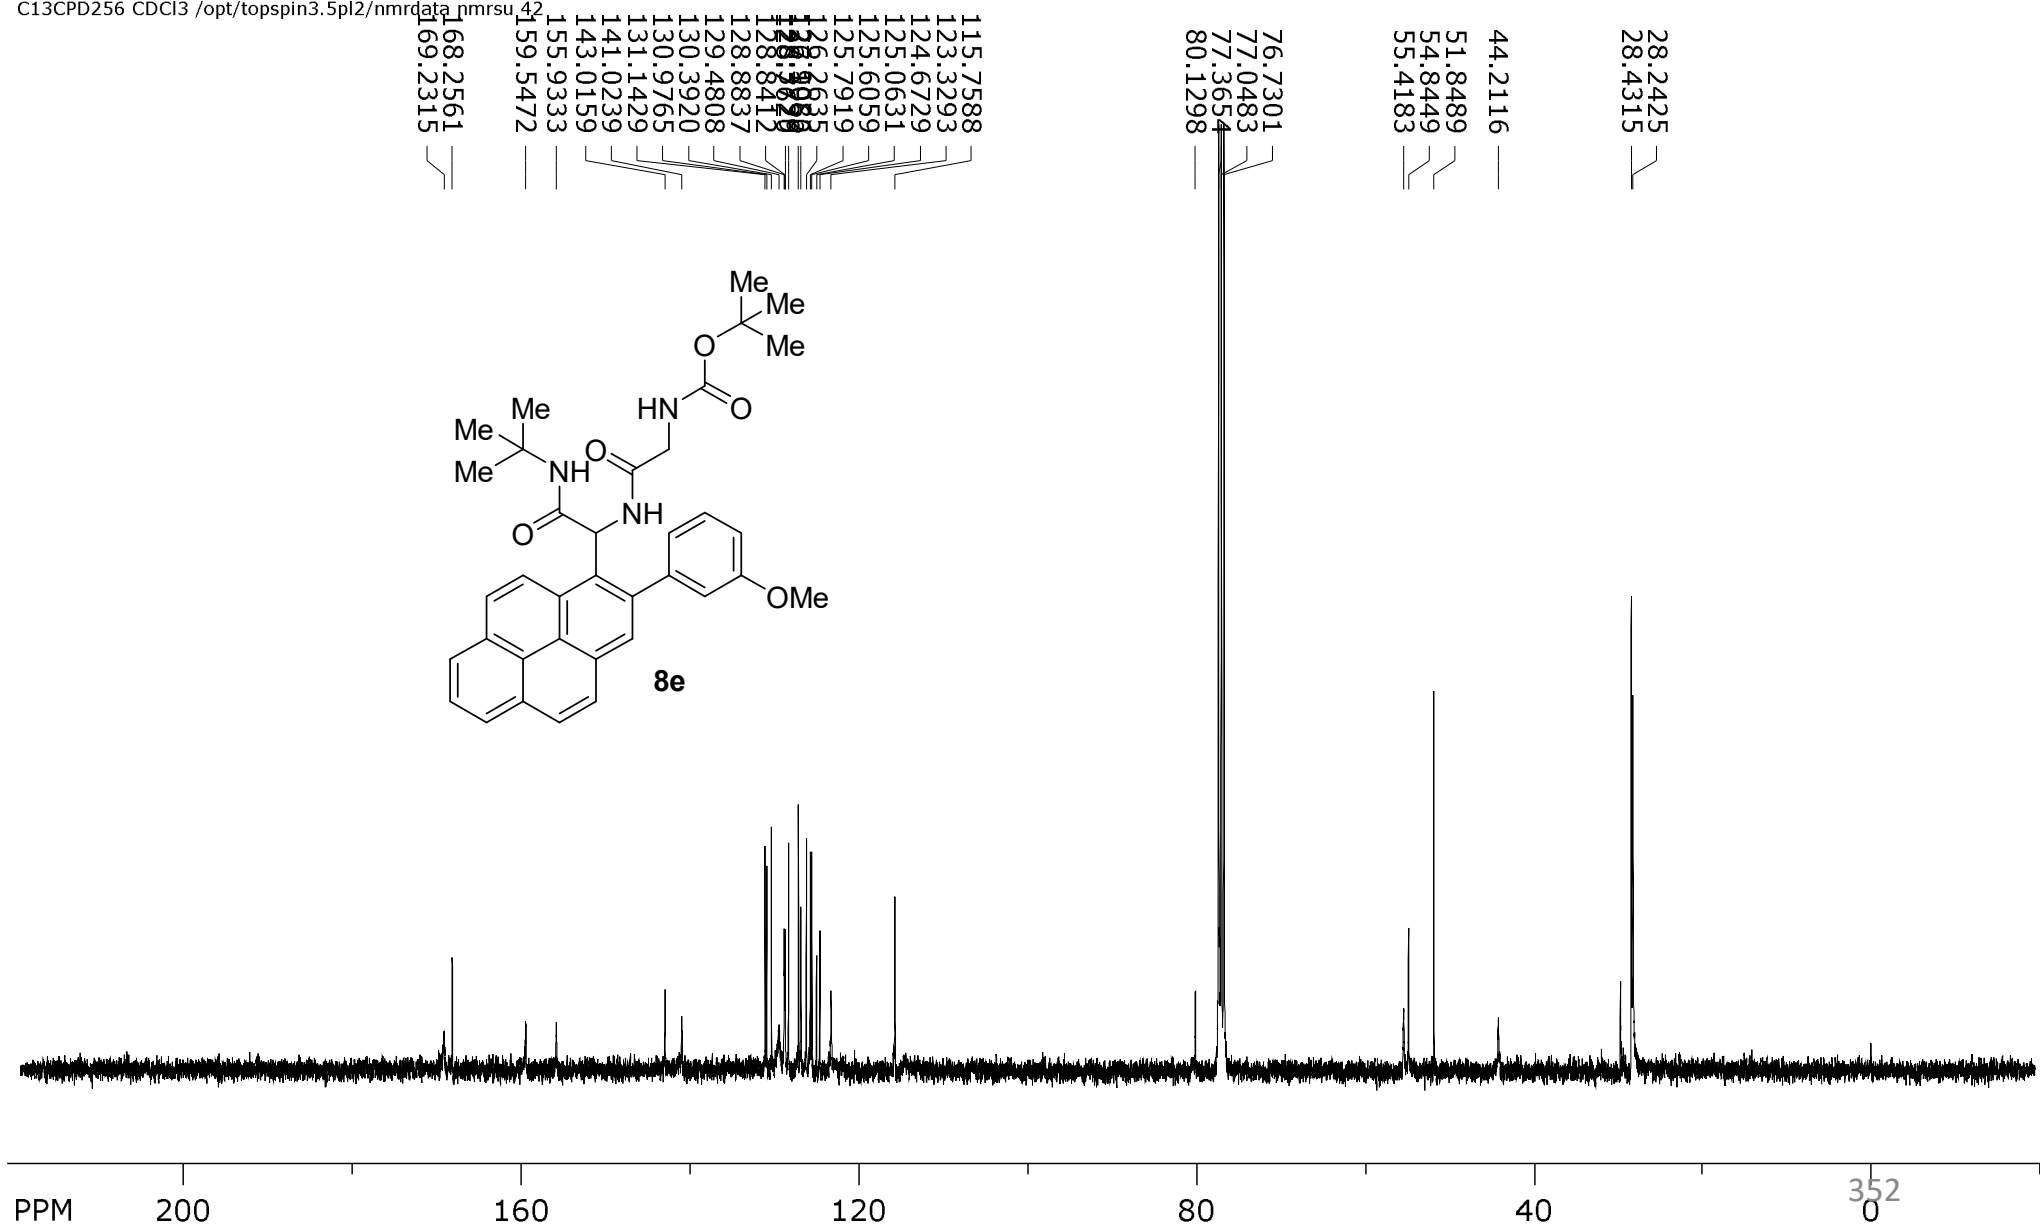



SpinWorks 4: SUB-216R  
C13CPD256 CDCl3 /opt/topspin3.5pl2/nmrdata nmrsu 42

159.5472

155.9333

143.0159

141.0239

123.3293  
124.6729  
125.0631  
125.6059  
125.7919  
126.2635  
126.9086  
127.1962  
128.3729  
128.7620  
128.8412  
128.8837  
129.4808  
130.3920  
130.9765  
131.1429

115.7588

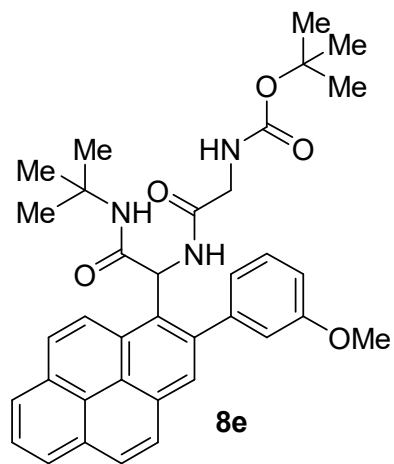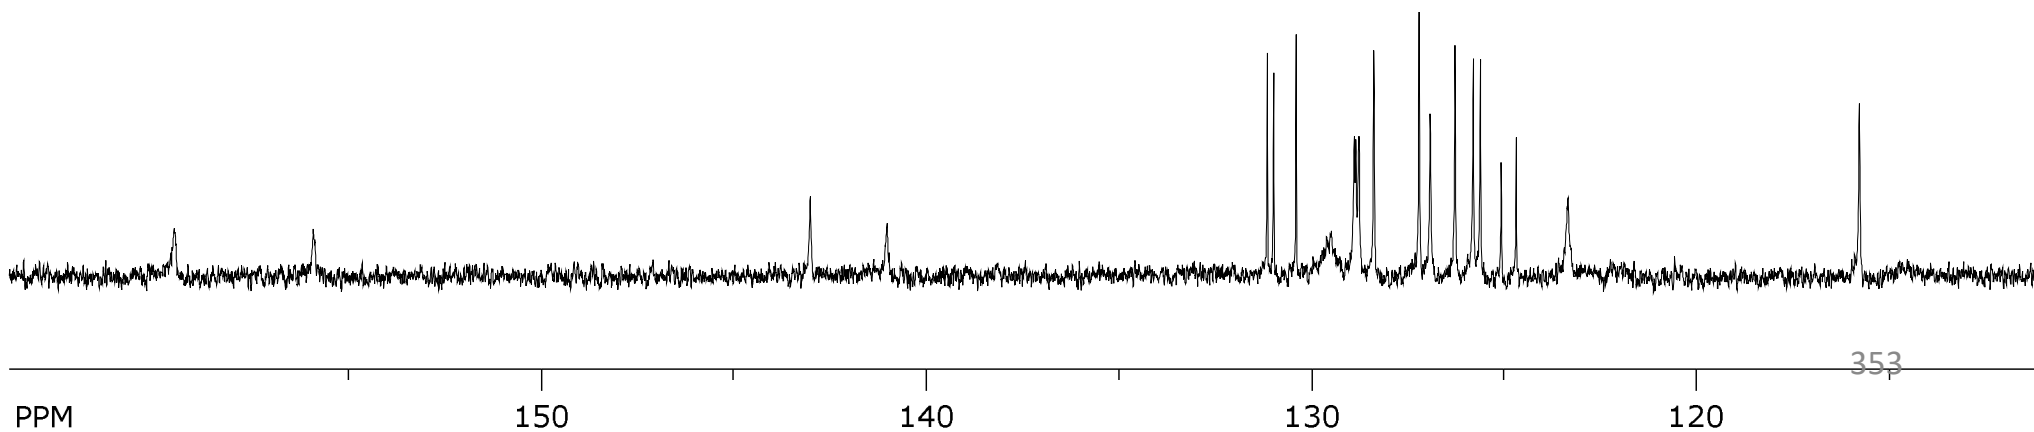

SpinWorks 4: SUB-216R  
C13CPD256 CDCl3 /opt/topspin3.5pl2/nmrdata nmrsu 42

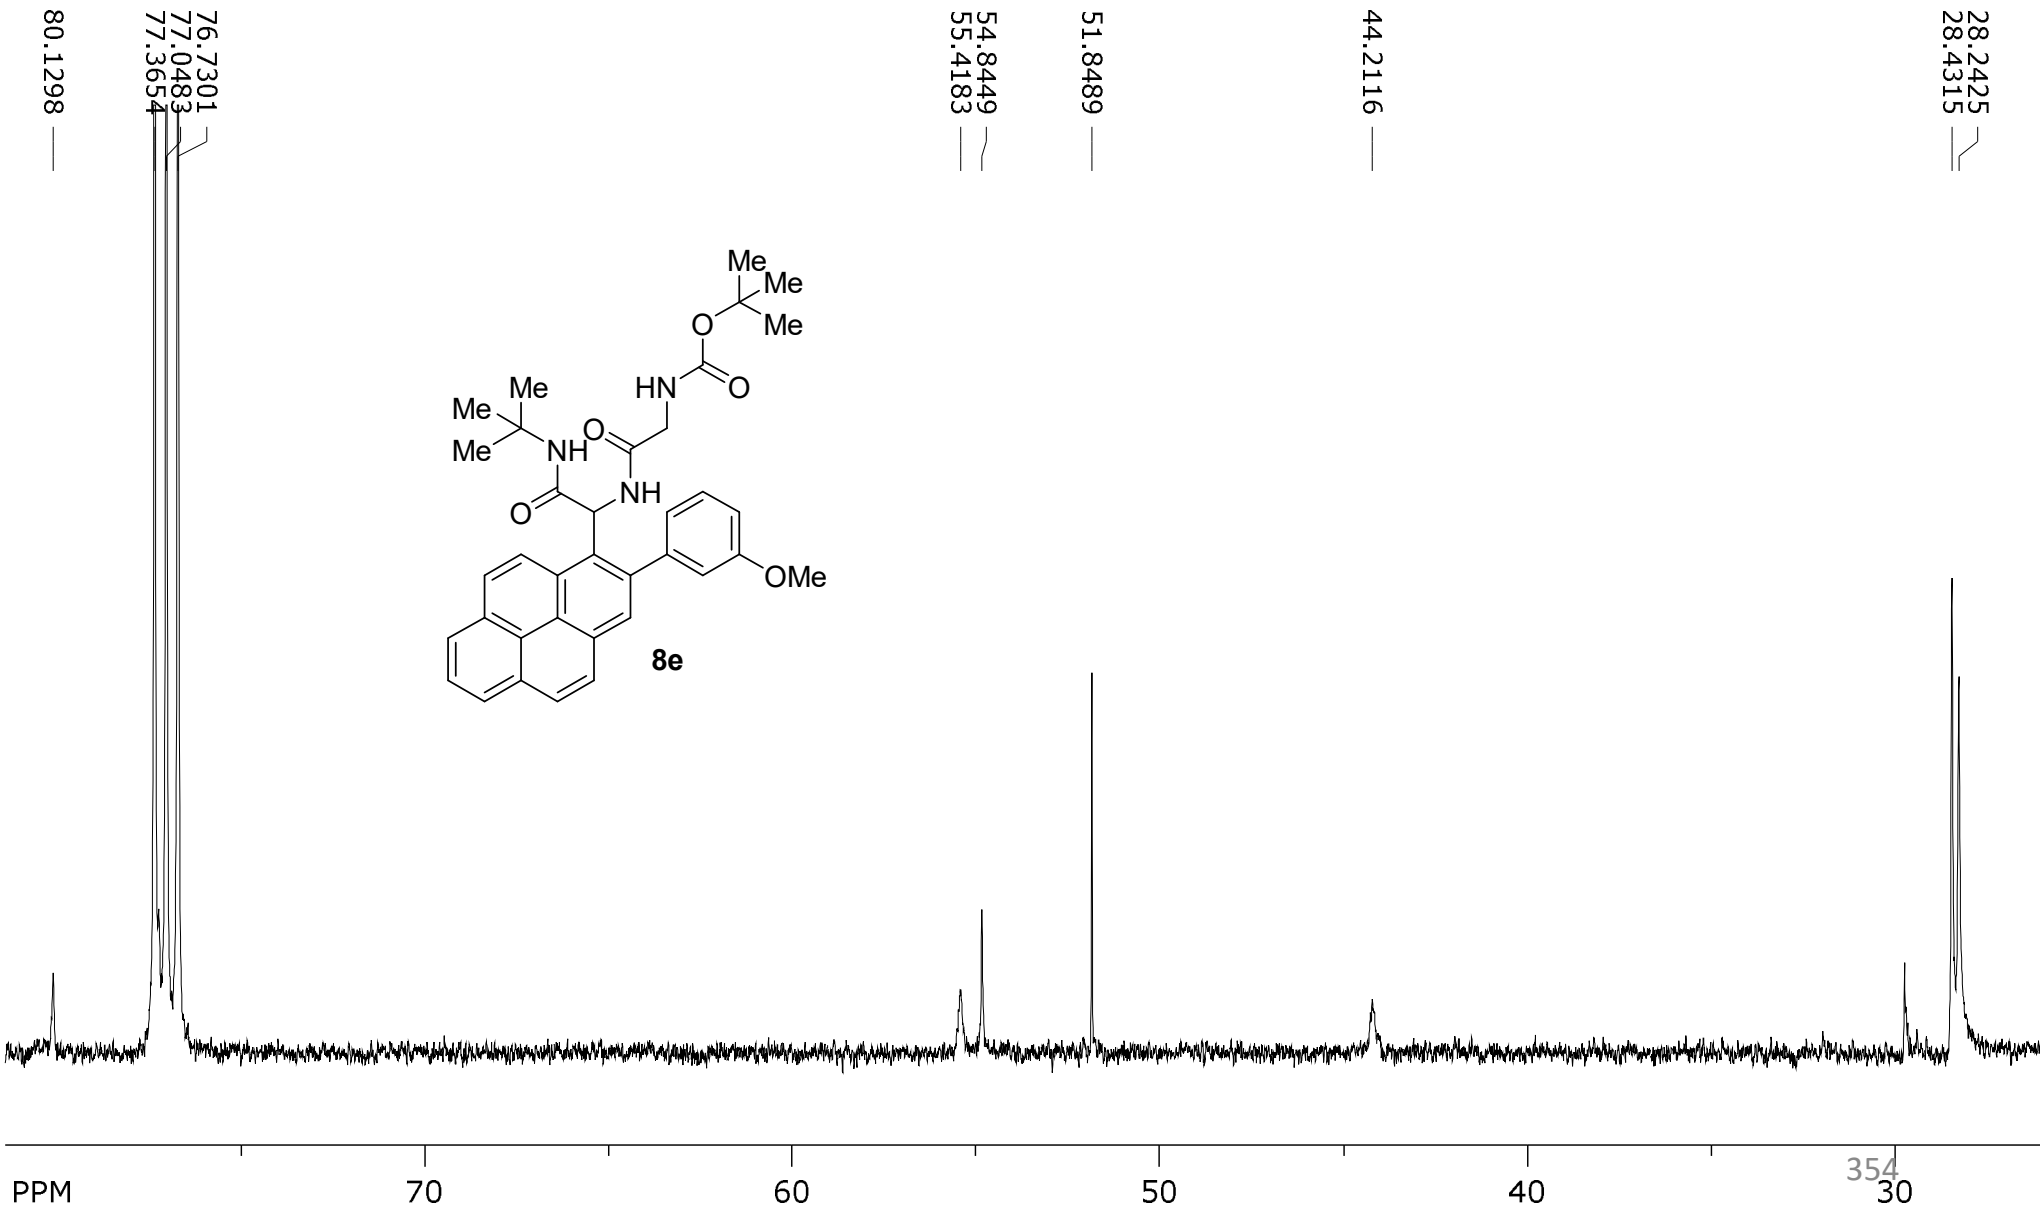

SpinWorks 4: AD-2074REP  
PROTON CDCl3 /opt/topspin3.5pl2/nmrdata nmrsu 39

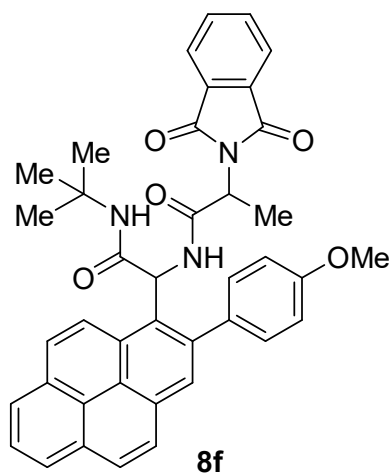

the compound exists as diastereomers

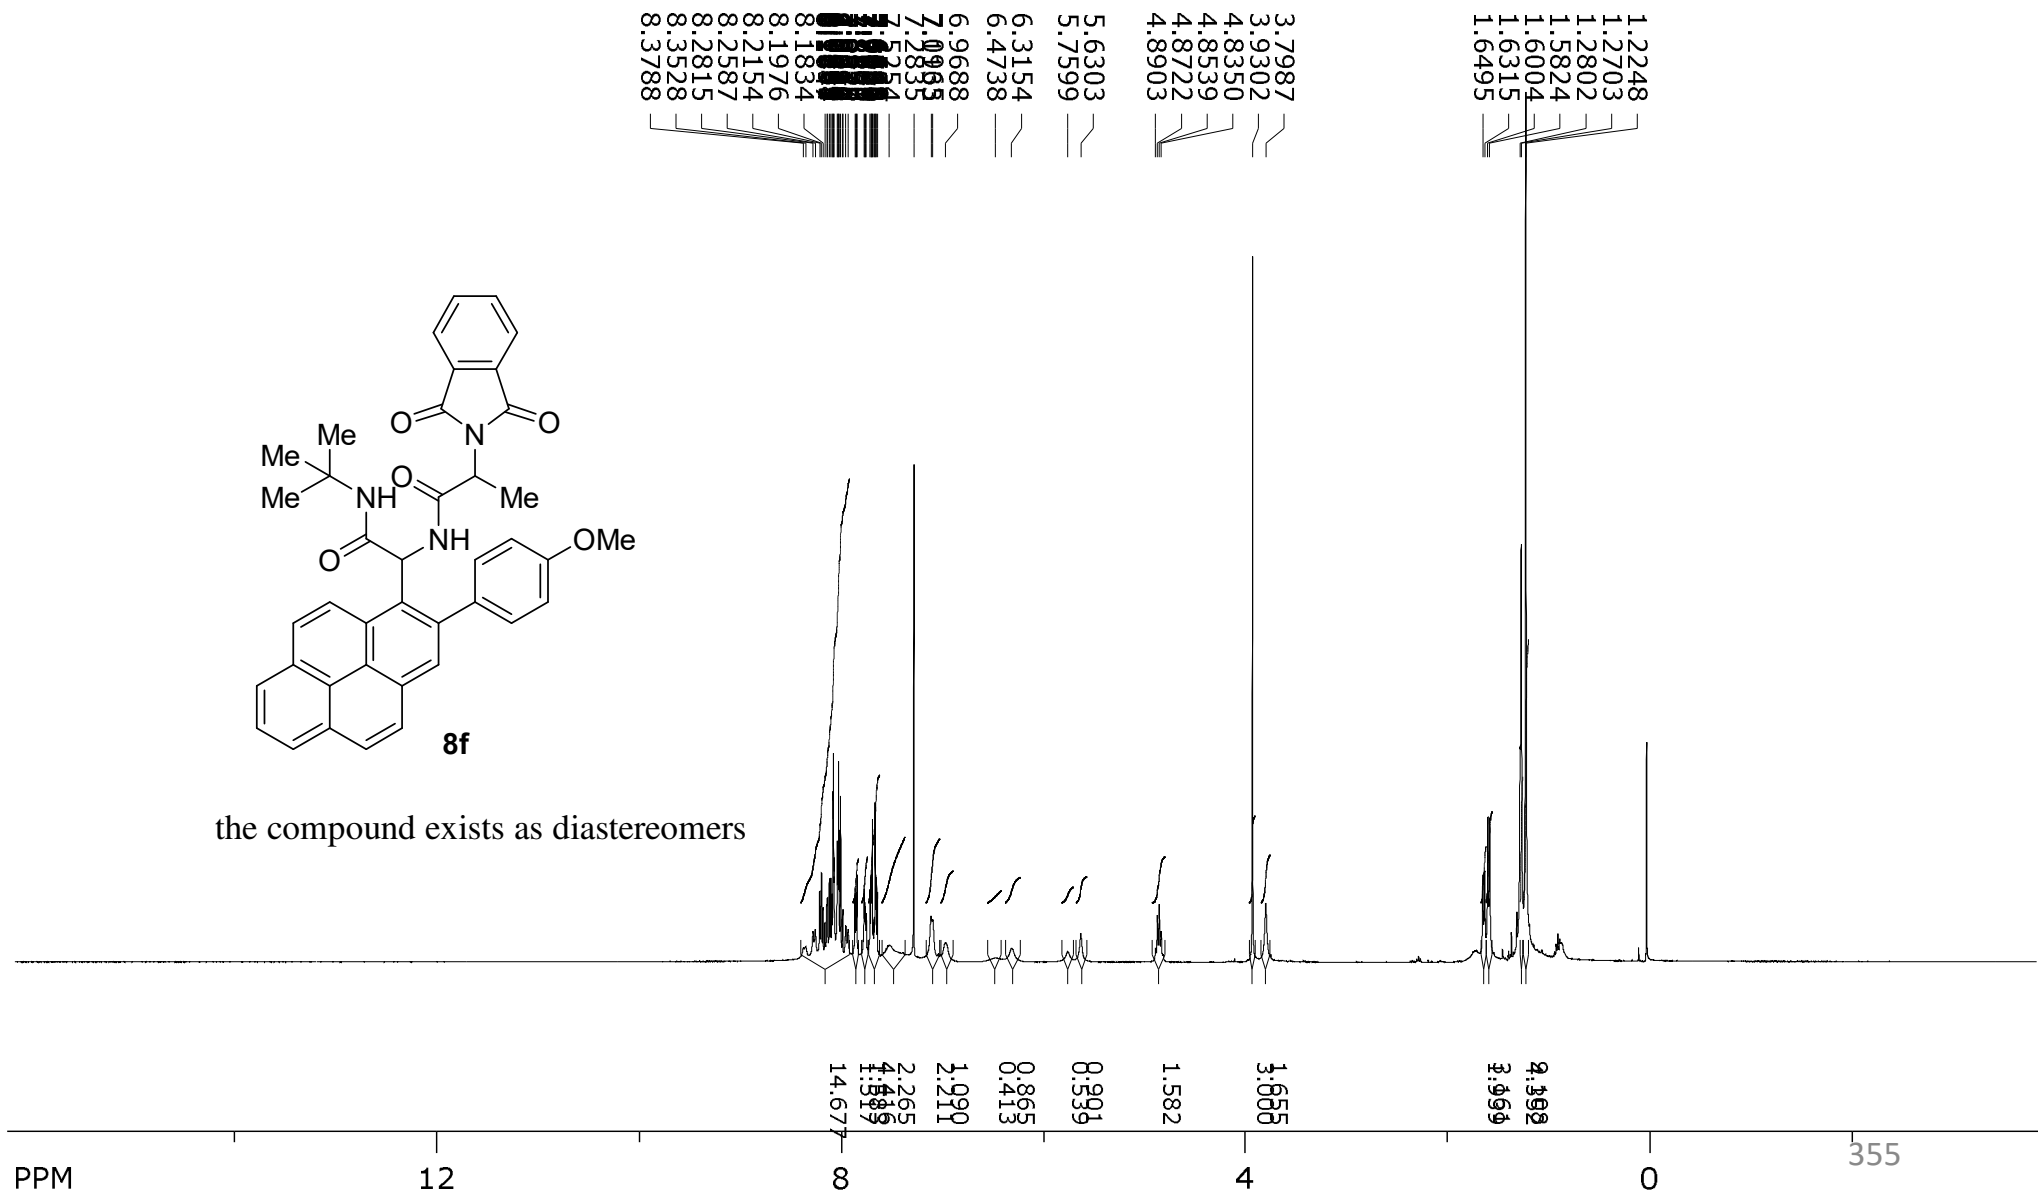

SpinWorks 4: AD-2074REP  
PROTON CDCl3 /opt/topspin3.5pl2/nmrdata nmrsu 39

8.3788 —  
8.3528 —  
8.2815 —  
8.2587 —  
8.2154 —  
8.1976 —  
8.1834 —  
8.1647 —  
8.1395 —  
8.1454 —  
8.1201 —  
8.1063 —  
8.0950 —  
8.0729 —  
8.0791 —  
8.0837 —  
8.0418 —  
8.0229 —  
8.0295 —  
8.0349 —  
8.0098 —  
7.9871 —  
7.9913 —  
7.9575 —  
7.9340 —

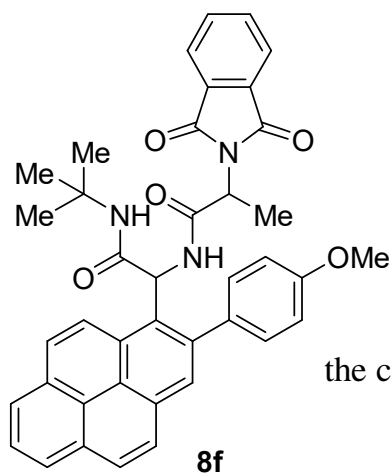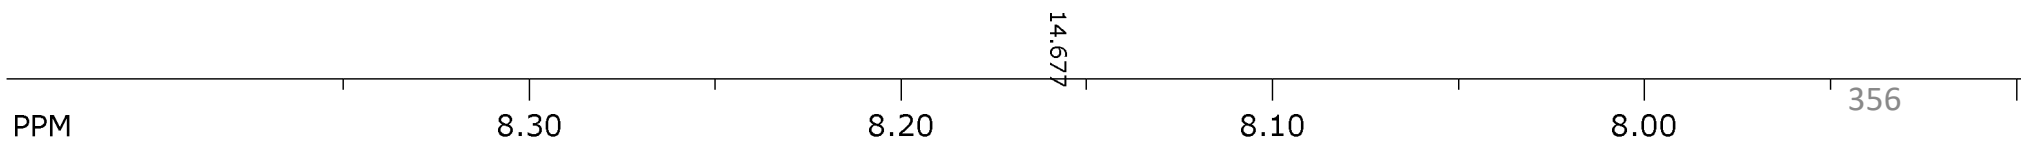

SpinWorks 4: AD-2074REP  
PROTON CDCl3 /opt/topspin3.5pl2/nmrdata nmrsu 39

7.8460  
7.8537  
7.8596  
7.8673

7.7545  
7.7621  
7.7681  
7.7756

7.6449  
7.6530  
7.6596  
7.6666  
7.6768  
7.6852  
7.6951  
7.7020  
7.7031  
7.7086  
7.7166

7.5254

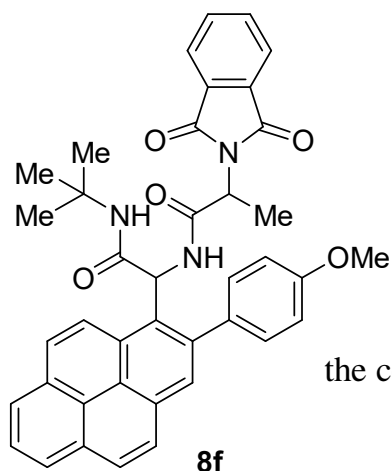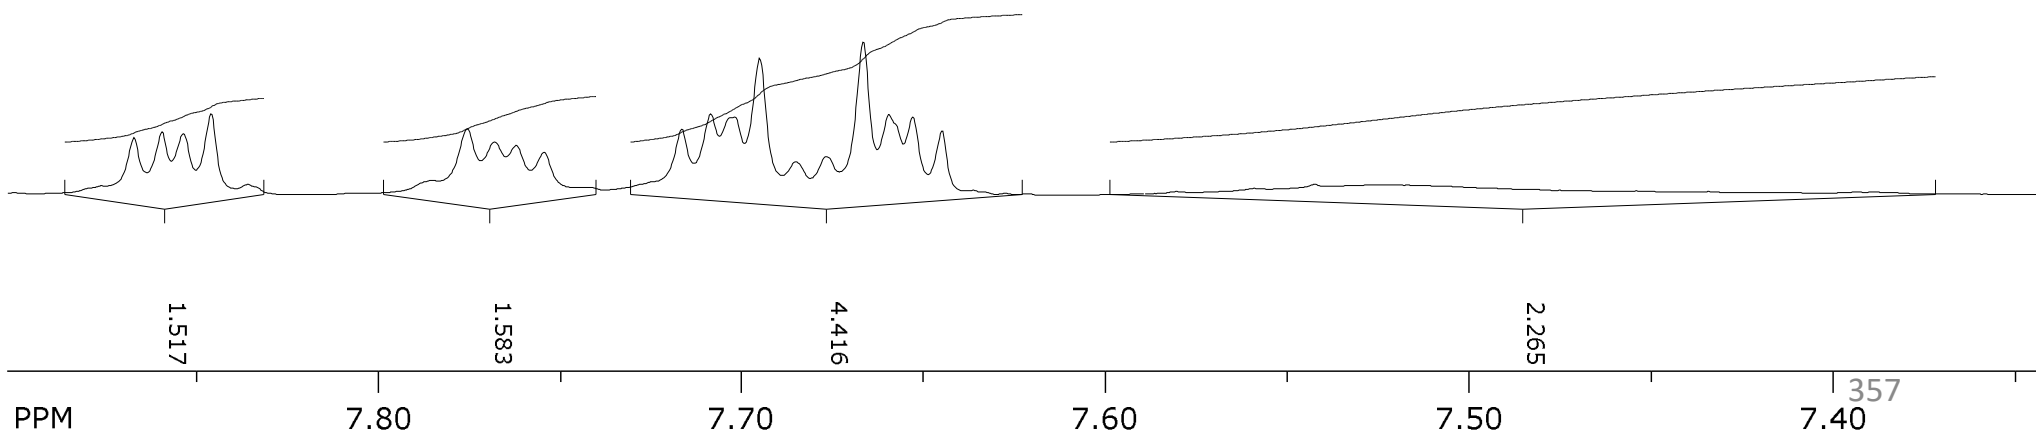

SpinWorks 4: AD-2074REP  
PROTON CDCl3 /opt/topspin3.5pl2/nmrdata nmrsu 39

7.0965  
7.1133

6.9688

6.4738

6.3154

5.7599

5.6303

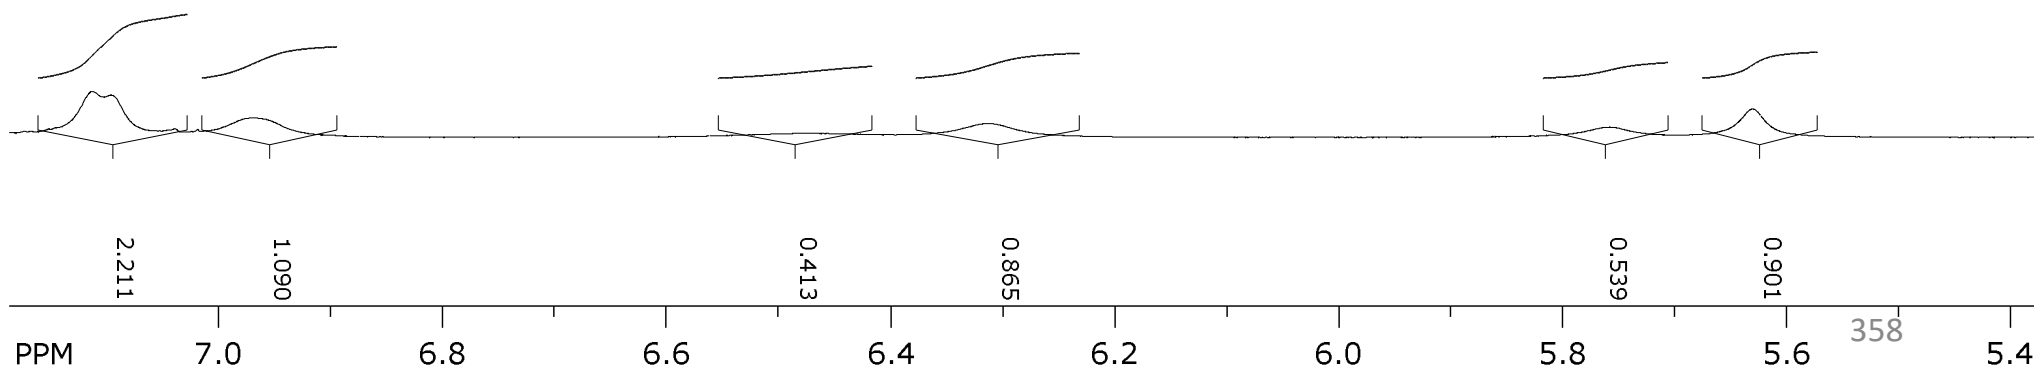

SpinWorks 4: AD-2074REP  
PROTON CDCl3 /opt/topspin3.5pl2/nmrdata nmrsu 39

4.8350  
4.8539  
4.8722  
4.8903

3.9302

3.7987

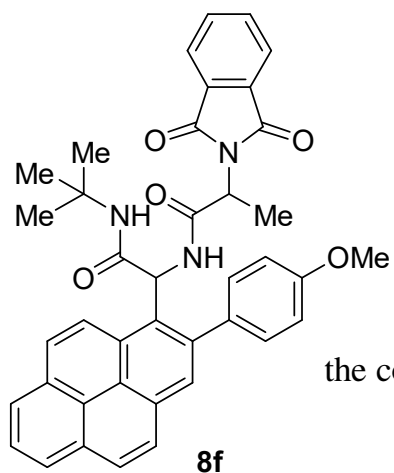

the compound exists as diastereomers

1.582

3.000

1.655

PPM 5.0 4.8 4.6 4.4 4.2 4.0 3.8 3.6

SpinWorks 4: AD-2074REP  
PROTON CDCl3 /opt/topspin3.5pl2/nmrdata nmrsu 39

1.5824  
1.6004  
1.6495  
1.6315

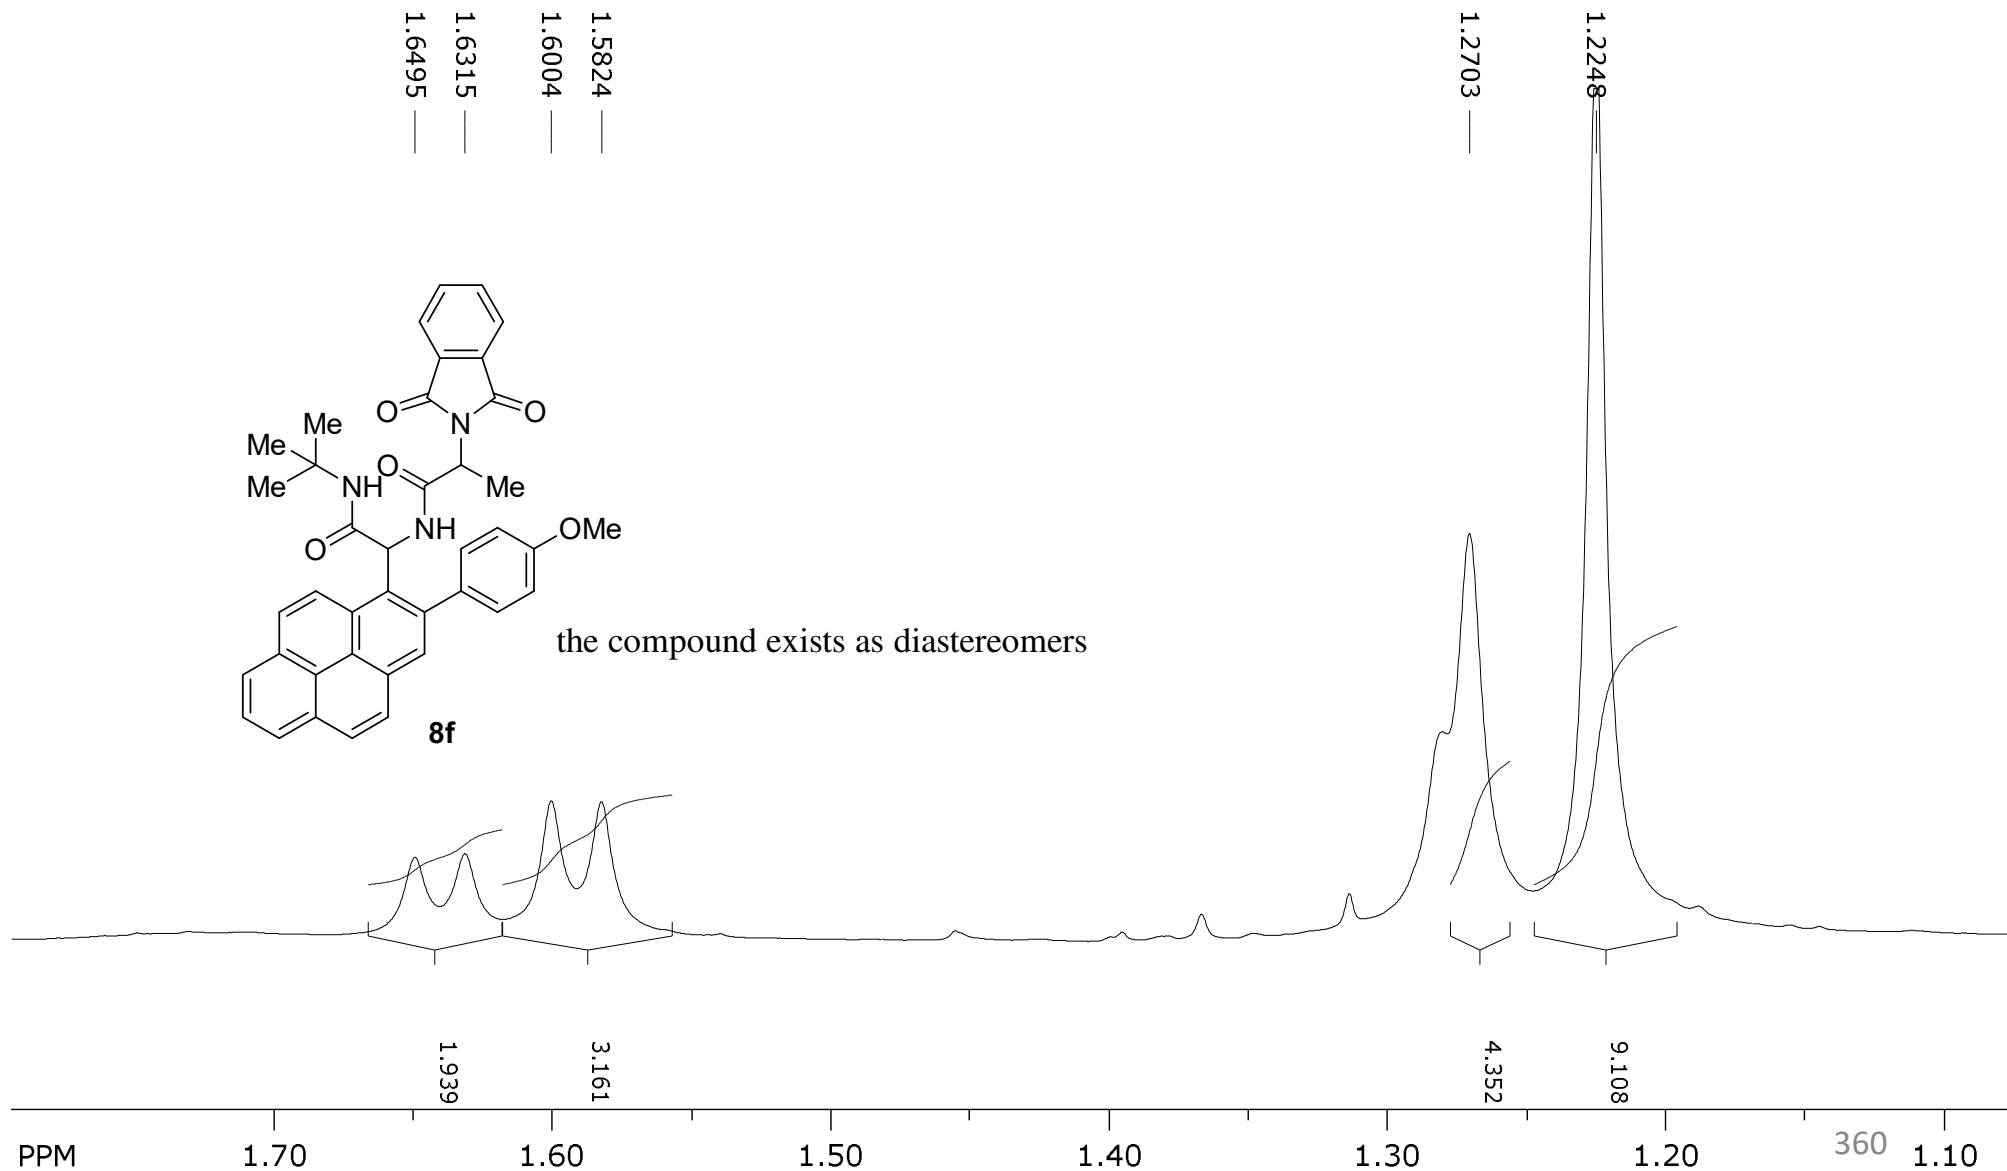





SpinWorks 4: AD-2074REP  
C13CPD256 CDCl3 /opt/topspin3.5pl2/nmrdata nmrsu 39

169.267  
169.374  
167.439  
167.637  
167.887  
168.183

159.093  
159.266

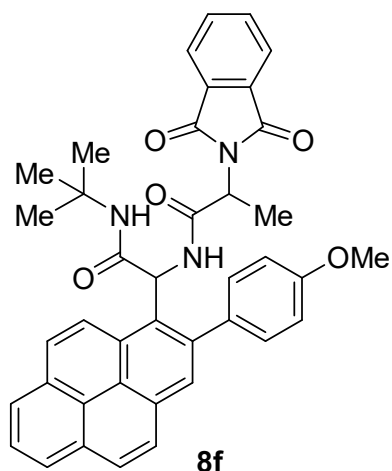

**8f**

the compound exists as diastereomers

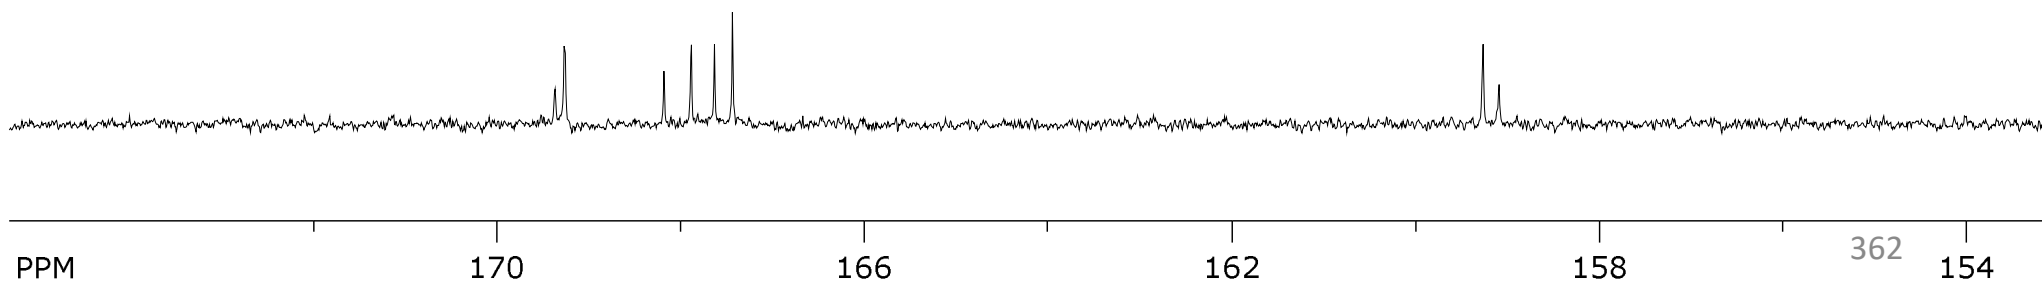

SpinWorks 4: AD-2074REP  
C13CPD256 CDCl3 /opt/topspin3.5pl2/nmrdata nmrsu 39

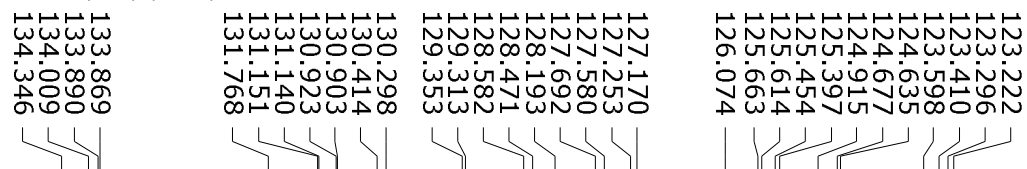

114.015



the compound exists as diastereomers

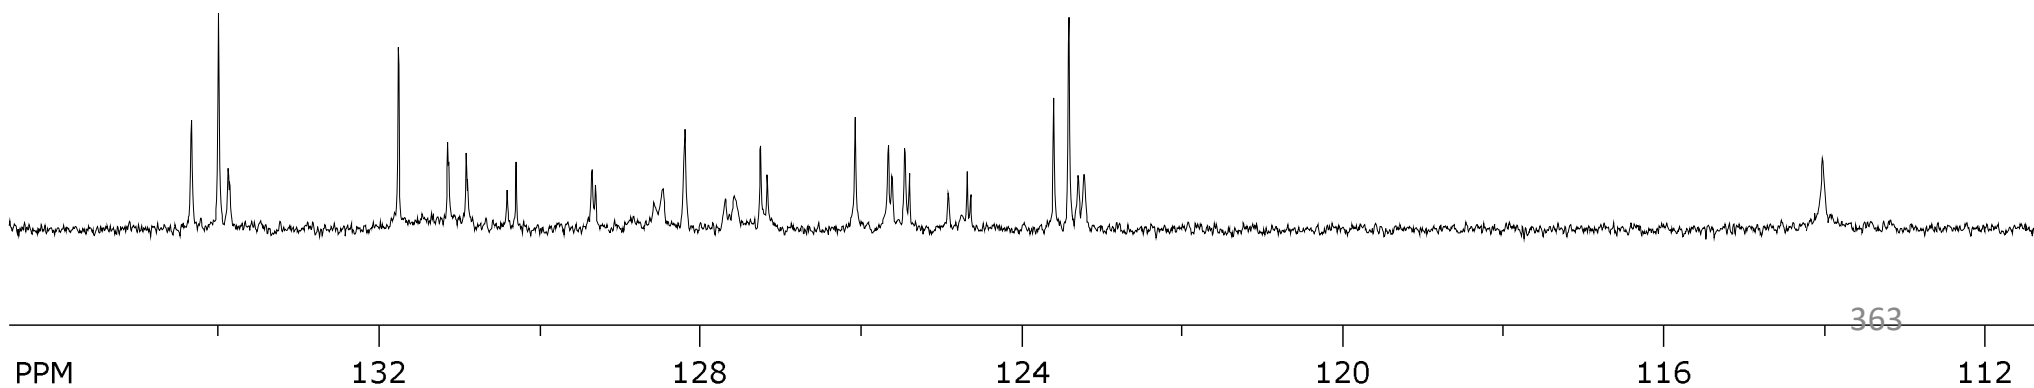

SpinWorks 4: AD-2074REP  
C13CPD256 CDCl3 /opt/topspin3.5pl2/nmrdata nmrsu 39

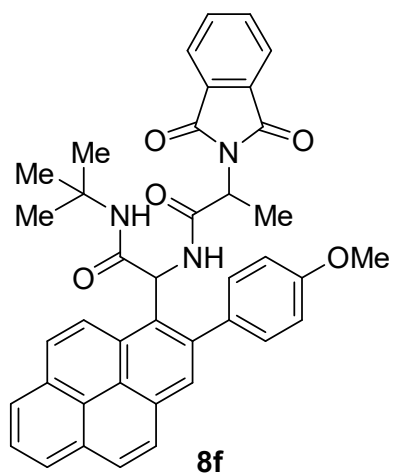

**8f**

the compound exists as diastereomers

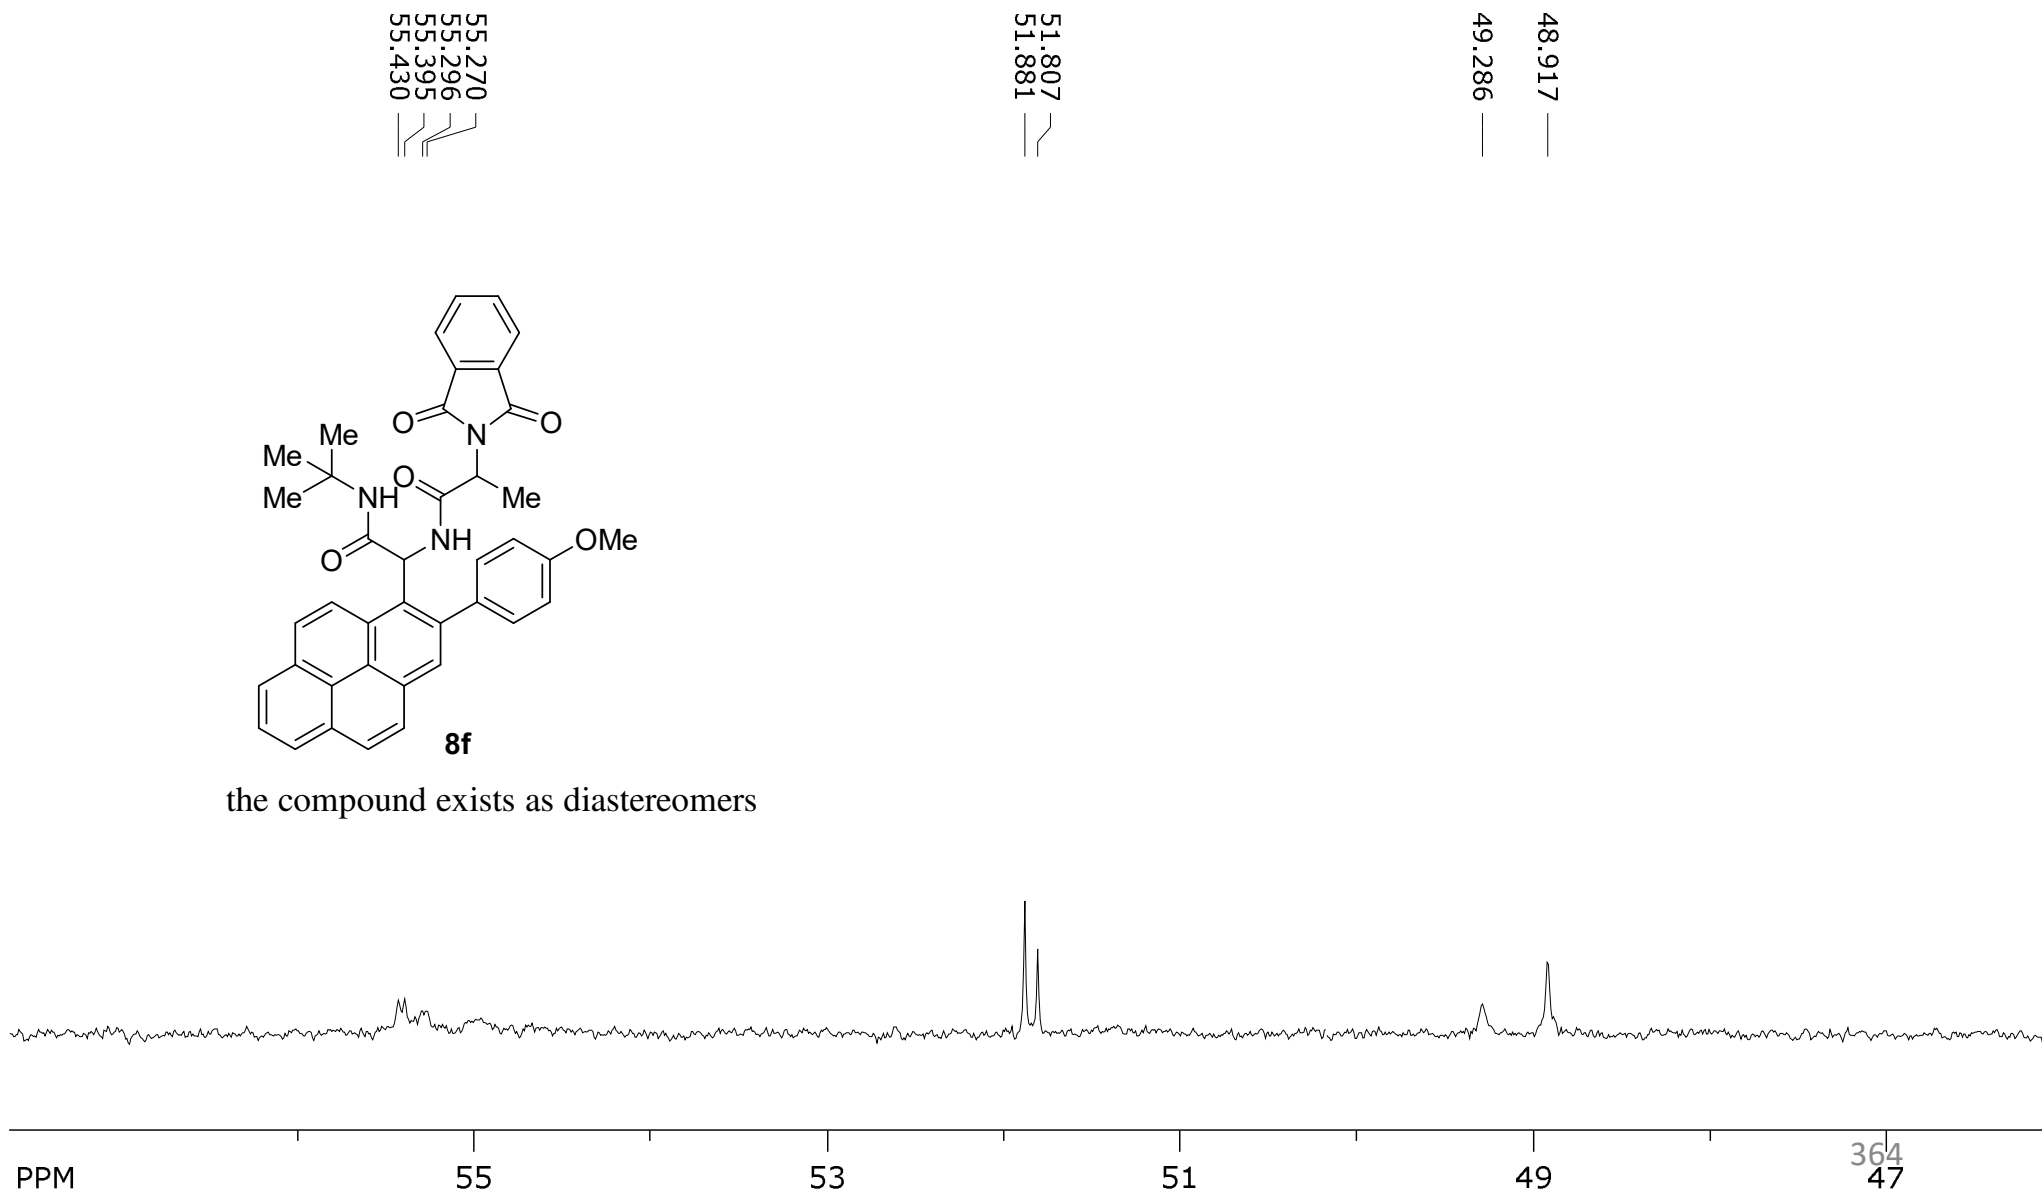

SpinWorks 4: AD-2074REP  
C13CPD256 CDCl3 /opt/topspin3.5pl2/nmrdata nmrsu 39

28.482  
28.505

14.966  
15.283



the compound exists as diastereomers

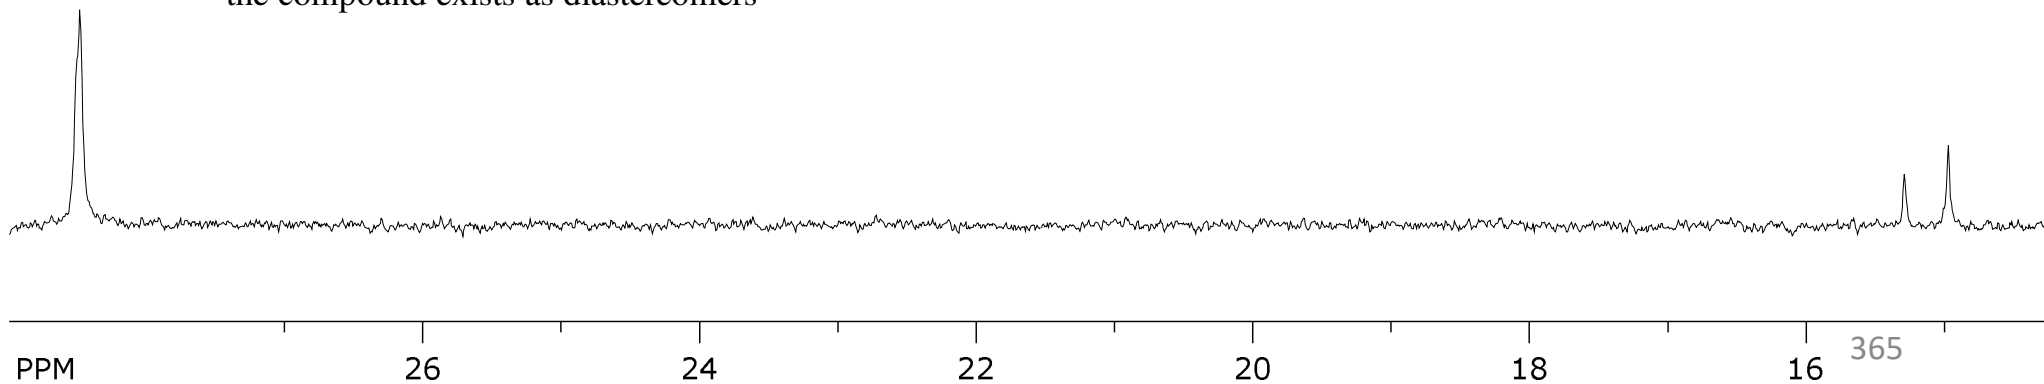

SpinWorks 4: AD 2083  
PROTON CDCl3 /opt/topspin3.5pl2/nmrdata nmrsu 42

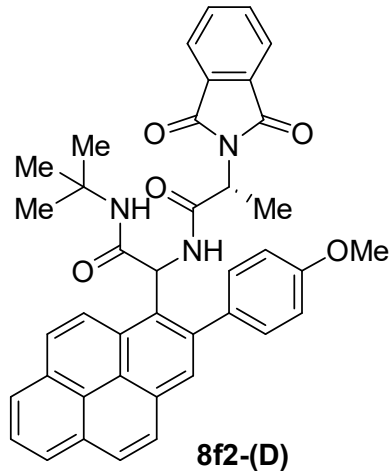

the compound exists as diastereomers

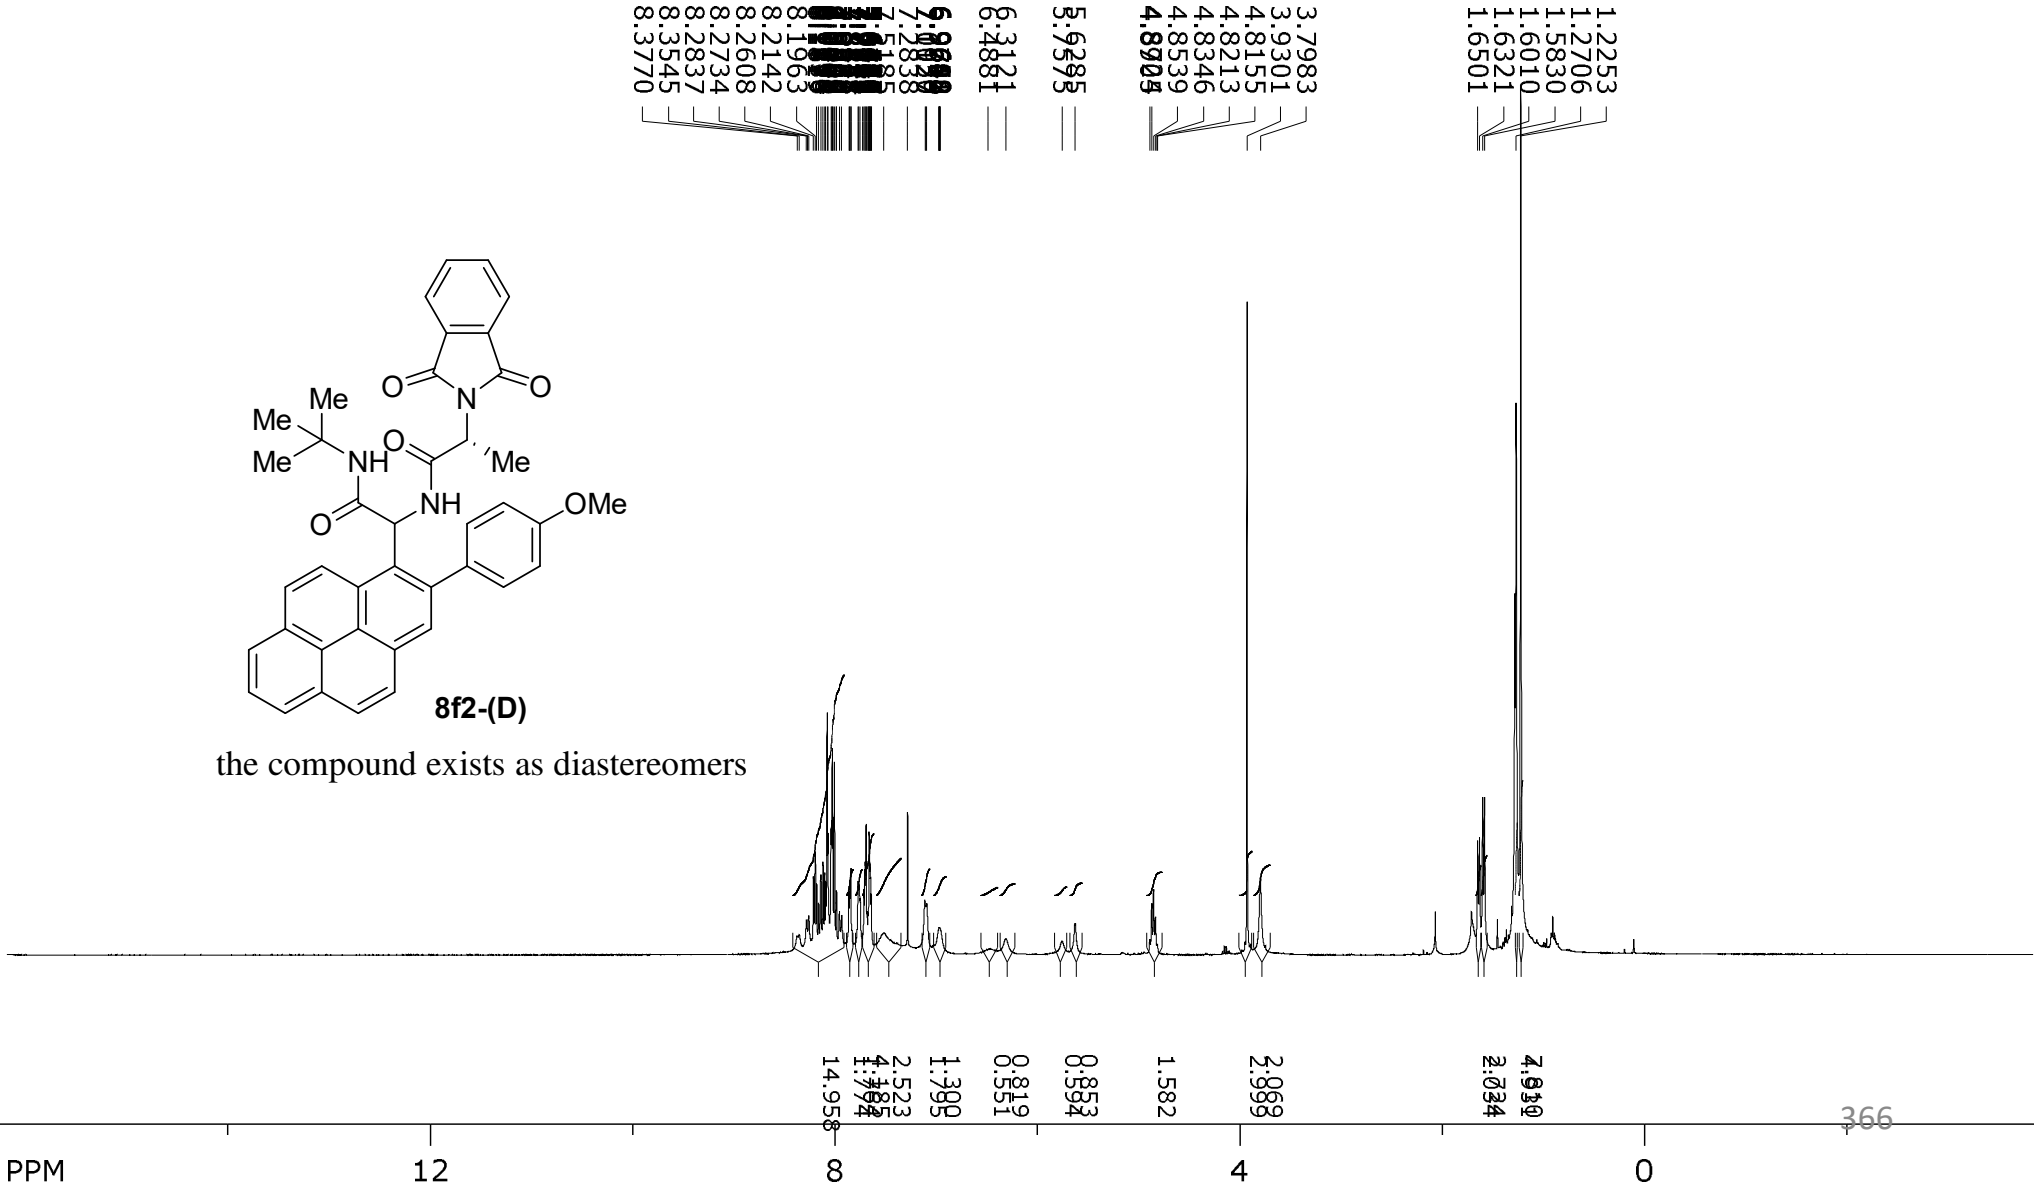

SpinWorks 4: AD 2083  
PROTON CDCl3 /opt/topspin3.5pl2/nmrdata nmrsu 42

8.3770 —  
8.3545 —  
8.2837 —  
8.2734 —  
8.2608 —  
8.2142 —  
8.1963 —  
8.1819 —  
8.1636 —  
8.1395 —  
8.1194 —  
8.1050 —  
8.0934 —  
8.0715 —  
8.0791 —  
8.0408 —  
8.0225 —  
8.0286 —  
8.0349 —  
8.0083 —  
7.9862 —  
7.9899 —  
7.9580 —  
7.9352 —

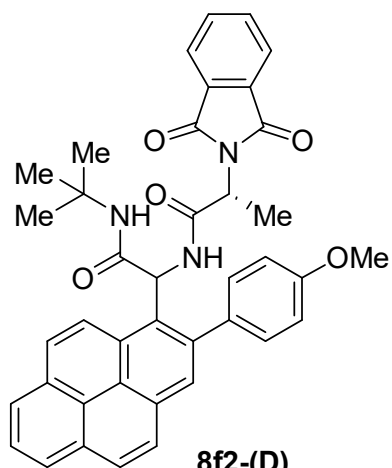

the compound exists as diastereomers

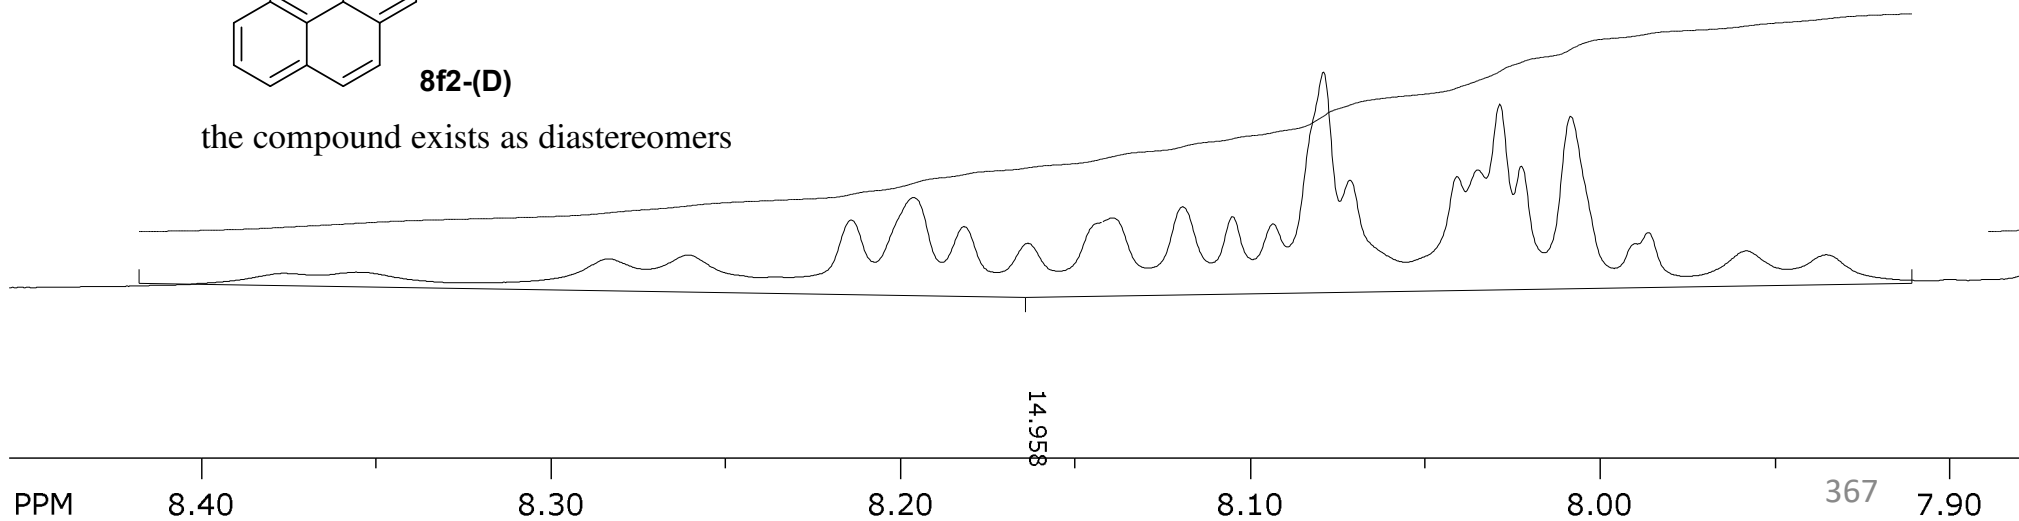

SpinWorks 4: AD 2083  
PROTON CDCl3 /opt/topspin3.5pl2/nmrdata nmrsu 42

7.8441  
7.8457  
7.8528  
7.8573  
7.8651  
  
7.7543  
7.7643  
7.7724  
  
7.7309  
7.7151  
7.7069  
7.7021  
7.6941  
7.6843  
7.6749  
7.6732  
7.6635  
7.6599  
7.6570  
7.6533  
7.6502  
7.6447  
7.6421  
  
7.5185

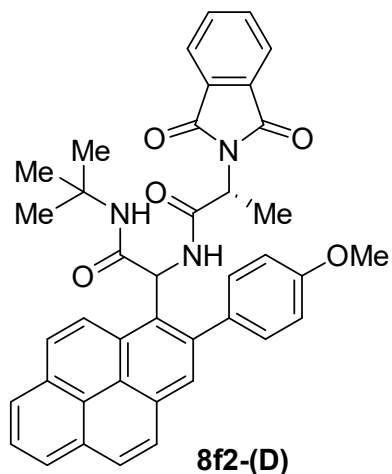

the compound exists as diastereomers

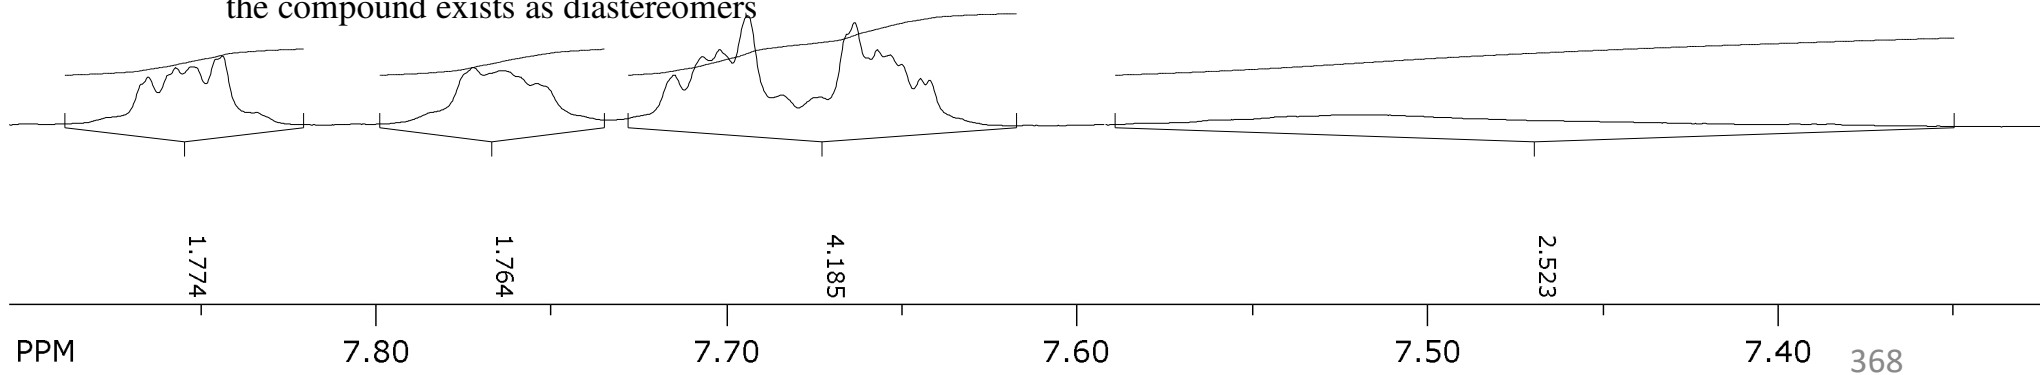



SpinWorks 4: AD 2083  
PROTON CDCl3 /opt/topspin3.5pl2/nmrdata nmrsu 42

7.0950  
7.1029  
7.1127

6.9610  
6.9642  
6.9658  
6.9680  
6.9698  
6.9711  
6.9728  
6.9752

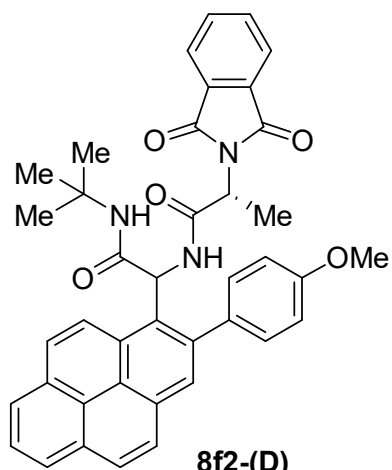

the compound exists as diastereomers

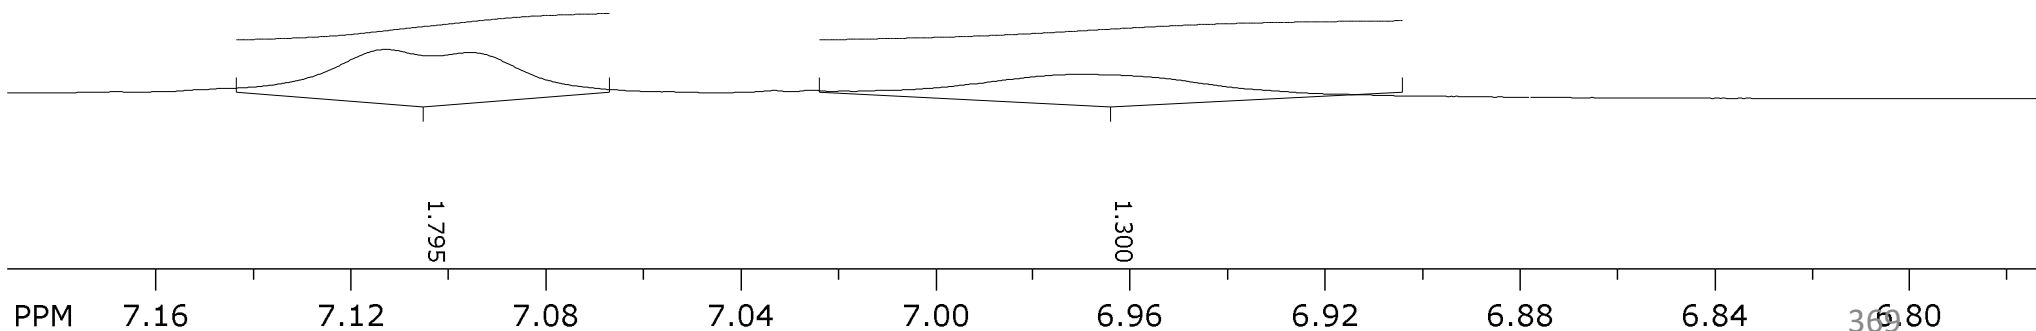

PPM 7.16 7.12 7.08 7.04 7.00 6.96 6.92 6.88 6.84 6.80

SpinWorks 4: AD 2083  
PROTON CDCl3 /opt/topspin3.5pl2/nmrdata nmrsu 42

6.4881 —  
6.3121 —  
5.7575 —  
5.6285 —  
4.8155 —  
4.8213 —  
4.8346 —  
4.8539 —  
4.8724 —  
4.8905 —  
3.9301 —  
3.7983 —



the compound exists as diastereomers

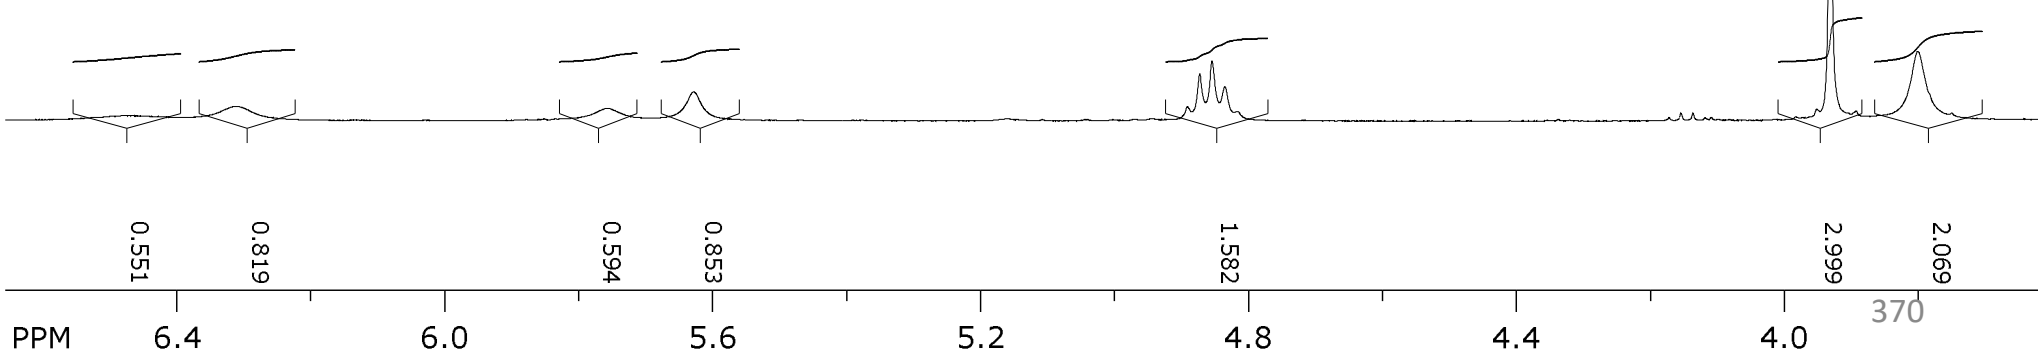

SpinWorks 4: AD 2083  
PROTON CDCl3 /opt/topspin3.5pl2/nmrdata nmrsu 42

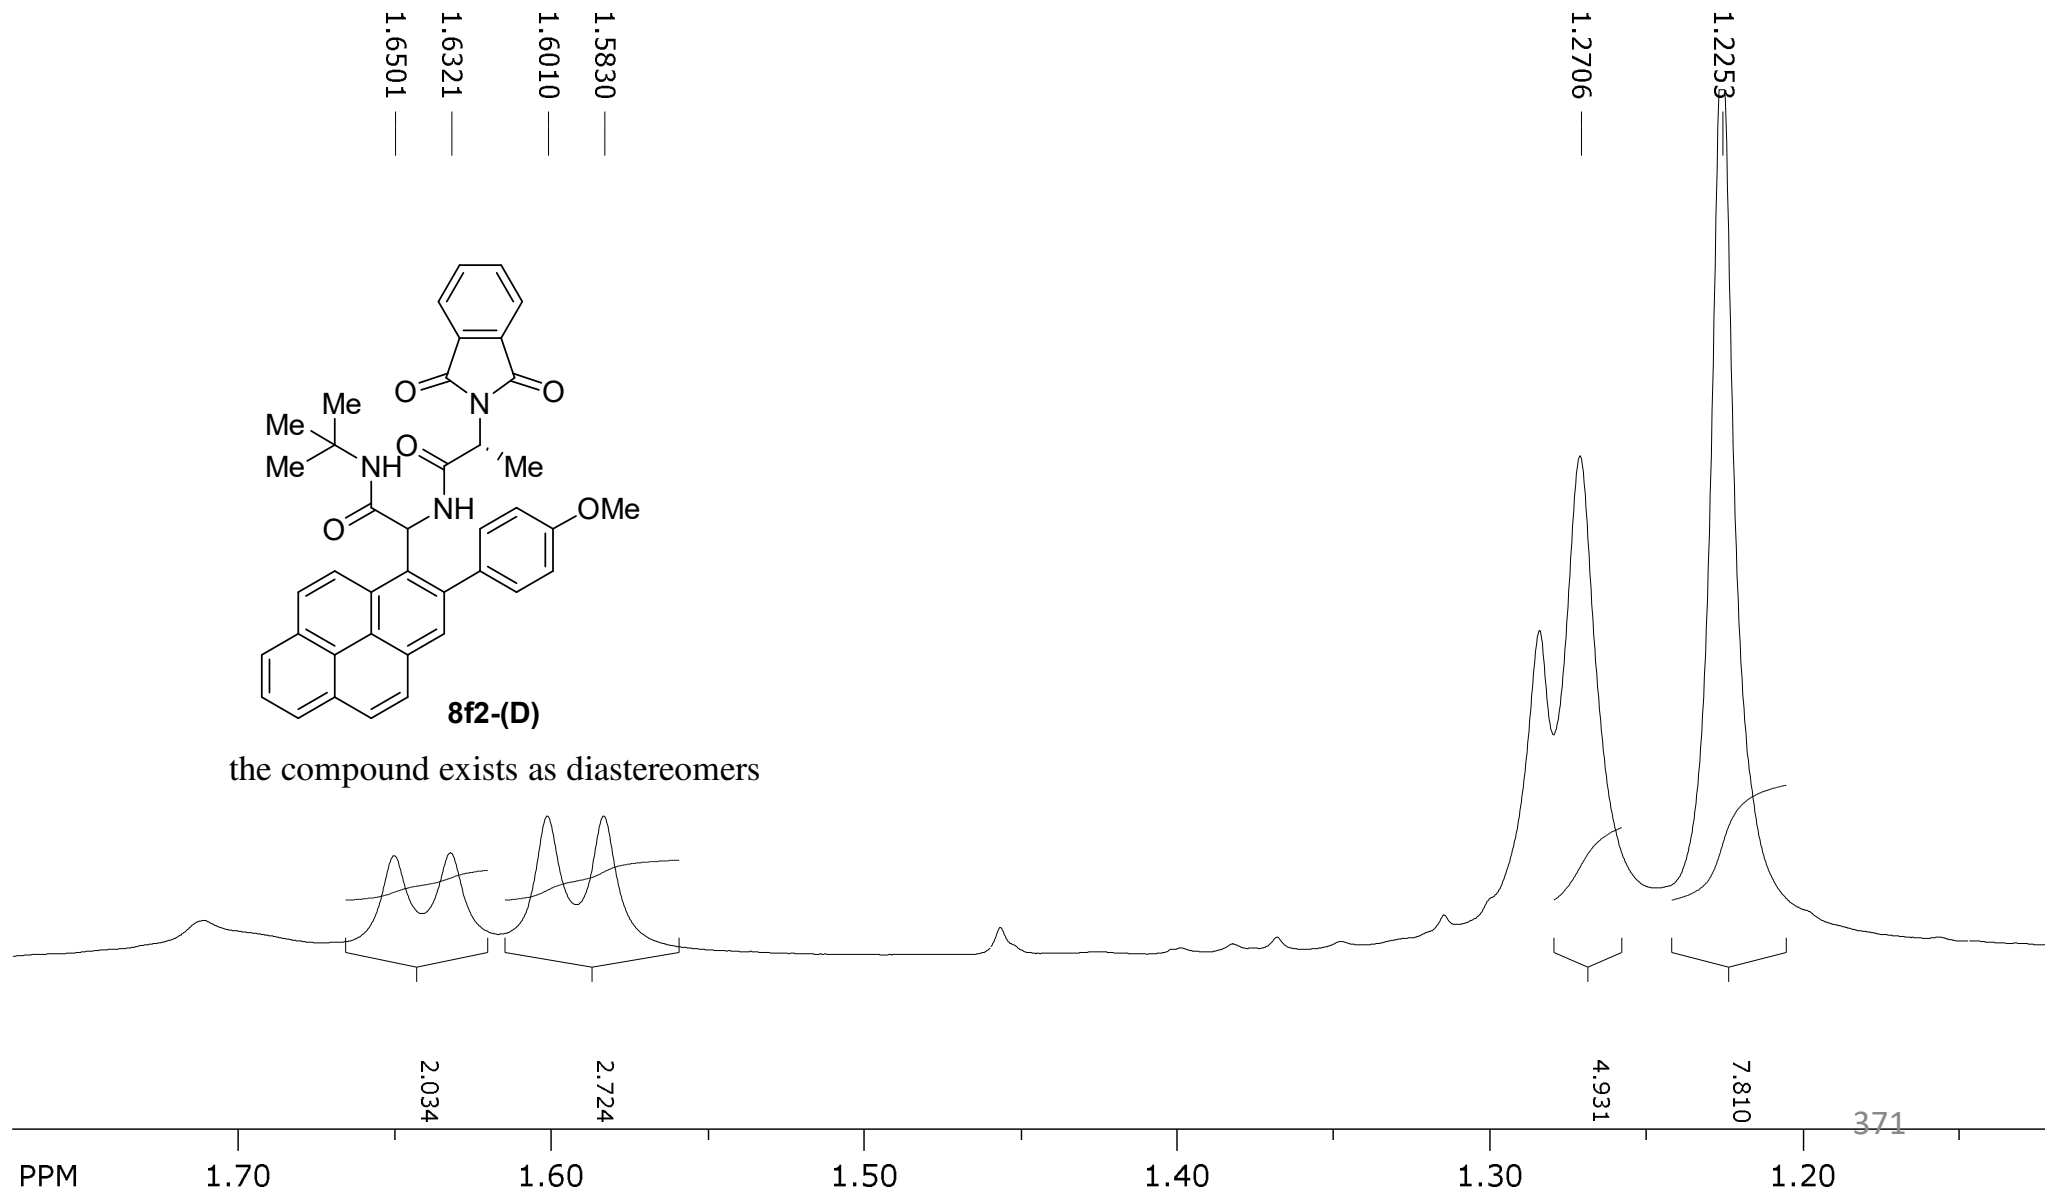

SpinWorks 4: AD 2083  
C13CPD256 CDCl3 /opt/topspin3.5pl2/nmrdata nmrsu 42

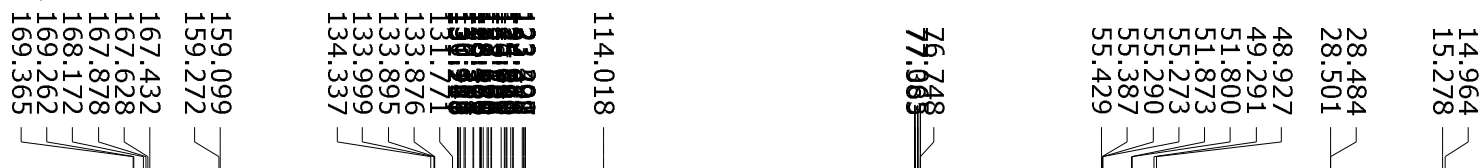

the compound exists as diastereomers

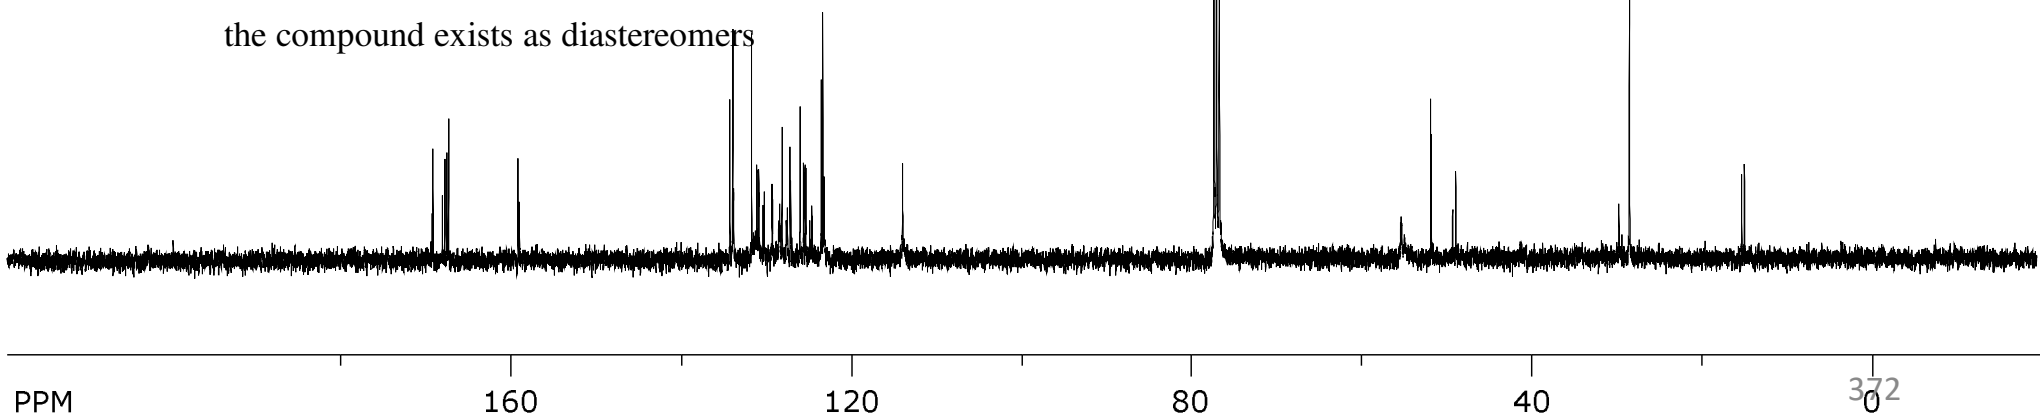

SpinWorks 4: AD 2083  
C13CPD256 CDCl3 /opt/topspin3.5pl2/nmrdata nmrsu 42

169.262  
169.365  
167.432  
167.628  
167.878  
168.172

159.099  
159.272



the compound exists as diastereomers

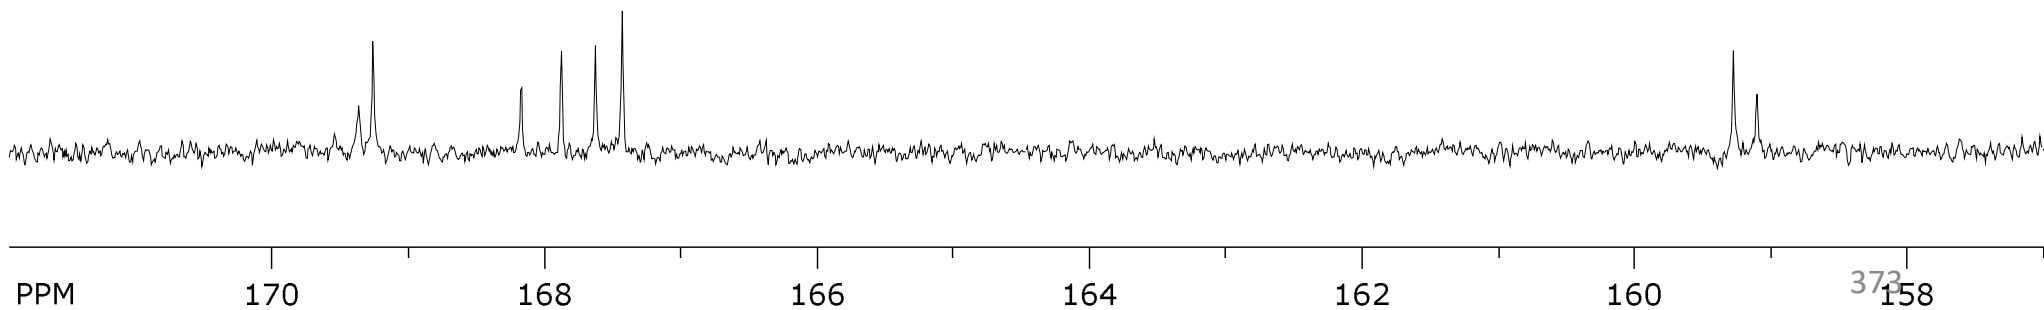

SpinWorks 4: AD 2083  
C13CPD256 CDCl3 /opt/topspin3.5pl2/nmrdata nmrsu 42

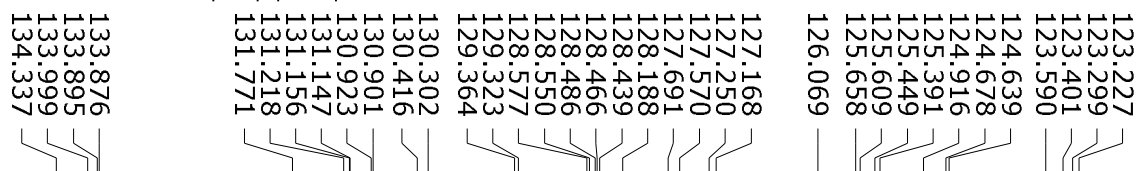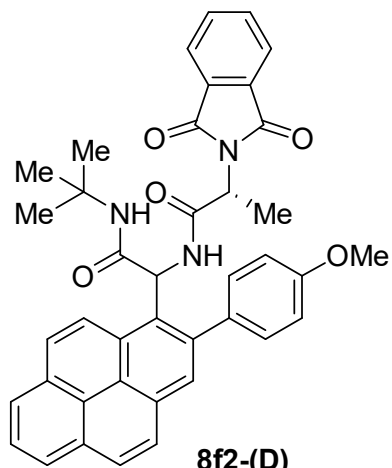

the compound exists as diastereomers

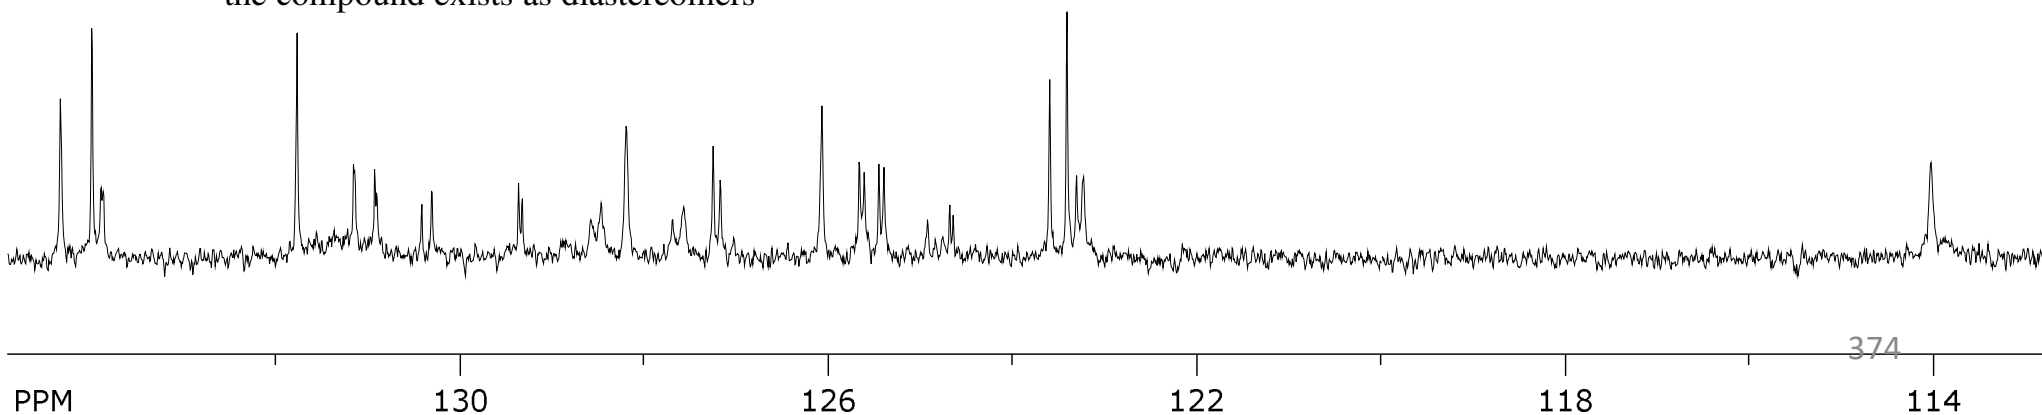

SpinWorks 4: AD 2083  
C13CPD256 CDCl3 /opt/topspin3.5pl2/nmrdata nmrsu 42

48.927  
49.291  
51.800  
51.873  
55.273  
55.290  
55.387  
55.429

28.484  
28.501

14.964  
15.278



the compound exists as diastereomers

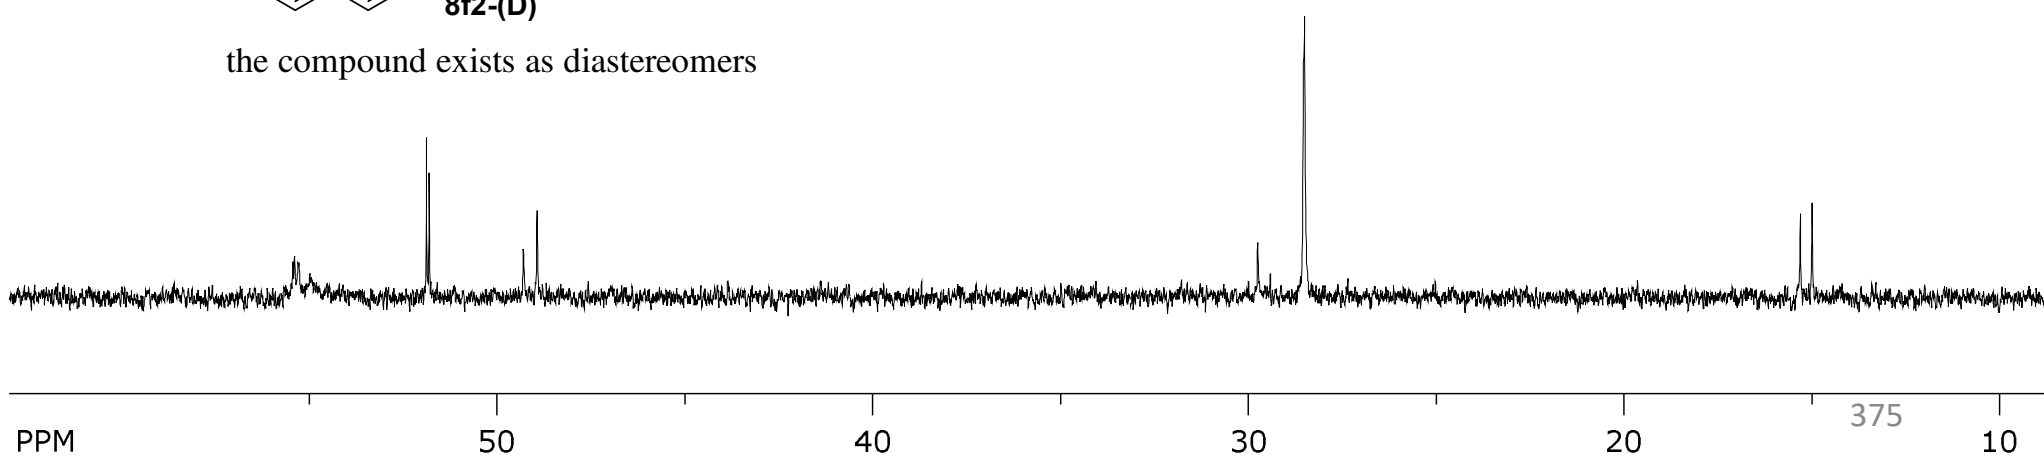

SpinWorks 4: AD-2180  
PROTON CDCl3 /opt/topspin3.5pl2/nmrdata nmrsu 30

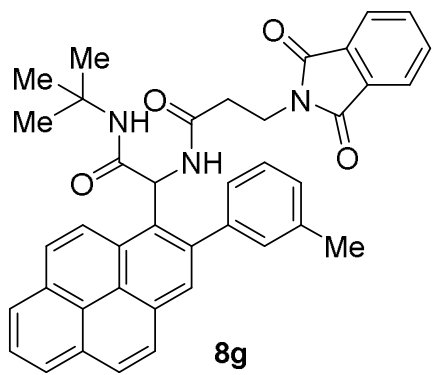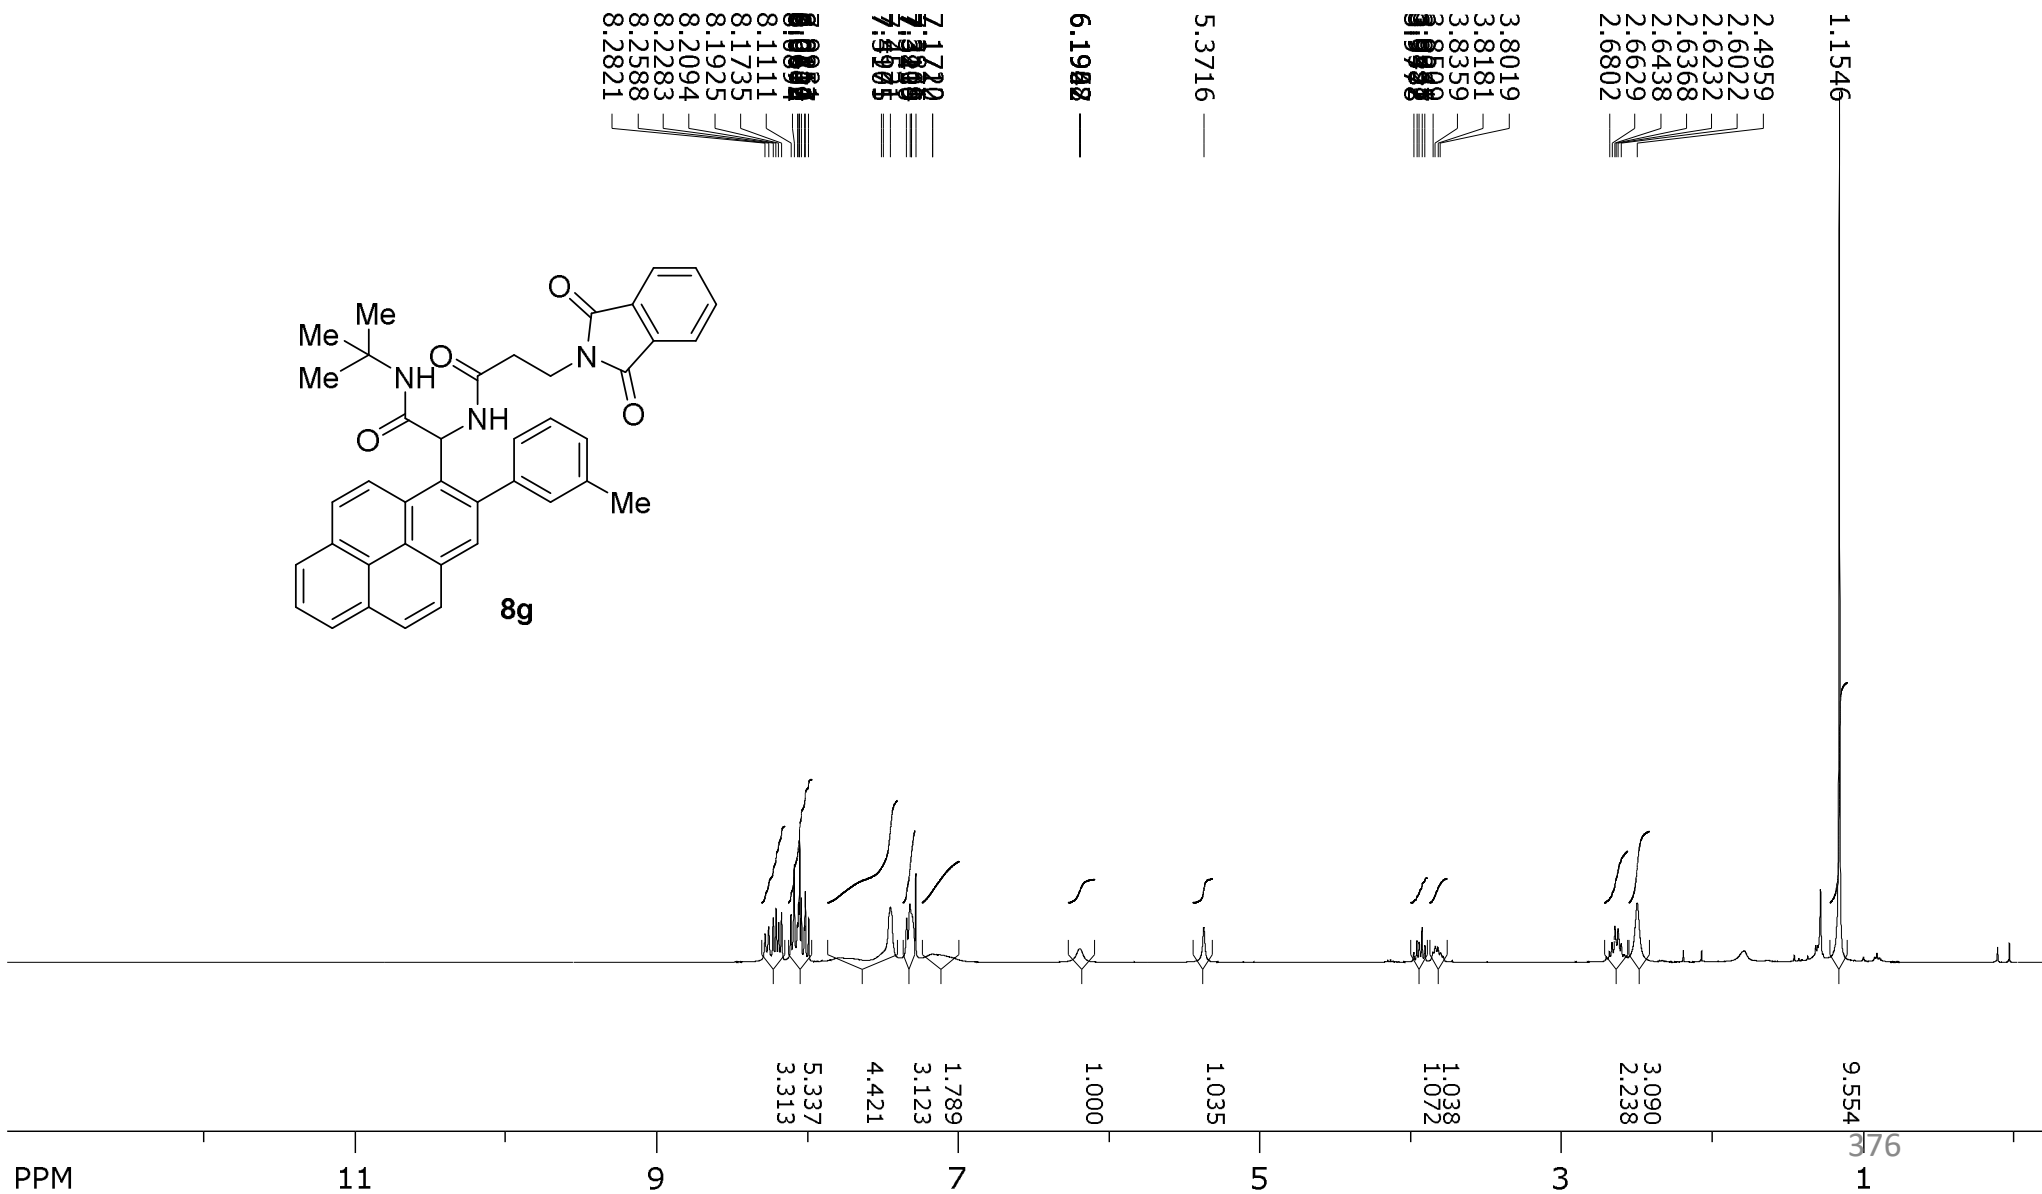



SpinWorks 4: AD-2180  
PROTON CDCl3 /opt/topspin3.5pl2/nmrdata nmrsu 30

7.9931  
8.0154  
8.0217  
8.0412  
8.0532  
8.0600  
8.0679  
8.0894  
8.1111  
8.1111  
8.1735  
8.1925  
8.2094  
8.2283  
8.2588  
8.2821

7.4521  
7.4971  
7.5105

7.2831  
7.3109  
7.3114  
7.3215  
7.3430

7.1710  
7.1722

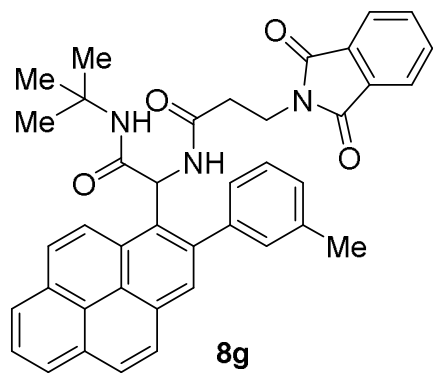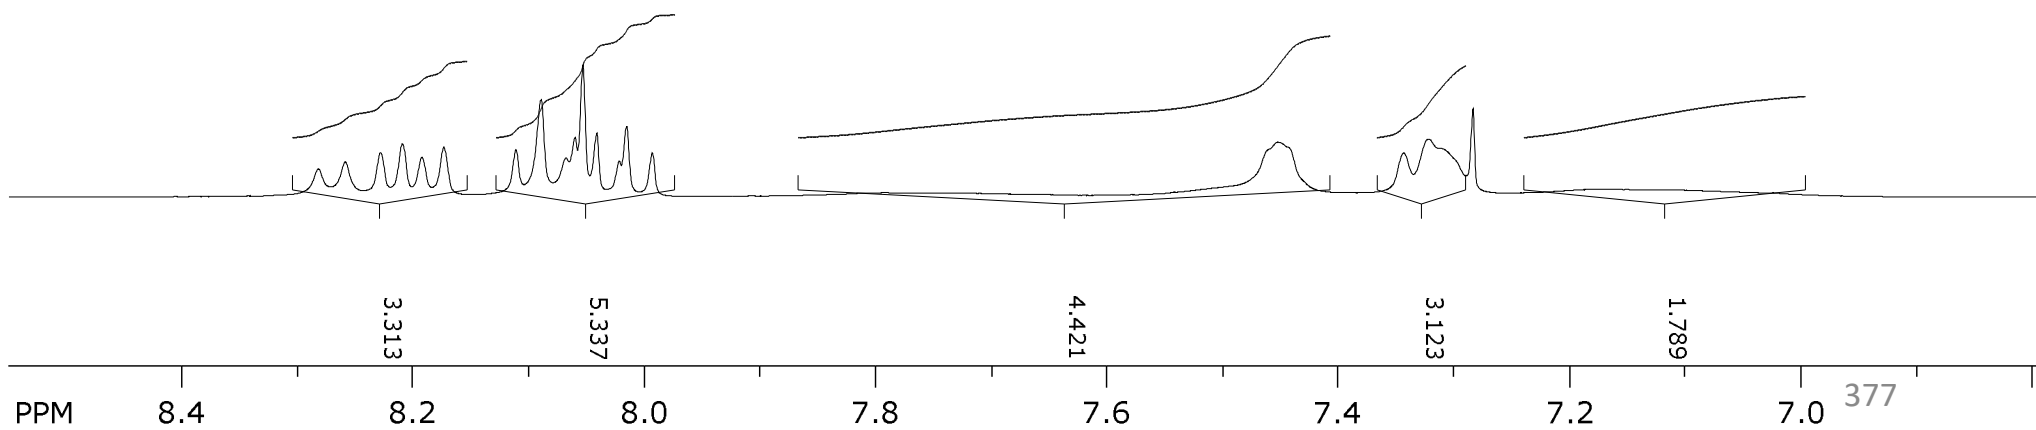

SpinWorks 4: AD-2180  
PROTON CDCl3 /opt/topspin3.5pl2/nmrdata nmrsu 30

3.8019  
3.8181  
3.8359  
3.8509  
3.9041  
3.9235  
3.9427  
3.9582  
3.9778

5.3716

6.1908  
~~6.1902~~  
6.1982

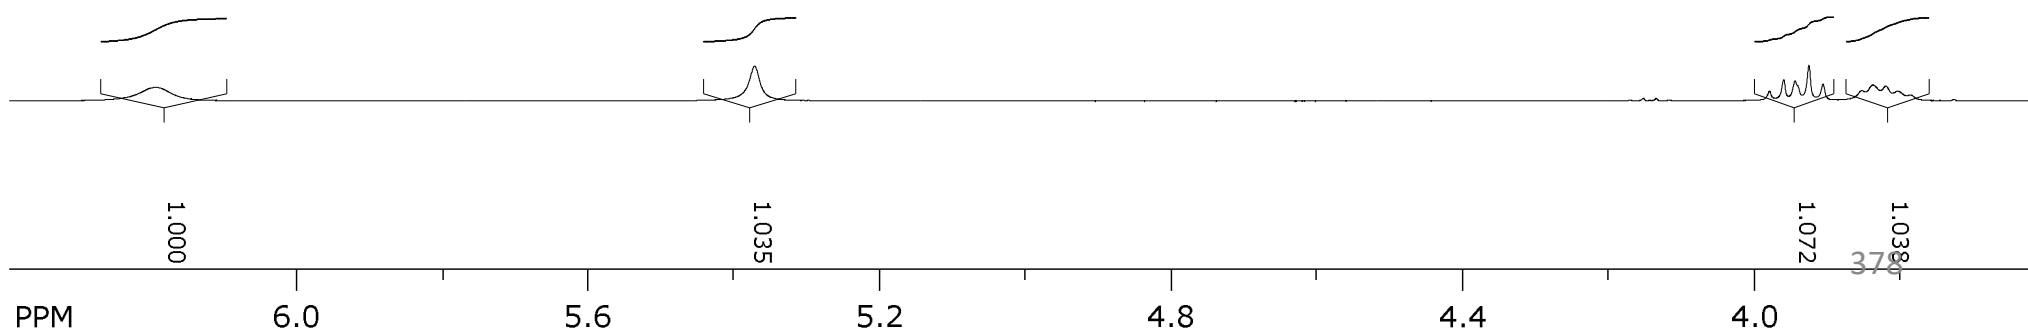

SpinWorks 4: AD-2180  
PROTON CDCl3 /opt/topspin3.5pl2/nmrdata nmrsu 30

2.4959  
2.6022  
2.6232  
2.6368  
2.6438  
2.6629  
2.6802

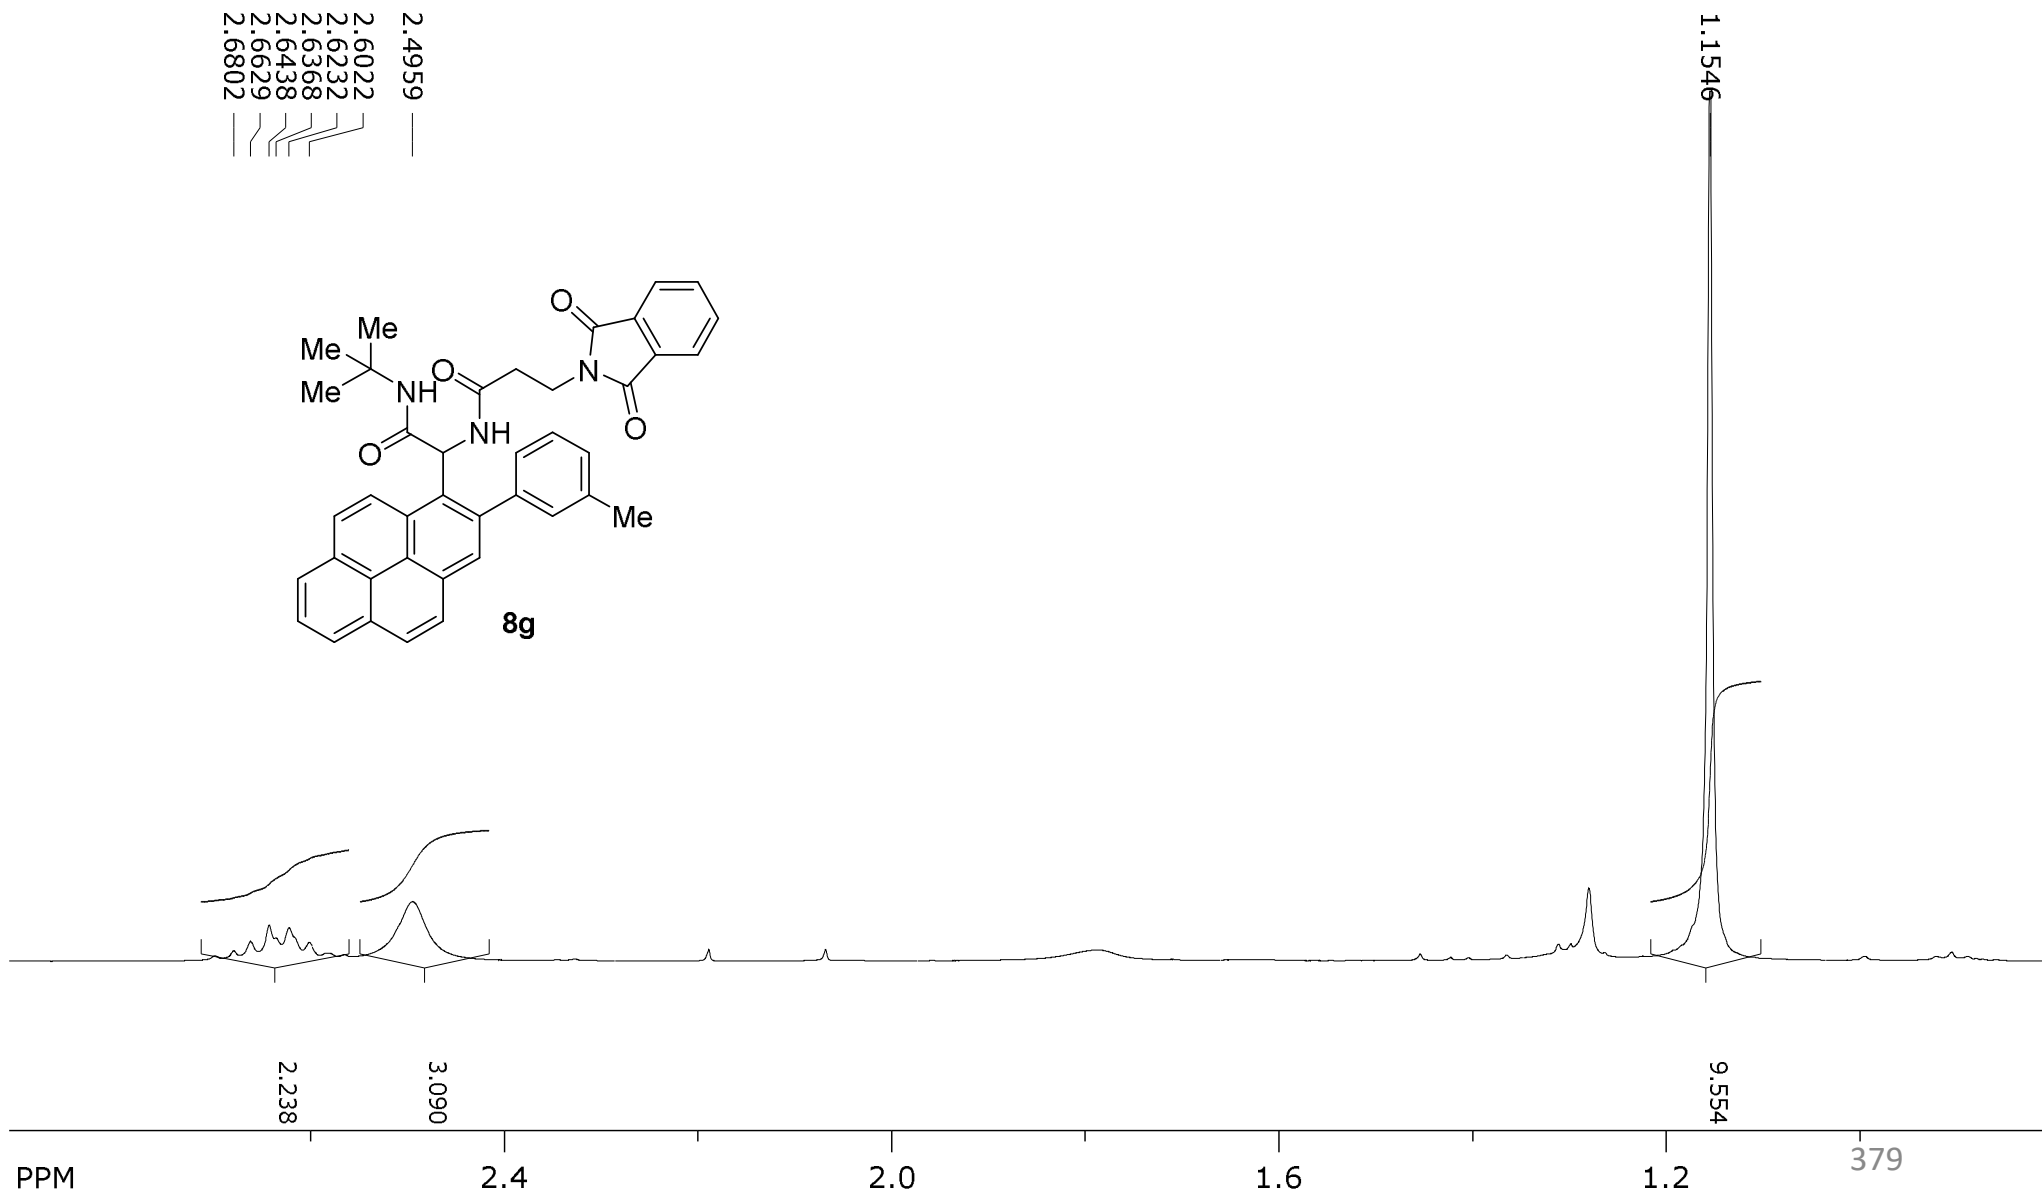

SpinWorks 4: AD-2180  
C13CPD256 CDCl3 /opt/topspin3.5pl2/nmrdata nmrsu 30



167.827  
168.861  
169.415  
122.698  
123.313  
124.642  
124.821  
125.594  
126.156  
129.094  
129.094  
129.183  
130.349  
130.775  
131.138  
131.465  
133.355  
141.219  
141.530

76.754  
77.072  
77.389

51.725  
54.757

34.426  
34.762

21.593

PPM

160

120

80

40

380

0

SpinWorks 4: AD-2180  
C13CPD256 CDCl3 /opt/topspin3.5pl2/nmrdata nmrsu 30

141.219  
141.530

133.355  
131.465  
131.138  
130.775  
130.349  
129.183  
128.632  
128.601  
128.211  
128.211  
127.224  
127.057  
126.156  
125.646  
125.594  
124.821  
124.642  
123.313  
122.698



8g

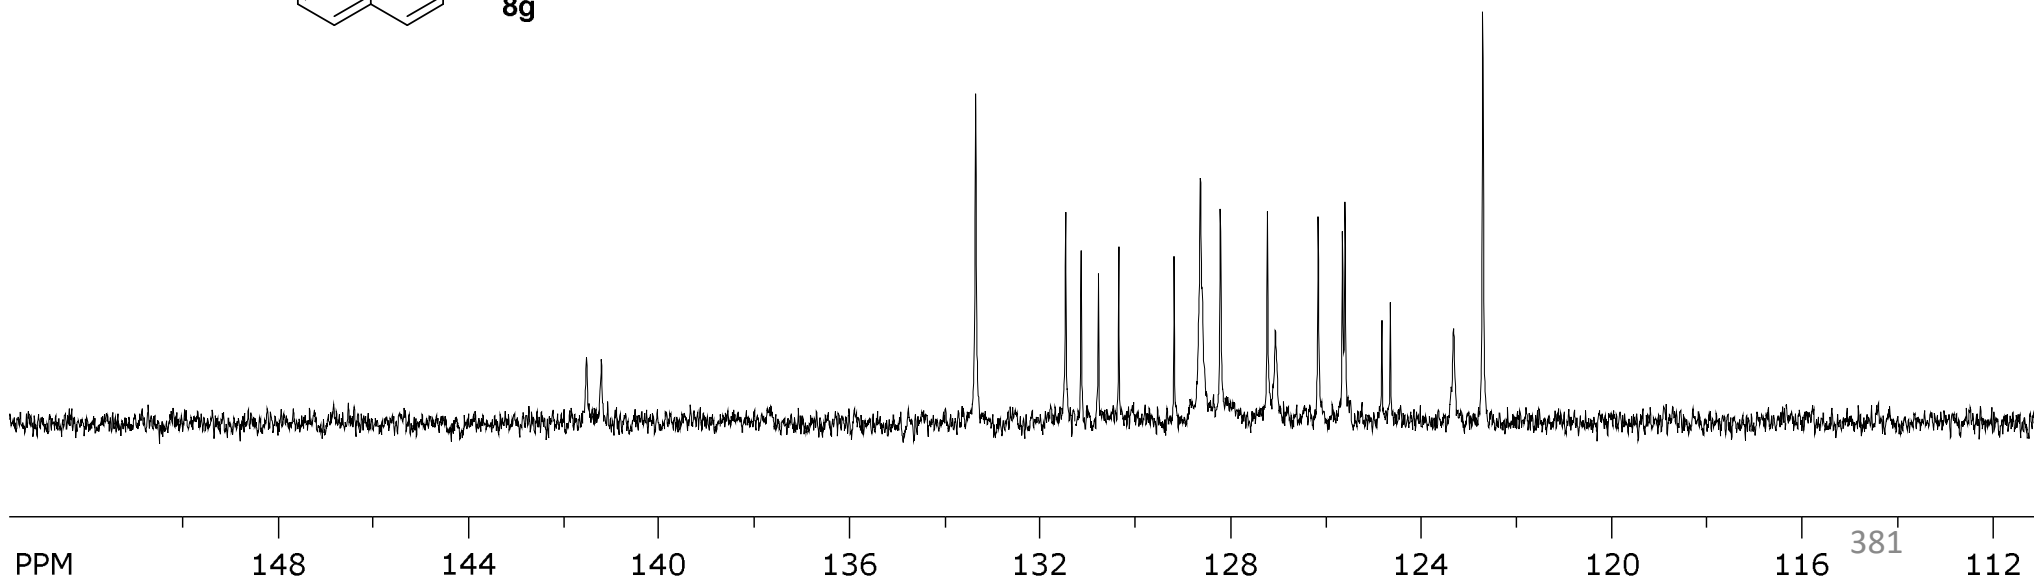



SpinWorks 4: AD 2192 RE  
PROTON CDCl3 /opt/topspin3.5pl2/nmrdata nmrsu 54

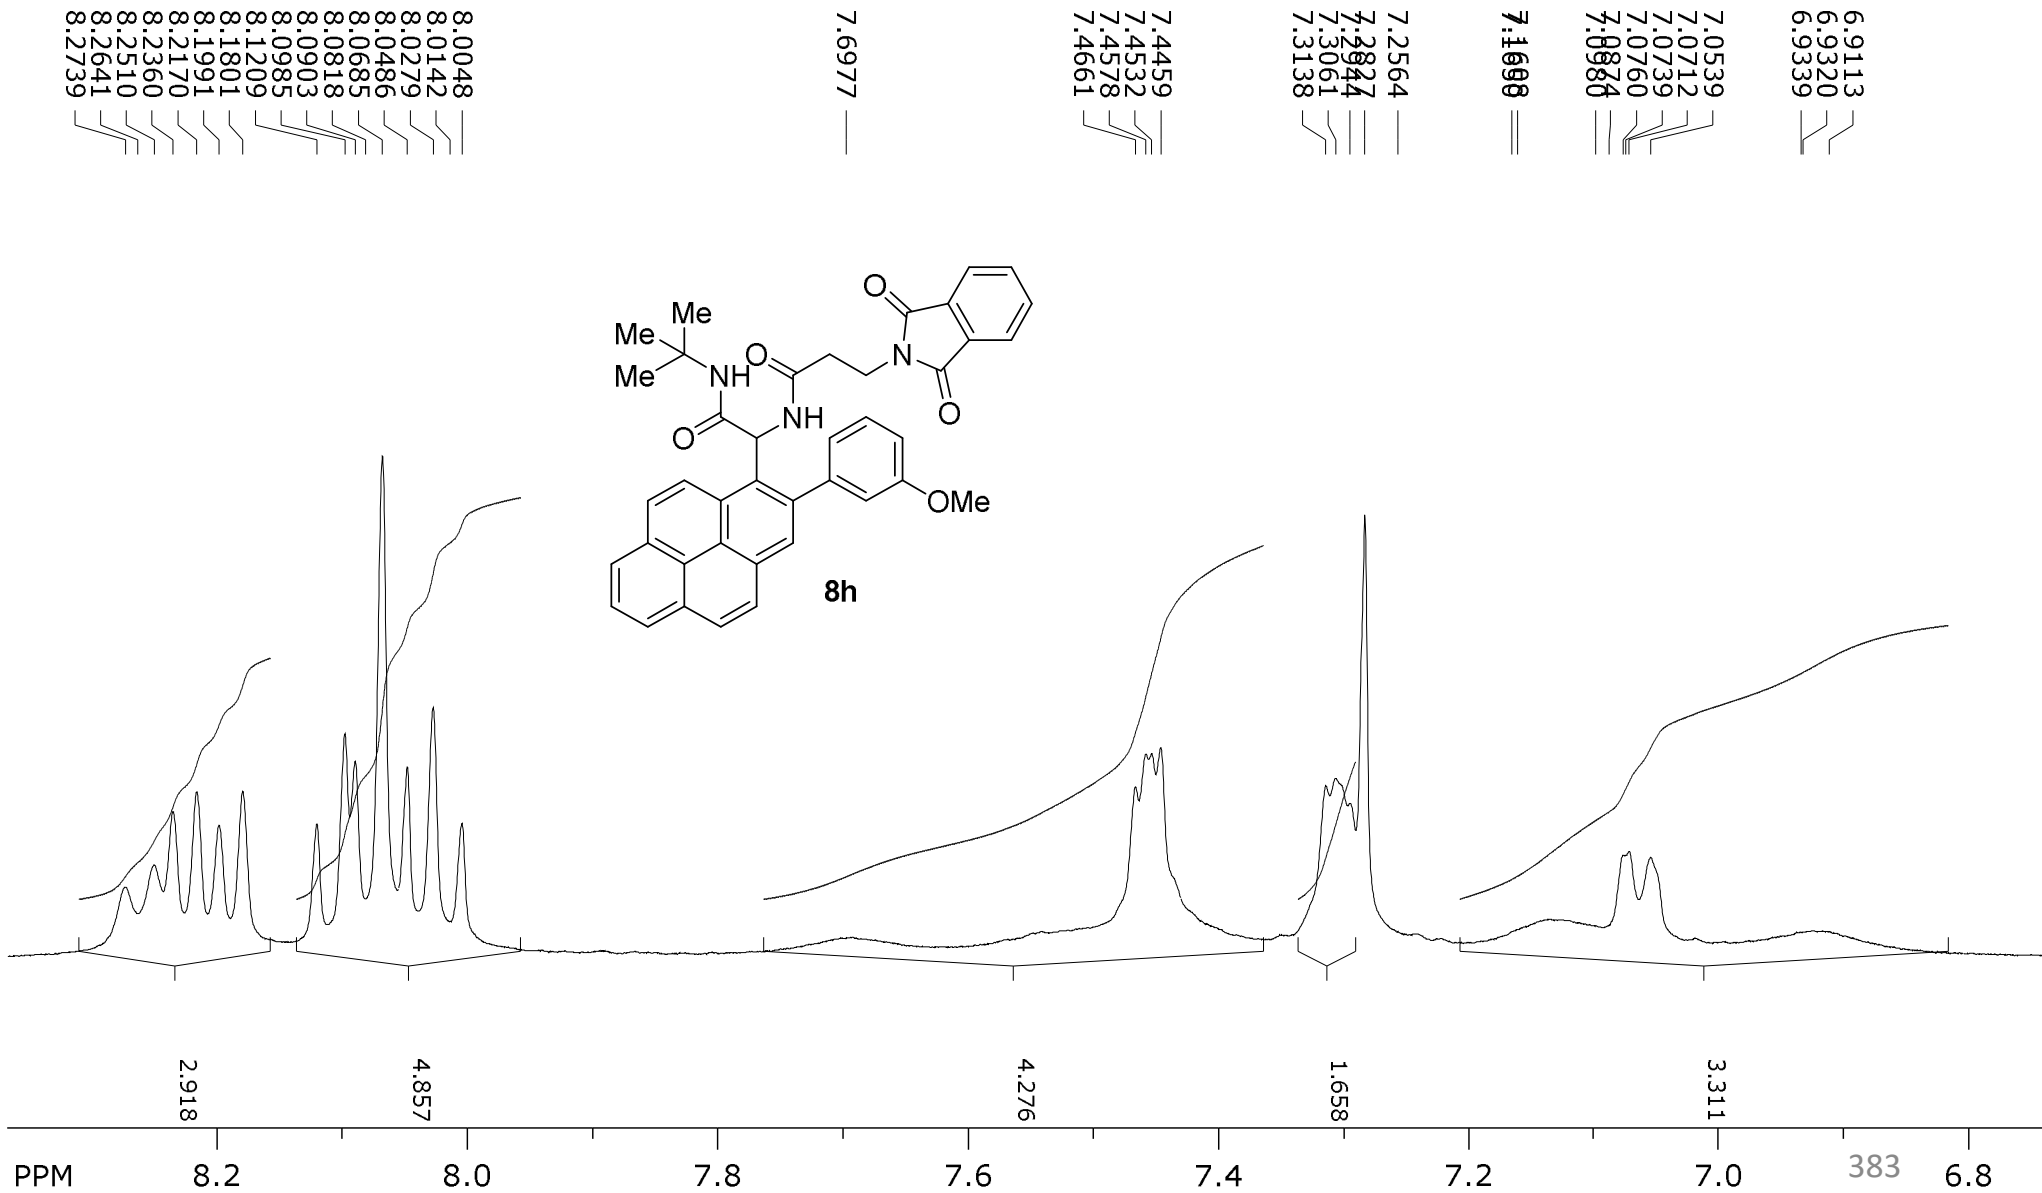

SpinWorks 4: AD 2192 RE  
PROTON CDCl3 /opt/topspin3.5pl2/nmrdata nmrsu 54

6.1961  
6.2106

5.3235  
5.3289  
5.3458  
5.3694  
5.3719

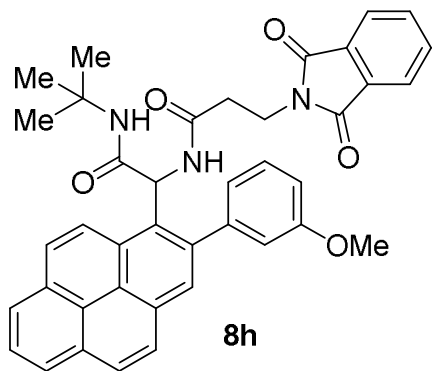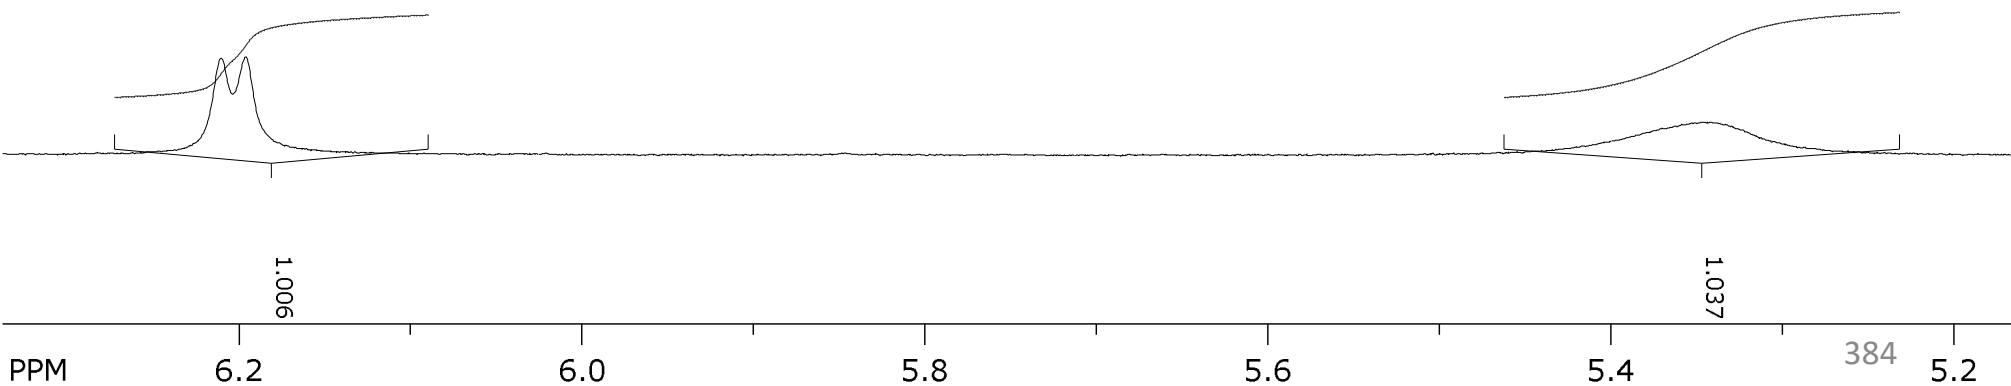



SpinWorks 4: AD 2192 RE  
PROTON CDCl3 /opt/topspin3.5pl2/nmrdata nmrsu 54

3.7874  
3.7878  
3.8051  
3.8123  
3.8217  
3.8396  
3.8551  
3.8972  
3.9154  
3.9342  
3.9358

2.6057  
2.6254  
2.6361  
2.6545  
2.6739  
2.6919

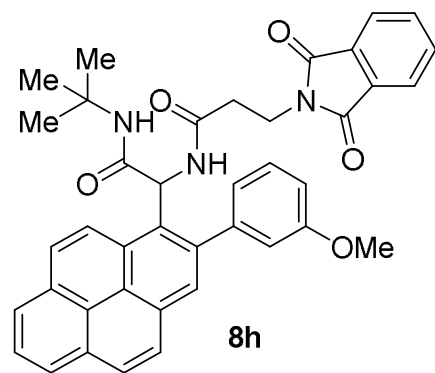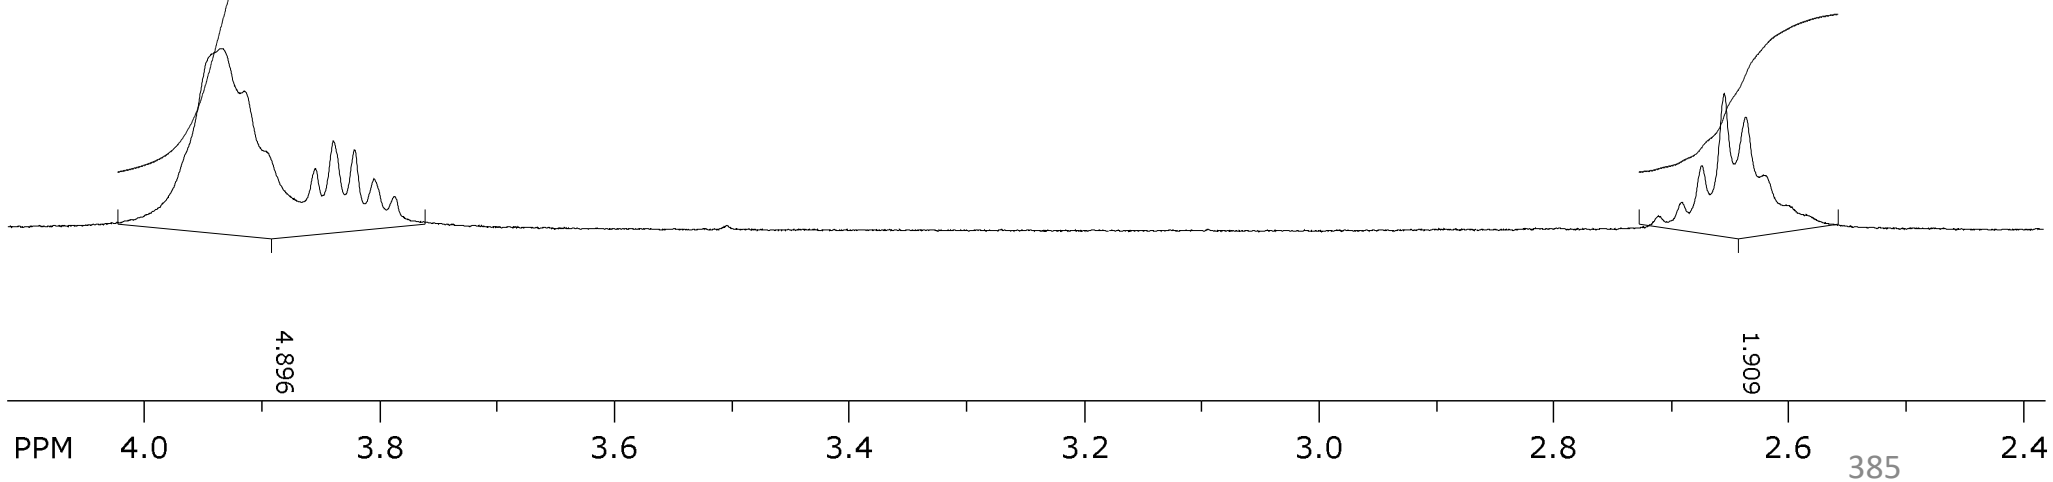

SpinWorks 4: AD-2192  
C13CPD256 CDCl3 /opt/topspin3.5pl2/nmrdata nmrsu 43

167.815  
168.867  
169.341

142.959  
140.925  
133.341  
131.471  
131.157  
130.792  
130.362  
129.217  
129.000  
128.888  
125.648  
125.607  
124.924  
124.646  
123.340  
122.685  
115.581

77.356  
77.038  
76.721

55.460  
54.759  
51.752

34.769  
34.446  
28.391

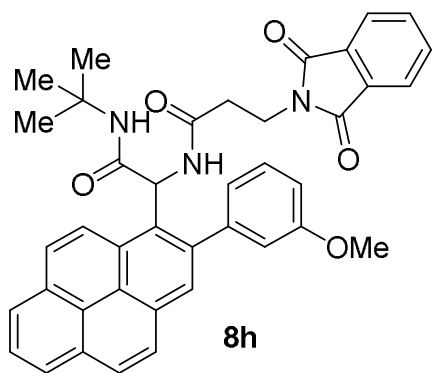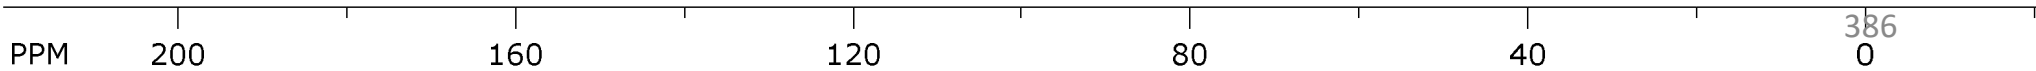

SpinWorks 4: AD-2192  
C13CPD256 CDCl3 /opt/topspin3.5pl2/nmrdata nmrsu 43

167.815  
168.867  
169.341

140.925  
142.959

122.685  
123.340  
124.646  
124.924  
125.607  
125.648  
126.178  
126.864  
127.210  
128.233  
128.570  
128.607  
129.217  
130.362  
130.792  
131.157  
131.471  
133.341

115.581

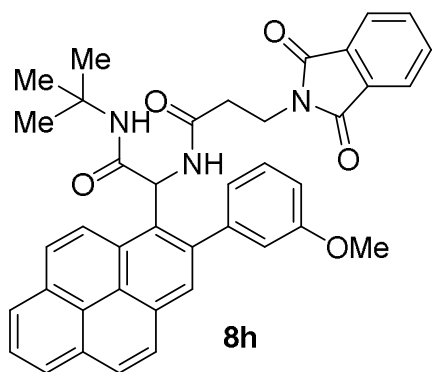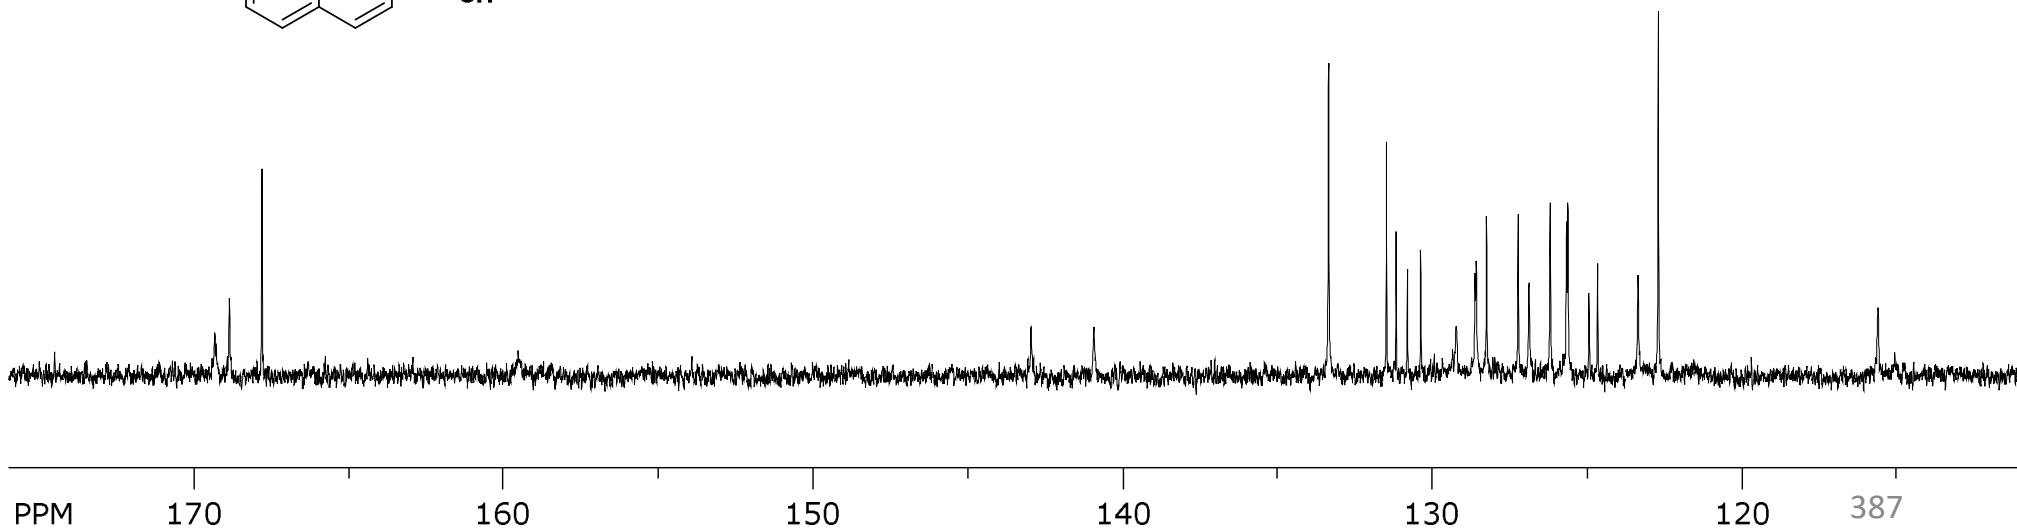

SpinWorks 4: AD-2192  
C13CPD256 CDCl3 /opt/topspin3.5pl2/nmrdata nmrsu 43

55.460 —  
54.759 —

51.752 —

34.446 —  
34.769 —

28.391 —

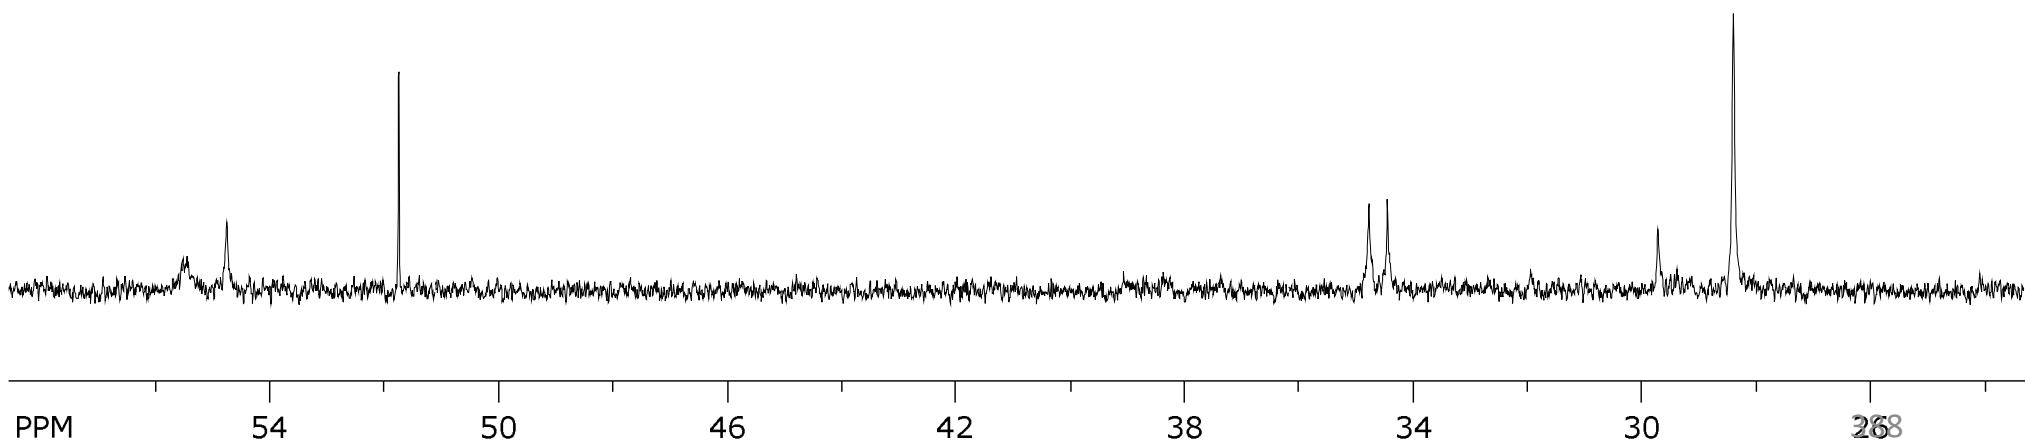

## The absorption spectra and $\lambda_{\max}$ of compounds 4a-d

(concentration = 0.02 g/100 mL in  $\text{CHCl}_3$ )

$\lambda_{\max}$  (absorption) (the absorption band appearing at the longest wavelength) of compounds

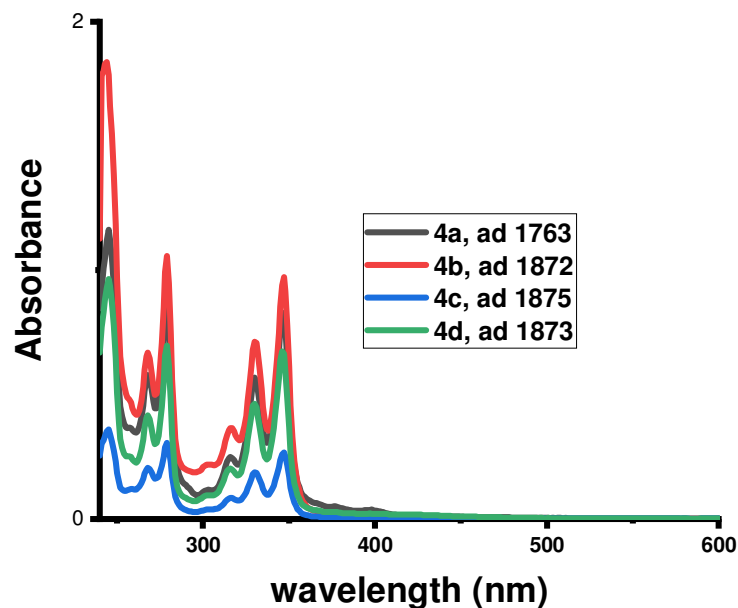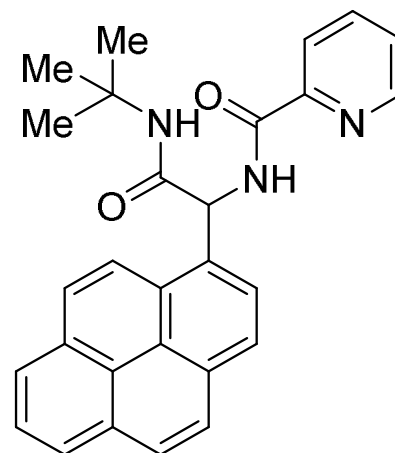

4a :  $\lambda_{\max} = 347$  nm

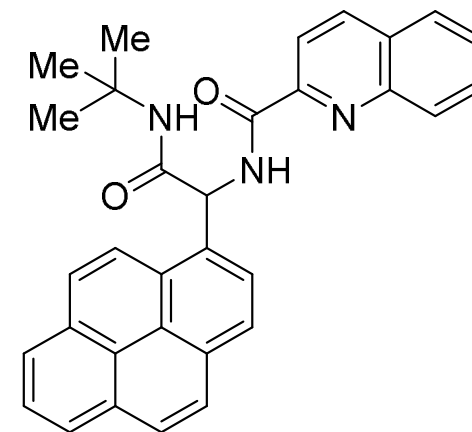

4b :  $\lambda_{\max} = 347$  nm

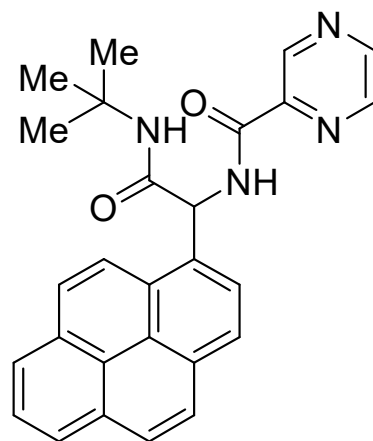

4c :  $\lambda_{\max} = 347$  nm

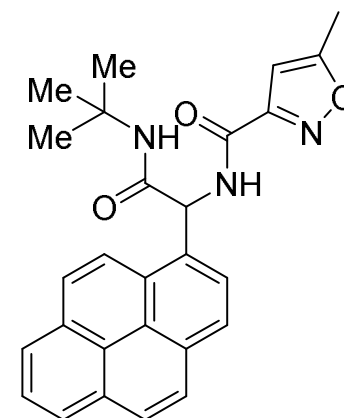

4d :  $\lambda_{\max} = 347$  nm

## The absorption spectra and $\lambda_{\max}$ of compounds 6a-j

(concentration = 0.02 g/100 mL in  $\text{CHCl}_3$ )

$\lambda_{\max}$  (absorption) (the absorption band appearing at the longest wavelength) of compounds

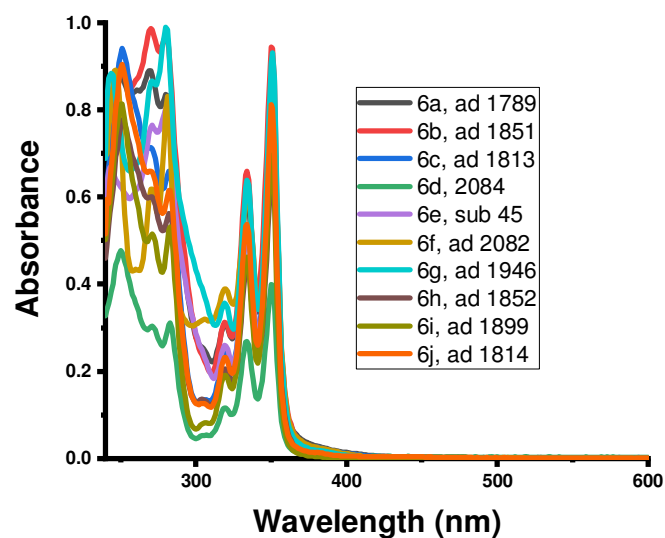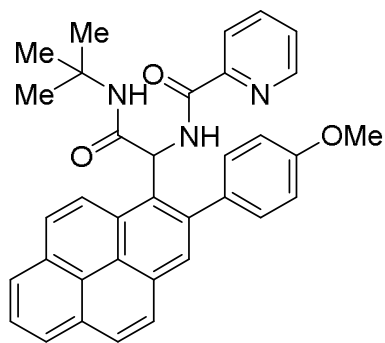

6a :  $\lambda_{\max}$  = 351 nm

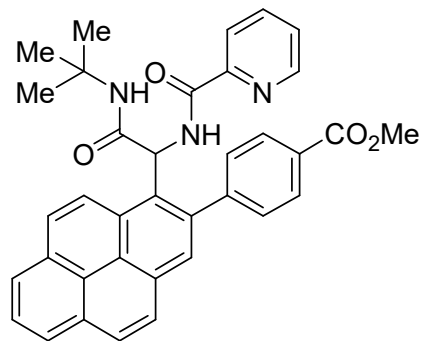

6b :  $\lambda_{\max}$  = 350 nm

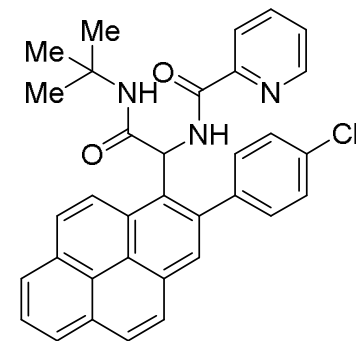

6c :  $\lambda_{\max}$  = 351 nm

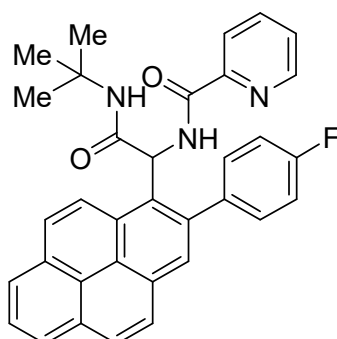

6d :  $\lambda_{\max}$  = 350 nm

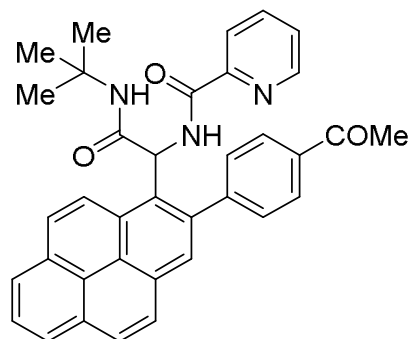

6e :  $\lambda_{\max}$  = 351 nm

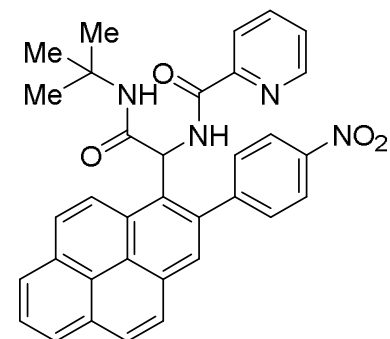

6f :  $\lambda_{\max}$  = 351 nm

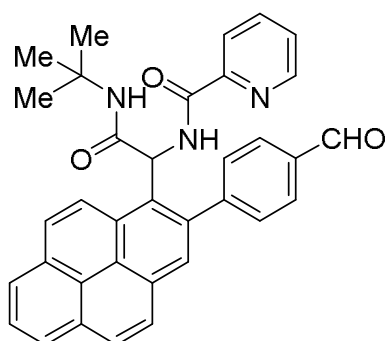

6g :  $\lambda_{\max}$  = 351 nm

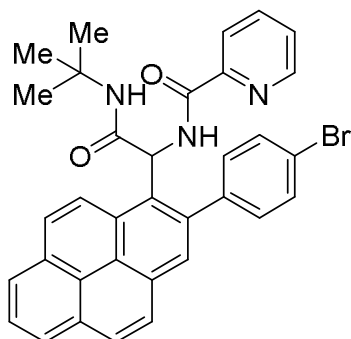

6h :  $\lambda_{\max}$  = 351 nm

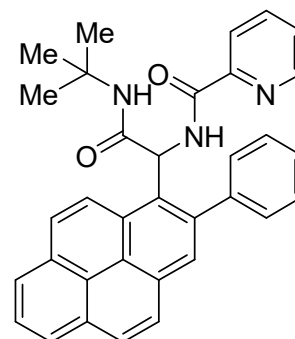

6i :  $\lambda_{\max}$  = 350 nm

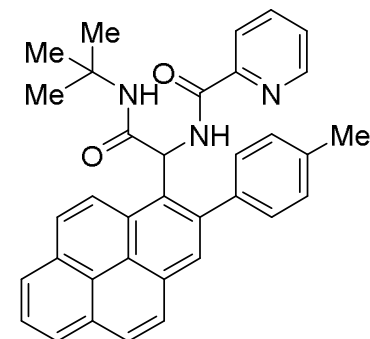

6j :  $\lambda_{\max}$  = 350 nm

**The absorption spectra and  $\lambda_{\max}$  of compounds 6k-t**

(concentration = 0.02 g/100 mL in  $\text{CHCl}_3$ )

$\lambda_{\max}$  (absorption) (the absorption band appearing at the longest wavelength) of compounds

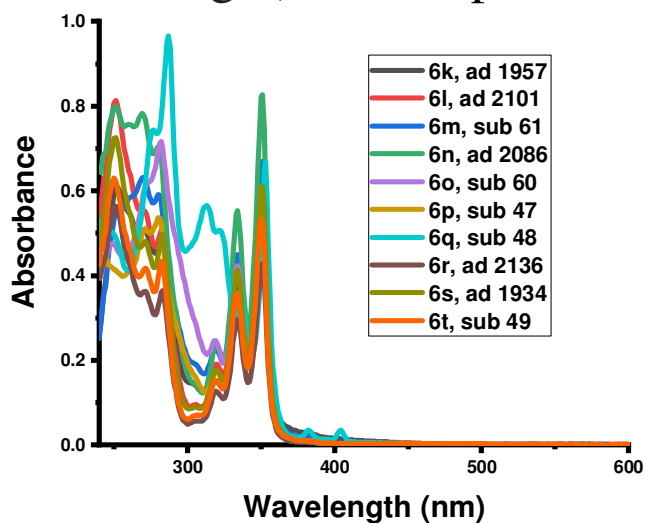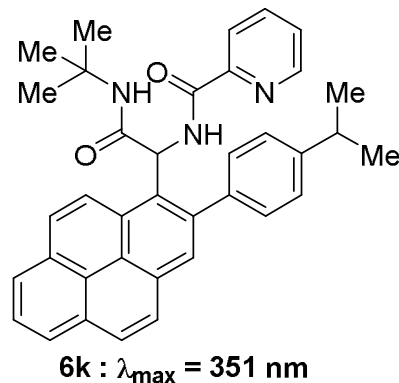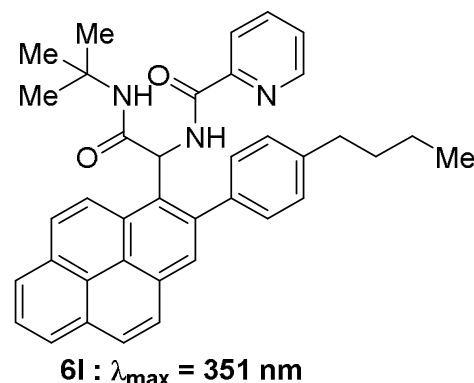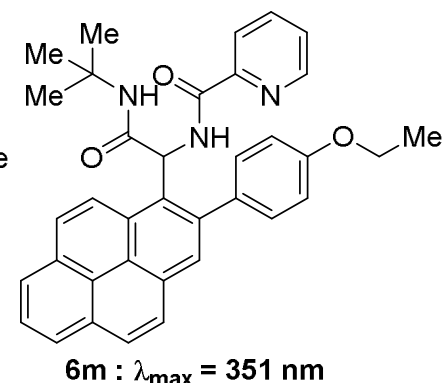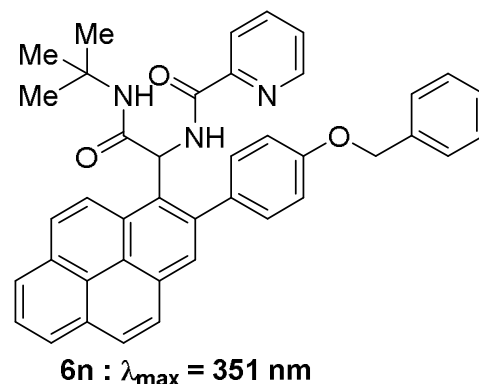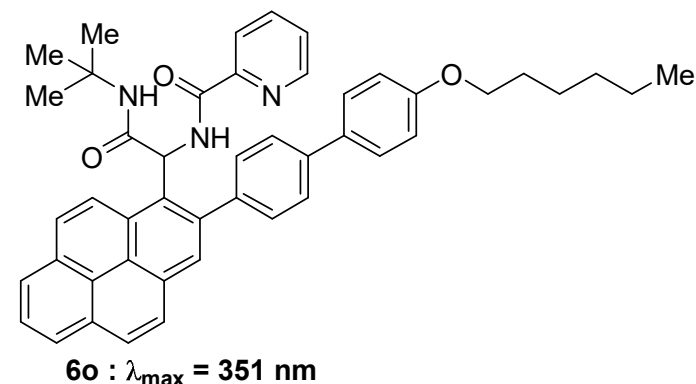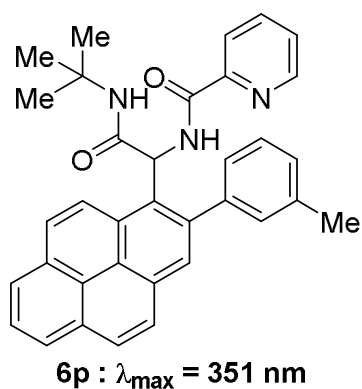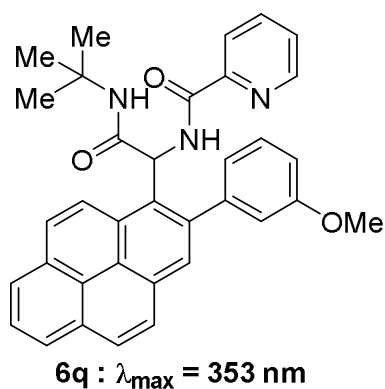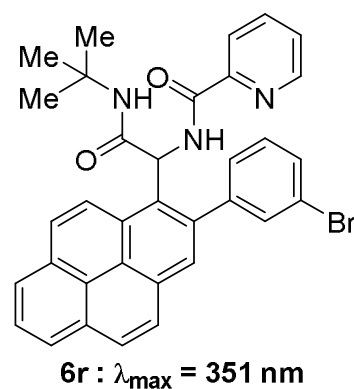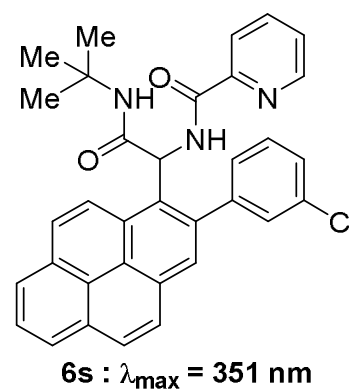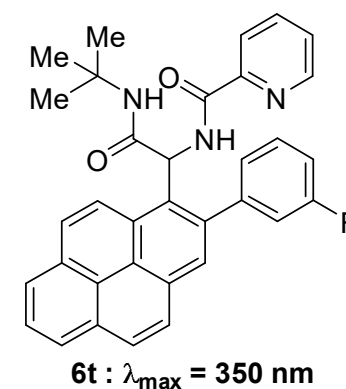

**The absorption spectra and  $\lambda_{\max}$  of compounds 6u-z, 6za, 6zb, 6zc**

(concentration = 0.02 g/100 mL in  $\text{CHCl}_3$ )

$\lambda_{\max}$  (absorption) (the absorption band appearing at the longest wavelength) of compounds

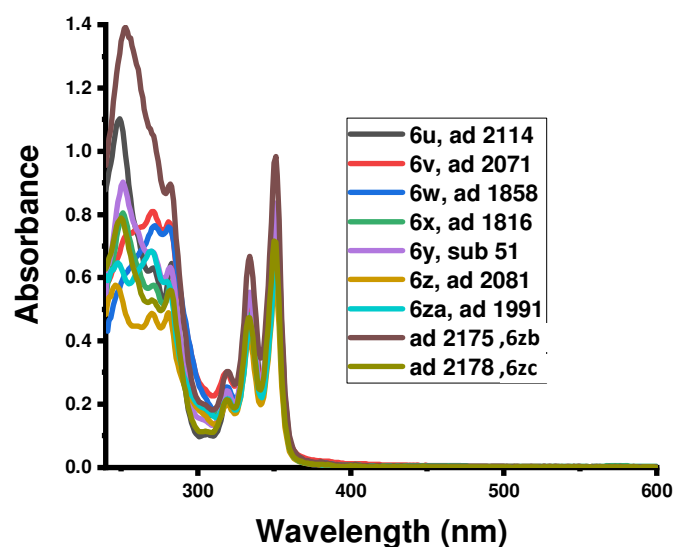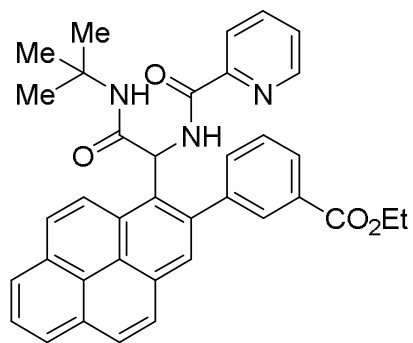

6u :  $\lambda_{\max} = 351 \text{ nm}$

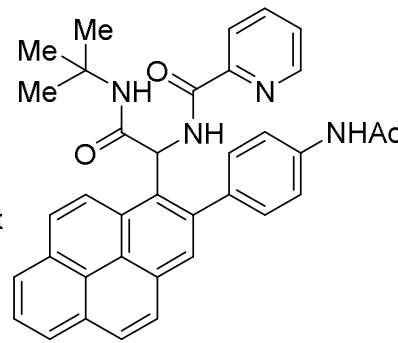

6v :  $\lambda_{\max} = 351 \text{ nm}$

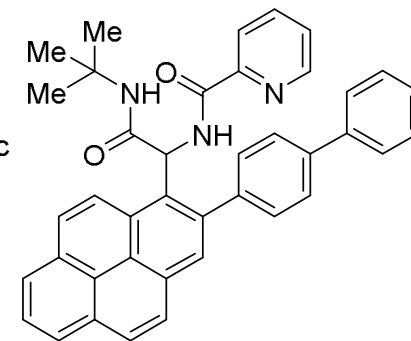

6w :  $\lambda_{\max} = 351 \text{ nm}$

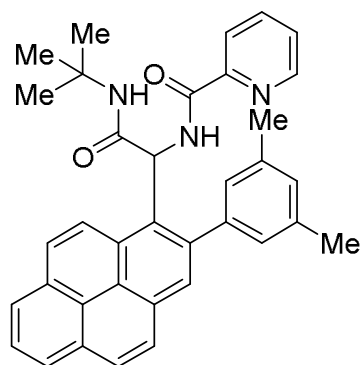

6x :  $\lambda_{\max} = 351 \text{ nm}$

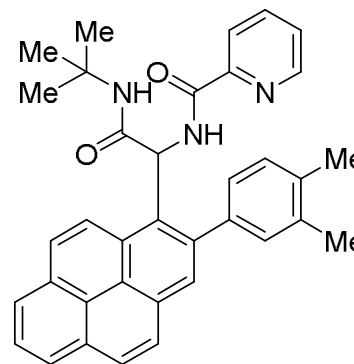

6y :  $\lambda_{\max} = 350 \text{ nm}$

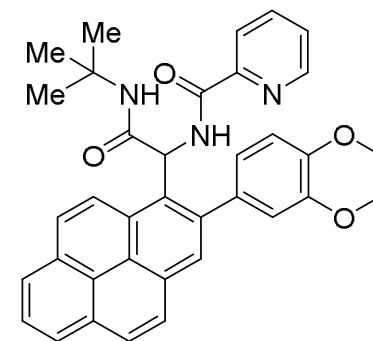

6z :  $\lambda_{\max} = 351 \text{ nm}$

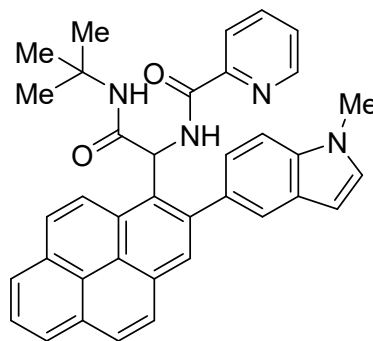

6za :  $\lambda_{\max} = 351 \text{ nm}$

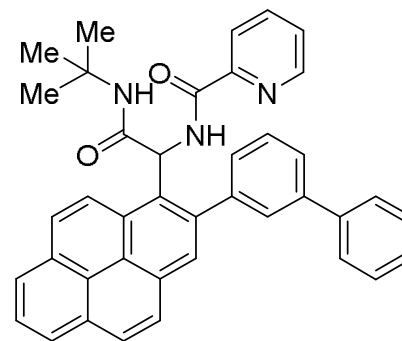

6zb :  $\lambda_{\max} = 351 \text{ nm}$

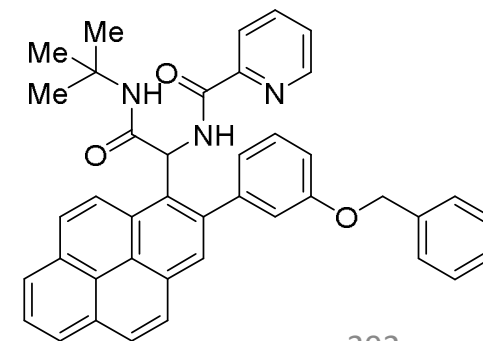

6zc :  $\lambda_{\max} = 350 \text{ nm}$ <sup>392</sup>



**The absorption spectra and  $\lambda_{\max}$  of compounds 6ze, 6zf, 6zg**

(concentration = 0.02 g/100 mL in  $\text{CHCl}_3$ )

$\lambda_{\max}$  (absorption) (the absorption band appearing at the longest wavelength) of compounds

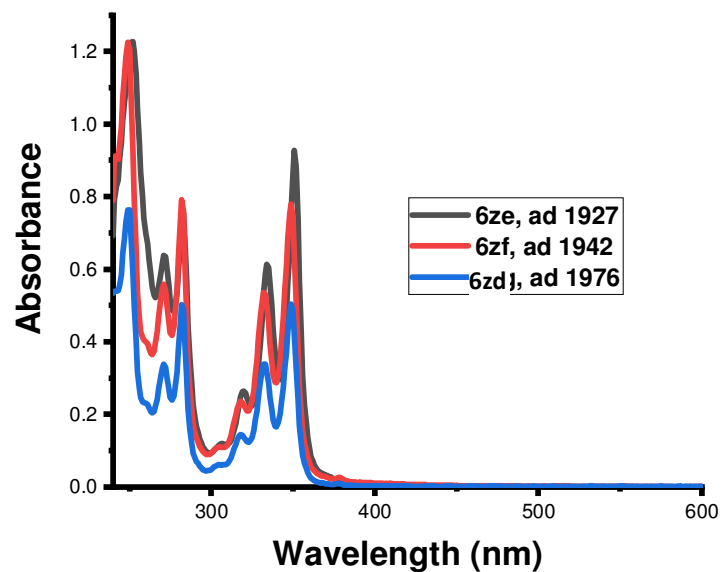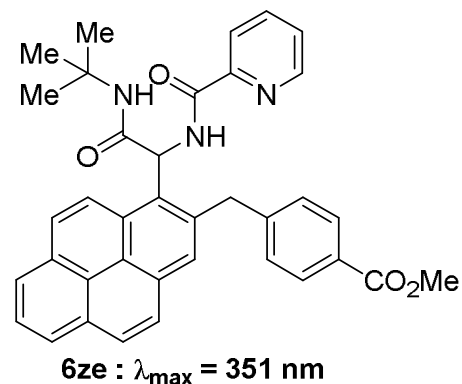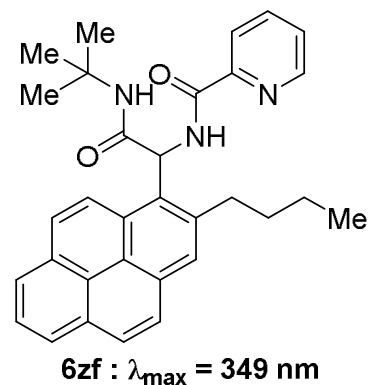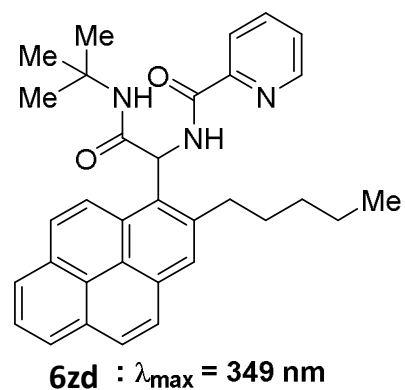

## The absorption spectra and $\lambda_{\max}$ of compounds 7a-h

(concentration = 0.02 g/100 mL in  $\text{CHCl}_3$ )

$\lambda_{\max}$  (absorption) (the absorption band appearing at the longest wavelength) of compounds

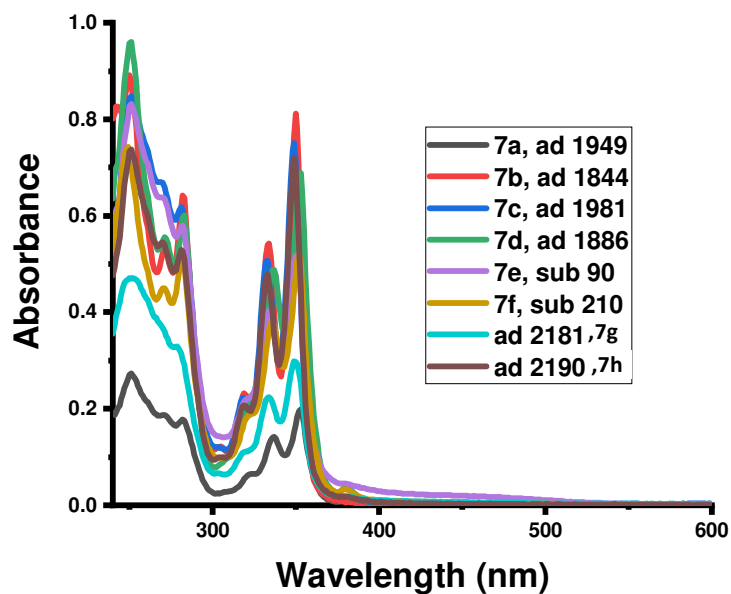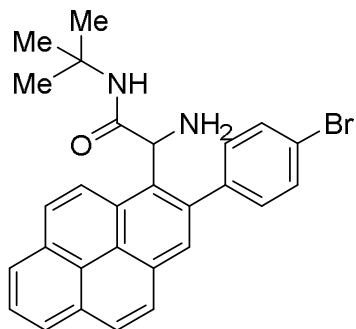

7a :  $\lambda_{\max} = 353$  nm

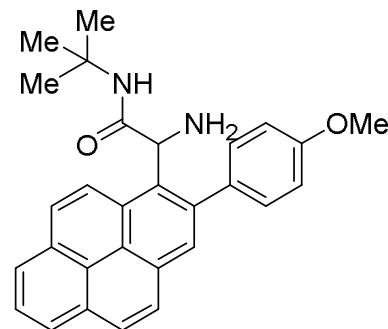

7b :  $\lambda_{\max} = 350$  nm

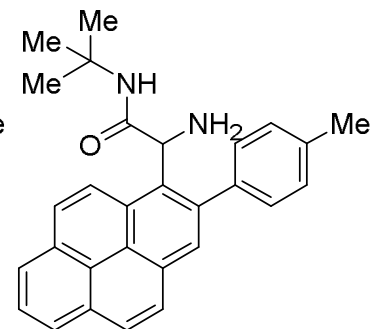

7c :  $\lambda_{\max} = 349$  nm

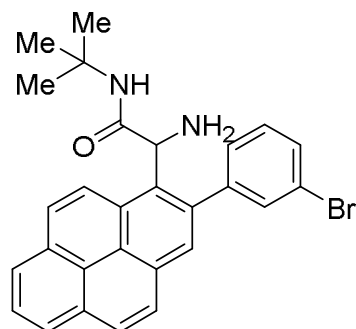

7d :  $\lambda_{\max} = 353$  nm

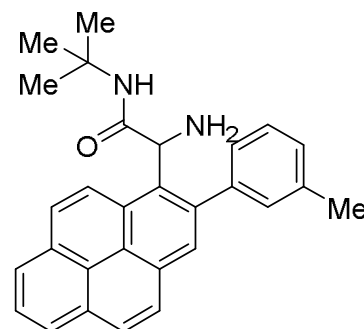

7e :  $\lambda_{\max} = 350$  nm

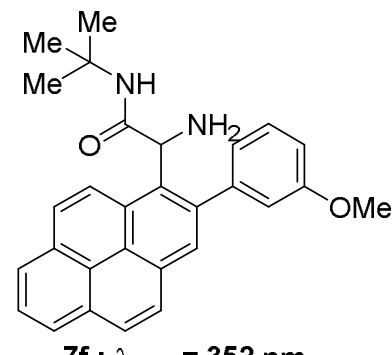

7f :  $\lambda_{\max} = 352$  nm

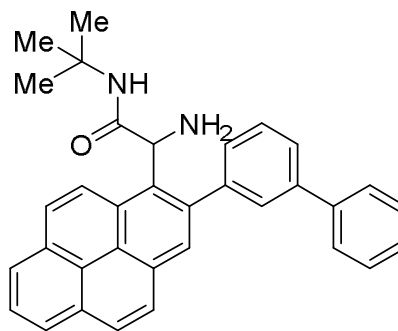

7g  $\lambda_{\max} = 349$  nm

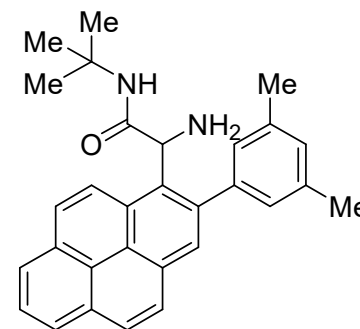

7h  $\lambda_{\max} = 349$  nm 394

**The absorption spectra and  $\lambda_{\max}$  of compounds 8a-h, 8f2-(D)**

(concentration = 0.02 g/100 mL in  $\text{CHCl}_3$ )

$\lambda_{\max}$  (absorption) (the absorption band appearing at the longest wavelength) of compounds

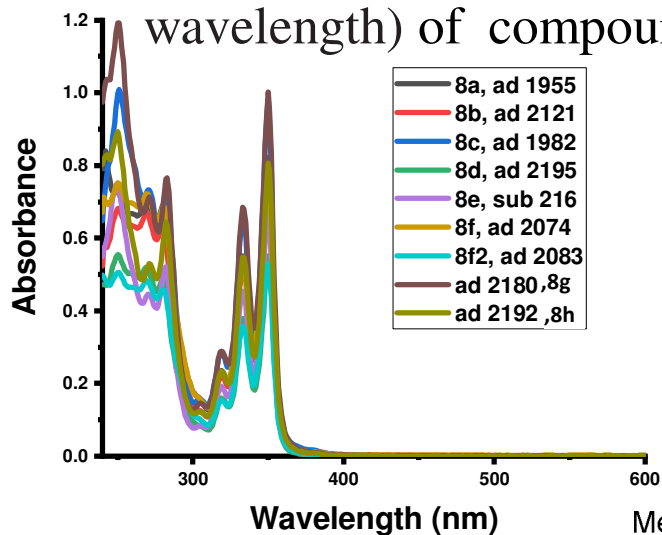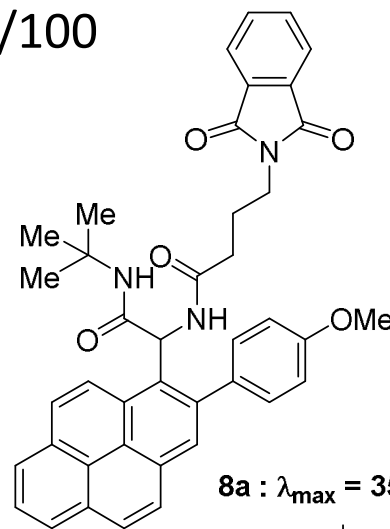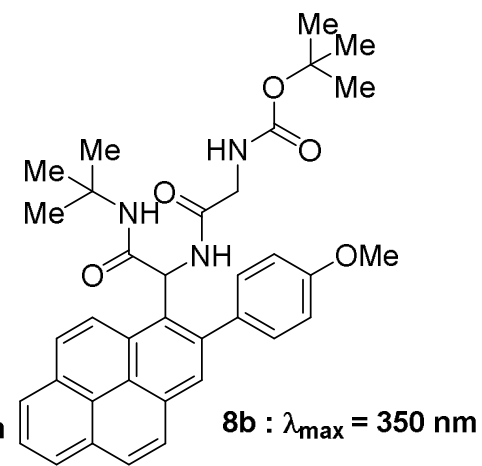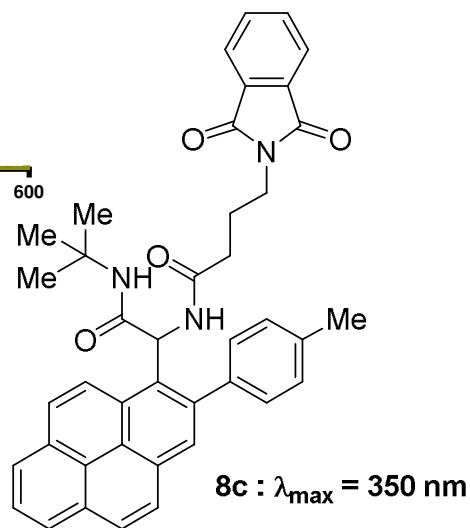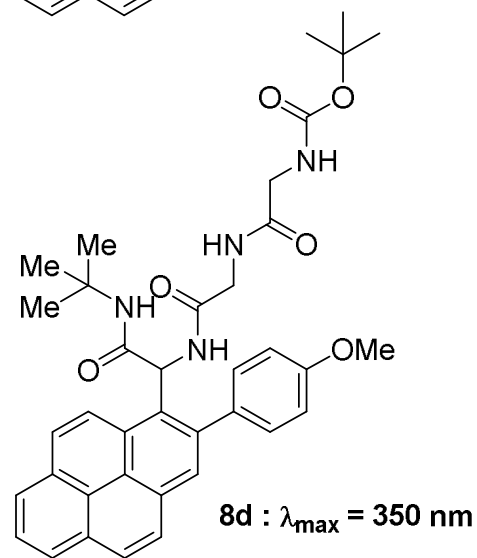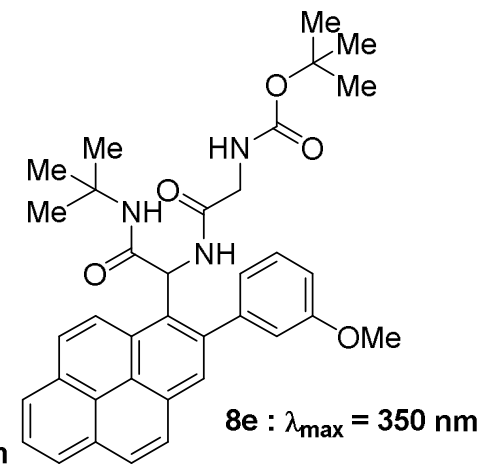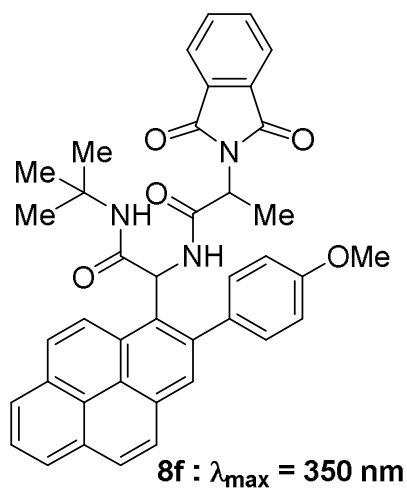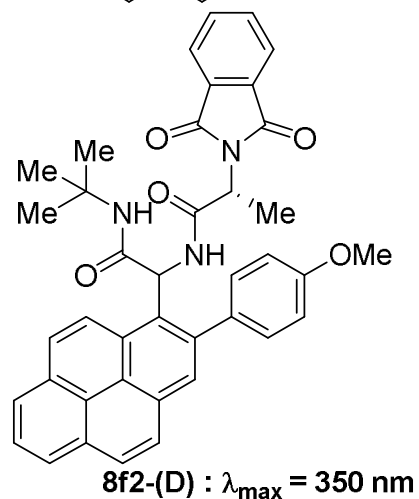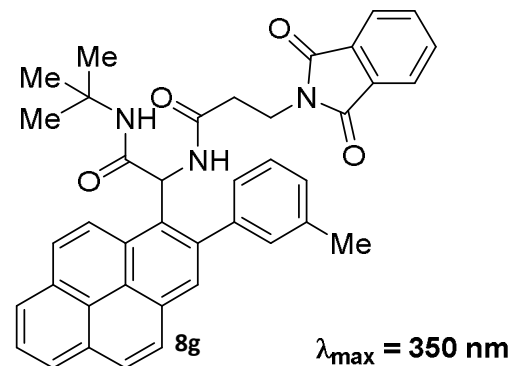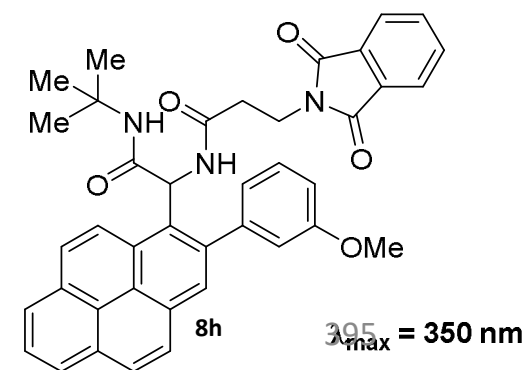

The absorption spectra (using UV-Vis spectroscopy, concentration = 0.02 g/100 mL in CHCl<sub>3</sub>) were recorded in CHCl<sub>3</sub> and  $\lambda_{\max}$  (absorption) (the absorption band appearing at the longest wavelength) of compounds **6a**, **6j**, **6z**, **6e**, **6y**

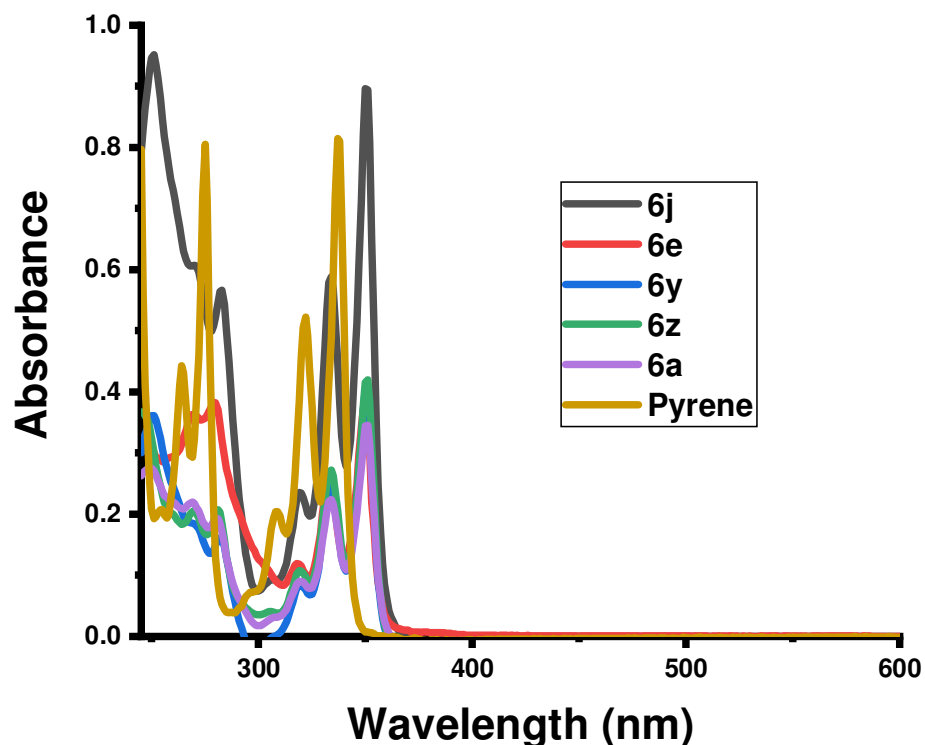

$\lambda_{\max}$  (absorption) (nm) = Pyrene: 337, **6a**: 349, **6j**: 349, **6z**: 349, **6e**: 349, **6y**: 350.

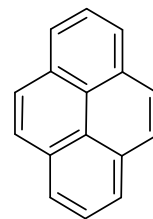

Pyrene:  $\lambda_{\max}$  = 337 nm

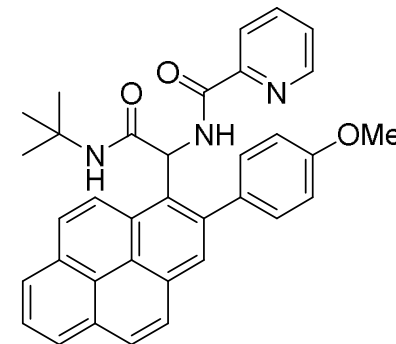

**6a**:  $\lambda_{\max}$  = 349 nm

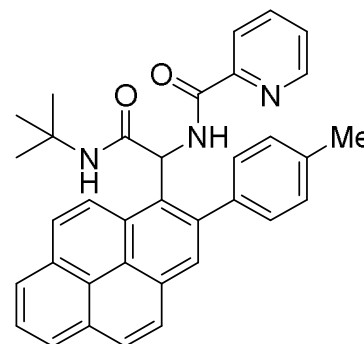

**6j**:  $\lambda_{\max}$  = 349 nm

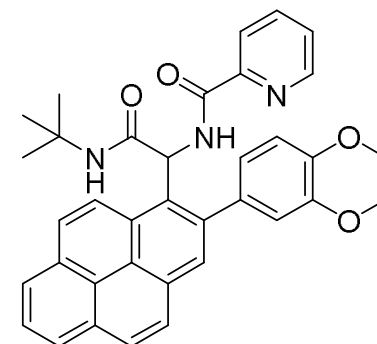

**6z**:  $\lambda_{\max}$  = 349 nm

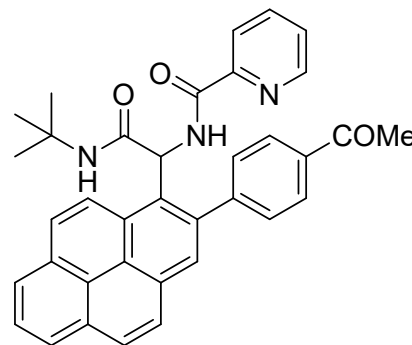

**6e**:  $\lambda_{\max}$  = 349 nm

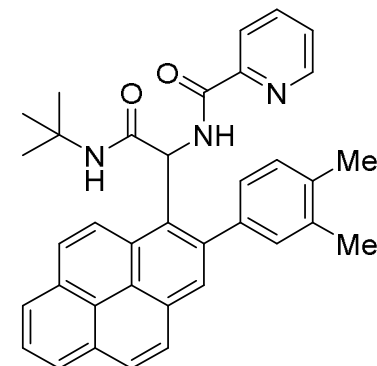

**6y**:  $\lambda_{\max}$  = 349 nm

Preliminary analysis: Emission spectra of compounds **6a**, **6j**, **6z**, **6e** and **6y** in CHCl<sub>3</sub> (concentration = 3.8 μM) at the excitation wavelength of 350 nm.

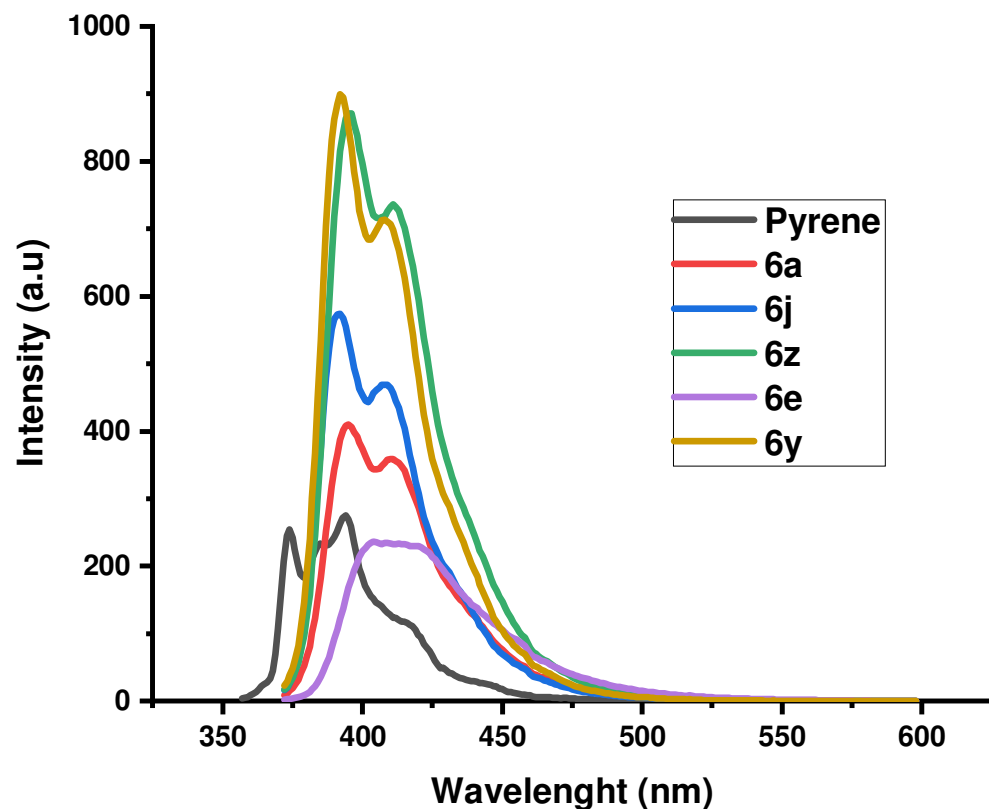

$\lambda_{\text{max (emission)}}$  (nm) at the excitation wavelength of 350 nm =  
 Pyrene: 393, **6a**: 395, **6j**: 390, **6z**: 396, **6e**: 404, **6y**: 392.

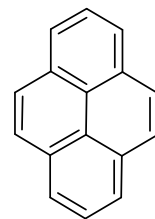

Pyrene

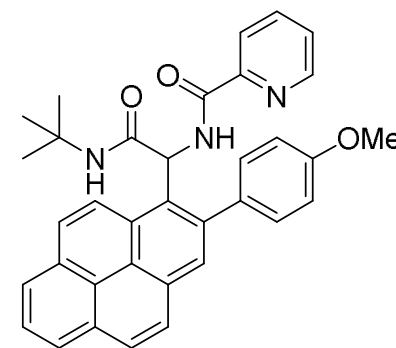

**6a**

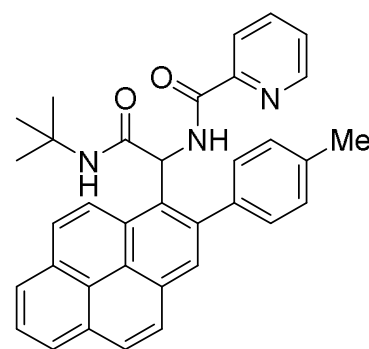

**6j**

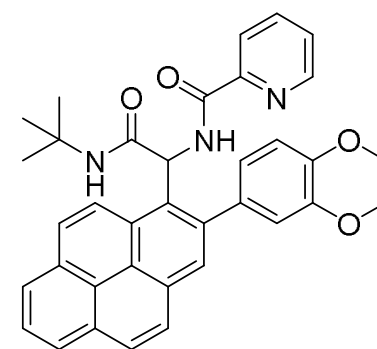

**6z**

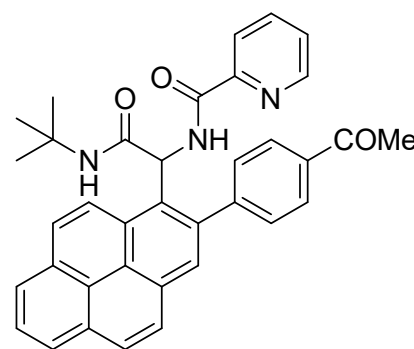

**6e**

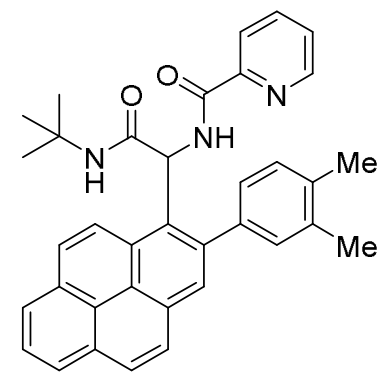

**6y**

The absorption spectra (using UV-Vis spectroscopy, concentration = 0.02 g/100 mL in THF) were recorded in THF and  $\lambda_{\text{max (absorption)}}$  (the absorption band appearing at the longest wavelength) of compounds **6a**, **6j**, **6z**, **6e**, **6y**

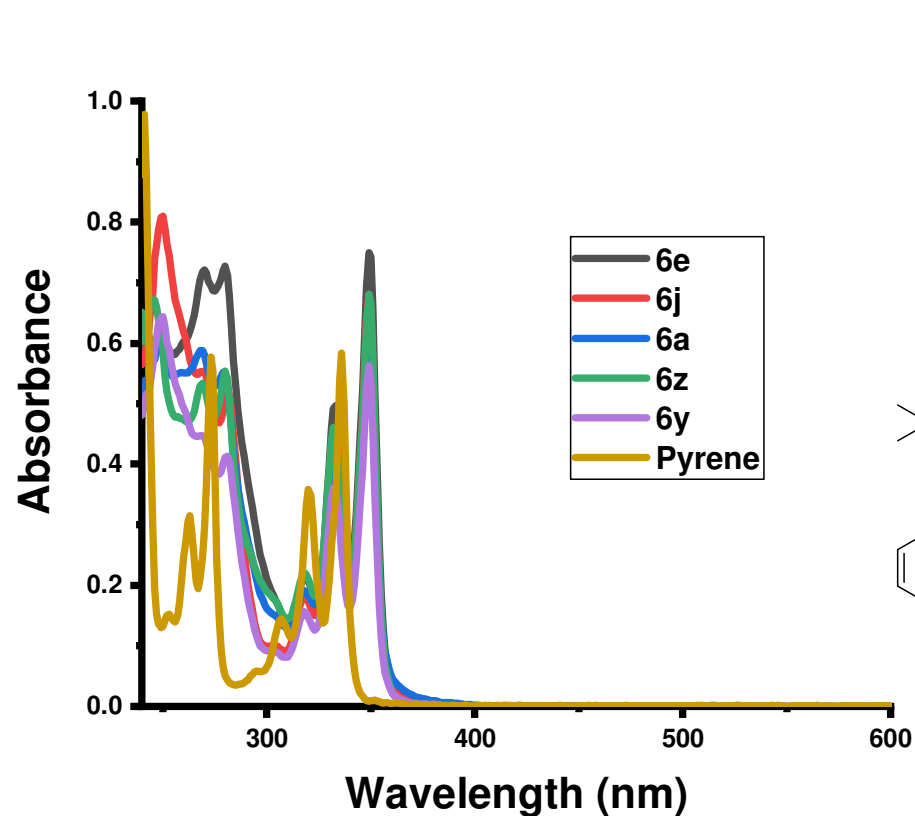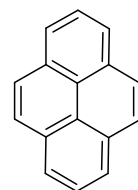

Pyrene

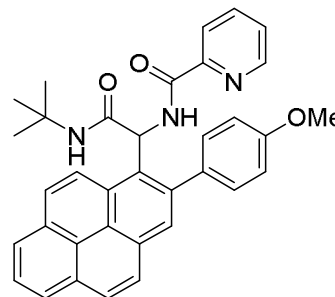

**6a**

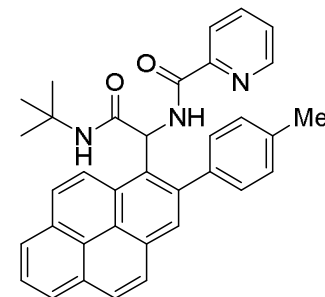

**6j**

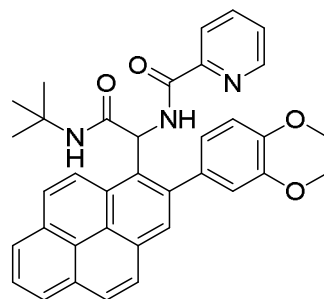

**6z**

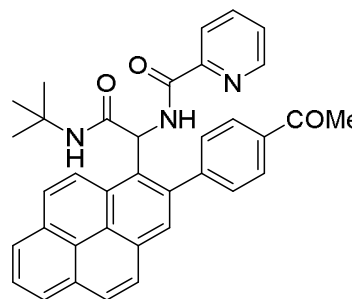

**6e**

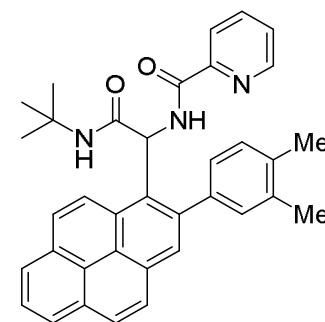

**6y**

$\lambda_{\text{max (absorption)}}$  (nm) = Pyrene: 336, **6a**: 349,  
**6j**: 349, **6z**: 350, **6e**: 349, **6y**: 349.

Preliminary analysis: Emission spectra of compounds **6a**, **6j**, **6z**, **6e** and **6y** in THF (concentration = 3.8  $\mu$ M) at the excitation wavelength of 350 nm.

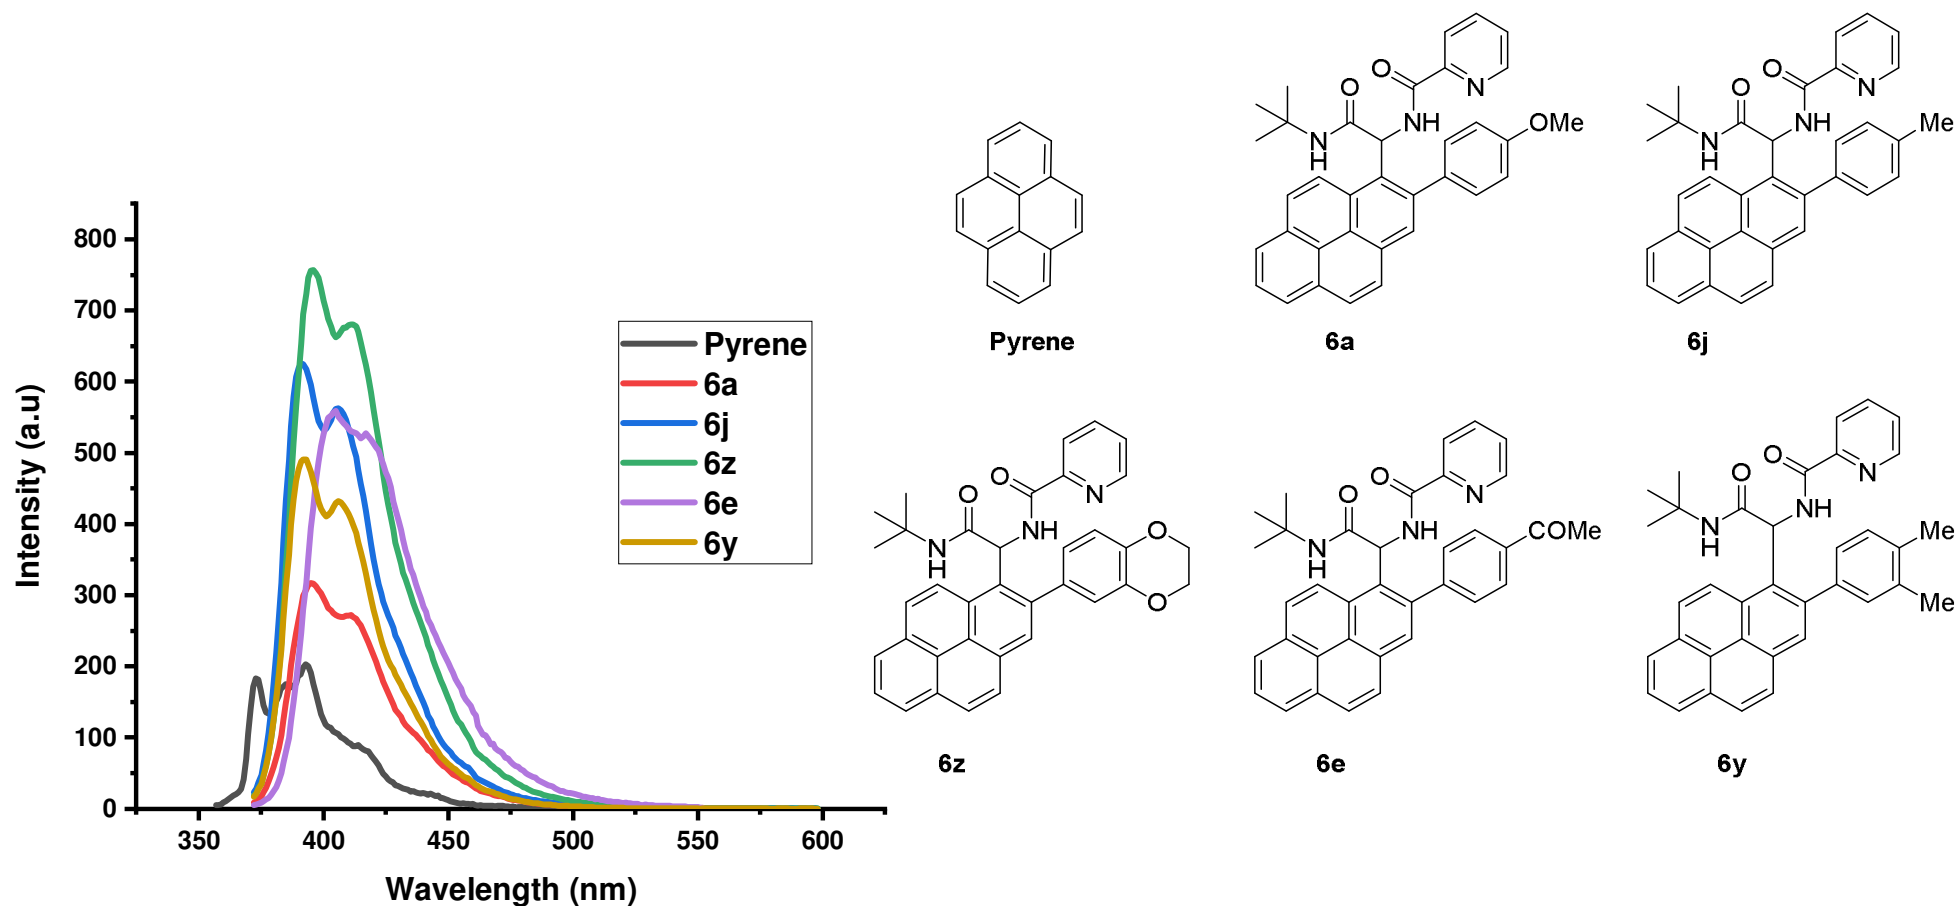

$\lambda_{\text{max (emission)}}$  (nm) at the excitation wavelength of 350 nm =  
 Pyrene: 392, **6a**: 395, **6j**: 391, **6z**: 396, **6e**: 405, **6y**: 392.

The absorption spectra (using UV-Vis spectroscopy, concentration = 0.01 g/100 mL in CHCl<sub>3</sub>) were recorded in CHCl<sub>3</sub> and  $\lambda_{\text{max}}$  (absorption) (the absorption band appearing at the longest wavelength) of compounds **7b**, **7c**, **7d**, **7e**, **7f**, **7g**, **7h**, **8a**, **8b**, **8c**, **8e**, **8f**, **8g**, **8h**.

For all the compounds  $\lambda_{\text{max}} = 350$  nm.

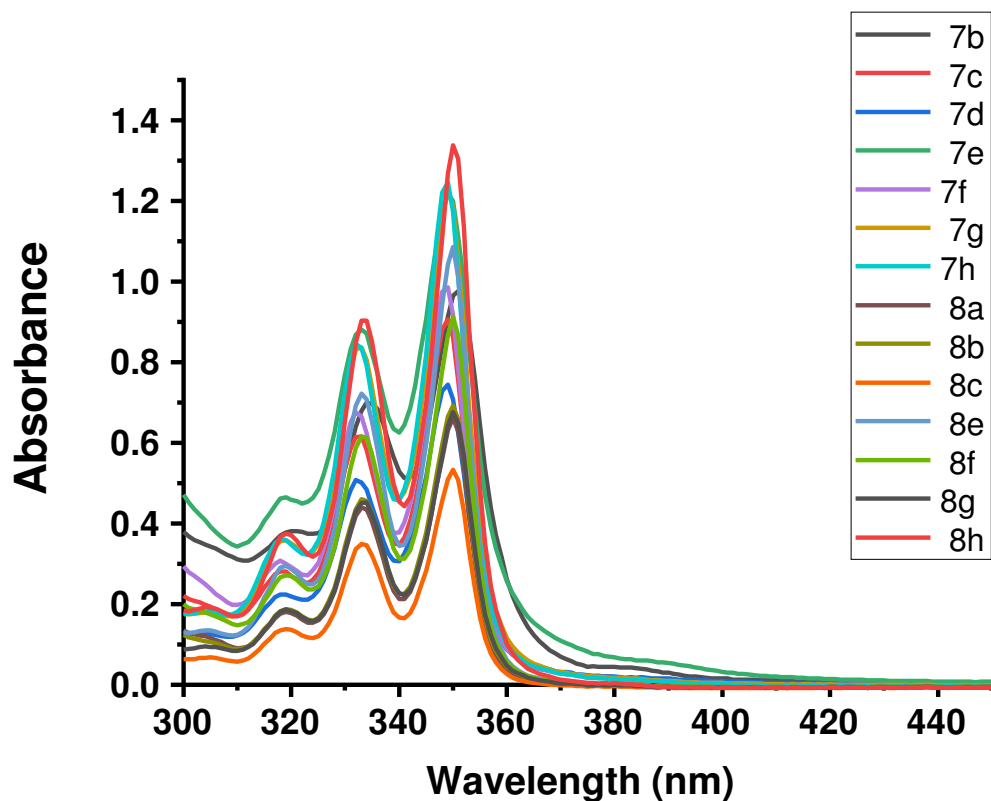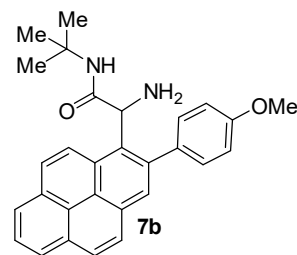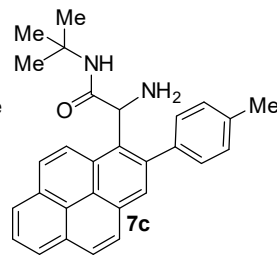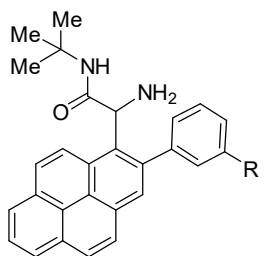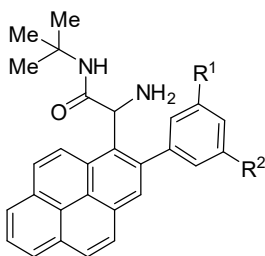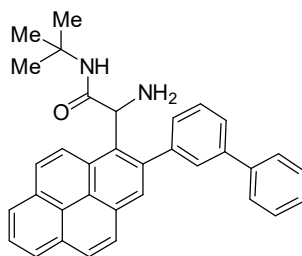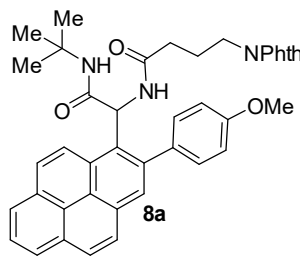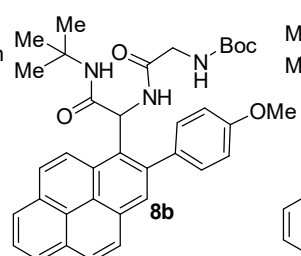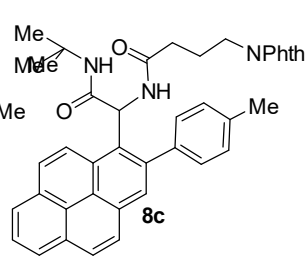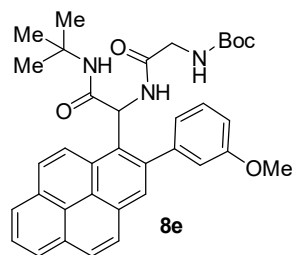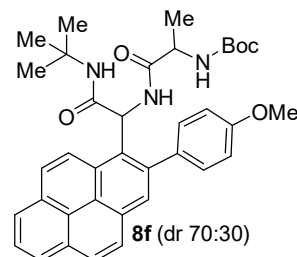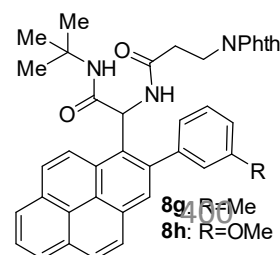



The absorption spectra (using UV-Vis spectroscopy, concentration = 0.01 g/100 mL in CHCl<sub>3</sub>) were recorded in CHCl<sub>3</sub> and  $\lambda_{\text{max}}$  (absorption) (the absorption band appearing at the longest wavelength) of compounds **6zg**, **6zh**, **6zi**, **6zj**, **6zk**, **6zl**.

For all the compounds  $\lambda_{\text{max}} = 350$  nm.

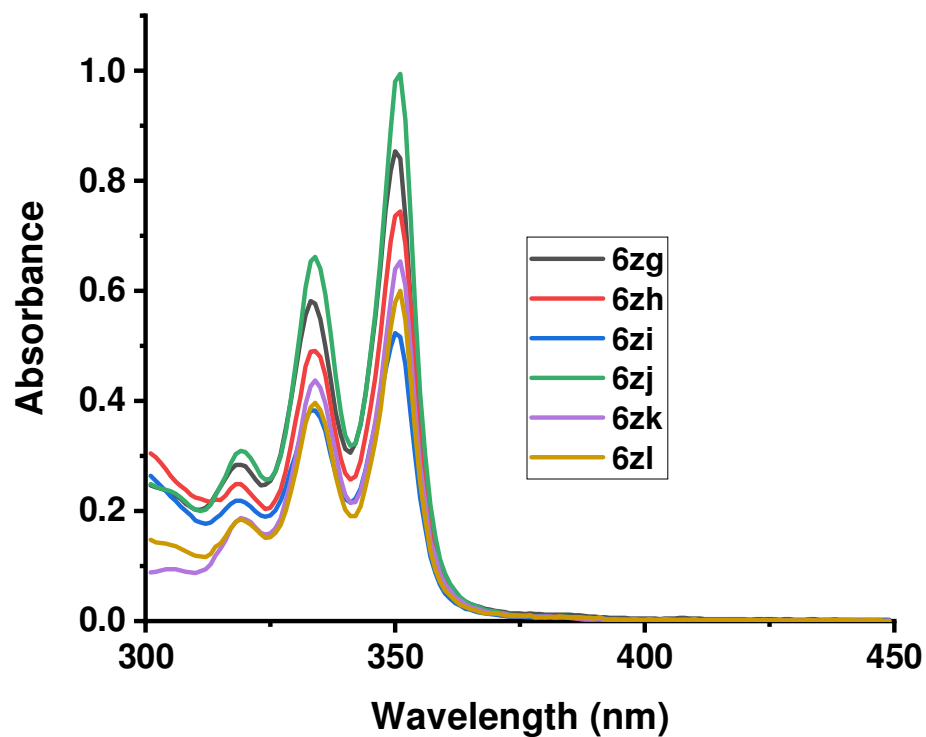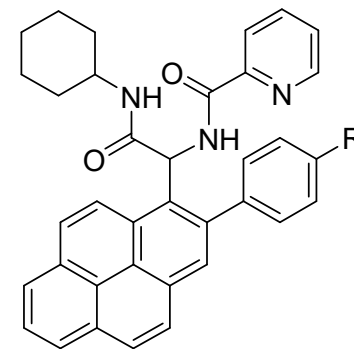

**6zh**: R = Me

**6zi**: R = Ac

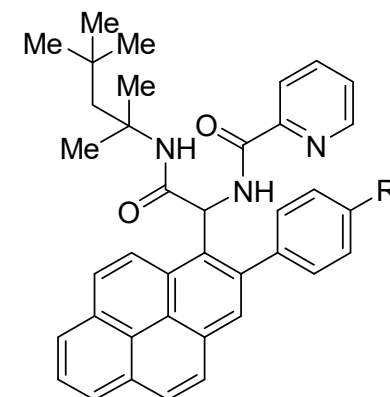

**6zk**: R = Cl

**6zl**: R = OEt

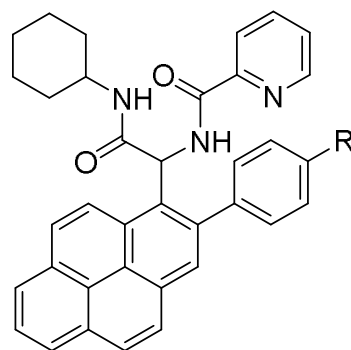

**6zg**: R = OMe

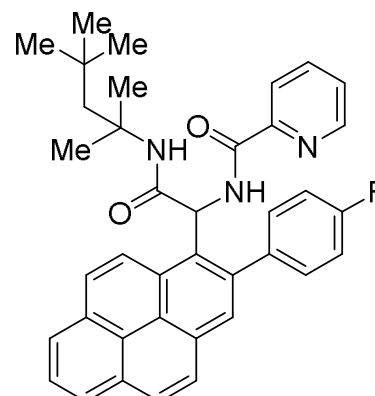

**6zj**: R = OMe

Preliminary analysis: emission spectra of **7d**, **7e**, **7g**, **7h**, **8a**, **8b**, **8c**, **8e**, **8g** in CHCl<sub>3</sub> at 350 nm. The concentration of all the sample solutions is 6.06 μM.

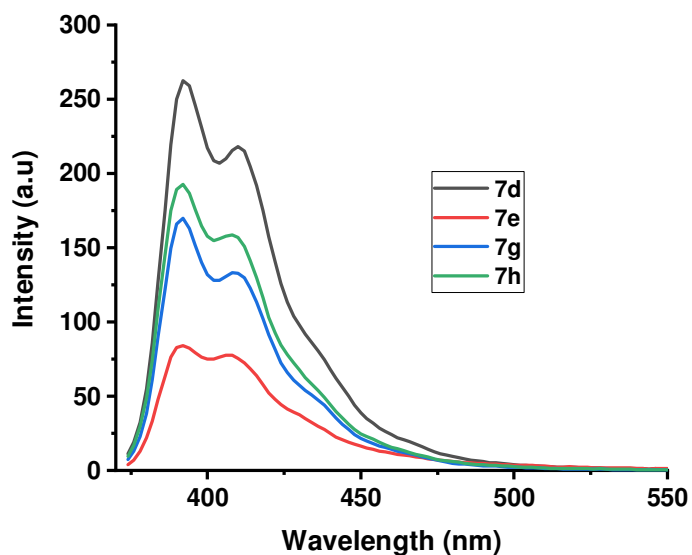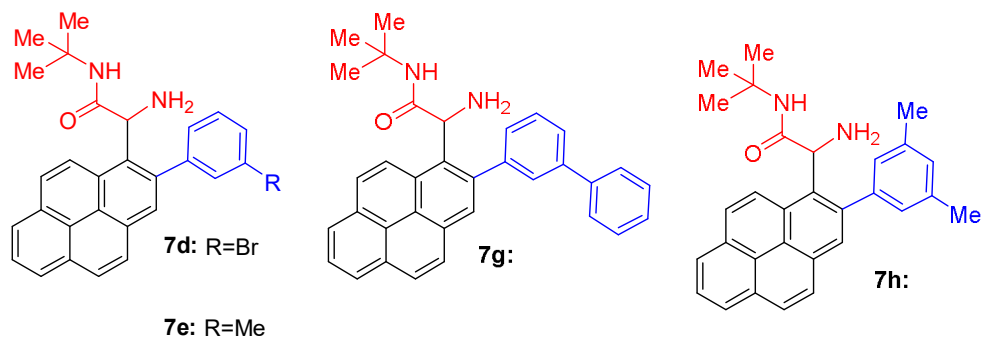

$\lambda_{\text{max}}$  (emission) (nm) at the excitation wavelength of 350 nm = **7d**: 392, **7e**: 392, **7g**: 392, **7h**: 392.

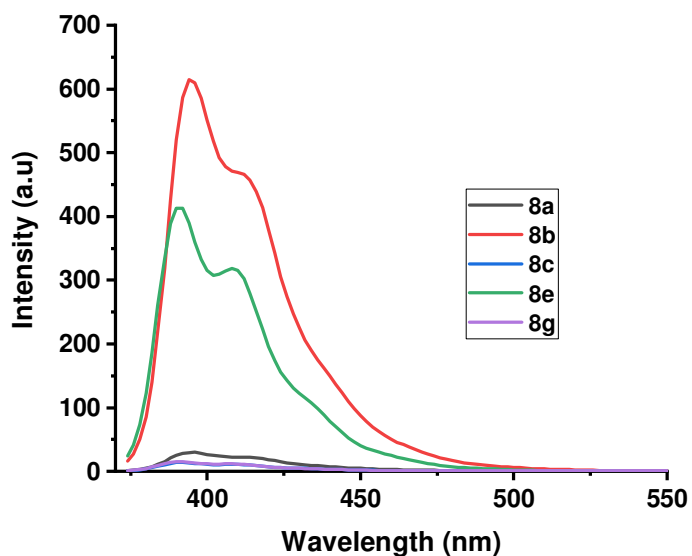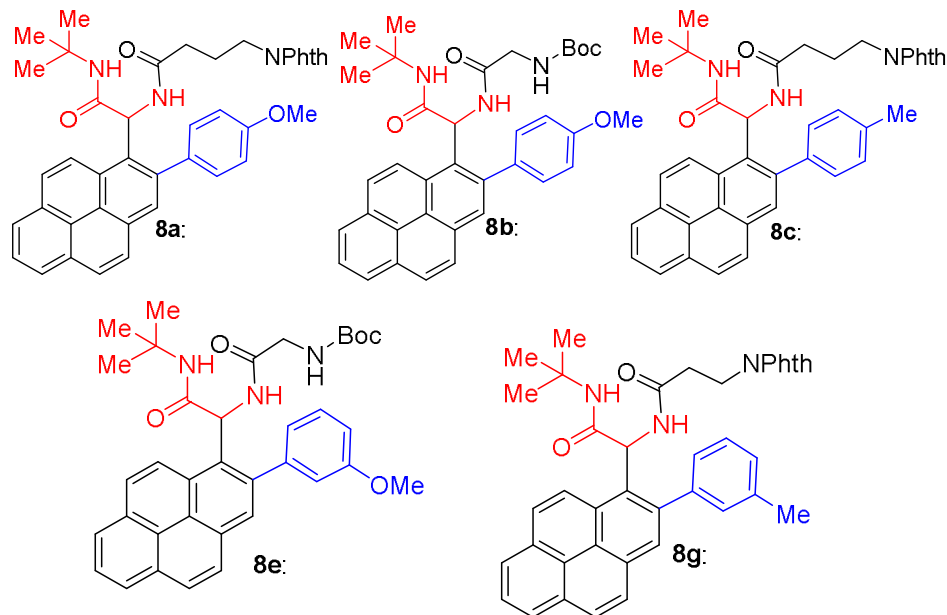

$\lambda_{\text{max}}$  (emission) (nm) at the excitation wavelength of 350 nm = **8a**: 396, **8b**: 396, **8c**: 390, **8e**: 390, **8g**: 390.

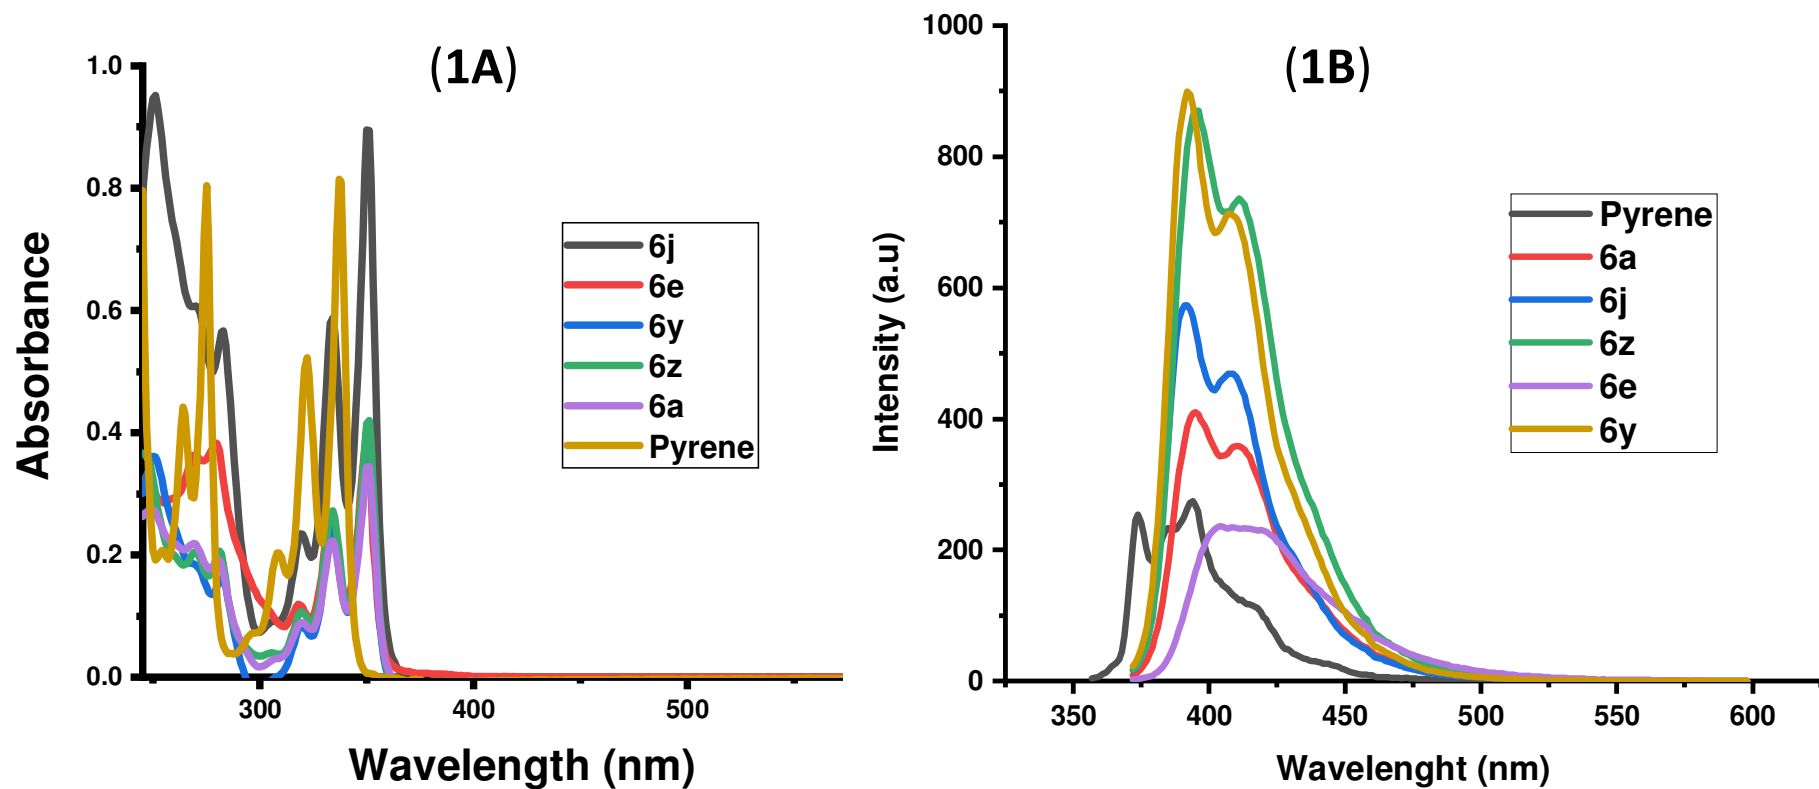

Optical absorption (**1A**) and emission (**1B**) spectra of representative compounds. (**1A**): The absorption spectra of **6a**, **6j**, **6z**, **6e** and **6y** (concentration = 0.02 g/100 mL in  $\text{CHCl}_3$ ) in  $\text{CHCl}_3$ ,  $\lambda_{\text{max}}(\text{absorption})$  (nm) = Pyrene: 337, **6a**: 349, **6j**: 349, **6z**: 349, **6e**: 349, **6y**: 350. (**1B**): Emission spectra of **6a**, **6j**, **6z**, **6e** and **6y** in  $\text{CHCl}_3$  (concentration = 3.8  $\mu\text{M}$ ) at the excitation wavelength of 350 nm  $\lambda_{\text{max}}(\text{emission})$  (nm) = Pyrene: 393, **6a**: 395, **6j**: 390, **6z**: 396, **6e**: 404, **6y**: 392.

Figure 1 (in the manuscript)

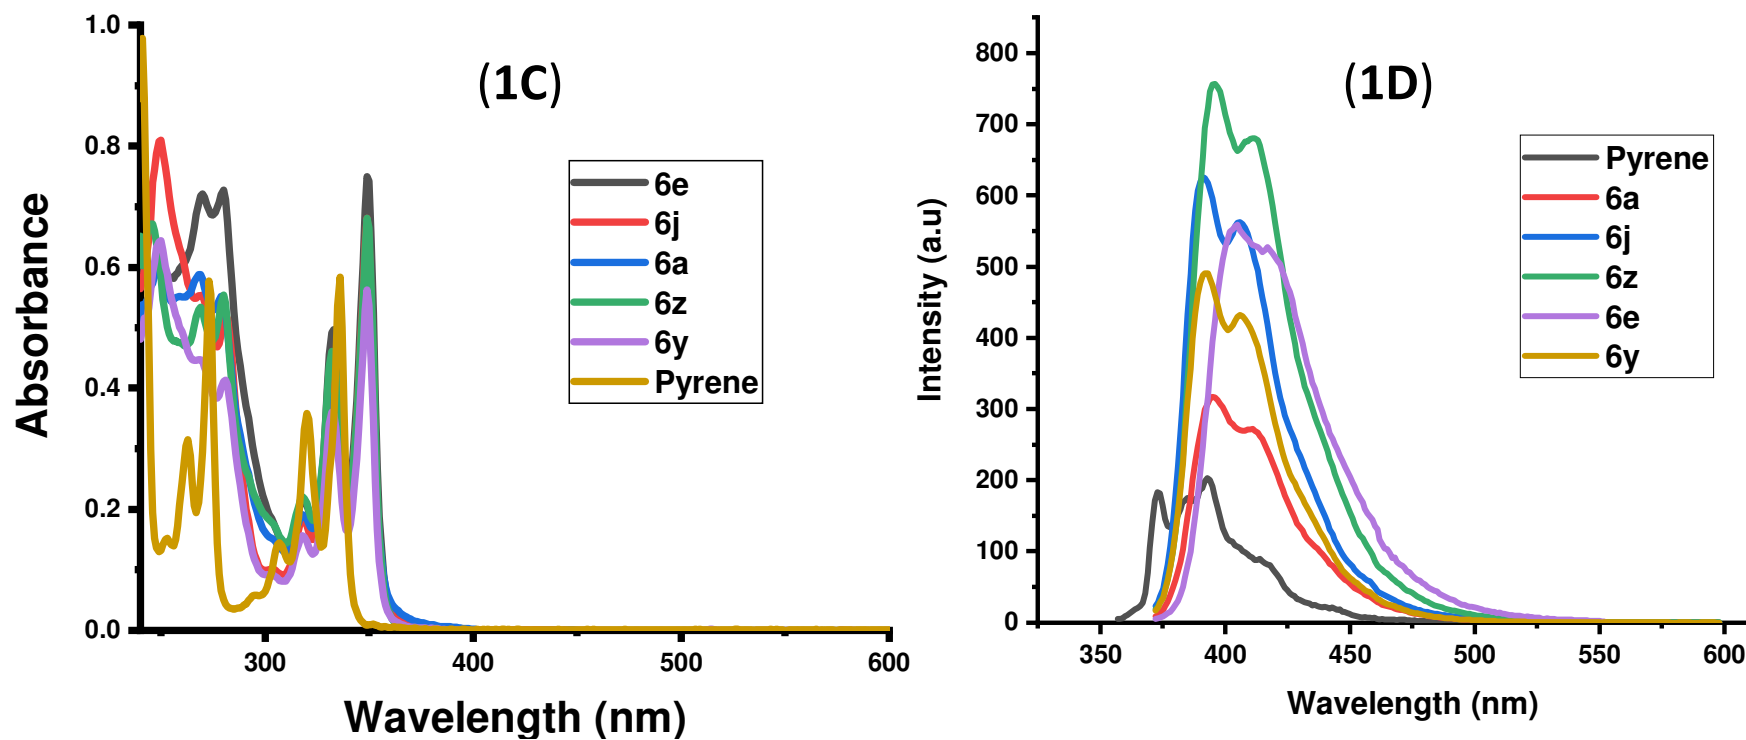

Optical absorption (1C) and emission (1D) spectra of representative compounds. (1C): The absorption spectra of **6a**, **6j**, **6z**, **6e** and **6y** (concentration = 0.02 g/100 mL in THF),  $\lambda_{\max(\text{absorption})}$  (nm) = Pyrene: 336, **6a**: 349, **6j**: 349, **6z**: 350, **6e**: 349, **6y**: 349. (1D): Emission spectra of **6a**, **6j**, **6z**, **6e** and **6y** (concentration = 3.8  $\mu\text{M}$  in THF) at the excitation wavelength of 350 nm  $\lambda_{\max(\text{emission})}$  (nm) = Pyrene: 392, **6a**: 395, **6j**: 391, **6z**: 396, **6e**: 405, **6y**: 392.

Figure 1 (in the manuscript)

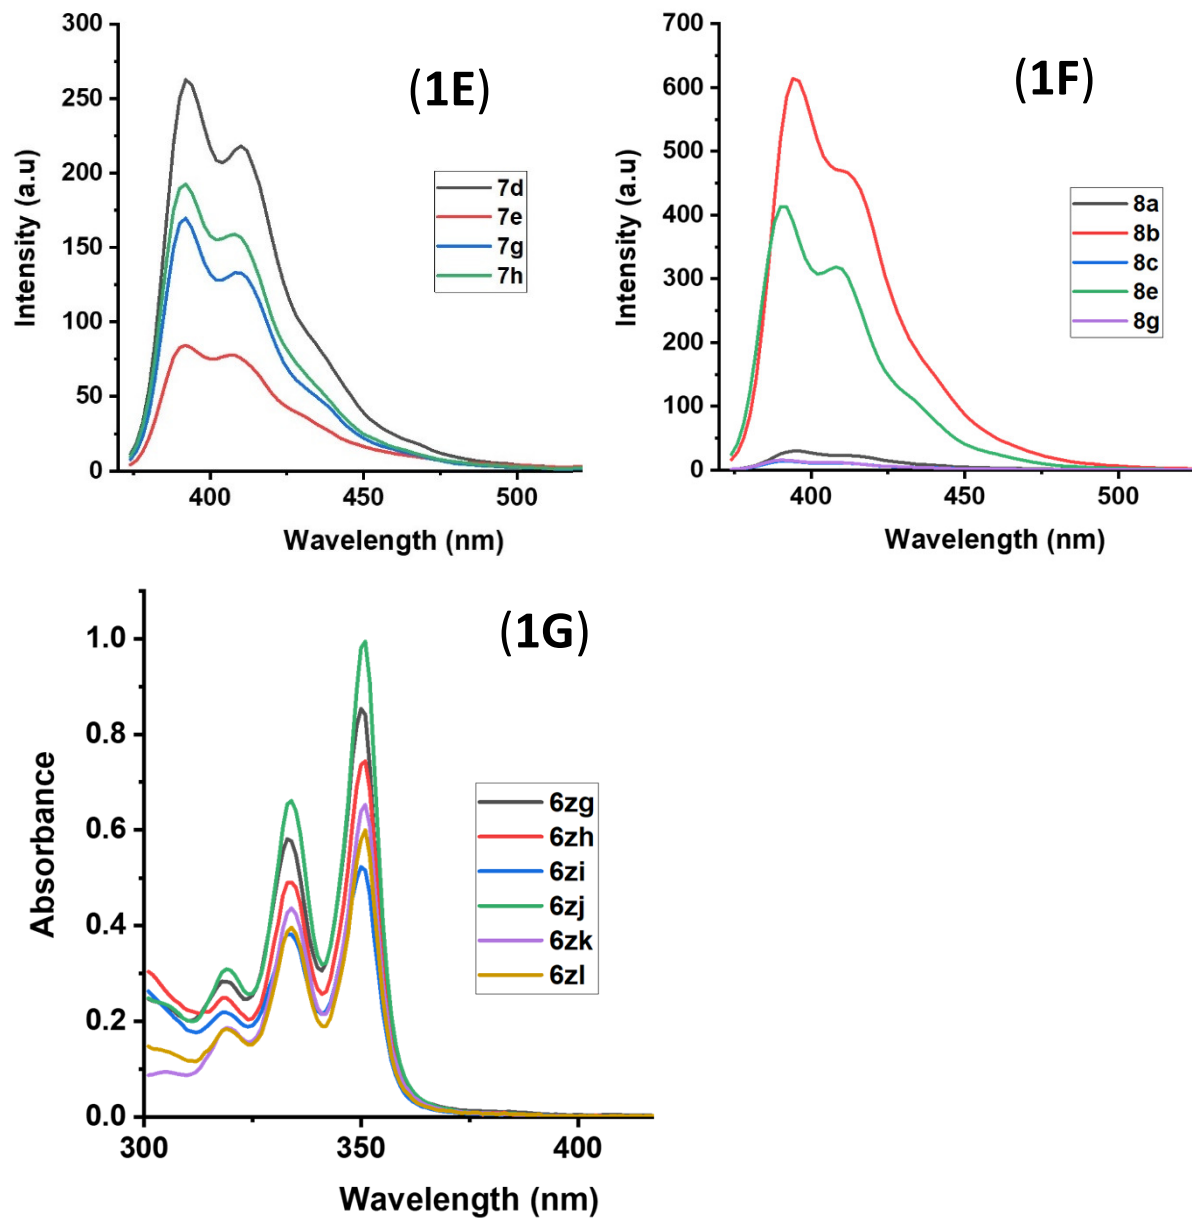

Optical absorption (1G) and emission (1E), (1F) spectra of representative compounds. (1G): The absorption spectra of **6zg**, **6zh**, **6zi**, **6zj**, **6zk** and **6zl** (concentration = 0.01 g/100 mL in  $\text{CHCl}_3$ ),  $\lambda_{\text{max (absorption)}} (\text{nm}) = \mathbf{6zg, 6zh, 6zi, 6zj, 6zk}$  and **6zl** = 350 nm. (1E) and (1F): Emission spectra of **7d**, **7e**, **7g**, **7h**, **8a**, **8b**, **8c**, **8e** and **8g** (concentration = 6.06  $\mu\text{M}$  in  $\text{CHCl}_3$ ) at the excitation wavelength of 350 nm  $\lambda_{\text{max (emission)}} (\text{nm}) = \mathbf{7d: 392, 7e: 392, 7g: 392, 7h: 392, 8a: 396, 8b: 396, 8c: 390, 8e: 390, 8g: 390}$ .

Figure 1 (in the manuscript)

### Fluorescence Quantum yield ( $\Phi$ ) calculation.

The quantum yield of **6j**, **6y**, **6z**, **7h**, **8a** was calculated using anthracene ( $\Phi = 0.27$ ) as reference (ref. A. Srivastava, S. Grewal, S. Singh, Rajani and S. Venkataramani, *ChemPhotoChem*, 2023, 7, e202300029). For the calculation of quantum yield different concentration of each compound were made in ethanol ( $\eta = 1.36$ ) with the absorbance less than 0.1 nm at 355nm. Fluorescence spectra were recorded for all the solutions at same of excited  $\lambda_{max}$ . Then by comparing the integrated photoluminescence intensity and absorbency values of all the sample solutions with the reference anthracene quantum yields were calculated. The quantum yield was calculated following the given equation below.

$$\Phi_X = \Phi_{ST} (m_X / m_{ST}) (\eta^2_X / \eta^2_{ST})$$

Where  $\Phi$  is the quantum yield,  $\eta$  is the refractive index of solvent,  $m$  is slope,  $X$  is the sample and  $ST$  is the standard.

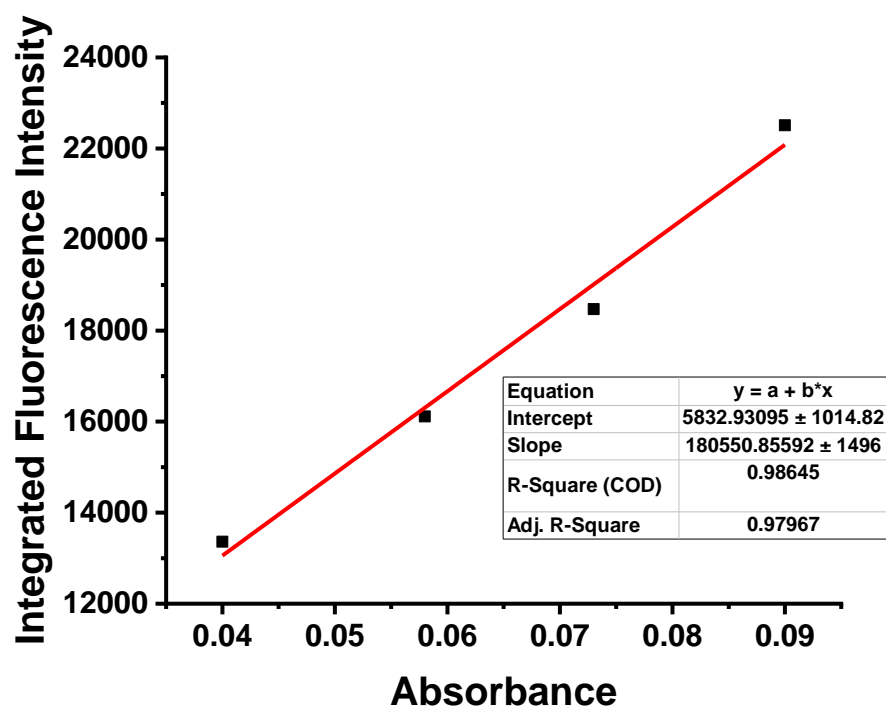

Figure S1. Integrated Fluorescence Intensity vs Absorbance plot for the anthracene.

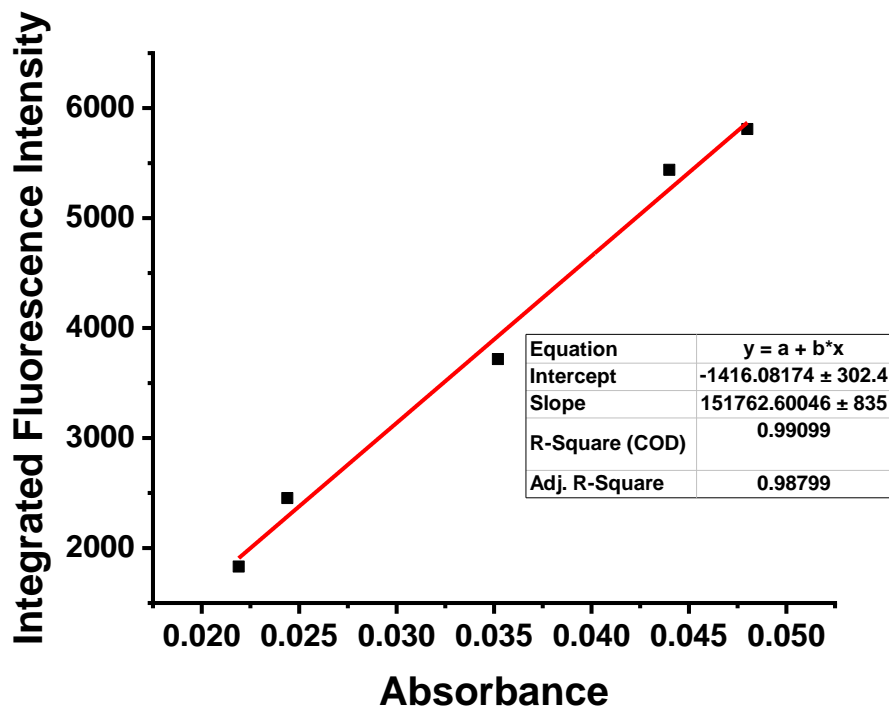

Figure S2. Integrated Fluorescence Intensity vs Absorbance plot for the compound **6y**.

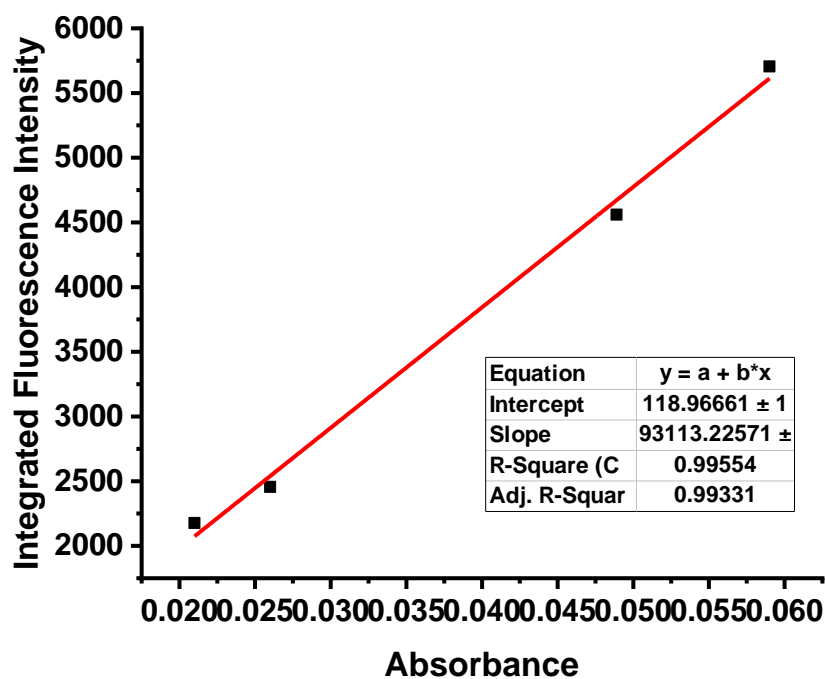

Figure S3. Integrated Fluorescence Intensity vs Absorbance plot for the compound **6a**.

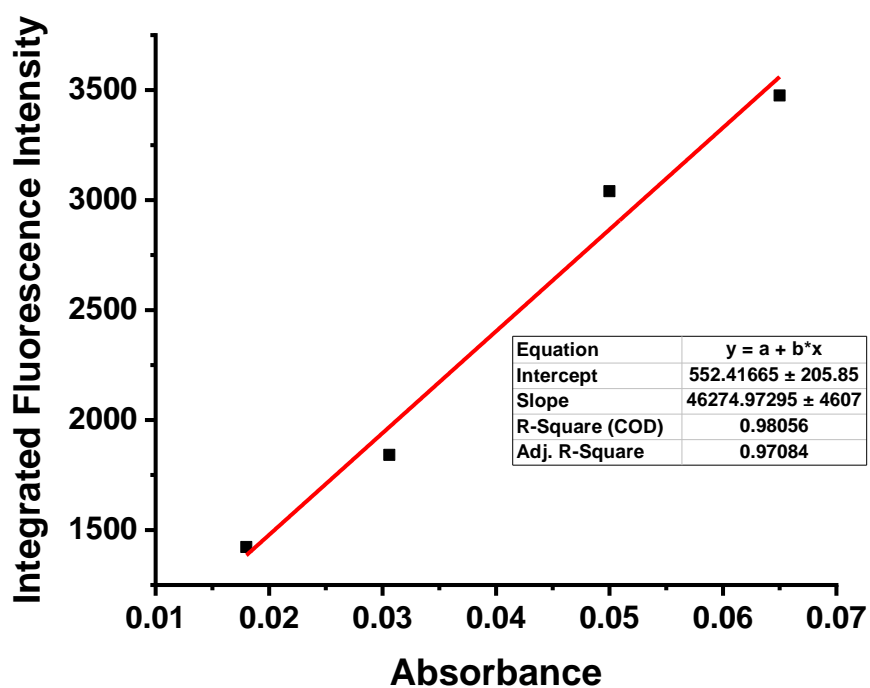

Figure S4. Integrated Fluorescence Intensity vs Absorbance plot for the compound **6j**.

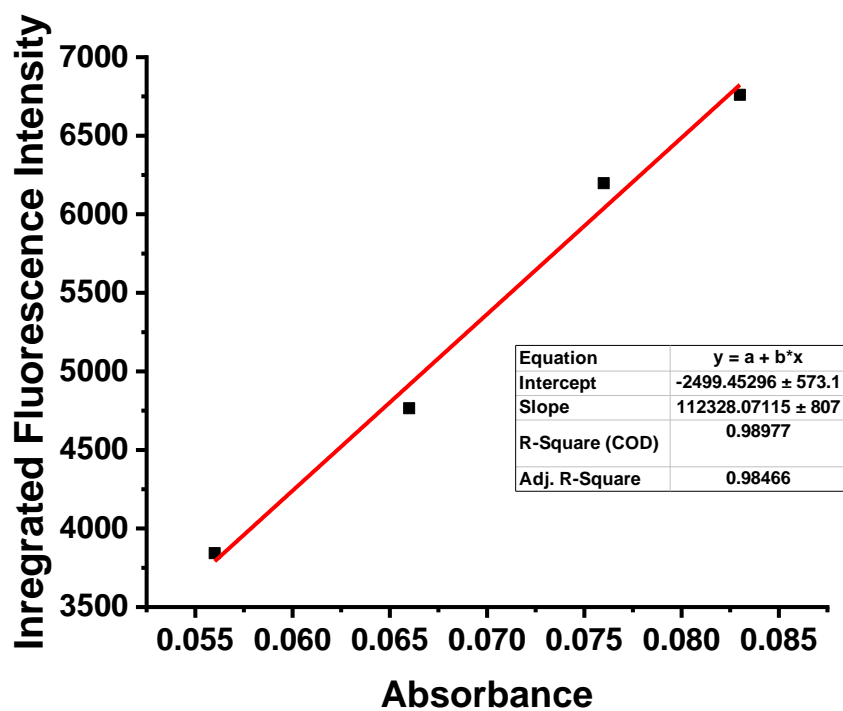

Figure S5. Integrated Fluorescence Intensity vs Absorbance plot for the compound **6z**.



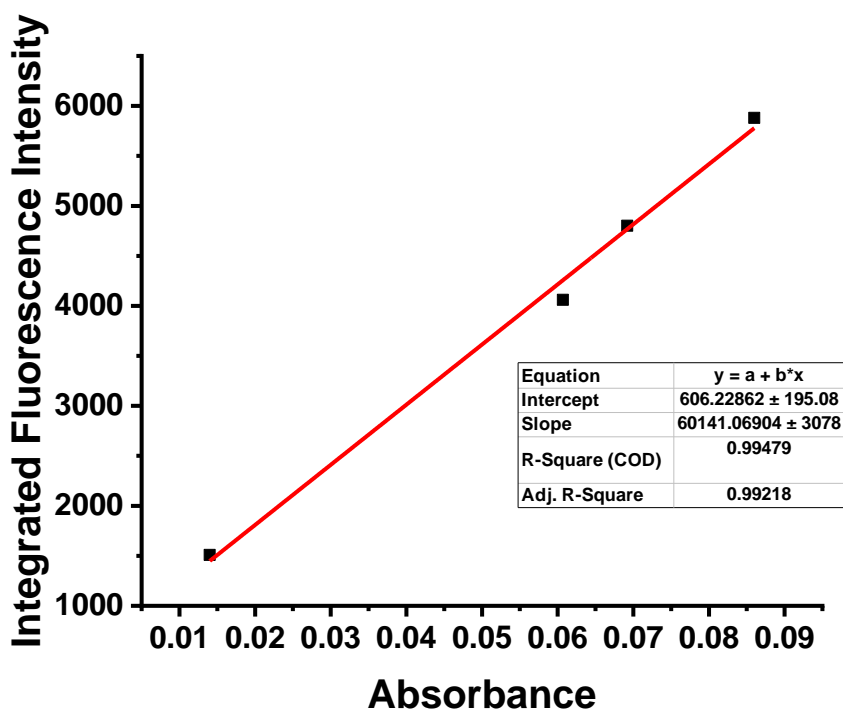

Figure S6. Integrated Fluorescence Intensity vs Absorbance plot for the compound **7h**.

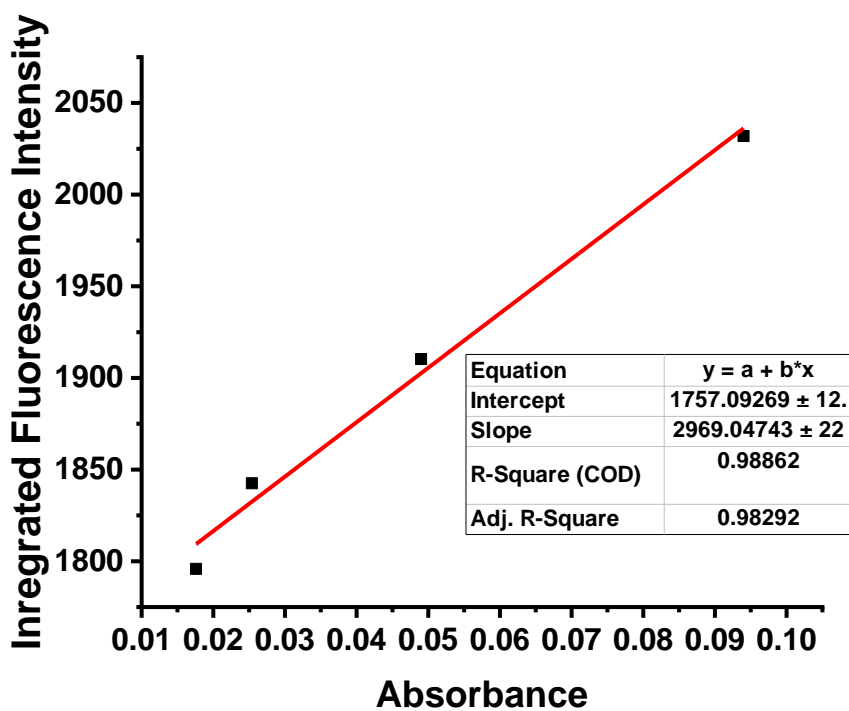

Figure S7. Integrated Fluorescence Intensity vs Absorbance plot for the compound **8a**.

**Table S1.** Quantum yield of **6y**, **6a**, **6j**, **6z**, **7h**, **8a**.

| Compound  | slope ( $m_x$ ) | quantum yield ( $\Phi$ ) |
|-----------|-----------------|--------------------------|
| <b>6y</b> | 151762.60046    | 0.226                    |
| <b>6a</b> | 93113.22571     | 0.139                    |
| <b>6j</b> | 46274.97295     | 0.069                    |
| <b>6z</b> | 112328.07115    | 0.169                    |
| <b>7h</b> | 60141.06904     | 0.089                    |
| <b>8a</b> | 2969.97295      | 0.004                    |

## Experimental

### General

$^1\text{H}$  and  $^{13}\text{C}\{1\text{H}\}$  NMR spectra of compounds were recorded (using TMS as an internal standard) in 400 and  $\sim$ 101 MHz spectrometers, respectively. The HRMS analysis data of samples were obtained from the QTOF mass analyzer using the electrospray ionization (ESI) method. FT-IR spectra of samples were recorded as neat or thin films. Column chromatography purification of crude reaction mixtures was carried out on silica gel (100–200 mesh). Reactions were conducted in anhydrous solvents under a nitrogen atm wherever required. Organic layers obtained after the workup were dried using anhydrous  $\text{Na}_2\text{SO}_4$ . Thin layer chromatography (TLC) analyses were performed on silica gel or alumina plates and components were visualized by UV light or under iodine vapor. Isolated yields of all the products are reported and yields were not optimized.

**General procedure for the synthesis of compounds 4a-h:** A solution of aromatic aldehyde (1 equiv), carboxylic acid (1 equiv), ammonia solution (7 N in methanol, 25-50 equiv), and isocyanide (1 equiv) in TFE (2 mL) was stirred at room temperature for 24 h. The reaction mixture was diluted with  $\text{CH}_2\text{Cl}_2$  and washed with water and brine. The organic extracts were combined, and dried over anhydrous  $\text{Na}_2\text{SO}_4$  and the solvent was evaporated. The crude mixture was subjected to column chromatography to afford the compound **4a-h** (Procedure adapted from ref. L. A. Polindara-García et al *Eur. J. Org. Chem.*, 2022, e202101517).

**General procedure for the synthesis of compounds 6a-z, 6za-6zc, 6zg-6zn:** A solution of pyrenylglycinamide **4a** (1 equiv), aryl iodide (4 equiv), KOAc (5 equiv),  $\text{Pd}(\text{OAc})_2$  (10 mol%), and  $\text{CuBr}_2$  (10 mol%) in dry toluene (1.5 mL) was heated in a sealed tube vial under conventional heating (oil bath) at 130 °C for 48 h. The tube was flashed with nitrogen before heating. The reaction mixture was concentrated under reduced pressure. The crude mixture was subjected to column chromatography to afford the corresponding C-H arylated pyrenylglycine.

**General procedure for the synthesis of compounds 6ze:** A solution of pyrenylglycinamide **4a** (1 equiv), methyl 4-(bromomethyl)benzoate (4 equiv),  $\text{Pd}(\text{OAc})_2$  (10 mol%),  $\text{K}_2\text{CO}_3$  (2 equiv), NaOTf (3 equiv) in *tert*-amylOH (1.5 mL) was heated in a sealed tube vial under conventional heating (oil bath) at 120 °C for 48 h. The tube was flashed with nitrogen before heating. The reaction mixture was concentrated under reduced pressure. The crude mixture was subjected to column chromatography to afford the compound **6ze**.

**General procedure for the synthesis of compounds 6zf:** A solution of pyrenylglycinamide **4a** (1 equiv), 1-iodobutane (4 equiv),  $\text{Pd}(\text{OAc})_2$  (10 mol%),  $\text{Ag}_2\text{CO}_3$  (2 equiv),  $(\text{BnO})_2\text{PO}_2\text{H}$  (0.3 equiv) in *tert*-amylOH (1.5 mL) was heated in a sealed tube vial under conventional heating (oil bath) at 120 °C for 48 h. The tube was flashed with nitrogen before heating. The reaction mixture was concentrated under reduced pressure. The crude mixture was subjected to column chromatography to afford the compounds **6zf**.

**General procedure for the synthesis of compounds 6zd:** A solution of pyrenylglycinamide **4a** (1 equiv), 1-iodopentane (4.0 equiv),  $\text{Pd}(\text{OAc})_2$  (10 mol%), KOAc (2.0 equiv) in dry 1,4-dioxane (1.5 mL) was heated in a sealed tube vial under conventional heating (oil bath) at 130 °C for 48 h. The tube was flashed with nitrogen before heating. The reaction mixture was concentrated under reduced pressure. The crude mixture was subjected to column chromatography to afford the compound **6zd**.

**General procedure for the synthesis of compounds 7a-h:** To an appropriate arylated compound **6** (1 equiv) dissolved in H<sub>2</sub>O/THF (1:1, 2-4 mL), 12 N HCl (0.33-0.5 mL) was added. The mixture was stirred at rt for 15 min. Zinc dust (15 equiv) was then added in three portions and the mixture was stirred at rt for 18-36 h. The mixture was transferred to a separating funnel with 2 N NaOH (20 mL) and extracted with ethyl acetate. The reaction mixture was concentrated under reduced pressure. The crude mixture was subjected to column chromatography to afford compound **7a-h** (the plicolinamide directing group removal procedure was carried out using the standard reported procedure).

**General procedure for the synthesis of compounds 8a-h and 8f2-(D):** An appropriate amount of *N*-protected amino acid (1 equiv), *N*-(3-dimethylaminopropyl)-*N'*-ethylcarbodiimide hydrochloride (1.1 equiv), 1-hydroxybenzotriazole hydrate (1.1 equiv) in dry DCM (5 mL) was stirred for 1 h at 0 °C under a nitrogen atmosphere. Then, an appropriate amount of amine compound **7** (1 equiv) was added to the above mixture and stirred for 24-25 h at room temperature. The resulting solution was then subjected to aqueous workup and washed with aqueous NaHCO<sub>3</sub> solution (two times). The resulting solution mixture was concentrated and purified on silica gel column chromatography (EtOAc/hexane) to give the corresponding pyrene-based peptides.

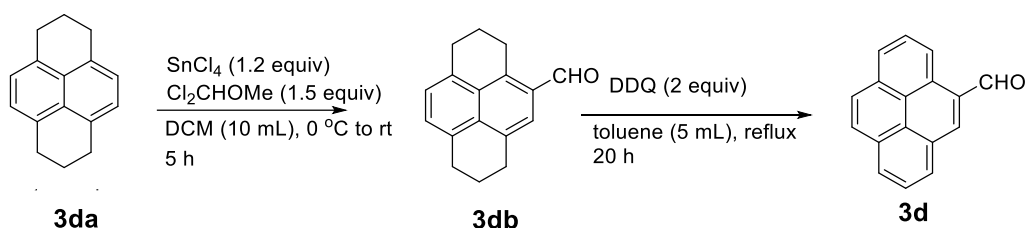

**General procedure for the synthesis of pyrene-4-carbaldehyde (3d):** To a solution of 1,2,3,6,7,8-hexahydropyrene (**3da**, 208 mg, 1 mmol) in CH<sub>2</sub>Cl<sub>2</sub> (10 mL) was added stannic chloride (140 μL, 1.2 mmol), and the mixture was cooled to 0 °C under a nitrogen atmosphere. Then, 1,1'-dichlorodimethyl ether (136 μL, 1.5 mmol) was added by a syringe, and the mixture was stirred at 0 °C for 5 h. The reaction was monitored by TLC. After completion, the reaction mixture was gradually warmed to rt and then quenched with ice water, acidified by dilute hydrochloric acid, and extracted with DCM. The organic phase was dried over anhydrous Na<sub>2</sub>SO<sub>4</sub>, filtrated, and then concentrated to get the crude product **3db** which is used for the next step without purification. To a solution of 1,2,3,6,7,8-hexahydropyrene-4-carbaldehyde (**3db**, 1 mmol) in dry toluene (5 mL) was added DDQ (2 equiv) and the reaction mixture was heated at 100 °C for 20 h. The reaction was monitored by TLC. The reaction mixture was concentrated under reduced pressure. The crude mixture was subjected to column chromatography to afford the compound **3d** (86% yield). (The preparation of **3d** was carried out using the reported procedure: (a) P.-F. Li and C.-F. Chen, *J. Org. Chem.*, 2012, **77**, 9250. (b) K. W. Bair, C. W. Andrews, R. L. Tuttle, V. C. Knick, M. Cory and D. D. McKee, *J. Med. Chem.*, 1991, **34**, 1983).
